# Supplementary material for: Single-cell RNA-sequencing reveals distinct patterns of cell state heterogeneity in mouse models of breast cancer
Source: eLife. 2020 Aug 25;9:e58810. doi: 10.7554/eLife.58810 (PMC7447441; doi:10.7554/eLife.58810)
Supplement: Figure 4—source data 1. [file elife-58810-fig4-data1.xlsx]

## Sheet: 1
	Top	p.value	FDR	logFC.2	logFC.3	logFC.4	logFC.5
Epcam	1	2.09833e-201	9.34594e-198	2.7171	3.46372	-0.85917	-0.0704781
Dtymk	1	2.06709e-111	7.67234e-109	1.33388	1.63751	1.51546	1.39782
Dctpp1	1	9.44172e-103	2.3363e-100	1.30458	1.47022	1.34626	1.33248
Spint2	2	6.7591e-170	1.50525e-166	1.38264	1.91566	-0.477772	0.256707
Hmgb2	2	1.79511e-117	7.99544e-115	2.07543	2.3281	1.91184	1.74655
Lsm4	2	2.89159e-110	9.90704e-108	1.53334	1.82591	1.26893	1.46009
Nme1	2	3.37994e-101	7.92329e-99	1.27128	1.23744	1.47183	1.37824
Lgals7	3	3.83372e-163	5.6918e-160	1.22726	3.09494	0.509648	-0.268067
Col9a3	4	1.09243e-141	1.21642e-138	0.658315	1.82229	0.821613	-0.403859
Fxyd3	5	5.66945e-136	5.05035e-133	1.6072	2.41595	-0.483716	-0.544984
H2afz	5	5.29506e-92	8.42294e-90	1.24459	1.0903	1.60452	1.3016
Cd24a	6	4.09097e-135	3.03686e-132	1.44916	2.1844	0.252861	0.318095
Stmn1	6	1.03941e-96	2.10433e-94	1.19023	1.13292	1.09943	1.05907
Anp32b	6	4.84025e-90	7.18616e-88	0.955231	1.70745	1.42622	0.975586
Spc24	6	1.13098e-70	6.219e-69	0.996852	1.03443	1.04568	1.0779
Eif3g	7	4.22266e-123	2.68682e-120	0.538455	2.3042	0.753554	0.576485
Nucks1	7	3.95608e-93	6.52606e-91	1.44355	1.56184	1.24606	1.22146
Hmgn2	7	7.55835e-78	6.47402e-76	0.820659	0.719359	1.03309	1.02203
Krt18	8	6.00594e-121	3.34381e-118	1.80098	2.457	-1.62002	0.551825
Dut	8	5.59898e-86	7.12511e-84	0.842357	1.13854	1.22147	1.03859
Pclaf	8	4.13858e-73	2.56017e-71	1.15925	0.976468	1.1288	1.15936
Nrtn	9	1.11759e-120	5.53084e-118	1.08541	1.52534	0.446973	0.275171
Rbm3	9	9.71302e-90	1.39554e-87	1.42953	0.923851	1.28009	1.02121
Snrpg	9	7.7786e-79	7.07059e-77	0.816884	1.54503	1.32455	1.00144
Selenoh	9	1.43775e-77	1.20825e-75	1.18272	1.05045	1.13235	1.13544
Cdk4	10	3.99819e-78	3.56159e-76	0.598893	0.76991	1.1292	0.911561
Mia	11	2.04685e-113	8.28789e-111	0.115897	1.67227	0.521313	-0.384581
Rab25	11	2.83521e-95	5.26167e-93	0.913668	1.12095	-0.181739	0.430406
Ranbp1	11	6.56328e-65	2.89434e-63	0.955755	0.667657	1.04607	1.16054
Dpy30	12	1.15607e-108	3.52953e-106	1.00194	1.40988	0.871452	0.844452
Sfn	12	7.74695e-86	9.32565e-84	1.7361	2.08897	-0.370304	-1.48664
Thyn1	12	1.19808e-73	7.73368e-72	0.60481	1.31756	1.16105	1.1138
Taf1d	13	1.18866e-108	3.52953e-106	0.016075	2.27948	0.411659	-0.044163
Tuba1b	13	2.10004e-76	1.64098e-74	0.494754	0.485274	1.58783	1.1989
Erh	13	5.4039e-75	3.82047e-73	1.01388	1.07632	1.06691	1.05872
Cwc15	14	1.83069e-108	5.09619e-106	0.24029	1.98611	0.816949	0.88042
Pgk1	14	1.77185e-80	1.83531e-78	1.32553	1.45889	1.08146	0.767773
Fkbp3	14	8.966e-61	3.66372e-59	0.85483	0.979668	0.923452	0.967292
Lsr	15	2.91172e-107	7.62869e-105	0.883951	1.16663	0.0569867	-0.00020577
Pkm	15	7.44482e-78	6.47402e-76	1.32334	0.945938	0.925637	0.548214
Siva1	15	4.80383e-74	3.19347e-72	0.761065	0.907926	1.10799	0.640362
3110079O15Rik	16	2.79611e-100	6.22694e-98	2.00099	2.67059	0.333256	-0.137408
Mpp6	17	1.86032e-98	3.94564e-96	0.43295	1.25685	0.635273	0.550178
Lsm6	17	3.8377e-71	2.13664e-69	0.91696	0.791044	0.797235	0.929543
Dek	18	1.05989e-72	6.46679e-71	0.876838	1.0344	1.16011	1.01624
Banf1	18	1.84487e-59	7.20793e-58	0.898851	0.859819	0.903253	1.03594
Npm3	19	1.19248e-95	2.30926e-93	1.18182	1.60677	1.12344	0.943238
Prmt1	19	6.96228e-72	4.02727e-70	0.715936	0.899384	1.08177	0.897225
Nhp2	19	4.58993e-69	2.29703e-67	1.11091	1.47523	1.1523	1.12524
Ndufb7	20	2.29766e-76	1.76444e-74	1.06216	0.661511	0.596551	0.860028
Polr2f	20	6.97033e-56	2.38814e-54	0.811773	1.07398	0.84712	1.03242
Tst	21	1.50723e-94	2.68528e-92	0.721341	1.16245	0.483599	0.694765
Tmem238	21	8.62003e-80	8.72582e-78	0.867679	1.03466	0.444203	0.824461
Hspd1	21	1.99751e-77	1.64758e-75	1.15122	1.7641	1.35033	1.02222
Tuba4a	22	3.64974e-94	6.25229e-92	1.05313	1.50425	0.0120784	-0.42402
Cdkn2a	22	2.12338e-75	1.52541e-73	1.35142	0.718695	0.70159	0.454602
Slc25a4	22	9.42829e-70	4.88298e-68	0.356094	0.192329	1.25975	0.559119
Birc5	22	2.48314e-59	9.61732e-58	0.968799	0.90187	0.900488	0.964834
Krt14	23	1.07024e-74	7.44822e-73	1.96753	2.31263	0.595871	-1.32439
Wfdc2	24	1.68461e-90	2.58732e-88	1.34939	1.74722	-0.954698	0.306317
Ndufa10	24	5.0524e-79	4.6882e-77	1.07383	1.40673	0.799258	0.64868
Mcm6	24	3.87238e-70	2.07802e-68	0.802147	0.80898	0.762127	0.756934
Dnajc9	25	2.91894e-71	1.64569e-69	0.706312	0.939726	0.809861	0.790288
Elof1	26	2.03955e-88	2.8388e-86	0.216745	1.52941	0.68123	0.775
Cldn7	26	1.15946e-79	1.12266e-77	1.2193	1.48103	-0.920637	0.727199
Acot1	27	1.65314e-87	2.23124e-85	0.687224	1.16444	0.300549	0.510509
Fkbp4	27	3.1274e-67	1.51407e-65	0.59896	1.2361	1.12603	0.575299
Mif	27	1.35581e-65	6.16203e-64	1.23389	1.41076	1.15841	1.12726
Sdc4	28	4.95406e-87	6.48982e-85	0.330682	1.54699	-0.373235	-0.618809
Mrpl34	28	1.13558e-72	6.83145e-71	0.980996	1.13842	0.89305	0.811499
Vim	28	1.09931e-66	5.26485e-65	-1.54391	-2.25061	1.76775	0.106632
Sf3b5	28	8.94491e-48	2.14197e-46	0.495313	0.331344	0.612128	0.778883
Perp	29	6.58518e-86	8.14733e-84	0.821364	1.21907	0.210656	-0.298576
Akr1b3	29	9.82807e-66	4.55981e-64	0.620127	0.536629	0.989817	0.746566
Gmnn	29	1.3248e-57	4.7973e-56	0.621421	0.678942	0.571767	0.606476
Ap1m2	31	9.19572e-85	1.05371e-82	0.757152	0.984092	0.187818	0.481567
Set	31	5.83859e-65	2.60051e-63	0.715123	1.45483	1.16373	0.729897
Tyms	31	5.58291e-51	1.51624e-49	0.598452	0.624354	0.696855	0.681728
Dcun1d5	32	9.22645e-85	1.05371e-82	-0.400463	1.67546	0.729197	0.516894
Cks2	32	8.26573e-65	3.60937e-63	0.971506	0.932359	1.12506	0.808715
S100a14	33	3.73445e-83	4.15831e-81	1.12128	1.42106	0.339323	0.114252
Cks1b	33	2.8358e-62	1.19157e-60	0.979837	1.04586	0.999558	0.830336
Krt8	34	3.57524e-81	3.88393e-79	1.3691	1.92561	-1.76404	0.304524
Pfdn6	34	1.62263e-70	8.81365e-69	1.01275	0.983073	0.690311	0.768023
Lgals1	34	5.02023e-62	2.08973e-60	-0.545174	-1.83186	1.4811	0.323571
Kcnk1	35	3.81373e-81	4.04437e-79	0.614403	0.956029	0.0193572	0.388742
C1qbp	35	1.92852e-65	8.6764e-64	0.963763	1.3094	1.04766	0.912799
Cdca8	36	1.00747e-49	2.5938e-48	0.616702	0.547948	0.558054	0.582886
Pop5	37	8.83611e-80	8.74579e-78	0.671413	1.17802	0.503693	0.405395
Fabp5	37	2.9243e-72	1.71379e-70	0.783575	1.984	1.62181	0.165599
Mcm5	37	2.38408e-51	6.51454e-50	0.611405	0.582788	0.625312	0.586659
Emb	38	1.32936e-79	1.25978e-77	1.13126	1.45551	1.17029	-0.316723
Gpx2	39	1.53639e-75	1.12182e-73	1.02216	1.25885	0.720949	0.365831
Snrpa1	39	5.88261e-59	2.25872e-57	0.727766	0.680449	0.813202	0.717656
Mcm3	39	1.72193e-49	4.38256e-48	0.458853	0.633448	0.612145	0.576045
H2afv	40	2.84319e-58	1.06417e-56	0.597628	0.997605	1.07152	0.769405
Snrpf	40	4.06474e-54	1.25725e-52	0.631791	0.749142	0.971346	0.918637
Snrpd1	41	2.97009e-58	1.1024e-56	0.716492	1.20316	1.07705	0.886548
Cnmd	42	4.04254e-77	3.27372e-75	1.27873	1.59509	0.796428	0.146964
Rp9	43	9.11764e-77	7.25178e-75	-0.25868	1.45689	0.311898	0.108914
Arhgdib	43	1.06356e-57	3.88288e-56	0.864963	0.710628	1.2232	0.835183
Ube2c	43	1.85834e-51	5.10929e-50	1.0788	0.83685	0.889451	0.966321
Sycp1	44	4.37522e-76	3.30292e-74	0.337667	1.03083	0.557219	0.410104
Hells	44	2.52066e-44	5.37179e-43	0.590509	0.663935	0.587467	0.615172
Wwp2	45	9.37697e-76	6.96084e-74	0.987985	1.24884	0.443399	0.281304
Igfbp2	45	1.05695e-56	3.64934e-55	0.232117	0.696663	1.45762	-0.398388
Sssca1	46	5.30984e-74	3.47795e-72	0.874626	1.08968	0.785651	0.658617
Ssrp1	46	4.50403e-55	1.49709e-53	0.784522	0.78261	0.672334	0.745258
Dnmt1	47	3.06852e-74	2.10264e-72	0.195833	1.07142	0.653698	0.585359
Cdca3	47	2.3727e-42	4.80061e-41	0.580089	0.53367	0.562948	0.573233
Spats2l	48	3.65128e-74	2.46406e-72	0.736928	1.10322	0.679475	0.146869
Serpinb5	48	3.73623e-69	1.89104e-67	1.06567	1.29157	0.347281	-0.28939
Mgp	48	2.77501e-55	9.36354e-54	-1.98899	-1.48445	1.75377	0.212482
Anln	49	2.96582e-63	1.25807e-61	0.929754	1.10908	0.841987	0.759706
Bok	49	3.28385e-55	1.09972e-53	0.706229	0.460538	0.754699	0.408173
Pdap1	49	1.54163e-45	3.43321e-44	0.497698	1.17833	0.872854	0.951769
Dap	50	5.13147e-55	1.693e-53	0.492534	0.64014	1.03986	0.619409
Exosc8	50	5.71408e-51	1.54245e-49	0.70394	0.704442	0.614966	0.66399
Cldn3	51	1.21979e-73	7.76136e-72	1.21676	1.72127	-1.77575	0.836384
Crb3	51	1.65136e-60	6.50901e-59	0.597466	0.673114	-0.335652	0.135203
Lyar	51	4.37923e-53	1.26656e-51	0.743001	0.978263	0.888039	0.834204
Dbi	52	2.80061e-73	1.75689e-71	1.37353	1.86777	0.690783	1.26631
Cldn6	52	4.30658e-68	2.10786e-66	0.832417	1.03129	0.199217	0.316775
Vcan	52	1.90338e-54	6.01253e-53	0.273584	-0.259936	0.82327	0.0535537
Cenpm	52	2.05674e-45	4.55758e-44	0.543872	0.40721	0.533827	0.526293
Ndufb8	53	5.13142e-54	1.57623e-52	1.01779	1.01498	0.71116	0.969524
Aasdhppt	54	1.15033e-72	6.83145e-71	0.176939	1.08488	0.589207	0.451614
Lig1	54	1.29361e-41	2.52707e-40	0.556013	0.642208	0.578708	0.597874
Tubb5	55	9.38652e-54	2.86353e-52	0.860622	0.807233	1.38565	0.67681
Pgam1	56	1.08579e-53	3.28986e-52	0.701786	0.745124	1.03472	0.564878
Smc4	56	8.96219e-52	2.47935e-50	0.993012	0.923207	0.951388	0.924927
Cadm1	57	2.06547e-71	1.17943e-69	0.426939	0.71549	0.341344	-0.108776
Tmpo	57	7.96526e-40	1.43633e-38	0.498616	0.530857	0.460107	0.555132
Kcnn4	58	2.0649e-58	7.86073e-57	0.820686	0.977535	0.247073	0.267479
Mest	58	2.99842e-54	9.33913e-53	-0.57826	1.20177	1.11528	0.352578
Ccdc34	59	7.79657e-57	2.73433e-55	0.931955	1.01611	0.789682	0.745406
Smc2	59	1.16195e-48	2.89125e-47	0.6822	0.607859	0.694998	0.648765
Acp5	60	4.5697e-70	2.42303e-68	0.105197	1.13097	0.383165	0.0213782
Tspan13	60	1.00709e-65	4.62432e-64	0.716713	0.877583	0.261331	0.615794
Fbln1	60	2.93321e-52	8.26867e-51	0.354393	0.0522693	0.741882	0.226791
Bzw2	61	5.39081e-70	2.82478e-68	0.57713	1.0851	0.406966	0.573798
Cdk1	61	6.24637e-39	1.10842e-37	0.694256	0.54989	0.662564	0.665326
Ceacam1	63	1.25585e-69	6.42938e-68	0.600698	0.924825	-0.832357	-0.010144
Wfdc5	63	5.12278e-61	2.11267e-59	0.733719	0.892779	0.60075	0.402045
Mcm7	63	5.18693e-57	1.83354e-55	0.560291	0.84954	0.73699	0.651293
Srm	64	9.24018e-50	2.39278e-48	0.380207	0.505268	0.915248	0.481175
Tk1	64	6.54683e-40	1.18535e-38	0.484876	0.4544	0.489814	0.495032
Bcas2	65	1.06108e-68	5.25119e-67	0.658058	1.26468	0.0980425	0.182508
Mrpl12	65	3.49468e-47	8.2356e-46	0.80873	1.08229	0.842901	0.825043
Mrpl14	66	1.23306e-54	4.00879e-53	0.854562	0.786339	0.252864	0.752944
Top2a	66	1.29073e-44	2.77725e-43	0.780599	0.669767	0.742229	0.72383
Plp2	67	2.40199e-54	7.53413e-53	0.890522	0.473442	0.215395	0.254435
Rpa3	67	5.26e-46	1.18924e-44	0.532743	0.712041	0.569278	0.620128
Paics	68	1.27867e-66	6.05872e-65	0.914535	1.19718	0.704519	0.415743
Nop56	68	1.46647e-48	3.60866e-47	0.470571	0.658886	0.870983	0.486741
Psme2	69	3.64954e-53	1.06941e-51	0.934779	0.445477	0.336621	0.629871
Lsm3	69	2.66437e-48	6.48475e-47	0.563423	0.80139	0.828769	0.721531
Pa2g4	69	5.06079e-47	1.174e-45	0.805077	1.07097	0.897465	0.822651
Acadl	70	9.60913e-66	4.50517e-64	0.475857	1.04384	0.15448	0.220615
Psat1	70	1.25068e-60	4.9737e-59	0.58904	0.752371	0.662592	0.573627
Tpi1	70	4.59444e-57	1.63709e-55	0.644894	1.39194	1.02724	0.64992
Vamp8	70	4.33975e-53	1.26335e-51	0.984781	1.18921	-0.717225	-0.000418082
Mt2	71	5.36735e-53	1.54233e-51	1.42951	0.339111	1.29781	-0.186703
Cenpa	71	2.85157e-42	5.67004e-41	0.812012	0.675451	0.768766	0.770129
Krt15	72	8.27778e-53	2.36341e-51	1.14892	1.35344	0.570869	-0.405945
Tpd52	73	1.36814e-64	5.91623e-63	0.59606	0.769504	0.00340167	0.263147
Lsm5	73	4.26455e-47	9.997e-46	0.691457	0.825492	0.794108	0.719864
Pbk	73	5.51181e-39	9.81985e-38	0.448574	0.39484	0.409708	0.437498
Phgdh	74	9.26703e-64	3.96878e-62	0.313994	0.936285	0.668408	0.65083
Isyna1	74	5.6278e-52	1.57535e-50	0.85938	0.979031	0.886532	0.645985
Serpine2	74	4.49035e-47	1.04712e-45	0.344388	-1.83868	1.28257	-0.308293
Snrpd3	74	4.26604e-37	7.11646e-36	0.5548	0.754784	0.784585	0.805018
Hnrnpa1	77	1.14658e-46	2.63241e-45	-0.0722234	1.1565	1.05069	0.528179
Arl4c	78	9.25215e-61	3.74628e-59	0.598126	0.930341	0.303648	-0.29709
Ptn	79	1.1374e-60	4.56395e-59	-1.52158	1.69185	1.19803	0.15181
Krt17	79	1.81061e-54	5.76032e-53	1.40667	1.72293	0.294124	-1.14878
Igfbp4	79	8.41854e-46	1.88423e-44	-0.769943	-1.0706	0.846116	-0.0437881
Mki67	80	7.89356e-35	1.18377e-33	0.45684	0.428836	0.446426	0.462668
Tmem97	81	5.57547e-41	1.06125e-39	0.409225	0.318967	0.530899	0.498508
Psmb8	82	2.76691e-50	7.29221e-49	0.936503	0.70864	-0.472955	0.318644
Fkbp1a	82	2.36958e-43	4.95498e-42	0.333329	-0.622309	0.868496	0.635219
Lsm7	82	4.87547e-34	7.14321e-33	0.505339	0.640333	0.631324	0.697924
Ndufa11	83	5.13318e-50	1.33703e-48	0.939387	0.886225	0.672906	0.76813
Cenpw	83	8.54347e-34	1.24355e-32	0.56246	0.449546	0.540568	0.537002
Espn	84	1.05008e-56	3.64934e-55	0.632072	0.772859	0.486184	0.409796
Rfc3	84	1.84988e-52	5.248e-51	0.542708	0.728134	0.615471	0.505341
Ssbp1	84	1.80175e-47	4.29145e-46	0.527203	0.779227	0.380198	0.634957
Zfp266	85	2.32987e-58	8.79428e-57	-0.400661	1.02624	0.263894	-0.183235
Anapc11	85	1.13117e-33	1.64111e-32	0.246902	-0.00831998	0.654187	0.709441
Spata7	86	7.34405e-58	2.70334e-56	0.718006	1.40698	1.03842	0.837968
Cenpf	86	4.13115e-35	6.36684e-34	0.595938	0.544459	0.553231	0.589286
Pycard	87	3.28246e-49	8.21353e-48	0.708091	0.823994	0.335276	0.233274
Hmgb3	88	1.59647e-57	5.73443e-56	0.706988	0.821418	0.674107	0.637118
Rangrf	89	2.70479e-50	7.1709e-49	0.733844	0.849479	0.542812	0.626472
Myb	90	2.65907e-47	6.29974e-46	0.522449	0.595036	0.451174	0.169766
Klc3	94	2.54857e-55	8.66514e-54	0.295738	0.582432	-0.152397	-0.141847
Nolc1	94	7.1197e-41	1.34941e-39	0.496913	0.724925	0.806793	0.439385
Ndufa12	94	2.69821e-30	3.47337e-29	0.447071	0.135708	0.504273	0.713152
Mapk13	95	7.92466e-55	2.59533e-53	0.425237	0.576555	0.0655066	0.095332
Idh3g	95	3.83875e-46	8.72336e-45	0.740284	0.937063	0.551437	0.586962
Serpinh1	95	1.84434e-40	3.42279e-39	-1.42142	-2.27039	0.969279	-0.251168
Cdc42ep3	96	1.32705e-54	4.28311e-53	0.455154	1.07836	0.235029	-0.0324193
Anxa3	97	1.54899e-54	4.96346e-53	0.389583	0.961607	-0.159699	0.387645
1190005I06Rik	97	2.85155e-50	7.47107e-49	0.585387	0.716691	0.566499	0.467087
Rrm2	97	3.38776e-40	6.23516e-39	0.461135	0.513256	0.565557	0.459485
Tpx2	97	7.79227e-30	9.85987e-29	0.353757	0.352648	0.380925	0.393915
Rbp1	98	1.1373e-39	2.04256e-38	0.41207	1.05322	1.22283	0.33793
Ccnb2	98	7.28667e-35	1.09645e-33	0.491247	0.338394	0.428998	0.448268
Phb	99	6.74936e-30	8.56457e-29	0.448136	0.494931	0.624918	0.612294
Ccna2	100	4.32875e-33	6.12071e-32	0.423413	0.32069	0.357074	0.38424
Lad1	101	1.1799e-53	3.55087e-52	0.485034	0.626447	-0.0786082	-0.0194161
Mdh1	101	9.21359e-45	2.01163e-43	0.867009	1.00264	0.583937	0.551061
Mad2l1	101	6.12191e-31	8.09109e-30	0.355605	0.32294	0.346257	0.356301
Ly6d	102	1.50441e-53	4.49706e-52	1.23016	1.59455	-0.958897	-0.562601
Hmmr	102	4.00454e-29	4.90006e-28	0.368072	0.30248	0.358954	0.375385
Mrpl51	103	1.87171e-53	5.55774e-52	0.615998	1.07895	0.579646	0.615561
Tacc3	103	4.29623e-29	5.24258e-28	0.340359	0.326188	0.334533	0.344108
Plpp2	104	2.08637e-53	6.15411e-52	0.443538	0.811885	-0.0589297	0.347233
Knstrn	105	4.39841e-35	6.75535e-34	0.467368	0.43689	0.44249	0.443506
Lockd	106	2.11897e-36	3.41953e-35	0.547371	0.504068	0.485036	0.504536
Gpsm3	107	1.11369e-43	2.3398e-42	0.508984	0.313666	0.130926	0.208136
Cacybp	107	2.49769e-39	4.46776e-38	0.567661	1.034	0.873459	0.419007
Ebna1bp2	107	9.07287e-37	1.48024e-35	0.543519	0.575967	0.652186	0.60488
Ruvbl1	108	2.44959e-38	4.2619e-37	0.135884	0.767318	0.667253	0.4452
Hddc2	108	6.57541e-37	1.0847e-35	0.463862	0.700735	0.3331	0.551794
Pin1	109	5.65911e-52	1.57535e-50	0.00594689	1.22231	0.882023	0.643331
Prim1	109	1.84825e-29	2.30591e-28	0.369859	0.384012	0.369788	0.372944
4931406C07Rik	110	5.82835e-51	1.56382e-49	0.26404	0.987036	0.493504	0.433237
Dkc1	110	9.58671e-44	2.02366e-42	0.545675	0.697924	0.605944	0.513574
Capg	110	2.38482e-42	4.80061e-41	0.928845	-0.00561055	-0.0288988	0.200917
Plekhb1	111	8.42961e-51	2.24823e-49	0.208503	0.619436	0.218806	-0.0297273
Itpa	111	4.70205e-27	5.35625e-26	0.385935	0.360306	0.430533	0.45562
Ubl4a	112	4.71488e-42	9.33336e-41	0.725276	0.574795	0.498486	0.528862
Psme1	114	6.59954e-42	1.30063e-40	0.777658	0.863901	0.00922196	0.432543
Cenpe	114	2.81121e-31	3.80582e-30	0.428792	0.435555	0.443386	0.433848
Wdr12	115	1.24483e-49	3.18648e-48	0.496211	0.707167	0.408284	0.349
Uqcc2	115	9.10063e-32	1.23958e-30	0.695381	0.560881	0.513863	0.725478
Polr2j	116	1.93659e-46	4.42336e-45	0.586405	0.967114	0.70574	0.664594
Phlda3	116	1.23573e-36	2.00874e-35	-0.229156	-0.141867	0.85366	-0.930828
Cdh1	117	1.97531e-49	4.99888e-48	0.375759	0.502105	-0.290636	0.00233174
Pla2g7	117	1.83181e-41	3.54733e-40	0.799532	0.76142	0.401557	-0.411334
Cdc20	117	2.34749e-29	2.90436e-28	0.556709	0.464353	0.527003	0.512926
Gm10260	118	1.99282e-49	5.0147e-48	0.817084	1.24038	0.303369	0.21575
Jup	118	2.61229e-41	5.03686e-40	0.67284	0.706989	-0.121877	-0.249564
Eif4ebp1	118	5.24032e-26	5.76306e-25	0.36452	0.463077	0.621318	0.65462
Irx5	119	1.20215e-48	2.97464e-47	0.553496	0.748249	0.380533	-0.0281619
H2afx	119	1.09732e-35	1.72702e-34	0.435717	0.324471	0.615868	0.452377
Cct5	120	2.0855e-48	5.10376e-47	0.163148	1.24466	0.787705	0.545221
Fst	120	1.17631e-35	1.84482e-34	0.908883	0.564762	1.0147	-0.315079
Eno1	121	2.99866e-48	7.25872e-47	0.876745	1.40562	0.882378	0.796106
Mrpl33	121	2.86036e-25	3.04786e-24	0.504328	0.111875	0.346839	0.638493
Hmgn5	122	1.80159e-40	3.35745e-39	0.672034	0.696787	0.360069	0.491377
Rrm1	122	2.43318e-35	3.78929e-34	0.441171	0.399821	0.474613	0.428206
Wfdc12	123	4.20018e-48	1.01122e-46	0.846388	1.07084	0.0461218	0.298875
Ly6e	123	2.99073e-40	5.52727e-39	0.989727	1.18433	-0.843473	0.296225
Rbp4	124	5.1523e-40	9.40505e-39	0.709482	0.806289	0.486838	0.10684
Cdkn2d	124	6.7456e-35	1.01847e-33	-0.0943082	0.565508	0.638367	-0.0914874
Ndufc1	125	7.31136e-25	7.53815e-24	0.512301	0.233737	0.470119	0.635673
Nap1l1	126	1.32222e-33	1.90587e-32	0.263878	0.499962	0.846784	0.654874
Bmp7	127	2.39276e-42	4.80061e-41	0.401565	0.533241	0.493538	0.181309
Fam111a	127	1.91268e-27	2.21275e-26	0.260063	0.155637	0.328585	0.313846
Tkt	128	2.01963e-35	3.1563e-34	0.494573	0.88359	0.221182	0.656024
Ppic	128	1.73092e-33	2.47894e-32	-0.801388	-2.27299	0.572189	-0.0723624
Mrps21	129	1.67711e-24	1.69001e-23	0.420093	0.25863	0.215322	0.606336
Pigyl	130	1.11073e-46	2.56331e-45	0.171651	0.797441	0.0140558	0.389191
Polr2i	130	1.39324e-38	2.45276e-37	0.600701	0.443669	0.493142	0.471417
Shcbp1	130	1.58887e-30	2.08142e-29	0.327422	0.318747	0.31163	0.308181
Fdps	131	4.40184e-24	4.36655e-23	0.516789	0.374433	0.332611	0.554396
Park7	132	9.71152e-45	2.11e-43	0.728623	1.12308	0.621051	0.649018
Prkg2	132	5.63336e-33	7.91513e-32	-0.140411	0.154465	0.662932	0.0687239
Nol7	133	1.57488e-38	2.76161e-37	0.637564	0.839556	0.475162	0.615716
Clcn3	133	4.51684e-38	7.7377e-37	0.348275	0.393162	-0.100118	0.0873026
Aqp5	134	3.65039e-41	6.97804e-40	0.902216	1.0708	0.27083	0.52682
Ccnd2	134	6.18423e-32	8.50141e-31	-1.72537	-0.676108	0.885183	-0.336248
Racgap1	134	2.14563e-28	2.54844e-27	0.38741	0.342486	0.352469	0.351963
Cdk6	135	7.22929e-38	1.22431e-36	0.48916	0.448021	0.334797	0.152354
Aes	135	7.66262e-24	7.46812e-23	0.0755583	0.306241	0.332491	0.60872
Lrrfip1	136	7.04885e-46	1.58564e-44	0.614445	1.07988	-0.0229173	-0.143175
Sgo2a	136	1.70779e-28	2.05027e-27	0.342796	0.342255	0.311466	0.327702
Krt79	137	7.09497e-39	1.25401e-37	0.539766	0.645138	0.0907178	0.118895
Ly6k	138	3.00807e-45	6.63265e-44	-0.4702	0.915917	-0.14171	-0.319659
Nuf2	138	1.4325e-23	1.37805e-22	0.224115	0.183036	0.190346	0.210473
Akr1b8	139	2.51743e-37	4.21527e-36	0.403838	-0.0266393	0.315813	0.234056
Pdpn	139	5.8868e-31	7.80352e-30	-0.41111	0.160323	0.500392	-0.290331
Wnt10a	140	5.80488e-45	1.27364e-43	0.654129	0.841306	0.636844	-0.325057
Dsg2	140	5.78145e-43	1.2033e-41	0.369119	0.455525	-0.0470077	0.10765
Nop58	141	1.72442e-34	2.55169e-33	0.283734	1.06875	0.841861	0.318659
Galk1	141	3.77768e-25	3.96835e-24	0.512666	0.441515	0.411355	0.524816
Batf	142	4.56367e-37	7.58455e-36	0.499901	0.516082	0.387472	0.129732
Pttg1	143	1.87096e-30	2.42953e-29	0.618591	0.521332	0.627379	0.560228
Sox10	144	1.23374e-44	2.6675e-43	0.1684	0.542268	0.153822	0.0475831
Avpi1	144	1.89526e-36	3.06963e-35	0.531071	0.567201	0.0799925	0.173383
Atad2	144	4.17089e-30	5.35365e-29	0.0831691	0.450134	0.461954	0.316207
Stxbp2	146	2.38979e-44	5.11738e-43	0.267123	0.400748	-0.0876875	0.0704628
Irx1	147	2.96498e-44	6.28859e-43	-0.0544323	0.657193	-0.0401422	-0.10635
Ppan	148	1.88376e-42	3.84875e-41	-0.258047	0.982141	0.714627	0.198677
Ndc80	148	1.29338e-25	1.40163e-24	0.251901	0.236991	0.255409	0.252769
Prc1	149	3.8352e-36	6.1446e-35	0.470028	0.3872	0.370689	0.365
Etfb	149	2.57015e-24	2.56095e-23	0.494171	0.207149	0.361795	0.515561
Col11a1	150	1.48991e-29	1.87459e-28	-0.708071	-0.932073	0.560772	-0.0151905
Ckap2l	150	4.54941e-23	4.24802e-22	0.246548	0.230812	0.212065	0.245005
Ifrd2	151	1.9916e-29	2.47782e-28	0.386516	0.401398	0.371236	0.352241
Gm11361	153	7.84548e-43	1.62529e-41	0.690662	1.05529	0.483396	0.380576
Hist1h2ae	153	2.95693e-35	4.57297e-34	0.435095	0.425418	0.396371	0.357441
Ccnb1	153	2.16631e-27	2.49967e-26	0.412072	0.326701	0.367024	0.356061
Cxadr	154	8.62686e-43	1.77889e-41	0.423644	0.533483	-0.467903	-0.0379312
Ddx18	155	1.33265e-42	2.7353e-41	0.558284	0.798413	0.562962	0.480149
Syngr2	156	6.94885e-24	6.80223e-23	0.489914	0.455947	0.112978	0.478557
Srsf3	157	1.34869e-32	1.87137e-31	0.764593	0.842048	0.778998	0.590856
Hist1h2ap	157	3.78255e-29	4.64117e-28	0.517502	0.549623	0.519358	0.500673
Sostdc1	158	2.30156e-42	4.68089e-41	0.670625	0.889199	0.553592	0.187587
H2afj	158	5.44281e-21	4.68903e-20	0.504426	0.29249	0.318695	0.661633
Aldh1a1	159	5.04204e-35	7.71727e-34	0.500471	0.564049	0.413988	0.349457
Cep55	159	6.39992e-24	6.27869e-23	0.217936	0.19841	0.201906	0.2061
Gsta4	160	2.80811e-42	5.60866e-41	0.429181	0.835176	0.259128	0.317938
Hspa4l	160	6.71637e-35	1.01751e-33	0.468168	0.487363	0.297831	0.0392601
Cbx3	160	4.52396e-33	6.3765e-32	0.372191	0.709586	0.601513	0.449606
St14	161	6.99173e-42	1.37186e-40	0.492162	0.638469	-0.796133	0.142357
Vars	161	1.24431e-20	1.05164e-19	0.302253	0.328641	0.274723	0.331585
Taldo1	162	8.24102e-21	7.01826e-20	0.546551	0.610107	0.0199223	0.569801
Chmp4c	163	1.60326e-41	3.1183e-40	0.232025	0.41545	-0.135022	0.0247193
Sec61b	163	3.59333e-28	4.22288e-27	0.190454	0.0137363	0.735237	0.648971
Sumo3	163	4.98112e-27	5.65967e-26	0.3716	0.455874	0.581907	0.519559
Itga6	164	2.72488e-41	5.23131e-40	0.312189	0.573956	0.0282187	-0.460948
Usp1	164	2.64576e-36	4.25422e-35	0.489316	0.584998	0.491605	0.394308
Ckmt1	166	7.16816e-41	1.35284e-39	0.32379	0.438545	-0.238638	0.0924453
Fam96a	166	1.71527e-25	1.84092e-24	0.416826	0.293264	0.328811	0.376831
Nrg1	167	9.00152e-41	1.69168e-39	0.392937	0.592385	0.466251	-0.0451151
Anp32a	168	4.98037e-20	4.08519e-19	0.292224	0.540363	0.310773	0.500164
Aplp2	169	1.59015e-40	2.97585e-39	-0.295948	1.13982	-0.161653	-0.486604
Ehf	169	2.41143e-37	4.05302e-36	0.479619	0.600992	-0.370357	0.34784
Mthfd2	169	5.45307e-28	6.39157e-27	0.198878	0.305168	0.4692	0.292117
Selenof	169	6.64685e-20	5.41226e-19	-0.257563	-1.02237	0.503587	0.571632
Eva1a	170	4.09577e-40	7.50723e-39	0.260996	0.518794	0.226192	-0.00110915
Cdt1	170	5.5875e-28	6.53195e-27	0.225715	0.353645	0.377503	0.29283
Ncapg	170	1.25549e-23	1.213e-22	0.216477	0.195767	0.195965	0.198993
Pcna	171	6.84412e-28	7.98003e-27	0.41145	0.473078	0.566121	0.360353
Parp2	171	5.04804e-23	4.69394e-22	0.300737	0.299034	0.254184	0.294285
Itgb4	172	6.09442e-40	1.10794e-38	0.346254	0.44684	0.0752235	-0.0725406
Atox1	172	5.91172e-34	8.63305e-33	0.74991	0.448386	0.356039	0.556995
Sept7	173	1.04652e-27	1.21386e-26	-1.45229	0.684979	0.883908	0.295181
Denr	173	1.58392e-25	1.70406e-24	0.358982	0.721481	0.40897	0.578164
Atp6v1c2	175	1.01705e-32	1.42452e-31	0.389036	0.45177	-0.0524343	0.0721615
Tacstd2	177	1.0714e-34	1.60135e-33	0.569219	0.681145	-1.06806	-0.154976
Tipin	177	1.08894e-25	1.18296e-24	0.226999	0.252402	0.352759	0.3183
Krt5	178	1.71585e-32	2.37342e-31	0.655328	0.758879	0.624916	-0.58961
Mt1	179	1.68851e-29	2.11848e-28	0.904853	-0.45925	0.956519	-0.677773
Tcf19	179	3.87938e-20	3.19386e-19	0.220613	0.231729	0.221652	0.227607
Bspry	180	7.06623e-37	1.16136e-35	0.300299	0.380493	-0.100817	0.275419
Sox9	181	2.0915e-38	3.65316e-37	-0.171477	0.710057	-0.266716	-0.0944005
Krtcap3	181	1.28919e-37	2.17503e-36	0.303906	0.3783	-0.0990052	0.0637578
Cavin3	181	3.72137e-27	4.26093e-26	-0.292437	-0.683558	0.551217	0.177911
Pgp	181	7.02912e-25	7.28086e-24	0.468946	0.569727	0.411681	0.444542
Lsm8	182	3.09559e-25	3.2828e-24	0.55456	0.597662	0.542061	0.51006
Asns	183	3.41975e-38	5.92667e-37	0.352082	0.582267	0.356679	0.296853
Nusap1	183	6.28521e-19	4.84331e-18	0.245506	0.216593	0.232353	0.254553
Gnl3	184	6.69941e-27	7.59266e-26	-0.327122	0.367037	0.731265	-0.0745681
Nfib	185	3.56044e-38	6.1466e-37	-0.350222	0.851994	-0.0144677	0.0897949
Oaf	185	1.06021e-26	1.19852e-25	-1.1567	-0.975429	0.523571	-0.331763
Cdca5	185	6.09049e-24	5.98831e-23	0.233266	0.231739	0.230642	0.221089
Ss18l2	186	3.69538e-38	6.35492e-37	0.331364	0.700659	0.369322	0.358496
Cenps	186	2.04981e-19	1.61877e-18	0.224126	0.184453	0.195121	0.227953
Fermt1	187	6.02354e-38	1.02793e-36	0.315073	0.425202	0.0959177	0.0297313
Mbp	188	6.13964e-38	1.04374e-36	0.072188	0.447344	0.153319	-0.0451382
Fscn1	188	1.84186e-26	2.06641e-25	-0.674142	-0.0335091	0.528728	-0.488188
Mgst2	189	5.24295e-36	8.34004e-35	0.338895	0.414477	0.152383	0.0128441
Hnrnpm	189	3.57169e-33	5.06634e-32	0.537985	0.777522	0.556281	0.551435
Gpx7	190	2.29105e-26	2.55747e-25	-0.115711	-1.02147	0.394431	0.148776
Zmat2	190	8.98103e-21	7.61933e-20	0.44443	0.556571	0.358152	0.479105
Xrcc5	191	4.53836e-36	7.2451e-35	0.356229	0.495105	0.408278	0.0673899
Barx2	191	2.89263e-35	4.48913e-34	0.282467	0.664125	-0.0846258	0.465604
Bcam	191	1.6538e-30	2.16013e-29	0.332253	0.285126	0.171098	-0.230683
Col9a1	192	4.94704e-37	8.19113e-36	0.187641	0.609986	0.332438	0.216116
Tma16	192	1.30536e-34	1.94451e-33	0.450547	0.63231	0.481086	0.368332
Cystm1	192	2.44409e-30	3.15536e-29	0.663983	0.885603	-0.420024	0.140843
Incenp	192	4.04978e-26	4.487e-25	0.317369	0.323945	0.310223	0.28817
Dynlt1a	194	1.13968e-19	9.12975e-19	0.204056	0.211651	0.172595	0.214133
Cdcp1	195	8.76791e-37	1.43574e-35	0.284998	0.365614	-0.144948	-0.174399
Ckap2	195	7.66679e-26	8.36958e-25	0.301384	0.274394	0.316192	0.237032
Pmm1	196	6.50464e-30	8.30134e-29	0.537416	0.573243	0.211349	0.283721
Esco2	196	4.24249e-21	3.68344e-20	0.22381	0.192426	0.186713	0.214898
Cmas	197	3.3213e-29	4.08648e-28	0.426306	0.565637	0.0142882	0.422653
S100a4	197	1.06484e-25	1.15961e-24	-1.08215	-1.23875	0.805444	0.104822
Rwdd1	199	4.30756e-23	4.03913e-22	0.0003312	0.175981	0.559721	0.536102
Tinagl1	200	1.72341e-29	2.1562e-28	0.570666	0.326505	0.313381	-0.114632
Ybx3	200	5.05876e-23	4.6941e-22	-0.0351677	0.0947494	0.547393	0.515778
Mtf2	201	6.20758e-36	9.83934e-35	0.116392	0.565998	0.231799	0.14724
Bex3	201	2.01884e-29	2.50471e-28	0.462622	0.810799	0.575641	0.544618
Abhd11	202	7.34125e-36	1.1595e-34	0.347797	0.734405	0.00936632	0.367805
Ska1	202	3.59512e-19	2.80432e-18	0.171379	0.14084	0.14382	0.158549
Tmed1	204	2.92792e-25	3.1124e-24	-0.961759	0.669987	0.613507	0.14356
Aurkb	205	1.59132e-20	1.33731e-19	0.209824	0.156896	0.158256	0.179982
Cdc25c	206	1.14705e-16	8.02032e-16	0.187184	0.151562	0.161351	0.178785
Hbs1l	207	5.59194e-35	8.52962e-34	0.389216	0.638027	0.245089	0.0397459
Shisa2	208	6.32735e-35	9.61843e-34	0.28265	0.418995	0.236212	0.193576
Pcbd2	208	1.24673e-16	8.67294e-16	0.187412	-0.217795	0.110013	0.302368
Actn4	209	5.6792e-29	6.89241e-28	0.62559	0.604666	-0.0357801	0.227901
Trim28	209	6.32444e-25	6.56621e-24	0.358182	0.518183	0.50673	0.330773
Pkp3	210	6.62419e-29	8.01743e-28	0.295572	0.335435	-0.0902026	-0.0897795
Rpn2	210	1.03981e-24	1.05738e-23	0.298837	-0.133395	0.567182	0.490785
Dtl	211	1.59152e-24	1.61041e-23	0.279944	0.301058	0.298299	0.166927
Cbx5	211	2.93079e-16	1.9899e-15	0.0645734	0.359863	0.341192	0.352248
Mdfi	212	1.37056e-34	2.03483e-33	0.215732	0.608073	-0.0023131	-0.258671
Txnl4a	213	2.17452e-23	2.07394e-22	0.54878	0.719848	0.501787	0.537082
Emid1	214	3.16751e-24	3.14913e-23	-0.270564	0.397918	0.571455	0.0620931
Kif11	214	5.59861e-16	3.73297e-15	0.164547	0.141385	0.148524	0.162584
Tnnt2	215	2.97678e-34	4.39026e-33	0.362441	0.474169	0.0535022	0.0718181
Psmb10	215	2.33245e-28	2.76296e-27	0.421703	0.173566	0.212725	0.321128
Pole	215	5.41013e-16	3.61813e-15	0.135138	0.136153	0.124933	0.139382
Chordc1	216	3.76299e-34	5.53147e-33	-0.396631	0.67569	0.151187	-0.118227
Gpx1	216	2.54592e-28	3.00783e-27	0.733457	0.70466	0.412992	0.37001
Elf5	216	6.84059e-17	4.85159e-16	0.227744	0.323515	-0.35322	0.290027
Kif22	217	1.77655e-24	1.78618e-23	0.255161	0.215339	0.245473	0.224488
Ppa1	218	5.0406e-24	4.97802e-23	0.497046	0.441064	0.600557	0.502453
Irx2	219	1.2439e-33	1.79881e-32	0.005976	0.466396	0.00839854	-0.108112
Knl1	219	4.82677e-21	4.17445e-20	0.215867	0.20503	0.200323	0.198077
Sox4	220	1.53351e-33	2.2033e-32	0.236122	0.967084	0.0434442	0.086696
Hist1h1b	220	2.55276e-20	2.11338e-19	0.289818	0.298345	0.298278	0.279316
Rcn3	221	2.3315e-23	2.21418e-22	-0.689891	-2.38	0.391529	-0.309719
Alad	221	1.22465e-15	8.00967e-15	0.138557	-0.204912	0.111218	0.293705
Trps1	222	2.16855e-33	3.09574e-32	-0.256634	0.637051	-0.254406	-0.0257856
Irx3	222	9.33201e-28	1.08524e-26	0.476948	0.563395	-0.0315278	-0.0737109
Prdx6	223	1.7827e-28	2.12873e-27	0.654107	0.885545	0.504429	0.388232
Hist1h1e	223	7.21862e-24	7.05082e-23	0.461952	0.544102	0.447842	0.419961
Tfap2c	224	2.82909e-33	4.0258e-32	0.224216	0.377619	0.115033	0.0398665
Cycs	227	6.90389e-23	6.35329e-22	0.314594	0.557628	0.664476	0.483336
Kif20a	227	1.69489e-18	1.29265e-17	0.247703	0.220025	0.220187	0.224147
H2-D1	228	3.53781e-27	4.06118e-26	0.851069	-1.01077	-1.09688	-0.307316
Klf5	229	1.04489e-32	1.45891e-31	0.400903	0.787067	0.091355	-0.213131
H1fx	229	1.39219e-22	1.27327e-21	0.103236	0.317049	0.34712	0.244671
Chmp6	229	2.46455e-15	1.59783e-14	0.133388	0.156402	0.162849	0.263331
Sorbs2	230	1.11537e-32	1.55245e-31	0.220741	0.373802	-0.121294	0.152851
Plk4	230	2.7477e-22	2.49252e-21	0.240309	0.201814	0.259892	0.224837
Ccnd1	230	3.5161e-15	2.25984e-14	0.309016	0.473699	0.08637	0.490257
Alyref	231	3.77115e-22	3.40014e-21	0.373597	0.40956	0.456208	0.348073
Fabp7	231	5.11212e-17	3.64894e-16	0.0947281	0.326174	0.271089	0.292878
Ldhb	232	3.62454e-32	4.99805e-31	0.0287953	0.970284	0.365756	-0.00625086
Pir	233	8.39887e-32	1.1475e-30	0.375189	0.467266	0.18928	0.0149971
Rangap1	234	1.82415e-26	2.05171e-25	0.389272	0.540948	0.398994	0.403672
Ezr	235	6.99583e-32	9.58751e-31	0.622788	0.879066	-0.549323	-0.299976
H2-K1	236	3.29179e-26	3.65627e-25	0.769788	-0.387171	-0.816202	-0.134348
Rpa2	236	2.08295e-21	1.84076e-20	0.332176	0.328695	0.352931	0.306569
Slc9a3r1	237	1.27882e-31	1.73654e-30	0.35748	0.59741	-0.240083	0.0933883
Ppp1r14c	237	1.46874e-30	1.92973e-29	0.263453	0.324444	0.20346	0.0894935
Sec11c	238	1.1038e-14	6.92442e-14	0.216584	0.225182	0.0334237	0.411235
Cuedc2	239	2.29916e-21	2.02782e-20	0.110014	0.335585	0.475755	0.0894025
Sema3b	240	2.5897e-21	2.25725e-20	0.137882	0.31488	0.320345	0.193264
Chadl	241	3.18299e-31	4.29607e-30	0.00634137	0.355474	0.107692	-0.216918
Arl6ip1	241	4.51771e-26	4.99302e-25	0.655368	0.294757	0.289269	0.323545
Bambi	241	4.72324e-26	5.20726e-25	-0.336848	0.821118	0.638282	-0.0046997
Clmn	242	3.30892e-31	4.45255e-30	0.247972	0.340461	-0.0171477	0.0670951
Impdh2	242	3.89406e-21	3.38753e-20	0.342041	0.487473	0.631453	0.422018
Them6	242	3.98876e-19	3.10051e-18	0.161367	0.222284	0.208433	0.210788
0610040J01Rik	243	2.64989e-25	2.83036e-24	0.184175	0.248798	-0.0157632	0.193636
Chchd4	243	4.96563e-23	4.62697e-22	0.0224978	0.542458	0.450661	0.300748
Cep295	244	3.34738e-31	4.49073e-30	0.110039	0.49408	0.313774	0.245296
Col4a2	244	6.48528e-21	5.56559e-20	-1.79474	-2.90042	0.561338	-0.286528
Acsl3	245	4.30806e-31	5.7622e-30	0.0328301	0.725378	0.0712957	-0.304008
Tufm	245	1.04907e-21	9.36384e-21	0.356938	0.373398	0.353331	0.21708
Aldoc	246	4.60031e-31	6.13466e-30	0.194089	0.583447	-0.128133	0.0624486
C1qtnf12	246	1.34083e-25	1.44953e-24	0.500685	0.35323	0.447741	0.0126285
Luc7l3	246	7.17748e-25	7.41728e-24	0.308711	0.689665	0.19961	0.432594
Guca1a	247	5.85545e-31	7.78513e-30	0.0948687	0.337577	-0.0193012	0.0904259
Dyrk3	247	1.19119e-30	1.56969e-29	0.326849	0.401431	0.243845	0.125585
Cit	247	3.84229e-14	2.34754e-13	0.14133	0.148153	0.143236	0.155223
Lmo4	248	1.333e-20	1.12447e-19	-0.144014	0.502388	0.603751	0.359778
Wnt6	249	1.38253e-20	1.16404e-19	0.023739	0.310949	0.310211	-0.224426
Ddt	249	5.24228e-14	3.17243e-13	0.299703	0.314066	0.0519542	0.321166
Basp1	250	5.7365e-25	5.96971e-24	0.474097	0.0695019	-0.254822	0.208138
Panx1	250	1.72574e-20	1.44754e-19	-0.537687	0.112173	0.331759	0.0181154
Rrs1	251	3.47486e-25	3.67625e-24	0.0023791	0.566315	0.467397	0.16635
Tspan7	252	1.68029e-30	2.1883e-29	-0.126554	0.423372	0.166505	0.155702
Fbln7	252	2.32715e-20	1.93379e-19	-0.364313	-0.198007	0.218139	-0.01083
Smox	253	1.95556e-30	2.532e-29	0.111616	0.652663	0.136147	-0.125983
Acer2	253	7.46767e-25	7.66382e-24	0.259401	0.246703	0.0547866	0.122203
Dlk1	253	2.45952e-20	2.03998e-19	0.476978	0.414192	0.547031	0.156131
Aldh1a7	253	1.76146e-16	1.21637e-15	0.159658	0.207877	0.178174	0.183238
Metrn	254	3.43826e-20	2.83593e-19	0.0691405	0.180113	0.2885	0.235803
Nup37	255	6.13134e-21	5.27201e-20	0.224075	0.238915	0.212172	0.201233
Retreg1	256	5.8444e-30	7.48016e-29	-0.045367	0.326518	-0.161675	-0.143832
Arhgef5	257	6.53857e-30	8.3208e-29	0.200614	0.362481	-0.217129	-0.0415911
Cd109	257	7.73807e-20	6.2893e-19	-0.274379	-0.403084	0.340208	-0.226174
Kif23	257	1.75063e-13	1.0355e-12	0.215421	0.242689	0.216548	0.242862
Urah	258	1.5945e-24	1.61041e-23	0.313385	0.376771	-0.172691	-0.269526
Dynll2	258	1.24817e-16	8.67294e-16	0.475071	0.50691	0.362048	0.412603
Mrpl9	259	1.30309e-29	1.64418e-28	0.263464	0.443942	0.0650266	0.210821
Bola1	259	2.52995e-24	2.52654e-23	0.361111	0.441155	0.23483	0.32033
Hsp90b1	259	1.49149e-19	1.18626e-18	-0.132708	-0.786319	0.590372	0.360271
Tmem40	260	2.21388e-26	2.47755e-25	0.229986	0.287469	-0.0566269	0.0100776
Vps26b	260	4.68999e-25	4.89209e-24	-0.133057	0.401359	0.31308	0.161466
Topbp1	260	1.10755e-18	8.50525e-18	0.300592	0.2952	0.295086	0.263591
Twist1	261	2.2738e-19	1.78931e-18	-0.559644	0.184565	0.383046	-0.0392805
Alcam	262	2.53378e-29	3.12616e-28	0.242541	0.401613	-0.251315	-0.110538
Rcn1	262	2.3064e-19	1.81177e-18	-0.0510923	-0.559868	0.484004	0.259475
Ankrd10	263	2.40753e-19	1.88788e-18	0.215026	0.437865	0.375853	-0.0298179
Kif2c	263	3.44807e-13	1.98677e-12	0.146881	0.113807	0.119518	0.132592
Acaa2	264	3.66251e-19	2.85189e-18	0.413064	0.383268	0.0697518	0.393726
Auts2	265	4.56997e-29	5.56138e-28	-0.379963	0.753791	0.0220796	-0.450602
Aurka	265	1.98166e-19	1.56773e-18	0.23733	0.196318	0.187196	0.184077
Klk8	266	7.70906e-21	6.60311e-20	0.112605	0.489101	0.414188	-0.112363
Mnd1	266	4.32774e-13	2.46809e-12	0.185595	-0.200401	0.178398	0.198434
Cav2	267	9.00186e-29	1.08657e-27	0.0640317	0.333401	0.192523	0.0508864
Cdk2ap1	268	1.10611e-28	1.33152e-27	0.257721	0.612382	0.4866	0.249311
Kdelr2	268	4.74958e-19	3.67907e-18	-0.224521	-0.382289	0.50264	0.0484305
Esrp1	269	3.13081e-23	2.95437e-22	0.247365	0.276466	-0.0232606	0.049831
Krtcap2	269	8.75247e-13	4.86686e-12	-0.119799	-0.385918	0.356836	0.504401
Palmd	270	1.78055e-28	2.12873e-27	0.293528	0.37482	0.0511897	0.12315
mt-Nd3	272	2.00777e-28	2.39107e-27	0.0396224	0.986579	0.208848	0.0255751
Id4	272	1.68504e-18	1.28733e-17	0.0609424	0.506449	0.506522	-0.206381
Gpi1	273	5.24969e-23	4.85106e-22	0.467646	0.368497	0.273059	0.0714037
Rgs10	273	2.25551e-18	1.71434e-17	0.220431	0.0800074	0.414863	0.0634327
Slc43a3	273	3.05e-12	1.63474e-11	0.105415	0.0662933	0.152438	0.167066
Mettl26	274	8.08528e-25	8.27858e-24	0.373182	0.490177	-0.0960259	0.239258
Nop2	275	3.66636e-18	2.76311e-17	0.00442598	0.317363	0.332689	0.156966
Jrkl	276	3.49683e-28	4.12034e-27	0.0720411	0.327244	0.00445715	0.00748618
Nasp	276	4.05472e-18	3.05063e-17	0.281407	0.498822	0.477996	0.372355
Myl12b	276	4.4683e-17	3.19965e-16	0.170545	0.577908	0.122223	0.414996
Snx5	280	8.42039e-18	6.25074e-17	0.348836	0.374647	0.385189	0.280686
Ncapd2	280	1.86835e-14	1.15739e-13	0.19444	0.17813	0.144155	0.178511
Efna1	281	3.47791e-27	4.00275e-26	0.156395	0.436752	-0.0931231	-0.187514
Pltp	281	8.97041e-18	6.63691e-17	-0.188913	0.0935805	0.27623	-0.511881
Id2	282	4.46262e-27	5.09654e-26	-0.258747	0.892863	0.227181	-0.189479
Gipc1	282	1.89321e-12	1.02833e-11	0.219749	0.165998	0.149789	0.207241
Bub3	284	1.13044e-17	8.33603e-17	0.308875	0.270275	0.399652	0.299774
Stk39	284	1.37763e-11	7.1682e-11	0.025401	0.284525	0.234009	0.264556
Nav2	285	1.08358e-26	1.22184e-25	-0.158645	0.345942	-0.0166504	-0.1721
Asrgl1	286	1.58353e-15	1.03417e-14	0.152904	0.285762	0.0458785	0.225679
Ociad2	287	2.34683e-21	2.0617e-20	0.304562	0.348896	0.0437851	0.0937884
Noc2l	287	2.48728e-12	1.3412e-11	0.238258	0.244122	0.15595	0.221179
Chchd10	288	2.57611e-21	2.2498e-20	0.541205	0.658884	-0.470957	0.281663
Ddit4	288	1.50523e-17	1.1045e-16	0.372369	0.237846	0.48265	0.0656023
Nsdhl	290	2.96101e-13	1.71723e-12	0.18224	0.0517089	0.113058	0.154573
Bcl2	291	3.20856e-26	3.57273e-25	0.173535	0.386619	0.194063	0.162951
Odc1	291	2.55384e-17	1.85257e-16	-0.341022	0.342066	0.6314	-0.867009
Anapc13	292	8.42862e-11	4.23714e-10	0.301972	-0.0302262	0.0988236	0.335536
Srrt	293	4.12627e-17	2.96426e-16	0.240358	0.454462	0.382271	0.241381
Cited4	295	5.4341e-26	5.96145e-25	0.353481	0.45311	-0.167547	0.286393
Sulf2	295	3.74129e-23	3.51555e-22	0.262029	0.330304	0.0458832	0.150633
2310039H08Rik	295	1.13561e-10	5.66408e-10	0.214809	0.302425	0.24035	0.283196
Prkcsh	296	6.06203e-26	6.63398e-25	-0.296461	0.817835	0.37283	0.250033
Ggct	298	1.35512e-25	1.46143e-24	0.331933	0.421009	0.178022	0.0547422
Psmb9	298	1.22954e-20	1.04113e-19	0.339374	0.301968	-0.0829471	0.261992
Cox17	299	7.86234e-13	4.40489e-12	0.304601	0.101124	0.0103572	0.312791
Gcnt1	301	1.74423e-25	1.86751e-24	0.19779	0.300668	0.170173	0.100848
Igfbp3	301	1.19306e-16	8.31597e-16	-1.69412	0.361122	0.463948	-0.894864
Krt19	302	3.65311e-23	3.43995e-22	0.543437	0.679288	-1.56661	0.38874
Tpm2	302	1.3585e-16	9.41021e-16	0.233852	-1.22993	0.476391	-0.447904
Fbln2	304	1.7949e-16	1.23754e-15	-2.09706	-0.943491	0.465582	-0.324801
Pdrg1	305	5.78814e-10	2.79917e-09	-0.0437599	0.273489	0.229787	0.294818
Lamb3	306	3.60811e-25	3.80818e-24	0.18305	0.269907	-0.0520175	-0.225072
Selenow	306	2.10673e-16	1.44805e-15	-0.488529	-0.685975	0.580855	0.170436
Ccdc90b	306	9.6725e-10	4.57825e-09	0.125534	0.0953794	0.09908	0.157232
Gin1	307	3.73457e-25	3.93233e-24	0.221068	0.298499	0.10063	0.0854888
Plekha7	307	5.29978e-20	4.33123e-19	0.173757	0.188361	0.0857516	0.100216
Ltbp1	307	1.15275e-16	8.04756e-16	0.201697	0.268318	-0.00480051	0.207977
Col4a1	307	4.62644e-16	3.10802e-15	-2.0648	-2.82678	0.549397	-0.163002
Plscr1	308	3.9418e-25	4.131e-24	0.145947	0.448128	0.017462	0.0671511
Gm266	308	2.27998e-18	1.72999e-17	0.0325602	0.324743	0.176577	0.237263
Sesn3	309	4.23662e-25	4.42956e-24	-0.717422	0.670202	0.32905	-0.28132
Gas1	309	5.17668e-16	3.46721e-15	-0.596271	-0.381218	0.341708	-0.218881
3110009E18Rik	309	3.16647e-13	1.82924e-12	0.112813	0.170546	0.0827733	0.136791
Dpy19l1	310	5.45195e-16	3.64063e-15	-0.146865	0.191875	0.281408	0.116567
Wfdc3	310	2.52903e-09	1.17092e-08	0.102376	0.239017	-0.677622	0.226556
Irf6	311	7.76675e-20	6.30111e-19	0.194725	0.237914	-0.0699314	-0.0325918
Hras	311	5.63879e-16	3.75413e-15	0.343324	0.108408	0.430632	0.00105469
Cnn3	312	9.07016e-16	5.97611e-15	-0.101133	-0.0806851	0.510658	0.287296
Blm	312	3.78736e-09	1.73549e-08	0.0612463	0.0541478	0.0597807	0.0668982
Emp3	313	9.17306e-16	6.02608e-15	-1.28939	-1.87465	0.448337	-0.465137
Cpe	314	1.09333e-15	7.17187e-15	0.393313	0.163332	0.507934	-0.00766275
Fam60a	315	7.35273e-25	7.56329e-24	0.216317	0.328898	0.249595	0.175585
Rbp7	315	4.40014e-16	2.96046e-15	0.239527	0.202243	0.177448	0.19746
Pcbp4	316	1.93164e-15	1.25782e-14	0.0351082	0.201439	0.354663	0.200963
Nek2	316	5.20056e-12	2.77405e-11	0.112885	0.0911169	0.0944677	0.09818
Mpzl2	317	8.62347e-25	8.80939e-24	0.190419	0.25215	0.0398532	0.0699659
Tnfrsf18	317	5.24572e-20	4.29494e-19	0.226976	0.27288	0.243427	0.0440627
Nfe2l3	318	8.73347e-25	8.90135e-24	0.190158	0.252532	-0.183242	0.0403995
Atp1a1	319	1.35807e-24	1.37787e-23	-0.0586383	0.808976	-0.582199	-0.562634
Reep4	319	2.08871e-19	1.64657e-18	0.255697	0.212862	0.152044	0.137972
Eif1b	319	3.5041e-15	2.25538e-14	-0.119546	-0.58882	0.267738	0.134748
Alg3	319	1.15063e-08	5.15065e-08	0.0909	0.00291634	0.09721	0.120144
Cd14	321	1.88268e-24	1.88862e-23	0.231755	0.557647	-0.845477	0.0622162
Cpne8	321	2.052e-24	2.05384e-23	-0.0984955	0.460433	0.350524	-0.172729
F11r	322	1.83849e-23	1.76099e-22	0.37611	0.504701	-0.303419	-0.181793
Fam89a	324	8.06653e-21	6.88282e-20	0.173221	0.262325	0.209864	-0.111321
Lgals3	326	5.21175e-19	4.02308e-18	0.780885	0.536713	-1.22397	-0.0367779
Spdl1	326	5.92907e-12	3.14757e-11	0.126893	0.125026	0.0846517	0.119812
Igfbp5	327	4.54092e-24	4.4945e-23	-0.741563	0.85624	-0.341763	-1.79999
Pdgfrl	327	1.71066e-14	1.06415e-13	-0.743926	-1.08925	0.199645	-0.0942249
Pglyrp1	328	5.35092e-24	5.27279e-23	0.265742	0.38004	-0.241215	0.191218
Cav1	328	1.7209e-14	1.06902e-13	-0.186151	0.0988284	0.298024	-0.0630337
Chek1	328	3.68841e-14	2.25662e-13	0.127534	0.106446	0.117846	0.10371
Il23a	329	1.80881e-18	1.37717e-17	0.182389	0.210812	-0.0499856	-0.202845
Dsp	330	2.54654e-18	1.92568e-17	0.238145	0.209046	0.0858079	-0.0385082
Atp1b1	331	1.00658e-23	9.78887e-23	0.323404	0.514759	-1.27486	0.236748
Gps2	332	2.81271e-12	1.5112e-11	0.225677	0.26656	0.0292967	0.196497
Rif1	334	1.11695e-23	1.08386e-22	0.222793	0.399498	0.226703	0.191425
Krt23	334	8.43655e-13	4.70293e-12	0.162585	0.195398	-0.213293	0.147221
Gata3	335	1.13219e-23	1.09625e-22	0.0868736	0.283762	-0.0741389	-0.0885629
Gk	335	1.1862e-22	1.08934e-21	0.219329	0.274319	-0.0319525	0.0626843
Lpar3	335	1.72715e-17	1.26318e-16	0.170212	0.191192	0.178166	-0.0390447
Mars	335	9.44807e-08	3.95505e-07	0.0885333	0.107142	0.0969531	0.138345
Gm45589	336	1.29576e-23	1.2492e-22	0.146295	0.246647	0.0476383	0.0753729
Cgn	336	3.39737e-17	2.45648e-16	0.149691	0.197377	-0.388302	0.130244
Dusp6	337	1.68911e-23	1.6214e-22	-0.532702	0.738683	0.247984	-0.520581
Cyba	337	1.16733e-07	4.84555e-07	-0.246408	-0.454931	-0.314086	0.35599
Ndufaf2	338	1.28607e-07	5.31367e-07	0.172814	0.0447391	0.176969	0.235398
Lypd3	339	1.96905e-23	1.882e-22	0.261295	0.349729	-0.414112	-0.496594
Hist1h2ak	339	4.88139e-08	2.08055e-07	0.0712096	0.0714754	0.0488458	0.0707
Msmo1	340	1.24078e-17	9.13462e-17	0.377292	0.44503	0.126611	0.0352865
Podxl	340	6.69111e-11	3.37511e-10	0.0845242	0.0609399	-0.0129574	0.0758951
Mfsd13a	341	2.26981e-23	2.1602e-22	0.0398297	0.23818	0.111997	0.0258469
Pimreg	341	6.8879e-11	3.46652e-10	0.139973	0.1175	0.128607	0.117819
Plb1	342	2.45642e-23	2.32785e-22	0.275704	0.370708	-0.312862	0.171618
Fignl1	342	1.09485e-09	5.16573e-09	0.0815938	0.0823732	0.0648699	0.073477
Snrpb2	343	3.32896e-18	2.51308e-17	0.255808	0.536432	0.376609	0.330903
Psmd4	344	1.20892e-19	9.64969e-19	0.529448	0.70309	-0.114051	0.288254
Sh3bgrl3	344	1.22729e-13	7.34721e-13	-0.0957777	-1.34498	0.4385	0.241716
Cisd3	344	1.53848e-07	6.29237e-07	0.164538	0.0198213	0.131669	0.197795
1500011K16Rik	345	2.1336e-17	1.55278e-16	0.277654	0.212551	0.080145	0.179751
Csrp2	345	1.24917e-13	7.46821e-13	-0.69667	-0.939596	0.434748	0.111629
Large2	346	2.86331e-23	2.70768e-22	0.163881	0.211576	0.0663826	-0.0953006
Cdkn1c	346	1.30764e-13	7.79682e-13	-0.298707	0.0547438	0.319649	-0.134009
Cdk5rap2	346	1.84284e-07	7.46183e-07	0.0701634	0.082284	0.117146	0.117319
Col17a1	347	5.42379e-22	4.88031e-21	0.175816	0.234704	0.180254	-0.222755
Pura	347	2.66839e-17	1.93252e-16	0.307304	-0.0017347	-0.0152727	0.145781
Bid	347	3.72392e-17	2.68387e-16	0.0735068	0.251915	0.12349	0.160595
Pdia6	348	1.43487e-13	8.53259e-13	-0.229032	-0.442341	0.476654	0.137216
Ctsb	349	1.51328e-13	8.98689e-13	0.162038	-0.498183	0.554002	-0.209536
1110008P14Rik	349	2.24429e-07	9.02986e-07	-0.169084	0.0428934	-0.0363243	0.256387
Faim2	350	3.43786e-17	2.48172e-16	0.166559	0.184731	0.0632077	0.11417
Snx1	350	2.39589e-07	9.61378e-07	0.16267	0.0820316	0.152292	0.176663
Crlf1	351	1.63232e-13	9.668e-13	-0.114546	-1.66245	0.258038	-0.0437489
Slfn9	351	2.63857e-09	1.22037e-08	0.111769	0.0792985	0.10979	0.103142
Icam1	352	4.41349e-23	4.12977e-22	-2.06978	0.889279	0.410081	-1.29365
Snhg18	352	1.81043e-13	1.06945e-12	-0.352877	-0.515194	0.356973	-0.0317498
4930523C07Rik	354	5.16266e-23	4.78056e-22	-0.0548414	0.710132	-0.184898	-0.585413
Gjb1	354	1.15207e-11	6.02269e-11	0.127064	0.174987	0.0828055	0.143738
Chl1	355	5.27316e-23	4.86266e-22	0.0923826	0.347755	0.233189	-0.184228
Lurap1l	355	6.01804e-17	4.28184e-16	0.239293	0.25628	-0.148906	-0.0565242
Timm8a1	355	2.44952e-13	1.43744e-12	0.327892	0.351967	0.452357	0.287075
Shtn1	356	6.60962e-22	5.93534e-21	0.155455	0.207169	-0.0979113	0.0528416
Srsf7	356	2.88041e-13	1.67704e-12	0.23596	0.429587	0.489379	0.0801251
Lrrc59	357	3.45928e-13	1.99065e-12	0.345343	0.199353	0.392831	0.325076
Tsc22d4	358	1.21768e-22	1.11595e-21	-0.513245	0.523961	0.00755493	-0.0879132
Tagln2	358	7.97348e-17	5.63712e-16	0.661963	0.0127736	0.494266	0.0615064
Slbp	358	3.08445e-13	1.78417e-12	0.10453	0.275994	0.416042	0.0152849
Tdrkh	359	6.1686e-07	2.37262e-06	0.0294962	0.0416145	-0.0109636	0.0692833
Knop1	360	1.03595e-16	7.28926e-16	0.355076	0.39325	0.278538	0.215256
1500009L16Rik	360	3.78432e-13	2.16929e-12	-0.27187	-0.164891	0.162486	0.0456719
Ptprz1	361	1.80537e-22	1.64777e-21	0.133213	0.211945	-0.0173318	0.0874188
Tuba1a	361	4.64138e-13	2.63682e-12	-2.04574	-1.96805	0.577826	-0.612342
Il17re	362	1.82082e-22	1.65848e-21	0.107276	0.235815	-0.152914	-0.0436678
Tnk1	362	8.48173e-18	6.28579e-17	0.14517	0.176337	-0.14001	-0.0697156
Wfdc18	362	2.72762e-14	1.67801e-13	0.269632	0.696284	-2.01735	0.445659
Gnai2	362	4.72255e-13	2.67952e-12	-0.402558	-0.737822	0.44134	0.117612
Rassf4	363	2.44073e-22	2.21857e-21	-0.149883	0.222711	-0.175194	-0.0396612
Rac3	363	1.08442e-16	7.59433e-16	0.238743	0.25539	0.00626175	0.0953556
Map7	364	2.87744e-22	2.6049e-21	0.181081	0.270571	-0.295786	-0.0361875
Idh2	364	1.004e-06	3.77687e-06	0.192399	0.323267	0.179774	0.319759
Rbm47	365	3.17657e-22	2.86987e-21	0.101652	0.184271	-0.124179	-0.0522323
Plod1	365	5.57008e-13	3.14438e-12	-0.518837	-0.449526	0.195614	-0.0628529
Larp7	365	4.00655e-11	2.03712e-10	0.273893	0.321577	0.292899	0.244997
Fbp1	367	1.47922e-18	1.13204e-17	0.180262	0.217268	0.0117601	0.056881
Tgfbi	367	7.3945e-13	4.148e-12	-0.504492	-0.030367	0.222014	-0.148778
Psrc1	368	2.24024e-16	1.53744e-15	0.228803	0.21921	0.206319	0.15723
Vps72	368	3.19448e-15	2.05908e-14	0.304421	0.397906	-0.0659624	0.249793
Gclm	368	8.19801e-13	4.58718e-12	0.24713	0.270409	0.288307	0.10981
Lamb1	369	8.43203e-13	4.70293e-12	-0.707995	-1.36567	0.212354	-0.108995
Supt4a	370	7.18497e-22	6.43901e-21	0.358081	0.610603	0.215535	0.170699
Eif3e	370	7.75771e-21	6.63203e-20	-0.269606	0.765325	0.536719	0.133844
Cpm	370	2.6394e-16	1.80029e-15	0.29631	0.333931	0.0653935	-0.243818
Mthfd1l	370	4.75656e-09	2.16623e-08	0.0645608	0.0444279	0.0861232	0.0848907
Gmps	371	3.02403e-16	2.04697e-15	0.319611	0.361451	0.288019	0.199122
G6pc3	371	1.45762e-06	5.40119e-06	-0.000106023	0.00482184	0.11713	0.150847
Yap1	372	1.04393e-21	9.33664e-21	-0.838684	0.536122	0.153746	-0.157407
Pinx1	372	1.51993e-06	5.61807e-06	0.0647923	0.104889	0.0550915	0.102061
Cdc42se1	373	1.07561e-21	9.5815e-21	0.120568	0.621298	-0.130858	-0.028688
Snai2	373	1.46568e-12	8.02971e-12	0.0111125	0.107618	0.155419	-0.138666
Sapcd2	373	2.00737e-10	9.87939e-10	0.112937	0.124954	0.117831	0.107478
Atrx	374	1.51361e-21	1.34563e-20	0.308776	0.716856	0.0787943	-0.0380737
Axl	374	1.533e-12	8.37789e-12	-0.353444	-0.727782	0.21022	-0.110986
Lcn2	375	1.7934e-21	1.5912e-20	0.084006	0.952177	-1.20065	-0.212024
Hp	375	1.14193e-14	7.15352e-14	0.392864	0.592181	-1.32783	0.373268
Ptpn18	376	2.00158e-21	1.77237e-20	0.214735	0.362233	-0.287554	0.154748
Rpf2	376	2.46215e-13	1.44295e-12	0.198338	0.276472	0.270314	0.192984
Eif1ax	376	1.71843e-12	9.36826e-12	0.269822	0.334751	0.478093	0.346898
Areg	377	4.78175e-16	3.20752e-15	0.509016	0.449763	0.255756	-0.0410035
Lamc1	377	1.72478e-12	9.39141e-12	-0.35416	-0.550061	0.30181	-0.00825977
Cavin2	378	2.31828e-21	2.04063e-20	-0.0879362	0.371094	0.194409	0.037652
Shisa8	378	9.41554e-20	7.56982e-19	-0.0111233	0.243871	0.200525	0.0827901
Rabl2	378	2.53178e-06	9.21288e-06	0.0564158	0.082667	0.0203108	0.0900489
Casp1	379	2.36155e-21	2.07054e-20	-0.601377	0.430725	0.0396707	0.0163399
Golim4	379	6.46812e-14	3.90366e-13	0.369785	0.52129	0.445882	-0.0802021
2510002D24Rik	380	2.3759e-21	2.07903e-20	0.168974	0.26372	0.048359	0.102644
Cldn4	381	7.35904e-15	4.66247e-14	0.281245	0.42799	-1.77604	0.264889
Mgst3	382	8.81524e-16	5.81675e-15	0.348964	0.0744739	-0.0751789	0.0977095
Hspg2	382	2.73971e-12	1.47553e-11	-0.266531	-0.660618	0.180517	-0.0342912
Syne4	382	1.78881e-08	7.88848e-08	0.090203	0.112112	-0.167026	0.089191
2010111I01Rik	383	4.58135e-21	3.96991e-20	-0.462651	0.668617	0.409263	-0.291727
Ckap5	383	4.27291e-13	2.43994e-12	0.237713	0.18211	0.200378	0.179146
Smyd2	383	2.7811e-12	1.49602e-11	0.171559	0.335556	0.301786	0.196356
Fam181b	384	6.44755e-16	4.27979e-15	0.115168	0.183226	0.15455	0.124624
Myl9	384	3.55315e-12	1.89985e-11	-0.621265	-0.776014	0.25106	-0.374132
Krcc1	385	5.38774e-21	4.65058e-20	0.21354	0.53159	0.0257627	0.230552
Prr7	385	4.14349e-12	2.21284e-11	-0.0581378	-0.00807672	0.198744	-0.00793286
Prdx4	385	2.35267e-08	1.02935e-07	0.112398	-0.592757	0.398768	0.324807
Creg1	386	9.20073e-10	4.37821e-09	0.320445	-0.059382	0.246382	0.271055
Cep89	387	8.81177e-09	3.95641e-08	0.108324	0.120023	0.0436931	0.100797
Eml3	388	3.46731e-06	1.24544e-05	0.0606564	0.0940654	-0.0558917	0.108955
Tgm2	389	6.46594e-12	3.42441e-11	0.142406	-0.167661	0.192883	0.180933
Plscr2	389	2.63217e-06	9.56253e-06	0.0678484	0.107839	-0.121279	0.102769
Matn4	390	8.39932e-21	7.13942e-20	-0.151358	0.321725	0.146152	-0.285166
Scube3	390	1.76436e-15	1.15058e-14	0.129982	0.14519	0.0726823	-0.0380743
Col18a1	390	7.04362e-12	3.72592e-11	0.0387267	-0.861602	0.224301	-0.049197
Creld2	390	2.99378e-08	1.29711e-07	-0.0347591	0.0597005	0.234585	0.207112
Maf	391	7.76617e-12	4.10327e-11	-0.0307128	-0.128514	0.149618	-0.192674
Aldh1a3	391	3.76946e-06	1.35287e-05	0.0319502	0.158372	-0.134463	0.167769
Ass1	392	7.94203e-12	4.19121e-11	0.130887	0.0578945	0.325629	0.112379
Gne	392	4.012e-06	1.43299e-05	0.0529621	0.0688045	-0.034818	0.0767716
Hif1a	393	8.50389e-12	4.48241e-11	0.0396514	-0.244341	0.275831	-0.191553
Bik	393	4.49762e-06	1.59748e-05	0.0684939	0.0713433	-0.30094	0.0798269
Ifi27	394	6.18429e-15	3.93488e-14	0.523428	-0.545415	0.165621	-0.294987
Slpi	395	1.85024e-20	1.54906e-19	0.286039	0.825403	-0.822667	-1.16731
Dpm3	395	5.01311e-06	1.76369e-05	-0.0715589	-0.384592	0.0787264	0.199203
Il17b	396	1.98632e-20	1.65986e-19	0.13159	0.444352	0.205812	-0.168859
Trim29	396	1.3917e-16	9.62522e-16	0.197841	0.234014	0.0537023	-0.19854
Oat	396	1.00861e-11	5.29134e-11	0.218762	-0.247246	0.344095	0.0863033
Scarb1	397	2.08175e-20	1.73635e-19	-0.150727	0.364162	0.126652	0.0897778
S100g	397	3.99799e-15	2.56217e-14	0.354356	0.423785	-0.0391704	-0.0688235
Fam110c	398	2.31006e-20	1.92318e-19	0.158729	0.214916	-0.0249249	-0.0760392
Snhg20	399	2.49037e-06	9.08443e-06	0.0780886	0.204024	0.044644	0.164154
Kri1	400	2.89468e-20	2.392e-19	-0.0599063	0.284279	0.0942329	0.100528
Frat2	400	1.75635e-14	1.08953e-13	0.237319	0.0743834	0.0586423	0.0641142
Slc39a10	400	1.8182e-11	9.40563e-11	-0.110693	0.09178	0.214738	-0.0294571
Anxa1	400	7.35797e-06	2.54247e-05	-0.142084	-1.61618	-1.41421	0.40672
Gjb3	402	2.45838e-18	1.86218e-17	0.148813	0.1791	0.117469	-0.0180396
Ppib	402	1.95656e-11	1.01096e-10	-0.457919	-1.63983	0.426036	0.085597
Gde1	402	7.90558e-06	2.72324e-05	0.106357	0.199531	-0.0497971	0.21085
Krt16	403	2.40214e-14	1.48393e-13	0.403027	0.469693	0.0179748	-0.731167
Tnfaip8	403	2.25934e-11	1.16337e-10	-0.124857	0.289809	0.241701	-0.0600162
Cldn10	403	7.10396e-07	2.71364e-06	0.144645	0.182887	-0.307722	0.147534
Pthlh	404	4.14001e-20	3.40214e-19	0.191612	0.29687	0.130494	-0.115429
St6galnac2	404	6.9249e-18	5.15778e-17	0.131354	0.320341	0.134406	0.189364
Ddx24	404	2.56776e-14	1.58405e-13	0.361018	0.305031	0.131306	0.0439077
Bex1	405	7.31136e-19	5.62432e-18	0.309175	0.375571	0.0741987	0.158314
Cytl1	405	1.23409e-11	6.43634e-11	-2.28583	0.498373	0.429032	-0.0469082
Hist1h1a	405	2.06375e-11	1.06512e-10	0.105296	0.123182	0.106312	0.0907775
Trim35	406	2.77051e-11	1.42328e-10	-0.271892	-0.440905	0.232809	-0.0956173
Ttf2	406	5.81554e-07	2.24069e-06	0.0655803	0.0713538	0.0597514	0.0654155
Gja1	407	2.92663e-11	1.50175e-10	-0.0437802	0.132623	0.348197	-0.183389
Paip2b	408	5.95132e-20	4.85479e-19	0.136316	0.279497	0.0406784	0.0642753
Acot7	408	3.48995e-14	2.14108e-13	0.280593	-0.0326337	0.0952254	0.172012
Fam178b	408	1.60962e-13	9.54626e-13	0.197337	0.199434	0.164017	0.172443
Vps13a	409	7.87265e-20	6.37541e-19	0.158413	0.369601	0.00102668	0.131451
Rsl24d1	409	3.05256e-11	1.56457e-10	0.149565	0.257773	0.292148	0.170885
5730559C18Rik	410	8.00242e-20	6.46874e-19	0.154124	0.235617	0.0370536	-0.0687337
Fgfr2	411	8.68075e-20	7.00436e-19	0.0699112	0.223342	0.111953	-0.151198
Moxd1	411	2.37678e-16	1.62365e-15	0.140933	0.20012	0.170671	-0.175626
Mien1	411	4.66335e-14	2.82978e-13	0.397505	0.413657	-0.119676	0.247415
Erbb3	412	9.21021e-20	7.41813e-19	0.0878874	0.197307	-0.0821634	0.0394831
Ppp1r1b	412	6.95623e-16	4.60372e-15	0.142884	0.166763	-0.0184985	0.0989756
Fkbp10	412	3.63276e-11	1.85342e-10	-0.346624	-0.846101	0.223347	0.0683867
Tspo	412	1.05156e-06	3.93915e-06	0.339144	0.00438975	0.118642	0.333932
Muc15	413	3.86291e-09	1.76647e-08	0.0751095	0.12603	-0.157622	0.096522
Col2a1	414	1.05197e-19	8.44228e-19	-0.0745872	0.477419	0.164825	-0.0381797
Macc1	414	8.01339e-14	4.82319e-13	0.122476	0.140125	-0.0337565	0.0566284
Polrmt	414	1.26322e-05	4.25273e-05	-0.000578206	0.0530751	0.0181256	0.0591824
Fam83g	415	1.18201e-19	9.45182e-19	0.0518686	0.226987	0.0151028	-0.251585
Cdc7	415	6.32124e-06	2.20131e-05	0.0731937	0.0735096	0.0733425	0.0610986
Siah1b	416	1.45135e-07	5.94692e-07	0.0780703	0.0746016	0.0900179	0.0873159
Efhd2	417	1.22421e-19	9.75428e-19	0.219917	0.654428	-0.0939556	-0.472043
Car2	417	2.72452e-11	1.40127e-10	0.225826	0.262969	-0.165286	0.181008
Bmyc	418	5.38674e-11	2.72642e-10	-0.0873456	0.128405	0.173835	0.11182
Cyb5a	418	1.61518e-05	5.39282e-05	0.164362	-0.837687	-0.230644	0.210064
mt-Atp8	419	1.72554e-19	1.36997e-18	0.211178	0.585681	0.0676313	0.213532
Gm16136	419	1.15869e-14	7.24829e-14	0.143894	0.172805	-0.0150993	0.0887591
Mmachc	419	1.62932e-05	5.43596e-05	0.0290169	0.0186392	0.00184459	0.0386092
Pkp4	420	1.91224e-19	1.5155e-18	0.136558	0.286216	0.0508997	-0.0322337
Rnf181	420	1.89277e-13	1.11661e-12	0.267214	0.250996	0.0410604	0.1124
Tsen34	420	6.76196e-11	3.40699e-10	0.00780053	-0.10569	0.332165	0.232015
Marveld3	421	2.13124e-13	1.25397e-12	0.106715	0.119698	-0.159154	0.0538026
Pkp1	422	5.45814e-18	4.07895e-17	0.159772	0.202019	-0.133985	-0.0916671
Etv4	422	1.00154e-10	5.01785e-10	-0.0734125	-0.0645609	0.18697	0.109541
Thrsp	422	6.40581e-06	2.22902e-05	0.0742351	0.0913017	0.0487783	0.095058
Ripk4	423	2.98814e-19	2.33905e-18	0.127324	0.168482	-0.0571973	-0.000803004
Noxo1	423	4.41571e-19	3.42641e-18	0.153037	0.210903	-0.0534264	0.079735
Trp63	423	5.77989e-13	3.25869e-12	0.133815	0.156911	0.155794	-0.185557
Ankrd49	424	3.51216e-19	2.74441e-18	-0.179969	0.340558	0.0877366	0.0733648
Rrm2b	424	9.63935e-15	6.07266e-14	0.124463	0.26691	0.212298	0.0971278
Lbr	425	1.75837e-05	5.8446e-05	0.144626	0.101814	0.119942	0.122727
Olfr1369-ps1	426	4.08549e-14	2.4893e-13	0.122286	0.151262	0.0911516	0.0911299
Egr4	426	4.46034e-13	2.54046e-12	0.190612	0.194661	0.190054	0.0625699
Plet1	427	5.06187e-19	3.91416e-18	0.440963	0.722526	-1.78182	-0.348321
Met	427	2.02009e-13	1.19014e-12	0.121647	0.141341	-0.0793115	0.0362926
Dstn	428	3.57814e-13	2.05374e-12	0.432317	0.315425	-0.219606	-0.0815977
Ramp1	430	4.25885e-13	2.43503e-12	0.397424	-0.863866	0.31553	-0.295579
Vwa1	430	1.45575e-10	7.24461e-10	0.146248	0.127786	0.160085	-0.219598
Nsg1	431	1.52676e-10	7.58104e-10	0.0359675	-0.0136717	0.092955	0.0209221
Clu	433	1.11704e-18	8.56333e-18	-0.0771148	0.419509	-1.11941	0.0255461
Rflnb	433	1.57853e-10	7.82064e-10	0.179322	0.247317	0.262833	0.0305625
Ddah1	433	3.42464e-05	0.000110532	-0.0234365	-0.195583	0.0314661	0.0509549
Tyw5	434	4.57e-13	2.59959e-12	0.169978	0.197611	0.107666	0.107319
Aebp1	434	1.63339e-10	8.07449e-10	-1.12888	-1.95222	0.292157	-0.223394
Tmem54	435	2.97757e-16	2.01859e-15	0.124693	0.169099	0.0699893	0.0993237
Ucp2	435	5.37275e-13	3.03683e-12	0.347264	0.407407	0.284588	0.113482
Il18r1	436	2.35847e-16	1.61362e-15	0.13414	0.168517	0.0232093	0.0302807
Serpinf1	436	1.92723e-10	9.50595e-10	-1.60369	-3.29269	0.304472	-0.0949694
Espl1	436	8.67988e-08	3.64032e-07	0.0477212	0.0588933	0.0342003	0.0490021
Cdipt	438	6.82973e-13	3.84086e-12	0.237128	0.15462	0.196356	0.0564273
Tspan3	438	3.39102e-10	1.65428e-09	-0.417409	-0.476039	0.324085	-0.05099
Ydjc	438	9.41638e-10	4.47605e-09	0.113389	0.160955	0.151834	0.107616
Mbnl1	439	3.41562e-10	1.66264e-09	0.213808	0.175435	0.289704	0.0306228
Trmt2a	439	2.96712e-06	1.07269e-05	0.0685867	0.112797	0.0474815	0.0859433
Chn2	440	4.45147e-05	0.000142332	-0.185276	0.055432	-0.119107	0.0906705
Hspa1a	441	8.47601e-13	4.71902e-12	0.605569	-1.33405	-0.450153	-0.540751
Gstt3	442	1.03483e-12	5.72565e-12	0.125868	0.151002	-0.0731802	0.0690014
Ankle1	442	7.76953e-07	2.95017e-06	0.0613823	0.0485474	0.0590959	0.0458248
H1f0	443	1.32747e-11	6.91529e-11	0.320167	0.45048	0.213363	0.276116
Pianp	443	4.7608e-10	2.31239e-09	-0.177158	-0.529196	0.178623	-0.0874309
Serinc2	444	1.25838e-12	6.93665e-12	0.120945	0.128433	-0.0916653	-0.0873244
Msrb1	445	1.41853e-12	7.78094e-12	0.268779	0.190336	0.0174778	0.0719128
Cpsf1	445	1.00139e-11	5.26585e-11	0.115802	0.167583	0.0771182	0.111247
Sult2b1	447	4.48782e-18	3.37079e-17	0.163239	0.223596	-0.233451	0.051833
Hoxb2	447	2.12536e-12	1.15162e-11	0.151769	0.0710331	0.0562939	0.0616411
Slc29a1	447	5.01611e-05	0.000159584	-0.696592	-0.893516	0.200285	0.209966
Amotl1	449	4.79612e-18	3.59628e-17	-0.75305	0.603678	0.309916	-0.252881
Elf3	449	8.31814e-17	5.87147e-16	0.170651	0.229036	-0.500718	0.0579645
Mphosph8	449	3.92064e-11	1.99572e-10	0.153121	0.354769	0.276293	-0.00954035
Epb41l4aos	450	4.85859e-18	3.637e-17	-0.0208195	0.442398	-0.199554	-0.0767382
Cotl1	451	7.39795e-10	3.5507e-09	-0.00593243	-1.10787	0.333044	-0.000355841
Pkp2	451	1.77677e-08	7.85091e-08	0.0836465	0.0743059	-0.182043	0.0690917
mt-Nd4l	452	6.7596e-18	5.04309e-17	0.0875044	0.654833	0.10279	0.165837
Itga1	452	7.43448e-10	3.56439e-09	-0.0694935	-0.666468	0.0993871	0.0454239
Nrarp	452	5.40107e-05	0.000170976	0.0511994	-0.00849345	0.0197481	0.0646146
Cracr2b	453	9.60298e-12	5.05575e-11	0.178615	0.233335	-0.263027	0.131484
Angptl2	453	8.75684e-10	4.18487e-09	0.0235945	-0.751905	0.148252	0.0979084
Tpd52l1	455	2.26835e-16	1.55434e-15	-0.0628622	0.236797	0.133286	0.136816
Krt6a	455	5.90858e-14	3.57081e-13	0.324456	0.409525	-0.145553	-0.190745
Pcdh18	455	9.56476e-10	4.5369e-09	-0.0439771	0.0598506	0.136603	-0.0398021
Chd3	456	4.24944e-13	2.43277e-12	0.260332	0.325143	-0.0650802	0.0308844
Ticrr	456	2.74774e-08	1.19516e-07	0.061411	0.0534193	0.050932	0.0523098
Trim33	457	8.38934e-18	6.23809e-17	0.0757256	0.316872	-0.0595777	0.000767068
D6Wsu163e	457	5.91968e-05	0.000186466	0.0117281	0.0168245	0.0122634	0.0387976
Slc1a3	458	1.0963e-09	5.16709e-09	-0.871158	0.169024	0.224081	-0.0560675
Gabpb2	459	5.86891e-12	3.11934e-11	0.176576	0.196815	-0.0881508	0.0242953
Ccdc88a	459	1.2605e-09	5.90976e-09	-0.0415787	0.0543207	0.280548	0.0492156
Mboat1	459	1.24807e-08	5.57563e-08	0.0465465	0.0694699	-0.0641097	0.0505135
Tgfa	460	1.04319e-17	7.70541e-17	0.0642661	0.187608	0.137508	-0.0315813
Ddx21	460	1.27113e-09	5.95333e-09	-0.329264	-0.0135896	0.3852	0.0920712
Tpm1	461	1.60277e-09	7.48297e-09	-0.224923	0.139697	0.436344	0.104867
Car12	462	1.40517e-17	1.03278e-16	0.10203	0.215189	0.101559	0.0307355
Scd2	462	3.38749e-05	0.000109412	0.0925759	0.125488	0.157643	0.150882
Elovl7	463	1.53409e-17	1.12382e-16	0.0410597	0.150803	-0.186003	0.0339705
Gale	463	2.90884e-08	1.26264e-07	0.100127	0.123366	0.0284267	0.0825134
Rhov	464	6.23079e-08	2.63551e-07	0.0881679	0.127351	-0.339756	0.0952767
Amn	465	2.799e-09	1.29189e-08	-0.0943872	-0.452813	0.0928356	0.0038439
Reep6	465	7.48629e-05	0.000233174	0.0212677	0.0350927	-0.0309654	0.0443633
Bnipl	466	1.98938e-17	1.45257e-16	0.148797	0.204649	-0.214011	-0.0258616
Dll1	466	7.70155e-10	3.68846e-09	0.0698181	0.102956	0.0855769	-0.0426498
Hacd1	466	6.11907e-05	0.000192474	-0.149495	-0.13493	0.202454	0.17379
Rem2	467	2.12363e-17	1.54806e-16	0.0931794	0.202903	-0.00523844	-0.21969
Sema3c	467	3.13911e-09	1.44438e-08	0.00138258	0.134729	0.12509	-0.0544603
Dhcr7	467	7.92304e-05	0.000245405	0.069986	0.0748165	0.050714	0.0997987
Plppr4	468	2.23169e-17	1.62152e-16	0.121453	0.167748	0.0566046	0.0619715
Tnfsf9	468	3.43304e-09	1.57799e-08	-0.0252255	-0.312646	0.145791	-0.099092
Eif2b3	468	4.49895e-05	0.000143747	0.114403	0.0621565	0.134648	0.121753
Kdelr3	469	3.60279e-09	1.65261e-08	-0.321378	-0.575135	0.188117	0.0169098
Csn2	469	9.87627e-05	0.000301294	0.206849	0.263354	-0.253891	0.239717
Gpc6	470	2.49991e-10	1.22358e-09	0.150667	0.203603	0.178538	-0.114862
Dpp9	470	4.53235e-06	1.60853e-05	0.0789693	0.0467305	0.10465	0.0952656
Kit	471	4.04702e-15	2.58986e-14	0.114133	0.14852	-0.243179	0.0749923
Capn6	471	4.22235e-09	1.92886e-08	-0.113927	0.0760481	0.119182	0.00766088
Tmtc4	472	1.97264e-05	6.49863e-05	0.0528251	0.0267503	0.0387828	0.0516251
Mad2l1bp	473	1.4811e-11	7.69759e-11	0.175466	0.157976	0.0737922	-0.0583691
Syngr1	474	3.90588e-17	2.81047e-16	0.07532	0.206678	-0.0338478	0.0928321
Itga3	476	4.23699e-17	3.0389e-16	0.0879165	0.165166	0.111568	-0.0886102
AW011738	476	0.00013003	0.000387652	0.0348185	0.0433859	-0.0250026	0.0493985
Spag7	477	1.61809e-11	8.38998e-11	0.314179	0.199593	0.11723	0.209979
Ankrd11	477	7.1485e-09	3.23571e-08	0.0134492	0.0996314	0.297952	0.0845847
Ctnnb1	478	0.000137555	0.000408991	0.00882435	0.0687319	-0.051946	0.247593
Nhsl1	479	4.72276e-17	3.37643e-16	0.143416	0.232245	0.144553	-0.0112878
Inhbb	479	7.87136e-10	3.76574e-09	0.130213	0.149246	-0.135306	0.10273
Egfl7	479	7.61292e-09	3.43546e-08	0.0311229	-0.0449267	0.109223	0.0552491
Serpinb6a	480	7.98656e-09	3.60042e-08	0.137434	-0.749822	0.31	0.060527
Phlda2	481	5.62136e-17	4.00601e-16	0.124955	0.2052	0.02343	0.0200827
Synj2bp	481	5.49151e-08	2.33389e-07	0.154817	0.160969	0.100529	0.122891
Ston2	482	6.11405e-17	4.34322e-16	0.108341	0.171793	0.117042	-0.0612311
Sod2	482	7.84161e-05	0.00024339	0.166359	0.106941	0.259383	0.250953
Tmsb10	483	9.8741e-09	4.42892e-08	-0.0960566	-0.677285	0.438787	0.164065
Osbpl3	484	7.13066e-17	5.04927e-16	0.00824526	0.186197	-0.302869	-0.0550986
Enpp3	484	3.69708e-11	1.88407e-10	0.137526	0.108243	-0.183806	0.0528346
Alpl	484	5.02611e-05	0.000159788	0.0779273	0.0908	-0.0353877	0.086598
Cadps2	485	2.28068e-10	1.11874e-09	0.0885026	0.106286	-0.0391536	0.0718927
Fbn1	486	1.34604e-08	5.99525e-08	-0.401678	-1.95313	0.11315	-0.029479
Plekhs1	487	5.31754e-11	2.69446e-10	0.090464	0.0932182	-0.0483731	0.00431049
Fkbp9	487	1.39845e-08	6.21627e-08	-0.436349	-0.919972	0.264418	0.0135375
Zfp598	487	2.67963e-06	9.71912e-06	0.11312	0.0923984	0.0669948	0.115627
Fam83h	488	9.57011e-17	6.74451e-16	0.0732527	0.123959	-0.0921524	0.0107543
4631405K08Rik	488	3.49503e-14	2.14124e-13	0.152033	0.180116	0.132241	-0.246657
Plod2	488	1.64959e-08	7.31071e-08	-0.0938568	-0.207484	0.11292	-0.0123656
Cdc25b	488	1.04964e-06	3.93526e-06	0.132248	0.101268	0.101182	0.100573
Stap2	489	1.04451e-16	7.33792e-16	0.0549699	0.179067	-0.29781	-0.0123518
Wdcp	489	1.66433e-08	7.36871e-08	0.0240315	0.106582	0.130468	0.105303
Fads3	489	0.000201142	0.000587853	-0.0441992	-0.161012	0.0310903	0.151775
Prlr	490	1.07518e-16	7.54149e-16	0.0845202	0.140111	-0.234855	0.0641669
Manf	490	1.82486e-08	8.03156e-08	-0.345259	-1.12417	0.373947	0.0674451
Gcc2	491	0.000103529	0.000314327	0.00728426	0.142934	-0.0181537	0.108209
Stbd1	494	1.34304e-16	9.31759e-16	0.108588	0.264093	0.0924538	0.0424811
Fam212a	495	2.45564e-08	1.0702e-07	-0.309232	0.0397059	0.138649	-0.151009
Igsf9b	496	4.23757e-15	2.70791e-14	0.00747661	0.131643	0.112226	0.0250107
Akr7a5	496	1.1581e-08	5.17891e-08	0.182869	0.292068	0.127162	0.183052
Tapbp	497	1.1098e-10	5.54156e-10	0.226117	-0.326763	-0.476867	-0.113393
Pvt1	497	0.000104342	0.00031658	-0.0193575	0.011248	0.084833	0.0779964
Tmem184a	499	1.93087e-16	1.32923e-15	0.108793	0.152115	-0.106936	-0.0132545
Lman1	499	5.75231e-06	2.01263e-05	0.144421	-0.286757	0.221467	0.19911
Nsa2	500	1.35613e-10	6.75639e-10	0.354467	0.16625	0.195737	0.0225273
Nudt4	500	2.91138e-08	1.26264e-07	-1.24717	-0.0800347	0.336503	0.0242029
Bbs7	500	0.000237713	0.000688409	0.0289859	0.0299204	0.0362859	0.0523902
Slc44a3	502	2.56044e-13	1.49858e-12	0.0947402	0.125302	-0.0898576	0.00906323
Dpysl3	502	3.00343e-08	1.30003e-07	-0.535696	-0.27694	0.131075	-0.00263138
Pdcd11	503	9.48671e-11	4.76368e-10	0.0442063	0.191341	0.12273	0.107743
Slc27a3	503	3.1177e-08	1.34818e-07	-0.0521827	0.06545	0.110263	-0.0542166
Tubgcp5	504	2.66649e-16	1.81599e-15	0.0834642	0.140381	0.0219631	0.0561721
Hebp2	504	5.06877e-13	2.86865e-12	0.227768	0.298794	0.0167364	0.138608
Reln	504	1.99057e-10	9.80754e-10	0.105428	-0.0397983	0.100235	-0.00447334
Adora2b	505	3.2779e-08	1.41608e-07	-0.0428078	-0.104422	0.0829978	-0.136435
Bex4	506	2.91021e-16	1.97895e-15	0.0298605	0.244946	0.160517	0.152518
S100a6	506	3.45602e-08	1.4887e-07	0.378634	-0.856948	0.360098	0.142213
Zc3h7b	506	0.000271753	0.000778886	0.00367243	-0.0149521	0.0758912	0.0869709
0610009B22Rik	507	1.24373e-09	5.83726e-09	0.1218	0.164188	0.0587146	0.116007
Foxa1	508	3.94343e-15	2.53084e-14	0.0953058	0.127496	-0.0298803	-0.0233314
Jam3	508	3.61513e-08	1.55273e-07	-1.59517	-0.36155	0.138637	-0.137327
Tm4sf1	508	0.000276342	0.000791529	-1.14749	0.196159	-0.596044	0.376854
Crip2	509	6.05424e-11	3.05732e-10	0.169426	0.591853	0.386203	0.0965781
Arpc1b	509	0.00028972	0.000827188	-0.393238	0.0237889	0.133184	0.285585
Cmtm8	510	3.38788e-16	2.28978e-15	0.151386	0.203839	-0.216632	0.0951236
Dnase2a	510	3.40014e-10	1.65692e-09	0.145405	0.141198	-0.0136559	0.0397015
Layn	510	3.81701e-08	1.63471e-07	-0.122635	-0.0854375	0.0854451	-0.0164048
Vkorc1	511	4.24917e-08	1.8163e-07	-0.203604	-1.11681	0.254164	-0.0177051
Apobec3	512	4.05076e-16	2.73365e-15	0.100062	0.207041	0.0506285	0.0630605
Nectin4	512	6.10942e-10	2.95134e-09	0.123758	0.111104	-0.377318	0.0554259
Mbnl2	513	4.34869e-08	1.85705e-07	-0.172735	-0.126665	0.298531	-0.057451
Zfp367	513	8.33838e-05	0.000257375	0.0688748	0.0476744	0.0586574	0.0529664
Eps8l2	514	4.3865e-16	2.95574e-15	0.0887464	0.166015	-0.149336	-0.0363833
Arhgef16	515	2.99316e-13	1.73362e-12	0.111995	0.148936	-0.0834801	0.0208691
Irx4	516	2.32198e-08	1.01692e-07	0.110362	0.114438	0.11728	0.00791193
Chd7	517	5.66633e-16	3.76684e-15	-0.123519	0.230829	-0.0153001	-0.134681
Pank1	517	1.79855e-06	6.61498e-06	0.0257236	0.0736609	0.0292962	0.0587632
Slc16a1	518	4.7878e-08	2.04261e-07	0.0161206	-0.0216203	0.159753	-0.179048
Ptgr1	519	8.93583e-10	4.26583e-09	0.19019	0.151472	0.151802	0.117889
Pde6d	519	2.52699e-05	8.24558e-05	0.131953	0.0481885	0.0877183	0.120363
Aunip	520	1.89683e-09	8.82807e-09	0.066923	0.0554281	0.0579289	0.0416426
Epha2	521	6.92086e-16	4.58713e-15	-0.0627073	0.216793	-0.187124	-0.239592
Rerg	521	5.40651e-12	2.87701e-11	0.099294	0.207594	0.150776	0.03521
Pop4	521	0.000300142	0.000854206	0.0503324	0.0827703	0.0482799	0.0783076
Casz1	522	1.32249e-12	7.26312e-12	0.113497	0.142276	-0.423536	-0.0519431
Lbhd2	522	5.52346e-08	2.34523e-07	-0.324154	0.144206	0.189943	0.134539
Ccnt2	523	7.50662e-16	4.96061e-15	0.252054	0.41459	-0.0189399	-0.0721252
Dhrs3	524	9.11794e-16	5.99871e-15	0.0339768	0.194388	-0.0640021	-0.0263462
Heatr1	524	6.49263e-08	2.74106e-07	0.0600568	0.107085	0.12196	0.0494721
Ocln	525	3.29216e-07	1.30109e-06	0.0597534	0.0704964	-0.23152	0.0538427
Traf4	526	1.18155e-15	7.73917e-15	0.15477	0.453648	0.198461	0.0803774
Tnf	526	6.39367e-10	3.08197e-09	0.163601	0.18969	-0.157586	0.0332791
Edil3	526	6.92464e-08	2.92067e-07	-0.124773	-0.255187	0.0998489	-0.0498662
Syce2	527	1.34571e-09	6.29601e-09	0.159572	-0.00760383	0.0910853	0.0944257
Tsc22d1	528	1.15376e-11	6.02444e-11	0.155486	0.655935	0.451033	-0.864097
Dusp14	529	2.14514e-15	1.39481e-14	0.137747	0.307562	-0.0193904	-0.101219
Rassf7	529	2.02526e-12	1.09872e-11	0.112689	0.139807	-0.0836379	0.00191148
Slc50a1	529	7.88211e-08	3.31823e-07	-0.507215	-0.681034	0.221894	0.0885847
Tmem123	530	2.26383e-15	1.46984e-14	-0.294036	0.520575	0.119002	0.051819
Sparc	530	8.47248e-08	3.55669e-07	-2.47796	-4.66674	0.486844	-1.08541
Tbc1d5	530	0.000516305	0.00141602	0.0107909	0.0225614	0.0212376	0.0489152
H19	531	2.54077e-15	1.64486e-14	0.164419	0.357837	0.224636	-0.342392
Pbx1	532	3.81288e-10	1.85399e-09	0.244139	0.319462	-0.145604	-0.0721823
Cep128	532	9.09021e-10	4.33263e-09	0.0550409	0.0729219	0.0601473	0.0457475
Tuft1	533	2.93717e-15	1.89872e-14	0.0574596	0.162173	-0.343303	0.0573104
Wbscr25	533	1.5221e-07	6.23108e-07	0.054528	0.0637385	-0.0776791	0.0459943
Fos	534	9.51536e-10	4.51827e-09	0.659597	0.910024	0.164637	-0.0218714
Socs2	534	1.02008e-07	4.25814e-07	-0.893793	-0.484113	0.220929	-0.122815
Ppl	535	3.11563e-15	2.01116e-14	0.102495	0.153834	-0.122104	-0.0569528
Grb7	535	7.01239e-13	3.93861e-12	0.107422	0.136123	-0.063601	0.0155734
Rps6ka4	535	1.18382e-07	4.90945e-07	0.0178151	0.0453798	0.110581	-0.0149872
Hist3h2a	535	1.13527e-05	3.83357e-05	0.127918	0.0736358	-0.00218741	0.0889675
Pxdc1	536	1.27906e-07	5.28962e-07	-0.481136	-0.823177	0.268672	-0.591573
Tnip3	537	1.12265e-12	6.2038e-12	0.136606	0.178829	-0.151549	0.0501791
Lix1l	537	1.36426e-07	5.61593e-07	-0.620198	-0.309398	0.12831	-0.05704
Gdpd1	538	2.66846e-13	1.55771e-12	0.14013	0.19793	-0.369019	0.0691465
Cdv3	538	1.38531e-07	5.69203e-07	0.0387928	-0.304664	0.338859	0.0932819
Ccdc122	538	0.000102184	0.000310666	0.0815983	0.0672236	0.0687974	0.079734
Vtcn1	539	2.28051e-09	1.05916e-08	0.0663771	0.0753187	-0.243702	-0.0120133
Lhfpl2	539	1.43387e-07	5.88613e-07	-0.101523	-0.240019	0.142693	0.0218101
Sptbn1	540	1.44145e-07	5.91181e-07	-0.198627	-0.637112	0.263417	0.0466604
Tnfaip2	540	0.000742842	0.00199796	-0.160933	-0.587445	-0.135248	0.112479
2310033P09Rik	541	4.96285e-15	3.16684e-14	0.14955	0.278221	0.102342	0.0731388
Plk2	542	5.1329e-15	3.27066e-14	0.267881	0.452324	0.157599	-0.00871676
Trip12	542	3.7957e-09	1.73752e-08	0.228784	0.0331705	-0.0814894	-0.199375
Ctps	542	1.55917e-07	6.36737e-07	0.0936504	0.132971	0.21043	0.116741
Hist1h4i	542	5.29994e-07	2.05091e-06	0.137589	0.130925	0.122891	0.114557
Fkbp7	543	1.58841e-07	6.47875e-07	-0.507913	-1.21992	0.116035	-0.0517793
Acly	543	0.000782007	0.00209318	0.0845054	-0.14109	0.0152307	0.142727
Pdha1	544	4.11659e-07	1.61402e-06	0.248813	0.315177	0.226917	0.199851
Ly6a	545	4.74352e-09	2.1625e-08	0.3118	-0.21462	-0.886025	-0.363496
Npw	545	1.74571e-07	7.09435e-07	-0.38079	-0.213103	0.168329	0.109572
1810009A15Rik	545	4.94271e-05	0.000157361	0.0237883	0.0366066	0.0189962	0.0314366
Ovol1	546	6.19297e-15	3.93488e-14	0.0955193	0.147605	-0.152161	-0.0695523
Ralb	546	4.99785e-09	2.27379e-08	0.24093	0.276007	-0.0831947	-0.0292085
Cnih2	546	1.11428e-06	4.16708e-06	-0.0851893	0.0354594	0.0712177	0.0622249
Pdlim4	547	6.89892e-15	4.37718e-14	-0.148512	0.52982	0.267383	-0.065007
Isca2	548	0.000209826	0.000610427	0.0904618	0.083198	0.055745	0.101081
Sox11	549	8.11352e-15	5.13319e-14	-0.639277	0.307472	0.191304	-0.041211
Cxcr4	549	9.60173e-15	6.05752e-14	0.134478	0.16603	-0.0132123	0.0775488
Itm2a	549	2.18148e-07	8.78508e-07	-0.742455	-0.578309	0.148359	-0.0105772
Ccdc167	549	2.61331e-07	1.04579e-06	0.102775	0.0295614	0.0840488	0.0886611
Tfap2a	550	9.35864e-15	5.91254e-14	-0.00361118	0.171859	0.0606286	0.00801411
Ror2	550	2.24748e-07	9.03453e-07	0.0304566	0.0180262	0.0814847	0.00495538
Gm29666	550	1.32283e-07	5.45543e-07	0.146629	0.134339	0.137775	0.111733
Trib3	551	5.19135e-10	2.51603e-09	0.109468	0.122118	0.0564878	0.0393215
Las1l	551	2.26309e-09	1.05217e-08	0.119867	0.275012	0.00577834	0.124459
Ing2	551	1.14767e-07	4.7773e-07	0.170803	0.312778	0.259179	-0.06837
Qpct	552	2.50432e-07	1.00398e-06	0.125827	-0.062327	0.158585	0.0500003
Mapk12	552	0.00094826	0.00250805	0.0127425	-0.0526858	-0.00342702	0.0222624
Limch1	553	1.03042e-14	6.48235e-14	-0.303327	0.159279	0.108837	0.00340578
Gtf2i	553	1.50616e-11	7.81869e-11	0.117554	0.332485	0.0600097	0.148741
B930036N10Rik	553	5.18817e-11	2.6319e-10	0.170895	0.215264	0.145402	0.0951537
Selenom	553	2.58367e-07	1.03486e-06	-1.23288	-1.75876	0.298296	-0.328122
F2rl1	554	6.50913e-09	2.95532e-08	0.0817399	0.0899844	-0.135051	0.0391657
Gsto1	555	1.09393e-14	6.87215e-14	0.0983025	0.596714	0.396901	-0.0236611
Piwil2	555	8.94266e-14	5.37525e-13	0.054417	0.127618	0.0571492	0.075706
Htra1	555	2.71209e-07	1.08241e-06	-0.126043	-1.50191	0.129056	-0.125807
Zfp865	556	0.0010887	0.0028608	-0.0239665	0.0279617	0.0326895	0.0508019
Rell1	557	2.85248e-07	1.13538e-06	0.00628777	0.142177	0.187772	0.00908359
Rtel1	557	0.000500286	0.00137378	0.0540598	0.0233759	0.0487373	0.0454193
Flywch2	558	1.28055e-14	7.99941e-14	0.121773	0.235544	0.13697	0.0436241
Dync2h1	559	1.2887e-14	8.03903e-14	-0.446833	0.209175	0.015167	-0.0364775
Nde1	559	0.000157035	0.000462894	0.0715752	0.0710144	0.0804652	0.0793915
Serpina3n	560	3.2289e-07	1.27949e-06	-0.130617	-0.231479	0.185332	-0.630401
Aldh2	561	1.53756e-14	9.57802e-14	-0.361538	0.546401	0.115362	-0.257939
Kitl	561	3.25724e-07	1.28958e-06	-0.0355059	0.126481	0.225213	-0.157476
Sorbs1	562	1.77944e-08	7.85492e-08	0.0415671	0.172301	0.13769	-0.00886008
2900060B14Rik	563	1.88225e-14	1.16438e-13	0.138313	0.253903	0.029928	-0.0767999
Dmkn	564	2.67517e-14	1.64802e-13	0.175078	0.284131	-0.457256	-0.0901767
Angptl6	564	9.69654e-10	4.58476e-09	-0.00511558	0.097903	0.0257232	0.0548054
Ppp3ca	564	4.08618e-07	1.60351e-06	-0.0393128	0.220242	0.226037	-0.147366
Stc2	565	0.00130693	0.00340215	0.0340826	-0.0474615	-0.109887	0.0506419
H2-T23	566	1.69527e-08	7.49826e-08	0.200815	0.048767	-0.264909	-0.223793
Folr1	566	0.000710955	0.00191682	0.0823216	0.0132705	-0.300578	0.0801758
Rnf121	567	4.27254e-07	1.67222e-06	0.0556637	0.101489	0.142084	-0.0287663
Mansc1	568	3.44022e-14	2.11348e-13	0.10899	0.173534	-0.137683	0.0306438
Tmem158	568	4.28291e-07	1.67481e-06	0.0254221	-0.0217216	0.167493	-0.111113
Calu	569	4.31195e-07	1.68469e-06	-0.402312	-1.04689	0.268725	-0.0278975
Cmtm4	569	2.31752e-05	7.57317e-05	0.0479286	0.0495489	0.0816489	0.070516
Trf	570	1.80372e-08	7.94635e-08	0.354426	0.518689	-1.17912	-0.157535
Csn1s1	570	2.0807e-08	9.12149e-08	0.168867	0.376313	-0.126978	0.200566
Gpm6b	570	4.32196e-07	1.68705e-06	-0.221778	0.11839	0.286358	0.147282
Foxq1	571	3.91635e-14	2.38951e-13	0.0918585	0.142337	-0.124058	0.0469121
Apoc1	572	2.92938e-13	1.70332e-12	0.195584	0.300982	-0.271028	-0.150654
Stx17	572	0.00172867	0.00441485	0.0369653	0.0103211	0.0384936	0.0667104
Il33	573	2.05695e-08	9.02625e-08	0.117864	-0.238236	-0.0458661	0.0112218
Jag1	573	4.54472e-07	1.76942e-06	-0.0656977	-0.184554	0.121706	-0.108808
Mgst1	573	2.66695e-06	9.68101e-06	0.0394399	0.507026	-0.616557	0.26201
Ptprf	574	4.10393e-14	2.49712e-13	0.186772	0.297001	-0.214683	-0.0665096
Net1	574	2.42368e-08	1.05834e-07	0.146303	0.0713748	0.0714037	0.0721798
Pbld1	574	4.61539e-07	1.7938e-06	0.0952199	0.0704524	0.118786	0.0779766
Pbxip1	574	0.00176494	0.00450489	0.0460901	-0.211764	0.0811539	0.128955
Lama5	575	4.36151e-14	2.65023e-13	0.0783111	0.192695	-0.039347	-0.036901
Cep192	575	2.4314e-08	1.06067e-07	0.140303	0.127662	0.114304	0.0621327
Acta2	575	5.09118e-07	1.97184e-06	-0.0279593	-2.1313	0.279566	-0.56663
Smyd4	575	0.000603254	0.00163735	0.0491011	0.0572568	0.0233729	0.0553546
Peg3	576	4.76381e-14	2.8868e-13	-0.237502	0.327707	0.187828	-0.00869161
Zfp24	576	7.17745e-10	3.45231e-09	0.172541	0.267869	0.195129	0.108676
Sirt7	578	2.84362e-08	1.23565e-07	0.130581	0.142219	0.0162652	0.0429961
Ccdc88c	579	3.57568e-13	2.05374e-12	0.0764869	0.100743	-0.0188885	-0.034142
Smagp	579	0.000175529	0.000515364	0.0989239	0.190301	-0.249757	0.11774
Kctd14	580	8.46065e-05	0.000260607	0.038209	0.0602394	-0.0678657	0.0504097
Ttc37	581	1.13184e-05	3.8249e-05	0.0594849	0.0451604	0.0816606	0.0616413
Bcl2l14	582	6.82638e-14	4.1143e-13	0.0854445	0.14418	-0.187473	0.0394264
Gm47283	582	3.59912e-08	1.54734e-07	0.289638	-0.216201	0.146687	0.110004
Tgif2	582	5.79064e-07	2.23303e-06	0.00459995	0.064979	0.124176	-0.0759476
Pck2	582	0.00225837	0.00567652	0.0609972	0.0365225	-0.0226508	0.111455
Zfp750	583	0.00119905	0.00313415	0.0237279	0.0290838	-0.0154637	0.0275564
Fhl2	584	4.11345e-08	1.75997e-07	0.23289	0.225001	-0.0785135	-0.0468185
Rnase4	584	6.14954e-07	2.36733e-06	-0.0947393	-1.33555	0.261176	-0.57171
Gm13075	584	1.81641e-06	6.67516e-06	0.138414	0.107822	0.0569662	0.0914766
Map4k4	585	6.79974e-07	2.60189e-06	-0.444552	-0.321396	0.204023	-0.00645305
Fbxw5	585	0.00241138	0.0060271	0.0218567	0.00233099	0.0105384	0.0627357
Ralgps2	586	9.43547e-14	5.66383e-13	0.0924414	0.161129	0.0488566	-0.0425996
Pdxp	586	7.0858e-07	2.70902e-06	0.0556913	0.100783	0.120847	-0.00866106
Gga2	587	7.12373e-07	2.71886e-06	0.0320509	-0.00407547	0.115595	0.054866
Haus6	587	9.91432e-05	0.000302041	0.0525829	0.0387294	0.0531327	0.0514759
Cwf19l2	588	1.02093e-13	6.1201e-13	-0.139417	0.291734	-0.0983937	-0.0584352
Ckap4	588	7.18597e-07	2.73533e-06	-0.364105	-0.778716	0.215617	-0.0319413
Mgme1	588	8.37928e-06	2.88195e-05	0.0284332	0.0810139	0.0639648	0.0620874
Fam83f	589	1.47066e-10	7.31063e-10	0.0647903	0.0861049	0.0389792	0.0107468
Anxa6	589	8.03167e-07	3.04451e-06	0.212761	0.00528797	0.254305	0.170919
Fnbp1l	590	1.25331e-13	7.48289e-13	0.205819	0.328439	0.0733784	0.0367367
Dact2	590	1.06741e-11	5.59325e-11	0.106721	0.155617	-0.033455	0.0162284
Tspan4	590	7.78385e-07	2.95309e-06	-0.366021	-0.671862	0.190675	0.0283316
Apol7a	590	0.000163605	0.000481624	0.0252542	0.0363598	-0.145579	0.0288413
Nipal2	591	1.37076e-13	8.16228e-13	0.125391	0.220627	-0.264277	-0.0201477
Nars2	591	0.00152193	0.00392475	0.00696777	0.0347576	-0.0120276	0.0388086
Nat10	592	0.0027412	0.00677919	0.0257716	0.0567417	0.0465502	0.0605072
Apobec1	593	8.05614e-07	3.05119e-06	-0.0470047	0.123878	0.130617	0.0551213
Fam3c	593	0.0028972	0.00713328	-0.284671	0.0754461	-0.0915429	0.141803
Ptcra	595	4.46658e-07	1.74052e-06	0.0717009	0.150254	0.144603	0.0668268
Arc	596	2.24e-13	1.31622e-12	-0.239815	0.288747	0.0603856	-0.55947
Arrdc4	596	1.2907e-12	7.09726e-12	0.168821	0.275457	-0.180491	-0.108083
Brd8	599	2.57268e-13	1.50377e-12	0.00656485	0.384655	0.107109	0.0284252
Fkbp11	599	1.04073e-06	3.90844e-06	-0.210908	-0.197379	0.301218	0.179652
E2f2	599	0.00172021	0.00439577	0.0269674	0.0304962	0.0250841	0.028933
Lars2	600	7.96286e-08	3.34591e-07	0.154672	0.133286	-0.168989	0.0926648
Pdlim1	600	1.59686e-07	6.50723e-07	0.294768	-1.53039	0.00945846	0.182476
P4ha1	600	1.04298e-06	3.91359e-06	-0.648719	-0.664535	0.145846	-0.301072
Rorc	601	2.70895e-13	1.57928e-12	0.0521389	0.108626	-0.182415	-0.0813584
Atp6v1b1	601	1.00691e-12	5.57809e-12	0.149492	0.211775	-0.336448	0.0500506
Ylpm1	601	9.3679e-05	0.000286767	0.114003	0.132653	0.107356	0.103041
Krt7	602	6.81167e-09	3.08953e-08	0.114482	0.202232	-0.829267	0.108387
S100a10	602	1.11984e-06	4.18436e-06	-0.252161	-0.256823	0.378809	-0.605023
Spint1	603	5.89236e-09	2.67802e-08	0.0750933	0.0932067	-0.180306	0.000334067
Hhipl2	603	2.64819e-08	1.15298e-07	0.0038889	0.0857295	-0.145425	0.0510042
Igsf9	604	2.93407e-13	1.70382e-12	0.07452	0.114165	-0.0258361	0.0146333
Cntfr	604	1.34987e-08	6.0063e-08	0.0719866	0.141778	0.105625	-0.32012
Pacsin3	604	9.55936e-08	3.99788e-07	0.143162	0.162057	-0.0897245	-0.0535531
Gm4117	604	0.00362554	0.00880488	-0.0628649	0.00303443	0.00792595	0.0227066
Syne2	605	1.16649e-07	4.84555e-07	0.118503	-0.0708187	-0.0453391	-0.0468208
Impact	605	1.23988e-06	4.62903e-06	-0.0476797	-0.205656	0.110649	0.0432645
Hist1h4d	605	0.000539774	0.00147313	0.0706934	0.0525119	0.0354274	0.0564816
Gjc3	606	1.47081e-09	6.87407e-09	-0.159026	0.148817	0.115021	-0.00751376
Nt5c2	606	9.91476e-06	3.37876e-05	0.0222332	0.115243	-0.0421646	0.0692943
Phldb3	607	3.22319e-13	1.8596e-12	0.0334698	0.0972997	-0.0705984	-0.0195374
Tap2	607	1.30323e-07	5.37958e-07	0.123599	0.147341	-0.210324	0.00946423
Dtx4	607	0.00376995	0.00912077	0.0173219	-0.00417284	-0.0157627	0.0335237
C2cd4b	608	2.15108e-11	1.1089e-10	0.105608	0.147323	0.0243617	-0.0402558
Arfrp1	609	1.34986e-07	5.56176e-07	0.188547	0.032748	0.100299	0.104025
BC016548	609	0.00063407	0.00171681	0.0205435	0.0433612	-0.0436668	0.0360271
Rhoj	610	1.32334e-06	4.9241e-06	-0.239771	-1.05783	0.177395	0.0593155
Cavin1	611	1.48083e-06	5.48266e-06	-0.210242	-0.675461	0.129649	-0.0732399
Rarg	613	4.83734e-13	2.74116e-12	-0.225362	0.243806	0.0775714	0.0073048
Sh2d4a	613	1.55968e-07	6.36737e-07	0.0840491	0.0805233	-0.0721392	0.0516382
Loxl3	613	1.51515e-06	5.60505e-06	-0.292303	-0.484612	0.107681	-0.0255104
Flnb	613	0.00442862	0.0106564	0.0884129	0.0317106	0.0521835	0.123066
Ivd	614	0.00445168	0.0107061	0.0350592	0.0260938	0.00393275	0.0518225
Cenpt	615	1.61382e-07	6.57036e-07	0.112595	0.0901775	0.0942931	0.0495796
Igfbp7	615	1.65426e-06	6.10446e-06	-1.58291	-5.17814	0.309683	-0.540739
Lrrc1	615	0.00227553	0.00570997	0.0272058	0.0531913	0.0198283	0.0438465
Mfap2	616	1.71267e-06	6.31476e-06	-1.47937	-2.047	0.14013	-0.0989396
Orc3	616	0.00251179	0.00626753	-0.021029	0.048944	0.0416878	0.04649
Cars2	617	4.62536e-09	2.1108e-08	0.059593	0.167038	0.0614441	0.0863525
C3	617	1.77793e-07	7.21211e-07	0.149576	0.186065	-0.373817	-0.150785
P3h3	617	1.75841e-06	6.47805e-06	-0.673168	-1.32972	0.1192	-0.0869412
Foxc1	618	6.27869e-13	3.53544e-12	-0.11156	0.240379	-0.00454667	-0.0565844
Iqgap1	618	1.80689e-07	7.32292e-07	0.269418	-0.154288	0.0469503	0.0573967
Gpx8	618	1.82967e-06	6.71836e-06	-0.176969	-1.4129	0.210184	-0.101103
Pcbd1	618	0.0022663	0.00569323	-0.0655209	0.0640421	0.117475	0.0669366
Pfas	619	0.00509166	0.0120693	0.0356088	0.0297914	0.0283264	0.0509696
Spp1	620	2.02967e-07	8.20342e-07	0.573829	-0.264547	0.344502	0.0166024
Tns3	620	2.50483e-06	9.1297e-06	-0.0489548	-0.00568446	0.154439	-0.135803
Numa1	620	0.000260724	0.000750171	0.111277	0.0703415	0.0238571	0.0951169
Ctsc	621	2.71929e-06	9.85493e-06	-0.232078	0.110728	0.187759	-0.148497
C1qtnf1	621	0.00524841	0.0124013	-0.0122089	-0.142695	-0.0174334	0.0270473
Bricd5	622	8.22324e-13	4.59552e-12	0.0140373	0.134423	0.0521297	0.0119842
Itgb8	623	9.44061e-13	5.24295e-12	0.0569978	0.179361	-0.0485309	0.0142222
Adamts9	623	3.05324e-06	1.10204e-05	-0.145888	-0.18629	0.0850368	-0.137663
AC127341.3	624	9.83282e-13	5.45397e-12	0.0807826	0.158845	0.00401528	0.0195695
Klhdc3	624	1.02206e-09	4.82742e-09	0.15398	0.210484	0.142418	0.0777632
Ptpn21	624	0.000265378	0.000762736	0.0557351	0.0461705	-0.0575588	0.0433748
Enc1	625	2.38213e-07	9.56718e-07	0.0663324	-0.0545715	0.0580766	0.00268313
Rtn1	625	3.41765e-06	1.22859e-05	-0.181281	0.0555825	0.0847166	0.0425682
Fance	625	0.000290102	0.000827747	-0.0285608	0.0487171	0.0962119	0.0786054
Etv5	626	3.78376e-06	1.35582e-05	-0.0225127	-0.0100787	0.117291	0.0515433
Prune2	627	2.63496e-07	1.05351e-06	0.0632122	0.0547269	0.0341012	-0.0181997
Tns4	628	3.68991e-08	1.58332e-07	0.0949389	0.116795	0.0136487	-0.205692
Sdhaf2	628	3.97994e-06	1.42268e-05	0.0363936	0.0792915	0.124455	0.0553269
Hebp1	628	0.00601027	0.0140376	-0.437049	-0.103617	-0.167954	0.127911
Lmo1	629	4.0233e-06	1.43588e-05	-0.0885517	0.111117	0.128927	-0.167083
Ammecr1	629	0.00103134	0.00271649	0.0425667	-0.121665	0.0632311	0.0645154
Tmsb15b1	630	1.24943e-12	6.89587e-12	0.0153358	0.109178	0.0485826	0.01846
Coro1b	630	1.25415e-05	4.22542e-05	-0.0206205	0.20982	-0.0298459	0.130583
Zfp326	631	1.2719e-12	7.00253e-12	-0.0914528	0.382457	0.0571251	-0.167845
Actg2	632	2.84659e-07	1.13405e-06	0.12716	-0.444994	0.128844	0.031057
Wdr11	632	0.00116094	0.00303987	0.0414255	0.00262474	0.0112548	0.0306239
Hist1h2bc	633	2.88595e-07	1.14666e-06	0.334567	-0.206635	-0.153035	-0.04767
Mthfs	633	0.00629984	0.0146525	0.0266287	0.0313412	0.000646116	0.0469415
Cobl	634	1.54879e-08	6.87084e-08	0.0769794	0.0971369	-0.123847	0.0450962
Cxcl14	634	4.61313e-06	1.6333e-05	-0.6796	-2.35944	0.221889	-0.779415
Pigw	634	0.00632823	0.0146955	-0.0025585	0.0179318	0.0212122	0.0287547
Rab11fip1	635	1.50325e-12	8.22542e-12	0.0782529	0.134943	-0.316277	0.00734976
Nt5e	635	3.21049e-07	1.27333e-06	0.0649023	-0.0060601	-0.00632352	-0.0210529
Ndrg1	636	1.64267e-12	8.96625e-12	0.252122	0.542913	-0.219715	-0.447807
Zfp825	636	1.24807e-07	5.17106e-07	0.0410222	0.0644211	0.0428321	0.0432174
Zbtb18	636	3.37068e-07	1.32976e-06	0.0448657	0.0346474	0.00161944	0.0103306
Dag1	636	4.79402e-06	1.69062e-05	-0.392455	-0.0631512	0.210909	0.00890813
Tjp2	637	1.76873e-12	9.61896e-12	0.125358	0.23498	-0.199373	0.0596617
Zc3hav1	637	3.95958e-07	1.55657e-06	0.127469	-0.0353929	-0.121202	-0.0735023
Gnb4	637	4.89021e-06	1.72318e-05	-0.112149	-0.82279	0.117425	0.0649939
Mmp15	637	0.00674641	0.015537	0.0311589	0.000255822	-0.0998285	0.0340193
Rgs20	638	3.20222e-12	1.71426e-11	0.0652086	0.101055	-0.0536094	-0.0424307
Zfp395	638	6.74008e-07	2.58128e-06	0.0806688	0.0905959	0.0479784	0.0556174
Insig2	639	4.59498e-07	1.78743e-06	0.18401	0.193188	-0.106866	0.0554106
H2afy2	639	4.94929e-06	1.74262e-05	-0.214621	-0.104859	0.0799903	0.0137226
Edc4	639	0.00531295	0.0125338	0.0361663	0.0220755	0.0484161	0.0364375
Epb41l4a	640	1.17832e-09	5.54781e-09	0.0948338	0.131751	-0.102477	0.0319195
Timp1	640	5.27851e-06	1.8556e-05	-0.774277	-3.49907	0.276969	-0.253037
Ascc2	641	0.0070802	0.0162469	0.0208513	0.00979247	0.0265191	0.0599486
Col9a2	642	2.16025e-12	1.16911e-11	-0.0982523	0.189548	-0.00869529	-0.25838
Ccdc120	642	5.04822e-07	1.9586e-06	0.0523669	0.0580614	-0.0291046	0.0286782
Tgfb1	642	5.71648e-06	2.00324e-05	-0.83199	-0.73605	0.153925	-0.210302
Got1	642	5.89509e-05	0.000185823	0.098846	-0.00540092	0.0181129	0.0695383
Use1	643	2.25066e-12	1.21656e-11	0.102839	0.541202	-0.0783493	-0.487376
Tnfsf10	643	3.23027e-11	1.65375e-10	0.106108	0.15011	0.0490118	-0.0925154
Btc	643	0.00718878	0.0164537	0.010296	0.00406619	-0.0535066	0.017776
Serpinb8	644	2.43634e-12	1.31533e-11	-0.0262314	0.158173	-0.0278438	-0.0054536
Snapc5	644	0.000136198	0.000405228	0.109265	-0.109642	-0.0860592	0.0824497
Myh14	645	2.90277e-12	1.5577e-11	0.0299568	0.1	-0.255648	0.00910436
Cdkn1b	645	1.31136e-06	4.8836e-06	-0.242283	0.201322	0.176278	0.0151546
Prelp	646	2.38794e-09	1.1079e-08	0.0211496	0.33651	0.21124	0.0150686
Chit1	646	0.000632495	0.00171463	0.0324314	0.0325369	-0.0401937	0.0305464
Col7a1	647	6.9873e-06	2.42757e-05	-0.0581668	-0.00726708	0.0819478	-0.081975
Atat1	648	6.64596e-07	2.54962e-06	0.113498	0.109533	-0.0301832	0.0769303
Pcsk6	649	5.22077e-12	2.7815e-11	0.0384825	0.1286	0.0489284	0.0320644
Tssc4	649	9.11209e-05	0.000279513	0.11732	0.0776356	0.117416	0.0957199
Gca	650	0.00376515	0.00911411	-0.0238386	0.0289656	-0.0182796	0.0137038
Gm13205	651	3.96523e-07	1.55742e-06	0.0651475	0.0700566	0.0520965	-0.00176852
Tcf4	651	9.23814e-06	3.15784e-05	-0.631447	-0.60931	0.183256	0.0358856
Zcchc10	651	0.000117842	0.000354161	0.11293	0.154022	0.129966	0.11373
Msi2	652	6.35942e-12	3.37201e-11	0.0673126	0.211003	0.082465	0.018415
Gchfr	652	0.00767935	0.017442	-0.0495887	-0.204496	0.0182707	0.0232194
Pcolce	653	1.01442e-05	3.45166e-05	-2.48506	-3.07427	0.208381	-0.248713
Ap1b1	654	0.00308824	0.00757436	0.0477484	0.0598357	-0.0127198	0.0560967
Epop	655	8.56857e-07	3.23976e-06	0.113467	0.141317	0.107427	0.0127069
Gas2l3	655	0.00802132	0.0181817	-0.0217309	-0.0413345	0.0204878	0.0297017
Rexo5	656	8.64673e-07	3.26654e-06	0.0450744	0.0366674	0.0242119	0.0225742
Pdia4	656	1.06454e-05	3.61118e-05	0.0984587	0.0380061	0.223034	0.0171764
Igsf5	656	0.00818815	0.0185409	0.0108905	0.0109824	-0.0106976	0.0172719
Chst10	657	0.00830477	0.0187859	0.00153499	0.000922214	-0.000859509	0.0142452
Tead1	658	1.12963e-05	3.82032e-05	-0.220194	-0.185792	0.130611	0.0245693
Ap3s1	658	0.00834201	0.0188606	-0.284702	-0.42533	0.0331058	0.127932
Zfp930	659	2.66416e-07	1.06423e-06	0.0605395	0.0826959	0.0589184	0.0506424
1500015O10Rik	659	1.19638e-05	4.03686e-05	-1.40059	-0.00520045	0.272197	0.00772763
Eps15l1	660	9.45613e-07	3.56626e-06	0.101752	0.0629871	0.0898688	-0.00562997
Utp15	660	0.000353661	0.00099382	0.070015	0.0173399	0.0696322	0.0587481
Etv6	661	1.00469e-11	5.27699e-11	-0.11171	0.245035	0.0594638	-0.0178368
Rgs12	661	1.32994e-05	4.46722e-05	-0.00225227	-0.0992356	0.0664895	-0.0303837
Anxa8	662	9.97463e-07	3.75545e-06	0.121079	0.123551	-0.0877599	-0.389593
Ramp2	663	1.47966e-05	4.9552e-05	-0.274253	-0.0974619	0.0932216	0.0595992
Pxylp1	663	0.000249598	0.000720952	0.0529925	0.036806	0.0185333	0.0437651
Mfsd6	664	1.14233e-11	5.9788e-11	0.123085	0.200969	-0.295874	-0.0566859
Kazald1	664	1.52469e-05	5.09834e-05	-0.374447	-0.0812739	0.111361	-0.0584922
Cd47	664	0.0088386	0.0198829	0.0910641	-0.341441	-0.056737	0.1404
Ttc39a	665	3.55721e-11	1.81695e-10	0.074919	0.0923077	0.00971006	0.0142738
Ywhah	665	1.54665e-05	5.16787e-05	-0.238552	-0.154891	0.25754	-0.0556582
Slc28a3	665	0.00447517	0.0107452	0.0134024	0.040592	-0.118544	0.0366422
Sun2	666	0.00899441	0.0201819	0.0181349	0.0859266	-0.0573228	0.0809987
Def8	667	1.3045e-06	4.86213e-06	0.0575474	0.0268694	0.00506682	0.0354754
Gm6710	667	0.00465688	0.0111515	0.0110677	0.0125867	0.0330661	0.0332321
Lama3	668	1.29501e-06	4.83081e-06	0.0826047	0.0995613	0.0657883	-0.145627
Itgb1	668	1.69199e-05	5.62818e-05	-0.595602	-1.12651	0.23792	-0.160768
Myo1b	669	1.43223e-06	5.31154e-06	0.227161	-0.0344335	0.166544	0.0412861
Trim7	669	0.000267095	0.000767017	0.0214174	0.0560709	-0.00471441	0.0300463
Zfp296	670	1.7884e-11	9.26224e-11	0.0700288	0.122336	0.0151939	-0.0367626
Sh2d5	670	1.76088e-05	5.8486e-05	0.0189883	0.0681355	0.0682466	-0.0405718
Gjb2	670	0.00943008	0.0211169	0.0292084	0.0137037	-0.147716	0.0345597
Senp1	671	0.00270029	0.00668544	0.0325611	0.0733664	0.0139086	0.0513892
Rab17	672	4.27843e-06	1.52449e-05	0.0339367	0.0539353	-0.053099	0.0377665
Prrx1	672	1.79305e-05	5.94658e-05	-1.05849	-1.20946	0.0904375	-0.0643699
Ugdh	673	1.8496e-05	6.12043e-05	-0.96798	-1.47066	0.229545	-0.544983
Pik3r4	673	0.00970005	0.0216561	0.0281163	0.00957043	0.0114742	0.0361977
Clec11a	674	1.89526e-05	6.26688e-05	-0.0195624	-0.994607	0.0815835	-0.181209
Tspan18	675	1.89896e-05	6.27445e-05	-0.127472	-0.0403989	0.0779531	-0.0766063
Pnp	676	1.93066e-05	6.37446e-05	-0.00934303	-0.399679	0.175728	0.036114
Tspan12	676	0.0105535	0.0234089	0.0472494	0.0363099	-0.0685328	0.0662309
Cyp51	677	1.95969e-05	6.46073e-05	-0.0891606	-0.2683	0.153013	0.0641237
Ccdc28a	678	0.00530088	0.012512	0.0142047	0.0499783	0.00158224	0.0482779
Ereg	679	1.99272e-05	6.55991e-05	-0.117253	-0.113488	0.0677402	-0.0348992
Orai1	680	3.43501e-11	1.75655e-10	-0.146108	0.322838	0.0504299	0.00472537
Cxcl10	680	1.78403e-06	6.56698e-06	0.250776	-0.138661	0.229153	0.134495
Cxcl12	681	2.12495e-05	6.9746e-05	-0.870777	-0.250062	0.138014	-0.044389
Srrd	682	0.000336288	0.000950397	0.0379147	0.100035	0.0991506	0.0693052
Cbr2	683	4.90107e-11	2.4891e-10	0.0321084	0.157987	-0.132698	-0.252874
Neil3	683	1.83497e-06	6.73224e-06	0.0594013	0.0278222	0.0316762	0.0394542
Lama4	683	0.00135652	0.00351685	-0.488799	-0.747745	0.0932128	0.0825581
Ankrd37	684	3.3006e-06	1.18843e-05	0.117705	0.0872751	0.119207	0.0492132
Stra6	684	0.00591785	0.0138435	0.0406133	0.0202365	-0.00184425	0.0429464
Tnfrsf19	685	2.54333e-10	1.24347e-09	0.0618165	0.104923	0.133506	0.0988356
Hist1h1c	685	1.96053e-06	7.18699e-06	0.189901	0.0130968	-0.0200171	0.00405862
B3galt6	685	0.00149968	0.00386997	-0.00261879	0.0796206	0.0816527	0.0716588
Ahr	686	6.00906e-11	3.03795e-10	-0.04567	0.202937	-0.158631	-0.0485212
Rsad2	686	0.011768	0.0259093	0.0215296	-0.0305297	-0.0905653	0.04007
Fam221a	687	9.5741e-11	4.80214e-10	0.0860737	0.118958	-0.0829341	0.00844707
Tlnrd1	687	2.61495e-05	8.52635e-05	0.0418467	-0.141729	0.148186	0.0863277
Frmd4b	688	6.54618e-10	3.15207e-09	0.13947	0.18497	-0.00473402	-0.0446648
Lalba	688	3.68173e-07	1.44929e-06	0.168918	0.263463	-0.326157	0.118363
Sprr1a	689	2.38736e-06	8.73014e-06	0.155933	0.158434	-0.102037	-0.0561535
Enpp1	689	2.87917e-05	9.35363e-05	-0.29184	0.0137882	0.169223	0.0876825
Ajuba	689	0.000472998	0.00130448	0.0683532	0.0676603	0.0472624	0.0578181
Apol9a	690	3.58257e-08	1.54172e-07	0.128683	0.165023	-0.476991	0.0751992
Itpk1	690	2.98325e-05	9.66356e-05	0.0792683	0.0318554	0.083328	0.0096123
Ccne2	691	1.81124e-05	6.00241e-05	0.0710718	0.0532532	0.0564334	0.0236358
Gstt2	691	0.000347111	0.000977884	0.0684364	0.0694877	-0.0966724	0.0530446
Epn2	692	0.0128685	0.0281237	-0.0572666	0.0220332	-0.0132238	0.0827697
Cldn1	694	1.02537e-10	5.13146e-10	0.103457	0.157906	-0.212839	0.0451206
Atp6v1b2	694	3.10862e-06	1.12112e-05	0.180363	0.206135	-0.280587	-0.0997398
Etfbkmt	694	2.22279e-05	7.27427e-05	0.0334696	0.0658934	-0.0192427	0.0370654
Pak6	695	1.10046e-10	5.50106e-10	0.0513336	0.0990848	0.0377265	-0.0328076
Lnx1	695	3.14671e-06	1.13393e-05	0.0537894	0.0592614	-0.0192503	-0.00634869
Aen	695	3.78105e-05	0.000121506	-0.00924897	-0.17672	0.129514	0.0330702
Fam120b	698	4.20099e-06	1.49809e-05	0.0732702	0.0694019	-0.00451919	0.0182291
Lbp	699	1.57015e-10	7.7878e-10	-0.0211027	0.342554	-0.361732	-0.598226
Hspb8	699	4.32325e-06	1.53923e-05	0.224897	-0.0767294	-0.207094	-0.0743309
Ptgs2	699	4.26467e-05	0.000136457	-0.0893535	0.117053	0.139363	-0.166357
Dcaf17	699	0.000355459	0.000998243	-0.0468642	0.080664	0.0798667	0.0620601
Pim3	700	1.60672e-10	7.9515e-10	0.164335	0.377569	0.0335074	-0.160165
Nqo2	700	0.0151183	0.0325614	-0.0343274	-0.120524	0.0300708	0.0320172
1700025G04Rik	701	1.79446e-10	8.86091e-10	0.171234	0.380523	-0.128705	-0.0150553
Ak6	701	4.54841e-06	1.61295e-05	0.25536	0.218689	0.209357	0.143566
Socs3	701	4.65493e-05	0.000148411	-0.105113	-0.862619	0.235266	-0.494946
Gatd1	701	0.00152355	0.00392475	0.00815247	0.0033738	0.058455	0.0612325
Itm2c	702	4.88922e-05	0.00015577	-0.516701	-0.958863	0.242961	-0.492525
Tnrc6a	702	0.0154709	0.0332565	0.015449	0.0432489	0.0628484	0.112706
Foxo1	704	2.07859e-10	1.02186e-09	0.153641	0.267887	0.0840506	-0.0513977
Mgat4a	704	3.27733e-07	1.29638e-06	0.0645338	0.11514	-0.0276688	-0.0384927
Cyp2j6	704	5.06389e-05	0.000160874	-0.07112	0.00059224	0.102361	-0.0879562
Il1rn	705	2.10651e-10	1.03444e-09	0.0423814	0.101452	-0.0206403	0.0309079
Rad51d	706	5.41105e-06	1.8992e-05	0.0651344	0.0650884	0.0322735	0.0348255
Glipr1	706	5.17226e-05	0.000164083	-0.0229406	0.0360457	0.107048	-0.0638694
Mpzl3	707	2.4793e-10	1.21483e-09	0.0511643	0.0717425	-0.190095	0.0119045
Dzip3	707	0.00749993	0.0170781	0.0156122	0.0172467	0.0414984	0.0454301
Ldlr	708	9.33984e-06	3.19016e-05	-0.416497	0.274256	0.19348	-0.142208
Sdc1	709	5.79362e-05	0.000182754	-0.0494455	-0.853112	0.248029	-0.3813
Mgat5	709	0.000344389	0.000971444	0.0750649	0.0587389	-0.0329332	0.0595562
Gm20219	710	2.99814e-10	1.46422e-09	0.0605979	0.093929	-0.130614	-0.00442392
Herpud2	711	6.25638e-05	0.000196516	-0.860575	0.123453	0.166454	-0.0789469
Sipa1	711	0.00204501	0.00516354	-0.0899932	-0.0271479	0.0694943	0.0562361
Ttyh1	712	0.000309958	0.000879893	-0.0719615	0.0621438	0.0415544	0.0513834
Dram2	714	0.0170608	0.0364455	-0.0391399	-0.0753942	-0.0762559	0.0484299
Rpl9-ps6	715	6.28347e-08	2.65527e-07	-0.0106551	0.307245	0.121312	0.123502
Eppk1	715	6.30592e-06	2.1977e-05	0.0457212	0.0440717	-0.108906	-0.0425673
Epha7	715	7.17599e-05	0.000223979	-0.354583	0.0301933	0.0775231	-0.034953
Ccnc	716	0.00894338	0.0200877	0.0419528	0.0234609	0.0559456	0.0564573
Opcml	717	5.02545e-10	2.43827e-09	-0.179587	0.145179	0.109789	-0.00851468
Pcdh7	717	7.72226e-05	0.000240021	-0.300323	-0.42682	0.0482665	-0.0774961
Brms1l	717	0.0184975	0.0391392	0.0122236	0.00383747	0.0221182	0.0423476
Kpna2	719	7.32181e-06	2.53383e-05	0.167617	0.0858601	0.115101	0.0944829
Socs1	719	8.08644e-05	0.000249944	-0.0965403	-0.153423	0.0962819	-0.0883188
Eps8l1	720	7.3273e-06	2.53383e-05	0.0457789	0.0495352	-0.105876	-0.0636909
Supv3l1	720	0.0191751	0.0403049	0.00643021	0.0451506	0.0232879	0.0473086
Slc15a2	721	5.77777e-10	2.7972e-09	0.0646626	0.156709	-0.239629	0.0100036
Vps13c	721	0.0192221	0.0403845	-0.0464361	-0.0876939	0.00768237	0.0411098
Npdc1	722	7.91363e-06	2.7239e-05	0.13537	-0.868042	-0.262372	-0.107765
Fzd9	722	8.83407e-05	0.000271358	-0.0973806	0.0555807	0.05605	-0.0680673
Arglu1	722	0.00976866	0.0217984	0.0397791	0.184287	0.101633	0.148766
Prss22	723	6.20043e-10	2.99206e-09	0.0484412	0.0899471	-0.104266	-0.352728
Itfg2	723	8.94411e-05	0.000274549	0.0466492	0.123115	0.111118	0.0114804
Padi4	724	0.0139528	0.0301968	0.00330862	0.00963717	-0.0393684	0.00985502
Apol9b	725	8.41568e-06	2.89224e-05	0.0730639	0.074826	-0.192639	0.00344198
Medag	725	9.37717e-05	0.000286854	-0.572964	-0.199401	0.0861963	-0.273025
Chac1	725	0.0204709	0.0427861	0.0186827	0.0290272	-0.00500332	0.0321691
Fndc4	726	9.53111e-05	0.000291363	-0.129779	-0.0652815	0.0842767	-0.0695002
Med24	726	0.0207602	0.0433502	-0.0712877	0.000978461	0.0262721	0.0498202
Wnt5b	727	7.37581e-10	3.54389e-09	-0.00648942	0.122363	-0.307386	0.00228149
Gm26917	727	7.17999e-07	2.73533e-06	0.149	0.375586	-0.633446	0.15144
Il24	727	9.00963e-06	3.08446e-05	0.0712885	0.0607686	0.0469773	-0.0478077
Slc2a1	728	9.58833e-06	3.27252e-05	0.188061	-0.203463	0.055226	-0.349562
Ptprs	728	0.000102631	0.000311813	-0.0150192	-0.0847582	0.195706	-0.0208037
Glul	729	1.27278e-07	5.26853e-07	0.216292	0.406315	0.0813557	0.0954754
S100a3	730	0.000104725	0.000317525	0.0561461	0.078534	0.085776	-0.026068
Bglap3	730	0.0172285	0.0367333	0.0402366	0.0350477	-0.160985	0.0429435
Plin3	731	1.33116e-08	5.93493e-08	0.0769556	0.257396	0.016998	0.102093
Ap1s2	731	0.00010647	0.000322596	-0.00264225	-0.349179	0.0709552	-0.00515913
Zgrf1	732	1.03368e-05	3.50914e-05	0.0316057	0.030195	0.0214156	0.0110845
Rspo3	732	0.000107687	0.00032584	-0.0738943	0.0480266	0.0637422	0.0274802
Myef2	733	9.09521e-10	4.33263e-09	0.0858735	0.16154	0.11798	0.0832689
Agpat4	733	0.000112561	0.000339666	-0.228275	-0.325251	0.111811	-0.13831
Slc34a2	733	0.00883882	0.0198829	0.0133522	0.015722	-0.0212413	0.0146799
Rhob	734	0.000113439	0.000342085	-0.80194	-0.73872	0.298248	-0.450497
Tmem213	734	0.000174773	0.000513481	0.0379104	0.042334	-0.0444557	0.0296524
Dcaf11	735	9.65832e-10	4.5764e-09	0.0628315	0.158867	-0.0671469	0.00029885
Zbtb7b	735	1.07085e-05	3.6298e-05	0.079741	0.0889336	-0.0386841	0.019763
Lyn	735	0.0118746	0.0261184	0.0179087	0.0457075	-0.0441945	0.040275
Eri2	736	0.000110888	0.000334844	0.0374117	0.0504709	0.034139	0.0332045
Slit2	737	0.000121786	0.000365521	-0.168178	-0.428483	0.084827	-0.07103
Blnk	737	0.00648732	0.0150179	0.0145845	0.0160783	-0.084775	0.0121434
Spns2	738	0.000392201	0.00109571	0.0380165	0.034466	-0.120286	0.0294169
Tap1	739	1.21841e-05	4.10809e-05	0.0951257	0.00111624	-0.10488	-0.0509589
Il4ra	739	0.000123249	0.000369058	0.0178807	-0.199608	0.0952828	-0.0612596
2810474O19Rik	740	1.18785e-09	5.5868e-09	-0.0659208	0.429212	-0.0897433	-0.0286128
Tex36	740	4.75721e-06	1.67897e-05	0.042075	0.0532261	0.0573785	-0.00875259
Ccdc82	741	1.20387e-09	5.65618e-09	-0.379814	0.239587	-0.049184	-0.0824435
Exo5	741	1.27585e-05	4.28879e-05	0.0472623	0.0407539	0.0116862	0.00701796
Akap1	741	0.000129129	0.000385482	-0.00734709	0.0377101	0.0727501	0.00791115
Ang4	741	0.00944038	0.0211294	0.00825882	0.00972465	-0.0520689	0.00908008
Art3	742	0.000129463	0.000386223	-0.0574488	-0.38477	0.090613	0.0249277
Gatm	742	0.0251014	0.051832	-0.0123535	0.00618405	0.00817876	0.0240718
Zbp1	743	1.45132e-05	4.8676e-05	0.0893981	-0.0274294	-0.203016	-0.0441714
Olfr889	744	6.90155e-05	0.000215867	-0.0338728	0.0904674	0.0760429	0.0196854
Fhit	745	8.01708e-09	3.60688e-08	0.0404464	0.137489	0.089278	-0.00206903
Mlph	745	0.00321537	0.00785588	0.032022	0.0431708	-0.175711	0.0312835
Tax1bp1	746	1.7813e-09	8.30777e-09	-0.0687287	0.475378	-0.0814355	-0.229859
Cxcl16	746	1.65705e-05	5.51607e-05	0.191427	-0.0804578	-0.677339	-0.0208921
Ifitm2	746	0.000141808	0.000421355	-0.923116	-1.88368	0.308337	0.0349605
Gna14	747	1.93526e-05	6.38492e-05	0.0493511	0.0317544	-0.0533914	-0.0497243
Mmp14	747	0.000155807	0.000460494	-0.917824	-1.94505	0.185599	-0.0248447
Fyb	747	0.026196	0.0538674	-0.127395	0.0364301	-0.0165836	0.0463405
Chka	748	1.81938e-09	8.47648e-09	-0.264123	0.389701	-0.302062	-0.215396
Nsrp1	749	1.43346e-08	6.36555e-08	0.138152	0.279929	0.17962	0.00128125
Selenbp1	749	0.0272569	0.0558685	-0.0491059	0.0147712	-0.0709584	0.0347108
Gpr160	750	9.88758e-06	3.37207e-05	0.0405587	0.0489505	-0.0905419	-0.0164453
D10Wsu102e	751	0.000174012	0.000511921	-0.0197082	0.116862	0.142532	0.0568883
Tmem181a	752	2.18317e-05	7.1604e-05	0.0617463	0.0442291	0.0198445	0.0236706
Gm15491	752	0.000257611	0.000741694	0.0256888	0.0263044	0.0342015	0.0262246
Sirt5	753	2.19969e-05	7.20929e-05	0.0588443	0.0654041	0.0263701	0.044084
Herpud1	753	0.000192504	0.000563346	-0.307773	-0.331916	0.147414	-0.066221
Slc12a4	754	0.000208799	0.000607836	-0.0226171	-0.130037	0.074946	-0.00591167
Crispld1	755	0.000215304	0.000625957	-0.927231	-0.240976	0.0584454	-0.0889261
Eya3	755	0.0287788	0.0585033	0.0104243	0.0369982	0.00861936	0.0154461
Tspan15	756	0.029812	0.0603831	-0.159907	-0.396975	0.035666	0.0592033
Hip1r	757	2.52504e-09	1.17029e-08	0.0501021	0.11717	-0.113864	-0.0188133
Polr1b	757	0.000222539	0.000645304	0.0300456	0.0420271	0.0565866	0.0379992
Amt	757	0.0299153	0.06051	-0.0161078	0.00953201	-0.00100754	0.00422618
Ptprj	758	0.0303101	0.0612527	-0.0103512	-0.0606925	-0.0204168	0.043429
Ank3	759	2.72741e-09	1.26015e-08	0.0330487	0.0845147	-0.0990617	-0.00156803
Tacc1	760	0.000253307	0.000730718	-0.0376453	-0.269725	0.159494	-0.0671493
Carmil1	761	2.85039e-09	1.31425e-08	-0.00142914	0.132033	-0.00669828	0.044323
Fam3a	761	0.0017084	0.00437059	0.0679686	-0.0675853	-0.0341697	0.0536141
Lmo7	762	3.05162e-09	1.40558e-08	0.0162802	0.16468	-0.171509	0.0339957
Ank2	762	0.000256368	0.000738591	-0.0681954	-0.260791	0.040045	0.0129186
Gm43672	762	0.031587	0.0636024	0.00644784	0.011688	-0.00260228	0.0185895
Nme3	763	0.0330403	0.0661995	0.0232543	0.0447411	0.00217277	0.0495943
Sfrp1	764	2.80267e-05	9.11839e-05	0.165949	0.183363	0.130512	-0.0300179
Ikzf2	765	3.55902e-09	1.63421e-08	0.00700866	0.119885	-0.0465207	-0.00259575
Cc2d1a	765	2.91599e-05	9.45943e-05	0.0384243	0.0127348	0.00599383	0.0122945
Naxd	765	0.00169404	0.00433886	0.143699	0.109067	-0.133784	0.126578
Flna	766	3.11429e-05	0.000100661	0.232645	-0.145125	0.150228	0.0760342
Vps53	766	0.00516641	0.0122205	0.0458474	0.0850442	-0.0438087	0.0483417
Prr15l	767	6.68784e-05	0.00020933	0.0314432	0.0402328	-0.0856671	0.0261364
Wdhd1	768	0.000279997	0.000801482	0.0212403	0.0128329	0.0441044	0.015493
Coro2a	769	0.00155704	0.0040087	0.0337997	0.0483503	-0.0247797	0.0464024
mt-Nd6	770	0.000297167	0.000846822	0.0539668	0.0284299	0.10037	0.0531131
Col5a2	771	0.000298841	0.000851048	-1.48655	-3.0013	0.110939	-0.14636
Wnk1	772	0.000310656	0.000881313	-0.586007	-0.0769841	0.168191	-0.110277
Appl2	772	0.0362677	0.0716984	-0.0924842	-0.0381777	-0.111284	0.0263911
Hsph1	773	0.000316025	0.000895404	-0.226344	0.102931	0.209413	-0.213516
Mylpf	773	0.0181806	0.0385051	0.0324685	0.0251915	0.0303582	0.0314802
H6pd	774	0.036459	0.0720445	-0.00592813	-0.0870588	-0.0322032	0.0145759
Gramd3	775	4.62397e-05	0.00014753	0.129014	0.0230334	0.0633198	-0.0576042
Pigh	775	0.000290423	0.000828133	0.0481408	0.0547568	0.039454	0.0356968
Clic6	776	0.0100814	0.0224738	0.0221448	0.0285365	-0.0577958	0.0223386
Sbsn	777	7.10781e-09	3.22057e-08	0.105594	0.186437	-0.563495	0.00862303
Fuk	777	0.00146819	0.00379311	0.00359866	0.0296486	0.0142766	0.0177999
Daam1	778	7.18656e-09	3.24964e-08	0.0586696	0.181391	-0.0943075	0.0112208
Chpt1	778	0.0378277	0.0742878	-0.0348577	-0.0361158	-0.14212	0.0554759
Gjb4	779	7.44338e-09	3.36235e-08	0.0690491	0.10885	-0.0274031	-0.219881
Akap9	780	7.99998e-09	3.60282e-08	0.0216618	0.33387	-0.119445	-0.0773641
Klhl23	781	0.0286428	0.0582801	0.00300788	-0.0062817	0.0255839	0.027946
Snhg6	782	8.0927e-09	3.63722e-08	-0.0645939	0.360371	0.17191	0.0538575
Sntb2	782	0.00038055	0.00106535	-0.615866	-0.727004	0.116315	-0.124901
Eif4ebp2	782	0.000861164	0.00228856	0.105211	0.171582	0.139922	0.0911965
Cast	783	5.66243e-05	0.000178742	0.171825	-0.0679493	-0.207549	-0.0819432
Sox8	784	0.000388126	0.00108519	0.0421584	0.0645755	0.0707271	0.00861454
Ntn1	784	0.0407967	0.0797317	0.00989474	-0.0339558	-0.0591868	0.0207821
Taf4b	785	0.000392379	0.00109571	-0.117108	0.115562	0.102396	-0.0849891
Exoc1	785	0.00214151	0.00540108	0.0758301	0.0429368	0.00674845	0.0526309
Lrrc8d	786	1.08407e-08	4.85761e-08	-0.0294499	0.11243	-0.00725493	-0.033057
Tppp3	786	0.00039304	0.00109687	0.0711517	-0.947287	0.192399	0.0277795
Hoxb4	787	6.4906e-05	0.000203299	0.0562914	0.0275014	0.0207416	-0.0170483
Gm26782	788	0.000426276	0.00118442	0.00939216	-0.00195794	0.0401567	0.0145226
Herc2	788	0.0416073	0.0811735	-0.0345201	-0.0904997	0.00850033	0.0581315
Fam110a	790	1.28053e-08	5.71492e-08	-0.0351705	0.213882	-0.149157	-0.081487
Rbms3	790	0.000445151	0.00123149	-0.109838	-0.31111	0.0634745	-0.104972
Muc1	791	7.20238e-05	0.000224646	0.0482582	0.0526121	-0.226031	0.010105
Adamts7	791	0.000470146	0.00129742	0.00154577	-0.0653241	0.0425582	0.0185642
Parp9	791	0.00158917	0.00407962	0.0453912	-0.0524389	-0.124649	0.0318478
Irs1	792	0.0212034	0.0442134	0.0216156	0.053965	-0.00285061	0.0427153
Adamts14	793	0.000485853	0.00133745	-0.0145522	-0.0718722	0.0170217	0.00786387
Plekha6	793	0.0427115	0.0829643	-0.0182121	-0.0894354	-0.0878308	0.0185605
Grpel2	794	1.16105e-07	4.82848e-07	0.0991007	0.200895	-0.365604	0.0843301
Gm26909	795	0.000487422	0.00134094	0.0360575	0.0421775	0.04709	0.0197817
Esm1	796	8.66734e-05	0.000266421	0.0468385	0.0171021	-0.0674318	-0.019107
CT025619.1	796	0.000507664	0.00139318	-0.230091	-0.057557	0.0461961	-0.0133226
Gm15706	796	0.0126148	0.02761	0.0313101	-0.00441211	0.0212738	0.0203556
Fchsd1	797	9.12463e-05	0.000279705	0.0278309	0.0133802	-0.0243197	0.00163741
Abl1	797	0.0221101	0.0460178	-0.0367386	0.0321627	0.0578518	0.0527821
Plin2	798	9.16014e-05	0.0002806	0.117305	-0.511198	-0.111988	0.126339
Acvr2b	798	0.000154713	0.000457564	0.0466173	0.0253765	0.0466452	0.0366491
Rab33b	798	0.000516715	0.00141628	0.0414148	0.0792626	0.0825654	-0.0120284
4932422M17Rik	799	1.88855e-08	8.30364e-08	0.0237556	0.0925433	0.0531766	0.0104714
Sema5a	799	0.000519381	0.00142271	-0.115734	-0.0424526	0.0999352	-0.107985
Mpzl1	799	0.0453031	0.0874264	-0.0611513	0.0307712	-0.0401678	0.109671
Arg2	800	1.99951e-08	8.78287e-08	0.033334	0.0605384	-0.0806437	-0.0270867
Tubgcp2	800	0.00286916	0.00707207	0.0164264	0.065722	0.0479451	0.0472753
Hist1h3d	801	0.00010196	0.000310199	0.0447503	0.0349699	0.00395848	0.00865423
Inf2	801	0.000526852	0.00144155	0.078262	0.0762248	0.119688	0.0347822
Mettl22	801	0.011487	0.0253707	0.028672	0.0320902	0.0148833	0.0248538
Rab23	802	0.0130621	0.028533	0.000554233	0.0328454	0.0608535	0.0502038
Il1rap	803	2.38893e-08	1.04419e-07	0.00153808	0.119161	0.027222	-0.02795
Prss23	803	0.000534116	0.00145858	-0.368189	-1.06957	0.0679613	-0.0864846
Tenm4	803	0.0373429	0.0734977	-0.0285081	0.0368044	0.00981693	0.03623
Map6	804	0.000550943	0.0015027	-0.144668	-0.154758	0.0329609	-0.00743991
Ralgapb	805	0.0493376	0.0943942	0.0187552	0.026646	0.0114519	0.0219874
Dusp7	806	0.000116776	0.000351432	0.11895	0.122158	0.0752553	-0.179397
Col14a1	806	0.000571474	0.00155584	-1.118	-0.0794215	0.0854112	-0.162636
Farp1	806	0.049451	0.0945706	0.0362474	-0.0643864	-0.00950465	0.0400798
Prdm5	807	0.000579422	0.00157555	-0.103626	-0.0411972	0.0376017	-0.00686383
D730003I15Rik	808	0.000121669	0.000365417	0.0542214	0.0270957	-0.0170927	0.0268886
Foxi1	808	0.0258677	0.0533154	0.00817703	0.0238156	-0.0240985	0.0175669
Col4a6	809	3.31042e-08	1.42874e-07	0.0381032	0.0737461	-0.0362346	-0.0940531
Ccdc166	809	0.000601583	0.00163481	0.0216164	0.0160572	0.0317935	0.016856
Inppl1	809	0.0367436	0.0724784	0.0543392	0.0165533	-0.0480268	0.0576927
Ceacam10	810	3.3612e-08	1.44925e-07	-0.087553	0.172664	-0.161626	-0.0239416
Rhbg	810	0.00597505	0.0139627	-0.00654076	0.0165082	-0.065196	0.0128081
Prkaa2	811	0.00186922	0.00475744	-0.00233144	0.0199093	-0.0146072	0.00724413
Myo5b	812	1.37223e-07	5.64349e-07	0.0361468	0.0562772	-0.0419669	0.0271864
2310001H17Rik	813	3.74968e-08	1.60742e-07	0.0375361	0.105095	-0.0252507	0.0341772
Phkg2	813	5.52419e-07	2.13213e-06	0.119192	0.172431	0.0599178	-0.0107093
Depdc5	813	0.00064671	0.00174997	0.0158453	0.0310371	0.0288123	0.0216477
Zwint	813	0.0523931	0.0996834	-0.0916721	-0.021244	0.0019948	0.0925875
Hsd11b1	814	0.0524212	0.0996943	-0.197049	-0.180486	-0.0158943	0.0250777
Nup155	815	5.76591e-06	2.01581e-05	0.0521367	0.0931152	0.0682311	0.0442175
Aqp3	816	5.29531e-06	1.86004e-05	0.0655052	0.0762233	-0.0659996	-0.241048
Sacs	816	0.000773074	0.00207301	-0.0677868	-0.0741834	0.0305127	-0.0109679
Mns1	816	0.0175798	0.0373749	0.0408112	0.0281446	0.0312321	0.0333371
Sorl1	817	4.95209e-08	2.10866e-07	0.0256526	0.0653422	-0.0652175	-0.0035832
Asap1	817	0.000779259	0.00208708	-0.830095	-0.595853	0.111928	-0.00151319
Oas2	817	0.0106453	0.0236009	0.0279548	0.0349852	-0.127962	0.0285142
Gigyf2	818	5.43708e-08	2.31297e-07	0.13563	0.246516	0.0922083	-0.0041569
Pdcd4	818	8.31643e-05	0.000256875	-0.015747	0.197323	0.0850621	0.114691
Ccdc32	818	0.000811158	0.00216861	0.00159743	0.0198242	0.0687057	0.0290806
Nebl	819	5.55832e-08	2.35778e-07	-0.0793994	0.117319	-0.175746	-0.00646075
Vars2	819	5.4294e-05	0.000171751	0.0409508	0.0616931	0.0280883	0.0339229
Rnf150	819	0.000270206	0.00077495	0.0368948	0.00993319	0.0497674	-0.0663794
Arhgef26	820	5.67785e-08	2.4062e-07	-0.00758841	0.140092	0.0334883	0.0121329
Ddit4l	820	1.47936e-05	4.9552e-05	-0.125151	0.117716	0.0812415	-0.00624415
Utf1	821	1.61006e-06	5.94626e-06	0.0521314	0.0563297	0.0258492	0.0238528
Pfn2	821	0.0540041	0.102355	0.0315887	0.0622021	0.036579	0.0631646
Kcnk5	822	5.8088e-08	2.45935e-07	0.0617471	0.0963794	-0.0208982	0.0405283
Slc5a1	822	0.00138316	0.00358175	0.00911558	0.0197521	-0.0355033	0.0139484
Prkdc	823	0.000832281	0.00221709	0.00842167	0.0242289	0.0346813	0.0256308
Angpt2	823	0.0546166	0.10339	-0.0193231	-0.27387	-0.000554351	0.0123536
Casp2	824	7.07719e-06	2.45497e-05	0.0535031	0.0969041	0.0696245	0.0550193
Cep85	824	0.000179512	0.00052671	0.0401294	-0.00263903	0.00800366	0.00867672
Pigo	825	1.64558e-05	5.48199e-05	0.0249406	0.0512591	-0.0067949	0.027166
Tmem120a	825	0.000840706	0.00223686	-0.282135	0.102303	0.142893	-0.0614371
Fbrsl1	827	7.78009e-08	3.27838e-07	-0.093171	0.173962	-0.0630233	0.0269252
Sobp	827	0.000850726	0.00226217	-0.234081	-0.208521	0.0365543	-0.0618998
Zfhx4	827	0.0558597	0.105468	0.0160405	0.0349209	0.017665	0.0521283
Gm33651	828	7.93934e-08	3.33917e-07	-0.0149955	0.0870852	0.0897715	0.0204145
Bst2	829	0.000188669	0.000552486	0.289358	0.0840845	-0.852947	0.0642491
Ptk2b	830	0.000152778	0.000452141	0.0559803	0.0629963	-0.0367401	-0.0284038
Col15a1	831	0.00091621	0.00243049	-0.222654	-2.10495	0.0572215	0.0104087
Abcb10	831	0.0283636	0.0577648	0.0297336	0.0199726	-0.00563007	0.0282761
Ak1	832	0.000920768	0.00244113	-0.170773	-0.869282	0.0710475	-0.22294
Nkd2	833	7.79884e-05	0.000242232	-0.197171	0.208621	-0.0968234	0.107588
Eya2	833	0.000205228	0.000598616	0.0550498	0.0636866	-0.0474824	-0.119418
Tmem176b	834	9.08668e-08	3.80735e-07	-0.622056	0.510098	-0.419275	-0.379396
Dmrta2	835	9.57758e-08	4.00174e-07	0.0255314	0.0497933	-0.0125787	0.0117606
Cds2	835	0.000218825	0.00063495	0.0814798	-0.0180612	0.0807363	0.0590997
Gmcl1	835	0.000476412	0.00131308	0.0151486	0.107421	0.0817009	0.0110995
Gbp7	835	0.0590142	0.110673	-0.0463117	-0.149358	-0.0435446	0.0287112
Gstt1	836	1.02472e-07	4.2735e-07	0.0652056	0.148676	-0.190395	0.0309502
Arhgef28	836	9.27649e-07	3.50148e-06	0.0761949	0.0986296	-0.0376751	-0.0120781
Xab2	837	1.13945e-07	4.74754e-07	0.0722548	0.120827	0.0182478	0.0213597
Narfl	837	0.000350535	0.000986281	0.0350476	0.0588022	-0.00767713	0.0278284
Rnase1	838	0.000114693	0.000345399	0.0227552	0.0822181	-0.378659	0.0423917
Wisp2	839	0.0606963	0.11339	-0.00932723	-0.161791	-0.0441823	0.0108523
Fbln5	840	0.00105901	0.00278774	-0.453221	-0.885929	0.0606916	-0.00290817
Capn15	840	0.00556641	0.0130902	0.0560675	0.0808735	0.0657142	0.0561073
Ddx55	842	2.51701e-06	9.16662e-06	0.104243	0.146907	0.089511	0.0542461
Pros1	842	0.00106957	0.00281219	-0.137559	-0.840708	0.06906	-0.0890992
Lrrc8e	843	1.69098e-07	6.87818e-07	0.00634085	0.0565602	-0.0735153	-0.0233892
Plbd1	843	0.00012293	0.000368459	-0.0292018	0.0355501	0.0334398	-0.0376821
Scd1	843	0.0559317	0.105559	-0.129349	0.0669653	-0.118239	0.0713875
Peli2	844	0.00110378	0.002897	-0.0936481	-0.0465868	0.0475433	-0.0145188
Car6	844	0.0628683	0.117112	-0.112968	0.0284322	0.030248	0.0476437
Ttc7	845	1.74782e-07	7.09645e-07	0.0391472	0.0956105	-0.0117263	0.0363902
Hspa1b	845	0.000269788	0.00077425	0.123053	-0.115428	-0.191601	-0.170162
Snhg9	845	0.00198448	0.00501515	0.0872535	0.0933241	0.00158006	0.0658076
Slc39a4	847	1.02264e-06	3.84373e-06	0.0593937	0.083419	-0.059667	-0.165585
Ubd	847	0.0254512	0.0525056	0.0185304	0.031579	-0.0432763	0.0256929
Nedd4l	848	1.99547e-07	8.07252e-07	-0.060629	0.106635	-0.231057	-0.0326953
Cd55	848	0.000142627	0.000423509	0.0785236	0.0890587	-0.086096	-0.123339
Kctd1	848	0.00115918	0.00303705	-0.315557	0.125719	0.110757	-0.19634
Trpv4	849	2.07065e-07	8.36143e-07	0.0181235	0.0799584	-0.0135345	-0.0361149
Trmo	849	0.000825381	0.00220277	0.0373262	0.0505595	0.0253298	0.0338038
Efnb1	849	0.00116634	0.00305223	0.0343458	0.00692927	0.108403	-0.126914
Lgr6	850	2.15555e-07	8.6964e-07	0.06794	0.101735	-0.0147812	-0.1681
AW112010	850	0.06649	0.123189	0.0113892	-0.0340724	-0.303618	0.033894
Amd1	851	2.17611e-07	8.77139e-07	-0.0895136	0.30222	0.178696	-0.0277371
Zfp146	851	0.0011956	0.00312696	-0.000870002	0.00166314	0.0284178	0.0163368
Hcar2	852	0.000300743	0.000855371	0.0531978	0.0604149	-0.22837	-0.154209
Lipt1	852	0.00416604	0.0100463	0.0187734	0.0332278	0.0149536	0.0205682
Plekha2	853	0.000307896	0.000874598	0.0567409	0.0357657	0.000607888	0.0369435
Cdc14b	853	0.00129518	0.00337353	0.025046	0.0165313	0.0518234	0.00508854
Cdkl5	854	2.74942e-07	1.09632e-06	0.0389276	0.0757284	0.0107212	-0.0124984
Pstpip1	854	7.43843e-06	2.56828e-05	0.0196006	0.0366061	0.0141074	0.0224735
Rin2	855	2.8604e-07	1.13752e-06	-0.0161287	0.207752	-0.173704	-0.0609821
Ccdc66	855	2.88286e-05	9.3588e-05	-0.0163191	0.101712	0.0745271	0.0216582
Scrib	856	4.71822e-06	1.66785e-05	0.0992192	0.135198	0.0402641	0.0361191
Ap3m2	856	0.070713	0.130093	0.0139788	0.0121401	-0.0048035	0.0173479
Rnf128	857	3.02725e-07	1.20172e-06	0.0217607	0.093102	-0.00559711	-0.0422688
Ica1	857	1.3556e-06	5.03573e-06	0.0111	0.0729861	-0.0437285	0.0355364
Osr1	857	0.000318623	0.00090219	0.0926651	-0.050965	0.0581179	-0.0333059
Dph5	857	0.000430867	0.00119494	0.0498025	0.102775	0.0805573	0.0373432
Crtap	858	0.00149645	0.00386388	-0.165758	-0.910302	0.100481	0.0379655
Daxx	859	0.000341606	0.000964204	0.078852	-0.0118625	-0.0291948	0.0114505
Edn1	860	0.010303	0.0228989	0.0138833	0.0453868	-0.199422	0.0325981
Setdb1	861	3.68341e-07	1.44929e-06	0.0661714	0.151223	-0.0335786	0.0552491
Trim24	862	3.36353e-07	1.32812e-06	0.0185113	0.151919	0.0355009	0.0149527
Cdk20	862	0.00156371	0.00402123	0.0153919	0.0111433	0.037501	-0.0108389
Cr1l	862	0.0747876	0.136911	0.0155895	-0.228117	-0.0580037	0.0695103
Hmgcr	863	0.000345459	0.000973845	0.100556	-0.161682	0.08893	0.0469725
Polr3f	863	0.0694393	0.127961	0.00327633	0.0471291	0.014643	0.0436568
Cd164l2	864	3.52637e-07	1.38995e-06	0.0377822	0.0817311	-0.121972	-0.0136238
6030458C11Rik	864	3.95912e-06	1.41638e-05	0.00921208	0.111495	0.0731553	0.044368
Acap1	865	0.000348286	0.000980572	0.0249289	0.023768	0.0020567	0.00264587
3010003L21Rik	865	0.00162986	0.00417926	-0.0236445	0.0737934	0.0662427	0.012591
Hmg20b	865	0.0755077	0.138059	0.0117705	-0.23022	0.0402211	0.0845218
Arhgef1	866	7.19145e-07	2.73533e-06	0.106649	0.202078	0.0612811	0.0701004
Ier2	867	0.00177571	0.00452978	-0.102948	0.0209565	0.233942	-0.181758
Ccdc94	867	0.00990579	0.0220933	0.0547699	0.0427874	0.0203045	0.0407829
Thoc1	868	9.11613e-06	3.11853e-05	0.0407743	0.170005	0.0941672	0.067292
Foxp1	869	5.33077e-05	0.000168991	-0.643114	0.26826	0.198764	-0.145243
Ctbp2	869	7.02143e-05	0.000219309	0.0664043	0.178257	0.101163	0.0981958
Smim22	870	8.63933e-05	0.000265743	0.0335384	0.0496757	-0.289355	0.0278732
Cachd1	870	0.00193188	0.00490011	-0.375509	-0.294017	0.0428633	-0.0275065
Trib1	871	4.24901e-07	1.66447e-06	-0.549325	0.351764	-0.103963	-0.42214
Wdr92	871	0.00038163	0.0010677	0.0642553	0.0624317	0.0519965	0.0301965
Apoe	871	0.00194922	0.00494127	-1.85792	0.315706	0.36825	-1.27509
Aig1	871	0.0779859	0.142123	-0.156148	0.082937	0.0205726	0.0605597
Vps37b	872	4.32558e-07	1.68705e-06	-0.075885	0.232228	-0.305598	-0.232529
Il13ra1	872	0.000983128	0.00259565	0.0863952	0.0386542	0.0874717	-0.189546
Rbm45	872	0.0778644	0.14196	0.00499767	0.00919897	0.0172373	0.0170164
2610035D17Rik	873	4.73943e-07	1.8404e-06	0.0371007	0.125884	0.0168796	0.00861342
Ang2	873	0.000150025	0.00044429	0.0293042	0.0309816	-0.000748179	-0.0746272
Tceal8	873	0.00196763	0.00498228	-0.132999	-0.455102	0.184274	0.059913
Cited2	874	5.07907e-07	1.96886e-06	-0.352119	0.42139	0.240924	0.13508
Mrm1	874	0.00197497	0.00499518	0.0196081	0.0159634	0.0207616	0.0142918
Acsbg1	874	0.0392641	0.0769389	0.0199477	0.015886	-0.0196393	0.0185291
Parm1	875	5.35208e-07	2.06929e-06	0.0543659	0.118726	0.0146089	-0.187921
H2-Q4	875	0.000399574	0.0011144	0.0910423	-0.161695	-0.545561	-0.0693824
Mars2	875	0.00099953	0.00263738	0.00580488	0.0823035	0.0703245	0.00159163
Fam210b	876	5.47223e-07	2.11391e-06	0.00983374	0.136508	-0.0679962	0.0281614
Krtdap	876	0.000403021	0.00112191	0.0376883	0.0328933	-0.00362561	0.00475527
Ccdc84	876	0.0199119	0.041755	0.0560099	0.061734	0.0582141	0.0485909
Pde9a	877	2.87943e-06	1.04268e-05	-0.00931831	0.051931	-0.0686546	0.0210206
Erich1	877	0.000205497	0.000599008	0.0447327	0.0646478	-0.0199632	0.0103338
Pdgfra	877	0.00217139	0.00547024	-0.228893	-0.288816	0.0447287	-0.0433752
Ssc4d	878	6.37031e-07	2.44809e-06	0.0187281	0.0563935	0.0117976	-0.0270643
Rab26os	878	0.000424949	0.00118148	0.0986173	0.096864	0.0338443	0.0237024
Fam107b	879	6.48963e-07	2.49179e-06	0.162083	0.265934	-0.197387	-0.187469
Ppfia3	879	1.82773e-05	6.05256e-05	0.0545087	0.0744841	0.010696	0.0224972
8430408G22Rik	879	0.0141367	0.0305357	0.0364493	0.0713822	-0.094893	0.0525116
Fam84a	880	6.66153e-07	2.5534e-06	0.0296156	0.0640034	0.00787769	-0.0131913
Phkb	880	0.000439521	0.00121819	0.0516847	0.0438678	0.0051449	0.0136471
Klrb1a	880	0.00220619	0.00555162	0.0205281	-0.0617895	0.0400486	0.0152611
Bche	880	0.0846473	0.153198	-0.0426006	0.00258448	-0.00658002	0.00507406
Gxylt2	881	0.00221164	0.00556219	-0.0935244	0.0608238	0.0701327	-0.0305668
Ctsh	881	0.0861522	0.155605	-0.0675503	-0.871284	-0.424897	0.0772054
Dkkl1	882	0.00046698	0.00128948	0.0520979	0.0342225	-0.257329	-0.0265935
Cog7	883	0.00161911	0.0041541	0.048079	0.00774039	-0.00010861	0.0350674
Creb3l2	883	0.00231131	0.00578998	-0.237623	-0.220278	0.118409	-0.117011
Tubb3	884	0.00235268	0.00589029	0.0263914	-0.18716	0.0468063	-0.0164279
Cyb5rl	884	0.0290802	0.0590621	0.0300869	0.0332548	-0.0315254	0.028974
Hbegf	885	7.18141e-07	2.73533e-06	-1.27387	0.439903	-0.267081	-0.554769
Bex2	885	0.000148941	0.000441668	-0.022978	0.0808523	0.0668493	0.0528992
Nr2f2	885	0.00246554	0.00615556	-0.0993956	-0.274207	0.0342626	-0.0205739
Rnf113a1	887	7.51229e-07	2.85493e-06	0.0289747	0.0670519	0.0390165	-0.00148259
Apbb1ip	887	0.00255516	0.0063686	-0.0968565	-0.355725	0.0318894	-0.0124068
Btbd3	887	0.0077212	0.0175281	0.0175756	0.0996165	0.0598566	0.0547578
Rab34	888	0.00256018	0.00637755	-0.149257	-0.0826555	0.142929	-0.106961
Bc1	889	0.00256855	0.00639481	-0.399475	-0.0750438	0.100215	-0.0659664
Cenpj	890	0.00028059	0.000802664	0.03119	0.0395103	0.0087988	-0.00368593
Zfp703	890	0.00257959	0.00641872	0.0662136	0.0213646	0.118001	-0.358288
Pomt1	890	0.0894651	0.160741	0.0237688	0.024321	0.00360752	0.0238371
Ier3	891	8.21528e-07	3.10882e-06	0.103598	0.618929	0.0237922	-0.67928
Zfp292	891	2.40952e-06	8.79676e-06	0.0668422	0.192126	0.0997811	0.0431205
Lgals3bp	891	0.000565516	0.00154056	0.11338	-1.09598	-0.262899	-0.0155887
Sec14l2	891	0.000766882	0.00206013	0.0170496	0.0537497	-0.0503727	0.0298609
Atf7ip	893	0.00132677	0.00344974	-0.0331307	0.120363	0.0979387	0.00498099
Tc2n	893	0.0935491	0.167269	0.00950725	0.015922	-0.0236677	0.0168814
Asprv1	894	9.95243e-07	3.75027e-06	0.0166711	0.057028	-0.221977	-0.0834943
Tril	894	0.00265565	0.00658956	-0.118285	-0.227328	0.0232684	0.0078507
Nav3	894	0.00805752	0.0182544	0.0329535	0.02679	0.0599628	0.0457204
Zfp51	895	0.000605572	0.00164264	0.0534163	0.0521858	-0.00907529	0.0187682
Lbh	895	0.00266247	0.0066026	-0.579443	-0.196534	0.131181	-0.0935959
Klf10	896	1.08134e-06	4.04731e-06	-0.297276	0.258671	0.0882624	-0.46374
Pelo	896	0.00156122	0.00401715	0.0156079	0.0128175	0.037436	0.0214693
Kat2b	896	0.0941727	0.168249	-0.0387499	-0.0411627	-0.0491214	0.0260353
Bloc1s1	897	0.0954559	0.170269	-0.122937	-0.330917	0.00815032	0.100265
Gsn	898	0.00272198	0.00673538	-0.748766	-2.40396	0.146413	-0.572939
Mpv17	898	0.0962177	0.17149	-0.0567132	-0.104446	0.00931864	0.0255069
Rassf10	900	1.3523e-06	5.02768e-06	0.0083739	0.0525254	-0.00479158	-0.0245826
Eogt	900	0.00276962	0.00683808	0.0165216	0.0454215	0.071413	-0.0209896
Ppp1r12c	901	0.00282096	0.00696097	-0.0618748	-0.0614156	0.0888423	-0.0110498
Capn9	901	0.015777	0.033898	0.00231859	0.0160753	-0.0126241	0.00807714
Zfp36l2	902	0.000240704	0.000696165	-0.278145	0.231072	0.175776	-0.326496
Eva1c	903	1.38913e-06	5.15598e-06	-0.027604	0.0630166	0.0333715	-0.0387575
Arxes1	903	0.00299477	0.00736008	-0.0463017	0.0201926	0.0231281	0.00842604
Wdr70	904	3.60555e-05	0.000116118	0.0350204	0.137476	0.0916775	0.0686984
Col27a1	904	0.00299654	0.00736008	-0.227965	-0.486599	0.0560946	-0.0683564
Msantd2	905	0.102785	0.181885	-0.0136248	0.0207888	0.0200325	0.0300129
Marveld2	906	0.000122739	0.000368133	0.0425444	0.0514107	-0.114072	0.013325
Serf1	906	0.00310168	0.00760313	0.0690446	-0.456293	0.170743	0.107824
Usf1	906	0.104868	0.184836	0.0120975	0.00551677	-0.00572005	0.0148316
Gsdme	908	2.14187e-06	7.84531e-06	0.00711448	0.0997284	0.0354283	0.00985784
Csn1s2a	908	7.70636e-05	0.000239694	0.183868	0.283799	-0.203082	0.107371
Ext1	908	0.00311237	0.00762514	-0.393775	-0.511491	0.0872076	-0.0840448
Foxp4	909	2.34254e-06	8.57327e-06	0.0244571	0.187567	-0.0209207	-0.0932185
Itpr3	909	0.000769519	0.00206597	0.0589172	0.0620134	-0.0601057	0.0194091
Tpst2	909	0.00317983	0.00777758	-0.25878	-0.0463021	0.149318	-0.0479177
C1galt1c1	909	0.107152	0.188489	0.0329852	0.036604	0.00942275	0.0441399
Hist1h2ac	910	0.000770966	0.0020686	0.0457277	0.0369591	-0.0214509	-0.0222435
Mzt2	910	0.0031871	0.00779107	-0.170824	0.100675	0.113354	-0.0077798
Nrgn	910	0.0419213	0.0816786	-0.337784	-0.0724799	0.0278514	0.0244816
Epb41	911	2.40953e-06	8.79676e-06	0.0604892	0.0914623	-0.0733358	-0.0469726
Rflna	911	8.39056e-05	0.000258627	-0.12195	0.0877342	0.0669279	-0.0717456
Pinlyp	911	0.000400943	0.00111682	0.0258646	0.030902	-0.0310118	-0.0436054
Marcks	912	0.00330338	0.00805323	-0.914945	-1.46216	0.172375	0.108713
Clca3a2	913	0.000301066	0.000855743	0.0475958	0.0606723	-0.0944491	0.0198412
Hmgcs1	913	0.0032812	0.00800355	0.0952907	-0.367163	0.0773782	0.0197353
Ephb4	915	2.60984e-06	9.48916e-06	0.0149548	0.11777	0.0426518	-0.0711116
Kif26b	915	0.0218964	0.0455945	-0.0777122	-0.0948823	0.040459	0.034965
Lgr4	917	0.000684761	0.00184956	0.0651079	0.0778467	0.0404432	-0.031096
Qser1	917	0.0143805	0.0310173	-0.0267758	0.092025	0.0356108	0.06454
Pnpla2	918	7.90249e-06	2.72324e-05	0.0665594	0.154188	-0.126975	0.0705155
Il19	918	0.00093114	0.00246569	0.0304666	0.0250626	0.027011	-0.0378079
Mllt11	918	0.00120373	0.00314453	0.125542	0.0780679	0.118307	-0.12797
Smpdl3a	919	2.89034e-06	1.04578e-05	-0.195807	0.2136	-0.222261	-0.0462127
Hist3h2ba	919	7.90371e-05	0.000245067	0.0458775	0.0459015	-0.00112815	0.0288519
1600014C10Rik	920	1.11732e-05	3.78158e-05	0.138171	0.175186	0.11784	-0.116924
F830016B08Rik	920	0.114863	0.200863	-0.0173707	-0.229618	-0.0163791	0.00566249
Mtss1	921	2.99804e-06	1.08299e-05	-0.00451691	0.232006	-0.0754206	-0.153751
Bgn	921	0.0035741	0.00868469	-2.46715	-4.5872	0.154558	-0.458927
Hcfc1r1	922	0.0010008	0.00263918	0.170864	-0.254402	-0.207368	-0.376682
Enpp5	923	3.40055e-06	1.22343e-05	-0.000213073	0.0959489	-0.156084	-0.0282601
Mical1	923	0.00373984	0.00906765	-0.0341757	-0.0363424	0.0441733	-0.0177307
Ccs	924	0.000957117	0.00252847	0.151296	0.163439	0.0237734	0.070274
Atf5	924	0.00326723	0.00797384	0.123016	-0.253557	0.0322601	0.0862479
Efna2	924	0.00396133	0.00957339	0.00853344	-0.0423888	0.0300275	0.00413656
B4galnt1	925	0.00113314	0.00297057	0.0611016	-0.135647	-0.125879	-0.00828327
Cd34	925	0.00398092	0.00961552	-0.118826	-0.194242	0.0311935	-0.00396457
Rsbn1	926	3.77358e-06	1.35326e-05	-0.0845302	0.233253	-0.0698877	-0.17482
Kmt5c	926	0.0058989	0.0138098	0.0327191	0.0492385	0.0138555	0.0211999
Hist4h4	927	3.82663e-06	1.37008e-05	0.0438559	0.0782969	-0.0295661	0.00764557
Pcx	927	0.122601	0.213557	-0.0164845	-0.00762547	-0.0109146	0.0144453
Serpini1	928	0.00407611	0.0098401	-0.162833	-0.211619	0.0494017	-0.0466663
Hist2h3c1	929	0.00120522	0.00314656	0.0255346	-0.0025169	-0.0151065	-0.00627691
Dennd6b	929	0.123354	0.214616	0.0102667	0.00795125	-0.0011494	0.0177776
Slc7a5	930	0.00707914	0.0162469	-0.00268897	0.0278008	0.0947909	0.026579
Igf1	931	0.00447488	0.0107452	-0.0130561	-0.263291	0.0264838	-0.0474723
Sun1	932	4.35471e-06	1.54919e-05	0.0808262	0.150457	0.061151	-0.0120114
Bmp1	932	0.0044751	0.0107452	-0.0953621	-0.936632	0.0853897	-0.054856
Cybrd1	932	0.0703114	0.129408	-0.000492761	0.0283088	0.0389417	0.0284262
Zfp282	933	0.00123666	0.00322487	0.0562603	0.0560751	0.005645	0.00561542
Acsl1	933	0.00299757	0.00736008	0.0612566	0.0587206	-0.0359511	0.0448809
Ppp2r3a	934	4.47046e-06	1.5891e-05	0.0614653	0.138551	-0.0529708	-0.0829805
Depdc7	935	4.55874e-06	1.61532e-05	0.0305605	0.0558009	-0.0072116	0.00533043
Jmjd6	935	0.00469828	0.0112446	-0.119143	-0.0946711	0.13526	-0.0791912
AC168977.1	935	0.127084	0.219903	-0.00317172	-0.00552873	-0.002759	0.0124854
Upf1	936	4.66287e-06	1.6496e-05	0.0653624	0.124213	0.0640473	0.0323794
Serpina3g	937	0.00498368	0.0118512	-0.0150502	-0.074951	0.0384224	-0.0507446
Ogfrl1	938	4.74717e-06	1.67676e-05	-0.0226592	0.143232	-0.107449	0.0431229
Slc1a5	938	0.00499075	0.0118617	-0.195827	-0.108545	0.115358	-0.0346182
Eid2b	938	0.013363	0.0290477	0.011031	0.010806	0.0277375	0.0193208
Ipo13	939	0.128875	0.222657	-0.00688126	-0.0266435	0.00686663	0.0274938
Cenpc1	940	0.00504129	0.011969	-0.10202	-0.0413737	0.0695171	-0.0365153
Rfx1	940	0.12937	0.223425	0.0155532	-0.0176357	0.0138487	0.0310901
Mmp16	941	0.00508634	0.0120631	-0.410555	0.0276802	0.0581696	0.0134224
Epb41l2	941	0.129553	0.223569	-0.360255	-0.551765	0.0451724	0.0532649
Hsbp1l1	942	0.00167088	0.004282	0.0232631	0.00569026	-0.0477895	0.0118292
Tmem259	942	0.129791	0.223891	0.0226365	-0.085925	-0.0229252	0.0485541
Snai3	943	0.000215573	0.000626327	0.0196828	0.0229096	-0.00519193	-0.0206728
Nfia	943	0.130082	0.224307	-0.180166	0.0141882	0.0439425	0.0729876
Tfcp2l1	944	5.67795e-06	1.99131e-05	0.0233633	0.0397437	-0.145162	0.00892268
Vps50	944	3.1125e-05	0.000100661	0.0833819	0.15102	-0.0418305	0.0631274
Stx3	945	5.73693e-06	2.00883e-05	0.0355408	0.230577	-0.317445	-0.283601
Pdzk1ip1	945	2.01554e-05	6.63016e-05	0.0248477	0.0616724	-0.318987	0.0262585
Slco1a5	945	0.00132447	0.00344579	0.0271213	0.0318971	-0.135159	0.0153247
Tmem30b	946	0.0014337	0.00370616	0.0245037	0.0280532	-0.0379296	-0.0105302
Atp13a2	947	5.90077e-06	2.06134e-05	0.0523947	0.0830862	-0.0522546	-0.0579152
Msx1	947	0.00570379	0.0133808	-0.376915	-0.600878	0.0387242	-0.0449088
Nrd1	947	0.133837	0.230158	-0.0736847	-0.116918	-0.0346608	0.0750934
Map3k5	948	5.91418e-06	2.0644e-05	0.0442729	0.0613274	-0.038796	-0.0414102
Serpinb6b	948	8.53399e-06	2.93064e-05	0.0377968	0.0743445	0.0427304	0.0117337
Duoxa1	948	0.00179307	0.00457146	0.062935	-0.098643	-0.0435371	-0.00233712
Coro1c	948	0.135581	0.232708	-0.0408395	-0.00167246	0.0537761	0.0631934
Arid4a	949	6.15366e-06	2.14631e-05	0.0377007	0.232065	0.0270499	-0.204911
Ttc36	949	0.0923304	0.165422	0.00104514	0.00482785	-0.0852852	0.00569093
Car9	950	0.00015609	0.000460737	0.0307511	0.0386524	0.0109723	0.0123895
2700038G22Rik	950	0.00230582	0.00577948	0.0575447	0.0798939	0.0205235	0.0387223
Prr13	951	0.00188854	0.00479839	0.127991	-0.411571	-0.362526	-0.00642425
Chst2	951	0.005941	0.0138904	-0.0929962	-0.0662173	0.0567177	0.00593514
Eaf2	951	0.00717648	0.0164424	0.00296393	0.0258155	0.00580455	0.0164281
Cog3	952	0.00192945	0.00489674	0.0343516	-0.00837992	0.00574841	-0.012607
Cnn1	952	0.0060534	0.0141235	0.0143159	0.0287124	0.0533868	-0.307726
Rin3	952	0.045528	0.0878206	0.0277881	0.0283995	0.0233622	0.0266034
Echdc3	953	6.72921e-06	2.33973e-05	-0.0160467	0.0606797	-0.189817	-0.00750839
Fcgbp	953	0.0749835	0.137213	0.0265123	0.0285873	-0.267226	0.028876
Tnfrsf11a	954	7.07019e-06	2.45445e-05	0.0275421	0.0305665	-0.022614	0.0195775
Btn1a1	954	0.00196176	0.00497025	0.0265276	0.0469569	-0.211191	0.0257355
Mmp2	955	0.00626125	0.0145703	-0.580289	-1.98583	0.0479679	-0.152263
Spry1	956	0.00638199	0.0147972	-0.231678	-0.219037	0.0726978	-0.0767361
Hook2	957	7.20684e-06	2.498e-05	0.0527856	0.082276	-0.0121888	0.0170181
Rnf113a2	957	0.00213455	0.00538656	0.05154	0.00357079	-0.0391624	-0.00246949
Dennd2a	957	0.00647591	0.0149993	-0.293644	-0.445244	0.0364423	-0.029133
Cyp24a1	957	0.139369	0.238658	-0.000347676	0.011031	0.000559667	0.00508925
Tgif1	958	7.32651e-06	2.53383e-05	-0.0618221	0.316733	-0.582913	-0.238969
Mybl1	958	0.00092165	0.00244202	0.0313628	0.0425104	0.0338644	0.00989479
Cthrc1	959	0.00659442	0.0152421	-0.519979	-0.0993445	0.0383684	-0.0103213
Homer2	959	0.046684	0.0898188	-0.080639	0.0335705	-0.027066	0.0281194
Hdac11	960	7.72609e-06	2.66553e-05	0.0580838	0.093084	-0.0958337	0.0224858
AU041133	960	0.00191635	0.00486627	0.0147271	0.0304959	-0.0139596	0.0196947
Poc5	960	0.00218293	0.0054962	0.0458202	0.0251228	0.0336449	0.0314788
Cd302	960	0.0066019	0.0152436	-0.552437	-1.51153	0.0991239	-0.064528
Taf5l	961	0.000250323	0.000722579	0.0708555	0.106995	0.021789	0.0222134
Nat6	962	0.00229374	0.00575244	0.0420212	0.038238	-0.00554721	-0.0290289
Thap3	962	0.0409638	0.079988	-0.0850376	0.0841896	-0.0519105	0.0602437
Trpm4	963	0.000284062	0.000811554	-0.0253743	0.125168	0.0952489	-0.23896
Tex9	964	8.55927e-06	2.93706e-05	0.00906209	0.10538	0.0597277	0.0377023
Rtp4	964	0.0024626	0.00615167	0.100272	-0.292271	-0.379516	0.0267545
Bdnf	964	0.00676893	0.0155808	-0.304046	-0.199266	0.0631384	-0.0817553
Heatr5a	964	0.14758	0.251174	-0.0200459	-0.181954	0.0173129	0.0288701
Cdkn2aip	965	8.84409e-06	3.03245e-05	0.0892101	0.169427	0.0550612	-0.0219623
Procr	965	0.00681297	0.0156741	0.00118861	-0.303439	0.0272432	-0.0211911
Mxra8	965	0.14805	0.251676	-0.358249	-0.978023	-0.0329381	-0.0016513
Cln8	966	8.94547e-06	3.06486e-05	0.0504838	0.12406	0.0661581	-0.05205
Tmem106a	966	0.149063	0.253021	-0.00622292	-0.0239878	-0.0141719	0.0030038
Sectm1a	967	0.032039	0.064338	0.0123158	0.0129216	-0.034841	0.0109672
Lrg1	968	0.0884429	0.159324	0.00278785	0.0404311	-0.446543	0.0406498
Zcchc4	969	0.00264997	0.00657914	0.0303765	0.0181576	0.00472257	0.014458
Csad	969	0.00697208	0.0160236	-0.348964	-0.0229133	0.0825327	-0.0435241
Sp100	970	0.00269956	0.00668544	0.0277429	-0.13731	-0.110671	0.00559307
Nipal3	971	9.97416e-06	3.3964e-05	0.0118515	0.0337792	-0.00857116	0.0154983
Tpbg	971	0.00706895	0.0162378	-0.470996	-0.361751	0.110141	-0.355227
Atg7	971	0.021604	0.0450277	-0.0229096	0.0378417	0.00671784	0.0270206
Trp53i11	972	1.02639e-05	3.48718e-05	0.0606914	0.0904811	-0.0202045	-0.126989
Sytl1	973	1.02642e-05	3.48718e-05	0.0282893	0.0461626	-0.11239	-0.0365838
Eln	973	0.00722324	0.016524	-0.716005	-2.13748	0.056042	-0.0615623
Slc5a8	974	1.11618e-05	3.78057e-05	0.0341173	0.0516861	-0.263176	0.012516
Cndp2	975	0.00293935	0.00723308	0.0804966	-0.794334	0.0328574	0.0490311
Cbr3	975	0.00733148	0.0167544	-0.00335078	-0.0842436	0.0936073	-0.0999676
Khsrp	975	0.0124327	0.0272517	0.0630841	0.0625485	0.0592296	0.0483899
Antxr1	976	0.00735964	0.0168016	-0.25628	-0.476209	0.0678322	-0.0379462
Rnf125	976	0.156767	0.264887	-0.0592607	-0.198703	-0.0631762	0.0240391
Rtl8b	977	0.00749664	0.0170781	-0.019174	-0.183196	0.0562613	0.0298647
Col6a2	978	0.158638	0.267845	-0.919124	-3.0986	-0.0126773	0.0472456
Cd200	979	1.27047e-05	4.27393e-05	-0.101375	0.134109	-0.050615	-0.0983073
Amd2	980	1.39175e-05	4.67132e-05	0.0359407	0.074521	0.0391282	0.016254
Alox12	980	0.000174327	0.000512509	0.0293588	0.0354556	-0.00263689	0.0119752
Matn2	980	0.00757106	0.0172312	-0.249685	-0.299403	0.0735782	-0.113795
Scaf1	980	0.0365053	0.072104	0.032135	0.0363121	0.0593545	0.0242483
Rnf152	981	0.0799706	0.145561	-0.0187925	-0.00392818	0.00590772	0.00783871
Slc7a6os	982	0.00762693	0.0173407	0.0304125	-0.00841248	0.064229	-0.0633627
Ap5z1	983	1.49163e-05	4.99154e-05	-0.0986224	0.0618494	0.00746788	0.000981311
Mettl27	983	0.000561263	0.00152991	0.0372772	0.0932437	-0.0802799	0.023313
Mllt3	983	0.00354515	0.00862375	0.06912	0.077972	-0.0461015	0.0100861
Fubp1	983	0.00765106	0.0173866	-0.0903187	0.0517325	0.169258	0.0543553
Acap2	984	0.161979	0.273071	-0.114899	-0.135596	-0.138407	0.0475699
C530043A13Rik	985	1.63529e-05	5.45178e-05	0.028258	0.0443403	-0.0733097	0.00896504
Soga3	985	0.00798643	0.018121	-0.0805763	0.0212715	0.0217305	-0.00743109
Tmem189	986	0.00373454	0.00905972	0.0819572	-0.033647	0.00398055	0.0184305
Slc46a3	986	0.0183766	0.0389019	0.0104041	0.0203076	-0.0410171	0.014097
Fam53b	987	0.00478493	0.0114274	0.0535123	0.0481017	0.050967	0.0215824
Alkbh1	987	0.0079983	0.0181387	-0.174131	-0.151609	0.124391	-0.119164
Zfp329	988	1.7876e-05	5.9329e-05	-0.055507	0.0872336	0.00713843	0.0195882
1500011B03Rik	988	0.000633452	0.00171618	0.0180776	0.136717	0.0242187	0.0519521
Smim5	988	0.00276426	0.0068295	0.0236759	0.0267859	-0.0274361	0.00924714
Acsf2	989	0.164208	0.27641	-0.0200323	0.018006	-0.0707248	0.0319644
Bpgm	990	0.00838216	0.0189417	-1.21634	-0.271429	0.107728	-0.00749989
Sncg	991	0.00638022	0.0147972	0.0204024	-0.00391112	0.0730068	-0.177804
Dusp4	992	0.00338559	0.00824914	0.11172	0.163484	0.0777698	0.0826217
Crabp1	992	0.00861115	0.0194296	-0.373907	-0.611142	0.0659138	-0.00241973
Qsox2	992	0.166379	0.279854	-0.00464409	-0.03231	0.00846957	0.0229623
Rasl12	993	0.0836257	0.151595	0.00340545	-0.0655023	0.0120256	0.0108233
Ier5l	994	2.02273e-05	6.64887e-05	0.00305612	0.112864	0.0383545	-0.0565081
Tbcd	994	0.000128259	0.000383143	0.0398115	0.0778339	-0.000711899	0.0231257
Ddb2	994	0.000403425	0.00112233	0.0380843	0.0639015	0.0133277	0.0269726
Pdxk	995	2.03539e-05	6.68557e-05	-0.00786938	0.109958	0.0184601	-0.0564537
Tex10	995	7.00254e-05	0.000218872	0.079966	0.121183	0.0353477	0.0224266
Lfng	995	0.0043928	0.010576	-0.0802168	0.064333	0.0563332	-0.12888
Arhgef38	997	0.00276461	0.0068295	0.00960754	0.0113127	-0.0406909	0.0072757
Tmem119	998	0.00899404	0.0201819	-0.420206	-0.545827	0.0183608	-0.0502834
Pla2g16	998	0.170272	0.285432	-0.0612032	-0.428793	-0.377759	0.0716508
Zfp692	999	2.21133e-05	7.24212e-05	0.0480857	0.0646236	-0.00912365	0.0302071
2900093K20Rik	999	0.171361	0.28661	-0.0207692	-0.0150909	-0.00758583	0.0225178
Lcp1	1000	0.00491733	0.0117059	9.272e-05	0.0460152	-0.0400895	0.0230197
Gprc5a	1001	2.27333e-05	7.43423e-05	0.0583448	0.103275	-0.287663	-0.0637507
P3h1	1001	0.00938456	0.0210256	-0.170381	-0.601515	0.0581047	-0.0540406
Ninl	1002	2.36094e-05	7.70939e-05	-0.00351453	0.0343976	-0.0043668	-0.0193225
Nras	1002	0.00471967	0.0112897	0.134211	0.0687436	-0.229998	-0.0369123
Snai1	1002	0.00956247	0.0213919	-0.277673	-0.448568	0.03861	-0.146392
Elmo3	1004	2.65186e-05	8.64037e-05	0.0362202	0.05909	-0.0312291	-0.00912167
Stt3b	1004	0.0505318	0.0964303	0.0321453	-0.10296	0.0787075	0.0551168
Ppox	1005	2.69401e-05	8.77128e-05	0.0188398	0.0958185	-0.0277148	-0.0219264
Il1b	1005	0.0890869	0.160191	-0.0102085	0.0181908	0.0010431	0.0156631
Rnf167	1006	2.86535e-05	9.31552e-05	-0.059088	0.1416	-0.0686902	-0.0786738
Abhd18	1006	0.00504425	0.0119697	0.0276986	0.0339081	0.00511687	-0.00432581
9530059O14Rik	1006	0.0101238	0.0225458	-0.0206921	0.0177026	0.0425783	0.0275705
Usp40	1006	0.0164854	0.035335	0.03897	0.0595839	0.0254861	0.0222219
Nek7	1007	0.00509576	0.0120726	0.0842916	-0.0651934	-0.135722	0.00932953
Shroom1	1008	2.97373e-05	9.63973e-05	0.00312957	0.0300009	-0.0278363	0.000245549
Tchp	1008	0.000714823	0.00192609	-0.0210206	0.0556051	0.0341633	0.0302232
Snapc1	1008	0.0105448	0.0234013	0.0297858	0.0318196	0.0543689	0.00397898
Kcnk2	1009	3.06875e-05	9.9333e-05	-0.0228169	0.0572506	-0.033808	-0.0447039
Zfp775	1009	0.027977	0.0570694	0.00512478	0.0204042	0.00837055	0.0170708
Tradd	1010	0.000840681	0.00223686	0.0526219	0.06089	-0.0131086	0.0188865
Col16a1	1010	0.0109671	0.0242902	-0.21168	-0.432377	0.122422	-0.225572
Ccl11	1010	0.184014	0.304797	-0.0227654	-0.341931	0.00175801	0.007552
Ngf	1013	3.50812e-05	0.000113144	-0.22189	0.258117	-0.0967771	-1.27743
Ltbp4	1013	0.0112408	0.0248715	0.0103328	-0.357751	0.0469207	0.0113481
Hmga1b	1014	3.55766e-05	0.000114659	0.0456068	0.120094	0.0477581	-0.0518684
Rspo1	1014	0.188679	0.311186	-0.0181315	-0.199835	-0.00350584	-0.00355228
Anxa9	1015	0.00138741	0.00359067	0.0190493	0.0251991	-0.0293104	0.0155898
Insc	1015	0.0114721	0.0253582	-0.0470953	0.0150975	0.0274657	0.00555507
Endod1	1016	3.65608e-05	0.00011766	-0.694257	0.196073	-0.360695	-0.0314956
Prrx2	1016	0.0114891	0.0253707	-0.718944	-1.05678	0.0538849	-0.00539795
Esco1	1017	3.77828e-05	0.000121505	-0.0864195	0.133884	-0.00011651	-0.105705
Dnajb1	1017	0.0116021	0.0256074	0.0245259	-0.657285	0.151885	-0.500944
Myo18a	1018	3.85408e-05	0.000123764	0.0394285	0.107147	0.0461175	-0.0321455
Ell3	1018	9.89695e-05	0.000301718	0.0238833	0.0275203	0.00191704	-0.0107713
Nfil3	1018	0.0116371	0.0256718	-0.10599	-0.0854109	0.0767016	-0.212061
Shroom3	1019	3.90237e-05	0.000125225	0.048723	0.0980364	-0.0977625	-0.0214217
Dus4l	1019	0.0023606	0.00590681	0.0271025	0.0324347	0.0121433	0.0106812
Has2	1019	0.0116974	0.0257668	-0.16683	-0.135146	0.0345073	-0.0241348
Rnf123	1019	0.195889	0.321834	-0.000511372	-0.00125738	-0.00962487	0.0136444
Vangl2	1020	3.94634e-05	0.000126544	0.0189838	0.0853969	0.0143242	-0.00528842
Plekhg3	1020	0.00601765	0.0140475	0.0326606	-0.0360644	-0.0339155	0.00347667
Mettl21a	1020	0.0118111	0.0259915	0.00908624	-0.0500841	0.0352989	0.0107323
P2ry2	1020	0.196108	0.322074	-0.062739	-0.143064	0.000782581	0.0171105
Ltb	1021	4.09097e-05	0.000131088	0.0313977	0.0511228	0.00938809	0.0110316
H2-Q7	1021	0.00649144	0.0150197	0.101458	0.0832464	-0.348349	-0.0120206
Tcta	1021	0.170391	0.285523	0.0143021	-0.0472859	0.00475032	0.00632711
Synrg	1022	4.17027e-05	0.000133533	0.01149	0.073436	-0.0107759	-0.0112308
Dapk3	1022	0.000602161	0.00163538	0.0776843	0.139065	-0.025214	0.0480326
Ifi44	1022	0.00665936	0.0153683	0.0437306	-0.0117933	-0.167825	0.0206028
Wif1	1023	0.0067228	0.0154906	-0.0673746	0.0588083	0.0836165	-0.225597
Rubcn	1023	0.199747	0.327809	0.0113393	-0.000383981	-0.0169875	0.0242418
Colec12	1025	0.0124717	0.0273236	-0.604926	-1.22996	0.0281289	-0.00607678
Zfp518a	1025	0.101471	0.179773	0.0243238	-0.0033575	-0.0104705	0.0180132
Nlgn2	1026	0.0124779	0.0273238	-0.105002	-0.12941	0.0469445	-0.0384842
Ifnar1	1026	0.102063	0.180752	-0.0274903	-0.109379	0.000594908	0.0359352
Pdgfb	1027	4.52978e-05	0.000144628	-0.238876	0.0883026	-0.0261981	-0.123695
Fbxw7	1027	0.00634251	0.014721	0.0576793	0.0919938	0.0753099	0.00225758
Trim2	1027	0.204263	0.334343	-0.0209964	-0.0137895	-0.124834	0.0459235
Cldn23	1029	0.0013349	0.00346887	0.0222218	0.0323407	-0.113594	0.0167871
Fam118a	1029	0.0127427	0.0278762	0.0264957	-0.00342543	0.0398042	-0.0237383
Dcxr	1030	0.00724687	0.0165696	0.0476999	-0.0323657	-0.180934	-0.038856
Mtcl1	1030	0.012753	0.0278851	-0.0708729	-0.118915	0.0193215	-0.0705753
Notch3	1030	0.205246	0.335474	-0.077263	-0.55795	-0.122607	0.0283233
Abcb1b	1032	0.0130952	0.0285771	-0.0619754	0.00661679	0.0315058	0.00454857
Rab27b	1033	5.15037e-05	0.000163505	-0.00851003	0.0502903	-0.0892708	-0.043393
Adam23	1033	0.0131706	0.0287136	-0.0292165	-0.263997	0.0185686	0.0085304
Ttc9	1033	0.209855	0.342756	-0.00992444	-0.0899656	-0.0100783	-0.00040988
Wdr81	1034	0.210498	0.34368	0.000315632	0.00499694	-0.00723022	0.00675912
Hk2	1035	0.0132274	0.0288088	-0.0253045	-0.563503	0.0938114	-0.180202
2810454H06Rik	1036	5.39401e-05	0.000170874	0.0140656	0.0598889	-0.0213892	0.0268583
Trim68	1036	0.00759206	0.0172702	0.0212073	0.0226021	-0.0492821	-0.00435052
Pigr	1037	0.00475622	0.0113649	0.0285947	0.0464844	-0.234995	0.0238399
Ttc39c	1038	0.0135426	0.0293664	-0.00471968	-0.0498468	0.0306406	0.0134573
Rassf6	1038	0.212543	0.346384	0.00248256	0.00312893	-0.0258959	0.00623378
Tfeb	1039	5.64609e-05	0.000178479	-0.10695	0.0987025	-0.0635785	-0.0888405
Gm3550	1039	8.38911e-05	0.000258627	0.0421617	0.0567074	0.0237884	0.0322999
Car8	1039	0.000775867	0.00207925	0.0197945	0.0363399	-0.0232642	-0.00816051
Arhgef40	1039	0.0139594	0.0301968	-0.179426	-0.0776807	0.0631571	-0.057092
Phf20l1	1040	5.66022e-05	0.000178742	-0.185403	0.214575	0.0476706	-0.0186267
Ace	1040	0.213112	0.346677	-0.0581013	-0.140045	-0.0479108	0.00585748
2900026A02Rik	1041	0.00873858	0.0196872	0.0519363	0.0412457	-0.111663	-0.0378219
Klk10	1042	6.03857e-05	0.000190076	0.0511816	0.135499	-0.0256681	0.0337487
1110032A03Rik	1042	0.00889828	0.0199964	0.0509976	-0.0700332	-0.0331901	0.0113873
Kif1c	1042	0.0261276	0.0537765	0.0529168	0.00733563	-0.0787192	0.0412941
Isg20l2	1043	0.00737976	0.0168389	0.0234519	0.0747529	0.056872	0.0180887
Plekhg6	1044	6.19133e-05	0.00019461	0.000952752	0.0311699	-0.0713729	-0.0561727
Adgrg1	1045	6.31191e-05	0.00019812	0.0252895	0.0648726	-0.0336052	-0.0690696
Fth1	1045	0.000203363	0.000593563	-0.330278	0.344829	0.294558	-0.526989
Sgms2	1045	0.00924018	0.0207125	0.0647419	-0.0549928	-0.178154	-0.0986743
Kbtbd3	1046	6.4102e-05	0.000200927	-0.0865142	0.0624881	-0.0130694	0.0105621
Scrg1	1046	0.00180072	0.00458571	-0.0885017	0.0612208	0.0511805	-0.0354198
Entpd6	1046	0.0375756	0.0738904	0.028212	0.0366969	0.0281536	0.0291816
AB124611	1047	6.41034e-05	0.000200927	-0.0602196	0.0581273	0.00837962	-0.0236298
Tmprss2	1047	0.00697166	0.0160236	0.0193102	0.03044	-0.18526	0.0173539
Pgpep1	1047	0.00960649	0.0214796	0.0237356	-0.0264012	-0.0405217	-0.00744046
Gm20275	1048	0.00198512	0.00501515	0.00281275	0.0221997	-0.0246701	0.00567221
Cfb	1048	0.219426	0.35552	-0.0190441	-0.0717512	-0.00825849	0.00256696
Hs3st3b1	1049	0.00619954	0.0144343	-0.0431946	0.0282074	0.0186005	0.00698419
Dennd6a	1049	0.220391	0.356305	-0.0460455	-0.0561069	-0.0356535	0.0157231
A130010J15Rik	1050	0.000528585	0.00144525	0.0448527	0.059304	-0.00102614	-0.00757858
Akap12	1050	0.0163835	0.0351503	-0.633146	-0.39958	0.0589966	-0.0961503
Gm21887	1050	0.0366241	0.0722746	0.0769143	0.0218689	0.0691774	0.0399729
Mycbp2	1052	0.0164507	0.0352776	-0.0250368	0.0846396	0.0950788	-0.0944009
Pcnx3	1052	0.226612	0.364773	0.00938962	0.0151805	0.0151359	0.0329145
Ankrd33b	1053	7.3188e-05	0.000228117	-0.00649303	0.029834	-0.0312884	0.00830619
Prpf38b	1053	0.00825012	0.0186718	0.064306	0.174482	0.135171	0.0661499
Nr4a1	1054	7.49686e-05	0.00023334	-0.376177	0.400628	0.0732318	-0.390066
G0s2	1054	0.00259178	0.00644545	0.00264361	0.107629	-0.0385166	0.0520216
Slc7a11	1054	0.00590032	0.0138098	-0.0678274	0.00302146	0.0226316	0.00560062
Lsmem1	1055	0.0107062	0.023724	0.0133699	-0.0200073	-0.0143183	0.00785018
Serpine1	1055	0.0167245	0.035813	-0.49415	-2.20004	0.0785909	-0.386151
Hist2h3c2	1055	0.0243729	0.0504446	0.0174281	0.026062	0.0196831	0.0132108
Spsb3	1056	0.00552206	0.0129927	0.073425	0.0946474	0.058587	0.0191705
Actn1	1057	0.0111711	0.0247296	0.10988	-0.161734	-0.0931354	0.0586893
Sept10	1057	0.0168468	0.0360402	-0.0448419	-0.0370135	0.052275	0.0126986
[truncated: 2,455 more rows]

## Sheet: 2- Hybrid Basal EMT
	Top	p.value	FDR	logFC.1	logFC.3	logFC.4	logFC.5
Vim	1	3.00635e-194	1.33903e-190	1.54391	-0.518685	3.44022	1.75476
Pcolce	1	7.15243e-172	1.0619e-168	2.48506	-0.177985	2.96575	2.46196
Bgn	1	5.44464e-171	6.0626e-168	2.46715	-1.71685	2.88632	2.22856
Icam1	1	9.77235e-130	3.34816e-127	2.06978	3.24357	2.67328	0.938807
Sparc	2	1.27225e-182	2.8333e-179	2.47796	-1.89696	3.16182	1.55224
Sept7	2	1.02659e-161	7.6207e-159	1.45229	2.42795	2.52983	1.90793
Cd63	3	3.59792e-157	2.00314e-154	1.98199	-0.110787	1.79318	1.27918
Col3a1	3	1.11877e-114	2.93118e-112	2.48441	-1.48887	2.82369	2.57323
Dcun1d5	3	8.31265e-110	1.68293e-107	0.400463	2.16885	1.1949	0.970684
Col4a1	4	1.64793e-152	8.1554e-150	2.0648	-0.45722	2.81634	2.06438
Taf1d	4	3.81567e-108	7.38913e-106	-0.016075	2.25721	0.395634	-0.0620962
Ccnd2	5	8.47242e-162	7.54723e-159	1.72537	1.30796	2.78416	1.52817
Ptn	5	9.71392e-105	1.80274e-102	1.52158	3.21605	2.71908	1.6746
Errfi1	6	7.52348e-115	2.09435e-112	2.08311	1.4444	1.52348	1.24357
Jam3	6	3.87081e-112	8.62029e-110	1.59517	1.47973	1.89696	1.59302
Rp9	6	6.45116e-97	9.57782e-95	0.25868	1.80265	0.629859	0.417719
Serpinh1	7	1.95736e-158	1.24544e-155	1.42142	-0.673593	2.50867	1.26716
Timp2	7	2.91886e-113	6.84241e-111	1.70545	-0.490802	1.33527	1.38317
Col1a2	7	3.1018e-100	4.93407e-98	1.97358	-2.14987	2.24876	2.03052
Cwc15	7	3.75234e-90	5.06453e-88	-0.24029	1.78647	0.607837	0.665673
Cst3	8	1.66477e-110	3.5309e-108	3.38377	1.87011	3.45117	2.91851
Tmed1	8	1.60459e-102	2.74878e-100	0.961759	1.81387	1.69819	1.20681
Tuba1a	9	4.46135e-146	1.98709e-143	2.04574	0.371836	2.82039	1.59516
Fbln2	9	2.6345e-132	1.06673e-129	2.09706	1.41044	2.7354	1.91543
Yap1	9	2.9766e-82	3.31444e-80	0.838684	1.49738	1.07486	0.749739
Mfap2	10	4.67582e-91	6.50816e-89	1.47937	-0.316124	1.78476	1.51792
Cytl1	10	2.5166e-81	2.73388e-79	2.28583	3.18561	2.98156	2.46096
Col4a2	11	4.24076e-131	1.57403e-128	1.79474	-0.806789	2.55356	1.66888
Zfp266	11	1.53293e-78	1.55175e-76	0.400661	1.47016	0.692247	0.242149
Mgp	12	3.90216e-123	1.24145e-120	1.98899	0.462444	3.70568	2.17397
Fbn2	12	2.31577e-79	2.3987e-77	1.33903	0.96092	1.56321	1.39502
Eif3g	12	7.29798e-75	6.916e-73	-0.538455	1.72225	0.190631	0.0158311
Emp3	13	6.83659e-119	2.03001e-116	1.28939	-0.423145	1.84429	0.913202
Malat1	13	2.43544e-100	4.01757e-98	1.92117	-0.653584	0.10246	0.30502
Ly6k	13	1.72211e-74	1.59797e-72	0.4702	1.46298	0.380887	0.195249
Sdc2	13	1.57199e-69	1.20718e-67	1.47712	1.22088	1.59219	1.56712
Apoe	14	2.60381e-86	3.13442e-84	1.85792	2.35748	2.35113	0.680397
Lgals1	15	2.77329e-113	6.84241e-111	0.545174	-1.19171	2.08725	0.920751
Serpinf1	15	2.46139e-88	3.13229e-86	1.60369	-1.52521	2.01852	1.59349
Igfbp3	15	1.39458e-79	1.47892e-77	1.69412	2.27006	2.30307	0.922751
Col5a2	16	5.29995e-86	6.2121e-84	1.48655	-1.2714	1.75687	1.4723
Laptm4a	17	1.35639e-85	1.54907e-83	1.3731	-0.536616	1.36167	1.27048
Sesn3	17	1.97038e-68	1.46268e-66	0.717422	1.50323	1.12416	0.501514
Selenom	18	2.54943e-104	4.54206e-102	1.23288	-0.305391	1.67825	1.02642
Mest	18	5.56248e-66	3.6978e-64	0.57826	1.87632	1.75718	0.985654
Amotl1	19	6.37744e-65	4.05787e-63	0.75305	1.48374	1.14899	0.571956
Mia	20	4.74348e-63	2.9757e-61	-0.115897	1.43804	0.326662	-0.563075
Elof1	21	6.57329e-63	3.95641e-61	-0.216745	1.33969	0.483713	0.573504
Aebp1	22	2.47133e-98	3.79562e-96	1.12888	-0.711691	1.49666	0.965852
Eva1b	22	4.7562e-90	6.23062e-88	1.31047	0.326315	1.57562	1.19473
Lgals7	22	1.46545e-60	8.26215e-59	-1.22726	1.78134	-0.770099	-1.53975
Cyth3	23	2.7435e-73	2.39599e-71	1.20354	0.68156	1.3634	1.19811
Nfib	23	7.53183e-59	3.8857e-57	0.350222	1.28452	0.392738	0.484738
Ppic	24	3.70966e-94	5.32995e-92	0.801388	-1.31389	1.4774	0.815718
S1pr2	24	2.85294e-73	2.44365e-71	1.13397	1.25288	1.22535	1.10023
Col1a1	24	4.3565e-59	2.28281e-57	1.36414	-2.80393	1.47054	1.43042
Emp1	25	2.33981e-74	2.12684e-72	1.48677	0.226465	1.29345	0.805298
Prrx1	25	9.48894e-71	7.68432e-69	1.05849	0.0220409	1.26311	1.08854
Fam180a	25	1.74271e-56	8.08544e-55	1.17433	1.38	1.26344	0.921458
Fstl1	26	3.4547e-61	1.97272e-59	0.914597	-1.56052	1.02671	0.961185
Ppan	26	2.72214e-56	1.24994e-54	0.258047	1.29546	1.00977	0.487309
Lrp1	27	5.12212e-74	4.56278e-72	1.12519	-0.621709	1.2251	0.973484
Chordc1	27	5.25455e-56	2.38814e-54	0.396631	1.13427	0.591571	0.313311
Ank	28	7.33161e-56	3.29848e-54	1.15122	1.0216	1.30395	1.24318
Aplp2	28	1.40755e-55	6.20713e-54	0.295948	1.46905	0.159584	-0.170676
Oaf	29	6.20577e-87	7.67792e-85	1.1567	0.322121	1.77352	0.903224
Angptl4	29	2.47298e-76	2.39449e-74	1.63747	1.31579	1.84411	0.934942
Herpud2	29	7.93021e-67	5.43402e-65	0.860575	1.13549	1.12815	0.865867
Marcks	30	1.52605e-59	8.18921e-58	0.914945	-0.380288	1.19975	1.11458
Pin1	30	4.75738e-53	1.90895e-51	-0.00594689	1.29683	0.932508	0.682824
Foxs1	31	4.92396e-58	2.46419e-56	1.17918	0.362504	1.3391	1.23747
Auts2	31	5.79477e-53	2.30445e-51	0.379963	1.21641	0.458372	-0.0242682
Hbegf	32	2.58039e-52	9.82312e-51	1.27387	1.91197	1.1415	0.829732
Sash1	33	6.32363e-70	4.94131e-68	1.12396	0.885939	1.01749	1.03343
Casp1	33	6.09952e-51	2.22682e-49	0.601377	1.11042	0.69469	0.660939
Dusp6	34	9.1931e-51	3.32895e-49	0.532702	1.3238	0.819615	0.0408632
Igfbp4	35	2.32853e-76	2.30472e-74	0.769943	-0.241005	1.65434	0.758445
Col9a3	35	2.60393e-50	9.20467e-49	-0.658315	1.02286	0.069318	-1.13645
Selenop	36	2.78148e-68	1.99818e-66	1.23574	-0.0479996	0.952313	0.964482
Slc1a3	36	1.30643e-54	5.48947e-53	0.871158	1.16178	1.17703	0.882995
Agt	36	1.66099e-54	6.91405e-53	1.20613	1.27747	1.27459	1.24223
Xist	37	1.03008e-67	7.28249e-66	1.75162	0.0309158	0.954139	1.14819
Ebf1	37	3.25027e-66	2.19344e-64	1.25281	-1.24103	1.44296	1.2392
Pmp22	38	2.5512e-68	1.8628e-66	1.02745	-0.224672	1.15473	0.911017
Col6a1	38	1.59982e-52	6.19616e-51	1.09857	-2.03752	1.16629	1.15997
Dnmt1	38	1.56108e-47	4.96648e-46	-0.195833	0.896038	0.472023	0.401497
Sox11	39	1.21111e-46	3.74602e-45	0.639277	1.04931	0.899697	0.656093
Nudt4	40	1.87209e-71	1.57326e-69	1.24717	1.37673	1.72337	1.3867
Aasdhppt	40	2.59277e-46	7.85591e-45	-0.176939	0.921374	0.422371	0.282211
Rcn3	41	5.31484e-71	4.38376e-69	0.689891	-1.60508	1.13695	0.4252
Col6a2	41	3.03017e-47	9.57189e-46	0.919124	-2.07002	0.976963	1.02466
Gria4	41	2.28185e-45	6.59957e-44	0.709225	0.85662	0.818123	0.713041
Crispld1	42	9.0469e-62	5.2331e-60	0.927231	0.841533	1.08919	0.924355
Igfbp5	42	4.67796e-45	1.34423e-43	0.741563	1.63657	0.428097	-1.03069
Col11a1	43	1.84507e-70	1.46749e-68	0.708071	-0.117701	1.33614	0.74971
1500015O10Rik	43	3.00465e-59	1.59318e-57	1.40059	1.64418	1.8415	1.5442
Arid5b	43	7.58993e-59	3.8857e-57	1.23568	0.367663	1.10078	0.773428
Hnrnpa1	43	3.08417e-49	1.03285e-47	0.0722234	1.31436	1.18316	0.648616
Thbs2	44	9.37768e-53	3.66388e-51	0.933391	-0.0480711	1.04042	0.94371
S100a4	45	1.73277e-68	1.30809e-66	1.08215	0.0242077	2.00227	1.28508
Cebpd	45	5.87105e-63	3.60066e-61	1.61051	1.25402	1.83171	1.47152
Endod1	45	2.2014e-41	5.60288e-40	0.694257	1.01302	0.417379	0.731513
Tsc22d4	46	2.79897e-41	7.08331e-40	0.513245	1.06291	0.538236	0.440183
Olfml3	47	6.61348e-62	3.87584e-60	1.3783	0.0392485	1.5896	1.26597
Prkcsh	47	2.84053e-41	7.14788e-40	0.296461	1.19077	0.721953	0.589304
Tnfrsf1a	48	5.02447e-67	3.49671e-65	1.02151	0.74067	1.26855	0.774565
Gadd45b	48	2.48931e-57	1.17951e-55	1.42369	0.225182	1.31528	0.811766
Nid1	48	7.24387e-52	2.68868e-50	0.730157	-0.775525	0.797992	0.706912
Acp5	48	3.55762e-41	8.90203e-40	-0.105197	1.02912	0.281264	-0.0805287
Colec12	49	4.10321e-46	1.23484e-44	0.604926	-0.512826	0.706828	0.660064
2010111I01Rik	49	5.38276e-41	1.33938e-39	0.462651	1.13961	0.879251	0.176663
Asap1	50	7.77257e-55	3.29705e-53	0.830095	0.363542	1.02696	0.899972
Bambi	50	1.55902e-40	3.79447e-39	0.336848	1.2076	1.00917	0.360016
Fscn1	51	5.85456e-66	3.83474e-64	0.674142	0.714584	1.25393	0.230191
Prrx2	51	1.39308e-48	4.59612e-47	0.718944	-0.231688	0.84296	0.771182
Trps1	51	1.81508e-40	4.39367e-39	0.256634	0.879214	-0.00902391	0.222289
Ifitm2	52	4.41454e-65	2.84962e-63	0.923116	-0.84812	1.30753	1.01763
Slc29a1	52	1.75853e-41	4.50143e-40	0.696592	-0.0781778	0.975518	0.968302
Dync2h1	52	2.4544e-40	5.84594e-39	0.446833	0.737579	0.517104	0.455594
Fcgrt	53	8.60285e-56	3.83171e-54	0.843088	-0.761904	0.817981	0.73192
Mpp6	53	3.61175e-39	8.12461e-38	-0.43295	0.78003	0.173914	0.0939513
Col14a1	54	1.67809e-49	5.66228e-48	1.118	1.222	1.3256	1.05728
Col6a3	54	5.4965e-44	1.53009e-42	0.885875	-2.24716	0.975366	0.928053
Klf9	55	2.36244e-55	1.02159e-53	1.18444	0.314895	1.01998	0.802587
Tm4sf1	55	8.06316e-41	1.99518e-39	1.14749	1.34794	0.560208	1.52819
Igfbp7	56	5.9014e-63	3.60066e-61	1.58291	-3.38284	2.02576	1.15618
Lmna	56	4.12183e-55	1.76525e-53	1.18651	0.689404	0.873149	0.216023
Irx1	56	5.0348e-37	1.04302e-35	0.0544323	0.752328	0.0438002	-0.0302221
Ugdh	57	6.90425e-63	4.1002e-61	0.96798	-0.38843	1.27392	0.485085
Gem	57	2.35108e-55	1.02159e-53	0.993089	-0.00754147	1.102	0.74141
Il11ra1	57	1.19372e-45	3.52108e-44	0.76521	-0.0975044	0.803785	0.790651
Foxp1	57	7.61502e-39	1.68743e-37	0.643114	1.02399	0.919462	0.561171
Plvap	58	6.54503e-43	1.76676e-41	0.753862	0.0421633	0.839661	0.80203
Maff	60	4.73936e-53	1.90895e-51	1.27576	0.729893	0.971393	0.931651
Bpgm	60	7.49216e-49	2.4903e-47	1.21634	1.15095	1.46221	1.32323
Id2	60	9.28332e-36	1.80559e-34	0.258747	1.19652	0.515159	0.0972059
Socs2	61	2.08335e-60	1.15991e-58	0.893793	0.461355	1.14937	0.799712
Ctsk	61	1.21932e-44	3.48131e-43	0.827434	-1.72007	0.960632	0.884487
Eif3e	61	1.92821e-35	3.70184e-34	0.269606	1.09679	0.851558	0.439464
Id3	62	8.3105e-60	4.56975e-58	1.46368	0.426333	1.7965	0.99146
Ahnak	62	8.13437e-53	3.20624e-51	1.02662	0.220381	0.763279	0.442286
Mxra7	62	1.6941e-39	3.84975e-38	0.623529	-0.224501	0.717323	0.714964
Fgfr1	63	1.42478e-59	7.73901e-58	0.941806	0.692307	1.16727	0.441454
Cxcl12	63	1.08171e-57	5.29445e-56	0.870777	0.781314	1.11639	0.914746
Eepd1	63	4.82453e-35	9.10528e-34	0.575707	0.704821	0.646473	0.578657
Cct5	64	4.93141e-35	9.26772e-34	-0.163148	1.07365	0.623574	0.378603
Litaf	65	2.20788e-52	8.47749e-51	0.969093	0.283575	0.868643	0.620991
Mmp14	66	1.96859e-58	9.96375e-57	0.917824	-0.897284	1.18737	0.964494
Rap1b	66	2.88026e-52	1.08718e-50	0.977864	0.271564	0.951274	0.710621
Sycp1	66	5.37178e-34	9.76568e-33	-0.337667	0.633143	0.178835	0.0397301
Gas6	67	3.12867e-52	1.17102e-50	0.967776	0.561704	0.787003	0.738201
Sox9	67	1.20626e-33	2.14908e-32	0.171477	0.87224	-0.104483	0.0740484
Lamb1	69	7.77013e-58	3.84535e-56	0.707995	-0.534455	1.001	0.666031
Birc3	69	2.6396e-32	4.45561e-31	0.656412	0.810169	0.539843	0.647365
Rora	70	1.14317e-50	4.1062e-49	0.812534	-0.230929	0.842585	0.723343
Col13a1	70	4.51517e-40	1.05291e-38	0.758562	0.588617	0.832128	0.780017
Timp3	71	5.53879e-50	1.92733e-48	1.13986	-0.897401	0.847415	0.880077
Sdc4	71	5.04393e-32	8.4776e-31	-0.330682	1.00517	-0.843275	-1.06378
Tuba1b	72	1.99063e-57	9.63725e-56	-0.494754	0.1706	1.21602	0.80402
Vgll4	72	1.46667e-37	3.08139e-36	0.723739	0.882372	0.858841	0.73231
Csrp2	73	2.09852e-57	1.00503e-55	0.69667	-0.0860013	1.2381	0.895431
Lama2	73	3.01876e-38	6.52696e-37	0.729729	-0.692615	0.8289	0.772986
Ddx50	74	2.60227e-57	1.22005e-55	0.827418	0.752819	1.05479	0.538448
Tcn2	74	1.40821e-49	4.78793e-48	0.931644	0.242959	0.394103	0.7418
Copz2	74	3.37768e-42	8.84953e-41	0.726476	-0.303157	0.70581	0.7209
Ccdc82	74	4.42748e-31	7.06809e-30	0.379814	0.683573	0.374354	0.333742
Med13l	75	1.20482e-30	1.88954e-29	0.612888	0.83454	0.685698	0.209649
Clmp	76	1.22915e-47	3.93859e-46	0.670984	0.20197	0.774742	0.653326
Itm2a	77	1.08e-47	3.48574e-46	0.742455	0.293613	0.978469	0.803477
Trib1	77	2.51549e-30	3.85017e-29	0.549325	0.97363	0.492844	0.168407
Aldh2	78	2.6319e-30	4.01455e-29	0.361538	0.917765	0.48809	0.107451
Zeb2	79	1.24856e-39	2.86654e-38	0.622391	-0.0991605	0.694841	0.631907
P3h3	80	2.39906e-53	9.89391e-52	0.673168	-0.568328	0.851296	0.634223
Ankrd28	80	1.94958e-46	5.94755e-45	0.768178	0.585204	0.812981	0.628691
Selenof	80	6.00585e-33	1.04086e-31	0.257563	-0.702863	0.801263	0.861102
Pdgfrl	81	2.43031e-53	9.93082e-52	0.743926	-0.212387	1.03008	0.721991
Sgce	81	9.12161e-38	1.93465e-36	0.504779	-0.134151	0.604791	0.553614
Zfp467	81	6.3933e-30	9.65281e-29	0.420628	0.582764	0.206066	0.287449
Twist1	82	1.98645e-51	7.3121e-50	0.559644	0.848992	1.01226	0.578243
Tcf4	82	1.92728e-48	6.31184e-47	0.631447	0.119017	0.880379	0.721118
Fbxl7	83	2.36556e-43	6.50384e-42	0.692205	0.349276	0.767994	0.658114
Tmem123	83	3.3673e-29	4.86947e-28	0.294036	0.890158	0.461986	0.387075
Metrnl	84	1.9199e-42	5.09001e-41	0.836165	-0.303839	0.891161	0.802589
Tmem51	84	2.53166e-36	5.07928e-35	0.78358	0.871771	0.828451	0.568752
Sphk1	85	1.64334e-45	4.78396e-44	0.778169	0.217438	0.79187	0.625725
Vps26b	85	3.84179e-28	5.37107e-27	0.133057	0.54818	0.454606	0.301944
Ankrd49	86	4.83605e-28	6.71021e-27	0.179969	0.559088	0.294033	0.275001
Rgs2	87	1.56346e-41	4.04864e-40	1.28722	1.29136	1.46505	1.29917
Ets1	87	1.37535e-30	2.14941e-29	0.665197	0.876168	0.819234	0.522246
Tmem59	88	1.82291e-44	5.13877e-43	0.824299	-0.335805	0.618772	0.497577
Pigyl	88	6.32303e-27	8.3569e-26	-0.171651	0.626954	-0.155187	0.218535
Wisp1	89	7.24406e-39	1.61325e-37	0.754306	-0.212414	0.856831	0.754245
4931406C07Rik	89	9.64723e-27	1.26008e-25	-0.26404	0.645301	0.179472	0.12632
Arl6ip5	90	2.20383e-48	7.16487e-47	0.89109	0.727417	1.05028	0.739118
Limch1	90	1.08781e-26	1.41257e-25	0.303327	0.528453	0.456506	0.342637
Lix1l	91	1.78177e-50	6.34881e-49	0.620198	0.371809	0.789467	0.597118
Zeb1	91	7.85511e-37	1.61975e-35	0.623774	0.280255	0.680223	0.585851
Myl9	92	2.74676e-50	9.63312e-49	0.621265	-0.0857577	0.917761	0.283075
Emilin1	92	5.1376e-38	1.09487e-36	0.575718	-0.015905	0.642921	0.568645
P4ha1	93	5.79082e-50	1.9994e-48	0.648719	0.0884388	0.864179	0.403351
Rhoc	93	6.85355e-44	1.89601e-42	0.925066	-0.268529	0.22371	0.565975
Etnk1	93	2.06052e-38	4.49881e-37	0.79573	0.788871	0.79933	0.633016
Tgfb1	94	7.58682e-50	2.59936e-48	0.83199	0.236501	1.0774	0.700274
Cpq	94	2.66996e-43	7.2957e-42	0.822249	0.48876	0.779834	0.729494
Ncald	95	9.41645e-31	1.48201e-29	0.634414	0.493847	0.535055	0.684165
Grasp	95	4.00153e-28	5.56962e-27	0.547314	0.687545	0.655275	0.242565
Bmp4	96	2.44942e-26	3.17143e-25	0.444842	0.512195	0.496666	0.431613
Rarg	97	3.78045e-25	4.61319e-24	0.225362	0.511339	0.330491	0.25604
Lama4	98	4.86206e-31	7.73415e-30	0.488799	-0.17852	0.634511	0.614669
Scarb1	98	4.63292e-25	5.63799e-24	0.150727	0.5486	0.302277	0.258809
Arc	99	6.10075e-25	7.32419e-24	0.239815	0.581545	0.335664	-0.288423
Dkk3	100	1.30566e-42	3.48229e-41	0.614208	0.37172	0.693662	0.571852
Peg3	100	6.30435e-25	7.54827e-24	0.237502	0.642949	0.478136	0.272499
Itih5	101	6.63103e-29	9.46622e-28	0.433027	-0.673059	0.388402	0.480421
Nab2	101	8.11745e-25	9.66714e-24	0.307793	0.548345	0.433851	0.252642
Rhoq	102	4.87365e-38	1.04362e-36	0.69831	0.253955	0.521893	0.670888
Ruvbl1	102	1.28351e-23	1.45835e-22	-0.135884	0.659127	0.550991	0.323615
St3gal4	103	1.44174e-23	1.62983e-22	0.344764	0.580184	0.384347	0.436096
Nfe2l2	104	3.0988e-47	9.71976e-46	0.832724	0.255825	0.989371	0.642367
Cald1	104	1.90822e-40	4.59417e-39	0.917939	-0.965574	0.784164	0.888741
Cdkn1b	104	1.50739e-23	1.69973e-22	0.242283	0.497955	0.455208	0.287201
Cd81	105	1.28221e-31	2.10737e-30	0.817105	-1.25715	0.438868	0.88919
Cdo1	105	2.40728e-27	3.21983e-26	0.531142	0.588655	0.505243	0.574119
Gnl3	106	4.26908e-47	1.32968e-45	0.327122	0.755366	1.10165	0.287999
Klf13	106	1.75583e-23	1.97487e-22	0.573388	0.758844	0.580559	0.124676
Gas1	107	1.55277e-46	4.76969e-45	0.596271	0.36766	1.04161	0.46178
Itga5	107	2.64869e-40	6.27515e-39	0.673902	-0.192242	0.728658	0.608957
Phgdh	107	4.74079e-23	5.2526e-22	-0.313994	0.589435	0.334262	0.319446
Aspn	108	2.67999e-29	3.91367e-28	0.823734	-0.580963	0.898521	0.860255
Cpne8	108	6.07662e-23	6.68278e-22	0.0984955	0.528038	0.429104	-0.0909556
Selenow	109	5.18464e-46	1.54983e-44	0.488529	-0.159366	1.09639	0.679929
Irx2	109	7.65244e-23	8.39507e-22	-0.005976	0.481852	0.0176141	-0.102002
Plod1	110	1.1146e-45	3.30963e-44	0.518837	0.138179	0.761672	0.493847
Hebp1	110	1.09424e-27	1.49044e-26	0.437049	0.387268	0.305885	0.594331
Nav2	110	7.91613e-23	8.66301e-22	0.158645	0.444541	0.10141	-0.0467055
Pdpn	111	1.52568e-45	4.47064e-44	0.41111	0.578399	0.918758	0.126568
Arl4a	111	1.188e-40	2.90733e-39	0.847443	0.641729	0.761907	0.601454
Gng11	111	6.3918e-36	1.25414e-34	0.633245	-1.59881	0.794231	0.696104
Acsl3	111	1.17591e-22	1.27744e-21	-0.0328301	0.67319	0.0254512	-0.345982
Dcn	112	2.71651e-42	7.15938e-41	1.41894	-1.1648	1.58837	1.27978
Mmp16	112	3.9498e-27	5.23583e-26	0.410555	0.47473	0.49343	0.443731
Tubb2a	113	1.94564e-40	4.65907e-39	0.995663	0.103778	1.05279	0.601974
Panx1	114	1.44471e-44	4.09856e-43	0.537687	0.709358	0.909494	0.589122
Nrp1	114	2.00435e-29	2.95609e-28	0.506589	-0.0514264	0.574642	0.539318
Cavin2	115	2.81564e-22	3.00021e-21	0.0879362	0.499905	0.311734	0.148178
Dpysl3	116	1.18136e-40	2.90706e-39	0.535696	0.332554	0.717785	0.574922
Ldlr	116	3.71618e-22	3.88541e-21	0.416497	0.77799	0.666474	0.323368
Phlda3	117	2.79028e-44	7.81629e-43	0.229156	0.108766	1.09961	-0.690556
Map2k3	117	3.1249e-40	7.32542e-39	0.935155	0.446513	0.725055	0.403444
Ttc28	117	2.38692e-30	3.66598e-29	0.425574	0.222573	0.454144	0.428217
Dock6	117	1.8276e-28	2.57599e-27	0.501927	0.537112	0.4987	0.440615
Blvrb	118	1.62151e-39	3.70369e-38	0.747556	0.571541	0.56883	0.696123
Cd302	119	2.98689e-40	7.03896e-39	0.552437	-0.877644	0.705277	0.529485
Azin1	119	4.95398e-40	1.14922e-38	0.773649	0.670877	0.846915	0.402632
Tmem176b	119	1.24637e-21	1.27617e-20	0.622056	1.02146	0.130851	0.180439
Thyn1	120	1.68257e-21	1.71491e-20	-0.60481	0.668358	0.525543	0.48414
Mdk	121	2.27667e-33	4.03996e-32	0.849046	0.0494984	0.934794	0.82823
Cdkn2d	121	1.81009e-32	3.08895e-31	0.0943082	0.711243	0.766314	0.0325899
Plat	122	2.74688e-43	7.46014e-42	0.86617	-0.720179	0.988283	0.63916
Chchd4	122	3.43472e-21	3.47687e-20	-0.0224978	0.575696	0.466745	0.308985
Gabarapl1	123	1.79949e-24	2.09815e-23	0.597165	0.701314	0.599486	0.358916
Casp4	124	1.15231e-38	2.54078e-37	0.875939	0.620105	0.886831	0.730528
Cdh11	124	1.31382e-36	2.68429e-35	0.550727	-0.325436	0.623182	0.525569
Epha7	124	2.39119e-29	3.50341e-28	0.354583	0.440381	0.469088	0.350519
Efemp2	125	9.49542e-43	2.54775e-41	0.628419	-0.715386	0.820077	0.604689
Eln	126	3.06934e-35	5.86731e-34	0.716005	-1.31737	0.837825	0.708966
Ldhb	126	8.44963e-21	8.39277e-20	-0.0287953	0.873267	0.293502	-0.0713764
Klf10	127	1.01842e-20	1.00355e-19	0.297276	0.628174	0.43462	-0.127633
Luzp1	128	2.27707e-38	4.94735e-37	0.78034	0.321221	0.903845	0.353957
Cxcl1	128	1.41716e-35	2.74436e-34	1.24574	-0.399997	1.10587	1.19511
Rassf4	128	1.10298e-20	1.08448e-19	0.149883	0.372087	-0.0247022	0.110177
Gnai2	129	5.61443e-42	1.46238e-40	0.402558	-0.242941	0.905188	0.570537
Slc50a1	129	4.90492e-39	1.09781e-37	0.507215	-0.104625	0.773467	0.632375
4930523C07Rik	129	1.18236e-20	1.15996e-19	0.0548414	0.748863	-0.142598	-0.538854
Atp1a1	130	1.47801e-20	1.44365e-19	0.0586383	0.803214	-0.563785	-0.537179
Cited2	131	5.16411e-20	4.92526e-19	0.352119	0.831821	0.632643	0.518501
Rhob	132	1.71107e-41	4.40525e-40	0.80194	0.150845	1.15927	0.399824
Hmox1	132	2.9944e-37	6.26153e-36	1.32365	-0.727998	1.2956	0.532993
Sgk1	132	5.44318e-20	5.18033e-19	0.452846	0.937601	0.404837	-0.0275651
Cebpb	133	7.91295e-37	1.62416e-35	0.962218	0.207993	0.966888	0.42063
Retreg1	133	6.32059e-20	6.00254e-19	0.045367	0.373314	-0.114245	-0.0971917
Tubb6	134	1.39548e-36	2.83812e-35	0.830171	-0.0817162	0.941631	0.606532
Acan	134	8.40393e-20	7.89685e-19	0.286195	0.347529	0.329241	0.29954
Vasn	135	1.47456e-36	2.98532e-35	0.72815	-0.436777	0.527274	0.548188
Itpr1	135	1.36301e-27	1.83965e-26	0.527869	0.567966	0.556167	0.541961
Gm26870	136	1.32108e-19	1.23615e-18	0.387864	0.503625	-0.151879	0.129798
Cox4i2	137	6.26427e-30	9.49016e-29	0.699338	-0.186458	0.726714	0.690965
mt-Nd3	137	1.46851e-19	1.36835e-18	-0.0396224	0.868328	0.11516	-0.0573336
Cavin3	138	5.48337e-40	1.26544e-38	0.292437	-0.35623	0.864422	0.490616
Akap13	138	3.79384e-33	6.62657e-32	0.577762	-0.371616	0.50377	0.542265
Mmp3	138	8.05661e-27	1.05542e-25	1.16845	1.21699	1.34637	1.2367
Fn1	140	2.91277e-36	5.8177e-35	1.04389	-1.53563	1.07063	0.942783
Col2a1	141	2.27847e-19	2.09676e-18	0.0745872	0.562381	0.246847	0.0422546
Fkbp9	142	2.04982e-39	4.63446e-38	0.436349	-0.406974	0.752152	0.49145
Gfpt2	142	4.33e-35	8.2418e-34	0.604184	-0.401248	0.630896	0.543812
Mtf2	142	2.94567e-19	2.69959e-18	-0.116392	0.452721	0.117771	0.0328473
Tspan7	143	3.18761e-19	2.91532e-18	0.126554	0.435959	0.218966	0.220213
Trim47	144	7.02758e-28	9.72076e-27	0.658317	0.377388	0.588965	0.658337
Ncor2	144	6.59184e-25	7.87133e-24	0.502513	0.561386	0.528965	0.473005
Mfge8	145	2.88389e-23	3.21121e-22	0.864054	-0.0357731	-0.321078	0.980223
Pde4b	146	4.21687e-19	3.80972e-18	0.550342	0.674376	0.383534	0.168295
Pdlim4	147	6.56108e-19	5.89174e-18	0.148512	0.663	0.405405	0.0740646
Syt11	148	6.55783e-26	8.36922e-25	0.41317	0.409728	0.457779	0.349796
Aard	149	8.72555e-21	8.63636e-20	0.260947	0.307349	0.309963	0.2675
Odc1	150	1.83384e-38	4.02361e-37	0.341022	0.760949	1.02664	-0.47927
Rrs1	150	1.36586e-18	1.20945e-17	-0.0023791	0.55728	0.462118	0.159556
Nop58	151	1.89492e-18	1.66141e-17	-0.283734	0.792438	0.56633	0.0407507
Fkbp7	152	3.23639e-38	6.96372e-37	0.507913	-0.651558	0.663595	0.487806
Cpxm1	152	1.74514e-31	2.83681e-30	0.446609	-0.0898222	0.508886	0.436709
Tgfb2	153	6.55599e-32	1.09365e-30	0.692452	0.265161	0.585452	0.628714
Chka	153	2.31489e-18	2.02167e-17	0.264123	0.651013	-0.0392281	0.0466015
Mafb	154	3.43264e-34	6.29176e-33	0.743391	0.194652	0.740543	0.554118
Camk1	154	1.17041e-33	2.10202e-32	0.65712	0.626693	0.540434	0.557804
Samd4	154	1.71549e-24	2.00546e-23	0.350982	0.0145661	0.389371	0.372959
Col12a1	155	3.0079e-34	5.53602e-33	0.603918	-0.724983	0.669268	0.495247
Fli1	155	2.42329e-27	3.23154e-26	0.372495	0.337242	0.417564	0.377423
Pdap1	155	3.08653e-18	2.67981e-17	-0.497698	0.748205	0.42168	0.492861
Cwf19l2	156	3.51394e-18	3.03904e-17	0.139417	0.440671	0.0475208	0.0859956
Emp2	157	1.19502e-33	2.1376e-32	0.722842	0.198725	0.41392	0.466541
Set	157	5.27573e-18	4.50155e-17	-0.715123	0.771246	0.473647	0.0331994
Meg3	158	1.04733e-37	2.21081e-36	0.796047	-0.496312	0.929202	0.692534
Epb41l2	158	1.54138e-22	1.65829e-21	0.360255	-0.128	0.447443	0.447627
Fam212a	159	1.41561e-27	1.89913e-26	0.309232	0.429323	0.502739	0.202899
Wnk1	160	4.80346e-37	9.99748e-36	0.586007	0.575686	0.797978	0.512515
Slc3a2	160	3.1793e-33	5.59707e-32	0.817129	0.280188	0.577731	0.327058
Adamts8	160	7.54786e-20	7.13762e-19	0.346847	0.367534	0.320273	0.350238
Loxl1	161	2.05093e-25	2.54452e-24	0.424035	-1.03677	0.481573	0.450266
Anp32b	161	1.04939e-17	8.73646e-17	-0.955231	0.769292	0.48586	0.0307402
Neat1	162	4.99773e-33	8.69526e-32	1.03824	-0.195616	0.587436	0.0322809
Npw	162	1.03804e-26	1.35188e-25	0.38079	0.264701	0.613619	0.542866
Anxa3	162	1.12308e-17	9.3325e-17	-0.389583	0.514004	-0.586525	-0.0333678
Pi15	163	5.14985e-25	6.21611e-24	0.397275	0.422054	0.465119	0.410822
Ppib	164	1.74256e-36	3.51193e-35	0.457919	-1.11859	0.92449	0.575186
Ramp2	164	1.19979e-25	1.50532e-24	0.274253	0.22464	0.402725	0.36214
Jmjd1c	165	9.63942e-33	1.66411e-31	0.67204	0.523924	0.679189	0.151993
Fbln5	165	3.84681e-28	5.37107e-27	0.453221	-0.352343	0.566408	0.493876
Lbhd2	165	3.90092e-22	4.05951e-21	0.324154	0.491941	0.530057	0.472037
Cxcl14	166	4.41681e-36	8.78235e-35	0.6796	-1.56711	0.972597	-0.0433811
Ecscr	166	2.03989e-17	1.67632e-16	0.421864	0.563027	0.257574	0.400397
Itgb1	167	4.68535e-36	9.27491e-35	0.595602	-0.468945	0.874401	0.469619
Tspan3	168	5.93848e-36	1.17035e-34	0.417409	0.0116317	0.787293	0.403787
Pdgfrb	168	1.58178e-32	2.72018e-31	0.604272	-1.29319	0.66947	0.550421
Mrc2	168	2.15541e-24	2.50005e-23	0.341483	-0.682797	0.373272	0.349888
Unc5b	169	1.04584e-29	1.55272e-28	0.461547	0.14395	0.448677	0.429038
Acadl	169	4.20266e-17	3.39106e-16	-0.475857	0.527276	-0.344309	-0.276699
Cd109	170	7.61688e-36	1.48796e-34	0.274379	-0.0676201	0.653894	0.0822826
Ptpn1	170	6.35103e-32	1.06344e-30	0.723499	0.406123	0.799619	0.272083
Trio	170	8.95738e-28	1.23136e-26	0.477935	0.505138	0.574724	0.420169
Fbln7	171	1.63312e-35	3.14887e-34	0.364313	0.256822	0.643298	0.403891
Cxxc5	171	6.77952e-29	9.64728e-28	0.516421	0.496209	0.621101	0.51884
Chd7	171	5.12834e-17	4.09348e-16	0.123519	0.343614	0.102266	-0.0187172
Wls	172	6.852e-32	1.13876e-30	0.644062	-0.65604	0.578955	0.501439
Il1r1	172	1.13848e-25	1.43243e-24	0.430844	-0.186842	0.431596	0.429044
Tpd52l1	172	6.03673e-17	4.79279e-16	0.0628622	0.32019	0.210529	0.210381
Mcl1	173	9.72431e-32	1.61012e-30	0.726769	0.4583	0.393544	0.404777
Tac1	173	6.15167e-26	7.87343e-25	0.766164	0.605256	0.856662	0.76875
Sult5a1	174	2.12372e-19	1.9584e-18	0.278247	0.344031	0.343306	0.169872
Atp2b1	175	4.05593e-20	3.87664e-19	0.571041	0.701047	0.603916	0.581579
Pxdc1	176	4.49704e-35	8.52332e-34	0.481136	-0.270934	0.796037	-0.0701975
Epha2	176	1.28025e-16	1.00746e-15	0.0627073	0.309925	-0.103699	-0.158958
Hbp1	177	1.34887e-25	1.68761e-24	0.548163	0.573211	0.413412	0.347284
Slc6a6	178	1.26352e-34	2.36458e-33	0.640441	0.626704	0.790779	0.355077
Coq10b	178	8.51175e-18	7.15308e-17	0.504042	0.679472	0.0945727	0.0801128
Akap12	179	1.3265e-34	2.47207e-33	0.633146	0.34367	0.765054	0.597526
Emid1	179	3.02883e-33	5.35334e-32	0.270564	0.681751	0.851875	0.338903
Mxra8	179	1.9641e-20	1.91425e-19	0.358249	-0.586311	0.346305	0.373514
Lbh	180	1.33278e-34	2.47342e-33	0.579443	0.430285	0.744051	0.512817
Rrbp1	180	7.56216e-31	1.19439e-29	0.697034	-0.440651	0.793613	0.442933
Tnfrsf21	180	3.59629e-22	3.7778e-21	0.416812	0.0393238	0.401158	0.419964
Gsn	181	2.88224e-34	5.32676e-33	0.748766	-1.60768	0.922017	0.200557
Krtcap2	181	3.56674e-20	3.4164e-19	0.119799	-0.193389	0.5238	0.664772
Pdgfb	181	1.91474e-16	1.49356e-15	0.238876	0.347948	0.226364	0.127074
Kank2	182	1.046e-31	1.72551e-30	0.510068	0.459275	0.565494	0.382226
Mbp	182	2.34489e-16	1.81008e-15	-0.072188	0.358651	0.0691453	-0.125697
Fkbp10	183	5.20631e-34	9.50365e-33	0.346624	-0.466323	0.592862	0.432891
Hivep2	183	2.21895e-30	3.4198e-29	0.554416	0.136418	0.473923	0.335393
Fgl2	183	2.07972e-22	2.22136e-21	0.489246	0.291146	0.544049	0.506537
Tpi1	183	2.50885e-16	1.93329e-15	-0.644894	0.720826	0.364214	-0.0081901
Zfp326	184	3.30397e-16	2.54161e-15	0.0914528	0.502905	0.168864	-0.0595773
Sntb2	185	8.05357e-34	1.45815e-32	0.615866	-0.102316	0.736988	0.496002
Mmp2	185	8.47216e-34	1.52773e-32	0.580289	-1.32088	0.683611	0.474415
Fap	185	1.19437e-23	1.36055e-22	0.349765	-0.122354	0.399233	0.364011
Fkbp4	185	3.64866e-16	2.79229e-15	-0.59896	0.642137	0.53328	-0.0217189
Kri1	186	3.81316e-16	2.90819e-15	0.0599063	0.354531	0.161238	0.166378
Tnfrsf12a	188	1.05941e-29	1.56765e-28	0.868005	0.754265	0.362893	0.1482
Bicc1	188	7.17999e-21	7.15429e-20	0.248446	-0.296801	0.299191	0.287964
Wnt6	188	6.28257e-18	5.30978e-17	-0.023739	0.308837	0.300685	-0.236115
Prnp	189	1.55193e-31	2.53198e-30	0.576618	0.00996532	0.662825	0.207203
Cd248	189	3.09948e-22	3.27872e-21	0.362523	-0.748221	0.408237	0.382945
Col9a2	189	7.96684e-16	5.95374e-15	0.0982523	0.307976	0.103734	-0.14898
Hexa	190	2.26262e-29	3.32598e-28	0.519094	-1.14673	0.495745	0.416893
Tmem119	190	1.08637e-27	1.48426e-26	0.420206	-0.0564192	0.484375	0.407985
Snrpg	190	1.11893e-15	8.27861e-15	-0.816884	0.70471	0.495207	0.174165
Ybx3	191	3.45954e-24	3.9816e-23	0.0351677	0.194086	0.625838	0.586397
Rgcc	192	3.04842e-29	4.42269e-28	0.952761	-0.0667463	1.02196	0.836235
Acot1	192	1.33712e-15	9.86012e-15	-0.687224	0.349338	-0.474457	-0.247286
Jun	193	5.32615e-29	7.62787e-28	1.06278	0.780889	0.858639	0.325897
Cthrc1	193	4.29758e-22	4.46187e-21	0.519979	0.490857	0.607697	0.550871
Igfbp2	194	3.72458e-33	6.53121e-32	-0.232117	0.44301	1.21137	-0.642844
Zfp503	195	1.84334e-15	1.34815e-14	0.270352	0.387051	0.2516	0.136777
Fbn1	197	1.77844e-32	3.04661e-31	0.401678	-1.47574	0.562511	0.411948
Islr	197	1.20015e-21	1.23167e-20	0.283903	-0.361993	0.33294	0.310663
Id4	197	1.80818e-15	1.32679e-14	-0.0609424	0.513504	0.493401	-0.229779
Ptprk	198	2.63693e-15	1.90974e-14	0.325375	0.452434	0.215816	0.203696
Cachd1	199	1.16547e-27	1.58262e-26	0.375509	0.128561	0.449461	0.373601
Atad2	199	2.43952e-20	2.36724e-19	-0.0831691	0.405431	0.403571	0.254486
1500009L16Rik	200	2.57575e-32	4.37877e-31	0.27187	0.178099	0.481416	0.35629
Card19	200	8.28549e-28	1.14253e-26	0.573829	0.379431	0.377204	0.542289
Fabp5	200	2.75309e-15	1.9874e-14	-0.783575	0.937935	0.667102	-0.762941
Snhg18	201	2.64096e-32	4.45561e-31	0.352877	-0.142642	0.722516	0.331902
Aqp1	201	1.56803e-22	1.68289e-21	0.566276	0.401054	0.61473	0.569135
Cep295	201	3.30258e-15	2.37253e-14	-0.110039	0.364813	0.19133	0.124855
Fxyd1	202	7.46692e-20	7.0761e-19	0.289185	-1.11374	0.32969	0.313332
Epb41l4aos	202	4.37185e-15	3.10562e-14	0.0208195	0.453747	-0.182814	-0.0606297
Kdelr2	203	1.4927e-31	2.44429e-30	0.224521	-0.0799662	0.781396	0.316358
Pop5	203	4.38762e-15	3.11186e-14	-0.671413	0.464859	-0.19459	-0.288371
Foxc1	205	7.04257e-15	4.93978e-14	0.11156	0.354224	0.109223	0.0566409
Lamc1	206	1.97248e-31	3.19471e-30	0.35416	-0.183172	0.665421	0.352082
Axl	207	2.422e-31	3.90855e-30	0.353444	-0.345383	0.582188	0.257837
Gstm1	207	1.41028e-27	1.8977e-26	0.594887	0.230846	0.396948	0.413181
Etv1	207	3.90923e-18	3.36133e-17	0.315994	0.184009	0.245684	0.316932
Zfp36l2	207	1.25067e-14	8.67676e-14	0.278145	0.550304	0.482274	-0.0231311
Gpx7	208	2.98645e-31	4.80203e-30	0.115711	-0.861934	0.537265	0.287322
Chadl	208	1.42634e-14	9.8495e-14	-0.00634137	0.282969	0.0572869	-0.258873
Rwdd1	209	8.14935e-22	8.40214e-21	-0.0003312	0.270827	0.623068	0.587752
Cdc42ep3	209	1.50731e-14	1.03925e-13	-0.455154	0.543973	-0.272271	-0.528557
App	210	3.33196e-27	4.43002e-26	0.689279	-0.268965	0.502005	0.411228
Pxdn	210	2.30427e-25	2.843e-24	0.340249	-0.0453721	0.380626	0.308945
Matn4	210	1.6574e-14	1.14097e-13	0.151358	0.395903	0.245548	-0.177231
Medag	211	3.83074e-31	6.13744e-30	0.572964	0.461368	0.717018	0.348823
Enpp2	211	2.21735e-14	1.51473e-13	0.419914	0.450045	0.440896	0.37885
Tspan4	212	1.81153e-30	2.82117e-29	0.366021	-0.230478	0.607619	0.434455
Shisa8	212	2.33474e-14	1.59248e-13	0.0111233	0.275047	0.225559	0.104669
Txnrd1	213	7.34936e-31	1.16491e-29	0.67015	0.0532552	0.823924	0.63868
Ifrd1	213	6.59522e-27	8.69087e-26	0.797261	0.381498	0.0670733	0.517123
Col5a1	213	4.7031e-25	5.69229e-24	0.359561	-1.1249	0.418999	0.349632
Arid4b	213	4.51804e-18	3.86988e-17	0.490978	0.614602	0.444019	0.0425165
Penk	214	6.40893e-18	5.40632e-17	0.411916	0.303828	0.477465	0.466871
Jrkl	215	3.08251e-14	2.08655e-13	-0.0720411	0.237475	-0.0787047	-0.074251
Dusp5	216	1.97353e-23	2.20857e-22	0.588179	0.570092	0.100254	0.313359
Tgfbi	217	1.87431e-30	2.90877e-29	0.504492	0.512079	0.752914	0.379022
Ptger4	217	5.70423e-17	4.5369e-16	0.357527	0.397019	0.347252	0.27922
Calu	218	2.12976e-30	3.29373e-29	0.402312	-0.577569	0.716064	0.411392
Ncam1	218	3.27132e-20	3.14019e-19	0.341031	-0.353875	0.362527	0.335229
Bcas2	218	5.02455e-14	3.34519e-13	-0.658058	0.534024	-0.605647	-0.515265
Map4k4	219	3.52678e-30	5.36119e-29	0.444552	0.187481	0.690971	0.474097
Crym	219	5.12712e-14	3.40839e-13	0.224407	0.284973	0.245264	0.228865
Slc9a3r2	221	2.36047e-17	1.93264e-16	0.330923	-0.169205	0.299369	0.396873
Zfand5	221	5.65522e-14	3.73714e-13	0.369961	0.687227	0.190073	-0.0559181
Cdkn1c	222	7.37402e-30	1.10959e-28	0.298707	0.420947	0.665047	0.203001
Rai14	222	2.60086e-26	3.35775e-25	0.48392	0.29362	0.529847	0.414783
Nkd2	222	5.85951e-14	3.85499e-13	0.197171	0.473696	0.14571	0.342352
Ddx21	223	8.40009e-30	1.25663e-28	0.329264	0.39482	0.769798	0.463742
Cav2	223	6.9414e-14	4.55331e-13	-0.0640317	0.278349	0.134016	-0.00746209
Timp1	224	8.40763e-30	1.25663e-28	0.774277	-2.72948	1.04434	0.516698
Rassf1	224	7.28333e-26	9.2552e-25	0.606718	0.504882	0.574034	0.374404
S1pr3	224	2.44694e-25	3.01068e-24	0.402096	-0.970529	0.435557	0.367353
Ccdc71l	224	9.11656e-24	1.04116e-22	0.450781	0.427719	0.427279	0.413154
Lmo4	225	8.78842e-25	1.04383e-23	0.144014	0.657663	0.753813	0.509017
Tpbg	226	1.00656e-29	1.4994e-28	0.470996	0.201602	0.642622	0.167042
Serinc1	226	9.47943e-26	1.19947e-24	0.553696	0.00801872	0.625653	0.519202
Lamc3	227	1.02451e-17	8.54527e-17	0.301412	-0.256364	0.326967	0.316629
Sertad2	227	1.35729e-15	9.99231e-15	0.439774	0.549244	0.171367	0.149046
Smox	228	1.28658e-13	8.26904e-13	-0.111616	0.455075	-0.0322	-0.28282
Tmem176a	229	1.3916e-23	1.57715e-22	0.759656	0.772709	0.407745	0.424678
Ckap4	230	2.8565e-29	4.1578e-28	0.364105	-0.346106	0.625674	0.370276
Phf20l1	230	1.91623e-13	1.21753e-12	0.185403	0.453768	0.269132	0.195792
Mxd4	231	5.25866e-29	7.57995e-28	0.573779	0.0967954	0.709453	0.349241
Orai1	231	1.99156e-13	1.26359e-12	0.146108	0.438461	0.177462	0.134544
Reep3	232	5.30816e-29	7.62662e-28	0.497153	0.22246	0.733926	0.380835
Ctsl	232	1.87267e-25	2.33637e-24	0.769769	-0.537123	0.745702	-0.353872
Ddit4l	232	2.3508e-13	1.48307e-12	0.125151	0.272001	0.225031	0.135397
Sqstm1	233	2.06046e-25	2.54925e-24	0.716861	-0.465931	-0.201549	0.217807
Gjc3	233	2.41161e-13	1.51713e-12	0.159026	0.31125	0.276298	0.153491
Ext1	234	7.77559e-29	1.10294e-27	0.393775	-0.0443682	0.530628	0.350685
Rtn1	234	4.93759e-17	3.9483e-16	0.181281	0.22893	0.261533	0.21955
Col8a1	234	4.073e-17	3.2924e-16	0.413577	-1.50924	0.395508	0.448719
Lum	235	4.29325e-17	3.45789e-16	0.361088	-1.66109	0.389679	0.389896
Fth1	235	2.79693e-13	1.75211e-12	0.330278	0.61928	0.591156	-0.228648
Kazald1	236	9.55895e-29	1.35161e-27	0.374447	0.364204	0.532594	0.355108
Sox4	236	3.28959e-13	2.05208e-12	-0.236122	0.629009	-0.257342	-0.203814
Nrgn	237	1.77961e-17	1.46785e-16	0.337784	0.337659	0.41465	0.402688
Ckb	238	5.25808e-25	6.32959e-24	0.520674	-0.154335	0.521139	0.371246
Scx	239	4.93962e-13	3.0557e-12	0.221943	0.292662	0.215845	0.165382
Rgl3	240	5.28131e-13	3.25177e-12	0.171799	0.215943	0.170751	0.166004
Dlc1	241	2.8089e-28	3.94664e-27	0.425515	0.0234135	0.52612	0.32224
Myc	241	1.01695e-17	8.49809e-17	0.408545	0.540945	0.555467	0.188607
H1fx	242	1.84251e-15	1.34815e-14	-0.103236	0.290272	0.295938	0.18387
Btg1	243	9.68871e-25	1.1477e-23	0.751795	-0.128323	0.324036	0.415211
Ccdc80	243	6.3305e-21	6.33619e-20	0.436009	-1.41086	0.413524	0.402316
Brd8	243	7.18234e-13	4.40315e-12	-0.00656485	0.418126	0.127415	0.0442355
Slc35e4	244	1.15202e-24	1.35744e-23	0.544607	0.205314	0.337252	0.453732
Arpc1b	244	1.98894e-16	1.54603e-15	0.393238	0.415907	0.52526	0.679529
Tnfaip8	244	4.62476e-13	2.8689e-12	0.124857	0.400427	0.35601	0.0575941
Ngf	245	1.00421e-12	6.12706e-12	0.22189	0.516607	0.14977	-1.03059
Kdelr3	246	9.41989e-28	1.29096e-26	0.321378	-0.203203	0.542465	0.36535
Tmem120a	246	2.09912e-17	1.72182e-16	0.282135	0.421225	0.450753	0.241515
Lamb2	247	8.17341e-20	7.69649e-19	0.324165	-0.574522	0.214125	0.326336
Etv6	247	1.13993e-12	6.94562e-12	0.11171	0.327921	0.152303	0.0773707
Spsb2	248	1.1699e-12	7.10879e-12	0.233896	0.336831	0.109846	0.1274
Prkg2	249	1.20412e-27	1.63014e-26	0.140411	0.303425	0.807092	0.213227
Cdk2ap1	249	1.17167e-12	7.10985e-12	-0.257721	0.424028	0.278162	0.0310267
Ddr2	250	7.88017e-20	7.43608e-19	0.240712	-0.302557	0.294276	0.256146
Klc3	250	1.19927e-12	7.26741e-12	-0.295738	0.224194	-0.491409	-0.470896
Cpxm2	252	4.701e-25	5.69229e-24	0.38599	0.187449	0.427307	0.30677
Nr4a1	252	1.66191e-12	9.98939e-12	0.376177	0.814515	0.474151	0.00855661
Chn2	253	9.09203e-16	6.76059e-15	0.185276	0.273396	0.0887878	0.293986
Foxo3	253	2.89109e-14	1.96294e-13	0.33781	0.37719	0.34705	0.157215
Barx2	254	1.79533e-12	1.07623e-11	-0.282467	0.332311	-0.398432	0.155193
Spata7	255	1.8146e-12	1.08632e-11	-0.718006	0.591032	0.252107	0.0664837
Dab2	256	1.46682e-22	1.58573e-21	0.334931	0.0518214	0.39081	0.331497
Cdc42se1	256	1.98625e-12	1.18748e-11	-0.120568	0.471997	-0.269096	-0.163295
Plekhb1	257	1.99086e-12	1.18865e-11	-0.208503	0.300084	-0.0630344	-0.299335
Hspg2	258	7.08506e-27	9.30881e-26	0.266531	-0.370602	0.465108	0.247183
Il34	258	9.95511e-16	7.37772e-15	0.281052	-0.395702	0.289564	0.305955
Fbrsl1	258	2.17673e-12	1.29788e-11	0.093171	0.280988	0.0402721	0.127825
Pde4a	259	2.505e-20	2.415e-19	0.367582	0.245272	0.35774	0.354102
Rflna	259	2.55167e-12	1.51132e-11	0.12195	0.243734	0.211766	0.0690202
Bzw2	260	2.58235e-12	1.52746e-11	-0.57713	0.429268	-0.220756	-0.0467885
Klk8	261	3.17994e-12	1.86607e-11	-0.112605	0.354568	0.286465	-0.235386
Dag1	262	3.21059e-26	4.13294e-25	0.392455	0.363889	0.62648	0.419719
Jak1	262	4.87076e-23	5.38322e-22	0.568254	-0.430759	0.551445	0.260206
Srpx	262	1.61193e-17	1.33201e-16	0.254674	-0.59339	0.291919	0.270215
Cyr61	262	3.4454e-12	2.01918e-11	0.635552	0.869902	0.196556	0.38674
Map7d1	263	4.9839e-23	5.49463e-22	0.47267	-0.193947	0.408803	0.242989
Cd24a	263	4.05034e-12	2.36438e-11	-1.44916	0.527637	-1.33955	-1.24588
Bc1	264	4.28175e-26	5.49594e-25	0.399475	0.408316	0.555102	0.37991
P2rx4	264	2.67228e-13	1.67875e-12	0.354976	0.413754	0.159122	0.297637
Msx1	266	3.13671e-25	3.83816e-24	0.376915	-0.156409	0.459556	0.368509
Tax1bp1	266	5.17154e-12	3.00313e-11	0.0687287	0.568308	0.0072013	-0.147024
Itm2c	267	7.29362e-26	9.2552e-25	0.516701	-0.443629	0.757393	0.0227102
Sox6	267	6.02786e-12	3.47323e-11	0.117023	0.163603	0.134063	0.0959189
Rsrp1	268	1.6354e-22	1.75097e-21	0.592425	-0.322329	0.311283	0.228304
Casp12	268	2.458e-20	2.37999e-19	0.390393	0.345791	0.261535	0.305118
Pcdh7	269	1.02343e-25	1.29132e-24	0.300323	-0.0714294	0.38553	0.253721
Clu	269	8.16538e-12	4.66218e-11	0.0771148	0.394673	-1.11371	0.0468695
Abcg2	270	7.03007e-16	5.27137e-15	0.240702	0.14881	0.30443	0.293285
Gm266	270	8.17503e-12	4.66218e-11	-0.0325602	0.253253	0.118698	0.183263
Ikbip	271	1.93003e-25	2.40122e-24	0.356418	-0.264254	0.455372	0.335262
Sept4	271	5.48105e-17	4.36719e-16	0.310051	-0.317196	0.357876	0.327912
Cttnbp2	271	8.87976e-12	5.05114e-11	0.174557	0.249687	0.219872	0.139887
Cryab	272	2.97851e-22	3.15864e-21	0.716172	0.209685	0.44234	0.394701
Dpy19l1	272	3.10647e-22	3.27872e-21	0.146865	0.360968	0.443674	0.275575
mt-Nd4l	273	1.09154e-11	6.16969e-11	-0.0875044	0.567383	0.0150184	0.0788598
Aes	274	8.72124e-15	6.08847e-14	-0.0755583	0.251884	0.270293	0.545876
Cadm1	274	1.15632e-11	6.52757e-11	-0.426939	0.205676	-0.140633	-0.580886
Pltp	275	2.48232e-25	3.0458e-24	0.188913	0.309862	0.483843	-0.307707
Guca1a	275	1.20006e-11	6.75735e-11	-0.0948687	0.22291	-0.127309	-0.015101
Cyba	276	1.0179e-14	7.08393e-14	0.246408	-0.215736	-0.0719397	0.59788
Pnisr	276	5.44837e-12	3.15977e-11	0.388744	0.517572	0.286751	0.405435
Fam3c	277	1.19183e-14	8.28144e-14	0.284671	0.374651	0.204358	0.434024
Ap5z1	277	1.37841e-11	7.74202e-11	0.0986224	0.17199	0.113549	0.105806
Crip1	278	4.0152e-19	3.6349e-18	0.689221	-0.505348	0.568414	0.710309
Ptx3	279	1.26629e-24	1.48814e-23	0.52179	0.186915	0.604028	0.337174
Meox1	280	1.6514e-16	1.29041e-15	0.236855	0.171354	0.302779	0.280648
Nat8f1	280	5.83945e-12	3.3734e-11	0.213079	0.239171	0.233347	0.218828
Lima1	281	2.10004e-11	1.16483e-10	0.361918	0.469536	0.322004	0.363735
Loxl3	282	1.02633e-24	1.21254e-23	0.292303	-0.139425	0.434861	0.295999
Nav1	282	8.95791e-22	9.21444e-21	0.368327	-0.0996884	0.400437	0.321413
Creb5	282	2.38826e-11	1.32141e-10	0.299726	0.401818	0.00555144	0.0821224
Mfap4	283	1.40677e-16	1.10507e-15	0.372311	-0.169373	0.432921	0.397359
Nat8	283	2.5112e-11	1.38599e-10	0.129209	0.182661	0.171084	0.117229
C1qtnf6	284	1.38779e-24	1.62664e-23	0.31684	-1.14352	0.413192	0.278391
Atp2a2	284	1.20242e-22	1.30306e-21	0.541269	0.393509	0.617201	0.233923
Crabp1	284	2.50324e-20	2.415e-19	0.373907	-0.171577	0.485061	0.409067
Eva1a	284	3.04562e-11	1.67886e-10	-0.260996	0.219196	-0.0597725	-0.28196
Nfkbiz	285	1.38038e-21	1.41014e-20	0.492414	-0.0246637	0.445313	0.310658
Ogn	285	2.58167e-15	1.87276e-14	0.410407	0.349801	0.459158	0.437427
Rab7b	285	1.24118e-13	7.98874e-13	0.344788	0.398994	0.28846	0.380385
Arhgef12	286	1.80759e-24	2.10209e-23	0.45026	0.0870982	0.519867	0.260304
Sox10	286	3.68821e-11	2.0181e-10	-0.1684	0.285904	-0.0722575	-0.169853
Manf	287	2.211e-24	2.55787e-23	0.345259	-0.745197	0.741786	0.429652
Tfap2a	287	4.32078e-11	2.35266e-10	0.00361118	0.193745	0.0756963	0.021764
Adamts4	288	3.0045e-24	3.46685e-23	0.473342	-1.69821	0.540896	0.312132
1110008P14Rik	288	5.79999e-14	3.82147e-13	0.169084	0.236888	0.14994	0.43756
H2afy2	289	3.35757e-23	3.72933e-22	0.214621	0.174824	0.337788	0.264134
Rnd3	289	4.37691e-17	3.51891e-16	0.404352	0.415434	0.402521	0.312205
Dtna	290	8.13838e-11	4.38311e-10	0.138036	0.175885	0.158542	0.12786
Peak1	291	2.94752e-21	2.9905e-20	0.377261	0.00582187	0.328314	0.307319
a	291	2.39363e-14	1.63016e-13	0.234958	0.109088	0.26084	0.254036
Srpk2	291	9.83575e-11	5.25911e-10	0.276294	0.466587	0.213658	0.191796
Igsf10	292	5.03294e-24	5.77751e-23	0.346387	-0.0318189	0.416582	0.301854
Lmcd1	292	3.88446e-21	3.92321e-20	0.466163	0.404025	0.467461	0.412978
Anapc11	293	8.19437e-14	5.33593e-13	-0.246902	-0.233838	0.422704	0.474399
Amd1	293	1.07191e-10	5.69726e-10	0.0895136	0.421915	0.289723	0.0784869
Top1	294	6.19313e-21	6.21265e-20	0.650026	0.266829	0.763946	0.0702217
Gsto1	294	1.0863e-10	5.76685e-10	-0.0983025	0.539357	0.328918	-0.0976694
Serpine1	295	9.01639e-24	1.03237e-22	0.49415	-1.62211	0.628173	0.152764
Ivns1abp	295	1.13207e-10	5.9884e-10	0.146473	0.392324	0.245717	0.116901
Dennd2a	296	8.21503e-23	8.96808e-22	0.293644	-0.118043	0.353031	0.283574
Ctgf	297	1.42158e-20	1.39159e-19	0.693832	0.497893	0.522799	0.587523
Tfpi2	297	7.76791e-15	5.43998e-14	0.246571	-0.263749	0.29335	0.278707
Ano6	297	1.24918e-10	6.59223e-10	0.261746	0.336897	0.22675	0.273983
Kctd1	298	1.56697e-13	1.00277e-12	0.315557	0.407741	0.402417	0.099205
Trim35	299	1.9594e-23	2.19827e-22	0.271892	-0.154442	0.516044	0.185019
Itga8	299	1.89039e-14	1.29735e-13	0.241421	0.0370192	0.242654	0.257333
Hsp90b1	300	2.46848e-23	2.75555e-22	0.132708	-0.623388	0.740864	0.508609
St6galnac4	300	1.03914e-13	6.71026e-13	0.199239	0.0660753	0.320684	0.309326
Col9a1	301	1.70932e-10	8.94631e-10	-0.187641	0.285139	0.0535591	-0.0477074
Oaz2	303	4.33746e-14	2.90076e-13	0.339181	-0.404909	0.391856	0.382532
Efna1	303	1.87897e-10	9.78822e-10	-0.156395	0.26254	-0.260355	-0.352016
Mcm7	304	1.90109e-10	9.89189e-10	-0.560291	0.288228	0.176981	0.0905231
Slc44a2	305	2.3213e-10	1.20082e-09	0.221677	0.396807	0.295209	0.122995
Tigd2	306	2.33151e-10	1.2047e-09	0.157123	0.289867	0.148452	0.181823
Crtap	307	5.61793e-18	4.76614e-17	0.165758	-0.681868	0.3091	0.237539
Tnrc6c	307	2.70861e-10	1.39631e-09	0.200047	0.346312	0.245834	0.0692356
Pdia6	308	9.2615e-23	1.00858e-21	0.229032	-0.171006	0.734798	0.390797
Pdlim2	308	4.12479e-14	2.76684e-13	0.275327	-0.686603	0.137993	0.297977
Ninj1	309	2.48607e-19	2.28308e-18	0.406148	0.436588	0.545819	0.412617
Cped1	310	6.46037e-16	4.86055e-15	0.198906	-0.0989733	0.234179	0.213658
Mrpl51	310	2.77801e-10	1.42878e-09	-0.615998	0.450068	-0.0431184	-0.00735772
Prkca	311	1.38978e-17	1.15272e-16	0.396964	0.383039	0.419627	0.213273
Mef2c	313	1.50322e-22	1.62115e-21	0.364832	0.0726614	0.464375	0.300848
Plekhf1	313	1.24788e-19	1.17012e-18	0.444845	0.156109	0.371483	0.386037
Gata3	313	3.45068e-10	1.7585e-09	-0.0868736	0.193681	-0.165334	-0.176572
Etv4	314	1.05696e-18	9.37789e-18	0.0734125	0.0826546	0.311682	0.222997
Mdfi	314	3.56238e-10	1.81335e-09	-0.215732	0.329429	-0.260156	-0.507995
Ddit3	315	1.93785e-19	1.79442e-18	0.512796	0.243639	0.505474	0.304634
Ptprd	315	5.45343e-18	4.63541e-17	0.230286	0.0390941	0.265851	0.218077
Lmo1	315	1.1558e-12	7.03267e-12	0.0885517	0.231133	0.238292	-0.0603771
Csad	316	2.86244e-22	3.04279e-21	0.348964	0.3675	0.458194	0.327616
Bag3	316	1.99631e-19	1.84472e-18	0.472993	-0.3694	0.408688	0.062881
2810474O19Rik	316	4.67881e-10	2.35208e-09	0.0659208	0.494782	-0.0213553	0.0372286
Ap3s1	317	2.50723e-12	1.48698e-11	0.284702	-0.123737	0.328588	0.422506
Hmga2	317	4.72229e-10	2.37126e-09	0.14871	0.216714	0.135977	0.154448
Hpcal1	318	1.99529e-14	1.36513e-13	0.338673	0.0896608	0.323388	0.366372
Erc1	319	1.46707e-19	1.36835e-18	0.43847	0.381958	0.488443	0.2426
Dnajc3	319	5.95663e-15	4.18468e-14	0.40107	-0.0964918	0.31904	0.421083
Lcn2	319	4.86359e-10	2.43672e-09	-0.084006	0.669123	-1.40762	-0.407533
Tspan17	320	3.39593e-14	2.29174e-13	0.251044	-0.231993	0.161931	0.256897
Alox5ap	320	4.99085e-10	2.49487e-09	0.119246	0.236829	0.089934	-0.0904208
Prss23	321	3.51914e-22	3.7055e-21	0.368189	-0.636234	0.479021	0.31825
Sned1	321	7.33849e-22	7.58367e-21	0.315305	0.155152	0.367494	0.28141
Nfatc1	321	3.26133e-19	2.97663e-18	0.314789	-0.252594	0.342602	0.263519
Osbpl3	321	5.67612e-10	2.81681e-09	-0.00824526	0.176923	-0.313477	-0.0633385
Slc25a4	322	3.69882e-22	3.87636e-21	-0.356094	-0.234213	0.859576	0.161702
Map1lc3a	322	3.81175e-19	3.4648e-18	0.543441	-0.221099	0.449176	-0.020609
Vcan	323	3.86789e-22	4.03456e-21	-0.273584	-0.564325	0.528059	-0.238378
Ifngr1	324	1.22426e-16	9.65107e-16	0.351998	-0.165487	0.226581	0.303212
C2cd5	324	6.12704e-10	3.02884e-09	0.164508	0.229969	0.210668	0.16081
Hexb	325	5.14707e-19	4.6407e-18	0.462488	0.0312252	0.470689	0.221943
Srgap3	325	6.48745e-10	3.19483e-09	0.161222	0.204148	0.178068	0.107894
Kctd12	326	7.22219e-14	4.72359e-13	0.363615	0.351841	0.373943	0.335169
Smim3	327	5.68579e-22	5.88943e-21	0.407333	0.209347	0.473398	0.121448
Wwtr1	327	7.57009e-19	6.75695e-18	0.483994	0.00323254	0.369052	0.351187
Degs1	328	8.90904e-19	7.93617e-18	0.453779	-0.181924	0.432903	0.274211
Pkd2	328	1.01051e-18	8.98369e-18	0.277112	0.0808314	0.370019	0.298715
Bhlhe41	328	3.86629e-10	1.96356e-09	0.30269	0.365678	0.105889	0.145221
Plpp3	329	6.72445e-19	6.0263e-18	0.409751	-1.14949	0.456271	0.293331
Hacd1	329	2.25474e-12	1.3426e-11	0.149495	0.0477624	0.375944	0.340598
Snrpd1	329	9.45535e-10	4.60767e-09	-0.716492	0.524746	0.390318	0.191146
Maged2	330	7.14624e-21	7.13662e-20	0.390915	-0.409353	0.503799	0.362226
Bcl2l11	330	3.43018e-14	2.31135e-13	0.314923	0.328802	0.32337	0.178098
Osmr	331	1.57021e-18	1.38764e-17	0.377093	-0.325305	0.337657	0.105809
Smpdl3a	331	1.04233e-09	5.05174e-09	0.195807	0.344341	-0.0681639	0.113831
Marcksl1	332	1.6634e-19	1.5435e-18	0.690252	0.579484	0.861151	-0.0449849
Cxcl5	332	6.2574e-12	3.60083e-11	0.289008	0.232987	0.301021	0.343129
Ndrg2	332	1.14397e-09	5.52629e-09	0.223601	0.32973	0.304588	0.0157548
Bex4	333	1.14827e-09	5.54104e-09	-0.0298605	0.196283	0.121717	0.112416
Zmiz1	334	1.69289e-18	1.49309e-17	0.444593	0.358011	0.391687	0.339988
Cmtm5	334	3.89737e-11	2.12731e-10	0.145291	0.162049	0.173064	0.157474
Kcnk1	335	1.24708e-09	5.9919e-09	-0.614403	0.225725	-0.674012	-0.289327
Perp	336	1.38219e-09	6.59834e-09	-0.821364	0.335374	-0.651988	-1.15625
Cav1	337	1.84981e-21	1.88107e-20	0.186151	0.304045	0.498138	0.13545
Notch1	337	8.86504e-12	5.04922e-11	0.26239	0.0622361	0.292583	0.369842
Plpp2	337	1.40077e-09	6.67992e-09	-0.443538	0.307285	-0.543161	-0.129964
Grcc10	338	2.67855e-18	2.33013e-17	0.401525	0.205485	0.453622	0.334548
Abhd11	338	1.77689e-09	8.39265e-09	-0.347797	0.329377	-0.373901	-0.0108742
Ahr	339	1.79324e-09	8.46089e-09	0.04567	0.241463	-0.117066	-0.00657849
Baiap2	340	3.84697e-18	3.32062e-17	0.56882	0.445763	0.366484	0.0719607
Bdnf	341	5.43649e-21	5.47831e-20	0.304046	0.173097	0.413029	0.259954
Tspan11	341	4.0219e-12	2.35086e-11	0.153775	-0.129153	0.175732	0.167644
Dennd5b	342	6.13665e-21	6.16989e-20	0.304286	0.088662	0.386017	0.171565
Il6	342	5.04953e-16	3.81197e-15	0.421783	-0.957735	0.472417	0.407026
Dtx3	343	4.6176e-18	3.94756e-17	0.353326	-0.146583	0.248313	0.108978
F2r	343	1.49711e-17	1.23943e-16	0.281792	-1.29103	0.368856	0.294486
Tns1	344	2.33228e-16	1.80347e-15	0.248105	-0.192192	0.282519	0.23759
Fgfr2	344	2.20822e-09	1.0364e-08	-0.0699112	0.154133	0.0411263	-0.219941
Plec	345	8.4606e-21	8.39277e-20	0.433419	0.0146422	0.571004	0.0915255
Taf4b	345	4.3953e-10	2.21706e-09	0.117108	0.26214	0.239602	0.0486223
Tpm1	347	9.00428e-21	8.89248e-20	0.224923	0.460627	0.726644	0.384345
Dnajb9	347	5.96598e-18	5.0518e-17	0.49241	-0.017329	0.32826	-0.00709487
Serpinb8	349	4.04322e-09	1.85082e-08	0.0262314	0.1854	-0.0009181	0.0220692
Snai1	350	2.43604e-20	2.36724e-19	0.277673	-0.120481	0.3506	0.159557
Ubald2	350	1.07144e-09	5.18719e-09	0.225344	0.512488	0.385078	0.332846
Fxyd3	351	4.6751e-09	2.12262e-08	-1.6072	0.540319	-2.27235	-2.29638
Kctd11	352	8.72656e-18	7.3198e-17	0.368772	-0.174198	0.339865	0.288322
Rsbn1	352	4.69075e-09	2.12756e-08	0.0845302	0.341459	0.0324589	-0.0761151
Ceacam10	353	4.97223e-09	2.24607e-08	0.087553	0.263799	-0.0712129	0.0659085
Pianp	354	3.01081e-20	2.89636e-19	0.177158	-0.291027	0.396477	0.123667
Itgb3	354	3.82105e-11	2.08822e-10	0.178528	0.0606981	0.189109	0.194436
Ceacam1	354	5.00334e-09	2.25784e-08	-0.600698	0.209764	-1.50657	-0.671529
Tfap2c	355	5.15474e-09	2.32146e-08	-0.224216	0.173921	-0.0948113	-0.173854
CT025619.1	356	2.37651e-18	2.07143e-17	0.230091	0.178238	0.280035	0.219853
Snhg6	356	5.1617e-09	2.32224e-08	0.0645939	0.405101	0.227105	0.106941
Clic4	357	2.62357e-17	2.14018e-16	0.381655	-0.700262	0.311628	0.289802
Meox2	357	2.22049e-15	1.61602e-14	0.24253	0.194517	0.279638	0.239051
Sertad1	357	5.78217e-09	2.59354e-08	0.351273	0.507141	0.299078	-0.0885644
Eng	358	3.36933e-17	2.73351e-16	0.330147	-0.0372183	0.304307	0.225641
Jcad	358	1.98504e-15	1.44703e-14	0.213545	0.10294	0.214133	0.193308
Mfsd13a	358	5.85263e-09	2.6225e-08	-0.0398297	0.154444	0.0425036	-0.0379576
Vps37b	359	6.38157e-09	2.8509e-08	0.075885	0.30925	-0.227742	-0.155022
Por	360	4.69623e-17	3.76206e-16	0.450195	0.35672	0.467172	0.293038
Kcnq1ot1	360	1.66672e-11	9.30274e-11	0.459773	0.509515	0.471292	0.175954
Igsf9b	361	7.6012e-09	3.37209e-08	-0.00747661	0.115885	0.100194	0.0141192
Matn2	362	1.52717e-19	1.42005e-18	0.249685	0.00711623	0.363094	0.166448
Mepce	362	8.55785e-09	3.78795e-08	0.091343	0.22567	0.127829	0.00792605
Cbx3	363	8.59769e-09	3.79902e-08	-0.372191	0.353903	0.242229	0.0869387
Stk39	364	1.71699e-09	8.11833e-09	-0.025401	0.294539	0.234148	0.258025
Esco1	365	1.16465e-08	5.09064e-08	0.0864195	0.237637	0.0982129	-0.0092198
Man1a	366	3.82052e-19	3.4657e-18	0.298537	0.152224	0.316513	0.153436
Arl4c	366	1.17018e-08	5.10977e-08	-0.598126	0.233717	-0.360495	-0.946349
Cd44	367	7.07367e-17	5.59612e-16	0.537818	-0.140565	0.43051	0.325746
Mme	367	7.02421e-10	3.44937e-09	0.151554	0.163725	0.0969803	0.150473
Nfkb1	368	7.92498e-17	6.25848e-16	0.466375	-0.413295	0.304268	0.333222
Syt12	368	5.62552e-12	3.25404e-11	0.186522	0.185678	0.216865	0.202528
Stat5a	369	3.82331e-13	2.37836e-12	0.248337	0.0664618	0.194786	0.224958
Nedd4l	369	1.23828e-08	5.39656e-08	0.060629	0.170379	-0.167276	0.0298236
Dst	370	2.36692e-17	1.93436e-16	0.426703	0.275721	0.428002	0.0149967
Scarf2	370	3.4194e-16	2.62586e-15	0.229628	-0.0526419	0.282221	0.237832
Fam83g	370	1.28062e-08	5.57019e-08	-0.0518686	0.159046	-0.0466196	-0.310814
Rgs16	371	1.45291e-16	1.13931e-15	0.364666	-0.186873	0.363498	0.278371
Oxr1	371	1.30447e-08	5.66838e-08	0.155026	0.265376	0.108183	0.109465
Rdh5	373	6.46367e-12	3.71473e-11	0.190589	0.0971924	0.204511	0.197179
Trrap	373	1.34182e-08	5.82503e-08	0.199346	0.297713	0.187427	0.11265
Rassf8	374	3.75397e-19	3.41926e-18	0.239322	-0.0328532	0.322077	0.199252
Homer2	374	1.39307e-08	6.04163e-08	0.080639	0.133635	0.0652518	0.119367
Tcp11l2	375	2.24396e-16	1.74122e-15	0.324045	-0.000405208	0.234786	0.169263
Cbx5	375	1.24458e-09	5.98637e-09	-0.0645734	0.305128	0.284165	0.293255
Nenf	376	8.74316e-13	5.34184e-12	0.43737	-0.825212	0.44755	0.47231
Ss18l2	376	1.58633e-08	6.85972e-08	-0.331364	0.339177	0.0186113	0.0101412
Omd	377	6.42188e-11	3.47546e-10	0.195389	0.0523911	0.217146	0.209757
Eif1b	378	5.72369e-19	5.15016e-18	0.119546	-0.444155	0.403992	0.268713
Hsd11b1	378	2.88814e-10	1.48371e-09	0.197049	0.01751	0.182056	0.222163
Cacybp	378	1.66283e-08	7.16073e-08	-0.567661	0.44763	0.29683	-0.158498
Tst	379	1.66398e-08	7.16073e-08	-0.721341	0.29871	-0.332825	-0.105352
Ypel5	380	5.14699e-13	3.17957e-12	0.336434	0.337584	0.303489	-0.079079
Cacna2d1	381	4.69878e-16	3.5775e-15	0.218728	-0.361317	0.21976	0.166258
Runx2	381	1.89592e-15	1.38434e-14	0.211604	-0.0324721	0.263065	0.219408
Herpud1	382	6.93556e-19	6.20301e-18	0.307773	0.00322905	0.473579	0.257216
Capn2	382	4.76559e-16	3.616e-15	0.324742	-0.281687	0.219647	0.168076
Fam110a	382	1.88381e-08	8.07554e-08	0.0351705	0.261043	-0.10572	-0.0390978
Ugcg	383	1.92471e-16	1.49871e-15	0.273366	-0.0917651	0.343295	0.269628
Nrtn	383	1.88626e-08	8.07828e-08	-1.08541	0.275542	-0.749186	-0.899777
Anxa5	384	4.91615e-16	3.7239e-15	0.507829	-1.05013	0.533132	0.341825
Clip1	384	2.20113e-08	9.39966e-08	0.171372	0.35028	-0.155221	0.064747
Sec61b	385	2.53849e-15	1.84445e-14	-0.190454	-0.122852	0.580791	0.48834
Fosl2	385	3.85899e-15	2.76779e-14	0.452614	0.425689	0.471599	0.143865
Nectin3	386	4.46139e-17	3.58037e-16	0.212238	0.0385789	0.264345	0.203857
Slc4a4	386	2.27065e-08	9.67798e-08	0.081926	0.109014	0.0596572	0.105359
Tnfaip6	387	5.41662e-18	4.61293e-17	0.35237	-1.80226	0.414805	0.323106
Kif5c	387	1.15409e-08	5.04942e-08	0.110962	0.127573	0.0768971	0.0889114
Fas	388	1.74201e-18	1.53338e-17	0.33308	0.172757	0.397527	0.202175
Frmd6	388	7.07125e-16	5.29334e-15	0.308962	-0.190954	0.324798	0.264656
Antxr1	389	1.88242e-18	1.65371e-17	0.25628	-0.202273	0.335864	0.227499
Zbtb20	389	8.22389e-16	6.13554e-15	0.497529	-0.0245839	0.472257	0.255512
Mcm3	389	2.76623e-08	1.17229e-07	-0.458853	0.176683	0.154722	0.118047
Sobp	390	2.30345e-18	2.01563e-17	0.234081	0.046754	0.284714	0.183052
Cdkn1a	390	8.58793e-16	6.39643e-15	0.606216	-0.175844	0.437947	-0.0861068
Pttg1ip	391	9.7446e-16	7.23374e-15	0.398313	-0.291922	0.136769	0.194777
Capn6	391	8.96938e-14	5.82356e-13	0.113927	0.204811	0.243546	0.129148
Dclk1	393	1.19943e-15	8.85951e-15	0.335588	-0.117981	0.299239	0.216612
Plekhg2	393	4.30896e-15	3.07074e-14	0.22206	0.0438888	0.273163	0.224472
Tfeb	393	3.6087e-08	1.52208e-07	0.10695	0.189427	0.0333874	0.0087326
Cnn3	394	3.12097e-18	2.70443e-17	0.101133	0.0131767	0.605314	0.386741
Dpy30	394	3.75549e-08	1.57356e-07	-1.00194	0.327013	-0.182977	-0.20237
Pdgfra	395	3.90063e-18	3.36042e-17	0.228893	-0.0340173	0.291913	0.200771
Pdrg1	395	9.53796e-10	4.63778e-09	0.0437599	0.31894	0.27404	0.3398
Trib2	395	3.81192e-08	1.5957e-07	0.0993819	0.18292	0.131206	0.117072
Vkorc1	396	4.25844e-18	3.65454e-17	0.203604	-0.863446	0.489244	0.213235
Ltbp3	396	1.59211e-15	1.17017e-14	0.336922	-0.0620262	0.17833	-0.0127615
Git2	396	3.87589e-08	1.61944e-07	0.0856085	0.265276	0.113003	0.0397762
Hdac7	397	1.80397e-11	1.00436e-10	0.194544	0.0926428	0.137478	0.196586
Kbtbd3	397	4.08504e-08	1.70204e-07	0.0865142	0.14289	0.069353	0.093722
Spats2l	398	4.1467e-08	1.7245e-07	-0.736928	0.231804	-0.1474	-0.662376
Egflam	399	3.27812e-10	1.67248e-09	0.141052	-0.282629	0.163541	0.154139
Cnih2	400	1.43785e-11	8.05558e-11	0.0851893	0.160499	0.182802	0.169558
Fzd9	400	1.22986e-08	5.36514e-08	0.0973806	0.147509	0.149893	0.0256163
Tspan15	401	1.31408e-09	6.30023e-09	0.159907	-0.213324	0.212931	0.23189
Polr2j	401	4.72382e-08	1.9572e-07	-0.586405	0.377018	0.118474	0.0767144
Nrep	402	4.75971e-08	1.96841e-07	0.209068	0.30885	0.234326	0.228642
Cspg4	403	1.43757e-11	8.05558e-11	0.214185	-0.157087	0.239492	0.216848
Rhoj	404	7.91521e-18	6.66434e-17	0.239771	-0.784579	0.436891	0.31571
Ehd2	404	5.29371e-14	3.51389e-13	0.208933	-0.292544	0.27338	0.205361
Tgif1	404	5.3528e-08	2.20549e-07	0.0618221	0.418676	-0.493358	-0.154158
Cavin1	405	1.0148e-17	8.49608e-17	0.210242	-0.436041	0.359416	0.153472
Tmbim1	405	4.04608e-15	2.89265e-14	0.455597	-0.141579	0.124634	-0.0300352
Setbp1	405	8.10853e-10	3.96437e-09	0.138352	0.0482888	0.142978	0.145289
Il17b	405	5.40857e-08	2.22641e-07	-0.13159	0.268372	0.0491382	-0.32804
Ccdc174	406	2.25576e-13	1.42513e-12	0.2991	0.383207	0.419214	0.203672
Spint2	407	6.34871e-08	2.58711e-07	-1.38264	0.29592	-2.02335	-1.25491
Fkbp11	408	3.75931e-16	2.87204e-15	0.210908	0.0547187	0.542461	0.413958
Denr	408	6.82225e-08	2.77225e-07	-0.358982	0.401307	0.0777139	0.240925
Gch1	409	6.82794e-08	2.77225e-07	0.234972	0.355717	-0.0855479	0.12634
Apod	410	1.03316e-09	5.01276e-09	0.42381	-0.788285	-0.05288	0.444911
Pnrc1	410	3.15839e-08	1.33721e-07	0.41429	0.525075	0.237382	-0.145237
Pkdcc	411	1.29759e-09	6.22787e-09	0.131591	0.0211837	0.13962	0.14231
AB124611	411	7.99904e-08	3.22715e-07	0.0602196	0.129002	0.075442	0.0426609
Bach1	412	5.24106e-15	3.70534e-14	0.317423	-0.206723	0.303391	0.174427
Ifngr2	412	2.68852e-09	1.25258e-08	0.21596	-0.494726	0.114729	0.252736
Zfp329	412	8.5793e-08	3.45187e-07	0.055507	0.142693	0.062893	0.0748015
Cmtm3	413	4.68951e-15	3.32068e-14	0.241821	-0.255004	0.304765	0.24414
Thbs1	413	5.58979e-15	3.93939e-14	0.445557	-0.797562	-0.00300422	0.401919
Trim33	413	8.84132e-08	3.54768e-07	-0.0757256	0.22444	-0.145699	-0.0830241
Cgref1	414	1.70346e-10	8.92613e-10	0.210784	-0.101265	0.229075	0.222104
Tns2	415	4.52716e-14	3.02308e-13	0.222696	0.158593	0.253736	0.211897
BC005561	415	1.06131e-07	4.20933e-07	0.146027	0.385781	0.062685	0.0655563
Ywhah	416	1.81849e-17	1.49714e-16	0.238552	0.168534	0.551997	0.230781
Fam20c	416	3.61579e-09	1.66889e-08	0.179301	0.0224109	0.18543	0.202861
Ttyh1	416	1.17707e-07	4.64776e-07	0.0719615	0.126429	0.108889	0.119384
Tmem5	417	3.82115e-09	1.75639e-08	0.24282	-0.0552416	0.232132	0.301244
Paqr6	417	1.2231e-07	4.82096e-07	0.0829831	0.128121	-0.0221166	0.0641789
Opcml	418	1.38007e-07	5.42049e-07	0.179587	0.212464	0.215214	0.10901
Fmod	419	5.01554e-16	3.79274e-15	0.336403	0.0312316	0.387403	0.293403
Wnt5a	419	2.47753e-14	1.68472e-13	0.210452	0.0831959	0.226842	0.192381
Tro	419	1.79981e-13	1.14683e-12	0.163159	0.140268	0.180556	0.127964
H2afv	420	2.20067e-13	1.3923e-12	-0.597628	0.434046	0.49737	0.191249
S100a10	421	3.00276e-17	2.44502e-16	0.252161	0.058972	0.671914	-0.316557
Enpp1	421	4.25451e-14	2.84956e-13	0.29184	0.30538	0.460161	0.379101
Rnf167	421	1.74344e-07	6.7583e-07	0.059088	0.216635	-8.5346e-05	-0.0107533
Apbb2	422	3.02102e-17	2.4554e-16	0.307226	-0.22979	0.370695	0.257565
Myl12b	422	1.79745e-07	6.9616e-07	-0.170545	0.387516	-0.0627159	0.23356
Rcn1	423	3.42409e-17	2.77289e-16	0.0510923	-0.509494	0.536801	0.309929
Spag9	423	1.36361e-14	9.4456e-14	0.395849	0.0589934	0.145138	0.147175
Sod3	424	7.45133e-12	4.26584e-11	0.217383	0.070404	0.230554	0.210541
Nfia	425	5.5305e-09	2.48315e-08	0.180166	0.218279	0.24011	0.266098
Soga3	425	7.72012e-08	3.12028e-07	0.0805763	0.106911	0.105629	0.0759967
Usp2	426	2.91079e-09	1.35189e-08	0.153218	0.0387798	0.15379	0.172554
Wnt5b	426	1.96086e-07	7.55507e-07	0.00648942	0.126419	-0.301309	0.00757936
Spry1	427	6.99021e-17	5.53993e-16	0.231678	0.0729485	0.345222	0.187934
Crem	427	2.92845e-15	2.10716e-14	0.394345	-0.194754	0.451691	0.322589
Glrx	427	1.98411e-07	7.63804e-07	0.174356	0.264441	0.187207	0.224993
Pam	428	1.98479e-14	1.36004e-13	0.348553	0.118495	0.235279	0.252276
Ucma	428	2.05046e-07	7.86629e-07	0.0898742	0.138764	0.102254	0.0355759
Nt5dc3	429	2.07908e-13	1.31725e-12	0.209896	0.137319	0.250276	0.20606
Bcl2	429	2.23972e-07	8.57019e-07	-0.173535	0.184399	0.00141637	-0.0266333
Crlf1	431	1.58214e-16	1.23846e-15	0.114546	-1.54527	0.369554	0.0694409
Dnajc9	431	2.28259e-07	8.72673e-07	-0.706312	0.222514	0.0962673	0.0784355
Rbp1	432	3.70943e-14	2.49198e-13	-0.41207	0.601853	0.787304	-0.0955024
Twist2	432	9.99534e-14	6.47082e-13	0.163419	-0.0995378	0.193811	0.162054
Atp2b4	433	4.44976e-10	2.24199e-09	0.179855	-0.068121	0.147106	0.1791
Arhgef26	433	2.53368e-07	9.63708e-07	0.00758841	0.162126	0.050493	0.0275498
Rin2	434	2.86884e-07	1.08748e-06	0.0161287	0.247132	-0.141574	-0.0316652
Sema3b	435	1.68075e-07	6.54375e-07	-0.137882	0.18769	0.190875	0.0615681
Ythdc1	437	1.40638e-14	9.72676e-14	0.33226	0.381329	0.446654	0.258136
Gpx8	438	2.26225e-16	1.75236e-15	0.176969	-1.18723	0.419873	0.102372
Itpr2	438	3.45492e-14	2.32451e-13	0.288272	0.178061	0.181774	0.191827
Adgra2	438	1.06796e-11	6.05176e-11	0.164211	-0.0518418	0.182724	0.155907
Lfng	438	2.01699e-07	7.75123e-07	0.0802168	0.168705	0.152707	-0.0352957
Npm3	439	3.51711e-07	1.32308e-06	-1.18182	0.382408	-0.0845721	-0.261745
Adrb1	440	3.55439e-07	1.33597e-06	0.0797057	0.115746	0.0916738	0.0471814
Klf5	441	3.61015e-07	1.35464e-06	-0.400903	0.315254	-0.356707	-0.650241
Plxdc2	442	3.48173e-16	2.66913e-15	0.310894	-0.618669	0.377679	0.148006
Ssbp1	442	3.67209e-07	1.37557e-06	-0.527203	0.259346	-0.140423	0.112068
Rpl9-ps6	443	3.71722e-07	1.39013e-06	0.0106551	0.315438	0.129821	0.132487
Crispld2	444	4.71401e-16	3.58297e-15	0.339581	-0.508652	0.415821	0.309291
Sf3b5	444	1.04704e-08	4.59461e-08	-0.495313	-0.116648	0.151125	0.308943
Bst1	444	3.89546e-07	1.45557e-06	0.0874529	0.104061	0.0555804	0.0362049
Xbp1	445	5.48448e-14	3.6297e-13	0.445538	-0.352086	0.0806106	0.302104
Luc7l3	445	3.89919e-07	1.45574e-06	-0.308711	0.363527	-0.118769	0.113914
Vcam1	447	4.42681e-11	2.40745e-10	0.209247	-0.161712	0.238186	0.215394
Fbxo32	447	4.03949e-07	1.50686e-06	0.120182	0.289265	-0.0548674	-0.031618
Tpst2	448	6.24299e-16	4.70495e-15	0.25878	0.271118	0.449907	0.244295
Pold4	448	7.6796e-14	5.01539e-13	0.326492	-0.0969777	0.271236	0.133547
Ulk1	448	4.05062e-07	1.50975e-06	0.157624	0.211399	0.131499	0.0786248
Kif1a	449	7.0894e-14	4.64356e-13	0.210185	-0.315901	0.227805	0.0986529
Tril	450	3.37616e-11	1.85418e-10	0.118285	-0.099285	0.148063	0.13152
Noct	450	4.23916e-07	1.57738e-06	0.12714	0.318591	-0.0691521	-0.0509749
Col27a1	451	6.87558e-16	5.16422e-15	0.227965	-0.234187	0.299606	0.172861
Atp8b1	451	1.78959e-10	9.35546e-10	0.175323	0.00781496	0.153092	0.1809
Lrrfip1	451	4.31184e-07	1.60308e-06	-0.614445	0.355568	-0.709862	-0.816189
Col15a1	452	3.14068e-13	1.96194e-12	0.222654	-1.86602	0.288064	0.239775
Plscr1	452	4.31677e-07	1.60358e-06	-0.145947	0.253942	-0.159943	-0.104959
Fyb	453	1.86643e-08	8.01151e-08	0.127395	0.171749	0.116313	0.177942
Hspd1	453	4.3993e-07	1.63287e-06	-1.15122	0.491908	0.12215	-0.1958
Traf4	454	4.54332e-07	1.68493e-06	-0.15477	0.312264	0.0533352	-0.0677866
Sh2b3	455	2.77392e-15	1.99919e-14	0.239299	-0.10216	0.300278	0.23062
Dut	455	2.40756e-13	1.51673e-12	-0.842357	0.321133	0.396203	0.209833
Gas7	456	1.29573e-13	8.31579e-13	0.225621	0.0585885	0.223755	0.191614
Tmcc1	456	1.20361e-09	5.79554e-09	0.254343	0.279644	0.195428	0.0694598
Dhrs3	457	5.03122e-07	1.85352e-06	-0.0339768	0.151975	-0.103172	-0.064896
Flrt3	458	5.10092e-07	1.87764e-06	0.112146	0.165154	0.134959	0.0566199
Pink1	459	1.75802e-13	1.12181e-12	0.309733	0.142083	0.139123	0.183846
Mzt2	459	1.60045e-09	7.59168e-09	0.170824	0.289181	0.295954	0.172314
Cacna1g	460	1.63611e-13	1.04551e-12	0.154834	0.0395564	0.186168	0.150711
Cd200	460	5.61622e-07	2.05882e-06	0.101375	0.210005	0.032686	-0.011437
Hmcn1	462	1.81385e-13	1.15413e-12	0.261494	-0.0490762	0.281303	0.169688
Arhgap32	462	6.06352e-07	2.2155e-06	0.110757	0.207302	0.0670724	0.111941
Spry4	463	2.67611e-15	1.93497e-14	0.168812	0.0611363	0.215185	0.127157
Arhgap22	464	4.07436e-12	2.37314e-11	0.139652	0.0754673	0.163455	0.137382
Nop2	464	6.49151e-10	3.19483e-09	-0.00442598	0.278857	0.306506	0.132115
S100a8	465	6.40774e-07	2.33935e-06	0.0906959	0.117634	0.0583378	0.10661
Gpc3	466	3.27346e-07	1.2335e-06	0.0851972	0.127116	0.139051	0.0681399
Ccl2	467	4.64302e-09	2.11021e-08	0.427996	-1.66904	0.417347	0.388614
Dap	468	3.90813e-15	2.79852e-14	-0.492534	0.0844765	0.500458	0.0922902
C1qtnf2	468	8.79491e-09	3.88231e-08	0.113262	-0.211396	0.122824	0.12051
Tsc22d1	468	7.03656e-07	2.55218e-06	-0.155486	0.470182	0.274527	-1.0303
Tead1	469	4.1012e-15	2.92736e-14	0.220194	0.0373616	0.352444	0.246433
Rspo3	469	1.04922e-07	4.1688e-07	0.0738943	0.133337	0.145905	0.107974
C1ra	470	2.70861e-13	1.69918e-12	0.243847	-0.310759	0.237351	0.171208
Rasl11b	470	1.07693e-09	5.20808e-09	0.188123	0.219107	0.239613	0.0620002
Glipr2	470	1.60254e-09	7.59332e-09	0.184028	-0.513627	0.181355	0.185819
Tmsb10	471	4.34575e-15	3.09201e-14	0.0960566	-0.47454	0.609136	0.320805
Fgf7	472	2.0624e-10	1.07062e-09	0.186767	0.198774	0.224442	0.152784
Slc39a10	473	5.58262e-15	3.93939e-14	0.110693	0.204656	0.328039	0.0821762
Anxa1	473	3.62837e-08	1.52528e-07	0.142084	-1.46069	-1.26576	0.557038
Prag1	473	8.93693e-07	3.21787e-06	0.111884	0.196135	0.118477	0.0366791
Il17rd	474	5.90468e-15	4.15473e-14	0.20647	0.130355	0.244287	0.180921
Apobec1	474	2.45767e-07	9.38002e-07	0.0470047	0.162296	0.172581	0.0973951
Rbm4b	475	1.00976e-10	5.3862e-10	0.250206	0.248556	0.274063	0.0458535
Kdm7a	478	4.69785e-13	2.91018e-12	0.309672	0.234244	0.267606	0.11877
Arl5b	478	9.23189e-07	3.31603e-06	0.169682	0.275012	0.112192	0.0128316
Srm	479	8.68132e-15	6.07011e-14	-0.380207	0.122203	0.53655	0.0984958
Epha4	479	4.09023e-09	1.87042e-08	0.166078	0.213373	0.216684	0.104854
Tspan6	480	9.13843e-15	6.36973e-14	0.224352	-0.759876	0.303476	0.219078
Gadd45a	480	5.28576e-13	3.25177e-12	0.462404	0.392224	0.298212	0.278329
Phlda1	480	1.12208e-06	4.01424e-06	0.208724	0.657193	0.320278	-0.215362
Lmo7	481	1.14118e-06	4.07603e-06	-0.0162802	0.152669	-0.187849	0.0205515
Ctsc	482	3.7137e-13	2.3134e-12	0.232078	0.368058	0.435978	0.0984709
Cbr2	483	1.36542e-06	4.84589e-06	-0.0321084	0.129345	-0.16171	-0.282524
Rnf139	484	4.58081e-07	1.69741e-06	0.178781	0.217159	0.18959	0.101691
Dusp18	485	2.92899e-10	1.50167e-09	0.212431	0.17238	0.107228	0.214754
Pcdh10	485	1.45704e-08	6.31289e-08	0.103246	0.115231	0.1229	0.0829515
Amn	486	1.81115e-14	1.24489e-13	0.0943872	-0.328088	0.207134	0.114914
Tmem37	486	3.61911e-08	1.52502e-07	0.141228	-0.243711	0.166637	0.142336
H19	486	1.39711e-06	4.94261e-06	-0.164419	0.169386	0.0439163	-0.518649
Il17re	487	1.40897e-06	4.97665e-06	-0.107276	0.114484	-0.269457	-0.158252
Fuca1	488	2.48662e-11	1.37412e-10	0.335173	-0.397389	0.340344	0.330856
Lrrc8d	488	1.43033e-06	5.04409e-06	0.0294499	0.142848	0.0223677	-0.00251698
Hsph1	489	3.12828e-12	1.83817e-11	0.226344	0.375146	0.468269	0.0387926
Pcdh19	489	4.84478e-09	2.19518e-08	0.101131	-0.361396	0.121697	0.110992
P3h1	490	2.99143e-14	2.02798e-13	0.170381	-0.401294	0.248809	0.132965
Iqsec1	490	6.31131e-10	3.11302e-09	0.177455	0.120833	0.185681	0.172314
Mat2a	490	7.12189e-09	3.16466e-08	0.386199	0.414895	0.444179	0.130958
Creb3l2	491	3.15379e-14	2.13156e-13	0.237623	0.0312916	0.365001	0.127919
Mylk	491	6.09544e-13	3.7447e-12	0.198931	-0.42697	0.222519	0.142521
Gsta4	491	1.83955e-06	6.44639e-06	-0.429181	0.30746	-0.232149	-0.167331
Carmil1	493	1.9546e-06	6.8388e-06	0.00142914	0.133648	-0.00543693	0.0460457
Camk2n1	494	1.28571e-12	7.77009e-12	0.24006	-0.0733292	0.143722	0.111487
Adamts2	494	9.93938e-09	4.37451e-08	0.136852	-2.05232	0.149141	0.14294
Ehd4	494	2.0267e-06	7.08551e-06	0.205893	0.319425	-0.0329897	0.155396
Rapgef4	495	7.39873e-13	4.52664e-12	0.191671	0.122916	0.209547	0.158688
Use1	495	2.04557e-06	7.14024e-06	-0.102839	0.417679	-0.192686	-0.599836
Utrn	496	1.33959e-12	8.08473e-12	0.248368	0.0106481	0.243948	0.174791
Cd34	496	7.30778e-11	3.94531e-10	0.118826	-0.0444339	0.173772	0.134011
Spsb1	498	4.7321e-14	3.15521e-13	0.24059	-0.026135	0.296277	0.0531301
Dlg4	498	1.39006e-12	8.37799e-12	0.176714	-0.00237806	0.192923	0.138022
Krcc1	498	2.24311e-06	7.81141e-06	-0.21354	0.273799	-0.217521	-0.00729381
Stxbp1	499	1.69415e-12	1.01695e-11	0.228447	-0.0546868	0.224795	0.167113
Shisa2	499	2.2682e-06	7.89264e-06	-0.28265	0.084879	-0.0807528	-0.117274
Chl1	500	2.31613e-06	8.05312e-06	-0.0923826	0.176956	0.0880756	-0.319204
Rarres2	501	5.56674e-08	2.28526e-07	0.181743	-1.46359	0.174119	0.197333
Gxylt2	501	1.37463e-07	5.40387e-07	0.0935244	0.162309	0.169412	0.0672434
Slit2	502	5.34506e-14	3.5427e-13	0.168178	-0.2356	0.268856	0.11031
Ash1l	502	2.26942e-12	1.34953e-11	0.36451	0.294569	0.205282	0.170608
Cited1	502	7.96005e-08	3.21433e-07	0.165358	0.160236	-0.0522625	0.131439
Appl2	502	1.14761e-07	4.53547e-07	0.0924842	0.0637494	-0.0137264	0.123916
Robo2	503	5.6967e-14	3.75898e-13	0.164633	-0.0587731	0.200564	0.13915
Ier5	503	2.79883e-12	1.64894e-11	0.511069	-0.356528	-0.137105	-0.118821
Creb3l1	503	2.42242e-09	1.13216e-08	0.141516	-0.608359	0.127144	0.138201
Rad52	503	4.45041e-08	1.84564e-07	0.182938	0.204095	0.198972	0.183753
Akap9	504	2.86724e-06	9.8921e-06	-0.0216618	0.306533	-0.144414	-0.102008
Agpat4	505	6.54075e-14	4.29683e-13	0.228275	-0.10612	0.335766	0.0863631
Hid1	505	2.92619e-06	1.00798e-05	0.0622189	0.106077	0.0117807	0.0388112
Mbnl2	506	7.69443e-14	5.01772e-13	0.172735	0.0522089	0.474369	0.118275
Ptprg	506	2.15864e-10	1.11797e-09	0.174053	-0.00771235	0.220329	0.191529
Eno1	506	3.07636e-06	1.05645e-05	-0.876745	0.460365	-0.0368516	-0.119069
Ghr	507	4.49686e-12	2.61475e-11	0.264468	-0.140795	0.220753	0.131435
Anks1b	507	3.71805e-09	1.71431e-08	0.106694	0.125553	0.161796	0.160014
Nasp	507	3.1845e-06	1.0919e-05	-0.281407	0.310423	0.261104	0.143838
Cst6	508	2.12549e-07	8.1401e-07	0.113334	0.130177	-0.0450987	0.0972439
Sh3bgrl3	509	8.69216e-14	5.6518e-13	0.0957777	-1.24862	0.534631	0.337196
Rassf9	509	3.29986e-06	1.12971e-05	0.0709766	0.0852824	0.0755188	0.0716408
Atp6v1e1	510	3.31633e-06	1.13448e-05	0.161928	0.37775	-0.183466	0.209899
Picalm	511	9.50677e-14	6.16349e-13	0.273808	-0.166447	0.329441	0.200287
Dennd3	511	2.53385e-06	8.78271e-06	0.091563	0.104002	0.0783899	0.0717473
St6galnac2	512	3.63742e-06	1.23956e-05	-0.131354	0.187312	0.00370845	0.0568697
Tspan18	513	1.03953e-13	6.71026e-13	0.127472	0.124282	0.231096	0.0720512
Wipf1	513	1.10952e-10	5.87608e-10	0.120513	0.0350466	0.147569	0.12128
Tnc	514	1.15755e-13	7.46123e-13	0.317318	-0.760354	0.402513	0.231852
Cd164	514	1.69448e-07	6.59145e-07	0.19721	0.116632	0.0921257	0.27428
Itga6	514	3.76562e-06	1.28031e-05	-0.312189	0.201243	-0.323973	-0.807155
Mtss1	515	3.88745e-06	1.31972e-05	0.00451691	0.260325	-0.055866	-0.137114
Nap1l1	516	1.34845e-13	8.64169e-13	-0.263878	0.274199	0.612389	0.411542
Ogfrl1	516	4.18497e-06	1.41748e-05	0.0226592	0.162216	-0.0861439	0.0632477
Acvrl1	517	9.94938e-12	5.64516e-11	0.202507	0.0815097	0.131447	0.151522
Flrt2	518	4.40913e-09	2.01006e-08	0.0969583	0.0503328	0.121892	0.110035
Angptl6	518	4.3103e-06	1.45771e-05	0.00511558	0.108698	0.0333836	0.0628686
Sh3pxd2b	519	1.17715e-11	6.63672e-11	0.224383	-0.136006	0.211361	0.179073
Stx11	520	1.26812e-11	7.13156e-11	0.233803	-0.106448	0.134021	0.117775
Itgbl1	520	1.3466e-09	6.44225e-09	0.130951	-0.586257	0.160806	0.127116
Nid2	521	2.56864e-09	1.19924e-08	0.0941442	-0.116111	0.142694	0.123796
Tuba4a	521	4.90368e-06	1.64713e-05	-1.05313	0.264559	-1.16539	-1.5758
Cygb	522	3.42961e-11	1.88122e-10	0.235961	-1.57391	0.247736	0.203121
Nupr1	523	2.7358e-10	1.4087e-09	0.466931	-1.68427	-0.707124	0.44428
Snrpb2	523	5.03959e-06	1.69024e-05	-0.255808	0.307593	0.139972	0.0907971
Scara3	524	4.75969e-08	1.96841e-07	0.144825	0.00564948	0.142223	0.145288
Cmbl	524	5.45372e-06	1.82364e-05	0.0774929	0.114794	0.0751294	0.0324226
Nbl1	525	1.59194e-11	8.90766e-11	0.230797	-1.24134	0.198718	0.0975071
Rnf149	526	1.59566e-11	8.91729e-11	0.318875	-0.175855	0.339117	0.23379
Steap3	526	1.86707e-08	8.01151e-08	0.179584	-0.31058	0.195521	0.183541
Ralgds	526	5.66089e-06	1.89149e-05	0.187908	0.263821	-0.120944	-0.269787
Aatk	527	2.83263e-06	9.78026e-06	0.0663628	0.0795571	0.0791646	0.066949
Lpin1	529	9.42139e-09	4.15474e-08	0.181515	0.189536	0.191801	0.141276
Olfm2	529	2.52595e-08	1.07456e-07	0.139026	0.0533301	0.15534	0.146589
Map6	530	2.42543e-12	1.44038e-11	0.144668	0.00941066	0.19026	0.147792
Edil3	531	2.99446e-13	1.87322e-12	0.124773	-0.115768	0.233495	0.0826205
Prpf40b	531	7.18965e-06	2.37205e-05	0.0807961	0.1129	0.0641058	0.0801922
Itgb5	532	2.38565e-09	1.11614e-08	0.210923	-0.979291	0.190334	0.209896
Nebl	532	7.22131e-06	2.38073e-05	0.0793994	0.138829	-0.136119	0.0406443
Abi3bp	533	3.93911e-09	1.80502e-08	0.166583	-0.0929779	0.186876	0.16707
Tuft1	533	7.60501e-06	2.50168e-05	-0.0574596	0.0935257	-0.408585	-0.00621732
Sat1	534	2.06024e-11	1.14418e-10	0.547476	-0.839252	0.0617141	0.411855
Stap2	534	8.13945e-06	2.67353e-05	-0.0549699	0.108049	-0.363593	-0.0756467
Tmem159	535	7.55556e-11	4.07415e-10	0.227346	-0.0266223	0.236505	0.211485
Stxbp2	535	8.2786e-06	2.71524e-05	-0.267123	0.0886349	-0.386258	-0.22103
Bid	536	8.33058e-06	2.73027e-05	-0.0735068	0.138966	0.0246114	0.0651282
Layn	537	4.3393e-13	2.69557e-12	0.122635	0.0537676	0.21904	0.115472
Hectd2	537	5.56693e-08	2.28526e-07	0.121134	0.16166	0.169524	0.138847
Gsdmd	537	6.60293e-08	2.68579e-07	0.111684	0.0328128	0.113877	0.11218
Arl13b	538	4.07601e-12	2.37314e-11	0.314934	-0.156655	0.358254	0.178932
Erbb3	538	8.47822e-06	2.77458e-05	-0.0878874	0.0915136	-0.182521	-0.0585967
Brpf1	539	8.74839e-06	2.8567e-05	0.119022	0.191495	0.129603	0.105981
Cdk4	540	5.2419e-13	3.23372e-12	-0.598893	0.160027	0.523948	0.307152
Slc38a2	540	1.18047e-06	4.20964e-06	0.195475	0.413021	0.278914	-0.369135
Amn1	541	8.83905e-06	2.88419e-05	0.13423	0.195582	0.0765199	0.126054
Prr7	542	7.187e-13	4.40315e-12	0.0581378	0.0506298	0.259199	0.0506142
Bcl10	542	3.31717e-11	1.82403e-10	0.38318	0.0703854	0.260761	0.167433
Clcn4	542	4.61374e-09	2.09904e-08	0.237757	-0.0133818	0.248973	0.230549
Bex3	542	9.41943e-06	3.06458e-05	-0.462622	0.343837	0.111516	0.0799694
Prelp	543	9.5271e-06	3.09509e-05	-0.0211496	0.28973	0.172765	-0.0201803
Srxn1	544	3.43852e-11	1.88379e-10	0.319762	-0.230223	0.241496	0.215636
Piezo2	544	2.48127e-08	1.05656e-07	0.13985	-0.362368	0.14718	0.145575
Clk1	544	9.78995e-06	3.17817e-05	0.18868	0.368222	-0.125364	-0.424842
Adamts5	545	7.12653e-09	3.16466e-08	0.171298	-0.234864	0.19235	0.176233
Hs3st3b1	545	1.00285e-05	3.25087e-05	0.0431946	0.0812059	0.0679182	0.0554712
Sbno2	546	4.2773e-11	2.33183e-10	0.305979	-0.061335	0.0984927	0.0839584
Gm4117	546	6.41376e-07	2.33963e-06	0.0628649	0.0701458	0.0736685	0.0878185
Them6	546	1.01085e-05	3.27442e-05	-0.161367	0.105003	0.0779889	0.0740752
Ak1	547	1.21456e-12	7.35006e-12	0.170773	-0.664571	0.264446	-0.033644
Hilpda	547	4.7129e-11	2.55991e-10	0.328433	-0.12247	0.307995	0.215884
Tlr2	547	1.05228e-05	3.40616e-05	0.151906	0.179034	-0.116911	0.0720231
Creld2	548	1.25414e-08	5.46033e-08	0.0347591	0.118125	0.285844	0.254857
Arxes1	548	7.14995e-07	2.5891e-06	0.0463017	0.0756384	0.0753292	0.0598648
Sptbn1	549	1.43588e-12	8.64244e-12	0.198627	-0.448768	0.454977	0.239047
Rtn4	549	5.28975e-11	2.86624e-10	0.426712	-0.183807	0.159775	-0.0936643
Dpm3	549	6.59389e-07	2.40337e-06	0.0715589	-0.315755	0.147604	0.269571
Ppm1d	549	1.09504e-05	3.53685e-05	0.0847397	0.162878	0.120758	0.0815897
Nes	550	3.66745e-07	1.37498e-06	0.117517	-0.290841	0.148491	0.150664
Chmp4c	550	1.09769e-05	3.54026e-05	-0.232025	0.111623	-0.414574	-0.246781
Pcbd1	551	1.2382e-07	4.87615e-07	0.0655209	0.156304	0.202282	0.145913
Tmsb15b1	551	1.11225e-05	3.58226e-05	-0.0153358	0.0718585	0.0191255	-0.00883032
Slco3a1	552	5.9641e-08	2.4438e-07	0.147743	-0.0503901	0.140471	0.148878
Tanc1	553	7.0673e-11	3.82012e-10	0.294878	0.171122	0.295461	0.107121
Zfhx3	555	8.50461e-11	4.5693e-10	0.16532	-0.296436	0.0912898	0.143969
Ncoa1	555	1.24441e-05	3.99611e-05	0.0765586	0.141286	0.0196778	-0.0140963
Mapre3	556	8.96497e-11	4.81084e-10	0.170285	0.073024	0.0902953	0.0449972
Olfr889	556	1.2949e-05	4.15526e-05	0.0338728	0.132582	0.114865	0.0582527
Nfatc4	557	2.60022e-12	1.53599e-11	0.15538	0.0524596	0.182688	0.139999
Crip2	557	1.39424e-05	4.45476e-05	-0.169426	0.424366	0.214244	-0.071664
Pdia5	558	1.19658e-09	5.76794e-09	0.0974608	-0.393213	0.145873	0.120665
Crabp2	558	1.43095e-05	4.56551e-05	0.15639	0.208342	0.0246039	0.105508
Ifitm3	559	9.6344e-11	5.15765e-10	0.487125	-1.14286	0.635773	0.179229
Plxnd1	559	1.61768e-07	6.31477e-07	0.0875561	-0.027468	0.110088	0.102869
Iah1	560	2.76066e-12	1.62861e-11	0.243972	0.110303	0.350851	0.158641
Bloc1s1	560	1.03401e-06	3.70512e-06	0.122937	-0.182045	0.149473	0.238049
Krt18	560	1.48883e-05	4.74339e-05	-1.80098	0.378936	-3.61226	-1.39925
Fkbp1a	561	2.98095e-12	1.75392e-11	-0.333329	-0.984942	0.51666	0.284865
Lpar1	561	1.55333e-10	8.16827e-10	0.150579	-0.229897	0.185559	0.151244
Nrg1	561	1.50621e-05	4.79534e-05	-0.392937	0.138818	0.0327779	-0.470223
Pde10a	562	9.44279e-10	4.60659e-09	0.150843	-0.141929	0.154661	0.139426
Ap1m2	562	1.54977e-05	4.92346e-05	-0.757152	0.0983643	-0.654804	-0.346316
Rabgef1	563	1.04701e-10	5.57156e-10	0.219585	-0.0411289	0.0446043	0.0773929
Tkt	563	1.57971e-05	5.0114e-05	-0.494573	0.332931	-0.309007	0.130845
Lif	564	1.6454e-05	5.21239e-05	0.0793011	0.126857	-0.132805	-0.10158
Fbln1	565	3.6527e-12	2.13786e-11	-0.354393	-0.361492	0.348069	-0.160353
Bmyc	565	4.3223e-10	2.18519e-09	0.0873456	0.193209	0.245919	0.187024
Gchfr	565	1.12532e-06	4.02262e-06	0.0495887	-0.146508	0.0746644	0.0773768
Rbm47	566	1.73268e-05	5.47719e-05	-0.101652	0.060746	-0.240861	-0.165377
Dusp3	567	4.99778e-07	1.84273e-06	0.16677	0.0421269	0.114196	0.165264
Phldb3	567	1.91473e-05	6.02276e-05	-0.0334698	0.0638748	-0.104043	-0.0526617
Ptgs2	569	2.70207e-07	1.026e-06	0.0893535	0.182524	0.213682	-0.0886711
Mrpl9	570	2.0226e-05	6.34414e-05	-0.263464	0.160667	-0.212078	-0.0629347
Syne1	571	1.59661e-10	8.38597e-10	0.184059	0.127543	0.187496	0.134614
Spire1	571	5.52345e-10	2.74876e-09	0.104525	-0.0321055	0.161897	0.137178
Tfcp2	571	2.0249e-05	6.34686e-05	0.0724545	0.119246	0.0963717	0.0784931
Raph1	572	2.13195e-05	6.64967e-05	0.0845306	0.286301	0.144948	-0.0103511
Ttc19	573	1.82728e-10	9.5301e-10	0.303764	0.0357441	0.311211	0.137317
Scpep1	573	5.19109e-10	2.59205e-09	0.189372	-0.219991	0.276118	0.215221
Sh3pxd2a	574	1.68063e-09	7.95485e-09	0.185497	0.0207313	0.199503	0.174121
Tnrc6b	574	2.19887e-05	6.83236e-05	0.145511	0.218489	0.111129	0.0842243
Slc1a5	575	5.54986e-12	3.21444e-11	0.195827	0.124345	0.335688	0.181589
Jam2	575	4.6509e-10	2.34069e-09	0.131118	-0.0951561	0.116633	0.118276
Eva1c	575	2.25386e-05	6.98102e-05	0.027604	0.0781722	0.0524159	-0.0177558
Tgfa	576	2.37081e-05	7.33815e-05	-0.0642661	0.103371	0.0606598	-0.1075
Amotl2	577	3.19159e-09	1.47768e-08	0.193845	0.153049	0.146491	0.186612
Stbd1	577	2.49732e-05	7.71363e-05	-0.108588	0.142407	-0.0246979	-0.0741144
Arhgef40	578	5.88179e-12	3.39346e-11	0.179426	0.109511	0.248545	0.12749
Pdzd2	578	2.65984e-05	8.18724e-05	0.0657334	0.0930397	0.0637016	0.0586934
Relb	579	2.9365e-10	1.50335e-09	0.315702	0.156422	0.191509	0.220417
Ptgs1	579	4.93227e-10	2.46835e-09	0.174088	0.102324	0.115048	0.155692
Vps13a	579	2.66771e-05	8.20578e-05	-0.158413	0.192813	-0.170583	-0.0370708
Ctsd	580	2.97266e-10	1.52012e-09	0.435408	-0.355399	-0.0282599	-0.221337
Ccdc66	580	2.6877e-05	8.26159e-05	0.0163191	0.121891	0.0933354	0.0400136
Has2	581	6.50047e-12	3.73107e-11	0.16683	0.0447257	0.209172	0.149435
Pdcd11	581	2.68989e-05	8.2626e-05	-0.0442063	0.148157	0.0797541	0.0638595
Grk3	582	2.72799e-05	8.36808e-05	0.0517509	0.0848552	0.0309487	0.0559357
Pdgfa	583	7.01898e-12	4.02349e-11	0.312908	-0.185887	0.443425	-0.010228
Plbd1	583	2.76792e-05	8.48473e-05	0.0292018	0.0755137	0.0699106	-0.00268656
Pja2	584	6.44504e-08	2.62397e-07	0.188693	0.204572	0.149727	0.114544
Htra1	585	7.53754e-12	4.30966e-11	0.126043	-1.35541	0.26888	0.0119816
Csf1	585	3.75068e-09	1.72756e-08	0.235424	-0.54096	0.17177	0.193883
Itga3	585	2.80567e-05	8.59454e-05	-0.0879165	0.0803165	0.0259164	-0.17501
Itga2b	586	6.07908e-08	2.48149e-07	0.107182	-0.034544	0.0885967	0.0989155
Rif1	586	2.84476e-05	8.70829e-05	-0.222793	0.169218	-0.000139529	-0.0360425
Ssh1	587	1.62041e-10	8.50093e-10	0.17795	-0.0976278	0.194797	0.154622
Paip2b	587	2.93767e-05	8.9742e-05	-0.136316	0.124912	-0.107448	-0.0813058
Hspb1	588	4.20164e-10	2.1266e-09	0.630767	0.465413	-0.66261	-0.561151
Itgb8	588	2.95896e-05	9.02684e-05	-0.0569978	0.120087	-0.106297	-0.043685
Tsen34	589	9.39133e-12	5.33533e-11	-0.00780053	-0.0263163	0.383491	0.272423
Grn	589	4.35644e-10	2.19995e-09	0.342393	-0.512913	0.076645	0.144549
Ripk2	589	1.2931e-07	5.08786e-07	0.139953	0.118078	0.169306	0.150597
Ereg	590	1.0789e-11	6.10597e-11	0.117253	0.0294978	0.20183	0.096587
Ikzf2	590	2.9953e-05	9.12727e-05	-0.00700866	0.0983147	-0.0627764	-0.0174026
Kazn	591	3.19773e-10	1.63334e-09	0.227431	-0.253398	0.254203	0.193351
Sipa1	591	2.90791e-07	1.10041e-06	0.0899932	0.0811575	0.171597	0.156257
Ttc39b	592	6.96362e-07	2.52985e-06	0.127379	-0.0326937	0.123921	0.151472
Efhd2	592	3.01432e-05	9.1769e-05	-0.219917	0.335087	-0.378524	-0.746091
Samd5	593	2.95514e-09	1.37106e-08	0.135605	0.113632	0.105132	0.121372
Swt1	593	1.54526e-05	4.91263e-05	0.213846	0.283528	0.0626924	-0.0804076
Ccdc186	594	5.21326e-10	2.60021e-09	0.259658	0.165356	0.160521	0.0379687
Nrxn1	594	1.84243e-07	7.1296e-07	0.137068	0.118643	0.14506	0.128527
Hacd4	594	3.11159e-07	1.17449e-06	0.113081	-0.0765829	0.0804717	0.114896
Npy	595	2.88686e-05	8.82502e-05	0.142677	0.160898	0.13583	0.0743613
Myo1e	596	5.54359e-10	2.75571e-09	0.234336	0.0321731	0.091066	0.164246
mt-Atp8	596	3.22725e-05	9.79167e-05	-0.211178	0.304526	-0.191259	-0.036596
Clcf1	597	5.67915e-10	2.81681e-09	0.210583	-0.0422102	0.210125	0.032639
Gtf2i	597	3.29454e-05	9.98903e-05	-0.117554	0.219266	-0.0540546	0.0339274
Plcd1	598	5.84229e-10	2.8945e-09	0.118672	-0.00302669	0.101697	0.0755154
Aldoc	598	3.37796e-05	0.000102211	-0.194089	0.242809	-0.416029	-0.213315
Pear1	599	1.69517e-08	7.28791e-08	0.114769	-0.142046	0.131576	0.109583
Hes1	599	6.61861e-07	2.41041e-06	0.31732	0.381606	0.193895	0.22046
Rab20	600	5.93907e-10	2.93918e-09	0.303923	0.0719583	0.307213	0.170699
Tnfaip2	600	4.40145e-06	1.48628e-05	0.160933	-0.511501	-0.0296458	0.226054
Srebf1	600	3.63501e-05	0.000109542	0.0361785	0.153084	0.0168301	0.0897397
Adamts9	601	1.7928e-11	9.99392e-11	0.145888	-0.0532908	0.222801	0.00157193
P2ry2	601	4.71548e-06	1.58631e-05	0.062739	-0.0680644	0.071884	0.0868648
Mettl7a1	601	3.20313e-05	9.72512e-05	0.0620505	0.138754	0.108236	0.0646557
Adgrl1	602	2.02172e-11	1.12418e-10	0.14481	-0.0838682	0.185563	0.101547
Cdc40	602	4.0166e-05	0.000120147	-0.0180043	0.19081	0.0900828	0.0344
Podxl2	603	2.23424e-11	1.23772e-10	0.160756	-0.0363201	0.174925	0.0978629
Gnb4	603	1.80317e-10	9.41541e-10	0.112149	-0.695563	0.238324	0.184511
Slc39a14	603	7.29388e-10	3.57785e-09	0.273295	0.0210445	0.255603	0.135756
Zcchc11	603	4.17054e-05	0.000124668	0.0240299	0.197346	0.0972694	-0.017267
Snapc4	604	2.09885e-05	6.55099e-05	0.0830873	0.118688	0.110935	0.0750833
Tspan5	605	3.22513e-11	1.77562e-10	0.243353	0.160274	0.301326	0.118027
Klf6	605	7.53298e-10	3.69108e-09	0.478585	-0.0410448	0.0465295	0.0627187
Rap2b	605	4.22681e-05	0.000126266	0.118926	0.198116	0.160668	-0.0737638
Klf4	606	8.09734e-10	3.96325e-09	0.516187	-0.28334	0.256536	0.00934314
Srrt	606	4.52409e-05	0.000134784	-0.240358	0.241774	0.159949	0.0163597
Rcan1	608	8.89483e-10	4.34403e-09	0.209364	-0.0114838	0.0754466	0.117472
Atf7ip	608	4.66375e-05	0.000138852	0.0331307	0.176591	0.146104	0.0497506
Gsdme	609	4.87222e-05	0.000144769	-0.00711448	0.108591	0.0387024	0.0117413
Eif4e3	610	9.53506e-10	4.63778e-09	0.19848	-0.280258	0.179961	0.149239
Ier5l	610	5.20814e-05	0.000154133	-0.00305612	0.117755	0.0404983	-0.0544327
Bbc3	611	1.90091e-07	7.34315e-07	0.144919	0.216393	0.23528	-0.0511474
Arhgef25	612	5.14565e-11	2.79156e-10	0.156264	-0.0156112	0.196854	0.115864
Ep300	614	5.91721e-05	0.000174422	0.0528313	0.165527	0.0409932	-0.0717164
Arhgef3	615	5.96214e-05	0.000175631	0.0356179	0.0884873	-0.00461777	-0.00825625
P4ha2	616	5.23592e-09	2.35326e-08	0.135645	-0.17069	0.115944	0.125233
Crot	616	4.8481e-07	1.79199e-06	0.160219	0.164567	0.195218	0.129343
Rbms3	617	8.32863e-11	4.48016e-10	0.109838	-0.172801	0.191024	0.0207798
Fabp7	617	6.30693e-05	0.000185297	-0.0947281	0.121182	0.102477	0.137166
Naglu	618	1.44457e-09	6.87407e-09	0.154563	-0.0549587	0.122702	0.11821
Gm45589	618	6.36208e-05	0.000186794	-0.146295	0.0752411	-0.114132	-0.0841567
Serpini1	619	9.52265e-11	5.10396e-10	0.162833	-0.0229348	0.230253	0.131224
Mef2a	619	1.45648e-09	6.92332e-09	0.232263	-0.20206	0.132665	0.124034
Notch2	619	5.70698e-06	1.90546e-05	0.108802	0.0369515	0.0784848	0.122155
Prdm5	620	1.00199e-10	5.35115e-10	0.103626	0.0801846	0.153597	0.106535
Runx1	620	1.60049e-09	7.59168e-09	0.31192	-0.147231	0.14605	0.0873528
Acap2	620	7.64967e-06	2.51451e-05	0.114899	0.00253289	-0.00829395	0.174723
Insc	620	8.87763e-06	2.89465e-05	0.0470953	0.0805418	0.0872541	0.0628791
Maf	621	1.02142e-10	5.44188e-10	0.0307128	-0.0872401	0.18748	-0.154851
Abcc1	621	6.14826e-06	2.04361e-05	0.133805	0.00755608	0.125743	0.159299
Arhgef5	621	6.75732e-05	0.000198268	-0.200614	0.119549	-0.445003	-0.265313
Slc4a7	622	3.59043e-08	1.51581e-07	0.193908	0.234081	0.296602	-0.0384645
Fxyd5	623	3.09829e-06	1.06316e-05	0.179488	-1.12224	0.170388	0.191995
Rem2	623	6.95439e-05	0.000203916	-0.0931794	0.0797669	-0.118411	-0.328368
Ehd1	624	1.0962e-10	5.81247e-10	0.310243	-0.0132956	0.364898	0.279699
Nipal1	624	1.88139e-06	6.58782e-06	0.16114	-0.473917	0.018086	0.171968
Leo1	624	6.96768e-05	0.000204171	0.0896378	0.184753	0.109017	0.10013
Hivep3	625	1.9654e-09	9.2438e-09	0.201874	-0.136465	0.106795	0.138829
Plp1	625	6.13672e-05	0.000180535	0.164025	0.138033	0.178007	0.130157
Steap4	626	2.28444e-09	1.07104e-08	0.258629	-0.458845	0.171662	0.0531264
Sipa1l2	626	7.7111e-07	2.78776e-06	0.0868063	-0.026459	0.0840153	0.083513
Ankhd1	626	7.05762e-05	0.000206399	0.0151953	0.191376	0.0262207	-0.0362711
Plekha4	627	1.22772e-10	6.48665e-10	0.141349	0.105605	0.170371	0.0805575
Flnc	627	2.37644e-09	1.113e-08	0.142526	0.0875626	0.127936	0.0709369
Galnt18	627	7.12556e-05	0.000208113	0.110275	0.137428	0.124678	-0.0465661
Fndc4	628	1.27579e-10	6.72472e-10	0.129779	0.0504449	0.205683	0.0523609
Car12	628	7.16497e-05	0.00020899	-0.10203	0.0949595	-0.013483	-0.0820531
Tagln	629	1.28269e-10	6.75309e-10	0.271107	-1.66551	0.31753	0.0135067
Papss2	629	8.27578e-08	3.33577e-07	0.118898	-0.0761761	0.11517	0.111457
Hbs1l	629	8.10903e-05	0.000234682	-0.389216	0.202307	-0.174228	-0.374981
Hmgn2	630	1.94719e-07	7.50892e-07	-0.820659	-0.0385823	0.255704	0.237339
Bcl3	630	8.29743e-05	0.000239668	0.162008	0.243421	0.14423	0.0208709
St3gal6	631	1.27802e-06	4.54292e-06	0.0682457	0.0535126	0.0896032	0.0821119
Ddah1	632	1.11257e-05	3.58226e-05	0.0234365	-0.168205	0.0578865	0.0767406
Olfm1	633	1.71356e-07	6.65987e-07	0.100544	-0.299941	0.107737	0.0964724
Scd1	633	1.96153e-05	6.15691e-05	0.129349	0.182281	0.00162947	0.193044
Kdm6b	634	3.02063e-09	1.39999e-08	0.309262	-0.0365314	0.214856	0.0481101
Lsp1	634	1.37908e-06	4.88656e-06	0.149899	-0.047109	0.168849	0.159245
Coro1b	634	9.40499e-05	0.000270083	0.0206205	0.213252	-0.0209412	0.142696
Slc27a3	636	2.92984e-10	1.50167e-09	0.0521827	0.133261	0.172815	0.00629063
Vat1	636	3.38876e-09	1.56572e-08	0.279713	-0.45892	0.242805	0.131172
Plod2	638	1.92096e-10	9.98361e-10	0.0938568	-0.113285	0.207227	0.0821932
Psat1	638	0.000113663	0.000322327	-0.58904	0.147743	0.0658963	-0.0249174
Tiparp	639	3.86794e-09	1.77606e-08	0.29203	-0.0214432	0.30099	-0.011816
Arid4a	639	0.00011369	0.000322327	-0.0377007	0.21928	0.00585171	-0.228647
Bhlhe40	640	2.07467e-10	1.07574e-09	0.336038	0.314852	0.427015	0.0721354
Rnf122	640	3.90152e-09	1.78963e-08	0.221725	-0.0938493	0.23264	0.142108
Csnk1e	641	2.09704e-08	8.96372e-08	0.23936	0.149445	0.144298	0.218445
Trpm4	641	0.000128758	0.000363889	0.0253743	0.153865	0.123417	-0.211389
Serpine2	643	2.40701e-10	1.24227e-09	-0.344388	-2.44961	0.753553	-0.804267
Lsm3	643	4.59464e-06	1.548e-05	-0.563423	0.256404	0.279405	0.167872
Kcnk2	644	0.000136325	0.000384055	0.0228169	0.0768008	-0.0126501	-0.0235109
Dgkh	645	3.70053e-08	1.55346e-07	0.139449	-0.148639	0.167793	0.139782
Asns	645	0.000138553	0.000389742	-0.352082	0.162193	-0.0392663	-0.0929236
Olfml2b	646	9.24409e-06	3.00973e-05	0.0842712	-0.479843	0.0817783	0.0921189
Epas1	647	5.09576e-09	2.29722e-08	0.200391	-0.189859	0.153079	0.116287
Pim3	647	0.000145087	0.000407195	-0.164335	0.243564	-0.111327	-0.307094
Col8a2	648	9.70027e-08	3.87489e-07	0.0861777	-0.131901	0.0981072	0.0838768
Rgs3	650	6.22155e-09	2.78221e-08	0.166604	-0.101671	0.154961	0.131283
Rfc3	650	0.000157927	0.000441008	-0.542708	0.146836	0.0468776	-0.0582152
Lrrc8e	651	0.000160708	0.000447931	-0.00634085	0.0495871	-0.0810996	-0.0298894
Rab34	652	3.73303e-10	1.89805e-09	0.149257	0.106631	0.319784	0.0641458
Elovl7	652	0.00016216	0.000451254	-0.0410597	0.0605031	-0.259751	-0.0341224
Tyk2	653	0.000162602	0.000452078	0.046919	0.0937435	0.0151254	0.0319795
Pcdh18	654	4.15555e-10	2.10807e-09	0.0439771	0.121481	0.192287	0.0139906
Fads3	654	1.81279e-05	5.71824e-05	0.0441992	-0.120391	0.0741203	0.193545
Lsr	654	0.000165334	0.0004591	-0.883951	0.150834	-0.916228	-0.955193
Rab3il1	655	4.17852e-10	2.11731e-09	0.116429	-0.00893328	0.140138	0.0897353
Gcc2	655	0.000171873	0.000476367	-0.00728426	0.15347	-0.0128881	0.109936
Mdfic	656	1.89363e-05	5.9648e-05	0.105163	0.0230898	0.107276	0.127649
Anp32a	656	9.02019e-05	0.000259534	-0.292224	0.252862	0.0219772	0.209637
Ace	657	1.89627e-05	5.9689e-05	0.0581013	-0.0732758	0.0160688	0.0692255
Park7	657	0.000182318	0.000504063	-0.728623	0.322245	-0.155876	-0.120953
Peli2	659	4.82272e-10	2.41896e-09	0.0936481	0.0696337	0.156663	0.0910671
Cmklr1	659	6.50284e-06	2.15183e-05	0.0850344	-0.0769461	0.0993566	0.0944496
Pde9a	659	0.000194636	0.000535789	0.00931831	0.0535793	-0.0642346	0.0259337
Alcam	661	0.000218689	0.000597937	-0.242541	0.124	-0.518384	-0.371155
Col16a1	662	5.46039e-10	2.72042e-09	0.21168	-0.224752	0.331763	-0.0176042
Eif4ebp1	662	2.02682e-05	6.34842e-05	-0.36452	0.0802313	0.247082	0.280168
Vldlr	662	0.000225962	0.000615934	0.0257417	0.129295	0.095094	0.0430801
Rhbdf1	663	1.01795e-08	4.47136e-08	0.244292	0.0934251	0.129565	0.166284
Gm33651	663	0.000227169	0.000618554	0.0149955	0.079381	0.091124	0.0224685
Cntn1	664	1.13027e-07	4.47088e-07	0.0618108	-0.255133	0.0954955	0.0799607
Ptpn18	664	0.000227821	0.000619862	-0.214735	0.115681	-0.522281	-0.0767493
Piwil2	665	0.00023397	0.000635428	-0.054417	0.0666298	-0.00170756	0.0179273
Gm1673	666	6.30306e-10	3.1124e-09	0.149007	0.0663702	0.226756	0.107877
Lipa	666	2.13597e-05	6.65752e-05	0.145619	-0.0927758	-0.00290801	0.154119
Zfp711	666	0.000235859	0.000640168	0.0132009	0.0504213	0.025458	-0.0111066
Ptpn14	667	0.000210659	0.000577401	0.059734	0.107495	0.104374	-0.00306759
Thbs4	668	5.9297e-06	1.97834e-05	0.188438	0.174648	0.207019	0.199332
Pros1	669	6.99961e-10	3.44109e-09	0.137559	-0.703883	0.205589	0.0471517
Afap1l2	669	0.000251789	0.000681743	0.0338755	0.111485	0.102142	0.0420113
Nectin2	671	0.000260291	0.000703481	0.0972794	0.228445	-0.150744	-0.0148651
Lhfpl2	672	9.60752e-10	4.66651e-09	0.101523	-0.14436	0.240422	0.12023
Car6	672	2.40905e-05	7.45134e-05	0.112968	0.142123	0.143938	0.161217
Magi1	672	0.000265689	0.000716331	0.0444368	0.0997142	0.0421478	0.0119245
Foxj1	673	0.000168675	0.000468087	0.0667419	0.0807459	0.0586313	0.0370438
Metrn	674	6.44126e-09	2.87181e-08	-0.0691405	0.117897	0.22501	0.170542
Mapk13	674	0.000276282	0.000742643	-0.425237	0.0852656	-0.405875	-0.365982
Sardh	675	1.83213e-06	6.42545e-06	0.101558	-0.00580506	0.0942872	0.0980953
Lbp	675	0.000278487	0.000747668	0.0211027	0.245399	-0.414474	-0.642305
Tgfbr1	677	1.52782e-08	6.61312e-08	0.216883	-0.0110142	0.203783	0.129807
Orc3	677	0.000209806	0.000575416	0.021029	0.0919239	0.0774698	0.0795503
Gpm6b	678	1.33941e-09	6.41476e-09	0.221778	0.2533	0.453021	0.320797
Ecm2	678	8.94275e-06	2.91375e-05	0.078329	-0.263901	0.0777936	0.0798723
Echdc3	678	0.00028859	0.000774326	0.0160467	0.0715863	-0.177138	0.00537687
Hnrnpm	679	0.00029009	0.000777412	-0.537985	0.249922	0.0273785	0.0213625
Rnf215	680	1.35405e-09	6.47094e-09	0.151729	0.102632	0.200442	0.146652
Fmo1	680	5.76385e-08	2.36392e-07	0.12561	-0.11121	0.0195547	0.09072
Trafd1	680	0.000146188	0.000410027	0.126953	0.152996	-0.134911	0.0673282
Gpr153	681	1.4144e-09	6.73769e-09	0.133777	-0.244124	0.168293	0.0916355
Pim1	681	1.62002e-08	6.99861e-08	0.358078	0.0737744	0.114595	-0.140095
Pkp4	681	0.000295189	0.000790128	-0.136558	0.128557	-0.0990247	-0.182256
Arhgap31	682	1.62539e-08	7.01499e-08	0.186644	-0.188967	0.178942	0.152019
Cflar	682	1.6758e-07	6.53019e-07	0.230776	0.190035	0.0764879	0.209636
Tex9	682	0.000300994	0.000804698	-0.00906209	0.101689	0.05389	0.0315352
Sparcl1	683	1.6603e-08	7.15875e-08	0.300035	-1.16053	0.280399	0.223151
Slc9a3r1	683	0.000301912	0.000806669	-0.35748	0.183178	-0.634437	-0.294727
Mthfd2	684	1.8003e-09	8.48521e-09	-0.198878	0.118732	0.280055	0.101031
Notch3	684	3.76851e-05	0.000113259	0.077263	-0.463428	-0.0348377	0.114213
Sema3c	684	0.000100482	0.00028689	-0.00138258	0.112384	0.109356	-0.0670092
Cuedc2	685	1.87159e-09	8.81193e-09	-0.110014	0.220946	0.364011	-0.0226258
Dgat2	685	0.000302177	0.000806893	0.0535737	0.0834692	0.0299132	0.0306717
Lrrc32	686	2.67784e-06	9.26737e-06	0.0845418	-0.373124	0.0913935	0.0846647
2810403A07Rik	686	0.000304287	0.000812039	0.059588	0.189883	0.0941991	0.0156725
Gja1	687	2.19169e-09	1.02973e-08	0.0437802	0.156515	0.378799	-0.148899
Snrpf	687	3.68346e-07	1.37867e-06	-0.631791	0.144126	0.359339	0.302673
Gm11266	688	0.000307291	0.000818585	0.0174117	0.0436302	0.0173552	0.0248005
Fam181b	689	0.000313463	0.000834528	-0.115168	0.0472272	0.0259973	-0.00173111
Eno2	691	2.22233e-08	9.48109e-08	0.142527	0.0830479	0.129841	0.109374
Sorbs2	691	0.000328078	0.000871354	-0.220741	0.0865193	-0.387025	-0.104751
2700081O15Rik	692	2.68555e-09	1.25251e-08	0.133849	0.00766142	0.161181	0.114208
Nfatc2	692	6.98384e-07	2.53513e-06	0.14399	0.143301	0.157909	-0.10396
Itga1	693	2.74275e-09	1.27651e-08	0.0694935	-0.618672	0.153262	0.101847
Wnt4	693	0.000332561	0.000882732	0.0644969	0.0661925	0.00847501	0.0257133
Ccdc88a	694	2.75275e-09	1.27983e-08	0.0415787	0.114914	0.335239	0.0999707
Shb	694	0.000333926	0.000885828	0.0580069	0.0907445	0.0148329	0.0385775
Nfkbia	695	2.54677e-08	1.08238e-07	0.520001	0.0283241	0.0997795	0.064143
Krt8	695	0.000335351	0.000889079	-1.3691	0.312798	-3.29995	-1.19636
Phldb1	696	4.89238e-09	2.2145e-08	0.160266	-0.176928	0.186521	0.135442
Fam60a	696	0.000338096	0.000895825	-0.216317	0.124423	0.0425902	-0.0343209
Rnase4	697	3.25256e-09	1.50435e-08	0.0947393	-1.23771	0.356878	-0.476671
Heca	697	5.83424e-07	2.13523e-06	0.133315	0.0939705	0.135844	0.125359
Pea15a	698	4.92556e-05	0.000146159	0.140475	-0.300408	-0.0723116	0.174493
Ptch1	698	0.000342797	0.000906662	0.0347286	0.124109	0.0924017	0.0547342
H13	699	1.38824e-06	4.91513e-06	0.270094	-0.209556	0.237469	0.262669
Slc7a11	699	0.000172811	0.00047867	0.0678274	0.0501782	0.0777758	0.0627515
Fzd1	701	3.79203e-09	1.74481e-08	0.184458	-0.204786	0.23173	0.0649821
Ier3	701	0.000348094	0.000920125	-0.103598	0.488706	-0.0944694	-0.79376
Ctla2a	702	7.01811e-08	2.84687e-07	0.212024	-0.323296	0.246132	0.199514
Gm19935	702	3.16284e-05	9.60933e-05	0.0432023	0.0581024	0.0668071	0.0254157
Hmgb2	703	0.00036884	0.000972655	-2.07543	0.24595	-0.165546	-0.330328
Tslp	704	2.88769e-07	1.09369e-06	0.124299	0.0503881	0.0841217	0.110141
Map1a	705	4.2851e-09	1.95752e-08	0.106524	-0.18271	0.133041	0.0789752
S100a13	705	3.62999e-08	1.52528e-07	0.301953	-0.634741	0.0852848	0.016157
Bex2	705	0.000380019	0.00100095	0.022978	0.0896105	0.0806251	0.0680934
Tbx2	706	4.35202e-09	1.98605e-08	0.0895826	0.0445577	0.138902	0.091322
Nt5c2	706	0.000382584	0.00100711	-0.0222332	0.109147	-0.0538286	0.0554589
Prkar1b	707	6.52934e-09	2.90526e-08	0.111394	0.00169002	0.129093	0.0657001
Cdk19	707	0.000383511	0.00100895	0.0304886	0.111938	-0.0270434	0.0266366
Etv5	708	4.42644e-09	2.01589e-08	0.0225127	0.0643765	0.175181	0.102694
Bcat1	708	1.37843e-06	4.88656e-06	0.0525612	-0.0194764	0.0951018	0.0820783
Setd1b	708	0.000136622	0.000384649	0.0965164	0.11032	0.0125641	0.0335814
Nsmf	709	4.39211e-08	1.82486e-07	0.180556	0.0788394	0.110135	0.11132
Daam1	709	0.000407121	0.00106666	-0.0586696	0.118713	-0.15618	-0.0500437
Atp1b1	710	0.00041171	0.00107678	-0.323404	0.143274	-1.62498	-0.113026
Skil	711	4.82185e-08	1.99226e-07	0.255573	0.251331	-0.0131078	0.0662601
Ctdsp2	711	1.21055e-06	4.31342e-06	0.172178	-0.0159402	0.213032	0.199971
Nnmt	712	2.93416e-07	1.1094e-06	0.124547	-0.558585	0.124152	0.108799
Nr2f2	713	4.93548e-09	2.23174e-08	0.0993956	-0.158028	0.14439	0.0886172
Tchp	713	0.000436558	0.00113909	0.0210206	0.0767441	0.0550157	0.0516442
Nktr	714	5.09188e-08	2.10188e-07	0.311355	-0.12736	0.114882	0.0801921
Ankrd10	714	0.000441459	0.0011512	-0.215026	0.203882	0.147185	-0.254758
Tor3a	715	5.13394e-08	2.11728e-07	0.197205	-0.068522	0.0457982	0.00737059
Pag1	715	0.000453295	0.00118	0.0438514	0.0945168	0.049407	0.00513552
Pgrmc1	716	1.71524e-07	6.66056e-07	0.277114	-0.0996403	0.193488	0.274609
Rangap1	716	0.000473532	0.0012298	-0.389272	0.171724	0.0237085	0.0260629
Pdgfd	717	6.13626e-09	2.74683e-08	0.132804	0.105784	0.160232	0.102032
Pitpnc1	717	0.000476719	0.00123736	0.149199	0.169964	0.110069	0.0145433
Stc1	718	4.25596e-05	0.000127051	0.0864191	-0.136037	0.0541339	0.0899858
Hddc2	718	0.000486418	0.0012618	-0.463862	0.207106	-0.148143	0.0709582
Cotl1	719	6.41025e-09	2.86085e-08	0.00593243	-1.09761	0.339499	0.00807315
Adgrf5	719	1.11312e-05	3.58226e-05	0.0614738	-0.185078	0.0550738	0.0531081
Lamb3	719	0.000495988	0.00128587	-0.18305	0.059484	-0.25263	-0.422169
Col5a3	720	4.56084e-06	1.53777e-05	0.11601	-1.81458	0.131303	0.116572
P2rx7	720	0.000496895	0.00128748	0.0875348	0.151493	0.0918661	0.0632603
Snai2	721	6.48648e-09	2.88908e-08	-0.0111125	0.100829	0.146872	-0.146671
Coq8b	721	6.07371e-08	2.48149e-07	0.166797	0.0412321	0.142857	0.0709471
Dennd2c	721	0.000500156	0.00129468	0.00479992	0.0883449	0.0174209	-0.239484
Cldn3	722	0.000517143	0.00133683	-1.21676	0.265878	-3.15164	-0.512705
Nr1d2	723	8.57525e-07	3.09515e-06	0.131894	0.07294	0.0757708	0.126652
Ston2	723	0.000518135	0.00133831	-0.108341	0.0588038	0.0057493	-0.171623
Vps13c	724	9.33039e-05	0.000268113	0.0464361	-0.0322197	0.0606714	0.092845
Arhgap42	724	0.000518318	0.00133831	0.12292	0.206616	0.0311647	-0.134392
3010003L21Rik	725	0.000259216	0.000701427	0.0236445	0.107593	0.0965889	0.0413867
Cers4	727	3.33843e-08	1.41076e-07	0.179042	0.119328	0.199815	0.100891
Pthlh	727	0.000539769	0.00139208	-0.191612	0.0616104	-0.0893846	-0.32965
Trim24	728	0.000540497	0.00139316	-0.0185113	0.122209	0.0104021	-0.00992444
Fchsd2	729	7.30611e-08	2.95562e-07	0.139568	0.0820398	0.155705	0.127965
Fnbp4	729	0.000559383	0.00143934	0.0931682	0.184836	0.103376	0.108132
Kif26b	730	1.43586e-05	4.57789e-05	0.0777122	-0.0274519	0.111604	0.107225
Atrx	730	0.000562675	0.00144697	-0.308776	0.300374	-0.30125	-0.407517
Slc40a1	731	0.000584795	0.00150126	0.0534495	0.0725376	0.00909569	0.00300817
Acta2	732	7.92457e-09	3.51205e-08	0.0279593	-2.04754	0.343168	-0.513245
Rnf125	732	0.000105531	0.000300727	0.0592607	-0.133861	0.000666515	0.0864298
Epcam	732	0.000593618	0.00152215	-2.7171	0.325817	-3.862	-3.01483
C1qbp	733	0.000596565	0.00152883	-0.963763	0.267707	0.0345728	-0.0943577
Cyp51	734	8.56413e-09	3.78795e-08	0.0891606	-0.133834	0.272722	0.177963
Nbeal1	734	9.57318e-08	3.82755e-07	0.253919	0.0442447	-0.0128524	0.0384798
Lpl	734	0.000111084	0.000315743	0.0753038	-2.31483	0.125088	0.125035
Fam210b	734	0.000597767	0.00153103	-0.00983374	0.11307	-0.0867507	0.0105127
Has1	735	4.12576e-08	1.7174e-07	0.178628	-1.12008	0.202113	0.150272
Baz2b	736	9.78787e-08	3.90288e-07	0.259467	0.218953	0.211951	0.120233
Eps8l2	736	0.000611679	0.00156576	-0.0887464	0.0660655	-0.246022	-0.130722
Smarcd3	737	1.00592e-07	4.00391e-07	0.120914	0.0781464	0.124186	0.0637734
Fam174b	737	0.000112774	0.000320341	0.0483328	-0.00470374	0.00545016	0.0583924
Paics	737	0.000641822	0.00164009	-0.914535	0.226209	-0.245333	-0.527755
Adora2b	738	9.6622e-09	4.25672e-08	0.0428078	-0.0547666	0.129802	-0.0895576
Tgfbr2	738	5.94375e-06	1.98155e-05	0.127052	-0.37829	0.082865	0.122501
Il1rap	738	0.000648619	0.00165461	-0.00153808	0.0939255	0.00985588	-0.0428396
Adamts1	739	1.01048e-08	4.44291e-08	0.246793	-0.491939	0.45704	-0.136183
Hsd17b11	739	1.08124e-05	3.49481e-05	0.120804	0.00394094	0.0142614	0.115419
Ggt5	740	1.05578e-07	4.19114e-07	0.110816	-0.119514	0.108977	0.0521274
Snrpd3	740	0.000128412	0.000363141	-0.5548	0.235813	0.255483	0.269382
Rab27b	740	0.000675356	0.00171986	0.00851003	0.0580528	-0.0823392	-0.0353256
Mcam	741	1.07327e-08	4.70507e-08	0.14883	-0.118045	0.196314	0.104023
Tmem2	741	1.06466e-07	4.21886e-07	0.226224	-0.0437472	0.179423	0.160403
G6pc3	741	0.000129761	0.000366489	0.000106023	-0.00486824	0.111047	0.145006
Smoc1	741	0.000682837	0.00173693	0.0309038	0.0448576	-0.0118043	0.0401366
Alad	742	0.00013023	0.000367351	-0.138557	-0.345768	-0.0291468	0.153299
Trpv4	742	0.000684602	0.00174042	-0.0181235	0.0573257	-0.0349387	-0.0563769
Qsox1	743	1.20858e-07	4.76795e-07	0.214855	0.00977274	-0.0233254	0.170372
Spry2	743	2.86025e-05	8.74968e-05	0.173506	0.161471	0.103256	0.118176
Socs1	744	1.1002e-08	4.81836e-08	0.0965403	-0.0442628	0.201317	0.0156224
Hhipl2	744	0.000690698	0.00175492	-0.0038889	0.0624629	-0.162252	0.0362936
Bdh2	745	5.67422e-05	0.000167482	0.0651515	0.0147004	0.0789385	0.0744562
Mgst1	746	0.000714812	0.00181308	-0.0394399	0.389622	-0.703021	0.176543
Pglyrp1	747	0.000718555	0.00182154	-0.265742	0.0779287	-0.529677	-0.0943197
Ilvbl	748	6.56122e-06	2.16793e-05	0.155907	0.134511	0.094204	0.164713
Thap3	748	0.000736129	0.00186079	0.0850376	0.164479	0.029733	0.143092
Map3k8	749	1.48857e-07	5.83121e-07	0.21161	0.171138	-0.0129238	0.0733535
Tcim	749	7.14948e-07	2.5891e-06	0.373648	0.328917	0.298334	0.0465205
Prex2	749	2.19541e-05	6.82845e-05	0.0778009	-0.168619	0.0818956	0.0763092
Hdac5	750	1.66924e-07	6.51034e-07	0.18194	0.10789	0.0933353	0.163908
Wsb1	750	9.13217e-07	3.28552e-06	0.243981	0.259009	0.294841	-0.0810326
Pan3	751	0.000512895	0.00132662	0.119843	0.167185	0.036768	0.037537
Zfp296	752	0.000766988	0.00193222	-0.0700288	0.0461743	-0.0590137	-0.109787
Chmp6	753	0.000152863	0.000428059	-0.133388	0.0248203	0.0314086	0.131454
Zfp280d	753	0.000787143	0.0019774	0.0557159	0.114523	0.0376826	0.0776988
Adgre5	755	3.81254e-05	0.000114428	0.106628	-0.378764	0.0874771	0.109452
Bricd5	755	0.000798923	0.00200586	-0.0140373	0.0728612	0.0066628	-0.0279484
Nrp2	756	1.88307e-07	7.28056e-07	0.185865	-0.0119688	0.122583	0.109076
Med24	756	0.000158836	0.000442991	0.0712877	0.0656327	0.0924459	0.117097
Scrg1	756	0.00081622	0.00204814	0.0885017	0.0997189	0.106431	0.0258509
Zbtb7c	757	8.23304e-05	0.000237962	0.0772018	0.0702075	0.0556011	0.0864506
Rpa3	757	0.000817993	0.00205143	-0.532743	0.169082	0.0305738	0.0820084
Cenpc1	758	1.99095e-08	8.51843e-08	0.10202	0.0813838	0.185475	0.076535
Rps6ka3	758	1.91466e-07	7.38986e-07	0.180795	0.0913954	0.170249	0.130913
Ar	759	2.01964e-07	7.75473e-07	0.125193	0.0947798	0.076255	0.0808012
Wdr70	759	0.000825944	0.00206904	-0.0350204	0.126317	0.0729708	0.0468958
Synpo	760	2.09439e-07	8.02789e-07	0.179753	0.130686	0.149765	0.0575188
Gigyf1	760	0.000830811	0.0020789	0.0263533	0.0969107	0.041488	0.0509609
Aldh1a3	762	0.000185502	0.000511595	-0.0319502	0.133574	-0.160514	0.139893
Kansl1l	763	0.000873733	0.00218017	0.0646685	0.156628	0.00418742	-0.0883233
Pik3r1	765	2.29655e-07	8.77258e-07	0.254025	-0.0559093	0.134262	0.155281
Vangl2	765	0.000888416	0.00221557	-0.0189838	0.0824321	0.00616659	-0.015038
Tecpr1	766	9.46784e-06	3.07809e-05	0.122191	0.119686	0.0281167	0.0384924
Lrp4	767	0.000768506	0.00193495	0.04735	0.0641241	0.0565722	0.0150702
Insig1	768	2.56529e-08	1.08921e-07	0.121258	-0.0733732	0.190451	0.124426
Limd1	768	2.50576e-07	9.55535e-07	0.203656	-0.289946	0.196825	0.108102
Zyx	768	5.11102e-07	1.87867e-06	0.229243	0.106122	0.100253	0.216775
Cd27	768	0.000980839	0.00243923	0.0390225	0.0640433	-0.0075366	-0.00888107
Cpeb4	769	2.5251e-07	9.61263e-07	0.130036	-0.184406	0.00684667	0.0509063
Stx3	769	0.00100184	0.00248869	-0.0355408	0.186087	-0.360056	-0.323253
Tns3	770	2.68457e-08	1.13877e-07	0.0489548	0.0763955	0.225638	-0.0689846
Slc35f5	770	2.58577e-07	9.82682e-07	0.199125	0.0816639	-0.0133702	0.121723
Tob1	771	2.70624e-05	8.30709e-05	0.199917	0.239665	0.111426	-0.0686877
Epn2	771	0.000217749	0.000595735	0.0572666	0.0806817	0.0455761	0.141281
Cdr2	772	3.23336e-08	1.36765e-07	0.125305	-0.210459	0.174115	0.0414295
Pcsk6	773	0.00104416	0.00258802	-0.0384825	0.0708937	-0.00182584	-0.0173609
Itpkb	774	2.77194e-07	1.05164e-06	0.148929	0.0172337	0.138096	0.0818111
Aldh3b1	774	5.07802e-06	1.70184e-05	0.0931469	0.0503683	0.051739	0.0795468
Comp	774	0.000152906	0.000428059	0.0592881	0.0664613	0.0680577	0.0662125
Rpf2	775	0.00106904	0.00264823	-0.198338	0.13502	0.1123	0.025394
Apbb1ip	776	3.6231e-08	1.52527e-07	0.0968565	-0.245211	0.137492	0.0917204
Tle2	776	6.91045e-06	2.28163e-05	0.0854837	0.0638596	0.0719066	0.084981
Thoc1	776	0.00107237	0.00265498	-0.0407743	0.137719	0.059435	0.0311981
Srpx2	777	3.38788e-05	0.000102441	0.0752025	-0.673003	0.0767499	0.0746439
Mphosph8	777	0.00107403	0.00265764	-0.153121	0.194225	0.118391	-0.165324
Egfr	778	3.0389e-07	1.14803e-06	0.143045	-0.227142	0.10649	0.0928501
Clk4	778	0.00107674	0.00266284	0.0736412	0.202233	-0.0294786	-0.0864586
Cdc42ep5	779	0.000277389	0.000745169	0.142638	0.0967384	0.123765	0.177312
Ptprz1	779	0.00108668	0.00268446	-0.133213	0.0497677	-0.169762	-0.0620575
Siva1	780	3.74297e-08	1.56979e-07	-0.761065	0.111873	0.323464	-0.138255
Zfp219	780	0.00109935	0.00271425	0.0392872	0.0954178	0.0543353	-0.0147628
Alkbh1	781	3.85817e-08	1.61355e-07	0.174131	0.0372291	0.307709	0.0634254
Lrrc17	781	2.09768e-05	6.55099e-05	0.0775274	-0.0880956	0.0900709	0.0822467
Sema5a	782	3.8919e-08	1.6246e-07	0.115734	0.0871782	0.225343	0.0161303
Postn	782	3.57663e-07	1.3432e-06	0.42956	-1.49949	0.108698	-0.993763
Lrrc8a	782	4.54126e-06	1.53233e-05	0.16427	-0.0311409	0.141009	0.145299
Rapgef3	782	0.0006219	0.00159009	0.0477324	0.0521041	0.04228	0.0250417
Hs3st6	783	6.25015e-06	2.07592e-05	0.0724464	0.0424008	0.0947396	0.0876556
Supt4a	783	0.00117418	0.00289099	-0.358081	0.223551	-0.161553	-0.202963
Pcbp4	784	4.07807e-08	1.70072e-07	-0.0351082	0.138018	0.302831	0.150404
Plagl1	785	4.65998e-07	1.72532e-06	0.12815	0.110643	0.117406	0.0724601
Pdcd4	785	0.00119062	0.00292824	0.015747	0.187483	0.0853353	0.116248
Dusp14	786	0.00119989	0.00294885	-0.137747	0.139455	-0.176143	-0.254799
Sacs	787	4.4283e-08	1.83818e-07	0.0677868	-0.000229827	0.102752	0.0601884
Slc5a3	787	4.92109e-07	1.81746e-06	0.164904	0.128261	0.132405	0.102277
Wdr12	787	0.00120033	0.00294885	-0.496211	0.153064	-0.125091	-0.179522
Pls3	788	4.92956e-07	1.81908e-06	0.20224	-0.202593	0.0531987	0.13623
Spag1	788	0.00121253	0.0029739	0.0137681	0.0387229	0.00732071	0.0081281
Cd164l2	789	0.00121396	0.00297413	-0.0377822	0.0433908	-0.161367	-0.0514821
Lsm7	790	0.000322616	0.000857357	-0.505339	0.169693	0.150442	0.210982
Foxp4	790	0.00123009	0.0030087	-0.0244571	0.153951	-0.0531447	-0.12306
Tubb5	791	5.47414e-08	2.25132e-07	-0.860622	-0.0608284	0.52473	-0.186457
Ccnl1	791	5.11215e-07	1.87867e-06	0.324752	0.0413924	0.0841877	-0.318946
Sema7a	791	1.42341e-06	5.02365e-06	0.0982083	-0.293711	0.0992847	0.0846278
Abcb1b	792	1.25581e-06	4.46756e-06	0.0619754	0.0762791	0.0988118	0.0707475
Gjc1	793	1.60837e-06	5.66299e-06	0.0748973	-0.581718	0.109323	0.0838351
6030458C11Rik	793	0.00124038	0.00303052	-0.00921208	0.0995479	0.0623785	0.0334369
Jag1	794	5.99409e-08	2.45383e-07	0.0656977	-0.113753	0.190538	-0.0399281
Nop56	795	6.01447e-08	2.45991e-07	-0.470571	0.139228	0.368365	-0.0120464
Slc12a9	795	0.00120926	0.00296914	0.0689973	0.0900369	0.0814946	0.0477319
Nlgn2	796	6.08395e-08	2.48149e-07	0.105002	-0.0188493	0.156146	0.0694281
Il15ra	796	5.77146e-07	2.11399e-06	0.158352	-0.2493	0.109254	0.120762
Wdcp	796	5.9729e-07	2.18418e-06	-0.0240315	0.108725	0.123217	0.095494
Lrrc15	797	3.68683e-06	1.25544e-05	0.0848644	-0.755232	0.102374	0.0840156
Ccser2	798	1.81512e-06	6.37079e-06	0.19613	-0.0257725	0.132522	0.179645
Mpped2	798	0.000735755	0.00186079	0.0327053	0.0526155	0.0440459	0.0191626
Kmt2c	799	3.99466e-05	0.000119652	0.127943	0.136922	0.0439268	0.0965305
Tceal8	800	7.03774e-08	2.85224e-07	0.132999	-0.292244	0.338129	0.209546
Zkscan5	801	0.0013527	0.00328514	0.0304995	0.0564808	0.0358245	0.0147271
Col7a1	802	7.25613e-08	2.93807e-07	0.0581668	0.0514936	0.142214	-0.0222592
D10Wsu102e	802	0.000104812	0.000298867	0.0197082	0.151965	0.173985	0.0856456
Dot1l	803	6.79698e-07	2.47133e-06	0.171205	-0.0471108	0.078106	0.113136
Id1	803	0.000262837	0.00070993	0.237695	0.270533	0.223089	-0.0365911
Cdv3	806	8.35279e-08	3.36377e-07	-0.0387928	-0.256347	0.359869	0.102178
Ppp3ca	806	1.91713e-05	6.02604e-05	0.0393128	0.212871	0.233095	-0.132343
Rasa3	807	8.63893e-08	3.47273e-07	0.115015	-0.0191125	0.14713	0.0836994
Chil1	807	0.00149219	0.00361207	0.152941	0.176106	-0.373347	0.110982
Jmjd6	808	8.7678e-08	3.52135e-07	0.119143	0.0562287	0.276319	0.0575918
Syngr1	808	0.00151042	0.00365421	-0.07532	0.0834025	-0.141078	-0.00876264
Tnfrsf19	809	0.00152458	0.00368646	-0.0618165	0.0751877	0.0956451	0.0552913
Socs3	810	9.13202e-08	3.65832e-07	0.105113	-0.718096	0.36386	-0.369334
Slc39a1	810	8.27884e-07	2.99059e-06	0.206944	0.00851317	0.165745	0.154498
Plekho2	811	9.1417e-08	3.65832e-07	0.0910764	-0.0842424	0.120034	0.0683128
Plpp1	812	9.1417e-08	3.65832e-07	0.0595181	-0.143143	0.150318	-0.0406972
Fstl3	812	1.70052e-06	5.978e-06	0.117361	-0.127852	0.0956056	0.101034
Fbxl4	812	0.00155903	0.00375957	0.0461386	0.0630855	0.0123286	0.0328426
Zfp608	813	1.73091e-06	6.08003e-06	0.100001	0.0482389	0.0894147	0.0891368
Sorbs1	813	0.00156348	0.00376825	-0.0415671	0.114615	0.0855397	-0.0593934
Large2	814	0.00160315	0.0038597	-0.163881	0.0459448	-0.0991711	-0.260743
C1rb	815	9.72622e-08	3.88177e-07	0.0971268	-0.245776	0.119006	0.073824
Otud7b	815	9.21108e-07	3.31123e-06	0.170584	0.130819	0.0445209	0.0920011
Cdk17	815	2.58588e-05	7.97059e-05	0.107869	0.109145	0.110079	0.0998448
Ccdc85b	816	9.88297e-08	3.93728e-07	0.114455	0.110767	0.158328	0.0568096
Ppp1r9b	816	9.38787e-07	3.36934e-06	0.122183	0.0725385	0.106758	0.0891964
Enho	816	7.97956e-05	0.000231236	0.0639854	-0.0376652	0.0595557	0.0799477
Serpina3n	817	1.01856e-07	4.0506e-07	0.130617	-0.152812	0.28152	-0.526113
Smurf2	817	4.7275e-05	0.000140657	0.106126	0.0921515	0.0890318	0.10364
C1s1	818	6.72682e-07	2.44782e-06	0.124699	-0.728105	0.129027	0.00277195
Dcaf11	818	0.00163324	0.00392788	-0.0628315	0.0969068	-0.130948	-0.0625243
Dbn1	819	1.07245e-07	4.24595e-07	0.100282	-0.468157	0.134697	0.0802657
Fam89a	819	0.00164883	0.00396147	-0.173221	0.0686657	0.0226459	-0.29528
Ankrd12	820	1.03704e-06	3.71301e-06	0.303722	0.190904	0.289611	-0.0696306
Ikbkb	820	0.00165891	0.00398317	0.0728389	0.153658	0.0284249	0.115712
Htra3	823	8.10188e-05	0.000234628	0.0867549	-0.398621	0.0904149	0.0780756
Lrig1	824	1.5938e-05	5.05253e-05	0.129377	0.0241565	0.120112	0.116755
Ephb4	824	0.00171442	0.00411203	-0.0149548	0.097237	0.0234303	-0.0895305
Ninl	826	0.001732	0.00415196	0.00351453	0.036708	-0.00213948	-0.0166646
Akr1b3	827	1.38845e-07	5.44861e-07	-0.620127	-0.146919	0.32793	0.0910173
Cycs	827	3.39799e-07	1.27935e-06	-0.314594	0.276578	0.372668	0.18847
Cp	827	1.40842e-06	4.97665e-06	0.330589	0.227339	-0.524275	-0.154334
Lhfp	828	1.40263e-07	5.49939e-07	0.204039	-0.88605	0.288306	0.0454543
Nrd1	828	0.000693164	0.00176018	0.0736847	-0.0204008	0.0526178	0.161129
Myef2	829	0.00179885	0.00429833	-0.0858735	0.0871824	0.0409044	0.0039053
Slbp	830	1.50667e-07	5.89694e-07	-0.10453	0.193003	0.326511	-0.0761333
Arl5c	830	4.46267e-05	0.000133044	0.0678892	-0.00482975	0.0936693	0.0787721
Ckmt1	830	0.00182191	0.00435109	-0.32379	0.0561477	-0.600184	-0.2632
Slc16a7	831	0.00182353	0.00435263	0.0158272	0.0327667	0.0254664	0.0195757
Tubb2b	832	1.54941e-07	6.05888e-07	0.279092	-0.192155	0.361622	0.187466
Ndufa12	832	0.000728917	0.00184466	-0.447071	-0.335288	0.039866	0.252529
Ahcyl2	832	0.00182569	0.00435544	0.0382734	0.153394	0.0518268	0.000477099
Dram1	833	1.58496e-07	6.19246e-07	0.0980309	-0.0346146	0.140408	0.0794524
Tdrkh	833	0.000743575	0.00187748	-0.0294962	0.0278673	-0.0304325	0.0486167
Ccdc68	833	0.00183052	0.00436463	0.0470745	0.0764329	-0.0977375	0.0241907
Vezf1	834	8.43555e-06	2.76264e-05	0.126225	0.181565	0.196091	0.103582
Hdac4	835	1.73768e-07	6.74182e-07	0.117517	0.149333	0.195417	0.0305748
Ppp1r2	837	0.000749169	0.00189054	0.141887	-0.263797	-0.340639	0.232187
Bcl2l14	837	0.00189905	0.0045232	-0.0854445	0.0525183	-0.277855	-0.0492833
Zwint	838	0.000775056	0.00194924	0.0916721	0.0762548	0.100212	0.18562
Unc5c	840	5.21448e-07	1.91312e-06	0.0882719	0.0532122	0.109117	0.0808251
Unc93b1	840	2.03384e-06	7.10488e-06	0.151461	0.0395484	0.0528989	0.116169
Csn1s1	840	0.00195171	0.00464364	-0.168867	0.200704	-0.299415	0.0279382
Zfp865	841	0.0007855	0.00197439	0.0239665	0.0452122	0.0522782	0.0710279
Zfp451	842	2.20897e-06	7.69857e-06	0.200569	-0.0454522	0.19476	0.0557252
Tet3	842	0.000236825	0.000642009	0.142363	0.169636	0.161693	0.0638261
Bmp1	843	1.99307e-07	7.66593e-07	0.0953621	-0.820724	0.194322	0.0518015
Pvt1	843	0.000405273	0.00106278	0.0193575	0.0259071	0.10141	0.0944816
2200002D01Rik	844	2.33358e-06	8.10747e-06	0.139618	-0.00693642	-0.14525	0.114622
Muc15	844	0.00209899	0.00498607	-0.0751095	0.0431809	-0.238239	0.0169814
Tipin	846	2.92385e-06	1.00796e-05	-0.226999	0.0475394	0.141413	0.103713
Rnf217	847	7.2176e-07	2.61147e-06	0.0764426	-0.0811188	0.139823	0.0831156
Plekhm2	847	2.79812e-06	9.67612e-06	0.150173	-0.0172529	0.0847996	0.0635212
Asprv1	847	0.00218394	0.00517535	-0.0166711	0.036146	-0.241442	-0.102188
Bche	848	0.000898287	0.00223893	0.0426006	0.0412709	0.0334596	0.0455146
Ank3	848	0.00218706	0.00517871	-0.0330487	0.0396033	-0.140817	-0.040829
Syde2	849	1.33482e-06	4.74107e-06	0.0751951	0.0838983	0.107227	0.0571929
Sostdc1	850	0.00225831	0.00533607	-0.670625	0.101699	-0.196493	-0.546541
Dennd6a	851	0.000941714	0.00234324	0.0460455	-0.00172394	0.0155317	0.0661374
Ankrd11	852	2.52497e-07	9.61263e-07	-0.0134492	0.0993051	0.292397	0.0782454
Zfp655	852	2.97914e-06	1.02385e-05	0.1959	0.148901	0.144413	0.0663108
Lyar	853	0.00230558	0.00544199	-0.743001	0.211768	0.131882	0.0790564
Smoc2	856	3.22098e-06	1.10356e-05	0.121568	-0.29791	0.113453	0.0993447
Rel	856	0.000118636	0.000336135	0.150798	0.172974	0.0675538	0.0358364
Sec11c	856	0.00099743	0.0024791	-0.216584	0.00794593	-0.183222	0.193067
Ctnnb1	857	0.00101613	0.00252278	-0.00882435	0.0652117	-0.057323	0.242361
Myh14	857	0.0023442	0.00552436	-0.0299568	0.0441601	-0.303683	-0.0353448
Spon2	858	3.1173e-07	1.17565e-06	0.11699	-0.629332	0.139607	0.0874079
Ank2	858	3.47805e-06	1.18798e-05	0.0681954	-0.20645	0.0981223	0.0725503
Mark3	858	0.000862074	0.0021547	0.153363	0.186231	0.0918363	0.116119
Svil	859	0.000138606	0.000389742	0.181856	0.191129	-0.0244524	0.178387
Gm10260	860	0.00265996	0.00623222	-0.817084	0.277684	-0.610955	-0.680315
Cars2	861	0.00271352	0.00635104	-0.059593	0.0948018	-0.00726057	0.0198699
Irf8	862	1.18945e-05	3.82237e-05	0.163254	-0.237235	0.161626	0.135789
Foxq1	862	0.00272446	0.00637329	-0.0918585	0.0437696	-0.220643	-0.0484722
Kdm5b	863	0.00280915	0.00655076	0.0835275	0.172661	-0.145961	-0.190615
Thy1	864	2.96148e-06	1.01857e-05	0.0848478	-1.14223	0.111347	0.0859865
Mgme1	864	0.00281873	0.00656622	-0.0284332	0.0599803	0.0406323	0.0377369
Polrmt	866	0.00118718	0.00292139	0.000578206	0.0516505	0.016683	0.0586681
Fnip1	867	4.62265e-06	1.55626e-05	0.17573	-0.171533	0.104303	0.0750173
Plekhg6	867	0.00286006	0.00665902	-0.000952752	0.0279069	-0.0744158	-0.0587488
Kat2b	868	0.0012115	0.00297302	0.0387499	0.00371248	-0.0063917	0.0682461
Ncoa7	868	0.00286778	0.0066735	0.00445358	0.117865	-0.0436524	0.0581507
Rab8b	869	4.22618e-07	1.57386e-06	0.144569	-0.0178706	0.181706	0.0421687
Dcbld2	869	7.55812e-05	0.000220025	0.0667379	-0.316297	0.0729089	0.0644558
Zfp185	869	0.00288994	0.00671455	-0.00346543	0.0378596	-0.0127296	0.0063291
Uap1	870	4.78831e-06	1.60959e-05	0.296236	-0.711369	0.203714	-0.00445957
Dram2	870	0.00125475	0.00306396	0.0391399	-0.0407117	-0.0401718	0.0849433
0610040J01Rik	870	0.0028949	0.00672256	-0.184175	0.0406917	-0.216012	-0.00388228
Trp53i13	871	4.80852e-07	1.77883e-06	0.0994331	0.0801315	0.193733	0.0923985
6430573F11Rik	871	0.00290154	0.00673448	0.0182354	0.0392169	0.0135075	0.015564
Cdt1	872	3.486e-06	1.18978e-05	-0.225715	0.117024	0.144047	0.0614145
Tmem97	872	4.96532e-05	0.000147241	-0.409225	-0.056373	0.146088	0.107876
Tgfb1i1	873	5.14877e-07	1.89057e-06	0.110206	-0.180417	0.138173	-0.0322382
Ptcra	873	0.00287292	0.00668198	-0.0717009	0.0800585	0.073898	-0.00362447
Myo6	874	5.14558e-06	1.72319e-05	0.127311	-0.00173386	-0.0726246	0.0512848
Zcchc7	874	0.00130415	0.00317415	0.120079	0.120409	-0.0286464	0.140689
Ndrg1	874	0.00298931	0.00693458	-0.252122	0.227359	-0.511863	-0.731281
Adamts12	876	0.00016939	0.000469777	0.0603454	-0.424301	0.0743517	0.0648565
Pdxk	876	0.00305103	0.00707039	0.00786938	0.0948235	0.012044	-0.0622717
Ly96	877	0.000158221	0.000441552	0.111647	-0.0695828	0.00682831	0.109675
Tubgcp5	877	0.00311679	0.00721527	-0.0834642	0.0473191	-0.0672285	-0.0326775
Gca	878	0.00174147	0.00417015	0.0238386	0.0443359	0.000467052	0.0324354
Cdc42bpa	879	6.1056e-06	2.03246e-05	0.119691	-0.100463	0.0414998	0.0174397
Mex3b	879	0.000184261	0.000508804	0.0515259	0.0677204	0.0697682	0.0112737
Pqlc1	880	6.11796e-06	2.03506e-05	0.229119	-0.800524	0.132928	-0.395625
Mars2	880	0.00320444	0.00740663	-0.00580488	0.0890176	0.072837	0.00238259
Med13	881	6.48081e-06	2.14773e-05	0.164754	0.0365803	0.129014	0.0361358
Apobec3	881	0.00322037	0.00743187	-0.100062	0.0728443	-0.0728525	-0.0562581
Tmem86a	882	3.69565e-06	1.25748e-05	0.0853018	0.0741324	0.089981	0.0690632
S100a14	883	0.00334235	0.00769344	-1.12128	0.124606	-0.90197	-1.10183
Gas2l3	884	0.00153395	0.00370711	0.0217309	-0.0111379	0.0473574	0.0557851
4932422M17Rik	884	0.00338044	0.0077771	-0.0237556	0.0537521	0.0194956	-0.021592
Svep1	885	9.59294e-05	0.000275303	0.0459611	-0.461796	0.0563361	0.0487966
Mum1l1	885	0.000182795	0.000505066	0.0542621	0.0572928	0.0433273	0.0408875
Mtcl1	886	8.69744e-07	3.13671e-06	0.0708729	-0.0388697	0.0960492	0.00494069
Asrgl1	886	0.00342301	0.00787097	-0.152904	0.109972	-0.122847	0.0599522
Tnfsf9	887	8.79192e-07	3.16822e-06	0.0252255	-0.277463	0.176632	-0.0686292
Phb	887	0.00154725	0.00373457	-0.448136	0.0640931	0.191192	0.173297
Nhsl1	887	0.00343101	0.0078853	-0.143416	0.100626	0.0104599	-0.150507
Qser1	888	0.00355019	0.00815081	0.0267758	0.124876	0.0656409	0.0947445
Nucb2	889	0.00126642	0.00309076	0.115311	-0.0773824	0.0823297	0.134179
Slpi	889	0.00357955	0.00821398	-0.286039	0.332043	-1.24057	-1.56647
Arhgap17	890	8.72997e-06	2.85277e-05	0.13977	-0.159013	0.145081	0.114271
Mrps6	890	0.00364661	0.00836355	0.0538902	0.227582	0.0880282	0.130087
Msi1	891	9.72412e-07	3.48722e-06	0.059947	0.0675033	0.0945126	0.0502449
Gpx3	891	0.00162076	0.00389999	0.0681549	-0.372646	-0.0217407	0.0898339
Sorl1	891	0.003658	0.00838102	-0.0256526	0.0316924	-0.09766	-0.0336299
St3gal1	892	2.81105e-06	9.71328e-06	0.127389	0.0798298	0.144814	0.0124515
AC127341.3	893	0.00368517	0.00843893	-0.0807826	0.0571045	-0.0915404	-0.0723692
Il10rb	894	0.00173494	0.00415675	0.0572256	-0.0939621	0.0362759	0.0803395
Art3	895	1.15526e-06	4.12302e-06	0.0574488	-0.312172	0.157459	0.0903018
Iffo2	896	0.00393993	0.0089946	-0.00988413	0.118055	-0.0872881	-0.185049
Egr2	898	1.24336e-06	4.42678e-06	0.0768826	0.0771869	0.206073	-0.0676079
Tmem150a	898	1.07721e-05	3.4843e-05	0.106877	-0.207623	0.0636384	0.07131
Gramd1b	899	2.5079e-05	7.74096e-05	0.056041	0.0604224	0.0813664	0.0590118
Ifi203	902	1.37678e-05	4.40846e-05	0.143156	-0.833098	-0.192497	0.118724
Zfp157	902	0.00422596	0.00962291	0.0459874	0.0703081	0.0422643	0.0281079
Ppt1	903	8.20251e-06	2.69226e-05	0.196727	-0.113964	0.214276	0.153797
Ephb6	903	0.00423734	0.0096439	0.0283107	0.0730272	0.0346053	-0.0021788
Tmem45a	904	3.91349e-06	1.32754e-05	0.0799151	-0.341119	0.0912836	0.0487442
Ankrd33b	904	0.0042875	0.00975307	0.00649303	0.034471	-0.0258845	0.014453
Prdx4	905	8.77328e-05	0.000253248	-0.112398	-0.667746	0.313698	0.232016
Pcsk5	906	1.46685e-06	5.16879e-06	0.0870295	-0.4132	0.104442	0.0403398
Txnip	906	0.00447996	0.0101805	0.117161	0.189148	-0.000144236	-0.041875
Mgll	908	1.61827e-06	5.69335e-06	0.136153	-0.177899	0.210402	0.0646439
Ctbp2	908	0.0045371	0.0102946	-0.0664043	0.138822	0.0552443	0.0470648
B4galt5	909	0.000444185	0.00115764	0.0819767	-0.381192	0.0877769	0.0771584
2610035D17Rik	909	0.00466507	0.0105688	-0.0371007	0.0824743	-0.024773	-0.0316761
Nol7	910	0.00472024	0.0106883	-0.637564	0.197619	-0.164818	-0.0234594
Spen	911	0.00473407	0.0107142	0.0103876	0.103894	0.0147238	0.00905587
Usp47	912	1.70465e-05	5.3924e-05	0.170624	0.00323765	0.14437	0.0102228
Scml4	912	2.20142e-05	6.83285e-05	0.0851571	-0.0297438	0.0614943	0.0674157
Sssca1	913	0.00495309	0.0111701	-0.874626	0.161083	-0.123001	-0.245982
Nr4a2	914	2.07284e-06	7.22979e-06	0.207928	0.169	0.285541	-0.0551354
Ctdspl	914	0.000647691	0.001654	0.0585949	-0.200845	0.0731311	0.0732855
Nr4a3	915	1.86009e-05	5.8633e-05	0.144064	-0.359215	0.144928	0.0564312
Shroom1	915	0.00508775	0.0114449	-0.00312957	0.0284617	-0.0299907	-0.00179924
Spon1	916	1.53681e-05	4.88924e-05	0.117411	-1.48401	0.138835	0.106425
Gfpt1	916	3.98125e-05	0.00011933	0.181775	0.169274	0.184462	0.0557713
Plin3	917	0.0050995	0.0114655	-0.0769556	0.151908	-0.0779124	0.00890722
Mpv17	918	0.00233645	0.00550904	0.0567132	-0.0508966	0.0637591	0.0797383
Fam46a	919	2.49612e-06	8.6654e-06	0.106309	-0.590861	0.128225	0.0554856
Arg2	919	0.00529032	0.0118687	-0.033334	0.0304425	-0.112947	-0.0584911
H2afz	920	2.4983e-06	8.66622e-06	-1.24459	-0.131456	0.375981	0.0711853
Bmp2	920	1.0022e-05	3.25087e-05	0.0733071	-0.133344	0.0803924	0.0370481
Gm20696	920	0.00529615	0.0118717	0.0233964	0.0489745	0.00376668	0.0237842
BC028528	921	2.04713e-05	6.40304e-05	0.0958603	-0.491467	0.0974515	0.0531376
Slc1a4	921	0.00244171	0.00573898	0.0439551	0.0261277	0.0190059	0.055096
Lipe	921	0.00533918	0.0119561	0.018528	0.0461129	-0.03806	-0.029507
Anpep	922	0.0012235	0.00299587	0.0709644	-0.0747449	-0.0133166	0.0741353
Vegfc	923	8.57397e-06	2.80385e-05	0.0646612	-0.0445563	0.0867479	0.0528053
Stim2	923	2.09547e-05	6.54963e-05	0.135249	0.111248	0.124772	0.0788672
Lmbr1l	923	0.000222605	0.000607153	0.0841145	0.0834488	0.0154869	0.0368949
Traf5	924	2.65009e-06	9.17845e-06	0.0762619	0.0212977	0.0921328	0.0692546
Enpp5	924	0.00553754	0.0123816	0.000213073	0.0734839	-0.171202	-0.0405053
Junb	925	2.14292e-05	6.67451e-05	0.36163	0.0910233	0.0468638	-0.248793
Zc3h7b	925	0.00257523	0.00603689	-0.00367243	-0.0176291	0.0726438	0.0832609
2510002D24Rik	925	0.00555067	0.0124048	-0.168974	0.0712309	-0.136442	-0.0798687
Wwc2	926	2.16103e-05	6.72624e-05	0.191253	0.155756	0.189536	0.119761
Ell2	926	7.82428e-05	0.000227179	0.134671	-0.112585	-0.031623	0.122154
Ddx18	926	0.00560295	0.012509	-0.558284	0.157752	-0.0502408	-0.123009
Atp1a2	927	2.19973e-05	6.83236e-05	0.145934	0.0803431	0.120258	0.00407861
Flywch2	927	0.00563182	0.0125609	-0.121773	0.0899222	-0.00120225	-0.0911992
Slc41a3	928	0.000307247	0.000818585	0.0623759	-0.0357645	0.0584158	0.0581932
Gcnt1	928	0.00571117	0.0127251	-0.19779	0.0644928	-0.0527731	-0.117601
Lrrc8c	929	2.93744e-06	1.01108e-05	0.0927444	0.0777645	0.156015	0.00864082
Slco2a1	929	2.20528e-05	6.84006e-05	0.192994	-0.457351	0.057968	-0.122866
Selenbp1	929	0.00274565	0.00641276	0.0491059	0.0387465	-0.0390556	0.0704467
Mmp19	930	0.000102441	0.000292294	0.0774428	-0.873631	0.0813851	0.0698214
Phlda2	930	0.00576303	0.0128279	-0.124955	0.0653425	-0.110639	-0.113326
Map3k14	931	0.00214263	0.00508431	0.0798254	0.0780614	0.0482191	0.047706
Arhgef10	931	0.00287916	0.006693	0.0476094	0.0433229	0.0306867	0.056637
Tmem158	932	3.35101e-06	1.14547e-05	-0.0254221	-0.00925367	0.166119	-0.116229
Usp1	932	0.00591893	0.0131683	-0.489316	0.106046	0.0108709	-0.0886194
Osbpl8	933	2.53557e-05	7.82092e-05	0.11312	-0.0379199	0.119202	0.0632792
Pacrg	933	0.00600451	0.0133387	0.0159649	0.0326616	-0.0110158	-0.0132173
Ccdc157	934	0.000825244	0.00206845	0.0493587	0.054919	0.0544438	0.031388
Chpt1	934	0.00304437	0.00705862	0.0348577	0.00598907	-0.102397	0.0936049
Prkx	935	2.59407e-05	7.99031e-05	0.140781	-0.0280987	0.0379389	0.0386399
Klf11	935	0.00331235	0.00762835	0.0628101	0.093741	0.0690489	-0.0335113
Gtf2ird2	936	0.00609135	0.0135249	0.0208223	0.0361599	0.0132785	0.024554
Msn	937	3.60621e-06	1.22987e-05	0.209182	-0.604053	0.31953	-0.12806
Tmem246	937	0.00114383	0.00281939	0.0485996	0.0418629	0.0277731	0.0527327
Map7	939	0.00620269	0.0137447	-0.181081	0.0592935	-0.49683	-0.233821
March3	940	1.37588e-05	4.40846e-05	0.085423	0.06697	0.0972936	0.0618377
Ier2	941	3.80224e-06	1.29177e-05	0.102948	0.16364	0.358984	-0.0578168
Ttll7	941	0.00631329	0.0139689	0.00400282	0.052298	-0.043604	-0.00858653
Lama5	942	0.0064245	0.0141739	-0.0783111	0.0804841	-0.14099	-0.133628
H2afx	944	4.16115e-06	1.41048e-05	-0.435717	-0.0735315	0.207229	0.0381542
Fbxo9	944	0.00328363	0.00757001	0.0917406	0.0215159	0.0937166	0.115317
Ica1	944	0.0064447	0.0142102	-0.0111	0.0456189	-0.0655544	0.0154049
Tbc1d10a	945	2.99597e-05	9.12727e-05	0.195149	0.104834	0.21014	0.139003
Clmn	945	0.00653908	0.0144041	-0.247972	0.0632275	-0.284929	-0.196755
Cpne2	946	4.25356e-06	1.43962e-05	0.0969433	-0.0206377	0.1215	0.0521274
Pa2g4	946	0.00659212	0.0145066	-0.805077	0.228376	0.0703392	-0.00367253
Camk2g	947	4.37691e-06	1.47912e-05	0.0817513	0.101106	0.157063	0.0523884
Il17ra	947	3.31927e-05	0.000100503	0.139295	-0.337095	0.129159	0.0372078
Tenm4	947	0.00330836	0.00762308	0.0285081	0.0684033	0.0404696	0.0665099
Msi2	950	0.00697615	0.0153138	-0.0673126	0.0976528	-0.0161678	-0.074196
Serinc3	951	3.49678e-05	0.000105591	0.160472	-0.265833	-0.152799	0.108718
B3galt6	951	0.00400332	0.00912996	0.00261879	0.085116	0.0871664	0.0761225
Tpm2	952	4.9094e-06	1.64781e-05	-0.233852	-1.42559	0.266972	-0.661193
Col17a1	952	0.00719466	0.0157547	-0.175816	0.0291818	-0.0157422	-0.414111
Pdxp	953	0.000648007	0.001654	-0.0556913	0.0767868	0.0869036	-0.0474321
Polr2f	954	0.00749223	0.0163982	-0.811773	0.22838	0.0122306	0.202446
Tgif2	955	5.32445e-06	1.78175e-05	-0.00459995	0.0791661	0.13244	-0.0706663
Bace2	955	4.26351e-05	0.000127192	0.126411	-0.282798	-0.0218223	0.106609
Nipal2	957	0.00762796	0.0166871	-0.125391	0.0803143	-0.399372	-0.153522
Tmtc2	958	3.99886e-05	0.000119697	0.0787493	0.0527647	0.068222	0.0658185
Ston1	958	0.00763664	0.0166979	0.0264503	0.0490098	0.0311731	0.0367572
Prmt1	959	6.00176e-06	1.99939e-05	-0.715936	0.125686	0.328024	0.149421
Kank4	959	0.000105694	0.000300999	0.0764022	0.052742	0.0667605	0.0630564
Wfdc2	959	0.0076852	0.0167793	-1.34939	0.163408	-2.46389	-1.17023
Rftn1	960	0.00429595	0.00976732	0.0654067	-0.118278	-0.00191102	0.0759857
Tyms	961	0.000500255	0.00129468	-0.598452	0.0567195	0.120663	0.101081
Lad1	961	0.00771074	0.0168269	-0.485034	0.0734775	-0.608557	-0.540704
Arhgap28	962	0.00775687	0.016911	0.0312178	0.0731064	0.0374195	-0.00143157
Cyp2j6	963	6.2641e-06	2.07901e-05	0.07112	0.0445993	0.155927	-0.0317181
Gria3	963	3.76151e-05	0.000113125	0.0647404	-0.346845	0.0753472	0.0584936
Prlr	963	0.00776335	0.0169168	-0.0845202	0.0378936	-0.335831	-0.0299972
Ttyh2	964	6.41553e-06	2.12768e-05	0.0890842	-0.117449	0.118136	0.0749854
Tlr4	964	0.00402275	0.00916956	0.0306962	0.0161326	-0.00920344	0.0329513
Ptges	964	0.00777409	0.0169237	0.126483	0.148863	-0.201202	-0.110301
Kitl	965	6.50104e-06	2.15183e-05	0.0355059	0.134559	0.242094	-0.135859
Prmt2	965	0.00464688	0.0105329	0.0688184	0.0499022	0.0346986	0.0924619
Amd2	965	0.00778816	0.016946	-0.0359407	0.0506685	0.0123763	-0.0135518
Micu3	966	6.52669e-06	2.15812e-05	0.0755654	0.0464009	0.0972915	0.0679013
Cstf3	966	0.00782657	0.0170213	0.0543854	0.13279	0.080654	-0.013901
Mtmr3	968	5.14091e-05	0.000152245	0.112286	0.0768081	0.0834137	0.0882797
Plet1	968	0.00801856	0.0174218	-0.440963	0.227418	-2.25774	-0.817044
Sept10	969	7.31283e-06	2.40912e-05	0.0448419	0.0257874	0.109907	0.0672922
Il6st	969	4.89704e-05	0.00014541	0.147546	-0.50847	0.126905	0.11337
Dtymk	969	0.00827083	0.0179436	-1.33388	0.190333	0.105996	0.0017389
Ranbp1	970	0.00489304	0.0110459	-0.955755	-0.304693	0.0803984	0.19466
Uhrf2	971	7.47364e-06	2.46028e-05	0.155615	0.161048	0.220371	0.0992173
Nos1ap	971	0.00489868	0.0110531	0.0799448	0.0603922	0.00994992	0.071074
Casd1	972	0.000416875	0.00108965	0.0236145	0.0862919	0.0985656	0.0455673
Rrm2b	973	0.00844831	0.0182664	-0.124463	0.0999627	0.0595846	-0.0504316
Os9	974	5.12069e-05	0.000151747	0.174698	-0.280338	-0.00768777	0.0668958
Gm14005	974	0.00176904	0.00423163	0.166081	-0.297169	0.0860984	0.12234
Sumo3	975	0.000113192	0.000321323	-0.3716	0.131723	0.24503	0.174961
Nrbp2	975	0.00851034	0.0183916	0.0101037	0.0656186	-0.054605	-0.00273146
Abl1	976	0.00274041	0.00640723	0.0367386	0.0649465	0.092331	0.0873955
Grtp1	976	0.00864243	0.0186318	-0.0102424	0.0293599	-0.0312404	0.00780821
Cpt1c	977	5.2213e-05	0.00015442	0.0734072	0.0223139	0.0683012	0.0377489
Srsf7	977	0.000307079	0.000818585	-0.23596	0.226953	0.278297	-0.137336
Arhgef6	977	0.00552646	0.0123631	0.0323954	0.0305123	-0.0262155	0.0472666
Gm28875	978	0.0038386	0.00877676	0.0349199	-0.0216829	0.0423858	0.0421365
Gm11361	978	0.00868752	0.0187109	-0.690662	0.241717	-0.288919	-0.37621
Rassf10	979	0.0087562	0.0188497	-0.0083739	0.035556	-0.018743	-0.0376003
Vegfa	980	5.57757e-05	0.000164738	0.158992	-0.00539702	0.129002	-0.0550358
Dcun1d4	980	0.00166081	0.00398559	0.0439452	0.0770247	0.0768421	0.025311
Igsf9	981	0.00906383	0.0194649	-0.07452	0.0298083	-0.1072	-0.0651193
Fxyd6	982	0.00600314	0.0133387	0.0359906	-0.142503	-0.0189053	0.0607306
Itpkc	982	0.00909186	0.0195157	0.0810273	0.110271	-0.0851529	-0.136153
Lifr	983	1.09631e-05	3.53838e-05	0.0617233	-0.047711	0.081932	-0.0279218
Irs2	983	6.00801e-05	0.000176865	0.131054	-0.0672876	0.0808292	-0.0207113
Herc2	983	0.00614093	0.0136282	0.0345201	-0.052174	0.044999	0.0946288
Rnf128	983	0.00912943	0.0195869	-0.0217607	0.052482	-0.0398978	-0.0749506
Adcy7	984	1.16805e-05	3.75632e-05	0.0789984	-0.00899435	0.0926152	0.0446194
Ppp6r3	984	0.00527917	0.0118515	0.0457947	0.123809	0.0956161	0.0103285
Afap1	986	6.21694e-05	0.000182774	0.129668	-0.0416834	0.0377083	0.034467
Cask	986	0.0063643	0.0140702	0.0681003	-0.0891964	0.0396839	0.0906486
Ralgps2	986	0.00935125	0.0200527	-0.0924414	0.0632244	-0.0456645	-0.13875
Selenon	987	0.00636539	0.0140702	0.0557115	-0.20416	0.0331172	0.0605805
Ccdc6	987	0.00477244	0.0107956	0.0455705	0.0975196	0.079021	0.0476957
Coro1c	988	0.00638247	0.014094	0.0408395	0.0613883	0.110953	0.116533
Moxd1	988	0.00960944	0.020587	-0.140933	0.0596788	0.0306491	-0.316964
Col18a1	989	1.34473e-05	4.31206e-05	-0.0387267	-0.910084	0.179573	-0.093882
Pik3c2b	990	0.00968841	0.0207462	0.0124836	0.0286643	-0.021082	0.0154473
Hook3	991	7.00218e-05	0.000204913	0.197447	0.0253483	0.143092	0.00308784
B3glct	991	0.000392346	0.00103098	0.0613809	-0.192847	0.0782461	0.0754658
Tiam2	991	0.00975835	0.0208759	0.0460554	0.072792	0.0475062	-0.0122591
Frmd4a	992	1.3836e-05	4.42711e-05	0.106105	-0.193097	0.192585	0.089245
Pak6	992	0.00982462	0.0209975	-0.0513336	0.0425532	-0.017125	-0.0873432
Egfl7	993	1.38582e-05	4.43106e-05	-0.0311229	-0.0657216	0.0868453	0.0312974
Esyt1	993	0.000129902	0.000366655	0.108961	-0.126454	0.0986072	0.105803
Igsf3	993	0.0098433	0.0210186	0.094663	0.202389	0.0247995	-0.23976
Impact	994	1.42102e-05	4.53707e-05	0.0476797	-0.179006	0.14543	0.0795252
Stox2	994	0.00984391	0.0210186	-0.00399398	0.10097	-0.00996047	-0.0420975
Ankrd44	995	7.2682e-05	0.000211862	0.0795642	0.0128337	0.0729982	0.0620045
Cd14	996	0.00986096	0.0210449	-0.231755	0.16023	-1.18448	-0.260875
Smad7	998	7.51317e-05	0.00021886	0.181577	-0.135572	0.0201283	-0.100878
Agmo	998	0.00252854	0.00593056	0.0561851	-0.142705	0.0507941	0.0542954
Smyd2	998	0.0100415	0.0213994	-0.171559	0.143099	0.117147	0.0131311
Sdc1	1000	1.56112e-05	4.95596e-05	0.0494455	-0.793946	0.302559	-0.325212
Trim28	1000	0.00529217	0.0118687	-0.358182	0.175819	0.159823	-0.0202812
Gba	1001	7.7546e-05	0.00022545	0.126385	-0.0150113	0.0918987	0.0987601
Tmem51os1	1001	0.0107979	0.0229237	0.0150418	0.0223514	-0.000623369	0.0138812
C1qtnf1	1002	0.00815716	0.0177056	0.0122089	-0.13418	-0.0075424	0.0362853
Fbxo25	1002	0.0108831	0.0230775	-0.000335612	0.054467	0.0161839	-0.00365921
Als2cl	1003	0.0108859	0.0230775	0.0108527	0.0288729	-0.0460694	0.0206436
Slc25a25	1004	7.91507e-05	0.000229517	0.128926	0.0205485	0.020574	-0.00753509
Ptpru	1004	0.0109111	0.02312	0.00263103	0.0289594	-0.0033064	-0.0264068
Nptn	1005	3.72522e-05	0.000112129	0.142401	-0.420102	0.153725	0.11459
Nhp2	1005	0.0110365	0.0233634	-1.11091	0.260762	-0.0269549	-0.0426333
Gna13	1006	8.12138e-05	0.000234887	0.197991	-0.128578	0.180203	0.0928508
Mpzl1	1006	0.00836471	0.0181208	0.0611513	0.0924369	0.0238227	0.170371
Pank1	1006	0.0110841	0.023453	-0.0257236	0.0464315	0.0019872	0.0322997
Mtmr10	1007	8.86784e-05	0.000255646	0.0779114	-0.00925555	0.0641822	0.0336339
Nqo2	1007	0.00837547	0.0181353	0.0343274	-0.104032	0.0521961	0.0559492
Bmp7	1007	0.0111168	0.0235111	-0.401565	0.0827523	0.0613379	-0.24723
Fam13a	1008	0.0111517	0.0235736	0.0430009	0.0697881	0.0109599	0.0292186
Nedd9	1009	8.97837e-05	0.000258665	0.149422	0.0635784	-0.0536357	-0.0670224
Fubp1	1010	1.70027e-05	5.38239e-05	0.0903187	0.178889	0.285426	0.165086
Cntfr	1010	0.0111906	0.0236335	-0.0719866	0.0602883	0.0264861	-0.396203
Sbf2	1011	9.65577e-05	0.000276749	0.109204	-0.060958	0.0719304	0.0689975
Aig1	1011	0.00876997	0.0188703	0.156148	0.167475	0.127284	0.174271
Baiap2l1	1011	0.0112212	0.0236869	0.0130958	0.065549	-0.0337305	-0.0361393
Cblb	1012	9.91444e-05	0.000283615	0.104723	-0.208836	0.0725898	0.0557109
Dek	1013	1.74952e-05	5.52649e-05	-0.876838	0.144928	0.27643	0.133086
Ypel3	1013	9.93692e-05	0.000284076	0.157264	-0.344984	-0.0677186	-0.0395748
2310033P09Rik	1013	0.0112392	0.0237136	-0.14955	0.0977626	-0.0673726	-0.0934039
Ccl17	1014	0.00010012	0.000286038	0.0591858	0.0241131	0.0361013	0.0355095
Sfrp2	1014	0.00463076	0.0105017	0.0685699	-0.057765	0.0690401	0.0718154
Setdb1	1014	0.0112873	0.0237975	-0.0661714	0.0854429	-0.0999555	-0.0107791
Slc16a1	1015	1.81252e-05	5.71824e-05	-0.0161206	-0.0252942	0.151941	-0.188082
Ppl	1015	0.0112896	0.0237975	-0.102495	0.0351198	-0.235624	-0.168018
Arhgap29	1016	0.000191662	0.00052793	0.0708786	-0.315819	0.0593685	0.0624051
Atxn1	1017	1.93744e-05	6.08557e-05	0.112911	0.0483226	0.140458	-0.0400102
Vsig10	1017	0.011437	0.0240887	0.00907085	0.077979	-0.160911	0.0373117
Nr2f1	1018	2.04282e-05	6.39405e-05	0.0521424	-0.106669	0.0633769	0.0429796
Foxo1	1018	0.0114386	0.0240887	-0.153641	0.116317	-0.0672011	-0.202221
3110079O15Rik	1020	0.0115639	0.024341	-2.00099	0.272281	-1.92926	-2.35063
Nolc1	1021	2.22848e-05	6.90719e-05	-0.496913	0.202071	0.293948	-0.0713583
Ifnar2	1021	0.0062289	0.0137959	0.119575	-0.334347	0.0503608	0.119564
Rorc	1021	0.0116033	0.0244124	-0.0521389	0.0391084	-0.245939	-0.142835
Rell1	1022	2.4152e-05	7.46515e-05	-0.00628777	0.137168	0.182473	0.00432121
Ccl7	1022	0.000108949	0.000310071	0.146997	-0.509097	0.122937	0.0974071
Ppox	1022	0.0116505	0.0245002	-0.0188398	0.0679361	-0.0523075	-0.0455785
Cybrd1	1023	0.00699942	0.0153574	0.000492761	0.0466015	0.052216	0.0385647
Neo1	1024	2.94447e-05	8.98882e-05	0.102033	0.0930219	0.135323	0.0841255
Pcf11	1024	0.000110325	0.000313784	0.171676	0.0808329	0.132709	0.00810052
Egr1	1024	0.011684	0.024559	0.0644204	0.306217	0.0103094	-0.353273
Pcbd2	1025	0.00996604	0.021259	-0.187412	-0.418921	-0.0884498	0.10732
2310001H17Rik	1025	0.0117036	0.0245887	-0.0375361	0.0525634	-0.072103	-0.0117968
Grb14	1026	0.0117631	0.0246903	0.00908317	0.0482681	0.00649013	-0.0332261
Mertk	1027	0.00123975	0.00303052	0.0522584	0.0359278	0.0626663	0.0477299
Jph1	1027	0.00245947	0.00577768	0.0525103	0.0561293	0.0573234	0.0323563
Nptx2	1028	0.000165245	0.0004591	0.0213076	-0.00239405	0.0711224	0.0426108
Tchh	1028	0.0118833	0.0249308	0.0310758	0.0367602	0.00218604	0.00539491
C4b	1029	0.000127435	0.000360836	0.114083	-0.0245013	-0.040731	0.0260911
Nfat5	1030	0.000127726	0.00036143	0.1793	-0.0529613	0.124836	-0.0388885
Ablim1	1030	0.0119855	0.0251334	0.0466137	0.0715993	0.0484869	0.0429223
Rrm2	1031	3.06819e-05	9.33451e-05	-0.461135	0.0398754	0.0961214	-0.00781788
Gm26917	1031	0.0120622	0.0252673	-0.149	0.199054	-0.804748	-0.0136252
1190002N15Rik	1032	3.13226e-05	9.52294e-05	0.0647183	-0.124001	0.105813	0.032292
Hip1r	1032	0.0120663	0.0252673	-0.0501021	0.0521855	-0.174293	-0.0776075
Pgf	1033	0.000132707	0.0003741	0.155796	-0.139497	0.0960706	0.0562429
Ccdc13	1033	0.0120817	0.0252776	0.0220725	0.0265774	0.0150272	0.0114392
Nfe2l3	1034	0.0120883	0.0252776	-0.190158	0.030224	-0.394142	-0.167168
Fgfr3	1035	0.00319617	0.00739136	0.0495951	0.0671697	0.0703825	0.033219
Sdc3	1036	3.31818e-05	0.000100503	0.10428	-0.0949562	0.145991	0.0360836
Phactr1	1036	0.0117196	0.0246106	0.0297179	0.033741	0.0370835	0.061313
Pnp	1038	3.47782e-05	0.00010509	0.00934303	-0.373762	0.19601	0.0553548
Ly6d	1038	0.0123925	0.0258772	-1.23016	0.168446	-2.32505	-1.89601
Ipmk	1039	3.53203e-05	0.000106583	0.0738227	-0.0945793	0.118076	0.00957077
Col4a6	1039	0.0124026	0.0258861	-0.0381032	0.0306311	-0.077576	-0.134807
Tpx2	1040	0.0120845	0.0252776	-0.353757	0.0180939	0.0403818	0.0507066
Synrg	1040	0.0124431	0.0259586	-0.01149	0.053696	-0.0278178	-0.0269074
Gal	1041	3.62489e-05	0.000109311	0.0647295	0.0511154	0.0978714	0.0343902
Srgap2	1041	4.85565e-05	0.000144373	0.103908	0.0548425	0.144074	0.108816
Hs3st1	1041	0.012473	0.0260088	0.0140917	0.0669799	0.0385256	0.010758
Serpina3f	1042	0.00281552	0.00656218	0.0402618	-0.0468968	0.0450331	0.0408601
Ssc4d	1042	0.0126903	0.0264372	-0.0187281	0.0351825	-0.00835924	-0.0474416
Atp13a2	1043	0.012799	0.0266387	-0.0523947	0.0521957	-0.0911428	-0.0985853
Mical1	1045	3.72588e-05	0.000112129	0.0341757	0.0131858	0.0886904	0.0248439
Ggt1	1045	0.0130342	0.0270776	0.0220791	0.0433105	-0.0215842	-0.0021574
Ppp1r15a	1046	0.000156124	0.000436793	0.223555	-0.386509	-0.198878	-0.192825
Tpk1	1046	0.0132066	0.0274101	0.000542307	0.0398931	-0.0175521	0.01375
Ppp1r12c	1047	3.78811e-05	0.000113771	0.0618748	-0.00271808	0.148971	0.0482976
Xpr1	1047	0.000156329	0.000437014	0.135981	0.0836928	0.0374752	-0.0338859
Brat1	1047	0.0132342	0.0274547	-0.00154956	0.0305185	0.0014766	-0.00215122
Hif1a	1048	3.8866e-05	0.000116572	-0.0396514	-0.325426	0.207055	-0.252611
Rnf11	1048	0.000156399	0.000437014	0.149113	-0.307666	0.0274597	-0.01904
Arhgap26	1048	0.0125848	0.0262296	0.0341466	0.0238064	-0.00789853	0.0262668
Cpsf1	1050	0.013359	0.0277007	-0.115802	0.0629741	-0.0316573	0.00197315
Tex36	1051	0.0135531	0.02809	-0.042075	0.0286367	0.0275633	-0.0415897
Slc6a15	1053	0.0136667	0.0283123	-0.0255544	0.0367758	0.0405345	0.0117153
Vstm4	1054	0.000465145	0.00120872	0.03966	-0.355273	0.0603749	0.0454361
Lonrf1	1054	0.013751	0.0284738	0.00149887	0.0782193	-0.0141681	-0.04708
Simc1	1056	0.000173926	0.00048146	0.0859786	0.031267	0.0814615	0.0358639
Lcorl	1056	0.0140874	0.0291433	0.0119917	0.0825053	0.00346913	0.0256123
Cep85l	1058	0.000162204	0.000451254	0.0856474	0.0137938	0.0920481	0.0686483
Tyrobp	1058	0.0143464	0.029658	0.0686376	0.10774	0.0743534	0.0652123
Prss22	1059	0.0143496	0.029658	-0.0484412	0.0331193	-0.158973	-0.404241
Sh2b2	1060	5.49034e-05	0.000162269	0.0277669	0.03039	0.0846839	-0.0559668
Sprtn	1060	0.0138609	0.0286879	0.0267661	0.0349937	0.0305879	0.0488731
Stat2	1062	0.000184874	0.000510178	0.0758753	-0.206905	-0.0216288	0.00609731
Dpysl2	1062	0.00059296	0.00152134	0.0725224	-0.309346	0.0997641	0.0816306
Zfp825	1062	0.0146975	0.0303348	-0.0410222	0.0272781	0.00484212	0.00435155
Slc12a4	1063	5.79068e-05	0.000170806	0.0226171	-0.107041	0.0981551	0.0172854
Lag3	1063	7.81462e-05	0.000227047	0.0581242	-0.00283748	0.0686758	0.0135234
Ndufa10	1063	0.0148379	0.0306082	-1.07383	0.177744	-0.377913	-0.509356
Atp2c1	1064	0.000186985	0.000515367	0.126952	-0.20967	0.0249148	0.0561818
1700023F06Rik	1064	0.014898	0.0306917	0.01447	0.0370816	0.00922657	-0.0311732
Hist2h4	1065	0.015181	0.0311883	0.00965333	0.033299	-0.0543439	0.0168498
2900060B14Rik	1067	0.0153032	0.0314103	-0.138313	0.0759912	-0.135077	-0.236968
Clec11a	1068	6.98355e-05	0.000204502	0.0195624	-0.969376	0.102799	-0.159232
Tbx3	1068	9.66468e-05	0.000276826	0.107438	0.0180393	0.10965	0.0439082
Angpt2	1068	0.0146598	0.030271	0.0193231	-0.248585	0.0220852	0.0346819
Ctsb	1069	7.11174e-05	0.000207846	-0.162038	-0.778179	0.310288	-0.436041
Adgrg6	1069	0.0150922	0.0310488	0.0341323	-0.0184778	0.0031551	0.0437338
Ubn2	1070	7.13131e-05	0.000208144	0.162261	0.0957372	0.218381	-0.0114981
Pvr	1070	0.000199657	0.000549272	0.159528	-0.0676375	0.0914634	0.114133
Fam178b	1070	0.0155443	0.0318906	-0.197337	0.0526148	0.00202547	0.00374919
Itga7	1071	0.000201379	0.000553327	0.0685172	-0.0676887	0.0625421	0.0496719
Dkc1	1071	0.0158686	0.032511	-0.545675	0.121188	0.0409217	-0.0490329
F3	1072	0.000202288	0.000555481	0.207521	0.0646489	-0.34374	0.122122
Plekha6	1072	0.0155556	0.031899	0.0182121	-0.0731446	-0.07175	0.035508
2810006K23Rik	1072	0.0161433	0.0330282	-0.00443394	0.0571108	0.0254579	0.0314528
Emilin2	1073	7.62109e-05	0.000221714	0.058052	-0.356112	0.064159	0.0476256
D930016D06Rik	1073	0.0162724	0.0332464	0.0300635	0.0617732	0.0251651	0.00711018
Herc4	1074	0.000206708	0.000567269	0.129069	0.0357529	0.0923933	0.0508638
Suco	1074	0.00136892	0.0033209	0.128884	0.138747	0.00449536	0.0498347
Mansc1	1075	0.0165436	0.0337695	-0.10899	0.0463032	-0.259821	-0.0883976
Csrnp1	1076	0.000211731	0.000579982	0.162218	-0.0641371	-0.0100062	-0.0875412
Pla2g16	1076	0.01621	0.0331494	0.0612032	-0.378365	-0.322569	0.126672
Xylt1	1077	7.90685e-05	0.000229427	0.0713109	-0.0657138	0.105207	0.0105052
Ptprf	1077	0.0168682	0.0343849	-0.186772	0.103492	-0.407104	-0.256576
Schip1	1078	0.00021652	0.000592736	0.0937917	0.0457462	0.0902714	0.0145862
Gamt	1078	0.00681212	0.0149759	0.07948	-0.199295	0.097849	0.0947155
Chd2	1078	0.0171543	0.0348882	0.0487473	0.135679	0.0573904	-0.0230533
Ccng2	1079	0.0172332	0.0350168	-0.00836891	0.123915	0.0727485	-0.115701
Rhbdf2	1081	0.000227201	0.000618554	0.0981509	-0.0223613	0.00652138	0.0385841
Fbxw5	1081	0.0165849	0.0338384	-0.0218567	-0.00324607	-0.00131694	0.049542
Slc12a7	1081	0.0175145	0.0355234	0.0215936	0.0377233	0.00516152	0.000800913
Il1rl1	1082	0.0165949	0.0338432	0.0149396	-0.176427	0.0207785	0.025735
2810454H06Rik	1082	0.0178268	0.0361241	-0.0140656	0.0444594	-0.0363098	0.0121901
Fermt1	1083	0.0180081	0.0364416	-0.315073	0.0518959	-0.258327	-0.317332
Diaph2	1084	0.000236457	0.0006414	0.0915124	-0.0679992	0.0849201	0.0639971
Fblim1	1084	0.000394223	0.0010353	0.119782	0.12002	0.0982492	0.0767427
Dpt	1084	0.00559248	0.0124919	0.0587942	-0.162158	0.0631467	0.0577055
Ppfibp2	1085	0.0128631	0.0267597	0.0756747	0.0908417	0.0242643	0.0173453
Zfp36l1	1086	8.8102e-05	0.000254149	0.177308	0.222427	0.265735	-0.397527
Nuak1	1086	0.000222564	0.000607153	0.0714019	-0.0138215	0.0743735	0.046447
Reg3g	1086	0.0169409	0.0344858	0.0372722	0.0207342	0.0281013	0.044765
Chst2	1087	9.00954e-05	0.000259396	0.0929962	-0.0151735	0.122146	0.0757483
Tma16	1087	0.0185939	0.0375418	-0.450547	0.133297	-0.00220954	-0.10855
Atxn7l1	1088	0.0173764	0.0352915	0.0435864	0.00981218	0.0206529	0.0550184
Slc8b1	1088	0.0186287	0.037595	0.0230947	0.0486536	-0.0853579	0.0347581
Tubb4b	1089	9.0694e-05	0.000260782	0.0165343	0.22561	0.29827	-0.119298
Rbm5	1090	0.000259746	0.000702434	0.192886	0.117236	0.145921	0.0802438
Rnf152	1090	0.00881049	0.0189483	0.0187925	0.0161064	0.0253207	0.0272887
5730559C18Rik	1090	0.0187173	0.0377396	-0.154124	0.0594037	-0.13215	-0.235073
Gngt2	1091	0.0164885	0.0336725	0.0296341	-0.155207	0.0419013	0.0458267
Gmcl1	1091	0.0188287	0.0379298	-0.0151486	0.0886058	0.0637833	-0.00593209
Cplx2	1092	0.000293691	0.000786591	0.0527786	0.032959	0.0401267	0.0428447
Etnk2	1092	0.0104855	0.0223136	0.0253362	0.0296191	0.00134632	0.0122403
Pdzk1ip1	1093	0.0189837	0.0382248	-0.0248477	0.0323187	-0.347415	-0.00124066
Tjp2	1094	0.0190195	0.0382624	-0.125358	0.0826113	-0.341394	-0.0803332
Tmod3	1095	0.00026779	0.000721558	0.148241	-0.272498	0.00944907	0.111885
[truncated: 2,455 more rows]

## Sheet: 3-Fibroblast EMT
	Top	p.value	FDR	logFC.1	logFC.2	logFC.4	logFC.5
Sparc	1	1.539e-293	6.85469e-290	4.66674	1.89696	5.10759	3.57137
Igfbp7	1	1.05846e-264	1.57146e-261	5.17814	3.38284	5.56946	4.64585
Vim	2	8.45005e-265	1.57146e-261	2.25061	0.518685	3.98299	2.35332
Bgn	2	3.90857e-229	4.35219e-226	4.5872	1.71685	4.76716	4.10248
Adamts2	2	2.57676e-87	2.94279e-85	2.21352	2.05232	2.23046	2.21702
Pla1a	3	2.71706e-77	2.52121e-75	1.96017	1.93985	1.95224	1.97436
Cd63	4	6.71316e-158	4.27149e-155	2.30968	0.110787	1.92328	1.45892
Col3a1	4	1.43649e-138	6.39814e-136	4.38462	1.48887	4.47361	4.24476
Tmsb4x	4	6.48119e-90	7.59663e-88	2.19135	2.11202	1.79961	2.2558
Serpinh1	5	1.1193e-199	9.97071e-197	2.27039	0.673593	3.20804	1.97036
Pcolce	5	3.65028e-158	2.70973e-155	3.07427	0.177985	3.29438	2.816
Timp1	5	1.00384e-121	2.79444e-119	3.49907	2.72948	3.79733	3.23134
Col1a2	6	1.23377e-126	4.22709e-124	4.45509	2.14987	4.52238	4.33573
Pdlim1	6	1.19772e-73	1.00654e-71	1.53039	1.84608	1.52821	1.72783
Lgals1	7	2.20668e-156	1.22857e-153	1.83186	1.19171	3.35602	2.19027
Col6a1	7	6.96647e-125	2.06858e-122	3.29895	2.03752	3.27386	3.28552
Ifitm2	8	1.40315e-143	6.94405e-141	1.88368	0.84812	2.16285	1.94017
Col6a2	8	3.4881e-118	8.17685e-116	3.0986	2.07002	3.10032	3.1535
H2-D1	8	9.4685e-73	7.53084e-71	1.01077	2.15484	-0.0665447	0.715822
Col1a1	9	3.6634e-116	7.7699e-114	4.40769	2.80393	4.36617	4.3447
Col5a3	9	1.4423e-77	1.36681e-75	1.9508	1.81458	1.969	1.94836
Ppic	10	2.65364e-138	1.07448e-135	2.27299	1.31389	2.85527	2.18817
Ebf1	10	3.24064e-118	8.01877e-116	2.71927	1.24103	2.78137	2.58235
Lpl	10	1.35795e-73	1.12006e-71	2.43082	2.31483	2.46648	2.47274
Col4a1	11	3.55177e-135	1.3183e-132	2.82678	0.45722	3.33927	2.67278
Timp2	11	9.57118e-121	2.50765e-118	2.46992	0.490802	1.90176	1.98909
Col6a3	11	1.01444e-113	2.05378e-111	3.28698	2.24716	3.31449	3.25298
Col5a2	12	1.50245e-116	3.34597e-114	3.0013	1.2714	3.12579	2.84654
Loxl2	12	8.21805e-67	5.01414e-65	1.52714	1.55596	1.58005	1.56212
Col4a2	13	4.81615e-126	1.53222e-123	2.90042	0.806789	3.44385	2.6131
Serpinf1	13	8.90762e-113	1.72498e-110	3.29269	1.52521	3.54132	3.23237
Mfap5	13	7.94995e-66	4.72121e-64	2.92425	2.90301	2.96418	2.94965
Cd81	14	4.61307e-111	7.90254e-109	2.07638	1.25715	1.69349	2.12727
Col15a1	15	8.2366e-78	7.97518e-76	2.10495	1.86602	2.17297	2.1159
Ctsk	16	2.0074e-105	2.88418e-103	2.6968	1.72007	2.75543	2.68219
Fstl1	17	1.11911e-104	1.55766e-102	2.61294	1.56052	2.64385	2.59067
Serpine2	19	4.90334e-82	5.19987e-80	1.83868	2.44961	3.15694	1.52609
Rcn3	20	3.62671e-111	6.46135e-109	2.38	1.60508	2.76557	2.0654
Adamts4	21	3.11711e-77	2.83339e-75	2.17129	1.69821	2.2322	2.00854
Ppib	22	5.34015e-112	9.91044e-110	1.63983	1.11859	2.06354	1.74663
Cald1	22	4.75426e-108	7.30188e-106	1.99589	0.965574	1.7815	1.92318
Mt1	22	4.25871e-52	1.56763e-50	0.45925	1.79375	1.51883	-0.126735
Npc2	24	2.96503e-51	1.04811e-49	1.2339	1.4472	1.33277	1.21913
Tuba1a	25	1.18575e-108	1.95605e-106	1.96805	-0.371836	2.52115	1.32478
Laptm4a	25	2.89023e-104	3.90093e-102	2.10077	0.536616	1.95442	1.89023
Tnfaip6	25	2.06451e-71	1.55853e-69	2.21277	1.80226	2.24991	2.15526
Mgp	26	1.47789e-108	2.3509e-106	1.48445	-0.462444	3.32972	1.74369
Lgals3bp	26	2.24455e-50	7.63146e-49	1.09598	1.24891	0.821878	1.08453
Emp3	27	1.66074e-105	2.46565e-103	1.87465	0.423145	2.33169	1.3923
Cygb	27	3.60252e-65	2.05713e-63	1.86223	1.57391	1.85342	1.80642
Acta2	28	3.49075e-63	1.87323e-61	2.1313	2.04754	2.40383	1.62773
Malat1	29	6.67242e-97	8.03215e-95	2.69947	0.653584	0.853836	1.02734
Htra1	29	1.10423e-66	6.64626e-65	1.50191	1.35541	1.62544	1.35671
Gsn	30	4.38539e-103	5.74486e-101	2.40396	1.60768	2.59082	1.81615
Serping1	30	2.44821e-51	8.72345e-50	1.96813	1.88894	1.98127	1.95933
Selenom	31	2.75281e-97	3.50315e-95	1.75876	0.305391	2.04385	1.39674
Mmp14	32	5.72409e-97	7.08197e-95	1.94505	0.897284	2.1532	1.89423
Pdgfrb	32	5.7266e-84	6.37656e-82	2.00676	1.29319	2.01635	1.9
Nbl1	32	6.48611e-67	4.01238e-65	1.50895	1.24134	1.45487	1.36575
Ifitm1	33	8.55037e-49	2.73981e-47	1.49514	1.49172	1.52723	1.51243
Fbn1	34	5.48495e-79	5.68138e-77	1.95313	1.47574	2.08245	1.92484
Aebp1	36	1.33156e-82	1.44653e-80	1.95222	0.711691	2.21877	1.73107
B2m	37	2.73385e-55	1.11712e-53	1.46987	1.36345	0.432382	0.982491
Fn1	38	5.73015e-78	5.67157e-76	2.75209	1.53563	2.67155	2.52841
Ccdc80	38	2.48451e-69	1.72906e-67	1.8299	1.41086	1.81834	1.80587
Gpx8	39	3.68596e-78	3.73119e-76	1.4129	1.18723	1.61416	1.3062
Hexa	40	1.44973e-76	1.29142e-74	1.72342	1.14673	1.66713	1.6114
S100a6	40	2.00637e-45	5.91813e-44	0.856948	1.21335	1.41037	1.04089
Gng11	41	1.40429e-72	1.09732e-70	2.35764	1.59881	2.43378	2.34113
Spon1	41	3.41705e-52	1.2683e-50	1.62242	1.48401	1.64749	1.60751
Selenof	42	7.07531e-69	4.84822e-67	1.02237	0.702863	1.53426	1.62959
Rarres2	43	1.48031e-55	6.16196e-54	1.67182	1.46359	1.66055	1.68489
Lrp1	44	4.05573e-76	3.54201e-74	1.86672	0.621709	1.88866	1.65545
Tpm2	44	5.21227e-59	2.41828e-57	1.22993	1.42559	1.70298	0.756151
F2r	45	2.94545e-65	1.70377e-63	1.6156	1.29103	1.67417	1.61609
Fcgrt	46	9.42635e-76	8.07403e-74	1.67862	0.761904	1.60465	1.5278
Ifi202b	46	1.46194e-45	4.34099e-44	1.20016	1.15564	0.831939	1.18617
Npdc1	47	6.63064e-42	1.78987e-40	0.868042	1.08734	0.619696	0.805418
Mmp2	48	4.87708e-73	3.94955e-71	1.98583	1.32088	2.04093	1.82337
Ramp1	48	1.425e-41	3.80056e-40	0.863866	1.32979	1.22049	0.553518
Cst3	49	3.06458e-71	2.27494e-69	1.9144	-1.87011	1.64844	1.15701
Nid1	50	1.67829e-68	1.11569e-66	1.57858	0.775525	1.59089	1.53105
C1qtnf6	50	9.9468e-68	6.32901e-66	1.5154	1.14352	1.57675	1.44514
H2-K1	51	3.44652e-40	8.67277e-39	0.387171	1.39018	-0.406356	0.266123
Anxa1	52	1.4283e-63	7.95207e-62	1.61618	1.46069	0.253506	2.04397
Ecm1	52	1.51661e-44	4.38634e-43	1.32662	1.28497	0.912635	0.926872
Mfap2	53	5.92922e-72	4.55324e-70	2.047	0.316124	2.20663	1.94473
Anxa5	54	1.5637e-69	1.12334e-67	1.61422	1.05013	1.5971	1.39402
Hspa1a	54	9.61974e-40	2.35419e-38	1.33405	1.99633	0.905936	0.812931
Xist	55	2.11887e-69	1.49801e-67	1.99977	-0.0309158	0.980138	1.27615
Fxyd1	56	5.2727e-62	2.6094e-60	1.44532	1.11374	1.47408	1.45462
Dcn	57	1.14561e-70	8.3648e-69	2.83099	1.1648	2.89174	2.53918
Ifitm3	57	9.71436e-69	6.55572e-67	1.61833	1.14286	1.70943	1.31695
Cd302	57	3.38892e-68	2.21975e-66	1.51153	0.877644	1.59359	1.46831
Thy1	57	4.11862e-46	1.24791e-44	1.24449	1.14223	1.27172	1.24163
Nupr1	58	1.42943e-65	8.37721e-64	2.22473	1.68427	1.08955	2.18664
Tagln	58	5.59742e-54	2.20628e-52	1.99106	1.66551	2.01723	1.69471
Marcks	60	1.85514e-63	1.0201e-61	1.46216	0.380288	1.60474	1.55984
Ifi27	60	2.9793e-37	6.66825e-36	0.545415	1.16478	0.77612	0.219498
Sh3bgrl3	61	4.63139e-68	2.9896e-66	1.34498	1.24862	1.781	1.59462
Lgmn	62	5.286e-41	1.39313e-39	1.06677	1.0964	1.12601	1.06052
Serpine1	63	6.03413e-67	3.78535e-65	2.20004	1.62211	2.2762	1.82787
Col5a1	63	6.79093e-63	3.51707e-61	1.54793	1.1249	1.57135	1.50146
Ndufa4l2	64	1.18734e-39	2.88985e-38	1.58732	1.51377	1.60588	1.57509
Crlf1	66	5.26018e-53	1.98549e-51	1.66245	1.54527	1.95612	1.62685
Lum	67	4.69797e-53	1.78844e-51	2.07966	1.66109	2.0834	2.08349
Lama2	68	3.06134e-59	1.43529e-57	1.55325	0.692615	1.58002	1.52976
Loxl1	69	6.03494e-57	2.63526e-55	1.53665	1.03677	1.54705	1.5221
S100a11	69	2.10478e-35	4.3807e-34	0.903189	1.05913	0.218901	0.736452
Lamb1	71	1.359e-64	7.66201e-63	1.36567	0.534455	1.58673	1.25178
Fxyd5	71	9.21959e-51	3.15877e-49	1.33702	1.12224	1.31238	1.33604
Timp3	72	1.64735e-62	8.43366e-61	2.08088	0.897401	1.75397	1.76974
S1pr3	72	2.27999e-58	1.02577e-56	1.40241	0.970529	1.42566	1.35436
Gdpd3	72	8.13041e-39	1.90594e-37	1.21407	1.16136	1.18284	1.20946
Col8a1	73	1.21685e-54	4.88276e-53	1.99755	1.50924	1.98168	2.00143
Efemp2	74	3.25665e-63	1.76892e-61	1.46131	0.715386	1.55758	1.35134
Cndp2	74	1.16632e-34	2.38293e-33	0.794334	0.859574	0.834947	0.837982
Pmp22	75	1.03971e-60	5.08887e-59	1.43591	0.224672	1.43889	1.2042
Mt2	75	4.55978e-34	8.98639e-33	-0.339111	1.57273	1.02623	-0.411881
Manf	76	3.96727e-63	2.1036e-61	1.12417	0.745197	1.47943	1.1907
Clec11a	76	1.46373e-41	3.88062e-40	0.994607	0.969376	1.0907	0.801547
Plat	77	4.10184e-63	2.14936e-61	1.5806	0.720179	1.6771	1.35931
Emp1	78	1.46862e-59	6.95875e-58	1.48156	-0.226465	1.18957	0.624561
Fkbp1a	80	2.73244e-62	1.38299e-60	0.622309	0.984942	1.4742	1.27086
Capg	80	1.52671e-32	2.80991e-31	0.00561055	1.12945	0.00593403	0.238859
P3h3	81	3.90083e-62	1.95217e-60	1.32972	0.568328	1.43741	1.23362
Postn	81	9.21386e-59	4.18761e-57	1.96384	1.49949	1.59614	0.405437
Plpp3	81	1.36534e-56	5.79165e-55	1.56719	1.14949	1.58987	1.45398
Cyb5a	82	1.32164e-33	2.54831e-32	0.837687	1.03655	0.594722	1.04838
Gpx7	84	3.34906e-60	1.62138e-58	1.02147	0.861934	1.42599	1.16303
Vasn	84	1.58766e-57	7.00142e-56	1.29108	0.436777	1.01032	1.01786
Cotl1	84	1.55987e-53	6.04143e-52	1.10787	1.09761	1.45488	1.06878
Oaf	85	8.87356e-60	4.24977e-58	0.975429	-0.322121	1.50483	0.620358
Fkbp7	85	5.47075e-58	2.43667e-56	1.21992	0.651558	1.33449	1.18348
Itgav	86	2.8152e-40	7.12437e-39	0.964224	0.843117	0.79401	0.907549
Colec12	87	2.83394e-50	9.4905e-49	1.22996	0.512826	1.26221	1.21639
Prrx1	88	7.00997e-59	3.21881e-57	1.20946	-0.0220409	1.3056	1.14347
Itgb5	88	8.73683e-48	2.74041e-46	1.22783	0.979291	1.19788	1.21001
Nenf	90	8.54592e-52	3.06964e-50	1.28091	0.825212	1.31408	1.30316
Cd248	91	7.87626e-48	2.48801e-46	1.17623	0.748221	1.18872	1.16503
Ifi204	91	4.55718e-33	8.56443e-32	0.80938	0.773444	0.740473	0.792282
Ccnd2	92	7.48077e-57	3.23489e-55	0.676108	-1.30796	1.5266	0.373132
Igfbp4	93	8.52199e-57	3.64971e-55	1.0706	0.241005	1.93467	1.03682
Wls	93	1.46581e-53	5.72693e-52	1.37999	0.65604	1.26452	1.21617
Rpl22l1	93	1.05174e-29	1.72223e-28	0.886144	1.0595	0.617715	0.821316
Cxcl14	95	6.34041e-56	2.66417e-54	2.35944	1.56711	2.5875	1.60928
Rnase4	95	5.09697e-46	1.53391e-44	1.33555	1.23771	1.5948	0.760982
Eva1b	97	1.99215e-55	8.21578e-54	1.19528	-0.326315	1.30316	0.955888
Lhfp	97	4.0395e-45	1.17594e-43	1.04681	0.88605	1.14503	0.915046
Ugdh	98	5.93284e-55	2.40226e-53	1.47066	0.38843	1.68487	0.916707
Tmem59	98	1.75888e-52	6.58325e-51	1.2826	0.335805	0.989674	0.876611
Mmp23	98	4.80206e-29	7.61153e-28	0.712923	0.733947	0.66093	0.658282
Rora	99	8.3818e-52	3.03517e-50	1.16479	0.230929	1.12445	1.00633
Igfbp6	99	1.27814e-32	2.36216e-31	1.06123	1.00488	1.06458	1.04607
Calu	100	5.30714e-54	2.11053e-52	1.04689	0.577569	1.30723	1.00828
Map1b	100	1.78002e-33	3.40266e-32	0.885055	0.808312	0.820264	0.826665
Copz2	101	1.28698e-49	4.21485e-48	1.1408	0.303157	1.04382	1.07779
Fcer1g	101	5.42733e-34	1.0649e-32	1.53881	1.42796	1.54365	1.54743
Flt1	102	3.15662e-29	5.0574e-28	0.832978	0.830112	0.797805	0.837246
S100b	103	8.52944e-33	1.58955e-31	0.875838	0.834076	0.900166	0.894225
Vkorc1	104	2.41777e-53	9.28341e-52	1.11681	0.863446	1.37698	1.06549
Hmox1	104	3.67363e-51	1.28837e-49	2.05114	0.727998	1.97835	1.19643
Il3ra	104	2.76228e-28	4.24248e-27	0.542049	0.584698	0.582558	0.552561
Col12a1	105	3.70789e-51	1.29023e-49	1.42522	0.724983	1.43583	1.26166
Mrc2	106	3.70589e-43	1.03812e-41	1.06887	0.682797	1.07895	1.05927
Mmp19	106	3.47973e-33	6.56726e-32	0.955557	0.873631	0.958651	0.947512
Metrnl	107	2.46917e-50	8.33157e-49	1.29287	0.303839	1.25125	1.16257
Mxra8	107	6.15338e-42	1.67117e-40	0.978023	0.586311	0.955389	0.996707
Tfpi	107	3.34163e-28	5.11465e-27	0.713536	0.707791	0.714553	0.718331
Itgb1	108	6.57693e-52	2.40112e-50	1.12651	0.468945	1.37199	0.954412
Rhoc	108	1.06054e-49	3.499e-48	1.27612	0.268529	0.499087	0.853016
Mxra7	108	3.92468e-42	1.07905e-40	0.964675	0.224501	0.972386	0.97918
Gm13889	108	1.08468e-31	1.93246e-30	1.52813	1.41026	1.51319	1.47797
Rhoj	109	3.76767e-50	1.25233e-48	1.05783	0.784579	1.25454	1.12813
Col18a1	109	1.83858e-36	3.97526e-35	0.861602	0.910084	1.07466	0.815522
Rrbp1	110	3.91214e-49	1.27187e-47	1.2177	0.440651	1.24405	0.933713
Aspn	110	2.81441e-43	7.9338e-42	1.54895	0.580963	1.5275	1.50323
Itih5	111	1.07837e-40	2.77635e-39	1.1813	0.673059	1.11351	1.19121
Hsp90b1	112	7.53264e-51	2.6008e-49	0.786319	0.623388	1.39455	1.14231
Eln	112	2.96588e-44	8.5226e-43	2.13748	1.31737	2.21339	2.08147
Crtap	113	1.06988e-42	2.97828e-41	0.910302	0.681868	0.988021	0.944394
Srpx2	113	3.10942e-34	6.18276e-33	0.762212	0.673003	0.762142	0.757824
Selenop	114	1.0634e-48	3.38313e-47	1.31228	0.0479996	0.974741	1.04622
Pdlim2	114	7.94271e-41	2.08099e-39	0.999522	0.686603	0.85919	1.00596
Lox	114	1.64709e-27	2.42137e-26	0.801497	0.78152	0.79448	0.767629
Bmp1	115	1.91696e-40	4.90698e-39	0.936632	0.820724	1.02291	0.880452
S100a4	116	8.18987e-49	2.64331e-47	1.23875	-0.0242077	2.10896	1.3531
Ccl2	116	5.31923e-39	1.26694e-37	2.03672	1.66904	2.05009	2.05017
Fosb	117	1.19499e-36	2.60907e-35	1.36471	1.17657	0.767388	0.713724
Scn1b	118	3.96313e-31	6.89522e-30	0.670513	0.604337	0.656641	0.606902
Clic4	119	3.14311e-46	9.58863e-45	1.12059	0.700262	1.00874	0.996072
Has1	119	1.22032e-35	2.55179e-34	1.32941	1.12008	1.34183	1.28779
Cavin3	120	2.00099e-47	6.23246e-46	0.683558	0.35623	1.27478	0.854378
Wisp1	122	2.862e-45	8.3864e-44	1.10044	0.212414	1.11536	1.02069
Ctsh	122	4.33669e-29	6.90491e-28	0.871284	0.854913	0.438586	0.9555
Pros1	123	7.34546e-39	1.73104e-37	0.840708	0.703883	0.910085	0.757981
Fkbp9	124	8.04314e-47	2.48779e-45	0.919972	0.406974	1.17117	0.92691
Akr1b8	124	8.02095e-24	9.68165e-23	0.0266393	0.516701	0.347883	0.262111
Slc29a1	125	6.02283e-37	1.33461e-35	0.893516	0.0781778	1.07171	1.1238
Gnai2	126	1.52951e-46	4.69825e-45	0.737822	0.242941	1.17253	0.843854
Prrx2	126	3.5143e-40	8.79364e-39	1.05678	0.231688	1.1124	1.05557
Tmem140	126	4.75241e-27	6.79304e-26	0.715819	0.663957	0.667461	0.697441
Ifi203	127	9.8955e-34	1.91629e-32	0.984782	0.833098	0.625391	0.951963
C1s1	128	1.72223e-32	3.15671e-31	0.853199	0.728105	0.864629	0.728455
Itm2c	130	1.27516e-45	3.81179e-44	0.958863	0.443629	1.20623	0.454758
Serpinb6a	130	3.77542e-34	7.47365e-33	0.749822	0.88653	1.04602	0.8125
Foxs1	131	4.58847e-42	1.25381e-40	1.01504	-0.362504	1.05833	0.966796
Cdc42ep2	131	2.66727e-24	3.28178e-23	0.586338	0.566785	0.587233	0.580083
Tspan6	133	6.88959e-40	1.70479e-38	1.02249	0.759876	1.0729	0.990016
Plin2	133	2.80904e-22	3.20807e-21	0.511198	0.742826	0.3509	0.641493
Sqstm1	134	8.76357e-41	2.26936e-39	1.21063	0.465931	0.2371	0.677889
Creb3l1	134	2.91803e-34	5.82821e-33	0.753735	0.608359	0.736145	0.749131
Akap13	136	2.92253e-39	6.99836e-38	1.00533	0.371616	0.896218	0.945217
Fam198b	136	1.11726e-24	1.40177e-23	0.494935	0.477406	0.505653	0.487664
Thbs2	137	3.64133e-40	9.0606e-39	1.13391	0.0480711	1.1391	1.05364
Tmed3	137	5.53293e-33	1.03545e-31	0.944542	0.842712	1.05226	0.999935
Cdh11	138	8.24382e-41	2.14725e-39	0.96455	0.325436	0.983008	0.886834
Srpx	138	5.23853e-35	1.08021e-33	0.88645	0.59339	0.905038	0.883279
Angptl2	138	7.44391e-31	1.26546e-29	0.751905	0.771742	0.904612	0.857314
Pdgfrl	139	1.30872e-43	3.73656e-42	1.08925	0.212387	1.30654	0.99446
Lamb2	139	5.29083e-36	1.12216e-34	0.932499	0.574522	0.800565	0.908474
Tppp3	139	3.46116e-28	5.27946e-27	0.947287	1.02985	1.17357	0.983121
Fkbp10	140	2.43424e-43	6.90579e-42	0.846101	0.466323	1.05067	0.903926
Shisa5	141	2.6251e-33	4.97541e-32	0.925459	0.757954	0.654208	0.85461
Cd79b	142	5.80627e-24	7.06588e-23	0.675021	0.654104	0.694317	0.676353
Col11a1	143	1.46523e-42	4.0535e-41	0.932073	0.117701	1.52217	0.919465
Ptgis	143	1.3975e-23	1.65986e-22	0.585441	0.556221	0.584352	0.549606
Myadm	144	7.88714e-22	8.80434e-21	0.560491	0.57373	0.497768	0.585143
Lrrc15	145	4.75849e-27	6.79304e-26	0.856151	0.755232	0.868919	0.848729
Selenow	147	8.38429e-42	2.24962e-40	0.685975	0.159366	1.24289	0.84925
Gfpt2	147	8.74236e-39	2.03866e-37	1.03884	0.401248	1.03881	0.958968
Ctsb	147	4.98055e-36	1.06141e-34	0.498183	0.778179	1.09952	0.296442
Ak1	149	7.83389e-40	1.92774e-38	0.869282	0.664571	0.931756	0.631059
Jak1	150	9.57847e-39	2.222e-37	1.03133	0.430759	0.983568	0.697059
Cdkn2a	151	6.34422e-20	6.57143e-19	-0.718695	0.888977	-0.0511501	-0.260252
Gem	152	1.35259e-39	3.27415e-38	1.09166	0.00754147	1.13184	0.784755
Adam12	152	4.88446e-23	5.72511e-22	0.501227	0.473467	0.513485	0.506953
Plxdc2	153	2.31565e-40	5.89367e-39	0.976709	0.618669	1.02186	0.778366
Sgce	153	1.45356e-34	2.95623e-33	0.728536	0.134151	0.764545	0.730476
Itga5	154	3.25617e-38	7.47576e-37	0.96147	0.192242	0.946163	0.838682
Gnb4	154	4.20157e-36	8.99702e-35	0.82279	0.695563	0.949326	0.892593
Rgs5	154	5.01715e-21	5.37172e-20	1.40142	1.35217	1.36786	1.35738
Tapbp	156	2.37691e-19	2.41156e-18	0.326763	0.64479	-0.154945	0.195673
Crip1	157	1.15539e-37	2.61225e-36	1.24134	0.505348	1.20128	1.21059
Aoc3	157	1.30598e-21	1.43981e-20	0.53911	0.514311	0.546476	0.541697
Slit3	158	1.87135e-24	2.32821e-23	0.54567	0.497862	0.561799	0.542733
Fbln2	159	1.38411e-39	3.33235e-38	0.943491	-1.41044	1.38669	0.570575
Gjc1	159	6.21983e-26	8.39489e-25	0.666014	0.581718	0.687116	0.666544
Ctsl	160	3.99893e-37	8.90561e-36	1.31758	0.537123	1.28043	0.190442
Plvap	160	1.90266e-34	3.85203e-33	0.849383	-0.0421633	0.825799	0.813529
Csrp2	161	6.02258e-39	1.42684e-37	0.939596	0.0860013	1.35367	1.04634
Itga1	161	1.7018e-28	2.65029e-27	0.666468	0.618672	0.773295	0.721814
Rasgrp2	162	6.61957e-25	8.4693e-24	0.597191	0.557209	0.63993	0.592576
Fbln5	163	2.42308e-35	5.01972e-34	0.885929	0.352343	0.955615	0.88777
Thbs1	164	1.13949e-36	2.50014e-35	1.28484	0.797562	0.782892	1.20304
Lama4	164	7.36174e-32	1.32215e-30	0.747745	0.17852	0.847572	0.835386
Pxdc1	165	1.31665e-38	3.03852e-37	0.823177	0.270934	1.10053	0.191866
Pqlc1	165	2.33363e-36	5.02126e-35	1.08399	0.800524	0.941387	0.412831
Klf9	166	1.77485e-36	3.85619e-35	1.02328	-0.314895	0.757071	0.538688
Il11ra1	166	5.75215e-34	1.12369e-32	0.980854	0.0975044	0.944002	0.935256
Fam46a	166	8.64868e-27	1.22679e-25	0.693598	0.590861	0.72282	0.651688
Prss23	167	5.66966e-38	1.29501e-36	1.06957	0.636234	1.14859	0.975585
Glipr2	167	5.20455e-31	8.91579e-30	0.712957	0.513627	0.701227	0.708415
Vcan	168	5.85272e-38	1.33e-36	0.259936	0.564325	1.09479	0.340456
Tpm4	169	5.72097e-30	9.43749e-29	0.878265	0.770337	1.0271	0.960064
Olfml3	171	1.3523e-37	3.04199e-36	1.56524	-0.0392485	1.63454	1.3039
Zeb2	172	2.13844e-34	4.30977e-33	0.793871	0.0991605	0.819125	0.759965
Ifi211	172	5.9874e-18	5.67401e-17	0.424314	0.431298	0.367438	0.43453
Olfml2b	173	1.13787e-26	1.58873e-25	0.576466	0.479843	0.566778	0.577775
Mical2	174	1.15795e-21	1.28297e-20	0.494514	0.459592	0.509208	0.416839
Nnmt	175	2.27016e-27	3.29357e-26	0.69249	0.558585	0.690908	0.67542
Gstm2	176	1.03067e-22	1.19547e-21	0.51925	0.467824	0.533903	0.508253
Axl	177	7.8761e-37	1.73664e-35	0.727782	0.345383	0.946796	0.627077
Col26a1	177	2.02773e-18	1.95487e-17	0.490154	0.473158	0.487202	0.491756
Dbn1	178	9.89375e-28	1.48373e-26	0.587451	0.468157	0.600587	0.562047
Spon2	179	1.95451e-26	2.69517e-25	0.766898	0.629332	0.785753	0.727609
Islr	180	1.90471e-30	3.21348e-29	0.695901	0.361993	0.712383	0.694776
Apold1	180	4.87824e-19	4.89362e-18	0.716822	0.673786	0.709958	0.69642
Il34	181	4.95643e-29	7.82835e-28	0.728115	0.395702	0.705188	0.727696
Ece1	181	1.24564e-21	1.37669e-20	0.643276	0.582685	0.597714	0.540803
Rcn1	182	6.88913e-36	1.45423e-34	0.559868	0.509494	1.00446	0.799902
Sdc1	182	2.64036e-31	4.62999e-30	0.853112	0.793946	1.1078	0.416939
Ckap4	183	1.19685e-35	2.51452e-34	0.778716	0.346106	0.98929	0.734169
Sat1	183	6.57313e-34	1.27846e-32	1.36798	0.839252	0.889585	1.2297
Ifngr2	183	3.87111e-28	5.88462e-27	0.722586	0.494726	0.628115	0.750353
Sparcl1	183	2.0323e-27	2.96782e-26	1.4819	1.16053	1.44681	1.4077
Iigp1	184	9.72449e-18	9.17646e-17	0.804636	0.770201	0.615082	0.774729
BC028528	185	7.00885e-26	9.43124e-25	0.599752	0.491467	0.598594	0.554843
Ncam1	186	2.90392e-29	4.66934e-28	0.66282	0.353875	0.690474	0.663703
Tbc1d2b	186	1.12285e-18	1.09916e-17	0.382365	0.358363	0.358725	0.368276
Tubb6	187	1.67137e-33	3.20875e-32	1.07956	0.0817162	1.03009	0.735094
Bicc1	187	4.4576e-28	6.75311e-27	0.598179	0.296801	0.614623	0.607134
Tnc	188	9.98332e-35	2.04911e-33	1.13788	0.760354	1.19325	1.01056
Gbp2	188	3.03501e-18	2.90084e-17	0.644847	0.600128	0.395709	0.581201
Actg2	189	7.93254e-16	6.70427e-15	0.444994	0.605933	0.584205	0.483508
Oaz2	190	2.6202e-27	3.77681e-26	0.796658	0.404909	0.809658	0.811642
Prr13	190	1.24501e-15	1.0365e-14	0.411571	0.613765	0.0941465	0.417641
Cavin1	191	2.26168e-34	4.53763e-33	0.675461	0.436041	0.804968	0.594444
Prdx4	193	2.03498e-28	3.15812e-27	0.592757	0.667746	0.944018	0.903273
Il6st	194	5.74427e-25	7.3732e-24	0.638073	0.50847	0.617793	0.615651
B4galt5	195	3.96958e-21	4.29138e-20	0.441801	0.381192	0.457125	0.447768
Dusp1	196	1.37308e-15	1.14099e-14	0.789336	0.8064	0.578325	0.0634529
Slc50a1	197	2.50977e-33	4.77714e-32	0.681034	0.104625	0.915916	0.783132
Adamts12	197	4.65059e-21	5.00331e-20	0.483781	0.424301	0.503164	0.494321
Fst	198	3.06568e-15	2.49626e-14	-0.564762	0.516866	0.49236	-0.88844
Gadd45b	199	5.22893e-32	9.42901e-31	1.36434	-0.225182	1.14245	0.643968
P4ha1	200	9.27418e-33	1.72113e-31	0.664535	-0.0884388	0.803476	0.390296
Tnfaip2	200	1.54074e-25	2.0485e-24	0.587445	0.511501	0.433987	0.710877
Tagln2	200	3.4816e-15	2.82975e-14	-0.0127736	0.767219	0.540988	0.0200901
Uap1	201	9.48167e-27	1.33643e-25	0.957923	0.711369	0.874662	0.651339
Crlf2	203	2.93642e-19	2.96572e-18	0.549134	0.501824	0.510266	0.479314
App	204	1.24359e-31	2.20675e-30	0.971108	0.268965	0.784972	0.716005
Maged2	205	2.73864e-31	4.7835e-30	0.807113	0.409353	0.898834	0.79326
Higd1b	205	2.11617e-16	1.86273e-15	0.762402	0.724554	0.755178	0.759262
Eif1b	206	2.29778e-32	4.19439e-31	0.58882	0.444155	0.858183	0.712283
Itgbl1	206	6.64573e-24	8.06542e-23	0.73897	0.586257	0.749974	0.732146
Tgfb1	207	2.7732e-32	5.04156e-31	0.73605	-0.236501	0.923971	0.509339
Cxcl1	207	4.70527e-31	8.09162e-30	1.80413	0.399997	1.54749	1.65829
Atp1b2	207	2.91524e-15	2.38685e-14	0.400765	0.393452	0.401374	0.380705
Myl9	208	2.96852e-32	5.37471e-31	0.776014	0.0857577	1.02983	0.439269
Basp1	209	2.02474e-14	1.58492e-13	-0.0695019	0.486793	-0.230384	0.147283
Arid5b	211	5.29794e-30	8.77213e-29	1.00003	-0.367663	0.768868	0.455611
Tuba1b	212	8.40636e-32	1.50369e-30	-0.485274	-0.1706	1.05612	0.675513
S100a13	212	6.89384e-30	1.13303e-28	0.980834	0.634741	0.800702	0.667802
Ednra	212	2.18066e-17	2.01927e-16	0.418801	0.379583	0.408923	0.414468
Bag3	213	1.14706e-29	1.8646e-28	0.868252	0.3694	0.792438	0.428979
Abcc9	213	2.36635e-14	1.833e-13	0.481201	0.476987	0.478502	0.473033
Sptbn1	214	1.30631e-31	2.30886e-30	0.637112	0.448768	0.891076	0.670388
Ikbip	215	1.96165e-31	3.45343e-30	0.673217	0.264254	0.736966	0.622002
Nfkb1	215	4.34076e-29	6.90491e-28	0.907971	0.413295	0.716163	0.735434
Lamc3	215	2.66275e-25	3.48821e-24	0.61214	0.256364	0.607752	0.604597
Neat1	217	5.73756e-29	9.03007e-28	1.21478	0.195616	0.821236	0.265055
Svep1	217	1.10505e-17	1.03619e-16	0.517126	0.461796	0.526856	0.516569
Mfge8	218	2.03216e-24	2.52124e-23	0.8965	0.0357731	-0.402754	0.979255
Il6	219	9.94319e-27	1.39267e-25	1.44475	0.957735	1.46401	1.39565
Slc25a4	220	4.3595e-31	7.55534e-30	-0.192329	0.234213	1.01385	0.389561
Sqor	220	2.42043e-17	2.22195e-16	0.347959	0.306983	0.275877	0.328803
Lamc1	221	4.41437e-31	7.62077e-30	0.550061	0.183172	0.829203	0.538298
Pianp	222	6.79273e-31	1.15919e-29	0.529196	0.291027	0.700772	0.418511
Pcdh19	222	1.41119e-24	1.76062e-23	0.47886	0.361396	0.492297	0.48483
Pcsk5	222	1.44027e-21	1.58394e-20	0.502433	0.4132	0.523058	0.472694
Serf1	223	1.4586e-16	1.29672e-15	0.456293	0.526839	0.599235	0.547212
Crispld2	224	9.5174e-31	1.61181e-29	0.862661	0.508652	0.921262	0.819625
Rap1b	224	2.34583e-28	3.62789e-27	0.843937	-0.271564	0.685856	0.499775
Lpp	224	1.09422e-19	1.12816e-18	0.539377	0.45638	0.436709	0.430158
Litaf	225	2.54235e-28	3.91821e-27	0.841742	-0.283575	0.640558	0.382883
Meg3	226	1.95155e-29	3.1608e-28	1.42887	0.496312	1.45643	1.22583
Kdelr3	227	2.10506e-30	3.53809e-29	0.575135	0.203203	0.765535	0.594026
Rgcc	227	4.59204e-28	6.9332e-27	1.18314	0.0667463	1.16583	0.963059
Epb41l2	227	8.95882e-24	1.07554e-22	0.551765	0.128	0.593258	0.607405
Ctsf	227	2.19417e-17	2.02756e-16	0.419726	0.366774	0.407903	0.348362
Socs3	228	2.18494e-30	3.65855e-29	0.862619	0.718096	1.11963	0.364198
Ddr2	228	3.92794e-25	5.08577e-24	0.580048	0.302557	0.605546	0.582131
Mndal	228	2.7839e-18	2.66655e-17	0.494239	0.426649	0.32299	0.479996
Snhg18	229	2.21372e-30	3.69285e-29	0.515194	0.142642	0.874398	0.476843
Filip1l	229	1.24604e-13	9.40655e-13	0.421179	0.420381	0.324959	0.414347
Plac8	230	1.09547e-13	8.31217e-13	0.623703	0.62146	0.560293	0.614622
Tspan4	231	3.98893e-30	6.62936e-29	0.671862	0.230478	0.848196	0.719819
Nfatc1	231	1.18406e-27	1.75793e-26	0.614861	0.252594	0.607106	0.533154
Csf1	231	3.70148e-25	4.82059e-24	0.758369	0.54096	0.700916	0.734396
Psme2	231	3.67064e-13	2.67141e-12	-0.445477	0.605884	-0.0837856	0.175555
Nipal1	232	3.24846e-24	3.98586e-23	0.656857	0.473917	0.52356	0.655104
Sntb2	234	1.11422e-29	1.81785e-28	0.727004	0.102316	0.854524	0.592182
Pttg1ip	234	1.62131e-27	2.39911e-26	0.755278	0.291922	0.444939	0.53088
Hk2	234	2.64597e-20	2.75999e-19	0.563503	0.544491	0.664217	0.37444
Fuca1	235	2.09107e-27	3.04367e-26	0.727805	0.397389	0.730483	0.705636
Dnajb4	235	8.59096e-21	9.08887e-20	0.708372	0.571649	0.701519	0.594784
Cyth3	237	2.61124e-29	4.21394e-28	0.736729	-0.68156	0.768303	0.605226
Rsrp1	237	2.012e-27	2.94785e-26	0.941747	0.322329	0.644244	0.558402
Hmgcs1	237	4.64468e-15	3.70742e-14	0.367163	0.430622	0.457203	0.392378
Emilin2	238	7.90716e-19	7.80898e-18	0.422908	0.356112	0.433078	0.408633
Adamtsl5	239	1.90302e-16	1.68176e-15	0.36098	0.31875	0.322401	0.347715
Cd109	240	9.06274e-29	1.42132e-27	0.403084	0.0676201	0.757895	0.158426
Notch3	240	3.64437e-20	3.79253e-19	0.55795	0.463428	0.440643	0.589894
Emilin1	241	9.49108e-29	1.48327e-27	0.653743	0.015905	0.67476	0.603379
Lrrc32	241	6.53231e-21	6.97719e-20	0.470747	0.373124	0.471629	0.464687
Oat	242	1.1275e-18	1.1013e-17	0.247246	0.465603	0.581196	0.336591
Pdia5	243	3.59286e-24	4.39632e-23	0.512249	0.393213	0.546673	0.522431
Cacna2d1	244	2.64029e-27	3.7935e-26	0.610525	0.361317	0.591682	0.552989
Phlda3	247	4.86141e-28	7.31511e-27	0.141867	-0.108766	0.938869	-0.827416
Gria3	247	3.05642e-18	2.91505e-17	0.412103	0.346845	0.425106	0.406616
Cyp4b1	248	3.7699e-12	2.57138e-11	0.37016	0.376418	0.35487	0.356583
Nrp1	249	6.63625e-25	8.4693e-24	0.639647	0.0514264	0.657517	0.627776
Grn	250	9.33322e-27	1.31969e-25	0.873762	0.512913	0.57786	0.660128
Il1r1	250	2.78961e-25	3.64367e-24	0.664365	0.186842	0.635314	0.634691
Gm47283	250	4.72009e-12	3.19503e-11	0.216201	0.508558	0.380653	0.362367
Apod	251	1.80931e-22	2.08774e-21	1.22277	0.788285	0.712796	1.25509
Ifi205	251	3.15671e-12	2.16641e-11	0.406076	0.407547	0.400863	0.401595
Tcf4	252	1.05684e-27	1.57958e-26	0.60931	-0.119017	0.782779	0.643724
Hspg2	253	1.11211e-27	1.65664e-26	0.660618	0.370602	0.82246	0.606412
Rbpms	253	5.50162e-12	3.71276e-11	0.312323	0.431263	0.270129	0.331023
Msn	254	1.64723e-27	2.42137e-26	0.813639	0.604053	0.92663	0.499695
Sept4	254	1.08668e-23	1.2976e-22	0.657948	0.317196	0.664011	0.649891
Map1lc3a	255	1.86578e-26	2.58884e-25	0.835347	0.221099	0.644933	0.226936
Ier5	256	1.90526e-26	2.63541e-25	1.00719	0.356528	0.270098	0.249476
Gcnt2	256	5.00019e-17	4.54507e-16	0.43654	0.375049	0.346584	0.379353
Htra3	257	2.89837e-19	2.93394e-18	0.498609	0.398621	0.499392	0.491214
Tspan3	258	2.57031e-27	3.71693e-26	0.476039	-0.0116317	0.801178	0.428108
Vat1	258	2.55329e-26	3.46718e-25	0.756341	0.45892	0.718558	0.592058
Piezo2	258	4.42987e-23	5.20597e-22	0.527487	0.362368	0.536428	0.525426
Tspan17	259	7.50218e-23	8.72446e-22	0.508295	0.231993	0.411511	0.504754
Capn2	261	1.34616e-25	1.80596e-24	0.624452	0.281687	0.523265	0.459854
Plaur	261	1.66624e-11	1.09299e-10	0.395118	0.490071	0.0668775	0.127439
Tubb2a	262	1.36596e-25	1.82703e-24	1.00247	-0.103778	0.985417	0.525288
Srgn	262	6.38704e-17	5.77036e-16	0.627408	0.559546	0.650506	0.622106
Krtcap2	263	2.43826e-21	2.66831e-20	0.385918	0.193389	0.755736	0.86894
Dpep1	263	3.09357e-14	2.38387e-13	0.390522	0.351782	0.385467	0.383772
Kdelr2	264	7.59957e-27	1.08142e-25	0.382289	0.0799662	0.850965	0.409259
Tcn2	264	1.53849e-25	2.0485e-24	0.791852	-0.242959	0.181008	0.531867
Ap1s2	265	4.66056e-17	4.24502e-16	0.349179	0.344692	0.417266	0.336555
Xbp1	266	1.95658e-25	2.57829e-24	0.803747	0.352086	0.41582	0.640931
Plp2	266	2.52543e-11	1.63969e-10	-0.473442	0.501833	-0.258147	-0.22509
Hist1h2bc	267	2.55348e-11	1.65549e-10	0.206635	0.548256	0.0646831	0.161897
Clmp	268	9.61149e-27	1.35046e-25	0.580564	-0.20197	0.611729	0.500032
Steap3	268	4.32795e-22	4.88017e-21	0.51961	0.31058	0.519705	0.51424
Rbm3	268	3.08607e-11	1.97208e-10	-0.923851	0.625635	0.339176	0.0892714
Anxa2	270	6.21812e-23	7.25014e-22	0.936261	0.683676	0.850869	0.724854
Dcbld2	271	2.38389e-17	2.19377e-16	0.383852	0.316297	0.387831	0.378898
Tmsb10	272	1.25628e-26	1.74859e-25	0.677285	0.47454	1.08013	0.806221
Egflam	272	8.82564e-21	9.31502e-20	0.445459	0.282629	0.457121	0.452708
Ndufb7	272	3.6177e-11	2.30518e-10	-0.661511	0.491171	-0.0315475	0.21626
Mylk	273	1.98335e-25	2.60586e-24	0.657528	0.42697	0.664965	0.583359
Cyba	273	1.81352e-20	1.90955e-19	0.454931	0.215736	0.135993	0.828444
Tmem45a	273	1.99721e-18	1.92963e-17	0.429337	0.341119	0.437822	0.392106
Plod1	274	2.06455e-26	2.83812e-25	0.449526	-0.138179	0.628692	0.388445
Msx1	275	2.22476e-26	3.04895e-25	0.600878	0.156409	0.646103	0.554369
Id3	276	2.26762e-26	3.09815e-25	1.21271	-0.426333	1.40991	0.590968
Sphk1	276	3.80052e-25	4.93513e-24	0.653259	-0.217438	0.621165	0.448495
Rnf19b	276	3.97923e-19	4.00984e-18	0.551283	0.437739	0.32082	0.428833
Asap1	277	2.35007e-26	3.20098e-25	0.595853	-0.363542	0.719958	0.580219
Map7d1	277	4.58314e-25	5.91689e-24	0.702548	0.193947	0.60748	0.45016
Slc9a3r2	277	2.35727e-20	2.46462e-19	0.556241	0.169205	0.481775	0.59253
Pcbd2	277	1.10661e-16	9.87742e-16	0.217795	0.418921	0.352484	0.522598
Degs1	278	5.34029e-25	6.87447e-24	0.72849	0.181924	0.610022	0.479534
Tfpi2	278	2.53578e-21	2.76822e-20	0.566004	0.263749	0.572111	0.56141
Vstm4	278	2.28436e-15	1.87722e-14	0.410951	0.355273	0.42245	0.409031
P3h1	280	5.32313e-26	7.20646e-25	0.601515	0.401294	0.651299	0.536634
Tgfbr2	280	4.122e-21	4.44538e-20	0.516081	0.37829	0.484031	0.509215
Ahnak	281	1.04343e-24	1.32405e-23	0.931932	-0.220381	0.602093	0.26828
Steap4	281	3.91606e-21	4.24383e-20	0.657723	0.458845	0.621197	0.487599
Osmr	282	1.08716e-24	1.37148e-23	0.732827	0.325305	0.676495	0.42514
Slfn5	282	9.71569e-11	6.04381e-10	0.286052	0.290051	0.274954	0.260678
Rhob	283	1.70136e-25	2.25532e-24	0.73872	-0.150845	1.01273	0.250103
Kif1a	283	1.09004e-24	1.37148e-23	0.558385	0.315901	0.560362	0.425004
Dnajb1	283	3.05128e-17	2.78492e-16	0.657285	0.691736	0.85893	0.147126
Tmem119	284	1.76474e-25	2.3324e-24	0.545827	0.0564192	0.566661	0.492362
Cebpb	284	2.40762e-24	2.97876e-23	0.818803	-0.207993	0.683997	0.239686
Rtp4	284	1.78814e-10	1.09101e-09	0.292271	0.423147	-0.112647	0.325202
Cox4i2	287	2.36353e-23	2.79236e-22	0.998161	0.186458	0.954571	0.925513
Adgre5	287	7.69791e-19	7.61922e-18	0.500594	0.378764	0.475054	0.499408
Fap	288	2.71188e-22	3.10507e-21	0.528032	0.122354	0.546015	0.512769
Rspo1	289	9.19624e-12	6.12258e-11	0.199835	0.194285	0.188925	0.207842
Ehd2	290	1.97181e-22	2.26937e-21	0.529156	0.292544	0.572381	0.52837
Parp14	290	2.61656e-10	1.56853e-09	0.263942	0.271432	0.101548	0.241061
Amn	291	7.48007e-25	9.51892e-24	0.452813	0.328088	0.544443	0.44545
Olfm1	291	7.09134e-21	7.53814e-20	0.415063	0.299941	0.413174	0.401187
Fbn2	292	1.06497e-24	1.34755e-23	0.620689	-0.96092	0.683383	0.528759
Ltbp4	292	1.24484e-12	8.78689e-12	0.357751	0.3747	0.413278	0.368428
Pura	293	7.11114e-10	4.14026e-09	0.0017347	0.375409	0.00505608	0.165585
Itm2a	294	1.31812e-24	1.64914e-23	0.578309	-0.293613	0.701938	0.543319
Adam23	294	5.27927e-13	3.76222e-12	0.263997	0.237129	0.278898	0.265432
Ckb	296	1.00372e-23	1.20177e-22	0.734092	0.154335	0.696162	0.556433
Nptn	297	7.70873e-22	8.62681e-21	0.592126	0.420102	0.613539	0.565789
Meis2	298	3.27517e-10	1.95283e-09	0.212653	0.223844	0.22874	0.225573
Pdia6	299	2.6022e-24	3.21059e-23	0.442341	0.171006	0.912426	0.561465
Apbb2	301	3.92115e-24	4.78487e-23	0.597959	0.22979	0.616922	0.507391
Cd47	301	6.37669e-10	3.742e-09	0.341441	0.491727	0.286736	0.489559
Anapc11	302	1.92689e-18	1.86573e-17	0.00831998	0.233838	0.645644	0.711405
Arhgap29	303	1.6051e-16	1.4213e-15	0.399122	0.315819	0.376291	0.380015
Kcnj8	304	5.77602e-10	3.40296e-09	0.333519	0.333569	0.339855	0.319074
Meis3	306	1.87805e-09	1.0683e-08	0.18179	0.199629	0.1842	0.179081
Trim35	308	7.13578e-24	8.63662e-23	0.440905	0.154442	0.655773	0.335039
Dpysl2	308	1.35228e-17	1.26535e-16	0.38254	0.309346	0.412813	0.389622
Loxl3	309	8.53168e-24	1.02703e-22	0.484612	0.139425	0.596345	0.454982
Hmgcr	309	2.40153e-09	1.35569e-08	0.161682	0.253998	0.244437	0.209045
Atf5	310	2.45042e-09	1.37979e-08	0.253557	0.401326	0.29843	0.343028
Sema7a	311	1.50839e-19	1.54446e-18	0.405741	0.293711	0.400894	0.389584
Gpsm3	311	2.49356e-09	1.39878e-08	-0.313666	0.280234	-0.16462	-0.0920506
Col27a1	312	1.3116e-23	1.562e-22	0.486599	0.234187	0.54851	0.41451
Prnp	312	2.25569e-23	2.67203e-22	0.616482	-0.00996532	0.653284	0.241039
Iqgap1	312	2.54992e-09	1.4268e-08	0.154288	0.497552	0.234824	0.189546
Acot7	313	2.55747e-09	1.42923e-08	0.0326337	0.343978	0.121476	0.199946
Mcoln2	315	2.4226e-11	1.57522e-10	0.277022	0.268889	0.298791	0.279177
Adamts1	316	3.45639e-23	4.07269e-22	0.818674	0.491939	0.963974	0.339305
Btg1	316	3.09036e-22	3.52033e-21	0.929568	0.128323	0.512931	0.515881
Nes	316	9.18525e-18	8.68601e-17	0.431812	0.290841	0.441893	0.44406
Slc2a1	317	3.77111e-09	2.09695e-08	0.203463	0.422994	0.253944	-0.17672
Cmtm3	318	3.40559e-22	3.86951e-21	0.519634	0.255004	0.565478	0.510654
Kctd11	319	3.63387e-22	4.11838e-21	0.612143	0.174198	0.545917	0.480223
Dpm3	320	2.42449e-17	2.22195e-16	0.384592	0.315755	0.480064	0.589057
Procr	320	2.80106e-11	1.80288e-10	0.303439	0.305586	0.317408	0.271851
Pkm	321	4.09929e-09	2.27375e-08	-0.945938	0.560622	-0.0180246	-0.377322
Socs2	322	5.9218e-23	6.92275e-22	0.484113	-0.461355	0.705062	0.360068
Zc3h12a	322	2.07613e-14	1.6223e-13	0.414061	0.336339	0.19914	0.344621
Errfi1	323	4.40583e-22	4.95544e-21	0.913052	-1.4444	0.137629	-0.121213
B4galnt1	324	4.46517e-09	2.46748e-08	0.135647	0.212749	0.0360912	0.132312
Zfhx3	325	6.77921e-21	7.22359e-20	0.486429	0.296436	0.40097	0.447714
Ly6a	325	5.06762e-09	2.79347e-08	0.21462	0.601145	-0.652187	-0.167132
Il33	327	6.92414e-09	3.76099e-08	0.238236	0.364535	0.243022	0.23971
Jam3	328	1.13013e-22	1.30743e-21	0.36155	-1.47973	0.506429	0.218511
Mafb	328	1.15375e-21	1.28149e-20	0.634462	-0.194652	0.589928	0.396716
Angpt2	329	7.32451e-12	4.8984e-11	0.27387	0.248585	0.278425	0.285264
Nav1	330	2.14931e-21	2.35788e-20	0.517257	0.0996884	0.513672	0.442893
Pla2g16	330	5.18331e-15	4.12258e-14	0.428793	0.378365	0.0327944	0.49922
Nfe2l2	331	2.65531e-22	3.04813e-21	0.70054	-0.255825	0.764152	0.429573
Zcchc14	331	2.37557e-12	1.65325e-11	0.344571	0.298011	0.334584	0.321552
Tns1	332	2.11001e-20	2.21129e-19	0.488314	0.192192	0.485578	0.444529
Bok	332	7.21901e-09	3.91638e-08	-0.460538	0.329699	0.316303	-0.0435615
Gas1	335	3.84098e-22	4.34206e-21	0.381218	-0.36766	0.684328	0.121525
Ext1	336	5.14706e-22	5.77456e-21	0.511491	0.0443682	0.592353	0.421032
Slco2a1	336	1.75676e-17	1.63353e-16	0.648308	0.457351	0.570247	0.327321
Pea15a	336	1.93745e-16	1.7088e-15	0.463038	0.300408	0.243237	0.486033
Antxr1	338	7.99803e-22	8.9058e-21	0.476209	0.202273	0.534938	0.430464
Psmb10	338	1.68836e-08	8.88883e-08	-0.173566	0.323481	0.0558477	0.16942
Rpn2	339	5.04426e-18	4.79044e-17	0.133395	0.460453	0.696768	0.596469
Ifngr1	340	8.17027e-19	8.05097e-18	0.55602	0.165487	0.393015	0.520063
Ntrk2	340	1.91224e-13	1.42905e-12	0.318971	0.260919	0.321112	0.301928
C1ra	341	7.79917e-21	8.27083e-20	0.543158	0.310759	0.542935	0.48319
Trpc1	341	2.15885e-08	1.12858e-07	0.179085	0.188652	0.185647	0.173927
Alad	342	4.0228e-16	3.4927e-15	0.204912	0.345768	0.320756	0.514565
Gm42418	342	2.43939e-08	1.27374e-07	0.441006	0.640752	-0.0507974	0.213828
Hcfc1r1	343	2.55427e-08	1.3317e-07	0.254402	0.477582	0.0407602	-0.136991
Txnrd1	344	2.63828e-21	2.87308e-20	0.657414	-0.0532552	0.769297	0.579547
Nol3	344	3.05915e-08	1.5795e-07	0.160601	0.182542	0.164847	0.144093
Mnd1	346	5.81751e-09	3.18319e-08	0.200401	0.380759	0.380709	0.396168
Igsf10	347	3.5568e-21	3.8639e-20	0.436641	0.0318189	0.470003	0.354845
Hrct1	347	3.33607e-08	1.71383e-07	0.186403	0.201156	0.198792	0.185985
C1qtnf2	349	4.6052e-16	3.99058e-15	0.344707	0.211396	0.342106	0.341417
Ecm2	349	1.71307e-15	1.41559e-14	0.353826	0.263901	0.3483	0.35359
Nr4a3	350	1.80588e-17	1.67571e-16	0.508495	0.359215	0.506869	0.410745
Dennd2a	352	4.82373e-21	5.17708e-20	0.445244	0.118043	0.474541	0.402826
Il11	352	9.05418e-10	5.23052e-09	0.310648	0.304128	0.332368	0.283506
Serinc1	353	1.85724e-20	1.95098e-19	0.609353	-0.00801872	0.61814	0.533836
Psmb8	353	4.55881e-08	2.32855e-07	-0.70864	0.386516	-1.17554	-0.391611
Mmp11	354	7.42253e-12	4.95652e-11	0.284301	0.239423	0.292038	0.272155
Tmem37	355	1.12126e-15	9.35226e-15	0.428755	0.243711	0.418524	0.422498
Esam	355	1.422e-08	7.53099e-08	0.298248	0.291627	0.289038	0.294549
Cspg4	356	1.0829e-17	1.01756e-16	0.414382	0.157087	0.412955	0.391632
Il17ra	356	2.92961e-16	2.55352e-15	0.474035	0.337095	0.463595	0.373922
S100a16	357	4.62472e-10	2.72828e-09	0.503457	0.533705	0.604283	0.580235
Eif4e3	359	4.47616e-20	4.64728e-19	0.506416	0.280258	0.476319	0.429349
Mdk	359	4.54911e-19	4.57376e-18	0.939845	-0.0494984	0.896626	0.844101
Nr1h3	359	9.95716e-09	5.33057e-08	0.211184	0.202263	0.186673	0.204884
Spp1	360	1.06425e-07	5.30813e-07	0.264547	0.956376	0.699361	0.262609
Creg1	361	1.07156e-07	5.33801e-07	0.059382	0.394693	0.290483	0.333293
Tgm2	363	6.43958e-11	4.02271e-10	0.167661	0.354975	0.402456	0.343689
Cpxm1	364	1.77655e-19	1.8107e-18	0.608909	0.0898222	0.612577	0.546507
Ccl7	364	1.51307e-11	9.95455e-11	0.615332	0.509097	0.598202	0.582958
Pxdn	365	6.61499e-19	6.5766e-18	0.424122	0.0453721	0.425452	0.378041
Pi16	365	3.44916e-08	1.76581e-07	0.235835	0.235929	0.236819	0.23285
Snai1	366	7.87034e-20	8.1333e-19	0.448568	0.120481	0.481625	0.297695
Tspan11	366	3.64076e-15	2.95372e-14	0.31197	0.129153	0.313893	0.311884
Senp2	366	1.19816e-07	5.93617e-07	0.271559	0.299606	0.206027	0.213916
Snapc5	367	1.43219e-07	7.06418e-07	0.109642	0.231065	0.0325221	0.201901
Ctsd	368	1.39412e-19	1.43074e-18	0.791838	0.355399	0.337816	0.12367
Lpar1	368	1.0084e-17	9.49561e-17	0.396434	0.229897	0.412865	0.380593
Igf1	368	2.77837e-11	1.79087e-10	0.263291	0.24994	0.290555	0.20908
Fbln1	369	1.20788e-19	1.24248e-18	-0.0522693	0.361492	0.680556	0.160801
Tspan15	370	1.40852e-14	1.11036e-13	0.396975	0.213324	0.408286	0.452462
Lix1l	371	1.60787e-19	1.64254e-18	0.309398	-0.371809	0.433859	0.243157
Cped1	371	2.92268e-16	2.55248e-15	0.336954	0.0989733	0.346721	0.329232
H2-Q4	371	1.65677e-07	8.12694e-07	0.161695	0.365347	-0.371552	0.10185
Pcdh7	372	2.09374e-19	2.12912e-18	0.42682	0.0714294	0.474103	0.340064
Apbb1ip	372	1.61595e-18	1.5715e-17	0.355725	0.245211	0.39098	0.346301
Sp100	373	1.82942e-07	8.93446e-07	0.13731	0.173132	0.0222008	0.149434
Lman1	374	3.59379e-12	2.45502e-11	0.286757	0.411129	0.511664	0.488299
Gpr153	375	4.99286e-19	4.98615e-18	0.399349	0.244124	0.424998	0.344113
Vamp5	375	1.63703e-09	9.34787e-09	0.358855	0.329037	0.0976905	0.344314
Adcy6	376	4.03603e-10	2.39368e-09	0.248137	0.211895	0.211893	0.243919
Ap3s1	379	2.14948e-14	1.67667e-13	0.42533	0.123737	0.473508	0.559529
Syne2	379	2.24223e-07	1.0879e-06	0.0708187	0.238839	0.0300035	0.03383
Mxd4	381	9.08425e-19	8.93185e-18	0.554091	-0.0967954	0.630508	0.288891
Mfap4	381	5.21332e-16	4.46541e-15	0.604574	0.169373	0.616363	0.589746
Slit2	382	9.21099e-19	9.03651e-18	0.428483	0.2356	0.518792	0.362112
Tubb3	382	1.33456e-09	7.64028e-09	0.18716	0.206095	0.232357	0.169575
Il15ra	383	4.88848e-16	4.21147e-15	0.381115	0.2493	0.34868	0.364041
Emp2	384	4.95529e-19	4.95975e-18	0.631387	-0.198725	0.277876	0.303744
Pcdh1	384	6.82865e-10	3.99144e-09	0.293667	0.264507	0.192565	0.300696
Frmd6	385	5.48579e-19	5.46616e-18	0.543832	0.190954	0.52642	0.464682
Adamts5	385	1.14613e-16	1.02098e-15	0.446194	0.234864	0.4447	0.422791
Ypel3	385	9.1815e-16	7.68692e-15	0.500558	0.344984	0.278282	0.312255
Kazn	386	2.50912e-18	2.41374e-17	0.515678	0.253398	0.518534	0.465261
Isg15	386	2.95303e-07	1.42061e-06	0.338813	0.575264	-0.446533	0.358611
Ifnar2	387	2.53783e-13	1.87766e-12	0.426893	0.334347	0.388162	0.458249
Cdkn1a	388	7.16784e-19	7.11037e-18	0.854248	0.175844	0.637822	0.0669798
Samd4	388	6.00179e-16	5.10152e-15	0.386988	-0.0145661	0.392543	0.375621
Ccng1	388	1.56556e-07	7.68797e-07	0.204775	0.216257	0.18673	0.173347
Crem	389	1.67291e-18	1.62335e-17	0.587362	0.194754	0.63768	0.509825
Arl6ip1	389	3.36678e-07	1.6021e-06	-0.294757	0.365973	0.0112992	0.00989242
Gm14005	390	3.82978e-14	2.94608e-13	0.43271	0.297169	0.368778	0.437267
Picalm	391	2.54157e-18	2.43969e-17	0.487234	0.166447	0.523571	0.387533
Gadd45g	393	8.85846e-15	7.0081e-14	0.861894	0.619998	0.687934	0.565324
Etfb	394	4.29643e-07	2.02287e-06	-0.207149	0.376309	0.183945	0.33662
Dlc1	395	3.07518e-18	2.92668e-17	0.464183	-0.0234135	0.519468	0.308003
Ube2l6	395	4.45211e-07	2.09395e-06	0.207548	0.22366	0.135511	0.211105
Gclc	396	6.37005e-09	3.47698e-08	0.264029	0.238327	0.264464	0.266502
Rasl11a	398	3.12116e-13	2.28646e-12	0.427625	0.354542	0.479632	0.196225
Rhoq	399	1.31462e-18	1.28125e-17	0.525509	-0.253955	0.290682	0.453077
Gja4	399	4.32849e-08	2.21344e-07	0.317548	0.299015	0.328559	0.309328
Mrpl33	402	4.79804e-11	3.0227e-10	-0.111875	0.399667	0.22204	0.52142
Anapc13	404	8.3757e-08	4.20579e-07	0.0302262	0.322291	0.160463	0.35406
Cntn1	405	3.78755e-13	2.74752e-12	0.339077	0.255133	0.357847	0.342529
Art3	407	4.14476e-15	3.34434e-14	0.38477	0.312172	0.475519	0.399705
Tnfrsf21	407	1.2105e-13	9.16937e-13	0.384245	-0.0393238	0.383597	0.388911
Scpep1	409	4.6557e-16	4.0187e-15	0.457887	0.219991	0.501242	0.457482
Fbxl7	410	1.45657e-17	1.35723e-16	0.452225	-0.349276	0.458813	0.353314
Dnajc3	410	3.87403e-15	3.13157e-14	0.563735	0.0964918	0.443012	0.553309
Gpx3	410	1.3648e-10	8.40774e-10	0.456906	0.372646	0.415386	0.471002
Ugcg	411	2.20305e-17	2.03155e-16	0.412843	0.0917651	0.447195	0.382731
Reln	411	1.20324e-06	5.48538e-06	0.0397983	0.160947	0.144569	0.0413732
Zc3hav1	413	1.32962e-06	6.03484e-06	0.0353929	0.219866	-0.0882712	-0.0341381
Bach1	415	1.35696e-17	1.26707e-16	0.544204	0.206723	0.52172	0.376701
Flna	415	1.33393e-06	6.04409e-06	0.145125	0.376297	0.28537	0.237832
Zeb1	417	9.71736e-17	8.72603e-16	0.378074	-0.280255	0.397179	0.336594
Selenon	417	2.76744e-11	1.78899e-10	0.254446	0.20416	0.24885	0.262261
Qpct	421	1.6963e-06	7.59329e-06	0.062327	0.24533	0.227174	0.11593
Pnp	422	7.56775e-17	6.80945e-16	0.399679	0.373762	0.580229	0.425306
Limd1	423	2.64561e-17	2.41962e-16	0.486547	0.289946	0.481359	0.405587
Fscn1	424	9.87521e-17	8.84993e-16	0.0335091	-0.714584	0.547582	-0.519169
Ccl11	424	3.44121e-08	1.76377e-07	0.341931	0.315343	0.343004	0.349455
Rassf8	425	1.03602e-16	9.26594e-16	0.325516	0.0328532	0.375902	0.246112
Shc4	425	1.9602e-10	1.18947e-09	0.195048	0.155334	0.197445	0.186425
Prkacb	426	1.86917e-10	1.13733e-09	0.280309	0.270565	0.329541	0.273812
Ank2	427	1.21376e-13	9.17841e-13	0.260791	0.20645	0.306374	0.282725
Ndufa12	427	4.18336e-12	2.84468e-11	-0.135708	0.335288	0.381041	0.574615
Crabp1	429	4.26535e-15	3.43542e-14	0.611142	0.171577	0.670697	0.602822
Rnf11	430	2.84394e-16	2.48859e-15	0.481216	0.307666	0.349651	0.296595
Luzp1	431	5.73931e-17	5.20629e-16	0.633279	-0.321221	0.629469	0.0741717
Cercam	431	7.4979e-07	3.48234e-06	0.132532	0.131955	0.133491	0.108715
Srxn1	432	5.84761e-17	5.29375e-16	0.523243	0.230223	0.451935	0.428242
Tsc22d3	432	7.62301e-10	4.42671e-09	0.330164	0.285219	0.338966	0.27194
Dtx3	433	7.18253e-17	6.47591e-16	0.510968	0.146583	0.401887	0.249953
Cpd	433	1.03207e-08	5.50522e-08	0.236697	0.206517	0.22911	0.254646
C1rb	434	2.84036e-14	2.19254e-13	0.358579	0.245776	0.373718	0.328799
Mgst3	435	2.99644e-06	1.30589e-05	-0.0744739	0.316323	-0.111461	0.0236374
Fbln7	437	3.34974e-16	2.91401e-15	0.198007	-0.256822	0.409358	0.172756
Pbxip1	437	2.05065e-08	1.07328e-07	0.211764	0.298091	0.321665	0.352259
Sf3b5	439	1.37542e-11	9.08921e-11	-0.331344	0.116648	0.235036	0.440479
Maff	440	1.47345e-16	1.30732e-15	0.739255	-0.729893	0.300325	0.265545
Aida	440	5.41291e-13	3.85129e-12	0.376065	0.260258	0.379549	0.321262
Sec61b	441	4.92361e-16	4.23354e-15	-0.0137363	0.122852	0.716494	0.622874
Bace2	441	8.01865e-14	6.1156e-13	0.41653	0.282798	0.248695	0.388611
Mustn1	441	9.00154e-09	4.85974e-08	0.241929	0.203532	0.241034	0.238016
Cgref1	442	5.11254e-13	3.6551e-12	0.346879	0.101265	0.344671	0.336878
Stat2	442	2.42246e-11	1.57522e-10	0.278314	0.206905	0.173568	0.209886
Rbms3	443	5.43721e-16	4.64824e-15	0.31111	0.172801	0.387911	0.193925
C2	443	4.73606e-06	2.03418e-05	0.158361	0.168857	0.129934	0.147842
Pdgfa	444	5.5144e-16	4.7052e-15	0.567933	0.185887	0.664193	0.203194
Vcam1	444	1.71782e-13	1.28808e-12	0.362697	0.161712	0.386246	0.366177
Fzd1	446	4.62216e-16	3.99749e-15	0.411237	0.204786	0.429309	0.285162
Ly6c1	446	3.23049e-07	1.54053e-06	0.307577	0.295676	0.251996	0.288116
Rnf149	447	2.46797e-16	2.16811e-15	0.538692	0.175855	0.515165	0.399073
Wfs1	447	3.56075e-06	1.54276e-05	0.120304	0.122021	0.0999012	0.118618
Cd44	448	2.65413e-16	2.32707e-15	0.6688	0.140565	0.5392	0.455608
Edil3	448	5.94678e-16	5.06443e-15	0.255187	0.115768	0.362299	0.204167
Dgkh	448	4.72849e-14	3.61868e-13	0.30949	0.148639	0.319124	0.290551
Adgrf5	448	2.87848e-10	1.7186e-09	0.241836	0.185078	0.237365	0.238384
Ctdspl	449	6.70299e-12	4.50303e-11	0.283117	0.200845	0.288755	0.284958
Acly	449	6.24083e-07	2.91064e-06	0.14109	0.230448	0.158005	0.265932
Bloc1s1	450	2.95465e-11	1.89353e-10	0.330917	0.182045	0.320486	0.407938
Ifi47	450	6.08794e-06	2.58491e-05	0.178128	0.186603	0.0774582	0.160673
Col16a1	451	8.04509e-16	6.78652e-15	0.432377	0.224752	0.54369	0.22697
Irgm2	451	2.08642e-06	9.26511e-06	0.121419	0.117303	0.0746868	0.10649
Scarf2	452	8.52325e-16	7.16275e-15	0.330242	0.0526419	0.355302	0.30867
Hspa1b	452	6.35132e-06	2.69417e-05	0.115428	0.255903	-0.0459784	-0.055226
Tmbim1	455	5.10994e-16	4.38529e-15	0.62969	0.141579	0.284798	0.105019
Tceal8	455	1.44357e-15	1.19733e-14	0.455102	0.292244	0.627	0.509967
Prex2	455	1.32439e-11	8.77801e-11	0.25129	0.168619	0.250787	0.247673
Map4k4	456	1.59016e-15	1.31647e-14	0.321396	-0.187481	0.530945	0.299526
Il4ra	456	4.03033e-10	2.39348e-09	0.199608	0.239335	0.305577	0.130509
Unc5b	457	6.50589e-16	5.51947e-15	0.39187	-0.14395	0.328065	0.331893
Plec	457	1.76058e-15	1.45216e-14	0.500076	-0.0146422	0.611664	0.0968955
Hspb8	457	7.30856e-06	3.08553e-05	0.0767294	0.290673	-0.177021	-0.0179589
Klf4	458	7.05467e-16	5.97367e-15	0.886914	0.28334	0.627109	0.309823
Pear1	458	1.99727e-12	1.40313e-11	0.272332	0.142046	0.277455	0.260929
Sh2b3	459	2.06321e-15	1.69862e-14	0.388858	0.10216	0.410734	0.340851
Pde10a	459	1.02415e-13	7.78423e-13	0.295488	0.141929	0.304465	0.278247
P4ha2	461	5.15924e-13	3.68257e-12	0.325664	0.17069	0.292588	0.303234
Cxcl9	461	3.76605e-06	1.62854e-05	0.222564	0.219312	0.201545	0.223668
Nfkbiz	462	8.08547e-16	6.80769e-15	0.570134	0.0246637	0.483939	0.3433
Hif1a	462	2.49382e-15	2.04557e-14	0.244341	0.325426	0.543425	0.0290482
Os9	462	1.80446e-13	1.35076e-12	0.43278	0.280338	0.284315	0.33411
Dclk1	464	8.74336e-16	7.33389e-15	0.403475	0.117981	0.391534	0.309136
Ppp1r15a	464	2.46869e-13	1.82954e-12	0.600456	0.386509	0.204376	0.187254
Map1a	465	3.80505e-15	3.0814e-14	0.306452	0.18271	0.325512	0.268634
Myd88	466	5.0443e-13	3.61793e-12	0.391145	0.244672	0.369805	0.363321
Fam171b	466	3.26412e-06	1.41838e-05	0.0918254	0.0893514	0.102256	0.097843
Hivep2	467	9.79593e-16	8.18594e-15	0.448546	-0.136418	0.342374	0.193988
Smoc2	467	2.54384e-12	1.76484e-11	0.443645	0.29791	0.421303	0.407335
Zdhhc20	468	7.14617e-10	4.15523e-09	0.366385	0.328062	0.440776	0.13681
Cachd1	469	4.41542e-15	3.54347e-14	0.294017	-0.128561	0.338234	0.268396
Gchfr	469	1.17201e-10	7.25019e-10	0.204496	0.146508	0.209457	0.233762
Prkg2	470	4.4481e-15	3.56328e-14	-0.154465	-0.303425	0.531059	-0.0769274
Duoxa1	470	1.48508e-05	6.03515e-05	0.098643	0.16587	0.0705604	0.107976
Tril	471	2.32269e-12	1.61898e-11	0.227328	0.099285	0.249701	0.233024
Extl3	471	1.51042e-05	6.1214e-05	0.126718	0.161672	0.136955	0.129601
Irak3	472	5.05115e-06	2.16325e-05	0.125101	0.123679	0.0881275	0.124148
Adam19	473	1.36657e-08	7.24605e-08	0.182748	0.150954	0.180076	0.176385
Gamt	474	8.1051e-10	4.69442e-09	0.262453	0.199295	0.277318	0.276702
Pmepa1	475	4.65779e-07	2.18607e-06	0.410852	0.379868	0.142491	-0.206994
Arl13b	476	6.18169e-15	4.90789e-14	0.531873	0.156655	0.537428	0.355452
Ddah1	476	2.09188e-10	1.26421e-09	0.195583	0.168205	0.223807	0.245301
Fam214b	477	1.58633e-08	8.37146e-08	0.229639	0.195753	0.146779	0.153543
Irf8	478	3.87858e-12	2.64146e-11	0.366333	0.237235	0.386993	0.356147
Enc1	478	1.75874e-05	7.08268e-05	0.0545715	0.136214	0.110772	0.0682846
Matn2	479	1.65404e-14	1.29931e-13	0.299403	-0.00711623	0.351379	0.209747
Cr1l	479	2.58201e-07	1.24597e-06	0.228117	0.265509	0.149378	0.311412
Dpysl3	481	1.82635e-14	1.43214e-13	0.27694	-0.332554	0.398519	0.276024
Wwtr1	482	2.94754e-15	2.40887e-14	0.544643	-0.00323254	0.351582	0.362161
Csrp1	482	1.81577e-05	7.30574e-05	0.159309	0.325742	-0.247392	-0.0384102
Egfr	483	3.06516e-15	2.49626e-14	0.39056	0.227142	0.338891	0.327994
Cdr2	483	2.70219e-14	2.0895e-13	0.356545	0.210459	0.391426	0.25986
B3glct	484	4.57845e-12	3.10387e-11	0.272691	0.192847	0.285311	0.270075
F830016B08Rik	484	2.96961e-07	1.42528e-06	0.229618	0.206208	0.213337	0.235602
Jam2	485	4.20034e-13	3.042e-12	0.240834	0.0951561	0.217902	0.218731
Actn1	485	1.89252e-05	7.60078e-05	0.161734	0.287709	0.104139	0.223157
Ghr	486	4.39856e-15	3.53632e-14	0.426173	0.140795	0.383997	0.277722
Cxcl10	486	1.91269e-05	7.67488e-05	0.138661	0.437953	0.359835	0.273231
Epas1	487	4.48214e-15	3.58411e-14	0.428788	0.189859	0.350433	0.315971
Fmo1	487	2.33248e-11	1.52106e-10	0.231053	0.11121	0.121961	0.214342
Fabp4	487	7.78347e-08	3.92167e-07	0.337467	0.293824	0.344488	0.331648
Pold4	488	5.06534e-15	4.03596e-14	0.47547	0.0969777	0.403258	0.252117
Dkk3	488	1.58895e-14	1.25039e-13	0.343729	-0.37172	0.348137	0.232677
Tbx15	488	2.02515e-08	1.06118e-07	0.167764	0.139918	0.174309	0.164777
Mef2a	489	6.32122e-15	5.00973e-14	0.475441	0.20206	0.350639	0.339262
Nid2	489	1.02976e-10	6.39685e-10	0.227608	0.116111	0.253168	0.243549
Gan	489	1.0938e-05	4.51091e-05	0.166515	0.184842	0.165808	0.184432
Mef2c	490	4.01614e-14	3.08412e-13	0.374811	-0.0726614	0.411871	0.236154
Tulp4	490	2.20675e-05	8.80722e-05	0.132186	0.24081	0.111094	0.139749
Pdgfra	491	4.10451e-14	3.14656e-13	0.288816	0.0340173	0.324105	0.230452
Adgra2	491	3.13549e-12	2.15517e-11	0.243017	0.0518418	0.241174	0.22219
Cxcl16	491	2.23631e-05	8.9172e-05	0.0804578	0.302913	-0.619635	0.0494457
Tmem150a	492	5.07321e-13	3.63281e-12	0.317292	0.207623	0.27872	0.28161
Rgs16	493	9.7179e-15	7.67438e-14	0.60681	0.186873	0.560745	0.499453
Ptbp3	493	6.28669e-10	3.69405e-09	0.409851	0.305427	0.294237	0.364003
Syce2	495	2.68353e-05	0.000105961	0.00760383	0.116616	0.0725526	0.0737065
Ranbp1	496	6.54918e-10	3.83816e-09	-0.667657	0.304693	0.366853	0.522923
Cdv3	498	8.50938e-14	6.47877e-13	0.304664	0.256347	0.613848	0.387442
Myo1b	498	2.97155e-05	0.000117023	0.0344335	0.319657	0.210203	0.0700717
Twist2	499	4.50686e-13	3.24815e-12	0.291727	0.0995378	0.298345	0.269052
Cpq	500	2.22884e-14	1.73553e-13	0.430571	-0.48876	0.332586	0.294559
Cast	500	3.22612e-05	0.000126378	0.0679493	0.269839	-0.112477	-0.0285401
Dnajb9	501	2.25621e-14	1.75378e-13	0.544502	0.017329	0.364371	-0.00811628
Tgfb1i1	502	1.34303e-13	1.01045e-12	0.301641	0.180417	0.324454	0.143768
Ftl1-ps1	502	5.68135e-08	2.88867e-07	0.339843	0.306421	0.382802	0.237747
Hexb	503	2.36163e-14	1.83253e-13	0.463082	-0.0312252	0.434481	0.206636
Phldb1	503	2.26375e-13	1.68046e-12	0.356447	0.176928	0.366847	0.31594
Acot9	503	4.72987e-07	2.21756e-06	0.278285	0.248949	0.135502	0.200323
Agpat4	504	1.48325e-13	1.11406e-12	0.325251	0.10612	0.42367	0.174509
Frat2	504	3.56587e-05	0.000139441	-0.0743834	0.186857	-0.00603174	-0.0012499
Elf1	505	4.73033e-11	2.98426e-10	0.509856	0.354605	0.458695	0.248994
Chst1	506	9.94732e-08	4.97254e-07	0.17916	0.149606	0.17119	0.169664
Stx11	507	5.48741e-14	4.19227e-13	0.361146	0.106448	0.240218	0.223973
Tpbg	508	1.98758e-13	1.48286e-12	0.361751	-0.201602	0.470335	-0.00959394
Tnfrsf1a	509	2.00641e-13	1.49441e-12	0.392668	-0.74067	0.539448	0.0937112
Sdc2	509	3.09219e-13	2.26897e-12	0.499943	-1.22088	0.447915	0.447486
Stac2	510	4.40888e-09	2.4394e-08	0.186006	0.148766	0.206903	0.131675
Serinc3	511	2.63597e-13	1.94703e-12	0.4436	0.265833	0.144082	0.381571
Mark1	511	9.07338e-06	3.78043e-05	0.144287	0.139476	0.140772	0.117443
Peak1	512	1.29481e-13	9.75819e-13	0.396089	-0.00582187	0.330427	0.318636
Tmem5	512	1.2326e-09	7.08385e-09	0.319945	0.0552416	0.290135	0.374448
P4ha3	512	1.30784e-06	5.95008e-06	0.132712	0.133206	0.147451	0.121
Akap12	513	3.08179e-13	2.26507e-12	0.39958	-0.34367	0.458048	0.289972
H13	513	2.85107e-11	1.83242e-10	0.489826	0.209556	0.443443	0.479592
Impact	514	3.01043e-12	2.07883e-11	0.205656	0.179006	0.299165	0.239259
Arhgef12	515	3.29768e-13	2.4118e-12	0.384002	-0.0870982	0.437927	0.185182
Mgat4b	515	2.95881e-08	1.53403e-07	0.223582	0.19663	0.247031	0.241388
Crispld1	516	3.31453e-13	2.42015e-12	0.240976	-0.841533	0.299902	0.139299
Herpud1	517	3.39185e-13	2.47255e-12	0.331916	-0.00322905	0.483029	0.264031
Atp2b4	517	1.53701e-11	1.00971e-10	0.283347	0.068121	0.227864	0.260966
Nsdhl	517	5.5215e-05	0.000211459	-0.0517089	0.136556	0.0481895	0.122005
Cnn3	518	3.75175e-13	2.72599e-12	0.0806851	-0.0131767	0.621289	0.334145
Atox1	518	5.59789e-05	0.000214017	-0.448386	0.363346	-0.0446358	0.09035
Pls3	519	2.04303e-13	1.51914e-12	0.402367	0.202593	0.244062	0.329672
Hacd4	522	1.05438e-10	6.54068e-10	0.212302	0.0765829	0.171658	0.203086
Ammecr1	522	2.08006e-06	9.25003e-06	0.121665	0.163138	0.185754	0.180621
1500009L16Rik	523	4.7955e-13	3.45059e-12	0.164891	-0.178099	0.327542	0.2101
Mlf1	523	1.77404e-10	1.08389e-09	0.330837	0.244215	0.352414	0.28773
Arhgap31	524	4.47427e-13	3.22989e-12	0.405037	0.188967	0.361237	0.351149
9930111J21Rik2	524	6.42574e-05	0.0002442	0.095619	0.106071	0.0222686	0.0529445
Sh3pxd2b	525	2.68966e-13	1.9834e-12	0.365131	0.136006	0.347007	0.297381
Anxa6	525	7.06547e-05	0.000267371	-0.00528797	0.293493	0.261625	0.182511
Rtn4	526	3.03697e-13	2.23581e-12	0.606819	0.183807	0.343449	0.0789749
Reep3	526	5.83175e-13	4.14268e-12	0.370584	-0.22246	0.495888	0.24641
Lsm6	526	7.15768e-05	0.000270631	-0.791044	0.225755	0.0145895	0.144351
Kremen1	527	1.11302e-05	4.58595e-05	0.149238	0.14259	0.153033	0.128336
Rnf125	528	3.82449e-09	2.12398e-08	0.198703	0.133861	0.127052	0.227091
Zbp1	529	7.76467e-05	0.00029234	0.0274294	0.156482	-0.183081	-0.00533974
Osr1	530	7.94683e-05	0.000298442	0.050965	0.163357	0.107828	0.0160419
Camk2n1	531	4.31066e-13	3.11683e-12	0.327951	0.0733292	0.236392	0.189302
Ttc28	531	8.13512e-12	5.42422e-11	0.27029	-0.222573	0.243772	0.239332
Man1c1	531	3.00682e-07	1.44159e-06	0.15431	0.125017	0.137471	0.151683
Tmod3	532	9.45032e-13	6.68122e-12	0.434728	0.272498	0.284082	0.38296
Palld	532	9.26979e-09	4.9985e-08	0.34609	0.273756	0.332719	0.107914
Tnfsf9	533	1.82125e-12	1.2815e-11	0.312646	0.277463	0.468123	0.211584
Ptprd	533	2.28779e-12	1.59715e-11	0.217372	-0.0390941	0.2318	0.195548
Slc3a2	534	4.84367e-13	3.47963e-12	0.617288	-0.280188	0.275523	0.102397
Fam3a	534	8.70282e-05	0.000326008	0.0675853	0.139296	0.0481256	0.125644
Tacc1	535	3.32176e-12	2.27268e-11	0.269725	0.260341	0.432842	0.223523
Ank	536	2.17098e-12	1.51798e-11	0.313502	-1.0216	0.340707	0.290818
Ppp1r2	537	4.69678e-09	2.59225e-08	0.466673	0.263797	-0.103905	0.502054
Hacd1	538	9.50535e-09	5.10346e-08	0.13493	-0.0477624	0.30028	0.301939
Adgrl1	539	2.79915e-12	1.93895e-11	0.248447	0.0838682	0.277498	0.199366
Fads3	539	9.51027e-09	5.10346e-08	0.161012	0.120391	0.170577	0.310438
Bcr	539	8.65018e-06	3.61425e-05	0.215314	0.196934	0.168823	0.196697
Ltbp3	540	5.95414e-13	4.22289e-12	0.430953	0.0620262	0.243037	0.053249
Runx1	541	6.6286e-13	4.69376e-12	0.504474	0.147231	0.348445	0.258141
Fmod	541	2.84529e-12	1.96785e-11	0.360172	-0.0312316	0.37955	0.286646
Lhfpl2	543	3.06592e-12	2.11387e-11	0.240019	0.14436	0.375818	0.246973
Cd59a	543	1.00647e-08	5.37508e-08	0.24834	0.157011	0.189245	0.220188
Fstl3	544	5.06801e-11	3.18377e-10	0.262829	0.127852	0.23753	0.239926
Cpeb4	545	1.43075e-12	1.00832e-11	0.324634	0.184406	0.192221	0.236617
Dab2	545	3.29993e-12	2.26121e-11	0.331162	-0.0518214	0.349195	0.295256
Reck	545	5.36826e-09	2.95188e-08	0.187524	0.132928	0.188699	0.168113
Cry2	546	2.44512e-06	1.07934e-05	0.170411	0.153791	0.154229	0.147625
Tgfb2	547	2.05822e-12	1.44367e-11	0.401784	-0.265161	0.290605	0.347744
Ctla2a	547	2.54462e-10	1.52746e-09	0.568935	0.323296	0.562399	0.526734
1110032A03Rik	547	0.000127213	0.000469045	0.0700332	0.120476	0.050535	0.0784934
Hivep3	548	2.11749e-12	1.48291e-11	0.325251	0.136465	0.237659	0.268766
Cblb	548	3.09422e-12	2.13009e-11	0.335515	0.208836	0.287444	0.270112
Abi3bp	548	3.31184e-10	1.97205e-09	0.288508	0.0929779	0.289395	0.271725
Col8a2	550	2.69325e-10	1.61233e-09	0.232866	0.131901	0.233625	0.217897
Mvp	550	6.16459e-05	0.000234676	0.174308	0.170004	-0.0376785	0.091606
Ssh1	552	2.4775e-12	1.7215e-11	0.309057	0.0976278	0.307151	0.265979
Itga8	552	4.07075e-10	2.41105e-09	0.252254	-0.0370192	0.219361	0.237621
Cd151	552	5.25691e-08	2.67592e-07	0.332463	0.282349	0.39071	0.249052
Maf	553	5.04424e-12	3.40927e-11	0.128514	0.0872401	0.282082	-0.0824859
Igf1r	553	2.73431e-07	1.31803e-06	0.229941	0.177768	0.186988	0.167199
Robo2	554	5.66258e-12	3.8156e-11	0.247191	0.0587731	0.269739	0.207659
Papss2	555	2.06929e-10	1.25226e-09	0.2162	0.0761761	0.201518	0.19663
Plod2	556	6.20657e-12	4.17584e-11	0.207484	0.113285	0.318766	0.185887
Il1rl1	557	2.18269e-06	9.6637e-06	0.191451	0.176427	0.186846	0.197118
Irf7	559	0.000206845	0.000747603	0.214794	0.2737	-0.244539	0.235249
Runx2	560	2.5791e-11	1.66967e-10	0.273252	0.0324721	0.298606	0.25785
H2-T23	560	0.000209678	0.000756198	-0.048767	0.213904	-0.322277	-0.275725
Hmcn1	561	4.20489e-12	2.85497e-11	0.31167	0.0490762	0.322725	0.22694
Msrb1	562	0.000212488	0.000765557	-0.190336	0.198446	-0.187613	-0.0948609
Pfkfb4	563	6.83641e-06	2.89185e-05	0.148921	0.128138	0.115574	0.121942
Map2k3	565	7.04948e-12	4.72867e-11	0.532545	-0.446513	0.273614	-0.0356237
Slc16a3	565	1.81018e-06	8.07872e-06	0.149137	0.160605	0.195115	0.140266
Lmna	566	7.16881e-12	4.80149e-11	0.592612	-0.689404	0.253673	-0.480721
Medag	566	1.21506e-11	8.06541e-11	0.199401	-0.461368	0.291022	-0.093818
Nr2f2	567	1.367e-11	9.047e-11	0.274207	0.158028	0.317817	0.248355
Npw	567	2.38202e-10	1.43761e-09	0.213103	-0.264701	0.374013	0.322036
Vmp1	567	1.85485e-07	9.04874e-07	0.407821	0.326458	0.281827	0.388511
Cxcl12	568	1.39319e-11	9.19297e-11	0.250062	-0.781314	0.380489	0.204975
Cox6b2	568	2.14182e-06	9.50166e-06	0.175837	0.156715	0.200103	0.160358
Tmem108	569	0.000267726	0.000953199	0.100814	0.107682	0.0970704	0.0849524
Podxl2	570	1.42921e-11	9.4167e-11	0.193783	0.0363201	0.220705	0.131357
Znrf1	571	4.95959e-08	2.52746e-07	0.258656	0.218658	0.283095	0.302324
6030408B16Rik	571	2.67373e-06	1.17676e-05	0.142283	0.120364	0.14125	0.135453
Col13a1	572	9.77319e-12	6.49698e-11	0.271075	-0.588617	0.273288	0.231272
Ndufc1	572	3.11865e-07	1.4888e-06	-0.233737	0.284703	0.23014	0.397729
Ptpre	574	3.37833e-06	1.46658e-05	0.204306	0.174168	0.163169	0.100134
Phldb2	575	0.000299263	0.0010604	0.0801625	0.0862062	0.0699614	0.0304067
Lsp1	576	2.4709e-09	1.38781e-08	0.222986	0.047109	0.228226	0.217381
Dip2a	577	1.28984e-05	5.28027e-05	0.117037	0.105695	0.106703	0.115602
Cyp51	578	2.77277e-11	1.78984e-10	0.2683	0.133834	0.417089	0.338841
St6galnac4	579	6.62797e-08	3.35085e-07	0.194291	-0.0660753	0.230823	0.237589
Snx18	579	1.86166e-05	7.48362e-05	0.135222	0.140902	0.162019	0.167666
Hilpda	580	1.69885e-11	1.11275e-10	0.464963	0.12247	0.408117	0.370892
Cpe	581	0.000247387	0.000882196	-0.163332	0.375123	0.355712	-0.185478
Fnip1	582	1.87636e-11	1.22721e-10	0.379192	0.171533	0.284895	0.257141
Aen	582	2.52739e-09	1.41598e-08	0.17672	0.181478	0.295113	0.206168
Gas6	583	2.02396e-11	1.32181e-10	0.489958	-0.561704	0.250607	0.23467
Tubb2b	583	3.01267e-11	1.92794e-10	0.486263	0.192155	0.564998	0.379025
C1qtnf12	583	0.000351173	0.00123242	-0.35323	0.227926	0.10359	-0.325938
Ifi207	584	1.35396e-06	6.12237e-06	0.124213	0.0995948	0.118209	0.121929
Zbtb38	585	0.00011567	0.000428257	0.156273	0.156767	0.155067	0.16146
Spsb1	586	3.67601e-11	2.33565e-10	0.295315	0.026135	0.333407	0.0811609
P2ry2	586	8.55644e-08	4.29171e-07	0.143064	0.0680644	0.142889	0.157208
Cbfa2t3	586	1.66774e-06	7.47297e-06	0.141546	0.116385	0.123287	0.130128
Arhgdib	587	3.86785e-11	2.45055e-10	-0.710628	0.297438	0.562786	0.164712
Piezo1	587	2.52954e-10	1.52046e-09	0.333901	0.217455	0.307508	0.251724
Ybx3	587	6.73225e-10	3.94027e-09	-0.0947494	-0.194086	0.434756	0.392584
Igfbp2	588	4.00732e-11	2.53531e-10	-0.696663	-0.44301	0.751159	-1.09883
Tinagl1	588	0.000374105	0.00130996	-0.326505	0.209845	-0.0382932	-0.414438
Nectin3	589	4.18703e-11	2.64526e-10	0.213402	-0.0385789	0.234734	0.185512
Cdkn2b	589	5.35446e-06	2.28656e-05	0.237708	0.205155	0.171231	0.245193
Agmo	590	1.7521e-08	9.2135e-08	0.209213	0.142705	0.19781	0.201099
Ttc9	590	4.50437e-05	0.000174261	0.0899656	0.0887136	0.0783248	0.0943638
Cnn2	591	3.09779e-09	1.72902e-08	0.382335	0.256984	0.457169	0.421716
Trp53inp2	591	9.47752e-07	4.36534e-06	0.147319	0.11763	0.064096	0.0999492
Jag1	592	4.9909e-11	3.13976e-10	0.184554	0.113753	0.308988	0.065508
Parp9	592	0.000399052	0.00138966	0.0524389	0.114812	-0.0719387	0.0935723
Zbtb20	593	2.87471e-11	1.84495e-10	0.521122	0.0245839	0.465167	0.275092
Sobp	593	5.24449e-11	3.28536e-10	0.208521	-0.046754	0.241979	0.156788
Dennd5b	594	5.39459e-11	3.37465e-10	0.262435	-0.088662	0.303678	0.107156
Gpi1	594	0.000423954	0.00146949	-0.368497	0.241502	-0.126482	-0.304152
Eng	595	3.14773e-11	2.0086e-10	0.370485	0.0372183	0.334399	0.266974
Klrb1a	595	8.90934e-05	0.000333464	0.0617895	0.0930912	0.103196	0.0768665
Lipa	596	1.45725e-07	7.17984e-07	0.231301	0.0927758	0.0750541	0.255118
Gpcpd1	598	0.000458675	0.00158122	0.114682	0.138535	0.0729427	0.108794
Sash1	599	3.64496e-11	2.31924e-10	0.365119	-0.885939	0.166302	0.208636
Tsen34	599	6.72283e-11	4.19377e-10	0.10569	0.0263163	0.413755	0.307881
Rnf122	600	3.71871e-11	2.35942e-10	0.308846	0.0938493	0.315941	0.242708
S100a10	601	7.7242e-11	4.81169e-10	0.256823	-0.058972	0.656272	-0.374304
Trip12	604	0.000532679	0.00181805	-0.0331705	0.234639	-0.111282	-0.250951
Ttyh2	605	1.16203e-10	7.19845e-10	0.209517	0.117449	0.228949	0.186902
Dennd4c	605	0.000152861	0.000558526	0.0909913	0.0974392	0.072807	0.103305
Etv4	606	3.51324e-10	2.08918e-09	0.0645609	-0.0826546	0.215403	0.167226
Vdr	606	0.000562054	0.00191537	0.0939415	0.131457	-0.0181077	0.0774171
Clcf1	607	5.1305e-11	3.21849e-10	0.292803	0.0422102	0.265079	0.0820914
Heatr5a	607	3.0151e-07	1.44401e-06	0.181954	0.156401	0.198036	0.211603
Sdc3	608	5.57121e-09	3.0597e-08	0.163164	0.0949562	0.19878	0.125986
Mgll	609	1.35207e-10	8.3409e-10	0.325002	0.177899	0.404354	0.241869
Atp2c1	609	2.52671e-10	1.52046e-09	0.338649	0.20967	0.229896	0.264013
Trim30a	610	0.000561852	0.00191537	0.064041	0.0778307	0.000921088	0.0744118
Tead1	611	1.50338e-10	9.24872e-10	0.185792	-0.0373616	0.317242	0.2018
Rftn1	611	3.06766e-07	1.46603e-06	0.181051	0.118278	0.112185	0.193496
Stxbp1	612	1.17501e-10	7.25865e-10	0.284668	0.0546868	0.275878	0.223721
Plpp1	613	1.592e-10	9.78036e-10	0.255567	0.143143	0.283835	0.133232
Pde5a	613	4.70178e-05	0.000181314	0.115742	0.103887	0.11216	0.108865
Tap1	614	0.000666615	0.00224592	-0.00111624	0.143716	-0.108344	-0.0461525
Insig1	615	1.69882e-10	1.03936e-09	0.229094	0.0733732	0.275027	0.204544
Notch1	615	3.48087e-07	1.6511e-06	0.271211	-0.0622361	0.251526	0.334935
Gbp7	615	1.45833e-06	6.56766e-06	0.149358	0.138969	0.0980435	0.186881
Man2b1	616	0.000346753	0.00121994	0.113748	0.150876	0.138972	0.130566
Sbno2	617	1.61722e-10	9.92165e-10	0.42049	0.061335	0.181988	0.178706
Akr1b3	617	1.8588e-10	1.13257e-09	-0.536629	0.146919	0.4492	0.227843
Alas1	617	8.4132e-07	3.89931e-06	0.236569	0.176651	0.159568	0.185429
Nqo2	618	3.59728e-07	1.70269e-06	0.120524	0.104032	0.151549	0.159252
H6pd	618	5.49967e-05	0.000210805	0.0870588	0.0877083	0.0555249	0.102298
Pkd2	619	1.93682e-10	1.17689e-09	0.251537	-0.0808314	0.29594	0.230246
Hist1h1c	619	0.000775497	0.00259509	-0.0130968	0.179913	0.00389381	0.00680541
Rgs3	620	1.66467e-10	1.01987e-09	0.281839	0.101671	0.253595	0.238962
Frmd4a	620	1.96688e-10	1.1919e-09	0.311314	0.193097	0.387425	0.281363
Gm4951	623	0.000475074	0.0016327	0.0940218	0.0967714	0.0505282	0.094348
Arid3a	625	9.73016e-06	4.04274e-05	0.128751	0.105401	0.101929	0.110659
Fkbp11	626	2.85829e-10	1.70883e-09	0.197379	-0.0547187	0.454612	0.344585
Irf5	626	0.000935276	0.00310874	0.0500649	0.0749762	0.054601	-0.0646516
Plekhf1	627	2.46594e-10	1.48624e-09	0.376545	-0.156109	0.24148	0.256688
Dcxr	627	0.000978261	0.00324194	0.0323657	0.111066	-0.164557	-0.0120585
Clec3b	628	0.000144429	0.000529454	0.132001	0.117808	0.141393	0.132512
Rtl8b	629	2.02737e-09	1.15087e-08	0.183196	0.152026	0.237192	0.211632
Rrad	630	0.000410654	0.00142561	0.164893	0.168557	0.169429	0.122559
Ptx3	631	4.56224e-10	2.69499e-09	0.420511	-0.186915	0.442719	0.166193
Isg20	631	0.000579172	0.00196618	0.119849	0.118255	-0.0893737	0.0251895
Arhgap17	633	1.27295e-09	7.30632e-09	0.31978	0.159013	0.312375	0.28075
Wisp2	633	4.03563e-05	0.000157121	0.161791	0.151053	0.118342	0.175708
Tmem127	634	0.000207394	0.000748567	0.12326	0.114498	0.0969925	0.124421
Cox17	635	0.00121963	0.00398842	-0.101124	0.21546	-0.0602402	0.19224
Entpd2	636	1.8329e-06	8.17191e-06	0.178175	0.135673	0.170788	0.162261
Cmklr1	637	1.86896e-07	9.10761e-07	0.178368	0.0769461	0.175685	0.173696
H2afj	637	2.44514e-05	9.69784e-05	-0.29249	0.264911	0.0679218	0.373335
Trim47	638	1.68464e-08	8.87972e-08	0.363877	-0.377388	0.207271	0.337998
Gngt2	638	1.05775e-06	4.84196e-06	0.190768	0.155207	0.190089	0.197439
Slc35e4	639	4.42425e-10	2.61695e-09	0.388616	-0.205314	0.140311	0.272487
Mcam	639	6.98492e-10	4.07744e-09	0.285407	0.118045	0.318883	0.224461
Nt5e	639	0.00147721	0.00478507	0.0060601	0.0814853	0.00166677	-0.0143917
Zfp131	642	7.82332e-06	3.29349e-05	0.266049	0.207154	0.22994	0.07308
Arl4a	644	6.21276e-10	3.65544e-09	0.372062	-0.641729	0.177047	-0.010107
Stc1	644	4.20646e-07	1.9826e-06	0.228922	0.136037	0.181341	0.224124
C1qtnf1	644	1.27809e-06	5.82067e-06	0.142695	0.13418	0.121465	0.187232
Inhba	646	9.46794e-07	4.36534e-06	0.422506	0.332303	0.41679	0.236406
Angptl4	647	1.04343e-09	6.01222e-09	0.517963	-1.31579	0.558834	-0.311059
Slco3a1	647	2.34934e-07	1.13863e-06	0.213379	0.0503901	0.201877	0.208606
Plekhg3	647	0.00161891	0.00522888	0.0360644	0.0829822	0.0257549	0.0563252
Tcp11l2	648	7.01956e-10	4.09229e-09	0.349418	0.000405208	0.253388	0.196365
Zfp36	648	0.0016446	0.00530745	0.204931	0.326207	0.0546995	-0.0487188
Sgms2	650	0.00166885	0.00537848	0.0549928	0.136991	-0.115641	-0.049542
Gstm1	651	7.89432e-10	4.5783e-09	0.384472	-0.230846	0.155371	0.197976
Sned1	651	1.32181e-09	7.57703e-09	0.217843	-0.155152	0.233246	0.147574
Fgl2	651	2.33584e-09	1.32196e-08	0.279131	-0.291146	0.28296	0.246938
Hopx	651	0.000108321	0.000401716	0.110781	0.109095	0.0571241	0.124606
Lrrc17	652	1.02323e-07	5.10927e-07	0.178667	0.0880956	0.179064	0.173867
Pgrmc1	653	8.37379e-10	4.84375e-09	0.456532	0.0996403	0.307509	0.397601
Parvb	653	4.86569e-05	0.000186987	0.122496	0.107944	0.114576	0.118654
Rabgef1	654	1.02216e-09	5.89726e-09	0.295973	0.0411289	0.0895479	0.143298
Ephb2	654	4.59477e-07	2.15877e-06	0.130002	0.0922426	0.134766	0.126544
Fam20c	654	1.16708e-06	5.326e-06	0.166622	-0.0224109	0.167832	0.18642
Cryab	655	1.11034e-09	6.38947e-09	0.613335	-0.209685	0.261648	0.214395
Dpt	656	2.95668e-07	1.42061e-06	0.229926	0.162158	0.220962	0.219327
Pgpep1	656	0.00194667	0.00621984	0.0264012	0.0726141	-0.0256957	0.0133757
Spry1	657	1.73306e-09	9.88355e-09	0.219037	-0.0729485	0.276495	0.131501
Spire1	657	9.31016e-09	5.0142e-08	0.164682	0.0321055	0.20492	0.17991
Cadm4	657	0.000979229	0.00324274	0.0844867	0.0837517	0.0104936	0.0706409
Lrrn4cl	658	7.2944e-05	0.000275566	0.107066	0.0901237	0.09106	0.0966587
Ace	659	1.34012e-06	6.06596e-06	0.140045	0.0732758	0.0952001	0.143976
Ccnb2	659	0.00204997	0.00651718	-0.338394	0.101981	0.0806333	0.0905444
Tmem189	660	0.00205205	0.00651913	0.033647	0.124387	0.0612084	0.0562988
Tmem159	661	2.29341e-09	1.2996e-08	0.2735	0.0266223	0.279938	0.245118
Jak2	661	6.39811e-09	3.48803e-08	0.25057	0.152607	0.233837	0.193542
Ptprg	661	2.96197e-08	1.53403e-07	0.206392	0.00771235	0.23116	0.210074
Ggt5	662	1.54093e-09	8.81037e-09	0.24498	0.119514	0.236089	0.176354
Hmg20b	662	1.51044e-06	6.78859e-06	0.23022	0.222151	0.266414	0.323246
Mtus1	662	8.89852e-06	3.71105e-05	0.217462	0.177693	0.13689	0.235599
Nr1d1	663	4.51656e-06	1.94365e-05	0.168989	0.130126	0.140967	0.162108
Dlg4	664	1.83395e-09	1.04455e-08	0.202905	0.00237806	0.203931	0.156422
Arhgef25	664	2.37598e-09	1.34297e-08	0.189597	0.0156112	0.221776	0.145353
Adamts7	664	2.10627e-05	8.42886e-05	0.0653241	0.077844	0.105853	0.0858861
Ifrd1	665	2.02835e-09	1.15087e-08	0.587438	-0.381498	-0.273649	0.168237
Serpina3n	665	2.43153e-09	1.37089e-08	0.231479	0.152812	0.418445	-0.442115
Dap	666	2.45671e-09	1.38159e-08	-0.64014	-0.0844765	0.474307	0.0047292
Nek7	666	0.00238219	0.00747728	0.0651934	0.167224	-0.0458196	0.0653451
Zbtb4	667	0.000497153	0.00170464	0.0973001	0.0916409	0.0505481	0.0693543
Cenpm	669	0.000990115	0.00327149	-0.40721	0.100906	0.110366	0.0994378
Ntn1	670	0.00123411	0.00402394	0.0339558	0.0520965	-0.0157738	0.0561439
Utrn	671	3.34573e-09	1.86507e-08	0.278933	-0.0106481	0.238087	0.186946
Bmp2	671	9.44968e-09	5.0832e-08	0.217846	0.133344	0.217896	0.172121
Mbnl2	673	3.46137e-09	1.92712e-08	0.126665	-0.0522089	0.439825	0.0824602
Tspo	673	0.00146154	0.00473779	-0.00438975	0.317322	0.138829	0.314226
Itga2b	674	3.4488e-07	1.63763e-06	0.142118	0.034544	0.128641	0.13534
Lgals3	676	0.00290447	0.00904018	-0.536713	0.394454	-1.72221	-0.588647
Plekho2	677	4.1748e-09	2.31276e-08	0.192837	0.0842424	0.194836	0.153155
Omd	677	5.60768e-07	2.62635e-06	0.173998	-0.0523911	0.173634	0.170242
Zc3h7a	678	0.000338434	0.00119255	0.193485	0.171745	0.162474	0.136482
Nr2f1	679	1.92847e-08	1.01171e-07	0.168703	0.106669	0.174283	0.152052
Creb3l2	680	5.23452e-09	2.8819e-08	0.220278	-0.0312916	0.33892	0.103006
Cebpa	680	5.81095e-09	3.18319e-08	0.257462	0.137721	0.237978	0.125497
Arfrp1	680	0.002962	0.00921282	-0.032748	0.143707	0.0505939	0.0696977
Casp4	681	5.86226e-09	3.20374e-08	0.372481	-0.620105	0.296916	0.160551
Rasl12	681	0.00100928	0.00332741	0.0655023	0.0750626	0.078482	0.0768307
Naglu	683	6.49927e-09	3.53884e-08	0.204397	0.0549587	0.174815	0.171618
Far1	684	0.00326538	0.0101	0.138966	0.193794	0.107914	0.104189
1190002N15Rik	685	5.68017e-09	3.1157e-08	0.202655	0.124001	0.234639	0.164617
Agrn	685	1.48904e-05	6.04573e-05	0.220271	0.162987	0.203012	0.142793
Hpcal1	686	6.39514e-08	3.24049e-07	0.308369	-0.0896608	0.262449	0.294729
Alg3	687	0.000675679	0.00227473	-0.00291634	0.102265	0.100694	0.117791
Map6	688	6.90854e-09	3.7571e-08	0.154758	-0.00941066	0.189751	0.145278
Ppt1	688	1.09234e-08	5.81276e-08	0.306877	0.113964	0.330998	0.280343
Hoxb2	688	0.00358699	0.0110487	-0.0710331	0.077747	-0.023649	-0.0174002
Ptpn1	689	8.28951e-09	4.4862e-08	0.402527	-0.406123	0.413176	-0.077873
Cds2	689	0.00372781	0.0114666	0.0180612	0.113927	0.0929834	0.0702878
Bdnf	690	7.70118e-09	4.17288e-08	0.199266	-0.173097	0.250711	0.0987851
Itgb3	691	2.4818e-06	1.09445e-05	0.135448	-0.0606981	0.132539	0.141512
Tnks1bp1	691	0.00380837	0.0116901	0.0935263	0.110263	-0.00122986	0.0875792
Nsa2	692	0.00381095	0.0116901	-0.16625	0.203375	-0.0103597	-0.186061
Clcn4	693	1.22634e-07	6.069e-07	0.283764	0.0133818	0.281269	0.26495
Akap2	694	1.02284e-06	4.69662e-06	0.165656	0.107367	0.159137	0.152337
H2afy2	695	8.74144e-09	4.72504e-08	0.104859	-0.174824	0.184509	0.112675
Rnf217	695	2.97e-08	1.5364e-07	0.173838	0.0811188	0.220075	0.18647
Heg1	695	0.000404603	0.00140679	0.149348	0.131392	0.0562575	0.125932
Cdc42bpa	697	1.08402e-08	5.77537e-08	0.23151	0.100463	0.156678	0.127004
Ccdc167	697	0.00421263	0.0128281	-0.0295614	0.068787	0.0488572	0.0462197
Slc7a2	698	1.73094e-05	6.977e-05	0.118809	0.0894433	0.0956715	0.111543
Fgfr1	699	9.96143e-09	5.33057e-08	0.4005	-0.692307	0.491227	-0.187177
Esyt1	699	1.45793e-08	7.71211e-08	0.253752	0.126454	0.238796	0.229622
Cdc42ep4	699	5.59321e-05	0.000214017	0.20271	0.163197	0.0684404	0.0412558
Lbh	700	9.96938e-09	5.33057e-08	0.196534	-0.430285	0.30277	0.0793404
Smad7	701	1.19269e-08	6.33916e-08	0.347305	0.135572	0.186406	0.0372383
Polr2i	701	0.0045072	0.0136751	-0.443669	0.175618	0.0543766	0.0292624
Nktr	702	1.20011e-08	6.37104e-08	0.425418	0.12736	0.23865	0.212089
Parp8	703	1.43822e-05	5.85542e-05	0.11852	0.08368	0.0813977	0.114749
Pkdcc	704	1.84572e-06	8.22083e-06	0.131713	-0.0211837	0.122557	0.128884
Ror1	705	0.000157186	0.000572982	0.0844877	0.0710483	0.0845293	0.0819532
Il10rb	706	4.10785e-06	1.77119e-05	0.167329	0.0939621	0.138189	0.182121
Fxyd6	706	5.86791e-06	2.49625e-05	0.195075	0.142503	0.124605	0.205181
Rwdd1	707	1.51994e-07	7.47218e-07	-0.175981	-0.270827	0.368691	0.34276
Tlnrd1	708	1.49002e-08	7.87253e-08	0.141729	0.174058	0.299567	0.224997
Atp8b1	708	2.50087e-07	1.20943e-06	0.197484	-0.00781496	0.165509	0.18699
Farp1	709	0.0012289	0.00401288	0.0643864	0.105154	0.059464	0.115841
Ell2	711	7.53565e-08	3.80111e-07	0.252769	0.112585	0.0962447	0.229741
Adamts9	712	1.81789e-08	9.54823e-08	0.18629	0.0532908	0.26918	0.0469389
Amfr	714	0.000260798	0.000929276	0.123059	0.12949	0.138603	0.153979
Sec23a	715	0.000146868	0.000537953	0.123084	0.113898	0.138851	0.129602
Elmod2	716	0.00544836	0.0163311	0.0292676	0.0531429	0.038568	0.0340513
Kdm1a	717	0.00444758	0.0135126	0.110346	0.171898	0.156137	0.096667
Penk	718	3.25314e-06	1.41499e-05	0.188456	-0.303828	0.199517	0.195771
Fam111a	719	2.31764e-06	1.02408e-05	-0.155637	0.10424	0.169806	0.162655
Klf6	720	2.55636e-08	1.3317e-07	0.554811	0.0410448	0.16241	0.0843816
Gna13	720	2.58122e-08	1.34308e-07	0.314304	0.128578	0.326115	0.230075
Plxnd1	720	2.17707e-06	9.64841e-06	0.123466	0.027468	0.135655	0.132819
Myh9	720	0.000221008	0.000794081	0.236718	0.206171	0.173127	0.231956
Smim3	721	2.69289e-08	1.39955e-07	0.230274	-0.209347	0.276672	-0.0818238
Xaf1	722	0.00551924	0.0165206	0.0799892	0.16053	-0.177566	0.0913511
Ccl8	723	0.00215935	0.00683563	0.0748616	0.0790129	0.0770992	0.0752698
a	725	2.7704e-06	1.2145e-05	0.166718	-0.109088	0.165112	0.162943
Tor3a	726	3.25242e-08	1.67278e-07	0.269275	0.068522	0.10212	0.0660479
Mapk12	727	0.000582558	0.00197617	0.0526858	0.0652048	0.0491942	0.0751185
Adora2b	728	3.06042e-08	1.5795e-07	0.104422	0.0547666	0.193023	-0.0427208
Man2b2	728	0.00239572	0.00751445	0.0667357	0.0735607	0.0768795	0.0611689
Ehd1	729	3.07054e-08	1.58289e-07	0.394762	0.0132956	0.426693	0.304465
Prkcg	729	4.82042e-05	0.000185568	0.0925844	0.0700901	0.0895614	0.0539103
Serpini1	730	3.1544e-08	1.62424e-07	0.211619	0.0229348	0.253057	0.150359
Plekhg2	731	3.39203e-08	1.74056e-07	0.201874	-0.0438888	0.234929	0.194028
Plekha6	731	9.74019e-06	4.04313e-05	0.0894354	0.0731446	0.011202	0.109884
Rai14	732	2.93214e-08	1.52212e-07	0.26103	-0.29362	0.263181	0.147136
Kdm6b	732	4.90322e-08	2.5016e-07	0.35549	0.0365314	0.243536	0.0804541
Gramd3	732	0.00650519	0.0193419	-0.0230334	0.127172	0.0443238	-0.0858821
Oasl2	733	0.00671987	0.019927	0.0588772	0.148872	-0.256089	0.0767048
Fam20a	735	0.000225176	0.000808165	0.161209	0.129931	0.0914325	0.144073
Tnfrsf11b	736	4.85704e-05	0.000186816	0.134242	0.0954286	-0.00309182	0.0487368
Ppp1r14a	737	0.000128489	0.000473359	0.133315	0.100778	0.118021	0.118676
Cask	738	1.18697e-05	4.87709e-05	0.144307	0.0891964	0.11704	0.175396
Nfe2l1	738	0.00695391	0.0205799	0.130732	0.163104	-0.0309123	0.0045212
Hsd11b1	739	1.22237e-05	5.0133e-05	0.180486	-0.01751	0.161662	0.217992
Ophn1	739	0.000586169	0.00198691	0.0977386	0.082805	0.0281159	0.0413495
Adamts14	740	3.58271e-05	0.000139977	0.0718722	0.0646452	0.0896348	0.0798925
Cd40	741	5.88932e-05	0.000224773	0.135742	0.111718	0.127171	0.117592
H2-T22	742	0.0074573	0.021982	0.052867	0.117751	-0.071609	-0.0202252
Cacna1g	744	6.0561e-08	3.0757e-07	0.136539	-0.0395564	0.154349	0.120236
Gramd1a	744	9.46711e-08	4.73781e-07	0.258625	0.143877	0.186013	0.19353
Socs1	745	6.33112e-08	3.21171e-07	0.153423	0.0442628	0.249658	0.056758
Got1	745	0.0076735	0.0225745	0.00540092	0.108686	0.0409361	0.0803807
Spry4	746	6.53471e-08	3.30745e-07	0.137764	-0.0611363	0.166367	0.0887084
Mir155hg	746	0.00776513	0.022829	0.0272442	0.0618163	0.0440606	0.0181508
Sgpl1	747	1.7978e-07	8.79933e-07	0.215275	0.127127	0.187328	0.15515
Capn5	748	0.00808362	0.0237027	0.0437147	0.0577608	0.00769536	0.0472346
Pdpn	749	7.28756e-08	3.68014e-07	-0.160323	-0.578399	0.308665	-0.491266
Tmcc3	749	1.54586e-05	6.25364e-05	0.119171	0.0835221	0.0849045	0.134153
Ncald	750	1.08396e-05	4.47864e-05	0.233763	-0.493847	0.0682669	0.240838
Dram1	751	7.82427e-08	3.93777e-07	0.149737	0.0346146	0.189606	0.118164
Ipmk	752	8.01595e-08	4.02969e-07	0.193283	0.0945793	0.212595	0.113616
Daxx	753	0.0088101	0.0256976	0.0118625	0.0980027	-0.0159196	0.0189118
Folr1	754	0.00891864	0.0259971	-0.0132705	0.0836669	-0.327351	0.0733772
Cdkn1c	755	8.95662e-08	4.48738e-07	-0.0547438	-0.420947	0.248938	-0.202795
Ankrd28	755	1.39537e-07	6.8902e-07	0.271941	-0.585204	0.255439	0.0786248
Stat5a	755	6.04476e-06	2.56902e-05	0.179452	-0.0664618	0.140329	0.169617
Pclaf	755	0.000619289	0.00209122	-0.976468	0.136778	0.124249	0.162861
Dot1l	756	1.68631e-07	8.26273e-07	0.249953	0.0471108	0.1273	0.186609
Cisd3	756	0.000502885	0.00172296	-0.0198213	0.118235	0.0932117	0.158359
Mtcl1	758	1.07263e-07	5.33801e-07	0.118915	0.0388697	0.139501	0.0531723
Galc	758	0.00944516	0.0274421	0.0568054	0.0672421	0.00905473	0.0605033
Rab3il1	759	1.08117e-07	5.37449e-07	0.144892	0.00893328	0.15465	0.106429
Trim3	759	6.83682e-06	2.89185e-05	0.120828	0.0842963	0.0897202	0.0911026
Rgs10	760	1.08852e-07	5.405e-07	-0.0800074	0.184878	0.341891	-0.0232475
Pgf	760	1.9389e-07	9.4381e-07	0.313294	0.139497	0.236034	0.23517
Ereg	761	1.17237e-07	5.81486e-07	0.113488	-0.0294978	0.182531	0.070815
Tgfbr1	762	2.00647e-07	9.75634e-07	0.273111	0.0110142	0.21954	0.14317
Sesn2	762	0.00988059	0.0286139	0.0594602	0.0818296	0.0411903	0.0168527
H2afz	763	1.31786e-07	6.51472e-07	-1.0903	0.131456	0.505347	0.177975
Rnh1	763	0.0019701	0.0062902	0.24198	0.228512	-0.129777	0.120001
Irf1	764	1.45103e-06	6.54802e-06	0.328035	0.20732	0.301299	0.137215
Rasa3	765	1.50444e-07	7.40416e-07	0.122841	0.0191125	0.164943	0.0988596
Gas7	766	2.57089e-07	1.24195e-06	0.145746	-0.0585885	0.149927	0.116976
Mrps21	768	3.21204e-05	0.000125937	-0.25863	0.195837	-0.0183963	0.344078
Bpgm	769	1.80669e-07	8.83316e-07	0.271429	-1.15095	0.373179	0.250109
Cep85	769	0.0104689	0.0301801	0.00263903	0.0462255	0.0218479	0.0208323
Layn	770	2.02339e-07	9.82788e-07	0.0854375	-0.0537676	0.172599	0.0675393
Ttc39b	770	5.7932e-06	2.46682e-05	0.17934	0.0326937	0.154952	0.176999
H2-M3	770	0.000122292	0.000451649	0.129756	0.0994964	0.127847	0.0932136
Enho	771	3.20159e-06	1.39393e-05	0.107442	0.0376652	0.126972	0.12398
Slc20a1	771	6.89432e-05	0.000261339	0.288828	0.205774	-0.0527519	0.214256
Ist1	772	3.05132e-07	1.45978e-06	0.282844	0.126259	0.175355	0.198628
Anpep	772	2.52384e-05	9.99217e-05	0.144189	0.0747449	0.0583331	0.149745
Tcta	772	0.00185631	0.00594821	0.0472859	0.0589387	0.0527028	0.0624051
Tgfbi	774	2.43885e-07	1.18072e-06	0.030367	-0.512079	0.248425	-0.15199
Samd9l	774	0.000137727	0.000506137	0.127935	0.0964772	-0.0468243	0.110218
Paip1	775	0.00718394	0.0212183	0.0429585	0.0665154	0.0790577	0.0411846
Cd34	776	8.40426e-07	3.89922e-06	0.194242	0.0444339	0.207007	0.188698
Has2	778	2.95486e-07	1.42061e-06	0.135146	-0.0447257	0.177413	0.113948
Aqp1	778	3.81374e-07	1.80132e-06	0.236907	-0.401054	0.224767	0.195174
H2-DMa	778	7.29961e-06	3.08467e-05	0.159386	0.109331	0.159129	0.156846
Rtn2	778	0.00120732	0.00395108	0.0631249	0.0553434	0.054293	0.0624576
Jcad	779	4.00997e-07	1.89199e-06	0.143348	-0.10294	0.123053	0.110607
Gabbr1	779	8.80891e-07	4.07424e-06	0.170943	0.103829	0.165696	0.143846
Nucb2	779	4.27167e-05	0.000165877	0.205082	0.0773824	0.190448	0.222107
Hfe	780	2.17894e-05	8.70403e-05	0.109121	0.0733357	0.0984964	0.110929
Xdh	780	0.00943131	0.0274197	0.0407613	0.0649015	-0.0881661	0.0570236
Cebpd	782	3.38134e-07	1.60731e-06	0.569905	-1.25402	0.628714	0.30466
Helz2	783	0.011043	0.0318148	0.0553572	0.0793608	-0.00254762	0.0718219
Ywhah	784	3.54712e-07	1.68073e-06	0.154891	-0.168534	0.415986	0.0606977
Ly96	784	5.5869e-06	2.38125e-05	0.198497	0.0695828	0.0885124	0.18683
Tgfb3	784	1.31437e-05	5.36591e-05	0.169319	0.117601	0.0706021	0.11366
Prr7	785	3.79911e-07	1.79631e-06	0.00807672	-0.0506298	0.176525	-0.0140165
Cdk6	786	0.0120099	0.034356	-0.448021	0.12857	-0.112769	-0.29348
Tctn1	787	0.00135895	0.00441546	0.0716316	0.0729451	0.0791956	0.0851842
Acap2	788	5.03647e-05	0.000193383	0.135596	-0.00253289	-0.0019565	0.189688
Gfra1	788	0.00113636	0.00373257	0.0804699	0.0643322	0.088338	-0.0502433
Etv1	789	5.19786e-05	0.000199408	0.134333	-0.184009	0.0559676	0.148744
Ubtd2	790	5.68775e-07	2.66106e-06	0.198746	0.0957104	0.185389	0.174287
Fdps	791	0.00468808	0.014166	-0.374433	0.196361	-0.00978217	0.206733
Tiparp	792	3.36574e-07	1.6021e-06	0.325793	0.0214432	0.33781	-0.0051434
Abcg2	792	2.68292e-05	0.000105961	0.146909	-0.14881	0.171823	0.176404
Tmem259	792	0.00189715	0.00607034	0.085925	0.110988	0.0751267	0.135641
Hras	793	1.13515e-05	4.67279e-05	-0.108408	0.195357	0.306056	-0.110001
Btbd7	794	0.00548648	0.0164336	0.154417	0.161938	0.152473	0.0728112
Def8	795	0.0127991	0.0365198	-0.0268694	0.0430914	-0.0113893	0.012984
Scara3	796	2.99201e-05	0.000117517	0.136046	-0.00564948	0.133769	0.138958
Cln5	796	0.00171079	0.00550569	0.109717	0.0962332	0.0486009	0.111393
Dennd4a	797	5.70119e-07	2.66454e-06	0.174357	0.0875635	0.18236	0.0974556
Furin	797	2.4798e-05	9.82654e-05	0.190838	0.147284	0.211612	0.107582
2700081O15Rik	800	6.17981e-07	2.88521e-06	0.147943	-0.00766142	0.161919	0.115331
Hebp1	800	6.62673e-05	0.000251624	0.103617	-0.387268	-0.0756389	0.23811
Pla2g7	800	0.0135913	0.0386561	-0.76142	0.175018	-0.339245	-1.20592
Man1a	801	6.84054e-07	3.18701e-06	0.195292	-0.152224	0.202993	0.0169637
Ddx21	802	6.87686e-07	3.20058e-06	0.0135896	-0.39482	0.348348	0.0940296
Cc2d1a	802	0.0141563	0.0401094	-0.0127348	0.0383956	-0.00459358	0.00648447
Slc12a4	803	7.3814e-07	3.43181e-06	0.130037	0.107041	0.204388	0.123801
Pik3r1	804	9.04931e-07	4.17735e-06	0.277084	0.0559093	0.200872	0.202533
Top1	805	9.05061e-07	4.17735e-06	0.41121	-0.266829	0.45522	-0.20446
Nudt18	805	0.0146398	0.0413723	0.0408572	0.0770131	0.0514256	0.0455671
Soga1	806	0.000161793	0.000589228	0.104138	0.079357	0.110266	0.0975992
Nr6a1	807	0.0148714	0.0418957	0.0324038	0.0535587	0.0174726	0.00520686
Tmem2	808	1.02267e-06	4.69662e-06	0.2709	0.0437472	0.231748	0.198705
Kif26b	808	1.5417e-05	6.24247e-05	0.0948823	0.0274519	0.131078	0.123789
Net1	808	0.0149735	0.0421567	-0.0713748	0.0678252	-0.00830763	-0.0144955
Srm	809	8.75597e-07	4.05396e-06	-0.505268	-0.122203	0.358144	-0.0208349
Mcl1	811	1.04525e-06	4.78966e-06	0.404263	-0.4583	-0.0365842	-0.021059
Batf	811	0.0154906	0.0435301	-0.516082	0.092997	-0.100649	-0.381456
Il17rd	812	1.01444e-06	4.66767e-06	0.103025	-0.130355	0.122051	0.0598869
Tmc4	812	0.0156067	0.0437735	0.0525562	0.0760498	-0.170549	0.0326687
Mdm2	813	1.0401e-06	4.77097e-06	0.249764	0.146532	0.29128	0.0290408
Blvrb	813	1.10972e-06	5.07464e-06	0.313721	-0.571541	0.038137	0.174836
Igf2bp2	814	0.00826693	0.0242054	0.0454368	0.049962	0.0410151	0.0461367
Kazald1	815	1.12162e-06	5.12377e-06	0.0812739	-0.364204	0.198315	0.0178891
Snta1	815	0.000107986	0.000400807	0.0986112	0.0640518	0.0442709	0.109527
Uqcc2	816	0.0162692	0.045603	-0.560881	0.204594	-0.0256395	0.150952
Sbf2	817	1.33054e-06	6.03484e-06	0.18607	0.060958	0.15361	0.142401
Ppard	817	0.00208187	0.00660915	0.112957	0.0918605	0.0977856	0.0548591
Nudt4	818	1.32008e-06	5.99964e-06	0.0800347	-1.37673	0.412841	0.0959581
Ogt	818	0.00855649	0.0249906	0.187688	0.173662	-0.111607	-0.22159
Tubb5	819	1.39476e-06	6.30045e-06	-0.807233	0.0608284	0.519017	-0.163114
Scml4	819	8.50125e-06	3.5587e-05	0.0982797	0.0297438	0.0825159	0.0905877
Vegfc	820	2.29922e-06	1.01695e-05	0.117828	0.0445563	0.123591	0.105741
Eif4a2	820	0.000313566	0.00110843	0.265889	0.203479	0.0197239	-0.0437786
Mpv17	821	0.000123588	0.000456058	0.104446	0.0508966	0.116485	0.148504
Cbl	821	0.00321663	0.00996999	0.114537	0.115306	0.139797	0.076496
Rcan1	822	1.45297e-06	6.55013e-06	0.260084	0.0114838	0.0980743	0.126968
Ubl4a	822	0.0179693	0.050022	-0.574795	0.157481	-0.070721	-0.0657381
Fas	823	1.49062e-06	6.70627e-06	0.172238	-0.172757	0.229352	0.0480814
Bcl10	823	1.54054e-06	6.9169e-06	0.36968	-0.0703854	0.222553	0.117832
Hmgn2	823	4.7882e-06	2.05261e-05	-0.719359	0.0385823	0.291397	0.261069
Ppp1r18	824	1.58747e-06	7.12044e-06	0.157214	0.100898	0.226656	0.0654854
Usp2	824	5.88922e-05	0.000224773	0.1356	-0.0387798	0.128871	0.137721
Arsa	824	0.00369863	0.0113847	0.0910432	0.0829101	0.0762629	0.0649475
Cgnl1	825	0.000129647	0.000477231	0.105923	0.0659426	-0.0251295	0.134066
Stt3b	825	0.000228597	0.000819784	0.10296	0.123083	0.177899	0.162488
Slc39a14	827	1.70113e-06	7.60725e-06	0.237757	-0.0210445	0.229485	0.0918045
Sod3	827	5.3038e-06	2.26709e-05	0.176459	-0.070404	0.168377	0.153836
Zhx2	827	0.0192856	0.0534191	0.0356845	0.0583261	0.0520819	0.0433587
Ccser2	828	1.74511e-06	7.79612e-06	0.263088	0.0257725	0.182315	0.214963
Ifit3	828	0.00498104	0.0150105	0.0686213	0.0685008	-0.0173559	0.0759602
Tmem97	829	4.4923e-05	0.000173989	-0.318967	0.056373	0.184041	0.171026
Cdipt	829	0.0196842	0.054388	-0.15462	0.122443	0.0345641	-0.0954861
Naaladl2	830	0.0205945	0.0566922	0.0470216	0.0599534	-0.0354077	0.0439417
Sardh	831	4.51107e-05	0.000174261	0.110537	0.00580506	0.0961661	0.107978
Cfb	831	0.00217026	0.00686528	0.0717512	0.0610319	0.0637449	0.0755075
Sncg	832	0.0216101	0.0591953	0.00391112	0.0844217	0.0775401	-0.173389
Meox1	833	1.44467e-05	5.8763e-05	0.117151	-0.171354	0.137464	0.12618
Crebrf	833	0.0100586	0.0291106	0.122705	0.119435	0.0809763	0.0575252
H2afx	834	2.08094e-06	9.25003e-06	-0.324471	0.0735315	0.259153	0.0945088
Rnf150	834	0.0219898	0.0601243	-0.00993319	0.0490188	0.0395919	-0.0630925
1110008P14Rik	835	0.000153996	0.000562211	-0.0428934	-0.236888	-0.0993922	0.222884
Klf7	835	0.0223683	0.0611218	0.0944738	0.185399	-0.270148	0.0861856
Vps13c	837	0.000157203	0.000572982	0.0876939	0.0322197	0.0924806	0.129825
Stmn2	838	0.0116864	0.0335598	0.0738893	0.0807656	0.0591205	0.0812558
Mafg	839	0.000314819	0.00111198	0.256163	0.172723	0.235627	0.0841526
Setbp1	840	8.55423e-05	0.000320712	0.104469	-0.0482888	0.101532	0.104819
Rgs12	841	2.48639e-06	1.09539e-05	0.0992356	0.0936085	0.165457	0.0736679
Lrrc8a	841	1.06567e-05	4.41534e-05	0.187983	0.0311409	0.16589	0.169634
Ctdsp2	843	2.70726e-06	1.19034e-05	0.237912	0.0159402	0.222952	0.217393
Slc25a36	843	0.00477799	0.0144181	0.080877	0.0810642	0.0925826	0.0469823
Cpxm2	844	2.72435e-06	1.19667e-05	0.23778	-0.187449	0.250618	0.132425
Nin	845	2.76415e-06	1.21296e-05	0.135126	0.0926827	0.174429	0.143667
Spag9	845	2.86164e-06	1.25081e-05	0.343158	-0.0589934	0.0810264	0.0880044
Fes	845	0.000106762	0.000396596	0.092231	0.063967	0.0540205	0.0905721
Ddx50	846	2.82304e-06	1.23637e-05	0.217138	-0.752819	0.336644	-0.13987
Ttc19	846	2.90268e-06	1.2675e-05	0.28974	-0.0357441	0.283195	0.105096
Ddit4	846	0.000280191	0.000995987	-0.237846	0.157486	0.246272	-0.102376
Plce1	847	0.0263666	0.0712602	0.0353247	0.0892789	-0.00368109	0.0378802
Nlgn2	848	2.9635e-06	1.2928e-05	0.12941	0.0188493	0.169793	0.0938909
Cog3	850	0.0269411	0.0726367	0.00837992	0.048164	0.0112481	-0.000580258
Sh3pxd2a	851	3.57899e-06	1.54916e-05	0.200601	-0.0207313	0.184694	0.163212
Neu2	852	0.0253877	0.0687396	0.0339972	0.0396862	0.034519	0.0294283
Nfatc4	854	3.39003e-06	1.47022e-05	0.127552	-0.0524596	0.137796	0.0951433
Diaph2	854	3.92346e-06	1.69496e-05	0.179787	0.0679992	0.14822	0.138602
Zfp334	854	0.00392481	0.0120145	0.0461175	0.0416798	0.0526796	0.0428886
Efemp1	855	0.0140932	0.0400325	0.0707162	0.0881054	0.0875777	0.0689293
Wnt5a	856	3.99817e-06	1.72557e-05	0.144564	-0.0831959	0.152489	0.110681
Gpr137	856	0.00038863	0.00135443	0.0648394	0.0729569	0.101148	0.0815038
Soat1	858	2.98581e-05	0.000117479	0.115765	0.0888825	0.149925	0.0950512
Dzip1l	859	4.31325e-06	1.85795e-05	0.117961	0.0769243	0.141429	0.0758199
Ccrl2	859	0.000877407	0.00292076	0.116509	0.092127	0.0189248	0.11843
Eps15l1	860	0.0285996	0.0768753	-0.0629871	0.0702418	0.0314524	-0.0580425
Dpp7	861	4.11366e-05	0.00016002	0.161296	0.0906092	0.0477071	0.149269
Fli1	862	4.655e-06	2.00129e-05	0.0885436	-0.337242	0.096559	0.0664321
Plcd1	862	4.75951e-06	2.04228e-05	0.124283	0.00302669	0.115392	0.0848031
Sipa1l2	862	0.000142658	0.000523825	0.122096	0.026459	0.109528	0.115992
Sh3bp5	863	0.0204973	0.0564595	0.0389094	0.0462245	0.0526006	0.0320355
Prkar1b	864	2.8567e-06	1.24987e-05	0.129678	-0.00169002	0.129021	0.0731386
Zfp451	865	5.19979e-06	2.22477e-05	0.262525	0.0454522	0.249621	0.102635
Rufy3	866	7.60004e-06	3.20555e-05	0.151891	0.101611	0.185175	0.100895
Dag1	867	5.48645e-06	2.34068e-05	0.0631512	-0.363889	0.262825	0.064732
Efnb2	867	0.000351027	0.00123242	0.130886	0.0933866	0.0910839	0.0905087
Olfr56	868	0.0307969	0.0825825	0.0281173	0.0302918	0.0142685	0.0143146
Faah	870	0.0166043	0.0464545	0.0385232	0.040425	0.000504379	0.0350461
Igtp	872	0.0323924	0.0864443	0.074342	0.086743	-0.129929	0.0524938
Mid1	873	0.000102526	0.000381815	0.0946057	0.0586546	0.0969976	0.0560973
Chm	874	0.0331478	0.0883546	0.0408739	0.0772644	0.030694	0.0631377
Tmem158	875	6.61165e-06	2.80193e-05	0.0217216	0.00925367	0.193934	-0.100591
Herc2	876	0.000376205	0.00131524	0.0904997	0.052174	0.104772	0.148267
Cdc42bpb	876	0.00436651	0.0132754	0.121171	0.106786	0.0515054	0.0973927
Dram2	877	0.000377536	0.00131886	0.0753942	0.0407117	0.00247297	0.132813
Clcn7	877	0.0323123	0.0863341	0.0483796	0.0603673	0.0468454	0.0533393
Grcc10	878	7.63104e-06	3.21558e-05	0.234887	-0.205485	0.221252	0.129109
Wipf1	878	8.46891e-06	3.5485e-05	0.104077	-0.0350466	0.110638	0.0921935
Cept1	878	0.0339821	0.090362	0.0369518	0.0957083	-0.0230496	0.0674081
Cyp1b1	879	0.000176888	0.000642102	0.140059	0.0695896	0.0875651	0.122775
Abcc1	879	0.000294167	0.001044	0.135478	-0.00755608	0.124459	0.150803
Hist2h3c1	880	0.0345904	0.091815	0.0025169	0.0273649	-0.00140986	0.00161401
Ddit3	881	8.11987e-06	3.4151e-05	0.347378	-0.243639	0.280963	0.0922317
R3hdm2	881	8.41507e-06	3.52926e-05	0.203671	0.0963633	0.14995	0.173741
Pde4a	882	8.38228e-06	3.52214e-05	0.189632	-0.245272	0.123764	0.140459
Arl5c	882	6.40494e-05	0.000243617	0.0829404	0.00482975	0.1012	0.0915863
Megf8	882	0.00210018	0.00666255	0.086981	0.0738284	0.100248	0.0737873
Panx1	883	8.40994e-06	3.52926e-05	-0.112173	-0.709358	0.218017	-0.099945
G6pc3	883	0.000410554	0.00142561	-0.00482184	0.00486824	0.106023	0.154721
Xylt1	884	8.57795e-06	3.58744e-05	0.157286	0.0657138	0.177171	0.0805329
Adam10	884	0.00218659	0.00690714	0.147357	0.117241	0.078557	0.122274
Tac1	885	8.73852e-06	3.64774e-05	0.287529	-0.605256	0.287203	0.209334
Atp9b	885	0.0113697	0.0327135	0.0834068	0.0723953	0.0587557	0.0574991
Bst2	886	0.0370321	0.0978877	-0.0840845	0.251888	-1.00233	-0.0385808
Ifnar1	887	0.000148426	0.000543212	0.109379	0.0897734	0.134967	0.142986
Iah1	888	9.44076e-06	3.92983e-05	0.159416	-0.110303	0.252483	0.0705171
Ndufaf2	888	0.000465	0.00160055	-0.0447391	0.0770157	0.0975281	0.15478
Arl6ip5	890	9.7138e-06	4.03971e-05	0.261052	-0.727417	0.36366	0.0532364
Ifit1	890	0.00471028	0.0142235	0.177649	0.157742	-0.0289881	0.135906
Acvrl1	891	9.99122e-06	4.14347e-05	0.153238	-0.0815097	0.0559582	0.0799516
Lifr	891	1.06926e-05	4.4261e-05	0.116055	0.047711	0.148167	0.0306176
Nfkb2	891	0.000695945	0.00233421	0.180691	0.119445	0.0535935	0.122475
Nsg1	892	1.07162e-05	4.43177e-05	0.0136717	0.0555241	0.109429	0.0351029
Stc2	893	0.0039856	0.0121755	0.0474615	0.0790633	-0.0147435	0.0975533
Slc41a3	894	0.00019415	0.000703044	0.100459	0.0357645	0.0941922	0.0972453
Myo1e	895	1.08743e-05	4.48879e-05	0.228677	-0.0321731	0.0820526	0.143719
Dsp	895	0.0397338	0.10441	-0.209046	0.0630654	-0.0899785	-0.241623
Aes	896	0.00056252	0.00191549	-0.306241	-0.251884	0.042005	0.291042
Lsmem1	896	0.0401049	0.105199	0.0200073	0.0342066	0.0069388	0.0279833
Pam	897	1.16784e-05	4.80294e-05	0.229678	-0.118495	0.114065	0.124881
Ramp2	898	1.29967e-05	5.31078e-05	0.0974619	-0.22464	0.160251	0.139553
Duox1	898	0.0206441	0.0567625	0.0354972	0.0405544	0.0215097	0.0430801
Col14a1	899	1.36908e-05	5.58415e-05	0.0794215	-1.222	0.169725	-0.0971963
Upp1	899	0.0213948	0.0586414	0.0570569	0.060683	0.058305	0.0538957
Osbpl8	900	1.2052e-05	4.94744e-05	0.175085	0.0379199	0.164266	0.110756
Rab8b	900	1.3881e-05	5.65653e-05	0.143668	0.0178706	0.186869	0.051731
Plk3	900	0.04364	0.113271	0.0568542	0.0966516	-0.0430583	0.0218359
Ifi44	901	0.0437852	0.113581	0.0117933	0.0600768	-0.169433	0.037515
Ogn	902	1.28951e-05	5.28027e-05	0.131245	-0.349801	0.129682	0.116587
Pcnx	903	1.49532e-05	6.06571e-05	0.173138	0.0902133	0.197927	0.147918
Fam96a	903	0.0442269	0.114661	-0.293264	0.102035	0.0318488	0.0754081
Phf11d	904	0.0443648	0.114951	0.0340144	0.0979464	-0.231059	0.033434
Myo9a	905	1.62258e-05	6.55209e-05	0.145094	0.0796853	0.153186	0.106974
Nrd1	905	0.000611564	0.00206827	0.116918	0.0204008	0.0977701	0.185125
Rnf113a2	906	0.045278	0.116977	-0.00357079	0.0436611	-0.0479084	-0.0102104
Ctgf	907	1.29434e-05	5.29385e-05	0.323297	-0.497893	0.079545	0.139384
Ddx24	908	0.0455787	0.117685	-0.305031	0.153853	-0.173699	-0.239594
Gsdmd	909	0.000221073	0.000794081	0.0884511	-0.0328128	0.0906206	0.0875941
Spaar	910	0.0465671	0.120098	0.0237499	0.0337675	0.0119619	0.00965359
Itga7	912	1.93704e-05	7.76559e-05	0.136029	0.0676887	0.130791	0.115753
Cdk4	913	2.14693e-05	8.58388e-05	-0.76991	-0.160027	0.341051	0.116626
Phlpp2	913	0.00754121	0.0222146	0.0712954	0.0602997	0.0616505	0.0405037
Nectin1	914	0.00534207	0.0160334	0.0412073	0.0668655	0.0874687	-0.041272
Itpk1	915	0.0275828	0.074232	-0.0318554	0.064721	0.0603835	-0.0216266
Fndc4	916	2.3006e-05	9.15719e-05	0.0652815	-0.0504449	0.13805	0.00285044
Ltbp2	916	5.8981e-05	0.000224916	0.17152	0.110686	0.141183	0.141583
Irs2	917	1.60223e-05	6.47582e-05	0.205794	0.0672876	0.150172	0.0535017
Pltp	918	2.37697e-05	9.44427e-05	-0.0935805	-0.309862	0.175563	-0.612775
Vamp2	918	0.0491904	0.126352	0.069446	0.0802507	0.032345	0.0484681
Gm38399	919	1.65421e-05	6.67377e-05	0.0914756	0.0359971	0.0944716	0.0687075
Chst2	920	2.43783e-05	9.67745e-05	0.0662173	0.0151735	0.115485	0.0692024
Prdm1	921	0.00236656	0.00743347	0.0827708	0.0651624	0.0768878	0.0487673
Hdac7	922	0.000131876	0.000485033	0.116312	-0.0926428	0.0549668	0.108405
Utp15	922	0.0516728	0.132271	-0.0173399	0.0551028	0.0462036	0.041782
Enah	923	2.77282e-05	0.000109293	0.172522	0.118382	0.215166	0.141689
Gas2l3	923	0.000983151	0.00325331	0.0413345	0.0111379	0.0667095	0.0746358
Ggcx	924	0.000167921	0.000611045	0.118094	0.0696645	0.107754	0.0767242
Serpina3f	924	0.000237719	0.000849761	0.0937133	0.0468968	0.0922085	0.0893952
Card19	926	2.01681e-05	8.07813e-05	0.264666	-0.379431	0.00410576	0.177652
Ptprs	926	2.70818e-05	0.00010684	0.0847582	0.0708988	0.273696	0.0622983
Mdfic	927	0.00107802	0.00354353	0.0972268	-0.0230898	0.0869122	0.11165
Phf1	927	0.0274552	0.0739332	0.0656821	0.0654379	-0.0141303	-0.0146242
Nrp2	929	2.29565e-05	9.14564e-05	0.196656	0.0119688	0.139129	0.111369
Gbp3	929	0.028451	0.0765222	0.0862837	0.0850094	-0.0504445	0.0650326
2200002D01Rik	930	2.30525e-05	9.1675e-05	0.167994	0.00693642	-0.106829	0.127925
Gm1673	931	3.03594e-05	0.000119137	0.109219	-0.0663702	0.149852	0.0585783
Dusp3	932	0.00104063	0.00342318	0.121818	-0.0421269	0.0599039	0.128198
Il13ra1	932	0.0583981	0.148377	-0.0386542	0.0944631	0.0629896	-0.229618
Ankrd50	933	0.000280643	0.000996797	0.132661	0.0782864	0.107466	0.115102
Alkbh1	934	3.66347e-05	0.000143007	0.151609	-0.0372291	0.281856	0.0194357
Slc43a3	935	0.00122891	0.00401288	-0.0662933	0.0500093	0.0653214	0.0999128
Csrnp1	937	2.66226e-05	0.000105308	0.235765	0.0641371	0.0492349	-0.0314157
Susd2	938	0.000206959	0.000747603	0.0882475	0.0540044	0.0820031	0.0794247
Fmo2	939	0.000518079	0.00177093	0.125743	0.0810833	-0.163087	0.0937755
Rab20	940	2.98841e-05	0.000117479	0.272548	-0.0719583	0.26005	0.116318
Slc1a5	940	4.38081e-05	0.000169966	0.108545	-0.124345	0.222338	0.0651025
1500011K16Rik	940	0.0620006	0.157082	-0.212551	0.0865128	-0.100217	-0.0344183
Cbr3	941	4.42177e-05	0.000171406	0.0842436	0.0708551	0.163287	-0.0182149
Pon3	941	0.00156713	0.00506897	0.101291	0.0879619	0.0868397	0.125475
CT025619.1	943	4.50762e-05	0.000174261	0.057557	-0.178238	0.105776	0.048433
Cx3cl1	943	0.000688594	0.00231472	0.151822	0.101265	0.0437899	0.0788363
Sec11c	944	0.00135914	0.00441546	-0.225182	-0.00794593	-0.204509	0.196942
Sod2	944	0.0649667	0.164037	-0.106941	0.165201	0.136783	0.149055
Pink1	945	3.49591e-05	0.000136826	0.197943	-0.142083	-0.0105506	0.104029
Tsc22d2	946	4.24374e-05	0.000164935	0.230198	0.113852	0.23648	0.0409981
Nuak1	947	3.67483e-05	0.000143325	0.10168	0.0138215	0.0942601	0.0674287
Entpd1	947	0.00114634	0.00375978	0.0753411	0.0593013	0.04793	0.0695864
Sacs	948	5.95804e-05	0.000227007	0.0741834	0.000229827	0.101546	0.0665044
Psmb9	948	0.0660585	0.166417	-0.301968	0.0775997	-0.354588	-0.0424624
Prkx	949	4.01127e-05	0.00015631	0.19223	0.0280987	0.0675886	0.0779913
Dlk1	949	0.0168933	0.0472333	-0.414192	0.136205	0.148825	-0.259546
Bc1	951	6.86441e-05	0.000260427	0.0750438	-0.408316	0.179457	-0.00152688
Fcho2	951	0.00281079	0.00878545	0.12598	0.0887282	0.0588545	0.108336
Mettl21a	952	0.000476537	0.00163646	0.0500841	0.0609206	0.0949394	0.0714166
Hsd17b11	952	0.000738169	0.00247203	0.121827	-0.00394094	0.00736851	0.12014
Cyp2d22	953	4.61533e-05	0.000178134	0.120664	0.0605183	-0.0140509	0.0514832
Tmtc4	954	0.0709453	0.177722	-0.0267503	0.039367	0.011084	0.0332963
Twist1	955	7.39026e-05	0.000278951	-0.184565	-0.848992	0.204641	-0.223165
Rdh5	955	0.000109074	0.000404172	0.127137	-0.0971924	0.117239	0.112236
Klf2	957	7.65258e-05	0.000288364	0.222039	0.0979987	0.43866	-0.20849
Scrn3	957	0.0717936	0.179746	0.0100608	0.0381197	0.0111401	0.0286722
Cpne2	959	7.89783e-05	0.000297102	0.123801	0.0206377	0.138828	0.0809441
Snn	960	0.00164562	0.00530745	0.0593097	0.0406993	0.0608499	0.0649431
Slc12a2	960	0.0139433	0.0396319	0.142462	0.119157	-0.140828	0.128284
Tspan18	961	8.35698e-05	0.00031358	0.0403989	-0.124282	0.110253	-0.0459456
Olfm2	961	9.34854e-05	0.00034873	0.111029	-0.0533301	0.104428	0.097931
Lst1	962	7.91748e-05	0.00029759	0.1028	0.0626264	0.0852281	0.0719568
Dock4	963	4.73895e-05	0.000182589	0.145045	0.0766243	0.139606	0.0994273
Fbxo6	963	0.0447176	0.115663	0.0375445	0.0736502	-0.140617	0.0681336
Cd164	964	0.00179718	0.00577536	0.148493	-0.116632	0.0336795	0.199944
Prc1	964	0.0736438	0.183862	-0.3872	0.060264	-0.027337	-0.0394209
Bcam	965	0.074143	0.184901	-0.285126	0.0965994	-0.112674	-0.540076
Slc16a1	967	8.93511e-05	0.000334148	0.0216203	0.0252942	0.181342	-0.162649
Bcat1	967	0.00030395	0.00107615	0.083149	0.0194764	0.104216	0.0956004
Sgsh	967	0.00415665	0.0126719	0.0508124	0.0404881	0.0467649	0.0571144
Ube2c	968	0.0758773	0.188514	-0.83685	0.0984814	0.00714721	0.0675635
Nbeal1	969	7.00548e-05	0.000265326	0.236859	-0.0442447	-0.0492893	0.00809768
Lipg	969	0.00123248	0.0040216	0.0562462	0.0462107	0.0708904	0.0634557
Ankrd27	970	0.0383122	0.101056	0.0397923	0.0518668	0.0305441	0.057565
Nrgn	971	0.000956172	0.0031711	0.0724799	-0.337659	0.0942929	0.0918056
Nrarp	972	0.00284398	0.00887051	0.00849345	0.0599584	0.0246379	0.0848579
Myo6	973	7.61614e-05	0.000287234	0.142351	0.00173386	-0.055835	0.0675862
Flrt2	973	0.000179026	0.000649332	0.0697526	-0.0503328	0.0789455	0.0681079
Osbpl11	973	0.000435447	0.00150581	0.109363	0.0676545	0.0670968	0.0436281
Fchsd1	974	0.0776563	0.19237	-0.0133802	0.0213999	-0.0374543	-0.0108615
Zc3h7b	975	0.00222825	0.00702877	0.0149521	0.0176291	0.0915628	0.11034
Prdm4	976	0.00069575	0.00233421	0.0985157	0.0628021	0.0952928	0.0437827
Marveld1	977	8.94612e-05	0.000334279	0.13582	0.0714121	0.132181	0.117598
Sipa1l3	977	0.0808866	0.199484	0.0261634	0.0418603	0.0161225	0.00724068
Pik3c2a	978	0.0199937	0.0551405	0.0987571	0.0831847	0.0173157	0.0627576
Tk1	979	0.0817901	0.201378	-0.4544	0.0593775	0.0370926	0.0472547
Pvr	980	9.24442e-05	0.000345135	0.229413	0.0676375	0.147819	0.19067
Gm12216	982	0.0843501	0.207567	0.0289403	0.0427244	-0.0123802	0.0221994
Gipc1	983	0.0445251	0.115232	-0.165998	0.0766351	0.00292336	0.0682183
Usp8	984	0.00198458	0.00632284	0.126899	0.0916305	0.132975	0.109266
Stom	985	0.000143416	0.000526173	0.0836469	0.0622282	0.104435	0.0689991
Dstn	985	0.0851516	0.209192	-0.315425	0.170726	-0.53481	-0.383803
Slc39a1	986	9.91354e-05	0.000369497	0.166906	-0.00851317	0.13814	0.127544
Plekhm2	987	0.000103976	0.000386892	0.160127	0.0172529	0.0935114	0.0771457
Qsox1	989	0.00010616	0.000394689	0.218072	-0.00977274	-0.00329167	0.172289
Gm28875	989	0.00221875	0.00700376	0.0573227	0.0216829	0.0622841	0.0645677
C2cd2l	990	0.0148495	0.041877	0.0847538	0.0699979	0.0728065	0.0731869
Rgl2	993	0.0898026	0.21989	0.0378969	0.0646699	-0.0474452	0.0428994
Ccdc74a	994	0.000175859	0.000638886	0.0851134	0.0529762	0.101604	0.085909
4932438A13Rik	994	0.000212617	0.000765557	0.184096	0.10377	0.143104	0.0394417
Aff1	995	0.000118459	0.000438218	0.125413	0.0620385	0.0907365	0.0715601
Afap1	996	0.000121504	0.000449111	0.165457	0.0416834	0.0850311	0.0648082
Sec23b	996	0.0938219	0.228601	0.0120835	0.0693584	-0.019959	0.0346966
Arhgap22	997	0.000180977	0.000655877	0.0885524	-0.0754673	0.0930268	0.0689863
Acaa2	997	0.0948573	0.230871	-0.383268	0.100914	-0.325142	0.0195365
Meis1	998	0.0478546	0.123205	0.0353955	0.0328467	0.0273135	0.0226553
Chpt1	999	0.00321926	0.00997119	0.0361158	-0.00598907	-0.108035	0.104735
Lmbr1	1000	0.0959652	0.233313	0.0136241	0.0254076	-0.0212256	0.0161022
Gnl3	1002	0.000206277	0.000746352	-0.367037	-0.755366	0.330489	-0.487218
Fam174b	1002	0.00343381	0.0106062	0.0575226	0.00470374	0.0192874	0.0636257
Ccnl1	1003	0.000150074	0.000548793	0.333302	-0.0413924	0.0807412	-0.393329
Hoxb4	1003	0.0967002	0.234843	-0.0275014	0.0350459	-0.00973239	-0.0497695
Nfil3	1004	0.000215036	0.000773642	0.0854109	0.0135498	0.171827	-0.110774
Airn	1004	0.000233974	0.000837718	0.125652	0.0722974	0.0785494	0.075941
Appl2	1004	0.00355195	0.0109483	0.0381777	-0.0637494	-0.057603	0.0677762
Hmmr	1005	0.00374072	0.0114984	-0.30248	0.0451803	0.048949	0.0678242
Usp25	1006	0.0186723	0.0518172	0.0934828	0.0942364	0.0633758	0.116377
Klf3	1007	0.00128287	0.00417684	0.176536	0.125019	0.184824	0.183546
Rhou	1007	0.00422497	0.0128538	0.0975301	0.0663376	-0.0759107	0.0802702
Mapre3	1008	0.000172712	0.000627967	0.107285	-0.073024	0.0233707	-0.0157063
Bdh2	1008	0.00124093	0.00404323	0.0630691	-0.0147004	0.0642191	0.0616891
Wdr11	1009	0.0653412	0.164796	-0.00262474	0.0407226	0.0168662	0.0348592
Ccdc141	1010	0.101503	0.244375	0.00795378	0.0467803	-0.125415	0.0179017
Meox2	1011	0.00024005	0.000857404	0.0900136	-0.194517	0.0946897	0.0582779
Robo1	1012	0.000578339	0.00196618	0.0846019	0.0560268	0.0995711	0.0401179
Dmpk	1013	0.000868806	0.00289429	0.0716356	0.0279067	0.0801106	0.0758406
Smg1	1013	0.0176416	0.049202	0.118422	0.099782	0.0590035	0.00800871
Pde6d	1016	0.0617532	0.156544	-0.0481885	0.0901229	0.0495686	0.0829635
Apex2	1018	0.00201828	0.00642101	0.0673713	0.0527105	0.0847684	0.083154
Serpinb9	1021	0.00198139	0.0063172	0.0720903	0.0536611	0.0840059	0.0809318
Plekho1	1022	0.000295442	0.00104769	0.0770547	0.0466675	0.0908847	0.0604947
Car11	1022	0.0768795	0.190658	0.023298	0.0272377	0.014208	0.0247306
Cenpa	1023	0.076309	0.189454	-0.675451	0.0806864	0.0739656	0.0666161
Thsd4	1024	0.00528809	0.0158928	0.0311989	0.0223198	0.0260766	0.0363463
Piga	1024	0.0560158	0.142895	0.0244433	0.0558759	0.0640064	0.00578907
Mafk	1025	0.000233271	0.000835872	0.204813	0.0802182	0.038475	0.0563752
Adcy7	1025	0.000334353	0.0011791	0.0943273	0.00899435	0.102724	0.053014
Tns2	1026	0.00024089	0.000859714	0.10733	-0.158593	0.109547	0.0735128
Peli2	1027	0.000353834	0.00123995	0.0465868	-0.0696337	0.0885987	0.0431258
Nfkbia	1028	0.000236218	0.000845071	0.447027	-0.0283241	0.100669	0.0134251
Nt5dc3	1028	0.00037547	0.0013137	0.107966	-0.137319	0.123312	0.0820216
Traf5	1029	0.00037971	0.00132541	0.0533161	-0.0212977	0.0689622	0.0428339
Ttc37	1029	0.116545	0.276701	-0.0451604	0.0458098	0.0397868	0.0234881
Notch2	1030	0.00287352	0.0089501	0.0942714	-0.0369515	0.0519404	0.0925025
Sowahc	1031	0.118412	0.280236	0.031644	0.0537859	0.0047789	0.0432316
Cog7	1032	0.11861	0.280512	-0.00774039	0.0428958	0.000193301	0.0257543
Col4a3bp	1033	0.118654	0.280512	0.00771569	0.0520258	-0.0474531	-0.0113589
Jmjd1c	1034	0.000276392	0.000983266	0.203927	-0.523924	0.163852	-0.339106
1500015O10Rik	1035	0.000419063	0.00145366	0.00520045	-1.64418	0.22219	-0.00353154
Egfl7	1036	0.00042952	0.00148762	0.0449267	0.0657216	0.141759	0.0910306
Rab34	1037	0.000430178	0.00148874	0.0826555	-0.106631	0.212794	-0.0224593
Bcar1	1037	0.00309737	0.00962042	0.137029	0.0876785	0.0837964	0.0599366
Adgrg6	1038	0.00677636	0.0200811	0.0472538	0.0184778	0.0180367	0.0647657
Wnk1	1039	0.000440448	0.00152192	0.0769841	-0.575686	0.256278	-0.029737
Pim1	1040	0.00030923	0.00109397	0.27446	-0.0737744	0.00596163	-0.268589
Jmjd6	1040	0.000443418	0.00153099	0.0946711	-0.0562287	0.217853	0.00617983
Tbx2	1041	0.000446308	0.00153978	0.0605457	-0.0445577	0.0853728	0.0373959
Huwe1	1041	0.0568202	0.144781	0.0953396	0.115308	0.0987972	0.0916073
Acer2	1042	0.121663	0.286865	-0.246703	0.0513018	-0.186734	-0.119203
Ppp1r12c	1043	0.000462833	0.00159432	0.0614156	0.00271808	0.143389	0.0638243
Ptprj	1043	0.00708473	0.0209392	0.0606925	0.0632554	0.0371661	0.0980595
Sfrp2	1044	0.00465067	0.0140625	0.128851	0.057765	0.115271	0.128279
Enpp3	1044	0.124627	0.293076	-0.108243	0.0436692	-0.30116	-0.0535082
Zfp516	1045	0.000321588	0.00113499	0.120542	0.0586982	0.0753581	0.0727502
Arhgef40	1046	0.000473732	0.00162934	0.0776807	-0.109511	0.134081	0.00746782
Unc93b1	1048	0.00034295	0.00120751	0.128476	-0.0395484	0.0213699	0.0840602
Itpkb	1050	0.00035141	0.00123242	0.120148	-0.0172337	0.106324	0.0545239
Sept1	1050	0.019617	0.0542904	0.0658347	0.0595611	0.0770959	0.0688737
Ctif	1051	0.00704546	0.020837	0.0475014	0.0337692	0.0333561	0.0339241
Dennd6a	1052	0.007827	0.0229957	0.0561069	0.00172394	0.025589	0.0764091
Pfdn6	1052	0.13183	0.308598	-0.983073	0.0958791	-0.306738	-0.227934
Syap1	1053	0.000381072	0.00132913	0.14831	0.0554161	0.0894242	0.110075
Gm15706	1053	0.0853106	0.209467	0.00441211	0.0284436	0.0225966	0.0242553
Kank2	1055	0.000401247	0.00139621	0.139584	-0.459275	0.13192	-0.0387574
Nptx2	1056	0.000779749	0.00260736	0.0510987	0.00239405	0.0689346	0.0528498
Nr1h2	1056	0.132455	0.309851	0.0190006	0.093707	0.0324306	0.0225341
Saa3	1057	0.0444143	0.115012	0.0678388	0.0717481	0.0782302	0.0783196
Arhgap24	1058	0.000350912	0.00123242	0.0969821	0.0256912	0.0986504	0.0379843
Ccdc88a	1058	0.000578967	0.00196618	-0.0543207	-0.114914	0.216361	0.0154107
Nme1	1058	0.0181989	0.0506295	-1.23744	0.151477	0.23416	0.173807
Klc1	1059	0.0104253	0.0300934	0.0503622	0.0911371	0.122869	0.0790239
Slc38a9	1060	0.135795	0.316998	0.000882671	0.0236153	-0.00392025	-0.00247659
Slc36a1	1061	0.0231535	0.0630352	0.0303744	0.032632	0.0416378	0.0325311
Etv5	1062	0.000606341	0.00205216	0.0100787	-0.0643765	0.112895	0.0497612
Dst	1065	0.000613823	0.00207433	0.145397	-0.275721	0.180481	-0.279193
Parp4	1065	0.139275	0.324441	0.0257373	0.0419324	0.0126587	0.00863432
Prdm5	1066	0.000654954	0.0022083	0.0411972	-0.0801846	0.0728523	0.0362902
Scube1	1066	0.00508976	0.0153174	0.053248	0.0360223	0.0392991	0.0529465
Rbp7	1066	0.139817	0.325532	-0.202243	0.0788851	-0.018247	0.0119663
4931406P16Rik	1068	0.000491363	0.00168608	0.131738	0.0372867	0.0765691	0.0921769
Trim26	1068	0.142759	0.331516	0.0423081	0.0563084	-0.0223518	0.00755647
Gba	1070	0.00050639	0.00173364	0.156161	0.0150113	0.110967	0.118514
Ldlrad4	1070	0.00928082	0.0270175	0.117236	0.0809654	0.052103	0.0612679
Mtmr10	1071	0.000513651	0.00175715	0.0967814	0.00925555	0.0848316	0.0434432
Fam8a1	1071	0.0148553	0.041877	0.0720555	0.0557265	0.0478976	0.0797961
Xrn1	1072	0.144334	0.33465	0.0291357	0.0554671	-0.0242004	0.0219102
Pde7b	1073	0.0114048	0.0327935	0.0354345	0.0184285	0.0283097	0.0376053
Actn4	1073	0.144798	0.335277	-0.604666	0.118271	-0.626609	-0.36435
Nfat5	1074	0.000524321	0.0017909	0.235992	0.0529613	0.177037	0.0105282
Sema6d	1074	0.000731484	0.00245149	0.09151	0.0527947	0.117155	0.0445317
AW112010	1074	0.0116444	0.0334608	0.0340724	0.0428878	-0.182275	0.0765604
Ovca2	1074	0.145664	0.337032	0.012386	0.0175335	0.00448063	-0.00164501
Eif4ebp1	1076	0.0122036	0.0348875	-0.463077	-0.0802313	0.134124	0.205627
Akirin1	1077	0.101424	0.244317	0.0750197	0.0913822	0.0107561	-0.238694
Tap2	1079	0.150076	0.346573	-0.147341	0.0547593	-0.358059	-0.113394
Itsn1	1080	0.00082155	0.00274302	0.0943343	0.049023	0.103399	0.0824636
Cenps	1080	0.050178	0.12874	-0.184453	0.0351821	0.0200141	0.0428591
Nr3c2	1081	0.0502274	0.128793	0.0222401	0.0213471	0.0104822	0.0262899
Pgam1	1083	0.000854006	0.00284711	-0.745124	0.0149992	0.287173	-0.175996
Atp9a	1083	0.152502	0.351213	-0.00168441	0.0674526	-0.125597	-0.00204734
[truncated: 2,899 more rows]

## Sheet: 4-LP-Inv
	Top	p.value	FDR	logFC.1	logFC.2	logFC.3	logFC.5
[truncated: 4,454 more rows]

[truncated: 1 more sheets: 5-Basal]
