# Supplementary material for: Single-cell RNA-sequencing reveals distinct patterns of cell state heterogeneity in mouse models of breast cancer
Source: eLife. 2020 Aug 25;9:e58810. doi: 10.7554/eLife.58810 (PMC7447441; doi:10.7554/eLife.58810)
Supplement: Figure 4—source data 2. [file elife-58810-fig4-data2.xlsx]

## Sheet: BRCA1_5clusters_GO
	GO.ID	Term	Annotated	Significant	Expected	Fisher.classic	Clusters
1	GO:0002009	morphogenesis of an epithelium	225	7	2.54	0.00023	5
2	GO:0043062	extracellular structure organization	170	10	1.92	0.00068	5
3	GO:0001942	hair follicle development	39	4	0.44	0.00088	5
4	GO:0007010	cytoskeleton organization	441	10	4.98	0.0011	5
5	GO:0015914	phospholipid transport	21	3	0.24	0.00156	5
6	GO:0010951	negative regulation of endopeptidase activity	62	4	0.7	0.00173	5
7	GO:0045773	positive regulation of axon extension	22	3	0.25	0.00179	5
8	GO:0022408	negative regulation of cell-cell adhesion	77	5	0.87	0.00239	5
9	GO:0030198	extracellular matrix organization	152	7	1.72	0.00321	5
10	GO:0030334	regulation of cell migration	401	11	4.53	0.00443	5
11	GO:0001558	regulation of cell growth	147	8	1.66	0.00852	5
12	GO:0030216	keratinocyte differentiation	39	3	0.44	0.00929	5
13	GO:0050866	negative regulation of cell activation	88	4	0.99	0.00992	5
55	GO:0010959	regulation of metal ion transport	134	4	1.55	0.00075	4
56	GO:0032652	regulation of interleukin-1 production	43	3	0.5	0.00125	4
57	GO:0048260	positive regulation of receptor-mediated endocytosis	20	3	0.23	0.00143	4
58	GO:0002237	response to molecule of bacterial origin	113	3	1.3	0.00192	4
59	GO:0002376	immune system process	749	15	8.64	0.00207	4
60	GO:0046635	positive regulation of alpha-beta T cell activation	24	3	0.28	0.00246	4
61	GO:0055072	iron ion homeostasis	24	3	0.28	0.00246	4
62	GO:1904019	epithelial cell apoptotic process	47	3	0.54	0.00258	4
63	GO:0042130	negative regulation of T cell proliferation	28	3	0.32	0.00386	4
64	GO:0042102	positive regulation of T cell proliferation	29	3	0.33	0.00427	4
65	GO:0002711	positive regulation of T cell mediated immunity	29	3	0.33	0.00427	4
66	GO:0035270	endocrine system development	32	3	0.37	0.00566	4
67	GO:0030216	keratinocyte differentiation	39	3	0.45	0.00985	4
106	GO:0002063	chondrocyte development	25	4	0.29	0.00018	3
107	GO:0010951	negative regulation of endopeptidase activity	62	5	0.73	0.00072	3
108	GO:0003417	growth plate cartilage development	20	3	0.24	0.00152	3
109	GO:0060351	cartilage development involved in endochondral bone morphogenesis	26	5	0.31	0.00176	3
110	GO:0032963	collagen metabolic process	67	8	0.79	0.00222	3
111	GO:0048729	tissue morphogenesis	263	6	3.1	0.00227	3
112	GO:0051291	protein heterooligomerization	61	4	0.72	0.00542	3
113	GO:0043588	skin development	102	5	1.2	0.00651	3
114	GO:0034097	response to cytokine	313	6	3.69	0.00664	3
153	GO:0007613	memory	47	4	0.54	0.0019	2
154	GO:0016525	negative regulation of angiogenesis	47	4	0.54	0.0019	2
155	GO:0044265	cellular macromolecule catabolic process	263	4	3.03	0.0036	2
156	GO:0019058	viral life cycle	69	3	0.8	0.0055	2
201	GO:0009141	nucleoside triphosphate metabolic process	74	6	0.78	0.00055	1
202	GO:0009165	nucleotide biosynthetic process	64	5	0.68	0.00143	1
203	GO:0000398	mRNA splicing, via spliceosome	51	4	0.54	0.0019	1
204	GO:0006364	rRNA processing	31	3	0.33	0.00404	1
205	GO:0009132	nucleoside diphosphate metabolic process	35	4	0.37	0.00994	1
