# Supplementary material for: Single-cell RNA-sequencing reveals distinct patterns of cell state heterogeneity in mouse models of breast cancer
Source: eLife. 2020 Aug 25;9:e58810. doi: 10.7554/eLife.58810 (PMC7447441; doi:10.7554/eLife.58810)
Supplement: Figure 4—source data 3. [file elife-58810-fig4-data3.xlsx]

## Sheet: 1-LP INV
	Top	p.value	FDR	logFC.2	logFC.3
Itm2b	1	1.47029e-204	4.86961e-201	1.09685	0.784608
Mfge8	1	4.22397e-97	6.08251e-95	0.901473	1.22561
Ifi202b	2	4.15968e-198	6.88844e-195	1.40489	0.640509
1500015O10Rik	2	6.83646e-95	9.05694e-93	1.17421	1.22439
Cyr61	3	1.98763e-173	2.19434e-170	1.83124	0.694637
Csf3	3	3.5194e-154	1.66518e-151	2.11239	1.76979
Lgals3	4	1.43108e-166	1.18494e-163	1.37455	0.753344
Pttg1ip	5	4.33537e-166	2.87175e-163	0.970186	0.48421
Cp	5	5.34373e-127	1.47487e-124	0.997242	0.87059
Sqstm1	6	4.04343e-164	2.23197e-161	1.09599	0.572403
Spp1	6	1.48475e-81	1.53672e-79	1.4728	1.73371
Cst3	7	5.40166e-106	9.41594e-104	1.63617	1.41832
Tuba1c	8	6.01947e-153	2.49206e-150	0.97859	0.342951
Igfbp5	8	7.62949e-110	1.40383e-107	1.09814	1.08795
Map2k3	9	3.40693e-143	1.25375e-140	0.85044	0.190182
Wfdc3	9	1.37951e-63	9.13784e-62	0.757399	0.769072
Plet1	10	2.81874e-141	9.33565e-139	1.06349	0.47269
Ltf	10	4.2581e-42	1.58459e-40	0.37399	1.39427
Hbegf	11	2.05143e-135	6.17665e-133	1.18898	0.347074
Clu	12	2.17534e-77	2.05849e-75	0.785146	0.713541
Plaur	13	2.02565e-124	5.16074e-122	0.958199	0.201426
Lcn2	13	3.66315e-63	2.37889e-61	0.653247	0.660031
Tm4sf1	14	1.16636e-121	2.75927e-119	1.19131	0.598411
Mgst1	14	2.23361e-39	7.47244e-38	0.38315	0.630373
Tubb6	15	3.21966e-120	7.109e-118	0.879513	0.398431
Lmna	16	3.06719e-114	6.34907e-112	0.816004	0.441426
Timp2	16	1.05345e-55	6.01554e-54	0.534133	0.514426
Malat1	17	7.24529e-114	1.41155e-111	0.807763	0.145628
Rbp1	17	9.12076e-36	2.62678e-34	0.383958	0.781136
Lbp	18	2.6855e-31	6.58842e-30	0.347125	0.532869
Top1	20	7.17071e-102	1.18747e-99	0.722778	0.410995
Cbr2	20	4.47788e-37	1.31245e-35	0.416334	0.415667
Emp1	21	1.11611e-101	1.76026e-99	0.896773	0.252233
Ifitm3	21	1.84528e-29	4.186e-28	0.425295	0.637893
Ppp1r15a	22	3.27645e-98	4.93254e-96	0.712031	0.0828922
Dnaja1	22	8.80562e-42	3.20486e-40	0.469851	0.471876
Zc3h12a	23	8.53994e-96	1.17851e-93	0.692299	0.173762
Cryab	23	4.67553e-29	1.04631e-27	0.406964	0.562407
Slc35e4	25	2.29974e-91	2.92951e-89	0.628564	0.373304
Calr	25	1.97377e-28	4.32923e-27	-0.0684798	0.527155
Anxa1	26	1.02657e-88	1.25926e-86	0.936375	0.07784
Wnt7b	26	3.90455e-50	1.93013e-48	0.324715	0.286902
Arl6ip5	27	2.43277e-88	2.87762e-86	0.648952	0.404267
Lurap1l	27	2.07693e-27	4.43792e-26	0.0930557	0.381604
Ehd1	28	1.6353e-85	1.86762e-83	0.673081	0.220986
Ctsd	28	1.99623e-34	5.5559e-33	0.42836	0.462974
Cd44	29	8.91719e-84	9.84458e-82	0.608829	0.308249
Chil1	29	1.68199e-27	3.61736e-26	0.626949	0.682301
Bcl10	30	2.14274e-83	2.28928e-81	0.608872	0.154893
Wisp2	31	2.03688e-25	3.99179e-24	0.14281	0.198787
Ubb	32	3.09858e-35	8.77136e-34	0.406555	0.452214
Maff	33	6.34373e-80	6.3668e-78	0.703998	0.121869
Slpi	33	1.22774e-42	4.80101e-41	0.842828	0.762878
Anxa5	34	6.93517e-79	6.75567e-77	0.584118	0.106759
Pdia3	34	3.18225e-24	5.92112e-23	-0.0653404	0.419658
Nfkbia	36	6.43419e-77	5.91945e-75	0.969649	0.482682
Ramp1	37	1.01332e-73	9.07059e-72	0.572836	0.344258
Wnt5b	37	2.46248e-46	1.13274e-44	0.442603	0.382238
Ndrg1	38	7.0135e-73	6.11282e-71	0.71965	0.0212635
Hspa1a	38	2.14315e-26	4.40877e-25	0.444892	0.432684
Vps37b	39	3.14022e-72	2.66677e-70	0.558586	0.140009
Ahnak	40	5.64349e-72	4.67281e-70	0.599619	0.151762
Ets1	41	1.21176e-71	9.78867e-70	0.393471	0.210996
Gm8797	41	3.13353e-31	7.63107e-30	0.384534	0.414376
Fosl1	42	2.89681e-71	2.28434e-69	0.644438	-0.12251
Sphk1	42	2.13025e-48	9.93717e-47	0.353893	0.252378
Sertad2	43	1.05743e-70	8.14467e-69	0.553867	0.0307195
Tubb4b	43	1.6675e-51	8.62929e-50	0.556225	0.41634
Gch1	44	2.11211e-70	1.58984e-68	0.613754	0.256698
Lncpint	44	3.68521e-32	9.31711e-31	0.156495	0.141703
Ctsl	45	3.53512e-67	2.60185e-65	0.620902	0.114302
Pde4b	45	5.04089e-39	1.63681e-37	0.38716	0.334797
Ifi203	46	1.15085e-66	8.28609e-65	0.708409	0.254057
Ifi204	47	4.35047e-65	3.06569e-63	0.37519	0.245157
Slc2a1	48	5.39756e-64	3.72431e-62	0.645422	0.102868
Olfml3	48	1.39807e-19	2.18416e-18	0.148577	0.189769
Krt18	49	1.02041e-63	6.89716e-62	0.63399	-0.328698
Pdia6	50	2.14246e-19	3.31581e-18	-0.182835	0.390903
Cd14	51	2.06622e-26	4.30398e-25	0.532572	0.543946
Efhd2	52	1.99928e-61	1.27339e-59	0.616914	0.0390324
Mia	52	1.76905e-29	4.04075e-28	0.413545	0.399895
Sgms2	53	1.01061e-60	6.31536e-59	0.503137	0.227481
Irf7	53	1.38615e-40	4.83257e-39	0.571784	0.431029
Pim1	54	4.1345e-60	2.53583e-58	0.451992	0.0936651
Trf	54	4.19449e-31	1.01403e-29	0.567548	0.561914
Rnf19b	55	3.66457e-59	2.20674e-57	0.525039	0.284513
Krt8	56	3.14454e-58	1.85977e-56	0.583818	-0.236456
Mgp	56	1.23358e-16	1.71665e-15	0.157099	0.282766
F3	57	9.69483e-57	5.63321e-55	0.808606	-0.101919
Csn3	57	2.91651e-16	3.97509e-15	-0.00946741	0.60686
Spns3	58	6.66372e-17	9.51303e-16	0.170935	0.178627
Ier5	59	7.69586e-55	4.32011e-53	0.588374	0.013903
Dnajc3	59	3.89156e-16	5.23937e-15	0.0104461	0.246744
Vasn	60	6.57948e-54	3.63188e-52	0.359168	0.18756
Hspa5	60	4.33944e-16	5.79525e-15	0.167837	0.364654
Elf3	61	1.32462e-53	7.19204e-52	0.367339	0.15917
Nav2	61	9.78403e-18	1.44021e-16	0.206758	0.233435
Dusp5	62	1.0036e-52	5.36118e-51	0.661461	-0.0601246
Tmem59	63	1.69522e-52	8.912e-51	0.447532	0.137477
Plb1	64	1.59838e-15	2.02829e-14	0.0607673	0.123854
S100a13	65	1.2936e-50	6.59137e-49	0.46942	0.248683
Plekhb1	65	1.91386e-15	2.41016e-14	0.0359294	0.231803
Ndfip2	66	2.81268e-50	1.41145e-48	0.420428	0.114873
Hspd1	66	3.25597e-15	4.03681e-14	-0.0375934	0.270977
Cdc42ep3	67	3.56619e-21	6.05704e-20	0.383736	0.394157
Krt7	68	5.77784e-49	2.81415e-47	0.685189	-0.154159
Wwtr1	69	6.85459e-49	3.29021e-47	0.398732	0.0896497
Ppp1r2	70	7.57621e-49	3.58463e-47	0.529034	0.119037
Gas6	70	7.5026e-41	2.64347e-39	0.419187	0.289425
Lgals3bp	71	7.1248e-19	1.09247e-17	0.327099	0.343779
Nudt4	72	7.07915e-16	9.30403e-15	0.257459	0.294249
Tpst2	73	5.22231e-46	2.36935e-44	0.414331	0.198135
Hsp90b1	73	1.25682e-13	1.45545e-12	-0.328777	0.340863
Mat2a	74	5.77275e-46	2.58369e-44	0.440094	0.24038
Fth1	74	5.63002e-30	1.29491e-28	0.459737	0.379194
Ube2f	75	1.47158e-45	6.4985e-44	0.401322	0.228903
Fbln5	75	2.90233e-13	3.25848e-12	0.138095	0.169558
Fgfr1	76	9.62448e-45	4.19425e-43	0.364464	0.124755
Alkbh1	76	1.82085e-20	2.97077e-19	0.203897	0.197252
Mndal	77	1.37897e-44	5.93135e-43	0.367207	0.104438
Tuba4a	77	1.79382e-33	4.75292e-32	0.431339	0.305034
Fam107b	78	2.01257e-44	8.54569e-43	0.569574	0.00505878
Prr13	79	4.828e-44	2.02409e-42	0.491205	-0.07833
Ccnl1	80	5.24001e-44	2.16936e-42	0.40998	0.0149988
Gdpd2	80	3.96231e-21	6.6955e-20	0.102151	0.0839797
Gadd45b	81	6.93729e-44	2.83658e-42	0.362551	0.146151
Scn1b	81	1.3273e-12	1.43193e-11	0.0588708	0.0754563
Psmd8	82	2.41129e-43	9.73924e-42	0.443855	0.0622054
Slc15a2	82	1.54922e-17	2.27036e-16	0.22605	0.222313
Junb	83	3.1513e-43	1.25748e-41	0.635719	0.0107765
Asrgl1	83	2.25019e-12	2.39634e-11	0.115667	0.161302
Srsf7	84	2.59553e-12	2.73771e-11	0.202937	0.261015
Msn	85	1.23214e-42	4.80101e-41	0.406236	0.0324735
Cacybp	85	3.24561e-12	3.40173e-11	0.0696817	0.210645
Ezr	86	1.61869e-42	6.23385e-41	0.464962	0.175621
Tmem176a	86	1.80236e-14	2.15503e-13	0.214808	0.240052
Actr3	87	2.29767e-42	8.74698e-41	0.398964	-0.0938468
Ctsc	87	6.43054e-12	6.49327e-11	0.109704	0.180374
Rbms1	88	2.4745e-42	9.31313e-41	0.434377	-0.0549939
Ifi211	88	8.54942e-31	2.02255e-29	0.144914	0.10428
Sdc4	89	7.72505e-42	2.84282e-40	0.440927	0.173619
Pmepa1	89	9.68711e-12	9.63475e-11	0.164076	0.260871
Pla2g4a	90	6.40412e-12	6.48638e-11	0.104047	0.113731
Car2	91	1.84926e-41	6.61688e-40	0.727168	0.482798
Shisa5	91	1.24173e-30	2.91675e-29	0.337741	0.260899
Baiap2	92	1.858e-41	6.61688e-40	0.462025	0.211369
Sdf2l1	92	1.90361e-11	1.8489e-10	-0.246074	0.175568
Arpc1b	94	2.66713e-11	2.55305e-10	-0.211181	0.295687
Ifrd1	95	6.82206e-40	2.35361e-38	0.544654	0.0508876
Bsg	96	1.36476e-39	4.65988e-38	0.490127	0.126723
Alpl	96	2.7541e-15	3.4421e-14	0.191961	0.188628
Sfn	97	1.95134e-39	6.59474e-38	0.650837	0.144377
Nop56	97	2.88966e-11	2.75809e-10	0.139015	0.211193
S100a6	98	2.63558e-39	8.72902e-38	0.667415	0.34112
Fam3c	98	4.53538e-11	4.29176e-10	-0.1239	0.242773
Tnf	99	4.04801e-39	1.32743e-37	0.246112	0.123143
Scara5	99	8.71666e-13	9.46544e-12	0.0726979	0.0708124
Nop58	100	7.79878e-11	7.19486e-10	0.174027	0.211395
Denr	101	5.30447e-39	1.70567e-37	0.441707	-0.0333203
Tns4	101	9.48976e-11	8.65843e-10	0.0853588	0.101885
Cstb	102	5.89367e-39	1.87691e-37	0.417252	0.0880707
Tnfaip2	102	2.4063e-34	6.5865e-33	0.610062	0.352285
Smtn	103	9.51379e-39	3.00092e-37	0.294429	0.0422208
Rnd1	104	1.06631e-38	3.33171e-37	0.23504	0.149614
Apbb2	104	1.17992e-10	1.06773e-09	0.0699856	0.0821588
Palld	105	1.13488e-38	3.51284e-37	0.342591	0.00505307
Mafk	106	3.13566e-38	9.61603e-37	0.26902	0.0531442
Prag1	106	1.70101e-24	3.23778e-23	0.157651	0.118624
Mdfi	107	5.32381e-38	1.61766e-36	0.449274	0.265168
Nme1	107	1.74361e-10	1.55656e-09	-0.545878	0.245227
S100a16	108	1.34451e-37	4.0482e-36	0.424287	0.219159
Arl4a	108	1.83273e-10	1.62734e-09	-0.120613	0.182426
Nfkb1	109	2.04587e-37	6.10443e-36	0.341382	0.0989272
Ehd4	110	2.22386e-37	6.57626e-36	0.381561	0.136488
Ctsb	110	5.38463e-13	5.92488e-12	0.218334	0.251681
Ubc	112	9.02055e-37	2.62071e-35	0.586706	0.247564
Hs3st1	112	5.22784e-30	1.21081e-28	0.425595	0.300975
Epha2	113	1.29985e-35	3.71129e-34	0.291566	0.00832978
P2ry2	113	1.1247e-16	1.57173e-15	0.13631	0.126201
Slco3a1	114	1.18698e-11	1.17002e-10	0.0864177	0.0866795
Cx3cl1	115	1.40994e-34	3.9574e-33	0.257212	0.118719
Hspa1b	115	4.14299e-10	3.60147e-09	0.124632	0.139033
Hsph1	116	5.4688e-10	4.68028e-09	0.0911656	0.121999
Wipi2	117	2.15226e-34	5.94024e-33	0.314214	0.0303199
Srxn1	117	3.21002e-32	8.17815e-31	0.421665	0.274649
Gm14137	119	2.43666e-34	6.61494e-33	0.239836	0.082758
Actb	120	1.41471e-33	3.80936e-32	0.457748	-0.483696
Lrg1	120	9.68235e-10	7.9771e-09	0.156457	0.328285
Tgif1	121	1.56906e-33	4.1909e-32	0.393952	0.0956384
Gm14005	121	1.80271e-13	2.05175e-12	0.136992	0.135526
Socs3	122	9.25965e-18	1.36911e-16	0.185059	0.158218
Piezo1	123	1.88407e-33	4.95241e-32	0.293081	0.0700925
Prss23	123	1.19971e-09	9.811e-09	0.10054	0.107001
S100a10	124	2.03482e-33	5.30654e-32	0.418074	0.162947
Met	124	1.96083e-25	3.86564e-24	0.227021	0.159763
G3bp1	125	3.0356e-33	7.85461e-32	0.349222	0.164654
Slc25a5	125	2.00993e-09	1.61575e-08	-0.592678	0.244368
Dnajb1	126	1.03294e-32	2.65201e-31	0.357553	0.157256
Fxyd3	128	2.7055e-09	2.14369e-08	0.0824156	0.263587
Lrrfip1	129	2.31176e-31	5.80041e-30	0.364326	-0.0108451
Atp1a1	129	2.88693e-09	2.28198e-08	0.0945385	0.219521
Anxa3	130	2.42732e-31	6.04458e-30	0.41006	0.161909
Gm13889	130	2.96711e-09	2.33978e-08	0.100483	0.105635
Dusp1	131	2.49637e-31	6.17014e-30	0.367842	0.132513
Plekhf1	131	3.52072e-09	2.75015e-08	0.100103	0.114807
Celf2	132	1.09268e-23	1.99942e-22	0.246551	0.181906
Itgav	133	5.32854e-31	1.27885e-29	0.290478	0.181004
Fxyd6	134	6.65947e-13	7.27926e-12	0.102044	0.0949256
Cxcl1	135	6.1271e-31	1.45992e-29	0.642225	0.26743
Kifc3	135	1.52632e-21	2.64668e-20	0.156785	0.114848
Dnajb9	138	1.7182e-30	4.00751e-29	0.307523	0.169938
Tmem176b	138	1.50369e-08	1.1242e-07	0.148292	0.212265
Capg	139	1.70777e-08	1.26819e-07	0.074599	0.212744
Tmem255b	140	1.75173e-08	1.29792e-07	0.0208736	0.0242022
Fst	141	4.32026e-12	4.4437e-11	0.140136	0.113139
Dusp14	142	4.67417e-29	1.04631e-27	0.302804	0.159271
Ralb	143	5.45241e-29	1.21197e-27	0.297499	0.142563
Manf	143	2.34783e-08	1.73571e-07	-0.376118	0.250539
Lamp2	144	9.12758e-29	2.01537e-27	0.295445	0.103947
Dbi	144	2.54559e-08	1.87772e-07	-0.468075	0.261011
Lypd3	145	7.37533e-28	1.60705e-26	0.380473	-0.116052
Dcxr	145	2.16365e-11	2.08314e-10	0.237908	0.253259
Rasa2	146	9.25217e-28	2.00282e-26	0.202591	0.0783371
Adamts8	146	3.4049e-08	2.44621e-07	0.0128498	0.0299981
Plat	147	5.37651e-16	7.1228e-15	0.172546	0.144987
Camk2n1	148	3.81806e-27	8.10603e-26	0.146688	0.0852569
Marcksl1	148	3.08553e-09	2.42738e-08	0.229916	0.265241
Baz1a	149	1.3282e-26	2.80191e-25	0.323771	0.132496
Steap4	149	4.18781e-09	3.23311e-08	0.0626858	0.0614023
Cyth2	150	1.86557e-26	3.91062e-25	0.284226	0.0944248
Hmgn3	150	4.85709e-08	3.41543e-07	0.0281782	0.121409
Ppan	151	5.53834e-08	3.86168e-07	0.109664	0.143909
Mcl1	152	2.1155e-26	4.37909e-25	0.305867	0.183022
Pdia4	152	7.46917e-08	5.0901e-07	-0.0391269	0.140398
Dnajb11	153	7.78725e-08	5.28512e-07	-0.0668729	0.1425
Gnl3	154	9.58864e-15	1.16328e-13	0.214964	0.176897
Hmox1	155	3.71749e-26	7.6002e-25	0.46133	0.0933735
Slc39a14	155	1.62338e-15	2.05215e-14	0.142002	0.114256
Cebpb	156	4.13801e-26	8.40804e-25	0.511306	0.165161
Gm17501	156	4.56119e-08	3.22104e-07	0.0396258	0.0382964
Klf6	157	7.14871e-26	1.44369e-24	0.469249	-0.582653
Cdkn1a	158	7.41022e-26	1.48743e-24	0.497182	-0.401267
Klk1b1	158	1.10697e-07	7.39173e-07	0.0374485	0.0408301
Tacstd2	159	1.11272e-25	2.22008e-24	0.479797	0.012532
Gpd2	159	4.70582e-09	3.62458e-08	0.131804	0.142646
Errfi1	160	1.67893e-25	3.32971e-24	0.438686	-0.24982
Muc4	161	8.10252e-08	5.47664e-07	0.0915692	0.108196
Noct	162	2.1581e-25	4.20448e-24	0.393782	-0.160857
Rpn2	162	1.42151e-07	9.28608e-07	-0.20392	0.162892
Kpna4	163	4.16185e-25	8.06085e-24	0.229075	0.0927546
Fam83a	163	1.4871e-07	9.69542e-07	0.0197327	0.114301
Mast4	164	5.95028e-25	1.14577e-23	0.272363	0.152135
Ptgs2	164	2.01191e-24	3.80768e-23	0.278514	0.177509
Smox	165	8.50877e-25	1.62896e-23	0.383003	-0.205266
Fam84a	165	1.55644e-07	1.01276e-06	0.0427364	0.0584736
Fbxo32	166	1.81188e-07	1.17206e-06	0.086604	0.136471
Lipa	167	9.43921e-08	6.32847e-07	0.141057	0.155416
Ddx21	168	2.02049e-07	1.29687e-06	0.120291	0.142027
Ppp2ca	169	3.07132e-24	5.77967e-23	0.313405	0.103858
Srsf3	169	2.38711e-07	1.51169e-06	0.0390724	0.206454
Spry2	170	3.0961e-24	5.79339e-23	0.239495	0.114398
Pkig	170	2.4239e-07	1.53121e-06	-0.142402	0.148563
Hspb1	171	5.80166e-24	1.07347e-22	0.665574	0.324077
Map7d1	172	1.07926e-23	1.98584e-22	0.277992	-0.0704042
Spag9	174	3.4433e-23	6.26605e-22	0.269848	0.0377104
Hacd3	174	3.34111e-07	2.08003e-06	0.0756886	0.0971516
Trim47	175	4.57642e-23	8.28257e-22	0.363891	0.0523066
Hspe1	175	3.47086e-07	2.15675e-06	-0.35266	0.201972
Srsf5	176	4.63311e-23	8.33959e-22	0.318833	0.0135722
Hilpda	176	3.2665e-15	4.03681e-14	0.233191	0.181556
Cebpd	177	5.24575e-23	9.39131e-22	0.538936	0.250629
Timp1	177	4.2325e-07	2.59113e-06	0.0650753	0.0844069
Actn1	178	1.32141e-22	2.35296e-21	0.312942	-0.292667
Plscr1	178	4.65517e-07	2.83418e-06	0.0251069	0.0956179
Bag3	179	1.39831e-22	2.47658e-21	0.242565	0.122496
Tprn	180	4.87405e-07	2.95657e-06	0.012801	0.062773
Csrnp1	181	2.61244e-22	4.60233e-21	0.198671	0.0189018
Yrdc	182	2.81867e-22	4.93938e-21	0.241462	0.103752
Txnrd1	182	5.60474e-20	8.96759e-19	0.290388	0.202849
Vmp1	183	4.05344e-22	7.06579e-21	0.250767	0.136894
Pam	184	6.78292e-07	4.06239e-06	0.0750171	0.0972109
Cystm1	185	2.5834e-21	4.45637e-20	0.316962	-0.155984
Fkbp2	185	7.0809e-07	4.22557e-06	-0.165051	0.163347
Stx6	186	2.6212e-21	4.49814e-20	0.212444	0.0225644
Ckb	186	7.16212e-07	4.26636e-06	0.0278261	0.0324576
Vcl	187	2.85127e-21	4.86773e-20	0.251045	-0.105977
Cpe	187	4.03361e-16	5.40863e-15	0.284316	0.20601
Ifngr1	189	4.73701e-07	2.87871e-06	0.103398	0.123558
Ldlrad4	191	5.28205e-21	8.88028e-20	0.188006	0.104991
Sparcl1	191	8.98876e-07	5.25985e-06	0.0593769	0.0913114
Atp6v1b2	192	6.02557e-21	1.00791e-19	0.23291	0.0240532
Map3k8	193	9.12581e-21	1.51883e-19	0.17337	0.00745307
Rflnb	193	9.52873e-21	1.57796e-19	0.192411	0.125989
Tspan3	194	1.06263e-06	6.1962e-06	0.053391	0.149204
Nfkbiz	195	1.10729e-20	1.82455e-19	0.26348	-0.0329758
Hp	195	8.4226e-07	4.93728e-06	0.0686981	0.077112
Cldnd1	196	1.65479e-20	2.7132e-19	0.242049	0.0747737
Ogfod3	196	1.2251e-06	7.11846e-06	0.0410393	0.114968
Rb1	197	5.66848e-11	5.2736e-10	0.0923447	0.0797711
Gabarapl1	198	2.48749e-20	4.03852e-19	0.214607	0.0157654
Myo1e	199	3.59517e-20	5.80839e-19	0.261142	-0.0711602
Peak1	199	1.6154e-06	9.27244e-06	0.0521234	0.0952337
Rab8b	200	4.7268e-20	7.5996e-19	0.139927	0.0195489
Sfpq	200	2.64858e-08	1.92793e-07	0.160706	0.172827
Angpt1	201	1.69714e-06	9.72477e-06	0.0125407	0.0252139
Nfat5	202	9.68894e-20	1.54278e-18	0.186407	0.0572896
H2afz	202	1.71384e-06	9.8035e-06	-0.518014	0.185556
Myc	203	1.08978e-19	1.72696e-18	0.224563	0.0836972
Snta1	203	1.75843e-06	1.0024e-05	0.0716915	0.101759
Tinagl1	204	1.11923e-19	1.76518e-18	0.285584	0.113297
BC016548	204	1.85406e-06	1.05148e-05	0.00741096	0.0387479
Tiparp	205	1.18452e-19	1.85931e-18	0.248543	0.0604289
Adrm1	205	1.93318e-06	1.09261e-05	0.00653506	0.159213
Katnbl1	206	1.69458e-19	2.63495e-18	0.182337	0.0818894
Ddost	206	2.14686e-06	1.20515e-05	-0.0907958	0.157909
Smad7	207	2.6962e-19	4.15341e-18	0.180347	0.0889532
Glipr2	207	2.29871e-06	1.28821e-05	0.0251351	0.054106
Arhgdib	208	2.41037e-06	1.34851e-05	0.0402226	0.0447432
Lif	209	9.58429e-19	1.46282e-17	0.284648	0.00396297
Gata3	209	2.75961e-06	1.53096e-05	-0.174325	0.141248
Rassf1	210	1.09771e-18	1.66771e-17	0.285046	-0.442768
Serinc3	210	4.768e-09	3.66395e-08	0.152861	0.156005
Ptpn1	211	1.33101e-18	2.01292e-17	0.23447	0.0833975
Slc43a3	211	3.55687e-06	1.94075e-05	0.0574039	0.0822206
Cdcp1	212	1.35826e-18	2.0448e-17	0.225455	0.0971924
Gpr39	212	3.58007e-06	1.9502e-05	0.0156456	0.0188377
Rap2b	213	1.5377e-18	2.30446e-17	0.254179	0.0366952
Igfbp7	213	4.43296e-10	3.84345e-09	0.0991515	0.0846079
Hcar2	214	2.29662e-18	3.42631e-17	0.155185	-0.0725387
Ttc39b	214	8.06169e-08	5.46019e-07	0.0968495	0.0968712
Pnp	215	4.26733e-18	6.33784e-17	0.182928	-0.00323282
Nek1	217	6.09839e-06	3.22135e-05	0.0318766	0.0498769
Numbl	218	6.27317e-06	3.30314e-05	0.0130036	0.0176814
Relb	219	1.82471e-17	2.6623e-16	0.197231	0.0127005
Far1	219	6.39692e-08	4.44163e-07	0.133089	0.141183
Fam214b	220	2.6351e-17	3.82783e-16	0.182384	-0.0032256
Timm9	220	7.94905e-06	4.15912e-05	0.0492689	0.125969
Aen	221	3.40574e-17	4.92568e-16	0.191348	0.0679228
Pcsk5	221	8.0531e-06	4.20692e-05	0.0126569	0.0202899
Rora	222	4.07258e-17	5.86451e-16	0.141013	0.0219339
Rela	223	5.55016e-17	7.95763e-16	0.223411	-0.0746758
Uchl3	223	1.04188e-08	7.86042e-08	0.169444	0.167633
P2ry6	224	3.15954e-06	1.73827e-05	0.0331142	0.0343558
Dstn	225	7.07312e-17	1.00542e-15	0.362235	-0.704599
Mrps6	225	9.73194e-06	5.06e-05	-0.00186078	0.129876
Litaf	226	7.12347e-17	1.00824e-15	0.263478	-0.208675
Snai1	226	1.18797e-09	9.739e-09	0.0808488	0.0686165
Muc1	227	8.23459e-17	1.15866e-15	0.175322	0.0519414
1500015A07Rik	227	2.59516e-16	3.55172e-15	0.165602	0.107823
Ak1	228	8.25616e-17	1.15866e-15	0.12719	0.0528495
Pipox	228	9.97294e-06	5.16908e-05	0.0148005	0.016623
Tnk2	230	1.38266e-16	1.914e-15	0.185184	0.119115
Nedd9	230	8.84278e-09	6.68659e-08	0.123346	0.111037
Reep3	231	1.38695e-16	1.914e-15	0.203531	0.0528128
Vamp5	231	1.56952e-05	7.90008e-05	0.0322734	0.0568119
Ppp2r2a	232	1.73256e-16	2.38102e-15	0.184339	0.0112207
Aplp2	232	1.57644e-05	7.92287e-05	0.0869627	0.140357
Runx1	233	1.58382e-05	7.94791e-05	0.0361625	0.0997121
Rnf11	234	3.0685e-16	4.1651e-15	0.208952	0.0170652
Hivep3	234	1.55047e-05	7.82798e-05	0.0833447	0.103387
Pdlim5	235	3.45624e-16	4.67227e-15	0.224735	-0.150571
Tuba1b	235	1.71201e-05	8.53942e-05	-0.101243	0.158201
Ckap4	237	4.97368e-16	6.6156e-15	0.157397	0.00937969
Lamb3	238	2.00865e-05	9.95908e-05	0.0712771	0.0852025
Ceacam1	239	6.76972e-16	8.93279e-15	0.32862	-0.373422
Atp6v1b1	240	1.08431e-05	5.57645e-05	0.10488	0.121261
Nmd3	241	8.25835e-16	1.08109e-14	0.165329	0.0691541
Zfp451	241	2.27305e-05	0.000111531	0.0488694	0.0736347
Egfr	242	8.33975e-16	1.08745e-14	0.146279	0.028934
Rrs1	243	9.29169e-16	1.20683e-14	0.158116	0.101893
Hoxb4	243	2.48924e-05	0.000121063	-0.00273374	0.0106189
Sept11	244	9.44951e-16	1.22253e-14	0.210897	0.0844427
Capn2	245	9.78852e-16	1.26146e-14	0.185717	0.021894
Psmd1	245	2.65192e-05	0.000128221	0.0447397	0.122883
Ypel5	246	1.07864e-15	1.38468e-14	0.177363	0.00507355
Mpp5	247	1.5084e-15	1.92888e-14	0.185361	0.110983
Tbc1d24	247	2.68983e-05	0.000129865	0.019298	0.0253362
Rsrc2	248	1.56436e-15	1.99275e-14	0.211453	0.0602514
Postn	248	2.69696e-05	0.00013002	0.0405358	0.0419691
Sms	249	2.76598e-05	0.000132767	0.0443765	0.113606
Tlr2	250	2.28682e-15	2.86892e-14	0.191134	0.0779004
Vcp	251	2.99003e-05	0.0001429	0.0074948	0.147852
Pip5k1a	252	3.21348e-15	4.00114e-14	0.184018	-0.073272
Selenom	252	3.04395e-05	0.000145267	0.0871294	0.125117
Igfbp3	253	3.05348e-05	0.000145513	0.027381	0.0422533
Kdm6b	254	4.1049e-15	5.05406e-14	0.174975	0.0489289
C4b	254	3.11087e-05	0.000147399	0.0321777	0.0344193
Clic6	255	4.34317e-15	5.32763e-14	0.113428	0.0330377
Ecm1	255	1.42779e-14	1.71958e-13	0.145612	0.0975517
Tcp11l2	256	6.75315e-15	8.25329e-14	0.127041	0.0627189
Selenop	257	7.45277e-15	9.07484e-14	0.214172	-0.0171689
Pbx1	257	3.36743e-05	0.000158874	-0.0516839	0.131533
Tnfaip8	258	6.49198e-06	3.40752e-05	0.0683459	0.0742543
Coq10b	260	1.22696e-14	1.4831e-13	0.21235	-0.0289342
Slc6a6	261	3.77496e-05	0.000176841	0.0595647	0.077093
Sgk1	262	1.48795e-14	1.78554e-13	0.326836	-0.0133283
Hexa	262	3.81395e-05	0.000177913	0.036933	0.0443309
Ildr1	263	3.87058e-05	0.000180047	0.0728965	0.0903702
Eif1a	264	1.99208e-14	2.3733e-13	0.220904	-0.0519506
Ssb	264	3.98275e-05	0.000184488	0.0856211	0.137461
Ndel1	265	2.02355e-14	2.40214e-13	0.212531	0.0149574
Rrp9	266	4.5796e-05	0.000210463	0.0527456	0.0805348
Por	267	3.78208e-14	4.47366e-13	0.148828	0.0511132
Pgm1	267	2.40866e-09	1.92228e-08	0.0819076	0.0625005
Pld2	268	5.1186e-14	6.03302e-13	0.115969	0.0203389
Mirt1	269	7.51655e-14	8.82795e-13	0.174359	0.0329191
Prtn3	269	4.77386e-05	0.000218083	0.0205156	0.0329283
Jak1	270	7.76276e-14	9.0849e-13	0.186281	0.0795751
Specc1	270	4.92129e-05	0.0002242	0.0583119	0.0875304
Ocln	271	7.9171e-14	9.2329e-13	0.149309	-0.0419398
Gsta4	271	4.93007e-05	0.000224291	-0.0148806	0.0850806
H2-Q4	272	9.9572e-14	1.15713e-12	0.22106	-0.0584695
Cflar	273	1.44492e-13	1.66745e-12	0.176178	0.086495
Arhgef6	273	7.5892e-11	7.02107e-10	0.148177	0.111685
Prss8	274	1.45238e-13	1.67024e-12	0.163848	0.029753
Naglu	274	5.4614e-05	0.000247783	0.0232425	0.0494582
Btbd10	275	1.59298e-13	1.82558e-12	0.129115	0.0591329
Srsf6	275	2.75791e-05	0.000132572	0.118103	0.144699
Las1l	276	1.74652e-13	1.99465e-12	0.257244	-0.0347326
Lmo1	276	5.69967e-05	0.000257535	-0.0393631	0.0694929
Eea1	277	3.81382e-13	4.23872e-12	0.161245	0.1103
Ace	278	1.83104e-13	2.07685e-12	0.130811	0.0881278
Cdh1	279	2.24314e-13	2.53559e-12	0.211448	-0.0569199
Sh2d4a	279	2.75117e-12	2.89266e-11	0.119277	0.0850587
4833407H14Rik	280	2.78004e-13	3.13179e-12	0.0708299	0.0140434
Use1	281	3.08526e-13	3.45215e-12	0.205342	-0.0262869
Pcna	281	7.05371e-05	0.000313162	0.0383374	0.0916592
Rras2	282	3.21252e-13	3.58245e-12	0.202621	0.0264848
Ang4	282	8.5588e-08	5.76154e-07	0.071658	0.0624519
Hacd4	283	7.2023e-05	0.000319331	0.0276255	0.0489434
Sbno2	284	3.92944e-13	4.35262e-12	0.181353	-0.0231151
Ltbp3	284	1.88114e-06	1.06502e-05	0.101529	0.101918
Rc3h1	285	4.17861e-13	4.61318e-12	0.122849	0.0367319
Sfrp1	286	3.8566e-05	0.000179649	0.0583096	0.0633537
H2-T23	288	6.15556e-13	6.75073e-12	0.222081	0.00780182
Casp8	288	8.78128e-05	0.000384634	0.0231456	0.0615319
Rpn1	289	8.80244e-05	0.000384634	-0.144115	0.111612
Itpkc	290	8.46687e-13	9.22444e-12	0.163148	-0.0305689
Hnrnpa2b1	290	8.98062e-05	0.000391882	-0.162993	0.138881
Fbl	291	9.05573e-05	0.000394639	-0.0414086	0.118945
Osmr	292	9.35555e-13	1.0126e-11	0.155611	0.0856015
Nifk	292	2.88406e-05	0.000138235	0.0881336	0.0987715
Rab11fip1	293	1.66438e-12	1.78975e-11	0.162124	-0.0635956
Hexb	294	1.8393e-12	1.97144e-11	0.12043	0.028053
Ecscr	294	0.000101854	0.000440968	0.0323421	0.0436433
Nrg1	295	2.15932e-12	2.30699e-11	0.1038	0.0469489
Fam167a	295	3.80389e-05	0.000177693	0.0769301	0.0818366
Smad3	296	2.31903e-12	2.46174e-11	0.104182	0.030302
Rasgef1c	296	0.000106885	0.000460943	0.00488959	0.0231261
Ppp1r18	297	2.53308e-12	2.68037e-11	0.116261	0.0563517
Neat1	298	0.000131615	0.000563916	0.0365351	0.178165
Ptp4a2	299	3.51619e-12	3.6737e-11	0.193516	0.0510243
Ifi27l2a	299	0.000136645	0.000584712	0.110727	0.103363
Wsb1	300	3.73877e-12	3.89396e-11	0.131747	0.0220652
Smurf2	301	4.07649e-12	4.23239e-11	0.143796	0.0648786
Pttg1	301	0.000141787	0.000604373	0.0574181	0.0967034
F11r	302	4.1035e-12	4.24713e-11	0.187959	-0.0922066
St3gal1	302	4.47001e-06	2.41118e-05	0.0618214	0.0585697
Tbc1d1	303	4.24012e-12	4.37485e-11	0.123088	0.0400575
Lyst	304	0.000174047	0.000736199	0.0161795	0.0297098
Grpel2	305	5.19354e-12	5.32539e-11	0.179308	0.0300165
Agpat2	305	1.73201e-07	1.12258e-06	0.106079	0.092035
Hmga1b	306	5.4609e-12	5.58225e-11	0.0926649	-0.00407653
Ccrl2	306	1.33574e-06	7.7342e-06	0.0560353	0.0489057
Csnk1e	307	5.59779e-12	5.70458e-11	0.176434	-0.0995673
Col25a1	307	0.000182001	0.000767883	0.0119679	0.0187704
Myh9	308	5.69689e-12	5.78776e-11	0.187742	-0.179119
Grina	309	6.93432e-12	6.97689e-11	0.170318	-0.00661166
Ang5	309	3.5688e-07	2.20932e-06	0.0579737	0.050661
Fam129b	310	6.95161e-12	6.97689e-11	0.176074	-0.0435915
Wsb2	311	7.87448e-12	7.87924e-11	0.176057	0.0790922
Cd68	312	9.41714e-12	9.39445e-11	0.0734537	-0.0234933
AW112010	312	0.000206948	0.000864328	-0.00797799	0.0880103
Trip10	313	1.00825e-11	9.99795e-11	0.143295	-0.0170885
Cnmd	313	0.000207629	0.000866081	0.0132852	0.033375
Klhl21	314	1.05799e-11	1.04598e-10	0.111553	0.0287413
Srm	314	0.000211472	0.000880999	-0.0443615	0.0966457
Ifnar2	315	3.61488e-10	3.15066e-09	0.128383	0.0934069
Cnksr1	316	1.19525e-11	1.17467e-10	0.111683	0.0464568
Nfib	316	0.00022355	0.000928981	-0.271205	0.132452
Fam133b	317	1.24029e-11	1.21534e-10	0.159139	0.0392018
Cd200	317	0.000242249	0.000997919	0.0617968	0.101177
Chrnb1	318	6.62666e-09	5.0454e-08	0.0756118	0.0566641
Chst11	319	0.000271311	0.00111211	0.018027	0.0242384
Stx3	320	1.34773e-11	1.31672e-10	0.181447	-0.0211344
Fam102a	320	0.000279726	0.00113955	0.038757	0.061184
Hipk1	321	1.4687e-11	1.43068e-10	0.131565	0.0796015
Prmt1	321	0.000298179	0.00120878	-0.0885115	0.112767
Ptpn11	322	1.92502e-11	1.86423e-10	0.153092	0.0261297
Gdpd3	323	1.99358e-11	1.925e-10	0.195374	0.0162889
Cpne8	323	0.000310278	0.00125475	0.0284972	0.0587957
Kitl	324	0.000317532	0.00128096	0.0540683	0.0691282
Clip1	325	2.27751e-11	2.18641e-10	0.143922	0.0563766
Fgf1	325	2.73729e-08	1.98813e-07	0.0554091	0.0365088
Dab2	326	0.000330504	0.00132522	-0.0464057	0.0754072
Irx3	327	4.04933e-11	3.85385e-10	0.24578	0.122124
Map2k3os	327	0.000338255	0.00135139	0.028739	0.031472
Btg3	328	4.1429e-11	3.9316e-10	0.111607	0.0318189
Eid3	328	0.000343355	0.00137011	0.0177602	0.0245397
Vegfa	329	4.67086e-11	4.40737e-10	0.114257	0.0518659
Adgrg1	329	0.000349314	0.00138892	0.0241565	0.0450992
Cggbp1	330	4.79286e-11	4.50964e-10	0.17665	-0.0437033
Adgrl2	330	0.000179217	0.000757098	0.0470784	0.0559244
Zfand2a	331	5.28739e-11	4.96086e-10	0.122603	-0.0299674
Pitpnc1	331	0.000360677	0.00142898	0.0413896	0.0635517
Nfkb2	332	5.46587e-11	5.11383e-10	0.130352	0.0717545
Bcl2	332	0.000360697	0.00142898	0.0212313	0.0481823
Pdlim7	333	5.54512e-11	5.17336e-10	0.177136	-0.0213051
Tgfb1	333	4.30183e-06	2.32425e-05	0.0642361	0.0557996
Sorcs2	334	0.000411691	0.00161555	0.00152925	0.0108297
Samd4b	335	6.40946e-11	5.94625e-10	0.158349	-0.047663
Rab20	335	1.5004e-10	1.35036e-09	0.0913151	0.0638086
Serping1	336	0.000419325	0.00164161	0.0168551	0.0192125
Rnf24	337	8.004e-11	7.36368e-10	0.0814211	0.0389479
Afap1	337	1.06717e-09	8.77043e-09	0.117792	0.0824773
Rhog	338	8.4295e-11	7.73365e-10	0.157996	-0.0622676
Sh3bp2	338	1.03233e-05	5.33396e-05	0.0597485	0.0570818
Sertad1	339	8.90269e-11	8.14523e-10	0.160022	-0.0402691
Acap2	340	9.65854e-11	8.78821e-10	0.149025	0.0449985
Ppa1	340	0.000473149	0.00183069	-0.0436335	0.108415
Oser1	341	1.08857e-10	9.87768e-10	0.172482	-0.09778
4930402H24Rik	341	3.66054e-05	0.000171724	0.0528261	0.0520232
Chic2	342	1.30883e-10	1.18116e-09	0.177111	-0.109414
Celf4	342	1.31934e-05	6.69165e-05	0.0682053	0.0643466
Smdt1	343	0.000507922	0.00195609	-0.314835	0.107973
Rhbdf1	344	1.57405e-10	1.4128e-09	0.135599	0.0496774
Cldn23	344	0.000524314	0.00201454	0.0168401	0.0737082
Trim27	345	0.000529536	0.00203224	0.0452845	0.0945235
Fstl3	346	1.64623e-10	1.47359e-09	0.076761	0.00349891
Osgin2	346	0.000532134	0.00203985	0.0297491	0.0433152
Isg20	347	1.83243e-10	1.62734e-09	0.109045	-0.0267328
Serpine2	347	0.000548245	0.00209918	0.010513	0.076936
Rlim	348	2.12689e-10	1.88349e-09	0.13105	0.0356062
Tox4	348	6.53716e-05	0.000292946	0.074361	0.0802474
Dot1l	349	2.49926e-10	2.20735e-09	0.144711	-0.0214519
Rab11a	350	2.54165e-10	2.23882e-09	0.183956	-0.163873
Wdr43	350	1.08864e-08	8.19451e-08	0.123603	0.0914095
Mfhas1	351	2.65527e-10	2.33269e-09	0.0829005	0.031738
Ntng1	351	0.00059798	0.00227123	-0.000359718	0.0346293
Gm26532	352	3.04627e-10	2.66911e-09	0.102185	0.00336662
Slc5a3	352	0.000613425	0.0023219	0.0161815	0.0380923
Ralgds	353	3.562e-10	3.11276e-09	0.149781	-0.000148372
Adss	353	8.47462e-05	0.000372254	0.0880098	0.0954748
Hacd2	354	5.51688e-10	4.70925e-09	0.14023	0.097714
Mdh1	355	0.00062929	0.00237652	-0.304212	0.122803
2200002D01Rik	356	4.75324e-10	4.11037e-09	0.179222	-0.0533714
Psmb10	356	0.000640912	0.0024149	-0.0793658	0.100767
Trib1	357	4.79707e-10	4.13747e-09	0.210192	-0.00806106
Ppif	358	4.90855e-10	4.22263e-09	0.194684	0.00512125
Ankrd28	358	0.000631952	0.00238385	0.0408761	0.0485605
Kdm5b	359	4.94537e-10	4.24328e-09	0.160173	-0.10431
Tmem185b	360	1.25132e-09	1.01827e-08	0.0748791	0.0548355
Parm1	361	5.80353e-10	4.93809e-09	0.0901461	0.0193923
Mocs2	361	0.000695553	0.00260596	0.0230987	0.0971327
Prpf38b	362	5.81478e-10	4.93809e-09	0.149479	0.0340796
Acot7	362	2.4348e-06	1.3553e-05	0.0898721	0.0781024
Os9	363	5.87139e-10	4.97342e-09	0.134695	0.0642438
Ociad2	363	0.000727016	0.00271769	0.0375144	0.0618798
Gprc5a	364	6.06298e-10	5.1226e-09	0.0991121	-0.00545471
Rsl1d1	364	2.05511e-06	1.15757e-05	0.120861	0.109422
Lysmd2	365	6.58217e-10	5.54711e-09	0.157184	-0.0650755
Casp12	365	0.00073882	0.0027556	-0.00846391	0.0486645
Cdca4	366	6.6322e-10	5.57509e-09	0.11298	-0.0447202
Nol8	366	0.00077935	0.00290023	0.0228131	0.0476214
Zfp800	367	6.77913e-10	5.68417e-09	0.126283	-0.0100385
Bbox1	367	0.000805294	0.00298004	0.00506495	0.0109476
Flt1	368	7.12125e-10	5.95595e-09	0.083312	0.00321656
Dclk1	368	0.000808845	0.00298984	0.00822327	0.0176079
Wdr1	369	7.82303e-10	6.52642e-09	0.170368	-0.146664
Gpsm1	369	0.000228805	0.000949627	0.0218685	0.0219789
Cks1b	370	0.000843139	0.00309587	-0.199963	0.0917396
Itm2c	371	8.35799e-10	6.95519e-09	0.155135	0.0679431
Mapk8	371	0.000870403	0.00318891	0.0201903	0.0534476
Eif4a2	372	8.3797e-10	6.95578e-09	0.161302	-0.00625026
Fam110a	373	8.9879e-10	7.44198e-09	0.167441	0.0852413
Oat	373	0.000893434	0.00326246	0.0400715	0.0535852
Klf16	374	9.19115e-10	7.5913e-09	0.0920587	-0.0273188
Fhl2	374	2.41562e-06	1.34902e-05	0.0516863	0.0432896
Mrps28	375	0.00091304	0.00332672	-0.177733	0.0864031
Uqcc2	376	0.000917767	0.00334027	-0.339792	0.112775
Lrp1	377	3.49969e-06	1.9127e-05	0.0373123	0.0296261
Slc45a3	378	1.24538e-09	1.01593e-08	0.0882883	0.0279999
Bcam	378	0.000960824	0.00348549	0.0316716	0.0423888
Ttll5	379	0.000488829	0.00188695	0.0362022	0.0428559
Nr3c1	380	1.55901e-09	1.26555e-08	0.139936	0.0668718
Jmjd1c	380	0.000837634	0.00307907	0.0745026	0.0938334
Frmd6	381	1.66242e-09	1.3462e-08	0.0990526	0.0664343
Creld2	381	0.000988181	0.0035707	-0.168296	0.0811764
Crebrf	382	1.66654e-09	1.34624e-08	0.0681093	0.022974
Serpinb8	383	1.83319e-09	1.47726e-08	0.0998434	0.0319789
C3	383	0.00105238	0.00378445	0.0165734	0.0274558
Rhov	384	2.02551e-09	1.62433e-08	0.12469	0.0411919
Zhx2	384	0.00108961	0.00388878	0.0058326	0.0136249
Pea15a	385	2.40321e-09	1.92228e-08	0.149282	-0.0317595
Id2	385	0.00111148	0.00396255	-0.23681	0.0623678
Airn	386	0.00113501	0.00403343	0.0312012	0.0414484
Senp2	387	2.60461e-09	2.07367e-08	0.11663	-0.0152905
Ltbp1	387	0.00119646	0.00423363	0.0274568	0.043641
Ext1	388	2.62516e-09	2.08502e-08	0.104953	0.0322009
Tac1	390	0.00125033	0.0044007	0.0198182	0.0462912
Kctd9	391	3.10209e-09	2.43462e-08	0.0686917	-0.00315882
Ggta1	391	0.00126193	0.00443215	0.015907	0.0268724
Stx11	392	3.25439e-09	2.54812e-08	0.071297	-0.0046562
Fryl	392	0.00133569	0.00467634	0.0292294	0.0458596
Ifngr2	393	3.59998e-09	2.80544e-08	0.139581	0.0521459
Son	393	4.58125e-05	0.000210463	0.117245	0.110616
Tpm4	394	3.68522e-09	2.86513e-08	0.182129	-0.226337
Tmem251	394	5.2688e-09	4.03008e-08	0.118277	0.0862143
Abtb2	395	3.83137e-09	2.97178e-08	0.108224	0.0232834
Ndufa1	395	0.00141321	0.0049269	-0.250229	0.105158
Zfp326	396	4.03257e-09	3.12053e-08	0.14839	0.0978346
Sept9	396	0.00142389	0.0049549	0.0608314	0.109937
Cfb	397	0.00142423	0.0049549	0.0154069	0.0403511
Ptpre	398	2.18667e-07	1.3945e-06	0.077796	0.0571369
Fkbp4	399	0.00153943	0.00530551	-0.241452	0.0964084
Natd1	401	5.214e-09	3.9974e-08	0.065837	0.0138156
Ephb6	401	3.09899e-05	0.000147047	0.029906	0.0270656
Bst2	403	3.06451e-06	1.6888e-05	0.194448	0.15997
Plxdc2	404	6.44436e-09	4.91791e-08	0.103982	0.0629607
Apod	404	6.15406e-05	0.000276933	0.0375092	0.033405
Ank	405	1.97124e-06	1.11222e-05	0.036393	0.0283201
Kctd11	406	7.06877e-09	5.36967e-08	0.121742	0.0102498
Pgrmc1	407	7.54814e-09	5.7207e-08	0.154062	-0.0773354
Mybbp1a	407	0.00182685	0.00623766	-0.0110053	0.0615354
A630023A22Rik	409	0.00192015	0.00652931	0.00673967	0.0248332
Adamts4	411	0.00104844	0.00377439	0.0155892	0.0148208
Edn1	412	1.26323e-08	9.48713e-08	0.11372	0.0496978
Dexi	412	0.00214316	0.00722824	-0.00800865	0.0406386
Tpbg	413	1.29518e-08	9.70505e-08	0.138226	0.0182132
Pfkfb3	415	1.94442e-07	1.25047e-06	0.0723605	0.0504986
Kif2a	416	1.60183e-08	1.19488e-07	0.121599	0.0406372
Ercc1	417	1.6184e-08	1.20452e-07	0.113478	0.0140012
Ndufaf2	417	0.00224999	0.00757313	-0.0844667	0.0603309
Med24	418	0.00227282	0.00762671	0.00720401	0.0514653
Twistnb	419	2.59119e-08	1.90404e-07	0.110221	0.0392268
Eloa	420	2.59311e-08	1.90404e-07	0.0969751	0.0204827
Pop5	420	0.00229754	0.00769518	-0.256413	0.0796347
Pawr	421	2.5985e-08	1.90404e-07	0.0926282	-0.00446582
Lmod1	421	0.00234871	0.00785751	-0.00632936	0.0332459
Nupr1	422	2.63632e-08	1.92413e-07	0.277803	0.0644553
Lmbr1l	423	2.63755e-08	1.92413e-07	0.0630464	-0.0271936
Capsl	423	0.00237236	0.00792861	0.0343808	0.0437759
Nfix	424	0.00244813	0.00816537	-0.0721548	0.0892664
Arf2	426	2.7941e-08	2.02496e-07	0.123487	0.0015835
Gstt3	426	0.00249666	0.00830713	0.00936812	0.0834908
Slc11a2	427	3.02742e-08	2.1863e-07	0.0791925	0.0515473
Bhlhe40	427	0.00250067	0.00830713	0.0295503	0.0566276
Anxa8	428	3.02992e-08	2.1863e-07	0.0383467	0.0217409
Abhd2	428	0.00125165	0.0044007	0.0561776	0.0702609
Tgfbr2	429	3.21981e-08	2.31826e-07	0.0945328	0.0484375
Rbm47	429	0.00252986	0.00838727	0.0444766	0.0697746
Serpinb5	430	3.50915e-08	2.51565e-07	0.157854	0.105887
Cgref1	430	5.27943e-06	2.81117e-05	0.0669077	0.0471095
P4ha1	431	3.69094e-08	2.64026e-07	0.0629967	-0.000717494
Qpct	431	3.94556e-05	0.000183021	0.0371258	0.0309613
Wfdc2	432	3.79315e-08	2.70752e-07	0.128525	0.0228586
Cd59a	432	0.00272552	0.00896739	0.0262896	0.0477842
Acot9	433	3.80445e-08	2.70975e-07	0.138554	0.00517185
Igfals	433	0.00272867	0.00896739	-0.0360632	0.0301577
Samd9l	434	3.91127e-08	2.77986e-07	0.084057	-0.0233118
Timm29	434	0.0028156	0.0092238	-0.00278859	0.0372105
Rock2	435	4.25153e-08	3.01522e-07	0.146996	-0.0400677
Nolc1	435	0.00283975	0.00929372	-0.0304886	0.0753679
Thra	436	4.53476e-08	3.20922e-07	0.0887765	0.00740274
Tmem2	436	0.00144075	0.00500711	0.0407579	0.0482392
Ell	437	4.70438e-08	3.31509e-07	0.076066	0.0299299
Mrpl51	437	0.0029631	0.00964976	-0.154578	0.0890553
N4bp1	438	5.20726e-08	3.65202e-07	0.104071	0.0664083
Taldo1	438	0.00298243	0.00970317	-0.332594	0.117256
Actg1	439	5.21559e-08	3.65202e-07	0.233431	-0.696542
Tceal8	439	0.00299622	0.00973847	0.0212689	0.0534735
Nedd4l	440	5.27932e-08	3.68884e-07	0.109473	0.047033
Hspa13	440	0.00150783	0.00520744	0.0457785	0.0538975
Nrip1	441	0.000479277	0.00185223	0.0862797	0.0928884
5730559C18Rik	442	6.30898e-08	4.38977e-07	0.0878228	0.0535443
Vtcn1	442	0.00308538	0.0100086	0.0228673	0.0394827
Col16a1	443	0.003163	0.0102203	-0.0678366	0.0548245
Cry1	444	6.44329e-08	4.46447e-07	0.100906	-0.00995075
Fads1	444	0.00318465	0.0102803	-0.00379311	0.0280899
Plk2	445	6.50968e-08	4.49622e-07	0.156339	-0.10813
Pltp	445	0.00327185	0.010531	0.00838368	0.0116268
Ephx1	446	6.51626e-08	4.49622e-07	0.102648	0.00786957
Icam1	446	0.00329732	0.0106027	0.0190063	0.0327782
Irf2bpl	447	6.6032e-08	4.54674e-07	0.124137	-0.055705
Tapbp	447	0.000291946	0.00118496	0.0980751	0.103366
Eif3j2	448	6.65095e-08	4.56456e-07	0.141321	0.0140515
Dnajc25	448	0.00347174	0.0111096	0.0438736	0.0622098
Arid4b	449	6.65666e-08	4.56456e-07	0.135884	-0.078844
Tjp2	450	6.80896e-08	4.65935e-07	0.149504	-0.120874
Rnpep	450	0.000279462	0.00113955	0.0793243	0.0790004
Fcgrt	451	6.9192e-08	4.72503e-07	0.0512013	0.0295743
Amd1	452	7.51357e-08	5.10984e-07	0.115872	0.014575
Tgoln1	454	8.51172e-08	5.74151e-07	0.124079	-0.0780008
Csdc2	454	5.52338e-07	3.32608e-06	0.04486	0.0291139
Atg101	456	8.71007e-08	5.85147e-07	0.137465	-0.12973
Cxcl16	456	0.00108544	0.00387806	0.0651474	0.0654819
Efna5	457	4.62004e-06	2.48402e-05	0.0691398	0.0579999
Clcf1	458	3.86565e-06	2.09886e-05	0.0700449	0.0592824
D1Ertd622e	459	1.08221e-07	7.241e-07	0.0901954	0.0227439
Ift43	459	0.00375524	0.0119246	-0.00466281	0.0747291
Cd3eap	460	1.12198e-07	7.47058e-07	0.117908	0.0693283
Pim3	461	1.12329e-07	7.47058e-07	0.0638409	-0.00967893
Agrn	461	0.00381932	0.0121165	0.0333132	0.0517801
Tspan5	462	1.12996e-07	7.49542e-07	0.0843976	0.0404747
Acsl3	462	0.00384543	0.0121876	-0.00339432	0.0511099
Atf6	463	1.13155e-07	7.49542e-07	0.0785648	0.00592692
Ctdspl2	463	0.00386152	0.0122269	0.00714623	0.0326702
Bid	464	1.16099e-07	7.67508e-07	0.0911748	-0.00910116
Oaz2	464	2.86689e-06	1.58782e-05	0.127151	0.0982947
Sf3b3	465	6.77934e-05	0.000302196	0.081358	0.0793282
Il13ra1	466	1.25621e-07	8.28801e-07	0.0873479	0.0442402
Hdac7	466	8.06245e-07	4.75139e-06	0.0506389	0.0358998
Tmed5	467	1.27096e-07	8.36863e-07	0.135853	0.00201108
Klf5	468	1.32872e-07	8.73159e-07	0.188805	-0.326995
Scin	469	1.36729e-07	8.96727e-07	0.0559284	0.0264646
Ddah1	469	0.000284533	0.00115771	0.0870209	0.0845282
Erbin	470	1.38295e-07	9.05201e-07	0.111081	0.0164578
Trib2	470	0.0043301	0.0135813	-0.0889775	0.0572658
Arhgef5	472	1.68874e-07	1.09669e-06	0.121345	0.00930838
Smarcd1	472	0.00477861	0.0149028	-0.00503971	0.0360656
Arhgap42	473	0.00480666	0.0149762	0.0276193	0.0386816
Eaf1	474	1.86106e-07	1.20152e-06	0.0779571	0.0221656
Nhs	474	0.0048203	0.0150046	0.0232611	0.0297094
Cdc42ep4	475	1.9251e-07	1.24046e-06	0.150221	-0.0714122
Osgin1	475	0.000100701	0.000436548	0.0783269	0.0632987
Raph1	476	0.00490127	0.015228	0.0281516	0.0706594
Trim30a	477	2.18082e-07	1.3945e-06	0.0526074	0.0224324
Fabp5	477	0.00491232	0.015248	-0.626438	0.123819
Glrx	478	2.18306e-07	1.3945e-06	0.234546	-0.225675
Cep85l	478	0.00492358	0.0152686	0.000907729	0.00781839
Smoc1	479	0.00498353	0.0154401	0.00500615	0.0108135
Btbd9	480	2.18943e-07	1.3945e-06	0.0896624	-0.031737
Il4ra	481	2.2115e-07	1.40585e-06	0.0720537	0.0146569
Hnrnph1	481	0.00520299	0.0160749	0.0570111	0.0880242
Tbcc	482	2.31117e-07	1.4664e-06	0.175239	-0.0645085
Mak16	482	0.0054136	0.0166789	0.0437105	0.0602551
Elf1	483	2.4272e-07	1.53121e-06	0.133516	-0.0723695
Tbl3	483	0.00183113	0.00624581	0.0498574	0.0526068
Usp43	484	2.43535e-07	1.53344e-06	0.0735846	0.0293442
S100a8	484	0.00555684	0.0170476	-0.0255748	0.0805757
Tspan33	485	2.46296e-07	1.54788e-06	0.0918865	0.0340509
Ppp1r14b	485	0.00555899	0.0170476	-0.336053	0.0932713
Cd55	486	2.49769e-07	1.56673e-06	0.112731	0.00281849
Timp3	486	0.000692784	0.00259853	0.0265982	0.0251039
Rbbp6	487	3.02179e-07	1.89191e-06	0.126083	0.0500968
AC161165.6	487	0.00582491	0.0177644	0.00775583	0.0112904
Znrf1	488	3.20027e-07	1.99987e-06	0.128085	0.0554722
Dapk2	488	0.00593566	0.0180689	0.00579694	0.0217383
Banp	489	3.21962e-07	2.00817e-06	0.0833035	0.0120114
Rnpc3	489	0.00627077	0.0189496	0.0133472	0.0422593
Sorl1	490	3.50122e-07	2.17154e-06	0.0492448	0.0139615
Pdlim1	490	0.00651691	0.0196218	0.042611	0.0951784
Acbd3	492	3.68758e-07	2.27859e-06	0.11391	0.0134772
Lgals2	492	0.00677026	0.0203292	0.00808948	0.01321
Fndc5	493	0.0068582	0.0205746	0.0039258	0.0218786
Cyld	494	3.79938e-07	2.34187e-06	0.104765	-0.0281154
Rnasel	495	3.80412e-07	2.34187e-06	0.134714	0.0645799
Suox	495	0.00692755	0.0207431	-0.00383069	0.0073646
Cldn7	496	3.82323e-07	2.34927e-06	0.156345	-0.123019
1110035H17Rik	496	0.00699293	0.0208842	-0.000320366	0.0164713
Lpin2	497	4.1677e-07	2.55619e-06	0.082443	0.0382633
Thap3	497	0.00702445	0.0209594	-0.012519	0.0292165
Syne2	498	4.53257e-07	2.76972e-06	0.0906072	0.0261303
Sil1	498	0.00704735	0.0209899	0.0158091	0.0558409
Coq8b	499	4.63603e-07	2.82772e-06	0.0798309	-0.00485169
Irf2bp2	499	0.00372519	0.0118519	0.038116	0.0458883
Ptprz1	500	0.00734706	0.0218237	0.0129406	0.0202409
Prkcd	501	5.0057e-07	3.03088e-06	0.106923	-0.0546842
Smim3	501	0.00736888	0.0218689	0.00634937	0.0165359
Zfp655	502	5.05454e-07	3.05486e-06	0.0980011	0.00741476
Jdp2	502	0.00737658	0.0218722	0.00627324	0.0174194
Prnp	503	5.37279e-07	3.24129e-06	0.0937691	-0.0149581
Fcor	503	0.00741834	0.0219763	0.00128512	0.0132282
Usp35	504	0.00743179	0.0219965	0.0107227	0.0125926
Spsb3	505	5.7784e-07	3.47333e-06	0.0822788	0.040812
Ifitm10	505	0.000150752	0.000640118	0.0277508	0.0183639
Ift27	506	0.00768341	0.0226804	0.0232648	0.0514146
Abca1	507	6.74398e-07	4.04639e-06	0.0318313	0.0130446
Npy	507	0.00451324	0.0141284	0.0477822	0.0443473
Trmt10c	509	7.00715e-07	4.18911e-06	0.0655103	0.0191361
Pole4	509	0.00808106	0.0237064	0.000102049	0.0828271
Stbd1	510	7.42378e-07	4.41428e-06	0.074454	-0.0244173
Mgat4b	511	7.50457e-07	4.45433e-06	0.0641695	0.00178526
Napb	511	0.00812766	0.023822	-0.00429688	0.0111673
Ahcyl2	512	7.7568e-07	4.59319e-06	0.0717238	0.00523279
Slc16a1	512	0.00407697	0.0128722	0.0154246	0.0181731
Akap8l	513	7.76626e-07	4.59319e-06	0.06245	0.00602726
Zbtb7a	514	7.78516e-07	4.59616e-06	0.130728	-0.117667
Wls	514	0.00198504	0.00671547	0.0640782	0.0670329
Gstt1	515	0.00839277	0.0245555	0.0185325	0.0335639
Rhbdf2	516	8.17995e-07	4.81208e-06	0.107338	-0.0955691
Chadl	516	0.000680121	0.00255393	0.0217398	0.0189481
Atp6v1e1	517	8.28192e-07	4.86343e-06	0.144796	-0.130503
Lgr6	517	0.00872161	0.0254278	0.0101707	0.0284651
Btg2	518	9.46993e-07	5.53164e-06	0.172844	-0.353895
Mrpl42	519	0.00889114	0.0258992	-0.257373	0.0727119
Hbp1	520	1.13183e-06	6.58806e-06	0.11416	-0.0504955
Tor1aip1	521	1.25308e-06	7.2683e-06	0.112469	0.0120763
Mbp	523	1.46138e-06	8.44691e-06	0.0719001	-0.0175168
Slc9a3r2	523	0.0093498	0.0271033	-0.0970469	0.0599812
Iqgap1	524	1.54217e-06	8.89838e-06	0.132574	-0.0999411
Lipm	524	0.0093536	0.0271033	0.00948002	0.00564496
Large1	525	1.54923e-06	8.92357e-06	0.0513636	0.0333833
Itga3	526	1.60434e-06	9.22498e-06	0.0594418	0.0223888
Fermt1	526	0.00505783	0.0156557	0.0259178	0.0302135
Serpinh1	527	0.000102658	0.00044387	0.0730129	0.0527555
Gm15867	529	1.74652e-06	9.97325e-06	0.0705246	-0.0148331
Gm29367	529	0.0098941	0.0285446	0.0143279	0.0161521
Dhx40	530	1.84431e-06	1.04894e-05	0.072111	0.00337401
Spcs2	530	0.0100339	0.0288724	-0.211653	0.0915306
Bet1l	531	1.84641e-06	1.04894e-05	0.102505	-0.00908578
Adarb1	531	0.000822652	0.0030312	0.0198863	0.0194423
Tmem150a	533	0.01021	0.0293281	0.0228203	0.0291876
Tmem158	535	2.10335e-06	1.18273e-05	0.0524365	0.0322348
Tgfbr1	535	0.000138087	0.00058936	0.0472617	0.039668
Plekhm2	537	2.41943e-06	1.34902e-05	0.0647761	0.0300691
Cytip	538	0.0106322	0.0304354	0.013823	0.0281773
Erc1	539	2.48129e-06	1.37887e-05	0.10533	-0.0160567
Sf3b1	541	2.92531e-06	1.61747e-05	0.13047	-0.119907
Sod2	541	0.00551821	0.0169539	0.0739146	0.0926026
Tnfrsf10b	542	3.02104e-06	1.66761e-05	0.0576477	-0.00854354
Plscr2	542	0.0111004	0.0315976	0.0158784	0.0374276
Acod1	543	0.0112363	0.0319438	0.00450496	0.00893381
Cox20	544	0.011275	0.0320265	-0.0628738	0.0596231
Atp6ap2	546	3.30914e-06	1.81756e-05	0.110695	-0.0408913
Ntn1	546	0.000190247	0.000799617	0.0654378	0.05469
Fnip1	547	3.38062e-06	1.85374e-05	0.0648911	-0.0030709
Ptx3	547	0.0118545	0.0335359	0.000872645	0.0266335
Cnn2	548	3.48557e-06	1.90814e-05	0.0864265	-0.117745
H2-Ab1	548	0.0119302	0.0336988	0.0335897	0.113779
Ifi27	549	0.00485356	0.0150939	0.0816107	0.095525
Pls3	550	3.62141e-06	1.96948e-05	0.0965754	0.00435619
Sdc2	552	3.87338e-06	2.09961e-05	0.124404	-0.0570663
Slc39a1	552	0.0127679	0.0358368	-0.000813455	0.0408
Crim1	553	3.9235e-06	2.1233e-05	0.0248941	0.00633343
E2f1	553	0.0127855	0.0358556	-0.0214987	0.0132547
Cdhr1	554	0.00339611	0.0108886	0.0467702	0.0454888
Sh3pxd2b	555	0.0128629	0.0360424	0.00632407	0.0412797
Zbtb20	556	4.51555e-06	2.43179e-05	0.11605	0.0672257
Nos1ap	556	0.0099911	0.0287744	0.0238752	0.0307229
2210407C18Rik	557	0.0129281	0.0361726	0.0121805	0.0230945
Optn	558	4.64112e-06	2.49131e-05	0.0613243	0.019234
Pde7a	558	0.0129313	0.0361726	-0.0190055	0.0288355
Cep83	559	4.65322e-06	2.49377e-05	0.0900693	0.0550235
Cd74	560	0.0134766	0.0375079	0.0953727	0.207903
Rest	561	5.00299e-06	2.67688e-05	0.112113	-0.0152377
S100a4	561	0.0135304	0.0376261	-0.00765822	0.0396334
Inf2	562	5.23038e-06	2.79404e-05	0.0363318	0.00124907
Atp10a	562	2.97708e-05	0.000142487	0.030131	0.0205565
Cobll1	563	5.26537e-06	2.8082e-05	0.0860801	0.0511734
Ndufs8	563	0.0138294	0.038361	-0.222336	0.0759232
Stat1	564	0.0139627	0.0386336	-0.0619319	0.0412868
Acvr1	565	5.75259e-06	3.05414e-05	0.0603865	0.00812106
Col18a1	565	0.00698541	0.0208806	0.0168004	0.0174643
Trp53rka	566	5.75417e-06	3.05414e-05	0.0613282	0.0233761
Phc2	567	5.93082e-06	3.14286e-05	0.10732	0.0154722
Bcar1	568	6.05213e-06	3.20202e-05	0.112631	-0.0294073
Bpgm	568	0.0143807	0.0396907	-0.00318014	0.0404121
Zfp469	569	6.23821e-06	3.28996e-05	0.0248805	0.0139718
Rnaseh2c	569	0.014512	0.0400199	-0.210217	0.0614621
Sdcbp2	570	6.3413e-06	3.33371e-05	0.0701035	0.036856
Enpp1	570	0.014732	0.040559	0.00435478	0.0276738
Eif1b	571	0.0149339	0.0409784	-0.00384804	0.0456901
Etv3	572	7.37922e-06	3.86708e-05	0.0571151	0.0273639
Rpia	572	0.000450057	0.00174542	0.0454504	0.0376689
Exosc2	573	0.0150128	0.0411268	-0.0163878	0.0231078
Apol8	574	9.00819e-06	4.69844e-05	0.0269506	0.00442479
Ephb3	575	9.04062e-06	4.70794e-05	0.0743251	-0.0198976
H2-DMb1	575	0.0154261	0.0421545	0.0329466	0.059184
Lrig1	576	0.00311781	0.0100842	0.0347556	0.0347242
Bdp1	577	9.86179e-06	5.11948e-05	0.0924742	-0.0217719
Fads3	577	0.00103639	0.00373914	0.0315117	0.0341965
Fcgbp	578	9.99374e-06	5.17176e-05	0.16074	-0.00630751
Col12a1	578	0.0101126	0.0290737	0.0228891	0.0244403
Tsr1	580	1.04426e-05	5.38723e-05	0.0613813	0.0291701
Gm19510	581	1.06415e-05	5.48127e-05	0.0433742	0.0170914
Bhlhe41	581	0.016244	0.0442557	-0.0563747	0.0609579
Pard6b	582	1.11848e-05	5.74326e-05	0.0810455	-0.0971212
Hmgb1	582	0.016312	0.044337	-0.358012	0.0852652
Ctss	583	1.59149e-05	7.97429e-05	0.0486634	0.0308173
Chd9	584	1.22045e-05	6.25715e-05	0.0732889	0.044562
Ptges	584	0.00824343	0.0241399	0.0215032	0.0247098
Srf	585	1.22685e-05	6.28026e-05	0.0683735	-0.098041
St3gal4	585	0.00865504	0.0252903	0.0149507	0.0165792
Tlcd2	586	1.26119e-05	6.44608e-05	0.0464283	0.00294279
Vegfc	586	7.97405e-05	0.000352077	0.0204178	0.016139
Pacsin3	587	1.26988e-05	6.48047e-05	0.113815	-0.0871963
Sema4b	587	5.36057e-05	0.000243542	0.0393885	0.0274378
Mdm2	588	1.29114e-05	6.57887e-05	0.10888	0.0312639
Ppid	588	0.0169839	0.0459599	0.0326075	0.0516968
Rcan1	589	1.29399e-05	6.58325e-05	0.0669015	-0.0106607
Col9a3	589	0.0169852	0.0459599	0.0178586	0.0718681
Grwd1	590	1.31419e-05	6.67576e-05	0.0759963	0.0357585
Irx2	590	0.0170831	0.0461872	-0.178641	0.0752402
Ccdc129	591	0.0032001	0.0103201	0.0191179	0.0162057
Endod1	592	1.4661e-05	7.42466e-05	0.0616716	0.0281043
Ube2b	593	1.46842e-05	7.42504e-05	0.123431	-0.262847
Ddx18	593	0.0175627	0.0472909	-0.0119678	0.0522062
Fam83g	594	1.55537e-05	7.84079e-05	0.0572292	0.0164455
Klk1b27	594	0.0179716	0.0482508	0.00671736	0.0158755
Znhit6	595	0.0165243	0.0448226	0.0408815	0.0509271
Eepd1	596	1.63219e-05	8.16587e-05	0.0230182	0.0116253
Scd1	597	1.6937e-05	8.46085e-05	0.137754	0.047387
Emp3	598	1.817e-05	9.04949e-05	0.0374526	0.014118
1110008P14Rik	598	0.0187435	0.0500632	-0.375919	0.096522
Zwint	599	1.92228e-05	9.55944e-05	0.115337	-0.089391
Surf4	599	0.0196773	0.0523042	-0.065293	0.0826598
Ets2	600	2.00599e-05	9.95908e-05	0.1155	-0.0811958
Epas1	600	0.00209852	0.00708491	0.0325387	0.0293135
Rmdn3	601	2.033e-05	0.000100647	0.0844961	0.0225978
Isg15	601	0.0202269	0.053636	0.0907755	0.126231
Il18bp	602	2.04383e-05	0.000101032	0.0723967	0.0107722
Cnnm2	602	0.0204226	0.0540684	0.00238833	0.0203585
Map2k4	603	2.14211e-05	0.000105733	0.0839185	-0.0451741
Ehd2	604	2.16288e-05	0.000106599	0.0677608	0.0210255
Spsb1	604	0.0123414	0.034728	0.0180464	0.0214683
Bag5	605	2.17088e-05	0.000106834	0.0748227	-0.0146467
Mphosph8	605	0.00954095	0.027622	0.0458246	0.0486158
Arid4a	606	2.18552e-05	0.000107395	0.0813741	-0.0677435
Degs1	606	0.000352787	0.00140099	0.0748909	0.0589565
Blcap	607	2.28285e-05	0.000111846	0.090802	0.00214826
Rasl11b	607	0.0214652	0.0564676	0.00744369	0.0110981
Irf5	608	2.34106e-05	0.000114528	0.0180986	0.00724354
Lyn	608	0.0107384	0.0307052	0.0351073	0.0368234
C8g	609	0.0216283	0.0567615	-0.0012662	0.00957247
Sybu	610	2.44109e-05	0.000119246	0.0414696	0.0221437
Arg2	610	2.51829e-05	0.000122296	0.0385418	0.0269728
Epb41l4aos	611	2.4679e-05	0.000120323	0.0620626	-0.0439076
Matn4	611	0.0216853	0.0568659	-0.000328739	0.0135469
Ier3	612	2.4704e-05	0.000120323	0.227862	-0.0557629
Trim46	613	0.0219222	0.0573962	0.050675	0.0806823
N4bp3	614	2.57347e-05	0.000124792	0.0600412	-0.0110478
Pex5	615	2.60197e-05	0.00012599	0.0583958	0.0191661
Hnrnpa3	615	0.0223732	0.0584386	-0.240555	0.0701607
Uap1	616	2.71586e-05	0.00013074	0.101488	0.0525008
Pip5k1c	616	0.000230593	0.000955852	0.0501077	0.037771
Mphosph10	618	0.00175384	0.00600695	0.062428	0.0515261
Akirin1	619	3.06798e-05	0.000145993	0.0841497	-0.0269995
Oas3	619	0.00128069	0.00449328	0.0276704	0.0221122
Bcr	620	3.07699e-05	0.000146212	0.0589272	0.000939667
Epha7	620	0.023217	0.0603734	-0.0135418	0.0107928
Micall2	623	3.18449e-05	0.000150672	0.0693913	0.0327634
Krt80	624	3.19235e-05	0.000150828	0.0543326	-0.0343454
Odc1	624	0.0238957	0.061927	0.0101344	0.0666833
Ccdc107	625	3.46766e-05	0.00016337	0.0958663	0.0511555
Vim	625	0.0241717	0.0625444	0.0317745	0.054305
Emp2	626	3.53987e-05	0.000166535	0.114543	-0.0949414
Mier1	627	3.61189e-05	0.000169682	0.089226	0.0147631
Tubb5	627	0.0243385	0.0629268	-0.561386	0.0945074
Ptprs	629	0.00285945	0.00934898	0.0324975	0.0307364
Ccnt1	631	3.78679e-05	0.000177145	0.075973	-0.0341968
Urah	631	0.0263527	0.0677115	-0.0379955	0.0859491
Acbd5	632	0.0265584	0.0680816	0.0104131	0.0345657
Epsti1	633	0.0269281	0.0689759	-0.0101284	0.0323844
Plcd1	634	3.88821e-05	0.000180614	0.0510693	0.0318703
C530043A13Rik	634	0.0270875	0.0693306	0.0120144	0.0287096
Them5	636	4.12511e-05	0.000190815	0.0898502	-0.00508699
Hnrnpm	636	0.0273251	0.0698537	-0.143266	0.0575322
Pdgfa	637	4.47646e-05	0.000206779	0.115476	-0.0904263
Cdk14	637	0.0273341	0.0698537	-0.0159695	0.025552
Pi4k2a	638	4.50459e-05	0.000207788	0.0540585	-0.00794297
Gpm6b	638	0.000599831	0.00227565	0.0303781	0.0244878
Lmcd1	639	0.028657	0.0730654	0.0171564	0.0280451
Rsrp1	640	4.58164e-05	0.000210463	0.129918	0.0361173
Mphosph6	640	0.028789	0.0733454	-0.0221763	0.0376473
2310057M21Rik	641	4.66139e-05	0.00021383	0.0496103	0.0118569
Mgat1	642	4.71145e-05	0.000215828	0.0753485	-0.0333709
Stat3	642	0.00311054	0.0100705	0.0722497	0.0726959
Fcho2	643	4.77035e-05	0.000218083	0.0553713	0.00110831
Ssbp2	644	4.90559e-05	0.000223792	0.0292245	0.0126531
Rab15	645	0.0291051	0.0739235	-0.00930647	0.0403306
Ksr1	646	0.0292338	0.0741366	0.00391103	0.00753795
AC127341.3	647	5.49088e-05	0.000248779	0.0442472	0.0309723
Socs1	647	0.00434966	0.0136292	0.0258192	0.020854
Man2a1	648	5.68072e-05	0.000257029	0.0536795	0.0221232
Phldb1	649	5.79908e-05	0.00026167	0.0380645	0.00247678
Iqgap2	649	0.0298165	0.0755563	-0.00721031	0.0178288
Efnb1	650	6.1431e-05	0.000276815	0.0488598	-0.00434501
Pcdh17	652	6.3366e-05	0.00028476	0.0303194	0.0164017
Slc35b1	652	0.0313244	0.0790149	-0.141568	0.048429
Gfod1	653	6.48533e-05	0.000291049	0.034279	0.0102908
Kcnq1ot1	654	0.0314991	0.079395	0.024753	0.0735362
Nr1d1	655	6.54529e-05	0.000292946	0.0256196	0.0100202
Klf12	655	0.0158589	0.0433016	0.00989978	0.00864868
Gbe1	656	6.58222e-05	0.000294201	0.0357876	0.0105287
Casp4	656	0.02608	0.0671148	0.026704	0.0336448
Klf9	657	6.74311e-05	0.000300986	0.0903007	-0.132603
mt-Nd4l	658	0.0328063	0.0824388	-0.0341065	0.0738784
Samd4	659	6.93415e-05	0.000308682	0.0222305	0.0133271
Aebp1	659	0.0164178	0.0445703	0.0214068	0.023535
Ero1l	660	6.98026e-05	0.000310317	0.105395	-0.13921
Ptp4a1	660	0.00104809	0.00377439	0.0838654	0.0721991
Kdsr	661	7.69835e-05	0.000340868	0.0567235	0.0350771
Krtcap3	661	0.0334465	0.0837934	-0.0414186	0.0568518
Pik3r1	662	0.0335143	0.0838997	-0.271107	0.0441303
Phlda2	663	7.84502e-05	0.000346898	0.0335414	0.018483
Cd24a	663	0.0343668	0.0858393	0.0205263	0.0963631
Ncs1	664	0.00134015	0.00468205	0.0212468	0.0162217
Hivep1	666	7.98339e-05	0.000352077	0.0551114	-0.00443747
Tmem154	666	0.0179015	0.0481247	0.0116248	0.0133395
Asb6	667	8.16435e-05	0.000359579	0.0569478	0.0280746
Dkc1	667	0.0359469	0.0892475	0.0140383	0.0350534
Auts2	668	8.45959e-05	0.000372087	0.100496	0.0255132
Eya2	668	0.0363993	0.0902355	-0.0367185	0.0198673
Lsamp	669	0.00160344	0.00552036	0.0189679	0.0146737
Pip4k2c	670	8.63066e-05	0.000378606	0.0624603	-0.0124111
C1qtnf1	670	0.0369618	0.091493	-0.0104223	0.0205467
Smg7	671	8.80291e-05	0.000384634	0.0475263	0.0269993
Il23a	671	0.0180308	0.0483547	0.0238856	0.0240694
Vasp	672	9.0692e-05	0.000394707	0.115389	-0.284786
Mpzl2	672	0.00785322	0.0231199	0.0511223	0.0510805
Add3	673	9.34863e-05	0.000406334	0.0484454	0.00290215
Fmnl2	673	0.0376918	0.0932302	0.00202498	0.0143659
Ccdc102a	674	9.63576e-05	0.000418265	0.0316563	0.0051142
Gtf2ird2	674	0.0382699	0.0943079	-0.00276978	0.00962306
Atp6v1a	676	0.0384457	0.0946004	-0.033814	0.0574538
Hspb2	677	0.00588379	0.0179274	0.0255204	0.0230027
Ghr	678	0.000106023	0.000457822	0.0508039	0.00536903
Clca3a2	679	0.0404324	0.0992676	-0.305332	0.0862884
Anxa11	680	0.000112753	0.000485617	0.0635984	0.0169318
Frmd4a	680	0.0409767	0.100388	-0.00312326	0.02319
Hddc2	681	0.0409796	0.100388	-0.255403	0.0614474
Ddx3x	683	0.0412438	0.100885	-0.0215938	0.0697163
Spindoc	684	0.000126432	0.000543823	0.0619145	-0.0470587
Gm15860	684	0.041274	0.100885	0.000241318	0.00710147
Btd	685	0.000126626	0.000543948	0.0585252	0.0341355
Gtf3c5	685	0.017115	0.0462041	0.0242163	0.0248485
Mboat1	686	0.000131372	0.000563605	0.0917997	-0.00529842
Plekhb2	686	0.00043185	0.00168467	0.0446528	0.0325078
Il6st	687	0.000137995	0.00058936	0.0519138	-0.053631
Ndufa5	687	0.0422728	0.102998	-0.260716	0.0635242
Bach1	689	0.000142743	0.000607666	0.0617724	0.0154464
Mettl7a1	690	0.000146336	0.000622162	0.0260402	0.0150646
Apoe	690	0.00614296	0.0185973	0.0253524	0.0232321
Ddt	691	0.0434919	0.10576	-0.24087	0.062297
Diaph1	693	0.000154162	0.000653061	0.0824307	0.0115692
Rhoj	693	0.043664	0.106023	0.018493	0.0546564
Pld3	694	0.000154195	0.000653061	0.0907567	0.0443101
Gm28592	694	0.0291914	0.0740859	0.0074507	0.00878897
Smarca5	695	0.00018434	0.000776762	0.0925898	0.0454366
Gpc6	695	0.0441374	0.107015	0.0102909	0.0206576
Slc16a2	696	0.000188482	0.000793205	0.0661631	0.0342661
Slc2a6	696	0.0443364	0.107419	-0.000279945	0.00944476
Zdhhc18	698	0.000199506	0.000837471	0.0480261	-0.00211878
H2-Aa	698	0.044556	0.107794	-0.00194794	0.0663417
Zfand5	699	0.000201758	0.000845851	0.138301	-0.0735069
1700025G04Rik	699	0.0446427	0.107925	-0.0431787	0.0562304
Creb3l1	700	0.000202788	0.000849095	0.0732153	0.0187694
Srrt	700	0.0448947	0.108376	-0.0839882	0.0345307
Phactr4	701	0.000205939	0.000861199	0.0688521	0.0264567
Srgn	701	0.000422003	0.00165015	0.0281063	0.0196297
Arl13b	702	0.000220286	0.000916569	0.082583	0.0386233
Sema4a	702	0.000908811	0.00331496	0.024043	0.0173274
Mindy4	703	0.0356858	0.0887989	0.00781641	0.00977551
Mme	704	0.000425618	0.00166232	0.0249899	0.0181258
Esf1	705	0.000230907	0.000955953	0.0840691	0.0390778
Caprin2	705	0.0455168	0.109717	0.00364556	0.0123374
Ltbp2	706	0.000235849	0.000975198	0.0349246	0.021308
Dnaja4	706	0.00352354	0.0112644	0.0179902	0.0162032
Dtx3	707	0.000239856	0.000990529	0.0595143	-0.0279402
Mcm5	707	0.0459976	0.110796	-0.0760786	0.0097105
Bace2	708	0.000241495	0.000996053	0.0688901	0.0363411
Tbccd1	708	0.046433	0.111682	-0.0141989	0.00393061
Gm42418	709	0.0467491	0.112279	-0.0399846	0.0804261
Camsap2	710	0.000244243	0.00100489	0.0439613	0.0283076
Tes	710	0.0122131	0.0344548	0.0641411	0.0663927
Dirc2	711	0.000246334	0.00101223	0.0444194	-0.00701598
Grn	711	0.0230547	0.0600765	0.0582783	0.0680765
Igsf3	712	0.000268502	0.00110196	0.0971332	-0.0315839
Schip1	712	0.000988628	0.0035707	0.0131115	0.00897992
Vav3	713	0.000274029	0.00112186	0.0395199	0.0254495
Pspc1	713	0.0475976	0.114234	0.0196612	0.0323074
Rangap1	714	0.000274655	0.00112303	0.0841857	-0.00952501
Zfp462	714	0.0186697	0.0499467	0.0250691	0.0241026
Ninj1	715	0.000277371	0.00113274	0.0891594	0.003774
Plppr3	715	0.0214442	0.0564573	0.0258295	0.0257533
Wwp2	717	0.00148529	0.00514031	0.0527821	0.0414889
Arntl	718	0.000291532	0.00118473	0.0485651	-0.0128685
Trim7	718	0.049577	0.118641	-0.000207191	0.0257129
Trpv4	719	0.0496701	0.118778	0.00488249	0.00717643
Nqo1	720	0.00655248	0.019711	0.0370067	0.0348717
Gabpb1	721	0.000307975	0.00124696	0.0611479	-0.0528168
Tspan8	721	0.0109022	0.0311009	0.100454	0.0983631
Chst1	722	0.000311753	0.00125918	0.034142	0.0162682
Lgals1	722	0.0497521	0.118888	0.0336585	0.0978477
Dhx32	723	0.000318338	0.00128265	0.0787373	0.052393
Mxd1	723	0.00194904	0.00660718	0.0453164	0.0341231
Il17ra	724	0.000319181	0.00128448	0.0377293	0.0155321
Gspt1	724	0.00038393	0.00151378	0.0923411	0.0667125
Sectm1b	725	0.000329068	0.00132266	0.0587566	0.00544982
5330417C22Rik	726	0.000330373	0.00132522	0.0629052	-0.0557193
Ccl6	726	0.0515607	0.122855	-0.00960491	0.0123679
Tnfaip3	728	0.000335037	0.00134177	0.0372313	0.0044571
Mtap	728	0.0518871	0.123544	-0.0303892	0.0338878
Pcdh1	729	0.000336183	0.00134473	0.0475612	-0.0124833
Cdr2	730	0.000348034	0.00138711	0.0405299	0.0017487
Phf13	731	0.000349327	0.00138892	0.0513241	-0.0834097
Gm26890	731	0.0522188	0.124155	0.0030615	0.0124892
Dusp7	732	0.000727894	0.00271791	0.0354639	0.0242585
Prdx4	733	0.053493	0.127003	-0.143218	0.0713956
Ppp1r13l	734	0.000361751	0.00143145	0.0586711	-0.00706834
Nup153	735	0.000364249	0.00143961	0.048619	0.01148
Slc25a25	737	0.000383774	0.00151378	0.0475009	-0.0497549
Mbd3	737	0.0555833	0.131307	-0.230619	0.0536339
Armc3	738	0.00782561	0.0230591	0.00995178	0.00844757
1810013L24Rik	740	0.000389934	0.00153563	0.0735279	-0.0294359
Vwc2	740	0.0560277	0.132168	0.00444307	0.00689937
Fermt2	741	0.000395121	0.0015542	0.101936	-0.198727
Acbd4	741	0.0562394	0.132573	-0.0158758	0.0234674
Cep170b	742	0.000398294	0.00156483	0.0764101	-0.0409721
1700086O06Rik	742	0.0563955	0.132846	0.0143163	0.02477
Ubap1	743	0.000413442	0.0016205	0.0733974	-0.0327331
Grasp	743	0.056853	0.133829	0.00930185	0.0164774
Ilf2	744	0.0574821	0.134926	-0.0205057	0.0485887
Eva1b	745	0.00118207	0.00419167	0.0838414	0.0604695
Itga2b	746	0.0585927	0.137162	0.00746389	0.0124374
Fkrp	747	0.000437713	0.00170554	0.0418902	0.0177963
Gfod2	747	0.00577358	0.0176729	0.0425961	0.0356099
Smg1	748	0.000439018	0.00170861	0.0541545	-0.0134856
Spef1	748	0.060645	0.140952	0.00105866	0.00719758
Ubald1	749	0.000441623	0.00171673	0.0952573	-0.383855
Dnajb5	749	0.00401301	0.0126823	0.0155389	0.0124695
Galnt3	750	0.000445182	0.00172854	0.0877192	-0.0156807
Pde4d	750	0.0609238	0.141302	0.0202193	0.0389555
Mlec	751	0.0612563	0.141875	-0.141835	0.0453997
Kpna1	752	0.000458037	0.00177429	0.0534667	0.010797
Trmt61a	752	0.00414752	0.0130452	0.0394849	0.0357235
Stxbp1	754	0.000496183	0.0019131	0.0383706	0.0115371
Zfp428	754	0.0621873	0.143709	-0.0543645	0.0303627
Ttc36	755	0.000509608	0.0019603	0.0124698	-0.0114332
Ndufaf4	755	0.0623958	0.14391	0.0244639	0.0500314
Ccdc82	756	0.000553211	0.00211575	0.038972	0.00130899
Tmem120a	756	0.000573838	0.00218706	0.079655	0.0529772
Malt1	757	0.000556906	0.00212742	0.0300412	0.0197932
Klk1b26	757	0.00082278	0.0030312	0.038454	0.0258775
Btg1	758	0.000559744	0.0021358	0.108053	0.0149917
Rlf	761	0.000585742	0.00222986	0.0420145	-0.00720966
Pla2g7	762	0.0658889	0.150707	0.00957364	0.0143983
Cyth3	763	0.000593378	0.00225634	0.0407159	0.00494802
Dhcr7	764	0.0666568	0.152313	-0.0265707	0.0185354
Efna1	765	0.000604282	0.00228991	0.0604643	0.0152184
Naa38	765	0.0671879	0.153361	-0.220051	0.050857
Jun	766	0.000616136	0.0023295	0.144423	-0.103688
Ogfrl1	766	0.0677825	0.154611	-0.499065	0.0698777
Midn	767	0.000649391	0.00244407	0.0819779	-0.0976244
Ift80	767	0.059986	0.139812	0.00806998	0.0102628
Gadd45g	768	0.000669205	0.00251579	0.0867185	0.0420099
Homer2	768	0.06817	0.155388	-0.00554377	0.0310066
Zbtb1	769	0.0588074	0.13755	0.019812	0.0277119
Rbm12	771	0.000717796	0.00268626	0.0459436	-0.0046638
1110004E09Rik	771	0.0694046	0.158094	-0.048714	0.0289492
Prkca	772	0.06968	0.158612	0.00639187	0.0401872
Taok2	773	0.0702687	0.159842	0.01228	0.0200616
Pigr	774	0.0703546	0.159928	-0.0441239	0.0319813
Fam110c	775	0.000778915	0.00290023	0.0446929	0.00958845
Gpatch4	775	0.0704272	0.159983	-0.0555221	0.0322817
Foxn3	776	0.000781977	0.00290674	0.0578385	-0.0106737
G930009F23Rik	776	0.035235	0.087743	0.00772105	0.0080511
Slc3a2	777	0.000790575	0.00293516	0.099305	-0.0790665
Krt15	777	0.0709265	0.160896	-0.00191185	0.0117731
Fosl2	778	0.000791394	0.00293516	0.0773621	-0.0846412
Ddx24	779	0.000796744	0.0029517	0.0967344	0.0425664
Ano6	779	0.0336218	0.0841053	0.0351571	0.038814
Sik2	780	0.000820871	0.00303091	0.0384035	0.007365
Nfkbie	780	0.0358803	0.0891489	0.0123598	0.0128644
Rad52	781	0.000979212	0.00354443	0.0467299	0.0316108
Tmem67	782	0.0718164	0.162138	0.00705606	0.00991967
Sag	783	0.000833092	0.00306578	0.0172976	0.00556215
Ccnd1	783	0.0718717	0.162152	-0.102212	0.0742518
Dtna	784	0.000844104	0.00309598	0.0149523	0.00669978
Tirap	784	0.0724955	0.163337	0.0166879	0.0272457
Kmt2a	785	0.000880573	0.0032226	0.0590044	-0.0417319
Trp53	785	0.00187527	0.00638325	0.0767208	0.0560634
Ccdc71l	786	0.00088309	0.00322825	0.0713404	-0.00406463
Med22	786	0.0105374	0.0302163	0.0270473	0.023382
Mitf	787	0.0734917	0.165469	0.0030909	0.00795338
Papln	788	0.0741206	0.166771	-0.00508491	0.0202615
Cpq	789	0.000952007	0.00346109	0.0394893	0.028549
Luzp1	790	0.000959212	0.00348345	0.0773923	-0.0582616
Smap2	791	0.000972963	0.00352566	0.0603922	0.0181127
Bambi	791	0.0746747	0.167904	-0.0340397	0.0160118
Npr2	794	0.0752413	0.168769	0.00345336	0.00656684
Idh2	795	0.0758796	0.170036	-0.166141	0.0404082
Arc	796	0.00106486	0.00382199	0.0518793	-0.0214073
Crip1	796	0.076042	0.170285	-0.00846944	0.0179835
Ptrh1	797	0.00106513	0.00382199	0.0519965	-0.0127144
Rnf103	798	0.00107844	0.00386543	0.0511251	0.00260004
Srpk1	798	0.0778158	0.173553	0.0065541	0.0507345
Cnn3	799	0.00107957	0.00386543	0.0910815	-0.0763443
Foxp1	800	0.00108462	0.00387806	0.0487747	-0.00715274
Galnt18	800	0.00112851	0.00401464	0.0460174	0.0277861
Plekhm1	801	0.0710046	0.160963	0.0142037	0.0209066
Suco	802	0.0011137	0.00396621	0.0492306	0.000597343
Tmem131l	803	0.079108	0.176198	0.0103056	0.019343
Pcf11	805	0.00117862	0.00418391	0.0571114	0.0262421
Rbbp7	805	0.0810309	0.180117	0.019935	0.0563312
Amotl1	807	0.0011925	0.00422413	0.0780189	0.0418411
Mob3a	808	0.00120272	0.00425124	0.0486184	-0.0807347
Tacc1	808	0.0816244	0.181193	0.00640339	0.0243679
Yae1d1	809	0.00121209	0.00427978	0.0672582	0.0333823
Impdh2	809	0.0820834	0.18209	-0.213171	0.0549558
Mapkapk3	810	0.00121632	0.00428609	0.0509524	0.00766442
Ythdc1	811	0.00121646	0.00428609	0.0773886	0.0284543
Hsd11b1	812	0.0840908	0.185796	0.00459736	0.00901738
Pogz	813	0.0848102	0.187261	-0.00593516	0.0173083
Itgb6	816	0.0013091	0.00458808	0.0322915	-0.0113527
Gm20186	817	0.0013388	0.00468205	0.0279704	-0.0139968
Ipo5	819	0.0013677	0.00477327	0.0588818	0.00501158
Gkap1	819	0.0320227	0.0806533	0.02182	0.0221155
Alyref	820	0.0889628	0.195518	-0.192014	0.0534921
Med13l	821	0.00144396	0.005013	0.0559987	0.0320218
Lamb1	821	0.0232596	0.0604202	0.0187157	0.0164104
Tmc4	822	0.00145339	0.00504045	0.0812861	-0.0641291
Haus8	822	0.0905147	0.198533	-0.0142919	0.0189129
Map3k20	823	0.00147384	0.00510604	0.0439013	0.00661583
Mapk13	823	0.0919199	0.201111	0.0133689	0.0524483
Gm48395	824	0.0921574	0.201469	0.00710765	0.0181776
Abcb9	825	0.00148904	0.00514793	0.0279929	0.0149038
Slco1a5	826	0.00153575	0.00529834	0.0362031	-0.0158632
Akap13	826	0.092576	0.202117	0.0059557	0.0337521
Krt10	827	0.037721	0.0932328	0.0129536	0.0147618
Gm15728	828	0.0934882	0.20384	0.00572242	0.00944196
Car9	831	0.0016461	0.00566136	0.0712385	-0.149353
Nat8	831	0.094156	0.205026	-0.00419624	0.00850166
Zswim4	832	0.00166845	0.00573227	0.0453677	-0.036314
Map3k5	832	0.04925	0.118029	0.0184473	0.0226714
Fundc2	833	0.094636	0.205801	0.00254041	0.00819756
Itpripl1	834	0.00169128	0.00580467	0.0291442	0.0153668
Cdk5rap2	835	0.0976277	0.211335	-0.0150774	0.0149503
Zmiz1	836	0.0151197	0.0413515	0.0499373	0.0419097
Specc1l	838	0.00172071	0.00589957	0.0389472	0.0176459
Pgpep1	838	0.0983666	0.212379	0.00343543	0.0384003
Glis2	840	0.00175917	0.00601898	0.0212384	0.00681728
Golgb1	841	0.00178871	0.00611374	0.0800412	-0.106908
Cmc2	842	0.102496	0.220004	-0.185608	0.0264781
Arhgap23	843	0.00183934	0.0062674	0.0349456	-0.00126038
Cdh2	844	0.00732861	0.0217885	0.0154246	0.0108565
Zbtb37	845	0.10312	0.221058	-0.00718633	0.00789879
Pdgfb	846	0.00192553	0.00654089	0.0210237	0.00809775
Med13	847	0.00193476	0.0065655	0.0567202	0.00218957
Ankrd61	847	0.103409	0.22139	0.0036156	0.00718652
Mapre3	849	0.00197176	0.00667737	0.0324347	0.0135797
Gls	849	0.0178026	0.0478979	0.0359445	0.0299684
N4bp2l1	851	0.00209764	0.00708491	0.0186019	-0.0247992
Ly75	851	0.00229787	0.00769518	0.0160903	0.00993621
Phlda1	853	0.0022099	0.00744576	0.127986	-0.107721
Gm13075	853	0.109254	0.232847	-0.00675737	0.0121213
Terf2ip	854	0.110468	0.234231	0.000206732	0.0215714
Kazn	855	0.00226176	0.00760502	0.0270076	0.00260956
Bmp1	855	0.111979	0.236981	0.00584935	0.0148416
Atg2a	856	0.00226662	0.00761363	0.0339991	-0.0185206
Aph1c	856	0.11243	0.237632	-0.0163185	0.0149339
Gbp2	857	0.11283	0.238324	0.0229885	0.0450297
Sbds	860	0.0023904	0.00798086	0.0778672	-0.142143
Mras	860	0.114477	0.241341	0.0119179	0.0212367
Gab1	861	0.00246966	0.00822887	0.049268	-0.0489098
Ddah2	862	0.00249825	0.00830713	0.0263252	0.00663539
Fndc3a	862	0.0467479	0.112279	0.0398487	0.037716
Rock1	863	0.00252907	0.00838727	0.0733138	-0.03827
Zfp518b	863	0.11757	0.247075	-0.00408463	0.00798144
Zranb1	864	0.00254082	0.0084152	0.0572186	-0.00813346
Tor3a	865	0.00255724	0.00846111	0.0410352	0.0155865
Spire1	866	0.00261942	0.00865819	0.0362498	0.00681277
Ivns1abp	866	0.120092	0.251896	0.00654652	0.0365691
Klf10	867	0.00264122	0.00872154	0.0530873	-0.0324859
H2-Q6	868	0.00267271	0.00881676	0.054802	0.0105418
Dclk2	869	0.00270167	0.00890343	0.0170913	0.00204568
Selenos	869	0.121002	0.253644	-0.0290566	0.0550775
2310022B05Rik	870	0.0027292	0.00896739	0.040874	-0.087983
Krr1	871	0.0027429	0.00900344	0.0404653	0.0168509
Tcirg1	871	0.10696	0.228402	0.017544	0.0271425
Tbc1d15	872	0.00277289	0.00909288	0.0435549	0.0110592
Luc7l3	873	0.00294012	0.00959378	0.0752321	0.0500282
Ggh	875	0.127476	0.266878	0.00583585	0.0448172
Pvr	876	0.00287302	0.00938407	0.0632036	-0.0623616
Pign	876	0.127598	0.266964	0.00827359	0.0154477
Elovl5	877	0.128	0.267637	-0.0412503	0.0222354
Rubcn	878	0.128808	0.268987	0.00281282	0.0199867
Ubr2	879	0.00295869	0.00964488	0.0451852	0.0189644
Tmem40	880	0.00306234	0.0099436	0.0429568	0.00846676
Il3ra	880	0.131273	0.273516	-0.00825424	0.0067137
Abl2	881	0.00310414	0.0100596	0.0410702	0.0150721
Amotl2	881	0.00360367	0.0114984	0.0462582	0.0307459
Trps1	882	0.132069	0.274756	-0.202692	0.0389121
Il17b	883	0.132704	0.27554	-0.0538853	0.00908302
Ik	884	0.132778	0.27554	-0.117225	0.0370859
Srpr	885	0.00326877	0.010531	0.0688733	-0.0289649
Eif4e3	885	0.13287	0.275552	0.0053279	0.0144519
Gtpbp4	886	0.00332582	0.0106839	0.0761833	0.0050808
Srek1	886	0.132951	0.275552	0.0147652	0.0269936
C1ra	887	0.00333727	0.0107103	0.0108134	0.00559962
Hdac5	887	0.0206796	0.0545743	0.0315149	0.0242567
Tec	889	0.00340991	0.0109223	0.0290091	0.0106109
Ifi44	890	0.0598612	0.13962	0.0327837	0.0269311
Sspn	891	0.134946	0.278989	0.00594306	0.0104576
Spint1	892	0.00356091	0.0113729	0.0600144	-0.0797275
Gns	892	0.00790629	0.0232292	0.0407738	0.0283112
Snhg9	893	0.136701	0.282265	-0.0624286	0.00175452
Rwdd3	894	0.137416	0.283565	0.00406146	0.00834999
Foxj3	895	0.00367983	0.0117301	0.0354762	0.00181746
Pcnt	895	0.137682	0.283761	0.00687598	0.0153428
Uba6	896	0.00372155	0.0118517	0.0361111	0.00246145
Dhx33	896	0.114471	0.241341	0.00853329	0.0124097
Krit1	897	0.00373879	0.0118837	0.0551316	0.00270914
Fndc3b	898	0.00391537	0.0123856	0.0469605	-0.0127636
Sprr1a	900	0.00408803	0.0128948	0.034833	-0.0015301
Foxc1	900	0.141782	0.291485	-0.00156507	0.0209802
Kif5c	901	0.00410429	0.0129338	0.0166573	0.0058985
Plagl1	901	0.0218098	0.0571472	0.0154602	0.0122367
Ptpn18	902	0.00411186	0.0129453	0.0624178	0.0288725
Set	902	0.142925	0.293289	-0.104337	0.0502458
Taz	904	0.143918	0.29496	0.00738364	0.0265419
Izumo4	905	0.00429377	0.0134924	0.0198472	0.00787085
9330111N05Rik	905	0.0333853	0.0837034	0.0103721	0.00610438
Arhgef39	906	0.00433029	0.0135813	0.0218922	-0.0109785
Rgs2	907	0.146267	0.29885	-0.0151622	0.0176086
Slc39a13	908	0.0045242	0.0141493	0.0299293	0.0148711
Snrpa1	908	0.147393	0.300966	-0.00781662	0.0422746
Mef2a	909	0.00457828	0.014305	0.0498946	-0.0824435
Sh3bgrl	909	0.148151	0.302141	-0.00216526	0.0361295
Bnip3l	910	0.00464615	0.0145033	0.0822358	-0.259172
Aldh2	914	0.00513718	0.0158864	0.0784473	-0.0146505
Bahcc1	915	0.00521338	0.016092	0.00974878	-0.00170338
Mylip	915	0.135261	0.279465	0.0074743	0.0126444
Rhou	916	0.00529722	0.0163356	0.0567745	0.0290454
Nhp2	916	0.153796	0.31269	-0.243428	0.050636
Tma16	917	0.00542623	0.0167023	0.0432561	0.0069474
Ssbp3	917	0.0870746	0.191749	0.0248598	0.0287019
Ripk4	918	0.0055085	0.0169398	0.0439335	0.020554
Epha4	918	0.15459	0.314052	0.0046391	0.00660793
Maoa	919	0.154655	0.314052	0.00569612	0.0263846
Il11	920	0.00567292	0.0173809	0.0094339	-0.00381732
Tcim	920	0.154751	0.314053	-0.0770192	0.0399125
Tmem147	921	0.154876	0.314115	-0.317419	0.0374201
Cpsf7	922	0.00579249	0.0177144	0.0329201	0.0130134
Susd6	923	0.00580632	0.0177403	0.0444848	0.0220976
Polr3f	923	0.15608	0.315983	0.00669447	0.0153042
Sgsm3	924	0.00581464	0.0177494	0.0384448	0.0083677
Prelp	924	0.156084	0.315983	0.00116406	0.00546346
Zfp503	925	0.15634	0.31631	-0.0362401	0.024313
Foxo1	926	0.00595372	0.0181072	0.0516345	-0.0120331
Lgals9	926	0.0783852	0.174705	0.0467775	0.0421271
Ptk2b	927	0.00600341	0.0182416	0.0216763	0.00427262
Mbnl1	927	0.0175304	0.0472422	0.0333526	0.0237517
Cadm4	928	0.00601837	0.0182702	0.0419316	-0.028386
Wincr1	929	0.00603967	0.0183181	0.0826948	-0.00616655
Naga	929	0.0308523	0.0778833	0.0264909	0.0170092
Plekhg3	930	0.00610813	0.0185088	0.0420534	0.0107944
Crabp2	931	0.161378	0.32531	-0.344351	0.0569315
Tmem43	933	0.00626823	0.0189496	0.0612438	-0.0137631
Tead1	934	0.00637009	0.0192322	0.053456	-0.0622909
Pigw	934	0.0107537	0.0307052	0.0120005	0.00822137
Cbr3	935	0.00639907	0.0193021	0.0187836	0.0101247
St6galnac2	935	0.053554	0.127057	0.0114486	0.0120087
Zfp36l2	936	0.00645198	0.019444	0.0806253	-0.0307213
Ptprk	938	0.08353	0.184804	0.0347482	0.0392908
Dnajc2	939	0.167184	0.335788	-0.0306193	0.0358484
Sparc	940	0.0840324	0.185791	0.0230057	0.017181
Klf13	942	0.0067537	0.0202979	0.0819186	-0.194503
Inhbb	942	0.0307935	0.0777942	0.0152868	0.0118488
Bbx	943	0.00687903	0.0206184	0.0523213	-0.00208439
Kctd12	943	0.16951	0.33984	0.000914998	0.0123687
Sidt2	944	0.00693316	0.0207431	0.0492954	-0.045573
Lrrc26	944	0.171957	0.344121	-0.00638168	0.01601
Lgmn	945	0.00703878	0.0209833	0.0398047	0.0231694
Zfp654	945	0.00867583	0.0253166	0.0183857	0.0118619
Osbpl5	946	0.00720541	0.0214414	0.0261604	-0.0154191
Nt5dc2	946	0.173459	0.346709	-0.0247124	0.0128738
B4galt6	947	0.087184	0.191863	0.00881915	0.0103538
Pam16	948	0.174404	0.348177	-0.177257	0.0369961
1810032O08Rik	949	0.00760195	0.02248	0.0434676	0.0189858
Serpinf1	949	0.11176	0.236669	0.0108509	0.0111428
Serpine1	950	0.00761205	0.0224898	0.0217974	-0.0166743
1190002N15Rik	950	0.0880019	0.193534	0.00749453	0.0074969
Sestd1	951	0.007728	0.0227917	0.0366448	-0.00976178
Vamp1	951	0.17676	0.352243	-0.000826617	0.00742021
Nav3	953	0.0914164	0.200245	0.0248624	0.0296337
Zfp629	954	0.178305	0.355108	0.00388199	0.00945383
Bmt2	955	0.0130202	0.03636	0.0259962	0.0166232
Gsn	956	0.00787727	0.0231701	0.0580244	0.00440018
Erh	956	0.180623	0.358542	-0.20051	0.0421942
Hk2	957	0.0147445	0.0405596	0.0404577	0.0245832
Zfp36	958	0.0079114	0.0232292	0.0731507	-0.0855941
Ccdc173	958	0.180678	0.358542	-0.00867334	0.00545936
Sesn1	960	0.181071	0.359106	0.00240106	0.00668003
Ddhd2	961	0.182745	0.361993	-0.0754858	0.0104244
Zyx	962	0.00865917	0.0252903	0.0766609	-0.388045
Dek	963	0.183759	0.363783	-0.10809	0.0358101
Nabp1	964	0.137562	0.28369	0.0221195	0.0300574
Slc19a2	965	0.0208416	0.0549145	0.0170994	0.0120109
Elk4	966	0.00913282	0.0265799	0.0367768	0.0174224
Esyt3	966	0.0435942	0.105931	0.0209305	0.0147072
Heatr5a	967	0.0092268	0.0268298	0.0278043	-0.032342
Saa1	967	0.170222	0.341063	0.0266084	0.038278
Hp1bp3	968	0.00927691	0.0269519	0.0527013	-0.0241698
Hprt	968	0.18845	0.372403	-0.0537347	0.0358271
Dgat2	969	0.00930128	0.026999	0.0130776	-0.0036365
Ak2	969	0.112279	0.237463	0.0394577	0.0416992
Bcl2a1b	970	0.188969	0.373206	-0.0107859	0.011309
Prrx2	972	0.190123	0.375037	0.000794068	0.00506251
Tnk1	973	0.00981883	0.0284017	0.0435309	-0.016252
Lars2	973	0.19033	0.37513	-0.0540108	0.0144045
Rgcc	974	0.0098514	0.0284711	0.0236747	0.0110756
AC130815.2	974	0.192171	0.378254	0.00150992	0.00651355
Arhgap31	975	0.00987455	0.0285131	0.0326075	-0.000921305
Camk2d	975	0.0961507	0.20882	0.0336199	0.03325
Ell2	976	0.00990877	0.0285621	0.0697976	-0.118935
9530077C05Rik	976	0.192816	0.37922	-0.0100327	0.003432
Cpne2	977	0.0419896	0.102483	0.013226	0.0104208
Gabpa	978	0.0103429	0.0296843	0.0286857	-0.0160257
Hpn	979	0.0974152	0.211013	0.0232665	0.0246429
Zfp131	980	0.0105876	0.0303341	0.0533194	0.0159181
Nacc2	980	0.196513	0.385576	0.00284814	0.0107352
Tmem238	981	0.196816	0.385712	-0.325797	0.039037
Gas2l3	982	0.197019	0.385882	0.000949716	0.0070853
Dusp3	983	0.0107542	0.0307052	0.0363306	0.00295408
Csn1s2b	983	0.19776	0.387104	-0.0081394	0.00735383
St3gal2	985	0.0109488	0.0312069	0.0138712	0.00308841
Scarb1	986	0.011105	0.0315976	0.0512185	-0.113695
Mitd1	986	0.199499	0.390277	-0.0390945	0.0150923
Zfyve27	987	0.0112903	0.0320425	0.0312601	-0.0246973
Acin1	987	0.200053	0.391132	-0.0300666	0.0351171
Lhfpl2	988	0.200335	0.391451	0.0114073	0.0235372
Phf1	990	0.0115865	0.0328548	0.032663	-0.00826622
Dgkq	990	0.201246	0.393	-0.000286873	0.00832445
Sash1	991	0.0116896	0.0331189	0.0527673	0.0305111
Jmjd6	991	0.0137122	0.0380996	0.0671247	0.0442915
Nectin2	992	0.011857	0.0335359	0.0712038	-0.170394
Gm4951	992	0.20191	0.394063	-0.00821736	0.0071729
Fjx1	993	0.011935	0.0336988	0.0123821	0.00197099
Gsto1	993	0.202945	0.395711	-0.0174085	0.0443016
Nrp1	994	0.10961	0.233051	0.00548852	0.00690334
Plekhg5	996	0.102359	0.219853	0.00599186	0.00606435
Dnajc21	997	0.0122832	0.034623	0.0519285	-0.0837292
Whamm	997	0.20521	0.399562	-0.00810557	0.0128903
Prdm1	998	0.0123246	0.0347102	0.00799745	-0.0020407
Rnf121	999	0.0126917	0.0356834	0.0413903	0.023587
Fas	999	0.102911	0.220752	0.0085225	0.00820664
Rgmb	1000	0.0127311	0.0357637	0.0287696	0.0129911
Cycs	1000	0.206475	0.401789	-0.240635	0.0491203
Trim16	1001	0.0129623	0.0362287	0.046374	-0.0485561
Nmi	1002	0.211312	0.409517	-0.0195608	0.0177372
Zfp429	1003	0.0130534	0.0364221	0.0218071	0.00312223
Rep15	1003	0.145126	0.296886	0.00567082	0.00690537
Itsn2	1004	0.0131909	0.0367747	0.0545771	-0.0388144
Cdkl3	1004	0.211859	0.410337	-0.00387463	0.00282401
Vsig10	1005	0.0132509	0.0369109	0.0381842	-0.00166295
Tpst1	1005	0.212798	0.411795	0.00257846	0.00626134
Ceacam10	1006	0.21286	0.411795	-0.0190759	0.0295872
Sept1	1008	0.0604248	0.140637	0.0102557	0.0083974
Triobp	1009	0.0137754	0.0382432	0.0486805	-0.103447
Il15ra	1009	0.213551	0.412649	-0.00609746	0.0135059
Gm32914	1010	0.0139268	0.0385989	0.0124316	-0.00287921
Gstm1	1010	0.019291	0.0514427	0.0107016	0.00726555
Tipin	1011	0.213929	0.413139	-0.084104	0.0112438
Cln5	1012	0.0139617	0.0386336	0.0333691	-0.0359512
Timd2	1012	0.215389	0.41475	-0.00462969	0.00709066
Fbxo33	1013	0.0288706	0.0734405	0.0261761	0.0182255
Slc4a7	1014	0.216131	0.415936	0.00245009	0.0148061
Prickle3	1015	0.0141833	0.0392114	0.015834	0.00349851
Desi1	1015	0.21737	0.41735	0.0200984	0.0405769
Hgh1	1016	0.0142254	0.0392948	0.0254317	0.0151946
Fxyd5	1017	0.0146587	0.0403907	0.0220077	-0.00967333
Zbp1	1017	0.219121	0.420469	-0.000391711	0.0342828
Gm14286	1019	0.0147886	0.0406471	0.0131152	0.00477476
Col4a5	1019	0.0383726	0.0944906	0.0310306	0.0211696
Macrod1	1020	0.0148421	0.0407605	0.0256309	-0.0153098
Ly96	1020	0.0219815	0.057506	0.0306538	0.0214164
Snx17	1021	0.0149714	0.0410474	0.0760928	-0.0182898
Hal	1022	0.0150426	0.0411746	0.0213203	0.00354723
Ing2	1022	0.22508	0.430407	0.00101732	0.020331
Ube2l6	1023	0.109323	0.232847	0.0207214	0.0177531
Dnal1	1024	0.149046	0.303779	0.00474829	0.00479961
Lix1l	1025	0.227423	0.434386	-0.00412802	0.0170058
Ikzf2	1026	0.227883	0.435013	-0.0489949	0.0102932
Fubp1	1027	0.0160233	0.0437143	0.0603162	0.0210188
Rai14	1028	0.0162611	0.0442557	0.0286372	0.00962977
Ankrd13c	1029	0.0162618	0.0442557	0.0345092	0.0164612
Snhg12	1029	0.115487	0.243317	0.0155579	0.0160037
Cd164l2	1030	0.0163185	0.044337	0.0364259	0.00714046
Atxn1	1031	0.0168766	0.045741	0.0443737	-0.0128725
Bzw2	1031	0.233643	0.444471	-0.20133	0.0380103
Parp10	1032	0.234772	0.446108	-0.00897862	0.0121611
Dvl2	1033	0.117512	0.247075	0.00549893	0.00626481
Itgb5	1034	0.0171276	0.0462041	0.0363593	0.0129409
Tspan17	1034	0.0923154	0.201681	0.0229772	0.0228405
Zfp263	1035	0.0171312	0.0462041	0.0266462	0.0058273
Yjefn3	1035	0.0766337	0.171378	0.00995763	0.00831893
Nop10	1036	0.23882	0.453019	-0.32878	0.037411
3110079O15Rik	1037	0.239252	0.453579	-0.00342999	0.0103707
Ranbp1	1038	0.240447	0.455324	-0.238605	0.042376
Ccl7	1039	0.240634	0.455417	-0.00573557	0.00559009
Chl1	1040	0.0179775	0.0482508	0.0163452	0.00581622
Smim27	1041	0.144453	0.295691	0.012613	0.0167165
Qsox1	1042	0.0180912	0.0484774	0.065592	-0.0448301
Ctsa	1043	0.018296	0.0489867	0.0479839	-0.0100298
Inip	1043	0.173204	0.346408	0.0093361	0.0169894
Pon2	1044	0.245056	0.462992	-0.00588582	0.0310088
Hmg20b	1045	0.245231	0.462999	-0.131847	0.0289055
Alcam	1046	0.0187203	0.0500417	0.0256652	-0.0060144
Irf1	1046	0.245339	0.462999	-0.0197936	0.00996225
Rel	1047	0.0187739	0.0501042	0.0228975	-0.000476248
Fn1	1047	0.23328	0.444204	0.00374734	0.00699561
Gjb4	1049	0.019476	0.0518942	0.0298042	-0.0196916
Nbl1	1050	0.0195677	0.0520967	0.00961339	0.00592974
Pus3	1050	0.0519768	0.123669	0.0177845	0.0128913
Unc5b	1051	0.0196663	0.0523042	0.0218556	0.00275569
Trp53i11	1051	0.252475	0.474572	0.00563464	0.0172384
Ntrk2	1052	0.0198006	0.05259	0.0168767	0.00573503
Pcdhb7	1052	0.254533	0.477627	-0.000823277	0.00752477
Peli1	1053	0.25509	0.478403	0.00170429	0.0230685
Zfp994	1054	0.0198271	0.0526182	0.0119146	0.00262562
Snx18	1054	0.255971	0.479782	-0.0358644	0.01191
Mmp14	1056	0.0248974	0.0642213	0.0367906	0.021402
Rb1cc1	1059	0.0202564	0.0536715	0.0487812	-0.0566811
Tob2	1060	0.0204559	0.0541133	0.0321484	-0.0284
Gm26724	1060	0.259882	0.486288	0.00582053	0.0133637
Tprgl	1061	0.0206425	0.0545254	0.0587153	-0.180206
Dap	1061	0.26082	0.487493	-0.196148	0.0370433
Mlf1	1062	0.0206446	0.0545254	0.0458221	-0.0087479
Mgll	1063	0.158253	0.3194	0.0107169	0.00578249
Cidea	1064	0.0208041	0.0548593	0.0242187	-0.0882147
Prss22	1064	0.266163	0.495669	-0.076162	0.0320984
Reps2	1065	0.157497	0.318455	0.00863145	0.0116742
Tiam2	1066	0.0833716	0.184577	0.0151707	0.0127558
Tmem68	1068	0.097735	0.211429	0.0162216	0.0138297
Urb1	1069	0.0797222	0.177327	0.0115842	0.00854133
Zcchc6	1070	0.0216021	0.0567507	0.0495159	-0.0253902
Rai2	1070	0.134869	0.278989	0.00662559	0.00520822
Dyrk1a	1071	0.0216071	0.0567507	0.0302021	0.00526125
6330418K02Rik	1073	0.271008	0.503408	-0.000383951	0.00459602
Nrarp	1074	0.0289433	0.0735688	0.0126806	0.00654705
Fam212b	1075	0.0221492	0.057899	0.0245124	-0.0113249
Timm8a1	1076	0.273887	0.507902	-0.0966045	0.033696
Ifi207	1077	0.0224189	0.0585118	0.0109015	0.000388635
Bok	1077	0.274228	0.50825	0.000615392	0.00332554
Itgb1	1078	0.0226903	0.0591735	0.0580031	0.0264578
Rtp4	1079	0.274826	0.509072	-0.0709613	0.0313601
Tfap2b	1081	0.27531	0.509072	-0.0319491	0.0123685
Slbp	1082	0.0230786	0.0600913	0.0450084	0.0242632
Ncoa3	1082	0.275844	0.509534	-0.0095045	0.0127912
Tspan7	1083	0.0232233	0.0603734	0.0476599	0.0191113
Gmnn	1085	0.278492	0.513853	-0.0619607	0.0107374
Nup98	1086	0.0234738	0.0609287	0.0228295	0.0108027
Tjp1	1087	0.0238686	0.0619052	0.0447069	-0.0488238
Synpo	1087	0.27949	0.515408	-0.00364384	0.00827527
Heg1	1088	0.0241282	0.0624806	0.0259924	-0.00500749
Anpep	1088	0.279736	0.515573	0.00244586	0.010026
Spaar	1089	0.280187	0.516118	-0.00629229	0.00658802
Ric1	1090	0.0247472	0.0639335	0.0185642	-0.0112954
Gm12216	1090	0.281127	0.517561	-0.0122823	0.00750827
Iqcb1	1091	0.024779	0.0639659	0.0194753	0.00290846
Snrpd3	1092	0.286768	0.527068	-0.152447	0.0342007
Zdhhc20	1093	0.0251158	0.0647342	0.0413748	-0.0182237
Rab34	1094	0.0255451	0.0657895	0.0324291	0.0165399
Ccdc88a	1094	0.288368	0.528946	-0.0266325	0.0233871
Rab11fip5	1095	0.0262185	0.0674191	0.0395376	-0.0183639
Trio	1096	0.0264837	0.0679954	0.0353697	0.00583973
Klc1	1097	0.0265251	0.0680488	0.0437436	0.021666
Smc3	1097	0.293457	0.537136	0.00589894	0.0254275
Slc6a8	1098	0.027408	0.0699886	0.0434878	0.00904121
Irx1	1098	0.293544	0.537136	-0.292907	0.036134
2610037D02Rik	1099	0.0274601	0.0700676	0.0255343	-0.000500465
Cavin2	1100	0.0288659	0.0734405	0.0368936	0.0129767
Aqp3	1100	0.294956	0.539422	-0.000568763	0.00613343
Ndufab1	1101	0.296711	0.542033	-0.470742	0.032821
Angel1	1102	0.297139	0.542516	0.00140968	0.00483548
P2rx4	1103	0.297519	0.54291	-0.0130409	0.0315913
Mob3c	1105	0.030617	0.0774562	0.0286788	-0.0271563
Znrd1as	1105	0.298254	0.543953	-0.0118256	0.00691159
Pdrg1	1106	0.0306185	0.0774562	0.0514562	-0.0192052
Msl1	1107	0.0306363	0.0774562	0.0407472	0.0139793
Lsm6	1108	0.302064	0.549523	-0.192386	0.0258599
Traf1	1111	0.0323062	0.0813057	0.0102683	0.00177682
Klhl24	1112	0.0323698	0.0814039	0.0415784	0.0201676
Tmem184b	1113	0.0330461	0.0829786	0.0191531	-0.0163094
Cryba4	1114	0.152918	0.311288	0.00753965	0.00706177
Tex10	1115	0.0333535	0.083687	0.0248388	-0.0215647
Lpin1	1115	0.308236	0.559078	-0.00485219	0.00612642
Fos	1117	0.309651	0.560724	-0.199977	0.0482536
Mcm7	1118	0.309856	0.560789	-0.0514545	0.0126296
Tmem14c	1119	0.310094	0.560913	-0.242569	0.0307407
Cxcl2	1121	0.0342966	0.0857285	0.0469286	0.0146202
Csf1	1121	0.155354	0.314891	0.0294057	0.0244142
Rnf130	1122	0.0346113	0.0863847	0.0337736	0.0217349
Zfp61	1122	0.0712083	0.161204	0.00674795	0.00336768
Tubb2a	1123	0.0347134	0.0865743	0.0840576	-0.0679162
Gm35909	1123	0.311218	0.562373	-0.0089786	0.0156532
Ikzf5	1124	0.0349979	0.0872182	0.0263289	-0.0155113
Hist1h1e	1124	0.311371	0.562373	-0.0872919	0.00917065
Psma4	1125	0.311411	0.562373	-0.235013	0.0316394
Id1	1126	0.0972121	0.210711	0.0232009	0.0197104
Kif13b	1127	0.0358662	0.0891489	0.0244316	0.00175658
Kdelr3	1128	0.0363371	0.0901487	0.0148398	-0.0175818
Zbtb2	1129	0.0367054	0.0909262	0.0202561	0.00405185
Naf1	1129	0.275318	0.509072	0.00645446	0.0129085
Rnf187	1130	0.3161	0.569289	-0.231339	0.0233119
Rab7b	1131	0.0378433	0.0934652	0.0459026	-0.0946638
Fgd6	1132	0.0379604	0.0936848	0.0334823	-0.0107009
Afdn	1133	0.038124	0.0940183	0.0454943	-0.0535887
Srebf1	1133	0.319674	0.5751	-0.00223383	0.0210247
Ptpn14	1135	0.0387795	0.0953509	0.0112869	-0.00831122
Flvcr1	1136	0.0622219	0.143709	0.0156409	0.0105898
Cbx6	1137	0.0389837	0.0957819	0.0105357	-0.00860054
Cnp	1137	0.321837	0.578363	-0.0430216	0.0154848
Jam2	1138	0.075263	0.168769	0.0121572	0.0083792
Ccdc186	1139	0.0404633	0.0992699	0.0388945	-0.00556021
Exosc8	1139	0.323753	0.581177	-0.0406607	0.0181263
Dmtf1	1140	0.0410892	0.100582	0.0280458	-0.0165808
AU020206	1141	0.189368	0.37377	0.0178687	0.0141322
Dll1	1142	0.0415259	0.101426	0.0116372	0.0063826
Map3k2	1142	0.326537	0.5844	-0.0018074	0.0172217
Pgf	1144	0.0420284	0.102502	0.0513592	-0.0402995
Smchd1	1144	0.327178	0.585105	0.00391434	0.0182005
Phf3	1145	0.0422939	0.102998	0.0448988	-0.0355138
Mybl1	1145	0.328176	0.586279	0.000400819	0.0108056
Nfil3	1146	0.0424252	0.103242	0.0151689	-0.00872475
B930036N10Rik	1147	0.328556	0.586279	-0.0861525	0.0115857
Stk40	1149	0.044001	0.106763	0.0454729	-0.050292
Serp1	1149	0.32872	0.586279	-0.214756	0.0350056
Kdm3b	1150	0.0445035	0.107745	0.0200212	0.00942522
Gorab	1151	0.044865	0.108376	0.0197353	-0.0206033
Dhrs7	1151	0.330209	0.588301	-0.086604	0.0212015
Anxa9	1152	0.192211	0.378254	0.00516039	0.00729627
Sdc3	1153	0.0450087	0.108572	0.00947995	0.00311527
Phyh	1153	0.331043	0.589469	-0.0099207	0.00563607
Atp11b	1154	0.0460344	0.110804	0.031577	0.00640167
Glul	1154	0.303084	0.550639	0.00165265	0.00624551
Kansl1l	1157	0.168106	0.337436	0.0124822	0.0121503
Mdk	1158	0.0488059	0.117049	0.00721258	-0.00443685
Crlf2	1159	0.171309	0.343032	0.0145658	0.0196279
Ilvbl	1160	0.0494157	0.11834	0.0272883	0.0140732
Fkbp14	1160	0.131308	0.273516	0.00886696	0.00572741
Angptl4	1161	0.0499425	0.119257	0.0120583	-0.00306648
Hhipl2	1162	0.342069	0.607144	-0.00362222	0.023303
Fbxo30	1163	0.0506542	0.120869	0.0297624	-0.0454168
Mid1	1163	0.114452	0.241341	0.0203073	0.0111218
Inafm1	1164	0.0510086	0.121627	0.0209963	-0.0236508
Gpsm3	1165	0.343258	0.608897	-0.0141636	0.0113752
Itpr2	1166	0.0927025	0.20226	0.0227922	0.0167066
Wdr44	1168	0.053161	0.126305	0.0256846	-0.0129126
Brd3	1169	0.351778	0.621712	-0.0265115	0.0172899
March7	1170	0.05362	0.127122	0.0411675	-0.0810964
Esd	1172	0.0536665	0.127141	0.0618115	-0.112671
Trmt13	1173	0.353018	0.622906	0.00173053	0.0114102
Abcc1	1174	0.0539915	0.12782	0.0179628	0.00300015
Trp53bp2	1175	0.0544849	0.128896	0.0351113	-0.00159658
Tceal9	1175	0.354462	0.624788	-0.290189	0.0399253
Npm3	1176	0.355213	0.625115	-0.214964	0.032245
Pcgf5	1177	0.0551325	0.130335	0.0329114	0.00752619
Irs1	1177	0.356738	0.627132	-0.0206456	0.00465071
Igf1r	1178	0.0557667	0.131646	0.0087871	-0.00943856
Xxylt1	1178	0.226642	0.433143	0.00421807	0.00546682
Sema4d	1179	0.0569055	0.133857	0.0173727	-0.000963189
Slc26a10	1180	0.0570757	0.134162	0.01647	0.00435259
Tra2a	1181	0.0574135	0.134861	0.0456146	0.00399696
Sfmbt1	1182	0.0576345	0.135129	0.0160975	0.00349058
Tango6	1182	0.359491	0.631567	-0.00475141	0.006422
Meis3	1183	0.0576501	0.135129	0.0108126	0.00791184
Ndufa10	1183	0.359642	0.631567	-0.225956	0.0309459
Phf23	1185	0.0586005	0.137162	0.0393766	-0.00452127
Anapc13	1185	0.361228	0.633518	-0.179225	0.02909
Phf11d	1186	0.058913	0.137637	0.0474671	-0.00674491
Nasp	1186	0.361327	0.633518	-0.0548918	0.0216691
Star	1187	0.058928	0.137637	0.0080537	0.00194639
C030034I22Rik	1187	0.231948	0.442009	0.00340283	0.00497664
Casz1	1188	0.059649	0.139223	0.0400864	-0.127248
Wnk1	1189	0.0991792	0.213716	0.0392037	0.0290408
Znrf2	1190	0.0601484	0.140092	0.0332966	0.00670578
Piga	1190	0.3662	0.640968	0.00135188	0.00609443
Shroom3	1191	0.139938	0.288231	0.0274026	0.0184979
Anp32b	1192	0.366351	0.640968	-0.378727	0.035221
Daam1	1193	0.0606081	0.140952	0.0412501	-0.114208
Cd109	1193	0.25018	0.471282	0.00546963	0.0094371
Ypel3	1194	0.0608546	0.141302	0.0390756	-0.21676
Zfp949	1195	0.0608822	0.141302	0.0211702	-0.000488781
Cebpa	1195	0.184392	0.364818	0.0195132	0.0162448
Stim1	1196	0.06104	0.141473	0.0201839	0.0115747
Sh2b2	1197	0.0616032	0.142579	0.00769699	-0.000101736
Cirbp	1197	0.370015	0.646355	0.0012362	0.0157479
Spred3	1198	0.0617815	0.142891	0.0102142	0.000923028
Tsc22d4	1200	0.0622879	0.143761	0.0423577	-0.116791
4932422M17Rik	1200	0.372632	0.649557	-0.00596937	0.00418194
Gk	1201	0.0624395	0.143911	0.0412333	0.00501486
Dhrs3	1201	0.376227	0.655133	0.00154728	0.0113341
F2rl1	1202	0.0626371	0.144266	0.0323693	-0.0880477
Nudcd2	1202	0.376734	0.655672	-0.205115	0.0195596
Map2	1203	0.0632344	0.14554	0.0257155	0.00704797
Trmt1l	1203	0.377314	0.656335	-0.00116441	0.0120473
Qk	1204	0.0636744	0.146451	0.028922	-0.0519688
Sema4c	1204	0.377793	0.656825	-0.00114916	0.0041511
Gan	1205	0.0641903	0.147535	0.0201232	-0.0176388
Fscn1	1205	0.315218	0.568629	0.00233442	0.00432337
Gar1	1206	0.0643495	0.147799	0.0489714	0.0217904
H2-Q7	1206	0.379507	0.659112	-0.0286679	0.0322851
Meltf	1207	0.06532	0.149924	0.0222773	0.0117331
1600014C10Rik	1207	0.190397	0.37513	0.0073976	0.00683452
Ehbp1l1	1208	0.0653784	0.149954	0.0156845	-0.00658581
Gm17619	1208	0.38123	0.66141	-0.0103855	0.00791394
Bik	1209	0.0655134	0.150159	0.0284401	-0.0777
Pclaf	1210	0.382815	0.663814	-0.330058	0.00545717
Slc25a37	1211	0.0656574	0.150385	0.0168933	-0.00225813
Klhdc7a	1212	0.0658119	0.150635	0.00899147	0.00247871
Tubg1	1212	0.384955	0.666826	-0.0914305	0.00671891
9130019O22Rik	1213	0.066683	0.152313	0.00971349	-0.00133195
Pdcd7	1216	0.0706891	0.160468	0.0230452	-0.00878653
Asap1	1217	0.0710654	0.160991	0.0325756	0.0168636
Garnl3	1217	0.0999261	0.215185	0.00875764	0.0058765
Eri1	1218	0.196214	0.385217	0.0152222	0.0147219
Ldlr	1220	0.0714426	0.161624	0.0405481	0.00450144
Smc1a	1220	0.396016	0.682794	-0.10028	0.0218275
Atp13a3	1221	0.0714971	0.161637	0.0360166	-0.00345731
Mafb	1221	0.396029	0.682794	-0.0408082	0.0257162
Man1a	1222	0.071652	0.161877	0.0164509	0.00747478
Diaph2	1223	0.0719688	0.162261	0.0160385	-0.00481803
Aifm2	1223	0.141557	0.291203	0.0148578	0.010022
Lin54	1224	0.0748095	0.168093	0.0159361	0.00622349
2510017J16Rik	1224	0.262477	0.489209	0.00349053	0.00452491
Zmym5	1225	0.0751467	0.168736	0.0340066	-0.0118688
Chchd7	1225	0.39981	0.686811	-0.0129056	0.0148096
Cadm1	1226	0.401315	0.689039	-0.00454766	0.0153507
S100a7a	1227	0.0762668	0.170673	0.0110202	0.000189034
Arhgap5	1229	0.0769179	0.171897	0.045315	-0.0198541
Slfn2	1229	0.202993	0.395711	0.0192526	0.023508
Tet3	1230	0.0775769	0.173253	0.0391853	-0.0306697
Skil	1231	0.0777938	0.173553	0.0393169	-0.0171005
Ppwd1	1232	0.408858	0.698652	-0.00271375	0.00984202
Spns2	1233	0.412663	0.70378	-0.0143236	0.0171992
Tmem240	1234	0.0792386	0.17637	0.00650183	0.00360618
Sult2b1	1236	0.08153	0.181105	0.019489	-0.0458227
Tead4	1237	0.0823124	0.182476	0.0225158	-0.0274505
Mrpl18	1237	0.413525	0.704117	-0.21725	0.020228
Bsdc1	1238	0.0826067	0.183006	0.0315325	-0.034382
Cpd	1238	0.413654	0.704117	-0.0691939	0.010814
Gcfc2	1239	0.413867	0.704117	-0.00923978	0.00173097
Ndufs6	1240	0.415157	0.705852	-0.520794	0.0254607
Entpd2	1241	0.415602	0.706247	-0.00218125	0.0057538
Bmp2k	1243	0.0858624	0.18945	0.0182465	-0.0224223
Amn1	1243	0.416165	0.706477	-0.0383694	0.0123456
Pcdhb9	1244	0.085916	0.18945	0.00627074	0.002969
Irak3	1245	0.086496	0.190602	0.0183231	-0.0342291
Cbx5	1246	0.418808	0.7106	-0.085102	0.00992889
Pla2g16	1248	0.419828	0.71155	-0.178249	0.0253319
Nes	1249	0.090289	0.198282	0.0499608	-0.0329162
Tanc1	1249	0.420531	0.712064	-0.00158671	0.013225
Zfp281	1250	0.0903403	0.198282	0.0209249	-0.00637261
Uap1l1	1251	0.091389	0.200245	0.0269727	-0.013768
Orai1	1251	0.103242	0.221177	0.0649196	0.0316626
Tmx4	1252	0.0919332	0.201111	0.0158579	0.00533405
Gja1	1254	0.222786	0.426513	0.0104056	0.0133479
Dlgap4	1255	0.0938016	0.204389	0.0375836	-0.0331008
Eml4	1255	0.426969	0.720755	0.00108374	0.00823383
Znfx1	1256	0.0945118	0.205666	0.0220959	0.000311332
Cutal	1257	0.0950079	0.206474	0.0151718	-0.00996744
St6galnac4	1257	0.214585	0.414154	0.00419868	0.00441233
Pnn	1259	0.0965575	0.209566	0.0477004	0.0242033
Gm26699	1259	0.431481	0.727629	-0.0214068	0.0102527
Wdr54	1260	0.0968476	0.210058	0.00926115	0.00197643
Rrnad1	1261	0.308762	0.559419	0.00522406	0.00916456
Fbxl14	1262	0.15777	0.318813	0.0149683	0.0105847
G3bp2	1263	0.440577	0.740707	-0.0138727	0.0180525
Rassf8	1264	0.0981463	0.212131	0.0264347	-0.0441102
Psph	1264	0.441164	0.741316	-0.0861345	0.0120843
Cnot6l	1265	0.0981874	0.212131	0.0245846	-0.00768113
Junos	1266	0.405716	0.694701	0.00074441	0.00490792
Chd6	1267	0.0989544	0.213509	0.0222731	-0.00118354
Socs2	1267	0.448324	0.752278	-0.0827711	0.0163778
Tmcc3	1268	0.09911	0.213706	0.0203401	-0.0209045
Tspan6	1268	0.449369	0.753575	-0.0145909	0.0117014
Zfp764	1269	0.450129	0.754468	-0.00502222	0.0043124
Plxnb2	1271	0.452933	0.756487	-0.0202255	0.0142039
Fn3k	1272	0.101686	0.218728	0.0058635	-0.0107771
Upf2	1273	0.101703	0.218728	0.0219409	-0.00644923
Hagh	1273	0.394164	0.680287	0.00224177	0.0208401
2810454H06Rik	1274	0.456135	0.761067	-0.00533956	0.00355393
Ankrd12	1275	0.102224	0.219706	0.033539	-0.0631087
Trim21	1276	0.456625	0.761501	-0.0142127	0.00145887
Tgfbr3	1277	0.105496	0.225713	0.00722166	0.0021576
Nectin3	1278	0.106096	0.22685	0.0164155	-0.0303129
D830025C05Rik	1278	0.173994	0.347567	0.0105408	0.00710494
Ulk1	1279	0.106196	0.226918	0.0166595	-0.00226128
Stom	1281	0.10779	0.230025	0.0155684	-0.00852706
Notch2	1281	0.231243	0.440919	0.00984938	0.00661629
Fam208b	1282	0.108073	0.230482	0.0178993	-0.00545285
Tpx2	1282	0.463875	0.771649	-0.0544812	0.0020875
Galnt11	1283	0.368963	0.644857	0.00415525	0.00919747
Pnisr	1284	0.464928	0.773013	-0.00343321	0.0198238
Zrsr1	1286	0.471273	0.781384	-0.00267742	0.00641605
Cox17	1287	0.471581	0.781384	-0.217705	0.0226286
H2afv	1288	0.471615	0.781384	-0.0891028	0.0222293
Ctla2a	1289	0.109646	0.233051	0.00441447	-0.0630227
Nebl	1290	0.109767	0.233051	0.0152565	-0.00757927
Vdr	1290	0.473706	0.784457	-0.0664963	0.0139761
Hspb6	1291	0.10977	0.233051	0.0125803	0.00144999
Hspa2	1292	0.109771	0.233051	0.0232967	0.00365365
Ifit3	1292	0.126973	0.265993	0.0266438	0.0119709
Gsdme	1293	0.110187	0.233785	0.0139642	0.0021996
Thbs1	1293	0.476165	0.788135	-0.0526954	0.0217775
Cnnm4	1294	0.111096	0.235413	0.0133463	-0.000336511
Hoxb3os	1294	0.477024	0.789162	-0.00406809	0.00303142
Plod2	1296	0.116317	0.244908	0.00906824	-0.00878276
Krt14	1296	0.480635	0.794343	-0.0162571	0.00661523
Pbxip1	1297	0.482425	0.796903	-0.0277437	0.0082406
Med26	1298	0.11732	0.246863	0.0142628	-0.00201295
Arhgef25	1298	0.222269	0.42577	0.0060153	0.00414736
Tgfb3	1299	0.485699	0.801513	-0.00764104	0.012402
Sesn3	1300	0.486106	0.801784	-0.0500035	0.0101917
Dedd2	1301	0.118119	0.248073	0.0227651	0.00570973
Pold4	1302	0.11994	0.251737	0.0336042	0.0101621
Zfp207	1302	0.487634	0.803905	-0.0431768	0.0196624
Cxxc5	1305	0.206758	0.401906	0.0168526	0.0112979
Retreg1	1307	0.128296	0.268087	0.0303401	-0.0265931
Vrk2	1308	0.495476	0.813593	-0.0154918	0.00370926
Sun1	1309	0.130723	0.272812	0.0184272	0.000378497
Cngb1	1309	0.497197	0.816014	-0.00080035	0.00528777
E2f5	1311	0.13122	0.273516	0.0224473	-0.0178753
Nipal2	1311	0.498334	0.817361	-0.00831325	0.0177673
Chd8	1312	0.498511	0.817361	-0.0146395	0.011931
Vamp3	1313	0.131886	0.274549	0.0285989	-0.0921112
Nucks1	1313	0.500673	0.8205	-0.225507	0.0168729
Creb3l2	1314	0.501695	0.821767	-0.00799352	0.00664616
Nsmf	1315	0.132712	0.27554	0.0213485	-0.0108753
Nars	1315	0.251121	0.472441	0.0249725	0.0239093
Pkp2	1316	0.132715	0.27554	0.0303161	-0.0112567
Vgll4	1316	0.251198	0.472441	0.0176025	0.0165186
Morc3	1317	0.134116	0.277794	0.0189075	0.00269196
Taf7	1318	0.134604	0.278631	0.0315962	-0.0476771
Depdc7	1318	0.50529	0.825615	-0.0180546	0.00343486
Hes1	1319	0.217013	0.416907	0.0365926	0.032949
Swap70	1321	0.140942	0.290119	0.0241685	-0.0904048
Rab21	1321	0.253463	0.47616	0.013857	0.0138107
Chst2	1322	0.50746	0.828751	-0.0239992	0.00830566
Rassf4	1323	0.509805	0.832015	-0.0132632	0.00723903
Fosb	1325	0.142023	0.291799	0.0336047	-0.000318509
Sh3bp4	1326	0.142527	0.292653	0.016296	-0.017873
Rilpl2	1326	0.512754	0.835748	-0.0179946	0.00792838
Tmcc1	1327	0.143068	0.293399	0.0249465	-0.00352116
Cenpc1	1327	0.514617	0.837159	-0.0040828	0.00748575
Tmem97	1328	0.51463	0.837159	-0.0856845	0.00688542
Gm7694	1329	0.144324	0.295611	0.0103453	-0.000740322
Clock	1329	0.25903	0.485104	0.0144763	0.0137153
Rara	1330	0.145865	0.298212	0.0158204	-0.0233629
Bbs2	1331	0.408347	0.698217	0.000645671	0.00281671
Gt(ROSA)26Sor	1332	0.147778	0.301566	0.0295874	0.00562607
Gm34006	1333	0.519821	0.844772	-0.0187189	0.00440302
Elovl7	1335	0.152375	0.310372	0.0229956	-0.0320666
Bbs4	1335	0.262122	0.489192	0.00381887	0.000364306
Pard6g	1336	0.262282	0.489192	0.00311045	0.0038267
Ly6d	1337	0.153633	0.312551	0.0264512	-0.0460137
Uck2	1337	0.26232	0.489192	0.0174805	0.0165993
Cited4	1340	0.531364	0.859735	-0.0405547	0.0056954
Usp1	1341	0.533797	0.863249	-0.055999	0.00946972
Pithd1	1342	0.158133	0.319352	0.0303377	-0.03234
Commd3	1342	0.535352	0.865342	-0.13807	0.0195705
Msmo1	1344	0.289296	0.530243	0.00999981	0.0146643
Hsdl2	1345	0.539991	0.871989	-0.0954662	0.0105373
Gbp9	1346	0.159778	0.322281	0.0154642	-0.00687602
Tulp4	1347	0.161792	0.325945	0.0283076	-0.0313049
Gm26601	1347	0.543593	0.876098	-0.00403915	0.0019464
Fam221a	1348	0.162227	0.326623	0.0074444	0.000192443
Klhdc1	1349	0.243267	0.460136	0.00950443	0.00651176
Tln1	1350	0.163926	0.329844	0.0315173	0.00946393
Slc34a2	1350	0.545896	0.878953	-0.00583421	0.0039873
Zfp467	1351	0.164141	0.330075	0.00573852	-0.0168905
2610301B20Rik	1351	0.546223	0.879053	-0.0107876	0.00337125
Usp2	1354	0.165509	0.332624	0.0149371	-0.00764353
Tecpr1	1354	0.554217	0.888894	-0.00522673	0.00737501
Itga6	1355	0.169449	0.33984	0.0321404	-0.0580048
Sectm1a	1355	0.554518	0.888946	-0.0195893	0.0104331
Sp100	1356	0.277559	0.512416	0.00898458	0.00235903
Frk	1357	0.494934	0.813226	-0.000611661	0.0100572
Ahnak2	1358	0.175408	0.349971	0.022851	-0.0296044
Slc48a1	1358	0.340223	0.604192	0.00299639	0.0110649
Mcfd2	1359	0.175523	0.349989	0.0410224	-0.183845
Gm527	1360	0.178449	0.355183	0.010362	-0.0117658
Casp8ap2	1360	0.564159	0.899612	-0.0218638	0.00626759
Pdcd4	1361	0.178805	0.35548	0.0224232	0.00645516
Ptger4	1362	0.178813	0.35548	0.0168428	-0.026311
Ctsh	1362	0.567468	0.904018	-0.0176609	0.0230279
Acsl1	1363	0.18034	0.3583	0.0191695	-0.00745417
Agpat5	1364	0.182244	0.361216	0.0161961	-0.0190599
Naa10	1364	0.570561	0.907637	-0.236693	0.0136396
Arhgap6	1365	0.421311	0.712534	0.00162815	0.00558904
Rpa3	1366	0.574794	0.913931	-0.0966319	0.00715545
Mir17hg	1367	0.185955	0.367691	0.00718863	-0.0188213
Mfsd7a	1367	0.249161	0.469943	0.00671697	0.00380913
Srpk2	1368	0.577539	0.917415	-0.060978	0.016375
Bclaf1	1369	0.578868	0.919085	-0.00801706	0.016164
Ssrp1	1371	0.584368	0.925157	-0.149415	0.0161543
Rad21	1372	0.193038	0.379431	0.0228834	-0.0897792
Tmem108	1372	0.585897	0.927134	-0.00791191	0.000194907
Csn1s2a	1373	0.587579	0.928672	-0.186031	0.00847758
Serpina3n	1374	0.196727	0.385712	0.0065357	0.00293795
Gramd1a	1375	0.195568	0.384177	0.0196452	-0.00286156
Snrpg	1375	0.588157	0.928672	-0.38526	0.0181032
Spc24	1376	0.588271	0.928672	-0.17953	0.00316697
Pik3ip1	1380	0.591109	0.93182	-0.00954849	0.00505552
Arhgef26	1381	0.204766	0.398933	0.0158967	0.0032407
Slc39a4	1381	0.594442	0.935738	-0.019144	0.00373734
Lyar	1382	0.595974	0.937258	-0.0584379	0.0157895
Cir1	1384	0.206778	0.401906	0.0221676	-0.0400171
Itga2	1384	0.356185	0.626492	0.000749263	0.000904141
Jund	1385	0.206951	0.401944	0.0299901	-0.102122
Smg9	1385	0.420946	0.712403	0.00331267	0.00872545
A330041J22Rik	1386	0.20704	0.401944	0.00610181	0.00292693
Fut8	1388	0.40743	0.697009	0.000439669	0.007758
1700019L13Rik	1389	0.210451	0.408326	0.00459614	-0.00466069
Kdm5a	1390	0.210659	0.408491	0.0262512	-0.0828739
Mmgt2	1391	0.304749	0.553058	0.0075263	0.00677664
Ass1	1392	0.609633	0.955002	-0.129214	0.018045
Dst	1393	0.213537	0.412649	0.0222057	0.0077918
Emb	1393	0.612391	0.958073	-0.0465111	0.00747098
Tigd2	1394	0.613876	0.959942	-0.0646958	0.00803067
Usp27x	1395	0.214793	0.414154	0.0068713	0.000278781
D17H6S53E	1395	0.614395	0.960035	-0.00759292	-2.07616e-05
Maged1	1396	0.21483	0.414154	0.027926	-0.00119301
Pmf1	1396	0.614805	0.960035	-0.176157	0.00613933
Rab2b	1397	0.215112	0.414456	0.00922527	-0.00468109
Hsf2	1398	0.32605	0.584349	0.0027297	0.00189963
Fam208a	1399	0.216485	0.416375	0.0134912	0.00170921
Proser1	1399	0.617524	0.963372	-0.0288794	0.00696614
Cblb	1400	0.216613	0.41638	0.0113405	-0.0143054
Carf	1400	0.621214	0.968445	-0.00574744	0.000684596
C1qbp	1401	0.62136	0.968445	-0.221481	0.0172633
Gm29666	1402	0.622958	0.970022	-0.00879935	0.00275269
Itih4	1403	0.220215	0.422323	0.00594978	-0.00706975
Rab43	1403	0.287658	0.52841	0.00539573	0.00325536
Ptbp3	1405	0.221691	0.424908	0.0329828	-0.0584304
Gm16536	1407	0.223064	0.426799	0.00589904	-0.000881966
Ppp1r10	1411	0.229741	0.438308	0.0212854	-0.00706421
Dsp	1412	0.233368	0.444204	0.0148754	-0.00783365
Fmr1	1412	0.503418	0.823775	-0.000316301	0.00854499
Map1lc3a	1413	0.233989	0.444875	0.0383775	-0.318167
Bin1	1413	0.635889	0.984365	-0.135255	0.0136259
Notch1	1414	0.235811	0.447824	0.0140714	0.00581273
Mki67	1415	0.638137	0.986699	-0.105542	0.00221922
Rnf225	1416	0.236568	0.449004	0.00394057	0.000361411
Ccl17	1418	0.239977	0.454694	0.00490948	-0.00393909
Large2	1418	0.643582	0.993727	-0.00441241	0.0035987
Ube2q2	1422	0.243661	0.460619	0.0158815	-0.0167815
Bora	1422	0.648547	0.999064	-0.0153216	0.00257129
2310001H17Rik	1423	0.271589	0.504205	0.00899488	0.00455058
Tgm2	1425	0.649712	0.999929	-0.0509753	0.0081572
Agfg1	1426	0.249415	0.470154	0.0282801	-0.0648829
Ktn1	1427	0.250297	0.471282	0.0267065	-0.0637211
Prpf18	1427	0.267831	0.498067	0.0127065	0.00635612
Rassf10	1428	0.650771	1	-0.00572198	0.00233157
Zfp513	1430	0.254054	0.477	0.0147069	0.00438034
Nampt	1430	0.653255	1	-0.0152549	0.00716291
Rbpms	1431	0.259103	0.485104	0.021969	-0.0711821
Per3	1431	0.653671	1	-0.00513595	0.00297399
Echdc3	1432	0.260684	0.487493	0.0107047	0.00478005
Slc25a29	1432	0.656124	1	-0.00598828	0.00327802
Cebpg	1433	0.26139	0.488281	0.032699	-0.116775
Zc3h7a	1434	0.266243	0.495669	0.0168818	-0.0202015
Reck	1436	0.267406	0.497556	0.00383195	0.00112444
Sec11c	1436	0.661466	1	-0.435667	0.0149688
Adam15	1438	0.268119	0.498323	0.0123781	0.0023131
Tulp3	1438	0.663249	1	-0.00664971	0.00316451
Dlx5	1439	0.666317	1	-0.0488734	0.00631133
2900093K20Rik	1440	0.467474	0.776466	0.000224709	-0.00137577
Fkbp11	1441	0.66781	1	-0.0157206	0.0044827
Thrap3	1442	0.273242	0.506991	0.0234068	0.00669099
Ddx23	1443	0.275087	0.509072	0.0145232	0.00304039
Gm10399	1443	0.673184	1	-0.00292945	0.00286823
Pqlc1	1445	0.27544	0.509072	0.026924	-0.0478289
Szt2	1445	0.615661	0.960918	-0.00280708	0.00120508
Cyba	1449	0.284489	0.52337	0.00602464	-0.00341354
Nfe2l2	1450	0.284598	0.52337	0.0221009	-0.0117689
Parp9	1450	0.681286	1	-0.0166393	0.00692556
Ovol2	1452	0.288052	0.52884	0.0127029	0.00586543
Hspa9	1452	0.682646	1	-0.0425933	0.016585
Zzef1	1453	0.288429	0.528946	0.0136518	-0.0435327
Tmc5	1453	0.683173	1	-0.00989031	0.00223115
Ostc	1454	0.684175	1	-0.371847	0.0132438
Isyna1	1456	0.289557	0.530428	0.00601318	0.000843691
Snai3	1456	0.482822	0.797161	0.00061544	0.00497336
Spc25	1457	0.687893	1	-0.0473798	0.00140693
Nt5dc3	1458	0.313535	0.565902	0.00862333	0.00434459
Tap2	1462	0.295181	0.539536	0.0214514	-0.00191449
Zfp945	1463	0.352821	0.622891	0.00356249	0.00442723
Dcaf17	1464	0.698262	1	-0.0161372	0.00554118
Cdk12	1465	0.299418	0.545775	0.0206609	-0.0271802
Ccnt2	1466	0.301007	0.548369	0.0196442	-0.00841615
Atp1b1	1467	0.301634	0.549209	0.0278914	-0.0317105
Tns3	1467	0.64431	0.993924	-0.00529374	0.00292222
Wdr45	1468	0.302239	0.549523	0.0152978	-0.0766778
Cdk2ap2	1468	0.705696	1	-0.0948314	0.01152
Mbnl2	1469	0.302304	0.549523	0.0248699	-0.0128292
Heca	1470	0.304571	0.553037	0.0115204	-0.0184419
Thap12	1470	0.709841	1	-0.0082886	0.0045773
1700028J19Rik	1471	0.308408	0.559084	0.00401648	-0.00298562
Rps6kb1	1471	0.355084	0.625115	0.00962053	0.00637747
Mvp	1475	0.315619	0.569041	0.016894	-0.0262909
Gas1	1475	0.513253	0.836151	0.000730064	0.00145839
Fbxo2	1476	0.316013	0.569289	0.00422677	-0.0073776
Ccdc68	1479	0.678226	1	-0.00490567	0.00165163
Mical2	1480	0.360978	0.633518	0.00258548	0.00231767
Rdm1	1481	0.317877	0.572179	0.0133349	-0.00185569
[truncated: 1,313 more rows]

## Sheet: 2-Av Primed
	Top	p.value	FDR	logFC.1	logFC.3
Cenpx	1	4.76299e-125	1.5775e-121	0.81992	0.667572
Slc25a5	1	2.24303e-89	1.48578e-86	0.592678	0.830975
Sec61b	2	1.64359e-123	2.72179e-120	0.78663	0.682113
Nme1	2	2.34457e-88	1.2942e-85	0.545878	0.803976
Rbp7	3	2.11175e-98	2.33138e-95	1.0044	0.954457
Pgp	4	8.3093e-95	6.8801e-92	0.620068	0.614152
Hint1	5	1.75984e-82	8.32658e-80	0.637334	0.633022
Lalba	6	3.54819e-82	1.46895e-79	1.27884	0.825284
Stmn1	7	6.83102e-82	2.51381e-79	0.410632	0.320145
Fabp5	7	2.28482e-59	2.44108e-57	0.626438	0.773508
Shf	8	9.37028e-81	3.10344e-78	0.457601	0.355368
Dctpp1	8	1.79779e-76	4.58022e-74	0.438879	0.426147
Mrpl34	9	6.36934e-80	1.91775e-77	0.390239	0.350142
Ndufs6	9	6.03729e-74	1.42825e-71	0.520794	0.559599
Uqcrq	10	2.37906e-79	6.5662e-77	0.55555	0.543278
Ndufab1	11	7.5534e-63	1.00067e-60	0.470742	0.511813
Lsm4	13	1.44946e-71	3.2004e-69	0.489982	0.450789
H2afz	13	4.86531e-54	4.35511e-52	0.518014	0.69744
Prdx2	14	1.73149e-71	3.58419e-69	0.54022	0.391928
Pclaf	14	4.35656e-52	3.69973e-50	0.330058	0.341155
Galk1	15	1.58317e-70	3.08438e-68	0.530947	0.309775
Dbi	15	3.26291e-51	2.63579e-49	0.468075	0.717575
Psmb8	16	1.85885e-70	3.42028e-68	0.625786	0.416402
Sdf2l1	16	2.21953e-50	1.75026e-48	0.246074	0.412725
Eno1	17	2.50637e-69	4.369e-67	0.636113	0.202507
Eif4ebp1	18	6.59747e-69	1.09254e-66	0.581242	0.175115
Cdk4	19	8.77092e-68	1.3833e-65	0.484357	0.421271
Ndufc1	19	4.21062e-61	4.98056e-59	0.466515	0.458575
Anapc11	20	8.06346e-67	1.21392e-64	0.514569	0.408064
Selenoh	20	8.27054e-61	9.44552e-59	0.379919	0.368656
Mrpl58	21	2.32385e-66	3.34635e-64	0.493968	0.424919
Tubb5	21	9.37041e-47	5.64269e-45	0.561386	0.661556
Acot1	22	3.329e-65	4.59402e-63	0.419156	0.340825
Spc24	22	1.02716e-46	6.07489e-45	0.17953	0.189473
Smdt1	23	1.37002e-46	7.88996e-45	0.314835	0.450533
Hspe1	24	1.46059e-46	8.19912e-45	0.35266	0.555739
Nans	25	1.7732e-62	2.25878e-60	0.395692	0.364183
Mrpl12	25	9.65173e-54	8.41225e-52	0.480344	0.510662
Wap	26	1.59421e-61	1.95557e-59	0.789352	0.586746
Ogfrl1	26	2.54065e-44	1.23745e-42	0.499065	0.571119
Manf	27	3.58119e-44	1.71897e-42	0.376118	0.626881
Hsp90b1	28	5.59629e-43	2.53903e-41	0.328777	0.643562
Csn1s1	29	1.87977e-59	2.07527e-57	0.920674	0.754454
Birc5	29	1.18992e-42	5.32571e-41	0.372017	0.37271
Sf3b5	30	2.76754e-58	2.8644e-56	0.402076	0.362067
Uqcc2	30	1.54119e-41	6.54412e-40	0.339792	0.45113
Tk1	31	9.98347e-50	7.34784e-48	0.248159	0.236058
Ldha	32	1.12167e-57	1.12575e-55	0.546514	0.379524
Pglyrp1	33	4.14271e-57	4.03548e-55	0.391977	0.269148
Chchd10	34	7.04187e-56	6.66362e-54	0.449397	0.375432
Psme2	35	1.00494e-55	9.24549e-54	0.486269	0.420126
Pdia6	36	1.59187e-37	5.54975e-36	0.182835	0.551006
Mrpl57	37	6.97415e-52	5.77459e-50	0.378529	0.3563
Sec11c	37	2.68863e-50	2.02381e-48	0.435667	0.456542
Pop5	38	3.97719e-37	1.37213e-35	0.256413	0.334517
Lao1	39	2.60016e-50	2.00273e-48	0.537046	0.234465
Tmem147	40	9.17631e-37	3.13319e-35	0.317419	0.374371
Calr	41	1.43125e-36	4.83705e-35	0.0684798	0.569617
Chchd1	42	4.6357e-49	3.33771e-47	0.389395	0.345575
Pdap1	43	5.20644e-49	3.66888e-47	0.418844	0.351013
Cenpw	43	5.6856e-41	2.35384e-39	0.202446	0.206221
Fam213a	44	1.1848e-48	8.17515e-47	0.346903	0.0876906
Ppp1r14b	44	8.64962e-36	2.80858e-34	0.336053	0.439084
Slc25a10	45	4.99299e-48	3.37486e-46	0.32017	0.305483
Hmgn2	45	4.21714e-44	1.96721e-42	0.326605	0.310374
Psmb9	46	8.97995e-48	5.94832e-46	0.348892	0.26928
Snrpg	46	1.35742e-40	5.41659e-39	0.38526	0.411234
Tmem258	48	3.38048e-47	2.19532e-45	0.408001	0.381981
Limd2	49	6.52341e-47	4.15491e-45	0.352974	0.210472
Pik3r1	49	3.72808e-34	1.0831e-32	0.271107	0.308029
Chn2	50	6.98216e-47	4.36319e-45	0.348268	0.250537
Mrpl42	50	5.80611e-34	1.64358e-32	0.257373	0.336074
Gale	51	7.16696e-47	4.39574e-45	0.218031	0.164452
Mrps24	51	5.9286e-45	2.93067e-43	0.366441	0.363513
Nt5c	52	1.3817e-46	7.88996e-45	0.433039	0.344905
Cenpm	52	1.39617e-34	4.2807e-33	0.12345	0.123927
P4hb	53	3.19188e-46	1.76192e-44	0.467517	0.297845
Hmgb1	53	1.51965e-33	4.15957e-32	0.358012	0.434778
Timm10b	54	3.72897e-46	2.02465e-44	0.391972	0.359987
Ostc	54	4.1252e-44	1.95181e-42	0.371847	0.374823
Tpi1	55	5.04373e-46	2.69433e-44	0.490011	0.0549392
Id2	55	3.50594e-33	9.36425e-32	0.23681	0.295223
Ndufv2	56	5.69977e-46	2.99645e-44	0.363784	0.356004
Rwdd1	57	1.174e-45	6.07543e-44	0.383254	0.320233
Mif	58	2.93788e-45	1.49697e-43	0.509933	0.115474
Cmc2	58	6.18088e-33	1.61189e-31	0.185608	0.216518
Dus1l	59	4.48007e-45	2.24818e-43	0.31743	0.281032
Taldo1	59	7.21759e-33	1.86755e-31	0.332594	0.448677
Pmf1	60	1.40724e-33	3.88398e-32	0.176157	0.185508
Dtymk	61	8.8546e-41	3.57639e-39	0.269824	0.266504
Slc25a4	62	6.00071e-41	2.45362e-39	0.389351	0.396085
Pmvk	63	1.278e-43	5.87882e-42	0.255799	0.171295
Arpc1b	66	1.1864e-31	2.91063e-30	0.211181	0.50918
1110008P14Rik	67	1.40171e-31	3.38866e-30	0.375919	0.489202
Polr2f	68	1.58518e-42	7.00018e-41	0.363152	0.333565
Pdia3	68	1.43547e-31	3.44513e-30	0.0653404	0.470884
Proser2	69	5.60971e-42	2.44465e-40	0.297123	0.157831
Rpn2	69	3.10147e-31	7.3372e-30	0.20392	0.358685
Zfp36l1	70	1.10649e-41	4.75936e-40	0.471296	0.330132
Tmem238	70	1.25377e-31	3.0533e-30	0.325797	0.373762
Mcrip1	71	5.62601e-41	2.35384e-39	0.394814	0.233937
Ndufa1	71	7.19199e-31	1.65416e-29	0.250229	0.369371
Nop10	73	1.04355e-31	2.57928e-30	0.32878	0.381652
Nfib	75	2.39779e-30	5.40236e-29	0.271205	0.406703
Aqp5	76	2.98762e-40	1.17798e-38	0.545236	0.487281
Psat1	77	3.23059e-40	1.25879e-38	0.266835	0.250469
Dynlt1f	77	1.29163e-39	4.80659e-38	0.203908	0.187118
Hist1h1c	78	3.84016e-40	1.47891e-38	0.428262	0.187148
Hnrnpa1	79	6.18055e-40	2.35287e-38	0.421547	0.38637
Mdh1	79	9.79425e-30	2.09281e-28	0.304212	0.414364
Coa3	80	1.14806e-39	4.32088e-38	0.298862	0.287414
Lage3	80	4.49676e-35	1.39189e-33	0.281786	0.289831
Cdca3	81	4.69607e-29	9.54196e-28	0.108628	0.111428
Fkbp4	82	9.51251e-29	1.89792e-27	0.241452	0.331544
Chmp6	83	1.61322e-39	5.93665e-38	0.340026	0.286035
Cldn3	84	9.07545e-39	3.30306e-37	0.541554	-0.333813
Anp32b	84	3.46469e-31	8.13834e-30	0.378727	0.417248
Vdac1	85	1.15225e-38	4.1481e-37	0.350146	0.173064
Dpy30	86	8.58093e-38	3.05592e-36	0.306024	0.223791
Ss18l2	87	1.41543e-37	4.98713e-36	0.261455	0.225088
Hddc2	88	4.40648e-28	8.58485e-27	0.255403	0.32873
Csn2	89	1.45433e-36	4.8654e-35	0.695901	0.663023
Gata3	89	4.78271e-28	9.26336e-27	0.174325	0.31202
Tkt	90	3.43589e-36	1.13797e-34	0.369125	0.33836
Rnaseh2c	90	1.19726e-27	2.29209e-26	0.210217	0.27751
Sat1	91	5.95612e-36	1.95314e-34	0.542194	0.0120035
Tyms	91	1.21396e-35	3.90353e-34	0.180818	0.171541
Thrsp	93	1.58839e-35	5.05842e-34	0.199985	0.170162
Mrpl18	93	2.42589e-28	4.75417e-27	0.21725	0.238596
Elf5	94	1.78157e-35	5.61959e-34	0.296764	0.276294
Ndufa5	94	4.53475e-27	8.4377e-26	0.260716	0.330166
Txnip	95	2.03758e-35	6.36647e-34	0.224517	0.0510327
Mrps28	96	7.55315e-27	1.38978e-25	0.177733	0.271107
Mrpl17	98	1.4088e-34	4.2807e-33	0.329711	0.291527
Fdps	98	9.37397e-32	2.33433e-30	0.230123	0.232716
Dnajc19	99	1.49621e-34	4.50494e-33	0.283757	0.221879
Cks1b	99	5.53222e-26	1.00124e-24	0.199963	0.29067
Gpx1	100	1.55983e-34	4.6542e-33	0.395373	0.335641
Mcm5	100	9.89396e-26	1.76176e-24	0.0760786	0.0876406
Pycr2	101	2.37815e-34	7.03252e-33	0.18411	0.129003
Crabp2	101	1.06018e-25	1.87771e-24	0.344351	0.420017
Sumo3	102	3.01677e-34	8.84207e-33	0.298502	0.244752
Ccdc34	102	4.81055e-30	1.06217e-28	0.221602	0.224607
Calm3	103	4.58952e-34	1.32178e-32	0.304086	0.217979
Cisd1	103	2.02869e-29	4.25256e-28	0.205885	0.211471
Gapdh	104	5.62617e-34	1.60637e-32	0.390665	0.1454
Naa38	104	1.74166e-25	3.05204e-24	0.220051	0.283151
Mt1	105	6.49638e-34	1.82339e-32	0.62038	0.343194
Cyc1	106	9.50545e-34	2.64555e-32	0.330604	0.301613
Naa10	106	4.60953e-29	9.42392e-28	0.236693	0.252985
Mki67	107	3.88879e-25	6.60496e-24	0.105542	0.113653
Cmas	108	1.96531e-33	5.33533e-32	0.346659	0.318559
Lockd	108	2.34679e-25	4.0482e-24	0.114849	0.120785
Nol7	109	2.77127e-33	7.46216e-32	0.319524	0.198935
Trib3	110	4.15518e-33	1.10096e-31	0.264103	0.143383
Arl4a	110	8.31275e-25	1.38351e-23	0.120613	0.299138
Ndufv3	111	5.65703e-33	1.48699e-31	0.346383	0.202042
Hnrnpa3	112	8.47357e-25	1.40322e-23	0.240555	0.312394
Col9a1	113	1.45006e-32	3.72294e-31	0.308349	0.208934
Lig1	113	1.80518e-24	2.93075e-23	0.133798	0.141391
Fam162a	114	1.50742e-32	3.84043e-31	0.38517	-0.0183811
Fkbp2	114	3.45189e-24	5.47017e-23	0.165051	0.325706
Tubg1	115	3.55353e-24	5.60442e-23	0.0914305	0.101241
Bex3	116	1.72257e-32	4.35507e-31	0.32749	0.207701
Siva1	117	4.22153e-32	1.05922e-30	0.282991	0.243233
Rnf187	117	4.89109e-27	9.04989e-26	0.231339	0.244707
Mbd3	118	6.93932e-24	1.06898e-22	0.230619	0.275899
Lamtor4	119	1.05024e-30	2.38246e-29	0.31259	0.327737
Ssna1	121	2.55163e-31	6.07986e-30	0.294711	0.259169
Fam3c	121	1.35155e-23	2.05337e-22	0.1239	0.373193
Nudcd2	122	1.37071e-23	2.06354e-22	0.205115	0.230417
Pafah1b3	123	4.11774e-31	9.60419e-30	0.296924	0.0557479
Acaa2	123	1.12368e-25	1.97959e-24	0.237252	0.256657
Klk10	124	6.17125e-31	1.42931e-29	0.8883	0.765449
Pkig	125	1.84292e-23	2.7371e-22	0.142402	0.286127
Pgam1	126	8.24322e-31	1.88287e-29	0.371282	0.11519
Hist1h2ap	127	2.1903e-23	3.23851e-22	0.128677	0.134242
Ltf	128	2.22274e-23	3.27188e-22	-0.37399	0.990632
Ppdpf	129	2.45041e-30	5.48363e-29	0.298533	0.24458
Mrpl36	130	3.08725e-30	6.8624e-29	0.255852	0.244485
Ddt	131	3.06744e-23	4.47548e-22	0.24087	0.301918
G0s2	132	4.13136e-24	6.45428e-23	0.21776	0.220738
Clca2	133	5.74863e-30	1.26089e-28	0.139217	0.122853
Ndufs8	133	1.04662e-22	1.49414e-21	0.222336	0.292019
Epb41l4a	134	6.34659e-30	1.38289e-28	0.303033	0.260602
Ube2c	134	1.36503e-29	2.89805e-28	0.198602	0.18922
Lsm5	136	8.7306e-30	1.88992e-28	0.202845	0.185563
Tmem14c	136	3.63862e-22	5.04231e-21	0.242569	0.286818
Lmo4	137	9.67718e-30	2.08122e-28	0.315889	0.300854
Knstrn	139	1.55671e-29	3.28397e-28	0.107594	0.101519
Hmgb3	141	2.55287e-29	5.31768e-28	0.258446	0.19731
Irx1	141	3.18538e-21	4.25402e-20	0.292907	0.331457
Tagln2	142	2.61516e-29	5.41339e-28	0.469664	0.00122983
Creld2	142	4.26084e-21	5.64476e-20	0.168296	0.244246
Anln	143	4.49312e-29	9.243e-28	0.121894	0.0804205
Lsm7	143	3.97223e-25	6.71225e-24	0.235109	0.243665
Cdk1	145	3.15559e-22	4.40983e-21	0.100379	0.10173
Dmkn	146	5.23751e-29	1.05772e-27	0.319721	0.0387367
Msrb1	147	7.25663e-29	1.4566e-27	0.313881	0.149474
Hist1h2bc	148	1.06886e-28	2.11979e-27	0.500943	0.151401
Idh2	148	2.01958e-20	2.60266e-19	0.166141	0.208254
Ten1	149	1.59289e-28	3.14027e-27	0.291947	0.240329
Rfc4	153	8.35933e-28	1.60966e-26	0.111927	0.0812462
Pbk	153	3.6814e-21	4.89671e-20	0.074019	0.074264
Tbcb	154	1.21561e-27	2.31386e-26	0.260263	0.185747
Fkbp3	155	2.88902e-27	5.46767e-26	0.26075	0.256365
Nhp2	155	5.33502e-20	6.76995e-19	0.243428	0.300696
H1f0	156	3.41087e-27	6.41865e-26	0.33033	0.12473
Dut	156	7.21078e-22	9.82802e-21	0.146744	0.145979
Prc1	157	3.48878e-27	6.52816e-26	0.132903	0.0867101
Ndufaf8	157	4.75588e-25	7.99567e-24	0.295365	0.296258
Rpn1	158	1.20038e-19	1.50025e-18	0.144115	0.251417
Ccnb2	160	9.1935e-24	1.40317e-22	0.084127	0.0786824
Palmd	161	1.99652e-26	3.65329e-25	0.140846	0.111952
Psma4	161	2.46333e-19	3.05563e-18	0.235013	0.274476
Syngr2	163	5.37479e-26	9.78094e-25	0.318111	0.187222
Hist1h1e	163	5.29372e-19	6.35246e-18	0.0872919	0.102987
Lsm6	164	5.21332e-20	6.66661e-19	0.192386	0.222405
2010111I01Rik	165	6.11596e-26	1.10087e-24	0.335038	0.235465
Hspd1	165	5.66909e-19	6.77834e-18	0.0375934	0.30205
Ldhb	166	7.81999e-26	1.39999e-24	0.283456	0.226053
Tmem54	169	1.97903e-25	3.44977e-24	0.110353	0.0731064
Acat1	169	3.30126e-22	4.59402e-21	0.237945	0.242779
Wfdc18	170	2.22649e-25	3.8608e-24	0.636491	0.524245
Abhd5	171	3.13334e-25	5.377e-24	0.309318	0.236375
Mcm6	171	1.33592e-21	1.80595e-20	0.0752516	0.0747394
Anp32a	172	3.22074e-25	5.4985e-24	0.245937	0.225277
Nme2	172	1.81867e-21	2.43864e-20	0.184429	0.194449
Nucks1	173	2.5404e-18	2.99424e-17	0.225507	0.255232
Slc35b1	174	2.66968e-18	3.12438e-17	0.141568	0.195708
Clca3a2	175	2.69927e-18	3.13684e-17	0.305332	0.396796
Klf3	176	5.2717e-25	8.81811e-24	0.268453	0.100635
Gars	177	1.16175e-24	1.91428e-23	0.236885	0.129572
Smc2	177	2.31933e-24	3.72894e-23	0.12207	0.11394
Ucp2	178	1.33845e-24	2.19453e-23	0.343261	0.309055
Mrpl30	179	1.73173e-24	2.82537e-23	0.268835	0.181524
Ddost	179	4.34163e-18	4.94141e-17	0.0907958	0.26068
Nucb2	180	2.09579e-24	3.38597e-23	0.269712	0.147931
Hnrnpm	180	4.84477e-18	5.49516e-17	0.143266	0.218217
Hnrnpa2b1	181	5.20026e-18	5.87825e-17	0.162993	0.301709
Lzts2	182	2.56007e-24	4.09612e-23	0.206813	0.0857318
Spcs2	182	5.5965e-18	6.30052e-17	0.211653	0.288581
Top2a	183	5.41347e-21	7.11485e-20	0.105284	0.102796
Mtch1	184	2.96891e-24	4.72742e-23	0.246383	0.237861
Pgk1	185	3.77333e-24	5.92288e-23	0.406836	-0.209828
Mrpl51	185	9.04041e-18	1.00814e-16	0.154578	0.245096
Trps1	186	1.17585e-17	1.30248e-16	0.202692	0.237604
Phactr1	187	4.63392e-24	7.20542e-23	0.238785	0.134109
Impdh2	187	1.4808e-17	1.61862e-16	0.213171	0.269082
Asns	188	5.12898e-24	7.93794e-23	0.201378	0.0939971
Csn3	188	1.58813e-17	1.73022e-16	0.00946741	0.611692
Banf1	190	7.58884e-24	1.16362e-22	0.258738	0.246198
Mrps26	190	1.97969e-22	2.80203e-21	0.214012	0.214689
Tipin	191	2.16558e-17	2.34392e-16	0.084104	0.09431
Cdca8	192	1.37066e-23	2.06354e-22	0.108433	0.0921447
Hmgn5	192	9.1897e-21	1.20302e-19	0.192074	0.201728
Cib1	193	1.69754e-23	2.544e-22	0.231021	0.211682
Racgap1	193	2.87964e-18	3.32312e-17	0.0552913	0.0555544
Sox4	194	1.75092e-23	2.61219e-22	0.419052	0.344859
Slc38a10	195	2.33465e-23	3.42141e-22	0.220514	0.142205
Erh	195	3.00543e-17	3.23181e-16	0.20051	0.24213
Dnajc9	196	2.68046e-18	3.12595e-17	0.107424	0.110649
Slc20a1	197	4.43272e-23	6.43911e-22	0.317443	0.0819642
Col11a1	198	4.52555e-23	6.54526e-22	0.173233	0.133726
Pam16	198	4.2245e-17	4.47014e-16	0.177257	0.221819
Duoxa1	199	5.36727e-23	7.72887e-22	0.0940114	0.0781519
Irx2	199	6.91547e-17	7.20252e-16	0.178641	0.25662
Ckap2l	200	8.03453e-17	8.31574e-16	0.0557428	0.0566119
Ddit4	201	1.01268e-22	1.45194e-21	0.27825	0.220479
Phgdh	201	1.00093e-16	1.03274e-15	0.0885429	0.0977493
Sh3bgrl3	202	1.13562e-22	1.61424e-21	0.279841	0.0823909
Ndufa10	202	2.50381e-19	3.09426e-18	0.225956	0.250598
Spc25	204	6.4567e-17	6.76728e-16	0.0473798	0.0497298
Desi2	205	2.13893e-22	3.01452e-21	0.254897	0.130646
Dnajc3	205	1.32127e-16	1.35482e-15	-0.0104461	0.236256
Prim1	207	2.6799e-22	3.76094e-21	0.084293	0.0792529
Bzw2	208	2.04752e-16	2.08658e-15	0.20133	0.250258
Ccna2	209	6.9126e-17	7.20252e-16	0.0517607	0.0525826
Rfc2	210	5.38568e-20	6.80815e-19	0.134854	0.137465
Ubl4a	211	4.54052e-22	6.26592e-21	0.247184	0.179675
Parp6	212	4.7194e-22	6.48575e-21	0.169158	0.0825903
Tcf19	212	1.18103e-16	1.21477e-15	0.0596199	0.061156
Pradc1	213	5.80525e-22	7.94503e-21	0.191538	0.177998
Alyref	214	6.49515e-16	6.4407e-15	0.192014	0.247317
Cox17	216	1.27932e-17	1.41237e-16	0.217705	0.240424
Anxa6	218	8.8418e-22	1.20017e-20	0.26516	0.125574
Josd2	220	1.67746e-21	2.25844e-20	0.185732	0.0837757
Gins2	220	4.22689e-18	4.8274e-17	0.111235	0.106319
Hmmr	221	1.02866e-15	1.00499e-14	0.0429014	0.0443265
Ddhd2	223	2.43257e-15	2.34206e-14	0.0754858	0.087491
Dnajb11	224	3.43922e-15	3.27318e-14	0.0668729	0.202476
Tspan1	225	5.37e-21	7.08583e-20	0.08407	0.0682827
Rpa3	225	3.92859e-15	3.71757e-14	0.0966319	0.109337
Ranbp1	228	4.55295e-15	4.27177e-14	0.238605	0.283269
Grhpr	229	9.90614e-21	1.2917e-19	0.199476	0.152937
Hells	229	4.15377e-15	3.91945e-14	0.0573925	0.0606193
Cdc20	230	1.47145e-20	1.91116e-19	0.0758583	0.0613938
Lurap1l	230	6.23562e-15	5.78498e-14	-0.0930557	0.269505
Pfkl	231	1.66024e-20	2.14793e-19	0.251978	0.161432
Serp1	231	6.91807e-15	6.40019e-14	0.214756	0.251621
Mrpl38	232	8.38992e-16	8.29475e-15	0.225983	0.236343
Rrm2	233	3.36061e-17	3.60205e-16	0.058136	0.0565082
Bricd5	235	4.55925e-20	5.85281e-19	0.233494	0.179969
Mad2l1	235	1.36154e-14	1.24915e-13	0.0537393	0.0556967
Chac1	237	5.24137e-20	6.6767e-19	0.245443	0.100347
Cycs	237	3.65906e-15	3.47244e-14	0.240635	0.291321
Crispld2	238	5.82948e-15	5.43866e-14	0.0758513	0.0772525
Fasn	239	1.07473e-19	1.35342e-18	0.204767	0.177792
Abracl	240	1.18514e-19	1.48681e-18	0.249246	0.16254
Ndufaf2	240	2.65347e-14	2.40775e-13	0.0844667	0.148508
Mgst3	242	2.0781e-19	2.58747e-18	0.215921	0.196504
Haus1	242	5.98013e-15	5.56354e-14	0.0892931	0.0917658
Cenpa	243	4.03396e-17	4.29597e-16	0.0911213	0.0846632
Uhrf1	244	2.61497e-14	2.37933e-13	0.0467431	0.0459619
Parp1	245	2.95653e-19	3.64015e-18	0.0980013	0.0864084
Slc9a3r2	245	8.99282e-14	8.00651e-13	0.0970469	0.163361
Mcm3	246	3.48267e-19	4.27208e-18	0.0577466	0.0533916
Sorbs2	247	3.83895e-19	4.69174e-18	0.183711	0.122512
Srrt	247	1.21662e-13	1.07166e-12	0.0839882	0.123228
Tspan13	248	3.90044e-19	4.74936e-18	0.174121	0.0785597
Cbx5	248	1.28571e-13	1.12653e-12	0.085102	0.0963821
Lxn	249	4.06052e-19	4.92617e-18	0.226315	0.186942
Mlec	249	1.30717e-13	1.14231e-12	0.141835	0.184743
Nap1l1	250	4.24418e-19	5.13019e-18	0.242989	0.223013
Prdx6	252	4.43811e-19	5.3451e-18	0.239712	0.196997
Npm3	252	1.31505e-14	1.20985e-13	0.214964	0.24534
Dnmt1	253	2.48547e-16	2.50972e-15	0.109915	0.107498
Cenpf	254	7.24405e-19	8.63032e-18	0.077226	0.0605397
Tpx2	254	2.13158e-13	1.85296e-12	0.0544812	0.0582258
Cldn4	255	8.04822e-19	9.55402e-18	0.557219	-0.659661
Prmt1	255	5.28725e-13	4.52491e-12	0.0885115	0.213884
Col16a1	256	5.51574e-13	4.69411e-12	0.0678366	0.130098
Tacc3	257	2.39435e-18	2.83217e-17	0.0607215	0.0517766
Pa2g4	257	3.43988e-14	3.10433e-13	0.2014	0.217991
Gpi1	258	2.66957e-18	3.12438e-17	0.26205	-0.093767
C1qbp	258	1.55115e-15	1.511e-14	0.221481	0.233222
Tceal9	259	8.8795e-18	9.93544e-17	0.290189	0.306204
Akr1b3	260	2.83579e-18	3.28396e-17	0.123898	0.116915
Nusap1	260	3.40925e-14	3.08509e-13	0.0484976	0.0483594
Dap	261	5.23639e-13	4.49299e-12	0.196148	0.230491
Rtraf	262	3.24733e-18	3.73443e-17	0.237255	0.103117
Pdia4	262	1.03344e-12	8.66521e-12	0.0391269	0.169993
Lap3	263	4.15846e-18	4.76568e-17	0.21586	0.176591
Dhfr	265	5.61187e-18	6.30052e-17	0.0828728	0.0729612
Tmem97	265	9.58466e-14	8.48781e-13	0.0856845	0.0932149
Cenpe	266	2.8338e-16	2.84411e-15	0.0495142	0.0477813
Tuba1b	268	3.27004e-12	2.70084e-11	0.101243	0.273715
Cdkn2c	269	9.74664e-18	1.08325e-16	0.116664	0.0957899
Ctnnbip1	269	5.36797e-15	5.02223e-14	0.211623	0.201206
Crip2	272	1.3379e-17	1.47214e-16	0.280687	0.163704
Ikzf2	273	5.4745e-12	4.41157e-11	0.0489949	0.0588048
Nrm	274	1.48043e-17	1.61862e-16	0.0663012	0.0584794
Hmg20b	274	7.43883e-12	5.92245e-11	0.131847	0.166075
Hmgb2	275	1.89444e-17	2.05718e-16	0.227031	0.0808918
Etnk1	275	8.58202e-14	7.66136e-13	0.144555	0.149793
Bcl2l14	277	2.23026e-17	2.40607e-16	0.139831	0.0304964
Cenph	278	4.84377e-12	3.95137e-11	0.0463495	0.0476346
Cracr2b	279	3.96006e-17	4.23087e-16	0.186685	0.124571
Marcks	279	1.23254e-11	9.69637e-11	0.164057	0.164655
Kcnn4	281	4.11242e-17	4.36549e-16	0.304852	0.183556
Anapc13	281	3.55405e-12	2.92811e-11	0.179225	0.20691
Acsl4	282	4.65642e-17	4.91148e-16	0.166998	0.130929
Hk1	283	5.42225e-17	5.70111e-16	0.149839	0.0786511
Il17b	283	1.64326e-11	1.2836e-10	0.0538853	0.0623742
Blnk	285	7.49098e-17	7.77747e-16	0.110284	0.0627957
Pla2g16	285	5.53573e-12	4.45008e-11	0.178249	0.206807
Ccnb1	286	6.27092e-12	5.02889e-11	0.0357495	0.0371562
Pdcd5	289	1.49684e-16	1.53011e-15	0.22877	0.0504166
Zfp750	289	2.24502e-16	2.28083e-15	0.0776173	0.0647844
Psmb10	290	2.62739e-11	2.03792e-10	0.0793658	0.190972
Syne4	292	2.44456e-16	2.47596e-15	0.134972	0.124068
Plekhb1	293	3.29862e-11	2.53481e-10	-0.0359294	0.193753
Rbp1	294	5.02733e-11	3.81893e-10	-0.383958	0.416849
Oxct1	295	2.57083e-16	2.58802e-15	0.205665	0.100981
Ik	297	6.50376e-11	4.92917e-10	0.117225	0.156979
Lman1	298	3.86269e-16	3.86502e-15	0.189545	0.159374
Psph	298	6.54521e-11	4.94926e-10	0.0861345	0.103094
Aurkb	300	7.62808e-11	5.72885e-10	0.0297612	0.0309501
Dcpp1	301	2.80805e-13	2.42827e-12	0.223912	0.210107
Smc4	302	2.90156e-11	2.24532e-10	0.137184	0.139651
Lgals7	303	5.27966e-16	5.26694e-15	0.237576	0.130296
Rfc1	304	6.34567e-16	6.31137e-15	0.109334	0.0790712
Pdxk	305	7.29311e-12	5.83449e-11	0.133898	0.137224
Sbsn	306	8.42741e-16	8.30702e-15	0.125345	-0.0108431
Aldh1a3	307	8.46564e-16	8.31994e-15	0.356154	0.116739
Srm	307	2.03495e-10	1.50778e-09	0.0443615	0.15554
Mid1ip1	308	8.86537e-16	8.68701e-15	0.104147	0.0458035
Cbx3	310	1.58123e-15	1.53578e-14	0.133213	0.11635
Snhg20	311	1.70107e-15	1.64735e-14	0.212333	0.130912
Ssrp1	311	3.54082e-14	3.17938e-13	0.149415	0.152174
Cks2	313	2.20272e-15	2.12694e-14	0.18898	0.100152
Gmnn	313	4.24554e-10	3.10402e-09	0.0619607	0.0732262
Narf	314	2.47976e-15	2.38057e-14	0.0806785	0.0701877
Vps36	314	2.18736e-10	1.61709e-09	0.148378	0.161842
Atf3	315	3.04576e-15	2.91548e-14	0.271433	-0.0261409
Lmo1	315	4.78843e-10	3.49323e-09	0.0393631	0.101676
Trappc6a	316	3.05957e-15	2.92026e-14	0.218478	-0.00485
Prdx4	317	5.35909e-10	3.89239e-09	0.143218	0.217101
Secisbp2l	319	4.26254e-15	4.01066e-14	0.149921	-0.00125473
Cpd	319	5.53838e-10	4.01381e-09	0.0691939	0.0845054
E2f1	320	6.24629e-10	4.48758e-09	0.0214987	0.0362947
Tmem109	321	1.04191e-09	7.38933e-09	0.0742609	0.0829699
Mfge8	322	1.21922e-09	8.60996e-09	-0.901473	0.33358
Rrm1	325	3.25384e-11	2.50622e-10	0.0651715	0.0648698
Cdc42se1	326	1.03273e-14	9.52759e-14	0.230028	-0.0110434
Igfals	327	2.29571e-09	1.60749e-08	0.0360632	0.0661165
Trib2	328	2.35469e-09	1.6453e-08	0.0889775	0.135362
Rfc3	329	1.54629e-14	1.41473e-13	0.0772355	0.0655228
Nup85	329	2.42183e-09	1.68511e-08	0.0934571	0.0980564
Tuba1a	330	1.92128e-14	1.75297e-13	0.314733	0.107594
Emb	331	3.03638e-09	2.08641e-08	0.0465111	0.0611351
Mis18a	333	2.15433e-12	1.78826e-11	0.0684465	0.0634416
Snrpd3	334	1.98077e-09	1.38989e-08	0.152447	0.181789
Cdkn3	335	1.06393e-13	9.39659e-13	0.049854	0.0454891
Mfsd4a	336	3.54225e-14	3.17938e-13	0.091458	-0.00373672
Dab2	337	6.53093e-09	4.40539e-08	0.0464057	0.119378
Cdk2ap1	339	6.15348e-13	5.19906e-12	0.171933	0.166758
Hacd1	340	7.38456e-14	6.61018e-13	0.134239	0.0520385
Rexo2	340	4.29616e-13	3.70544e-12	0.192226	0.187425
Pcyt2	342	9.31584e-14	8.27187e-13	0.125484	0.0909571
Nr2c2ap	342	1.23631e-13	1.08612e-12	0.138271	0.128103
Slc29a1	346	1.78142e-12	1.48616e-11	0.179246	0.169829
Mthfd2	349	1.5706e-13	1.3689e-12	0.179223	0.140587
Magt1	349	1.00725e-12	8.467e-12	0.126698	0.11803
Aprt	350	1.2136e-08	8.0874e-08	0.148799	0.159703
Hebp1	351	2.25511e-13	1.95522e-12	0.120274	0.0538339
Tmed3	352	4.95843e-12	4.02732e-11	0.198407	0.199976
Pbx1	353	2.16757e-08	1.43293e-07	0.0516839	0.17209
Commd3	354	1.75832e-09	1.23906e-08	0.13807	0.153677
Fblim1	355	5.02831e-13	4.32565e-12	0.153028	-0.108862
Pxmp4	356	5.40151e-13	4.61077e-12	0.12515	0.0901019
Acly	356	1.82709e-11	1.4205e-10	0.0995701	0.0934401
Gm11361	357	5.52749e-13	4.69411e-12	0.204523	0.0551961
Csn1s2a	357	2.6664e-08	1.7522e-07	0.186031	0.208814
Prpsap1	358	5.57604e-13	4.72324e-12	0.189603	0.155022
Jade1	360	7.94269e-13	6.69368e-12	0.0837522	0.0544893
Fbl	360	3.6792e-08	2.41297e-07	0.0414086	0.149334
Serinc2	362	4.22926e-08	2.75193e-07	0.130953	0.154782
Srsf3	363	4.46936e-08	2.90245e-07	-0.0390724	0.184078
Smc1a	364	5.04354e-08	3.26254e-07	0.10028	0.128331
Ccl9	366	1.51127e-12	1.26398e-11	0.0893668	0.0469402
Peg3	366	5.6657e-08	3.65074e-07	0.0477854	0.054138
Ssu72	368	2.1369e-12	1.77824e-11	0.18685	0.0577559
Usp1	368	9.04683e-08	5.77324e-07	0.055999	0.0704923
Stat1	369	1.10265e-07	6.98277e-07	0.0619319	0.103471
Lsm3	370	2.90917e-12	2.40879e-11	0.124954	0.0696058
Cox20	370	1.15055e-07	7.27216e-07	0.0628738	0.122156
Ralbp1	372	3.65208e-12	3.00141e-11	0.194584	-0.0365196
1110004E09Rik	372	1.23375e-07	7.76839e-07	0.048714	0.0812513
Sntb2	373	3.96829e-12	3.25321e-11	0.126256	0.0714686
Casp1	373	1.24806e-08	8.30034e-08	0.0969086	0.101313
H2afx	374	3.5674e-10	2.61979e-09	0.0945107	0.0877659
Ezh2	375	4.50737e-12	3.68603e-11	0.095685	0.0754296
Dhrs7	376	1.57656e-07	9.79298e-07	0.086604	0.110977
Cbx4	377	4.96119e-12	4.02732e-11	0.0797877	-0.0331855
Zfp428	377	1.57894e-07	9.79298e-07	0.0543645	0.0851134
Tead2	378	5.31615e-12	4.30491e-11	0.126647	0.044315
Gpatch4	378	1.71951e-07	1.06053e-06	0.0555221	0.0857751
Sh3kbp1	379	5.46431e-12	4.41157e-11	0.120469	0.00459829
Dek	379	1.8591e-07	1.14449e-06	0.10809	0.140242
Polr2l	380	1.06022e-07	6.73981e-07	0.111161	0.124334
Mcm7	381	2.31789e-07	1.42428e-06	0.0514545	0.065189
Cited4	382	2.38509e-07	1.46285e-06	0.0405547	0.0515856
Cetn3	383	7.35182e-12	5.86729e-11	0.172023	0.141697
Bin1	383	2.53e-07	1.54886e-06	0.135255	0.155931
Hist1h2ae	384	7.77293e-12	6.17361e-11	0.0528636	0.0462578
Ubald2	385	8.07758e-12	6.40023e-11	0.248148	-0.290623
Herpud1	386	8.9958e-12	7.11076e-11	0.182785	0.112271
Sox10	387	9.14981e-12	7.21528e-11	0.13033	0.0999719
Ass1	387	3.01465e-07	1.84216e-06	0.129214	0.1666
Hsdl2	388	1.70908e-07	1.05606e-06	0.0954662	0.106058
Ddx39b	389	3.76079e-07	2.28545e-06	0.111136	0.12524
Arg1	390	1.36811e-11	1.07374e-10	0.134679	0.016724
Mgp	390	4.00931e-07	2.43202e-06	-0.157099	0.140744
Arpc1a	391	1.46129e-11	1.14416e-10	0.183851	0.16249
Mtss1	392	1.81494e-11	1.41437e-10	0.114127	0.0931349
Mgst1	392	4.53177e-07	2.73891e-06	-0.38315	0.237494
Nfix	393	4.96131e-07	2.9714e-06	0.0721548	0.152298
Eya2	395	6.15487e-07	3.67296e-06	0.0367185	0.0544383
Folr1	396	3.07207e-11	2.37172e-10	0.256537	0.206475
Smc6	397	2.40421e-09	1.67636e-08	0.134384	0.132662
Mb	399	3.55448e-11	2.7251e-10	0.0556801	0.0021869
Bambi	399	9.60164e-07	5.65848e-06	0.0340397	0.0490729
Arrdc4	400	4.01942e-11	3.07444e-10	0.164712	0.0344571
Ppa1	400	9.70819e-07	5.7111e-06	0.0436335	0.149322
Papss1	401	4.14727e-11	3.16492e-10	0.16079	0.0328019
Exosc2	401	1.07193e-06	6.2614e-06	0.0163878	0.0428716
Kxd1	402	4.50683e-11	3.4314e-10	0.116163	0.0340159
Nrtn	402	8.45976e-11	6.33908e-10	0.13697	0.107513
Tbrg1	403	6.82913e-11	5.15218e-10	0.170148	0.0263246
Adrm1	403	1.0908e-06	6.35252e-06	-0.00653506	0.149956
Eif4b	405	7.51036e-11	5.65325e-10	0.169731	-0.0548646
Idi1	406	4.50767e-08	2.9216e-07	0.0513621	0.0522088
Gde1	407	9.17616e-11	6.86037e-10	0.193535	0.0837738
Dynll2	408	1.02291e-10	7.63034e-10	0.161953	0.0881135
Cacybp	408	1.50589e-06	8.68903e-06	-0.0696817	0.134227
Tap1	410	1.49119e-10	1.10985e-09	0.111457	0.0402576
Nfia	412	2.03282e-10	1.50778e-09	0.0946239	0.0705172
Fos	412	1.04669e-06	6.12482e-06	0.199977	0.240644
Mybbp1a	413	2.11604e-06	1.20005e-05	0.0110053	0.0819497
St6galnac6	414	3.08005e-10	2.27197e-09	0.139556	-0.00870931
Fam20a	415	3.11029e-10	2.28917e-09	0.105718	0.0757402
Car6	417	3.7175e-10	2.72398e-09	0.0921537	0.0139199
Ptprf	418	5.2294e-10	3.80654e-09	0.150623	-0.0314605
Set	418	2.58465e-06	1.45337e-05	0.104337	0.157425
Bspry	419	5.72613e-10	4.14082e-09	0.147208	0.0830668
Traf4	419	7.26221e-10	5.18372e-09	0.127069	0.106272
Slc31a2	420	5.85335e-10	4.2236e-09	0.115023	0.0659056
Mrps6	420	3.11793e-06	1.74731e-05	0.00186078	0.130419
Rpa2	421	6.16155e-10	4.43632e-09	0.0514552	0.0463613
Itgb4	422	6.26353e-10	4.49022e-09	0.161014	0.00191419
Epha7	422	3.82657e-06	2.1372e-05	0.0135418	0.0240119
Klk6	423	6.81508e-10	4.87507e-09	0.223403	0.112966
Hoxb4	423	4.08226e-06	2.27617e-05	0.00273374	0.0131351
Prss22	424	4.13707e-06	2.30285e-05	0.076162	0.114871
Elovl5	425	4.46593e-06	2.47344e-05	0.0412503	0.0652302
Arrdc3	426	1.4196e-07	8.88794e-07	0.0500777	0.0459302
Pcbp4	427	2.64998e-09	1.82849e-08	0.109828	0.0916684
Cdc34	428	9.02766e-10	6.43002e-09	0.150273	0.00189732
Rnf213	429	9.38591e-10	6.67085e-09	0.135704	0.0543037
Rad50	429	8.46723e-07	5.00776e-06	0.0594469	0.0615525
Hist1h4i	430	1.15258e-09	8.15675e-09	0.103284	0.024162
Bhlhe41	430	4.88571e-06	2.69242e-05	0.0563747	0.122807
Lars2	431	5.17932e-06	2.84948e-05	0.0540108	0.0676058
Vdr	433	5.43075e-06	2.98286e-05	0.0664963	0.0849582
Tmpo	434	1.84976e-09	1.30072e-08	0.0972775	0.00535614
Gsta4	434	5.70341e-06	3.12226e-05	0.0148806	0.0970017
B930036N10Rik	436	1.5069e-07	9.39898e-07	0.0861525	0.0894601
Hist3h2a	438	2.44198e-09	1.69557e-08	0.0593105	0.0299405
Upf3b	438	1.24088e-07	7.79845e-07	0.0872772	0.0843317
Abhd17a	439	2.47437e-09	1.71446e-08	0.150707	0.104843
Kif21a	440	2.60834e-09	1.80352e-08	0.109735	0.0688084
Fam83a	440	8.19008e-06	4.43953e-05	-0.0197327	0.0907686
C2cd4b	441	2.88763e-09	1.98832e-08	0.0599035	0.0518209
Lmod1	443	1.05174e-05	5.66399e-05	0.00632936	0.0426769
Prim2	444	3.23739e-09	2.21993e-08	0.0537109	0.0387473
Krt19	445	3.27233e-09	2.23925e-08	0.289419	0.116703
Socs2	445	1.13163e-05	6.08435e-05	0.0827711	0.0973667
2610528A11Rik	446	3.41587e-09	2.33265e-08	0.224122	-0.298715
Dusp6	446	1.52788e-07	9.51194e-07	0.139606	0.140463
Insl6	447	4.07157e-09	2.7747e-08	0.0845819	0.0265519
Timm8a1	448	1.23105e-05	6.59747e-05	0.0966045	0.130965
9530077C05Rik	449	1.24869e-05	6.6812e-05	0.0100327	0.0144389
Chchd5	450	4.9213e-09	3.34689e-08	0.121365	-0.0160003
Snhg9	451	1.42611e-05	7.60594e-05	0.0624286	0.0615944
Ano1	452	5.63229e-09	3.82257e-08	0.130299	0.0968257
Cnp	452	1.45083e-05	7.71289e-05	0.0430216	0.0637967
Mex3a	453	5.99049e-09	4.05737e-08	0.0893247	0.0655499
Ccnd1	453	1.46504e-05	7.77597e-05	0.102212	0.1779
Ier2	454	6.18071e-09	4.17766e-08	0.204135	-0.00838984
Dexi	454	1.48195e-05	7.85316e-05	0.00800865	0.0518796
Smim14	455	7.00572e-09	4.71605e-08	0.164456	0.0909876
Ntng1	455	1.51036e-05	7.99091e-05	0.000359718	0.0370334
Krt79	456	7.93437e-09	5.33035e-08	0.0812058	0.0365652
Sesn3	456	1.64721e-05	8.65962e-05	0.0500035	0.0610816
Them4	457	8.02986e-09	5.38358e-08	0.059282	0.0457931
Urah	457	1.69925e-05	8.91903e-05	0.0379955	0.137918
Areg	458	9.35171e-09	6.25714e-08	0.275294	-0.131517
Tcim	458	1.85655e-05	9.68331e-05	0.0770192	0.119042
Cldn1	459	1.00557e-08	6.71464e-08	0.182604	-0.263556
Fen1	460	1.3288e-07	8.33522e-07	0.0429528	0.040854
Plb1	461	2.10183e-05	0.000108769	-0.0607673	0.0577692
Mt2	462	1.45527e-08	9.65905e-08	0.177362	0.130558
Hebp2	464	1.59023e-08	1.05337e-07	0.118001	0.0295795
Snx18	464	2.4212e-05	0.000124712	0.0358644	0.0482794
Srp72	466	2.2159e-08	1.46197e-07	0.127204	0.108192
S100a8	466	2.65807e-05	0.000136489	0.0255748	0.116548
Cish	467	2.30184e-08	1.51564e-07	0.0692002	0.0121739
Il24	467	2.81923e-05	0.000144094	0.0427559	0.0466537
Spink5	470	3.71982e-08	2.43479e-07	0.0824494	0.0263155
Adig	470	8.21346e-08	5.25154e-07	0.0918421	0.0847407
Adamts1	471	3.9901e-08	2.60655e-07	0.173576	0.00898021
Krcc1	473	4.02812e-08	2.62621e-07	0.13265	0.0968558
Fxyd3	473	6.51093e-05	0.000326236	-0.0824156	0.178218
Erbb3	475	5.15938e-08	3.33097e-07	0.10193	-0.145851
Pde7a	475	6.8935e-05	0.000343845	0.0190055	0.0474833
2810004N23Rik	477	6.65728e-08	4.28134e-07	0.0964247	0.0786801
Capg	477	8.00483e-05	0.000397481	-0.074599	0.141656
Celsr2	478	7.27555e-08	4.66989e-07	0.113214	0.0610672
Tprn	478	8.86815e-05	0.000437725	-0.012801	0.0472289
Flna	479	7.75707e-08	4.96933e-07	0.134624	-0.014189
Samd5	479	9.99908e-06	5.40244e-05	0.0405941	0.0347154
Scgb2b27	481	9.12788e-08	5.81376e-07	0.145673	-0.0492232
Surf4	481	0.000115381	0.000566976	0.065293	0.136199
Usp36	482	1.06416e-07	6.75188e-07	0.107038	0.0281278
Krtcap3	482	0.00011686	0.000573394	0.0414186	0.099136
Comt	485	1.22538e-07	7.73042e-07	0.134507	0.0780567
Hspa5	486	0.000132927	0.00064743	-0.167837	0.175677
Vcp	487	0.000141676	0.000686012	-0.0074948	0.129652
AW112010	488	0.000142991	0.000691367	0.00797799	0.0973037
Btc	489	1.46152e-07	9.1331e-07	0.0429037	0.0217114
Acsl3	490	0.000146181	0.00070576	0.00339432	0.0604707
Plscr1	492	0.000163691	0.000788001	-0.0251069	0.0684555
Irs1	493	0.000174944	0.000840951	0.0206456	0.0239537
Nectin4	494	1.67617e-07	1.03766e-06	0.0860716	-0.00633592
Eif2b4	494	9.3746e-05	0.000462034	0.0681445	0.0766769
Cldn2	496	1.77785e-05	9.30212e-05	0.0379703	0.0383673
2310057J18Rik	497	3.65351e-07	2.22844e-06	0.101061	0.0611385
Tigd2	497	1.91404e-05	9.95181e-05	0.0646958	0.0682805
Atp2b1	498	3.67071e-07	2.23482e-06	0.171153	0.0941631
Shtn1	499	4.33681e-07	2.62587e-06	0.0585551	0.0389675
H2afv	499	0.000205133	0.000978962	0.0891028	0.114466
Zfp292	500	4.67216e-07	2.81861e-06	0.0454054	0.0372101
Gm42418	500	0.000210939	0.00100522	0.0399846	0.135538
Chpt1	501	4.70648e-07	2.83416e-06	0.096198	0.0774743
C1qtnf1	501	0.000214744	0.00102042	0.0104223	0.0335609
Smad1	502	4.88572e-07	2.93675e-06	0.0812938	0.0426201
Pycr1	503	4.90645e-07	2.94387e-06	0.0841559	0.00865708
Dkkl1	504	5.36403e-07	3.2068e-06	0.10728	0.0175939
Zfp503	504	0.000224682	0.00106459	0.0362401	0.0621041
Kcnk1	505	6.55677e-07	3.90576e-06	0.127472	0.0601299
Hmgn3	505	0.000227289	0.00107387	-0.0281782	0.0859574
Mitd1	506	0.000228588	0.00107847	0.0390945	0.0531003
Cyb5a	507	7.01903e-07	4.17361e-06	0.124632	0.0832603
Muc15	508	7.51736e-07	4.46192e-06	0.14372	0.122003
Casp12	508	0.000230511	0.00108599	0.00846391	0.0557075
Scd2	509	8.21551e-07	4.86758e-06	0.0713176	0.0381227
Plk4	509	2.02834e-06	1.15229e-05	0.0372582	0.0319798
Smarcd1	510	0.000249988	0.00117275	0.00503971	0.0431797
Nasp	511	0.000250516	0.00117356	0.0548918	0.0817005
Gpx3	512	0.000126796	0.00061848	0.0406711	0.0259904
Gmppb	513	9.59741e-07	5.65848e-06	0.0577454	0.0343377
Nolc1	513	0.000306058	0.0014176	0.0304886	0.0941102
Emid1	514	9.90601e-07	5.81714e-06	0.123793	0.0243989
Cldn23	514	0.000306462	0.0014176	-0.0168401	0.0617119
Espn	515	1.04642e-06	6.12482e-06	0.0818471	-0.110042
1700025G04Rik	515	0.000318358	0.0014672	0.0431787	0.100223
Gm34006	516	0.000318513	0.0014672	0.0187189	0.0248863
Npc2	517	1.09136e-06	6.35252e-06	0.147319	-0.149265
Ppp3ca	519	1.32093e-06	7.67532e-06	0.126386	0.0163684
Kctd1	519	1.94997e-06	1.10967e-05	0.0984089	0.0888335
Golim4	520	0.000112282	0.000552565	0.0743434	0.0811179
Zfhx3	521	1.32344e-06	7.67643e-06	0.0538096	0.0270345
Stc2	522	1.44505e-06	8.36717e-06	0.0531022	0.0454215
Epgn	522	1.62379e-06	9.32023e-06	0.0379104	0.0318748
Ovol1	523	1.44808e-06	8.37006e-06	0.0976734	-0.0271556
Spp1	523	0.000405595	0.00185032	-1.4728	0.321544
Pnrc1	524	1.55786e-06	8.97327e-06	0.15132	-0.00433754
Tomm5	525	1.57259e-06	9.04238e-06	0.132675	0.0573394
Sltm	525	6.68992e-05	0.000334698	0.104678	0.106266
Napb	526	0.000471954	0.0021354	0.00429688	0.0150832
Slc9a3r1	527	1.62654e-06	9.32023e-06	0.160763	-0.118659
Neat1	527	0.000472697	0.00213584	-0.0365351	0.144057
Fam13a	529	1.86427e-06	1.0664e-05	0.0357487	0.017682
Vrk2	529	0.000437357	0.00199247	0.0154918	0.0186293
Btn1a1	530	1.86803e-06	1.06671e-05	0.114415	0.0775109
mt-Nd4l	530	0.00050322	0.00227066	0.0341065	0.110511
Mpzl1	531	1.9138e-06	1.09097e-05	0.101583	0.0221388
Atp1a1	532	0.000507011	0.00228465	-0.0945385	0.119335
Thap3	533	0.000519527	0.0023347	0.012519	0.0403178
Tnfrsf23	534	2.2924e-06	1.29785e-05	0.053326	-0.0292917
Gbp7	535	2.44957e-06	1.38447e-05	0.0400052	0.0161583
Bora	535	0.000543049	0.00242723	0.0153216	0.0179303
Cyp2f2	536	2.52514e-06	1.42475e-05	0.0328911	0.0236736
Ptms	536	0.000278166	0.00129576	0.116092	0.119543
Acer2	537	2.5746e-06	1.45018e-05	0.0462785	0.032964
Aldoc	538	2.74792e-06	1.54256e-05	0.229374	0.0938978
Lmo7	538	0.000199251	0.000952264	0.0212347	0.0181595
Ift43	539	0.000608951	0.00270717	0.00466281	0.0846754
Ckmt1	540	3.26042e-06	1.82407e-05	0.0945544	0.0739864
Tfap2b	540	0.000612608	0.00271927	0.0319491	0.0432605
Exosc8	541	0.000613315	0.00271927	0.0406607	0.0607549
Pgd	542	4.16012e-06	2.3118e-05	0.11603	0.0728822
Lbp	542	0.000620244	0.00274632	-0.347125	0.161505
Mapk3	543	4.34407e-06	2.40998e-05	0.116115	-0.00243479
Bax	545	4.50936e-06	2.49332e-05	0.134837	0.0510899
Nab2	546	4.81975e-06	2.6605e-05	0.0526599	-0.0181381
C8g	546	0.000691331	0.0030448	0.0012662	0.0116767
Hprt	547	0.000757257	0.0033219	0.0537347	0.0868809
Cenpq	548	5.55996e-06	3.04877e-05	0.0354961	0.00757858
Tspan3	549	0.000764235	0.00334808	-0.053391	0.0970732
4931406C07Rik	550	6.11694e-06	3.34312e-05	0.0961912	0.0675203
Nfic	551	6.84761e-06	3.73629e-05	0.0666897	0.0344456
Irf1	551	0.000792818	0.00346871	0.0197936	0.0306359
Gm20219	552	7.01307e-06	3.82028e-05	0.0571602	0.0116483
Tgm2	552	0.000835617	0.00364153	0.0509753	0.0600793
Fam50a	553	7.38328e-06	4.01534e-05	0.0792	0.0346666
Glipr2	553	0.000945455	0.00409862	-0.0251351	0.0283419
Mxd4	554	7.93481e-06	4.30821e-05	0.104872	0.0799723
Wisp2	554	0.00099861	0.00432094	-0.14281	0.0555848
Mien1	555	8.96045e-06	4.84919e-05	0.137789	0.0244913
Adamts8	555	0.0010351	0.00445805	-0.0128498	0.0154453
Nt5dc2	556	0.00105225	0.00451905	0.0247124	0.0344893
Rrm2b	557	1.01202e-05	5.45899e-05	0.0489069	0.0303967
Serpine2	557	0.00105548	0.00452231	-0.010513	0.068922
Cyp51	558	1.21016e-05	6.49604e-05	0.0465963	0.0369159
Igf2r	559	4.23373e-05	0.000215393	0.0665138	0.0575329
Atrx	560	1.37165e-05	7.32728e-05	0.111482	0.0871328
Cdk14	560	0.00113575	0.00481641	0.0159695	0.0395308
Cst6	561	1.44636e-05	7.70151e-05	0.0620582	-0.0472496
Mtap	561	0.00114018	0.00482284	0.0303892	0.0613218
Gjb1	562	1.55481e-05	8.21297e-05	0.0290101	0.0206375
2810474O19Rik	563	1.56129e-05	8.23407e-05	0.115257	-0.0230656
Lrg1	563	0.00127683	0.00536657	-0.156457	0.173638
Slc12a2	564	1.59277e-05	8.38672e-05	0.0762462	0.0438916
Noxo1	564	6.96038e-05	0.000346658	0.0574024	0.0543814
Ankrd22	565	1.76022e-05	9.22445e-05	0.0688916	-0.0689441
Ogfod3	565	0.00132462	0.00556037	-0.0410393	0.0723035
Atp6v1a	566	0.00136764	0.00573371	0.033814	0.0894566
Psrc1	567	1.78413e-05	9.32024e-05	0.0865265	0.00714152
Etv1	567	0.000232659	0.00109455	0.0497732	0.0456773
Orc6	569	1.86453e-05	9.70964e-05	0.0503715	0.0329783
Herc2	569	0.000312203	0.00144214	0.0501088	0.0523858
Ccne1	571	1.99825e-05	0.000103733	0.0189572	0.0119307
Slc39a1	571	0.00155213	0.0064581	0.000813455	0.0470527
Nhsl1	572	2.08211e-05	0.000107918	0.0621876	0.0371039
Rab15	572	0.00163057	0.00674931	0.00930647	0.0516159
Dhcr7	573	0.00169313	0.00698339	0.0265707	0.0411303
Plin2	574	2.11175e-05	0.000109112	0.17896	-0.0408712
Pgm2	575	2.14068e-05	0.000110435	0.0620837	-0.0146249
BC016548	575	0.00172792	0.00711802	-0.00741096	0.0284465
Pla2g12a	576	2.58598e-05	0.000132994	0.0685231	0.0612919
Gm26917	577	2.70353e-05	0.000138556	0.113678	0.0808038
Gps1	577	0.000220935	0.00104833	0.100928	0.0872656
Klc3	578	2.7067e-05	0.000138556	0.113259	-0.0199644
Aph1c	578	0.00186544	0.00765593	0.0163185	0.0308221
Ifi35	579	4.94239e-05	0.000251061	0.0973227	0.0868728
Cdk2ap2	580	0.000264053	0.00123349	0.0948314	0.0976905
Gsr	581	0.00105335	0.00451905	0.0501056	0.0573769
Ttc3	582	4.1851e-05	0.000213575	0.0975129	0.0611778
Mmp15	582	0.00090078	0.0039152	0.04624	0.049206
Dusp8	583	4.20598e-05	0.000214311	0.0693529	-0.0525509
Ctsc	583	0.00219505	0.00892684	-0.109704	0.0709165
Fndc5	584	0.00219667	0.00892684	-0.0039258	0.0197809
Bcl2a1b	585	0.00223715	0.00908021	0.0107859	0.0240669
Nlrc3	586	0.00107647	0.00460033	0.0188636	0.0192806
Shisa8	587	0.00113755	0.00481785	0.0197566	0.020265
2610524H06Rik	588	5.08414e-05	0.000257866	0.0653892	0.047644
Dcpp2	588	0.0001213	0.000593065	0.0489343	0.0422854
Rras	589	5.18596e-05	0.000262628	0.0837775	-0.0630508
Zfp518b	589	0.0024739	0.00995574	0.00408463	0.0124494
Egln3	590	5.28366e-05	0.000267168	0.117912	0.0218854
Cdk5rap2	590	0.00259106	0.0103893	0.0150774	0.0297154
Egr1	591	5.40022e-05	0.000272645	0.0900334	0.0585834
H2-Aa	591	0.00264518	0.0105807	0.00194794	0.0821882
Xbp1	592	5.61168e-05	0.00028289	0.123628	-0.0198267
Ifitm3	592	0.00264881	0.0105825	-0.425295	0.185781
Usp22	593	6.01643e-05	0.000302833	0.0696835	-0.0109485
Frmd4a	593	0.00265457	0.0105927	0.00312326	0.0276747
Egr3	594	6.23087e-05	0.000313151	0.0369618	0.0255821
Gtf2ird2	594	0.00271179	0.010808	0.00276978	0.0133248
Tgm1	595	6.29068e-05	0.000315678	0.0455089	0.0297483
Fads1	595	0.00276437	0.0110043	0.00379311	0.0298656
Rtp4	596	0.0028965	0.0114751	0.0709613	0.0985496
Selenbp1	597	6.86938e-05	0.000343158	0.0550671	-0.0400709
Proser1	597	0.00298338	0.0118052	0.0288794	0.0371109
Dusp4	599	7.95979e-05	0.000395838	0.0283773	0.000266477
Dnajc2	599	0.00309444	0.0122009	0.0306193	0.0674884
Arfgef3	600	8.05906e-05	0.000399575	0.0453929	-0.0644512
Tango2	601	8.44839e-05	0.000418252	0.0376516	0.0202078
Bbc3	602	8.65512e-05	0.000427847	0.0679566	-0.0685099
Tbccd1	606	0.000722667	0.00317858	0.0141989	0.0155715
Npnt	607	0.000117548	0.000575915	0.0826577	0.0288462
Mocs2	607	0.00371054	0.0144751	-0.0230987	0.0738318
Rbms2	609	0.000121406	0.000593065	0.0759902	0.00708443
3830417A13Rik	609	0.00239082	0.00965657	0.0167609	0.018268
Rhob	611	0.000136161	0.000662209	0.12747	-0.189998
Atad2	611	0.000283285	0.0013159	0.0340885	0.0316594
Prlr	612	0.000137816	0.000669278	0.0677798	0.0439866
Depdc7	612	0.00311963	0.0122856	0.0180546	0.0204613
Igtp	613	0.000140728	0.000682416	0.0834753	0.0503095
Ckap2	614	0.000396563	0.00181161	0.0232067	0.0214133
Unc119	615	0.000162898	0.000785327	0.0616908	0.00734314
Cyb5r3	615	0.00145269	0.00607489	0.0743396	0.0737754
Rassf3	616	0.000176878	0.000849013	0.0426	0.0129587
Cald1	617	0.00018301	0.00087717	0.116076	-0.255706
Psmd1	617	0.00459668	0.0177026	-0.0447397	0.0750528
Ogfr	618	0.000183273	0.00087717	0.0851005	0.00195397
2610301B20Rik	618	0.00462274	0.0177616	0.0107876	0.0150009
Acin1	619	0.00462939	0.0177666	0.0300666	0.0715606
Prr15l	620	0.00166507	0.00687619	0.0129451	0.0122316
Mettl1	621	0.000348993	0.0015965	0.053428	0.0527216
Acox1	622	0.000214551	0.00102042	0.0855287	-0.00900656
Epsti1	623	0.0051438	0.0196724	0.0101284	0.042571
Rnf128	624	0.000226641	0.00107233	0.0635177	0.00959978
Mphosph6	624	0.00520775	0.0198711	0.0221763	0.0528799
Dlx5	625	0.00239789	0.00967332	0.0488734	0.0504267
L1cam	626	0.000238619	0.001121	0.0321486	-0.00321868
Lipt2	626	0.00103417	0.00445805	0.0332856	0.0301526
Ybx3	627	0.000460094	0.00208744	0.0732976	0.0605175
Irgm2	628	0.000256069	0.00119788	0.0195606	0.00764889
Hist1h1d	629	0.00109589	0.00467127	0.0170225	0.0144507
Lurap1	630	0.000268181	0.00125101	0.0392884	0.00872558
Amn1	630	0.00342007	0.0134051	0.0383694	0.0456179
Ggt1	631	0.000281798	0.00131084	0.0357001	0.0164352
Pcm1	632	0.000523061	0.00234739	0.051584	0.0464542
Cdc42ep5	633	0.000283932	0.00131706	0.0727627	-0.0489911
Tmem108	633	0.00669418	0.0252518	0.00791191	0.00865467
Gstt3	636	0.0070215	0.0264264	-0.00936812	0.075361
Ddx18	637	0.0073079	0.0273798	0.0119678	0.0598458
Txndc12	638	0.000325745	0.00149843	0.0783167	0.0679512
Cnmd	638	0.00753455	0.0281653	-0.0132852	0.0200875
Noa1	639	0.000326478	0.00149971	0.0381971	0.0178764
Tesc	641	0.000339452	0.00155716	0.021331	0.00683444
Gbp3	642	0.00034059	0.00156021	0.0562665	0.0387621
S100a4	642	0.00826976	0.0308093	0.00765822	0.042207
Acbd4	643	0.00837558	0.0311684	0.0158758	0.0359357
Lyar	645	0.00861128	0.0319379	0.0584379	0.0758321
Fcor	646	0.00906463	0.0334321	-0.00128512	0.0125695
Ncoa7	647	0.000539159	0.00241636	0.0465716	0.0416375
Tfap2c	648	0.000458045	0.00208385	0.0588149	0.0377219
Apol7a	649	0.000459333	0.00208685	0.0577732	0.0102649
Il3ra	649	0.00938428	0.0344958	0.00825424	0.0136961
Brd3	650	0.0093992	0.0345124	0.0265115	0.0454011
Mospd1	651	0.000465096	0.00210725	0.0598564	-0.0106398
Ehf	651	0.00477617	0.0182875	0.073809	0.0797036
Gdpd1	652	0.000513765	0.00231194	0.0338729	-0.0448741
mt-Atp8	654	0.00995745	0.0365049	0.0550645	0.0711638
Carhsp1	655	0.000542557	0.00242723	0.0806082	0.0210947
Etfbkmt	655	0.00996391	0.0365049	0.00841507	0.00690542
Dpm2	656	0.000551894	0.00246344	0.0674983	0.00665901
Wee1	657	0.000598266	0.00266683	0.047392	-0.0742452
Lrrc51	658	0.000608399	0.00270717	0.0286058	-0.0139176
Kmt5a	659	0.000632933	0.00279876	0.0776717	0.0299401
Iigp1	660	0.000638745	0.0028207	0.0825158	0.0673272
Cdt1	660	0.00529856	0.0201711	0.0237769	0.0252117
Tsc22d1	661	0.000667147	0.0029422	0.111563	-0.0707744
Zfp367	661	0.00376077	0.0146365	0.0139328	0.0131342
Tspan6	662	0.0108721	0.0395696	0.0145909	0.032351
Ccl7	663	0.0109623	0.0398541	0.00573557	0.0127263
Xdh	664	0.000731483	0.00321309	0.0602094	0.0399792
Sms	664	0.0110137	0.0399814	-0.0443765	0.0674266
Sept9	665	0.0110215	0.0399814	-0.0608314	0.0569631
6030458C11Rik	666	0.000799097	0.00349157	0.0247611	0.0213705
Iqgap2	666	0.011103	0.0402332	0.00721031	0.0240515
Irx5	667	0.000821041	0.00358272	0.0869517	0.026316
Casp8ap2	667	0.011626	0.0419905	0.0218638	0.0289605
Pcna	668	0.0117804	0.0425019	-0.0383374	0.0558963
Tubb2b	669	0.000896665	0.00390244	0.115703	0.060409
Haus8	669	0.0120083	0.0432299	0.0142919	0.0296991
Gm47283	671	0.000935942	0.0040627	0.0702069	0.0572098
Dcpp3	671	0.001065	0.00455722	0.0253427	0.0208003
Lgals2	672	0.0122474	0.0440427	-0.00808948	0.0061476
Arid5b	673	0.000999347	0.00432094	0.0718711	-0.0717736
Mal2	673	0.0119145	0.0429388	0.0454086	0.0477188
Gm45589	674	0.00100889	0.00435652	0.0318968	0.00664119
Bcl2	675	0.0124504	0.0447242	-0.0212313	0.0292583
Hsf2bp	676	0.00103708	0.00446078	0.0191796	0.0135008
Ddx3x	677	0.0127887	0.04584	0.0215938	0.0811827
Cda	678	0.0128632	0.0460573	0.0229274	0.0302287
Hey1	680	0.00109056	0.00465455	0.0431019	0.0341258
Dapk2	680	0.0132143	0.0471612	-0.00579694	0.0169507
Ncapg2	681	0.00124791	0.00525168	0.0207285	0.0171451
Mif4gd	682	0.00112173	0.00477528	0.0908372	-0.00690375
Pmepa1	682	0.0134685	0.0479654	-0.164076	0.0959791
Rp9	683	0.00112784	0.00479514	0.0790405	0.0690339
Cd74	683	0.0137143	0.0487359	-0.0953727	0.170358
Hist1h2ac	684	0.00113216	0.00480732	0.0267855	-6.45386e-05
Plk3	685	0.00114835	0.0048512	0.0658555	-0.078598
Timm29	687	0.0141529	0.0502404	0.00278859	0.0346905
Clint1	688	0.00120896	0.00510072	0.0737234	0.0178253
Dync1i2	689	0.00122337	0.00515498	0.0769776	0.038107
Sqle	689	0.0102885	0.0375695	0.0352481	0.0402633
Cd151	692	0.00137311	0.00574937	0.0806597	0.0357738
Slc39a4	692	0.00720903	0.02704	0.019144	0.0205914
Gpsm3	694	0.0148995	0.0526088	0.0141636	0.0286085
Pbxip1	695	0.0148462	0.0524767	0.0277437	0.0333501
Bnip3	696	0.00148414	0.00619856	0.0488962	-0.129957
Ccl6	696	0.0150514	0.0530322	0.00960491	0.0218555
Cryab	697	0.015863	0.0557139	-0.406964	0.120585
Tctn3	698	0.00151405	0.00631555	0.0150897	-0.00447978
Ctdspl2	698	0.015986	0.0560865	-0.00714623	0.0261628
Selenos	699	0.0160316	0.0561868	0.0290566	0.080194
Svil	700	0.00152107	0.00633681	0.0633359	0.055953
H2-Ab1	700	0.0161078	0.0563347	-0.0335897	0.100241
Mgam	701	0.00157329	0.00653793	0.0220515	0.00512189
Fbxw4	702	0.00159942	0.00663821	0.0439944	-0.0175659
Samhd1	703	0.0016173	0.00670401	0.0470007	0.0216948
Gjb2	703	0.0167651	0.0584306	0.0355074	0.0427068
Klk14	704	0.00163231	0.00674931	0.0311854	-0.00887768
Pigr	704	0.0167776	0.0584306	0.0441239	0.0669724
Eif1b	705	0.0171712	0.05959	0.00384804	0.0445058
Zfp395	706	0.0019644	0.00804214	0.0261651	0.0225268
Arl6ip1	707	0.00173251	0.00712805	0.0811517	-0.00376126
Tfap2a	708	0.00898469	0.0332113	0.0440439	0.0494017
Ccdc88a	709	0.0182414	0.0627369	0.0266325	0.0504914
Gadd45a	710	0.00180737	0.00742681	0.0781468	-0.121271
Csn1s2b	711	0.0184308	0.0633224	0.0081394	0.0175321
Kmt2e	712	0.00194131	0.00795743	0.0568326	0.0296648
Asrgl1	712	0.0189491	0.0649685	-0.115667	0.0462248
Scrg1	714	0.00197803	0.00808795	0.0477225	-0.0221557
Carf	714	0.0192783	0.0660286	0.00574744	0.00775358
Mpp6	715	0.00212273	0.00866891	0.0696675	0.0433824
Dtx3l	716	0.00213977	0.00871973	0.0382313	-0.00363484
Plac8	716	0.00413605	0.016003	0.0152069	0.0129415
Pdk1	717	0.00214044	0.00871973	0.0331469	0.0192897
Trim46	717	0.0196473	0.0671537	-0.050675	0.0430732
Prtn3	719	0.0198884	0.0678378	-0.0205156	0.0147808
Coro1c	720	0.00227469	0.00922128	0.0577132	-0.0671488
Srpk2	720	0.0100375	0.0366933	0.060978	0.0719342
Itpk1	721	0.00230331	0.00932586	0.0268775	-0.00932844
Znrd1as	721	0.0201135	0.0685348	0.0118256	0.0172832
Apobr	722	0.0023574	0.00953322	0.0512087	0.0201194
Cfb	724	0.0213855	0.0727194	-0.0154069	0.0290924
Sp140	725	0.00243296	0.00980286	0.0615648	-0.0504318
Papln	725	0.0216618	0.0735081	0.00508491	0.0250981
Cmpk2	726	0.00251852	0.010123	0.0346757	-0.0013196
Bpgm	726	0.0219368	0.074289	0.00318014	0.0395757
Cep290	727	0.00527271	0.0200958	0.0380661	0.0345202
Lima1	728	0.00256384	0.0102927	0.0537586	0.0322212
Nfe2l3	729	0.00260352	0.0104267	0.0234531	0.00582333
Gm26601	729	0.0239552	0.0807938	0.00403915	0.00781231
Armcx3	732	0.00279882	0.0111281	0.0563722	0.0182338
Ptn	733	0.00286787	0.011389	0.0362486	0.0264696
Pogz	733	0.0256393	0.0860359	0.00593516	0.0220961
Slco2a1	734	0.00287423	0.0114005	0.0710234	-0.0127947
Tmem263	735	0.00302036	0.0119373	0.0361272	0.0258384
Hrct1	736	0.00304913	0.0120366	0.0401087	0.0241008
Cnnm2	736	0.0263698	0.0883976	-0.00238833	0.0187816
Me1	737	0.003149	0.0123866	0.084165	-0.0124857
Gm12216	737	0.026694	0.0892134	0.0122823	0.0183931
Rin2	738	0.00329619	0.0129502	0.0631488	0.0261581
A630023A22Rik	738	0.0267335	0.0892553	-0.00673967	0.0177512
Nexmif	739	0.00341314	0.0133937	0.0157433	0.00592616
Mafb	739	0.0268451	0.0895378	0.0408082	0.0672617
Tfrc	740	0.00353425	0.0138362	0.0286875	0.00427536
Timm9	740	0.0269375	0.0897556	-0.0492689	0.0665498
Egln1	741	0.0035406	0.0138447	0.0227726	-0.00337131
Trim7	741	0.0270669	0.0900817	0.000207191	0.0272299
Phip	742	0.00359076	0.0140243	0.0531661	0.0325653
Il15ra	742	0.027117	0.0900817	0.00609746	0.021907
Lmnb1	743	0.00371965	0.0144935	0.031562	0.00665256
Nop56	744	0.0274815	0.0911097	-0.139015	0.0671282
Sp3os	745	0.003863	0.0150167	0.046532	0.0235781
Asf1a	746	0.00390084	0.0151461	0.0517695	-0.0143003
Crip1	746	0.0275735	0.0913236	0.00846944	0.0257979
Fam57a	747	0.00392874	0.0152365	0.0329142	0.00834812
Ccdc173	747	0.0282044	0.0932267	0.00867334	0.0130048
Ccl20	748	0.00404639	0.0156744	0.0464041	0.00155826
Gipc2	748	0.0063333	0.0239178	0.0162209	0.0128349
Rassf4	749	0.0283453	0.0935057	0.0132632	0.0224013
Slc30a1	750	0.0042602	0.0164642	0.043452	-0.0203116
Tmem140	751	0.00444591	0.0171618	0.0178594	0.00706483
Chst2	752	0.00451617	0.0174127	0.0239992	0.0269768
Nat8	752	0.0292823	0.0961179	0.00419624	0.012175
Larp1b	753	0.00460272	0.0177052	0.0589754	0.0562124
Gclc	754	0.00467599	0.0179246	0.0272937	0.0230542
Dclk1	754	0.0295907	0.0968801	-0.00822327	0.00956064
Ilf2	756	0.0303543	0.0990477	0.0205057	0.0606745
Ptx3	757	0.030504	0.0994384	-0.000872645	0.022529
Prrg4	758	0.00516505	0.0197308	0.0434539	-0.00310065
Trim27	758	0.0306503	0.0997209	-0.0452845	0.0520855
Sh3pxd2b	759	0.0317642	0.102953	-0.00632407	0.0362297
Tle1	760	0.00535294	0.0203547	0.0341253	0.0210181
Pgpep1	760	0.0321325	0.103827	-0.00343543	0.0420615
Lcp1	762	0.0057523	0.0218482	0.0179314	-0.00170518
Zfp207	762	0.0217031	0.0735728	0.0431768	0.0575305
Fsd1l	763	0.0060854	0.0230869	0.0303723	-0.0165787
Angpt1	763	0.0333213	0.10725	-0.0125407	0.011731
Elovl1	764	0.00611622	0.0231773	0.0743975	0.0266906
Dcaf17	764	0.0334323	0.107398	0.0161372	0.0235504
Ctdsp2	765	0.00612646	0.0231895	0.0491237	-0.145187
Fbxo32	765	0.0345453	0.110545	-0.086604	0.052669
Pycard	766	0.00896089	0.0331603	0.0306259	0.0277918
Abhd17c	767	0.00632876	0.0239178	0.0536195	0.0240358
Slc29a3	767	0.0171825	0.05959	0.0203011	0.0189214
Zbtb37	768	0.0353361	0.112899	0.00718633	0.0137591
Vim	769	0.035349	0.112899	-0.0317745	0.0343674
Trim21	770	0.0178622	0.0616785	0.0142127	0.0137265
Eppk1	772	0.00700246	0.0263847	0.0271674	-0.0178233
Igfbp3	772	0.0361337	0.114851	-0.027381	0.0151244
Stambpl1	773	0.00710309	0.0267031	0.0281836	0.010529
Odc1	773	0.0366683	0.116438	-0.0101344	0.0578151
Sytl1	774	0.00713054	0.0267759	0.0374513	0.011531
Mapk8	774	0.0371303	0.117793	-0.0201903	0.0327942
Pcsk5	775	0.0379408	0.120019	-0.0126569	0.00738221
Foxo3	776	0.00748284	0.0280036	0.0476847	0.0254936
Slc43a3	777	0.0382197	0.120786	-0.0574039	0.0256977
Fam43a	778	0.00794766	0.0296761	0.0137713	-0.00114212
Mxi1	779	0.00805478	0.0300422	0.0227633	-0.0423951
H2-Q7	779	0.0403062	0.126896	0.0286679	0.0675977
Srpk1	780	0.0408884	0.128444	-0.0065541	0.0462522
Enpp1	781	0.0409145	0.128444	-0.00435478	0.0226509
Bcl2l1	782	0.0084503	0.0314112	0.0532629	-0.00909386
Nipal1	783	0.00847999	0.0314863	0.0503511	-0.0361204
Setd7	783	0.0150153	0.0529614	0.0207161	0.0193128
Slk	785	0.00892294	0.0330568	0.0433952	-0.00612341
Casp8	785	0.0436049	0.136502	-0.0231456	0.03343
Jdp2	786	0.0436636	0.136557	-0.00627324	0.0115303
Gm20442	787	0.00902776	0.0333333	0.0135041	-0.00653587
Nmi	787	0.0451712	0.140608	0.0195608	0.0343043
Pnpla2	790	0.00918377	0.0338156	0.0550842	-0.0481371
Gm4951	790	0.0467285	0.145014	0.00821736	0.0148926
Snx21	791	0.00918901	0.0338156	0.0395839	-0.0330827
Lsm2	791	0.0160946	0.0563347	0.0522435	0.0399359
Marveld2	792	0.00998968	0.0365589	0.0387783	-0.00231752
Olfml3	792	0.048411	0.149708	-0.148577	0.0362739
Barx2	794	0.0104587	0.0381257	0.0186205	0.0149994
Slc44a2	795	0.0104638	0.0381257	0.0230169	0.0152938
Gm13075	795	0.0497637	0.153604	0.00675737	0.0183681
Ceacam10	796	0.0498148	0.153619	0.0190759	0.0455245
Plec	797	0.0113654	0.0411392	0.0714444	0.00793691
C130026I21Rik	798	0.0114785	0.0415031	0.0523903	-0.0169277
Arhgdib	798	0.0500116	0.154082	-0.0402226	0.00783159
Ap1s3	799	0.0127303	0.04568	0.0319757	0.0300782
Vamp5	799	0.050296	0.154815	-0.0322734	0.0250605
Thbs1	800	0.0342066	0.109567	0.0526954	0.0672567
Chka	801	0.0131184	0.0469203	0.054182	-0.000400999
Med24	801	0.0519168	0.159507	-0.00720401	0.0384217
Ly6a	802	0.0131575	0.0470093	0.0582558	-0.00419112
Sh3bgrl	802	0.0522852	0.160068	0.00216526	0.0439791
Colec12	803	0.0133713	0.0476704	0.0274627	-0.0333083
Rac3	803	0.0248368	0.0836821	0.0682398	0.0503332
Bod1l	804	0.0135094	0.0480592	0.0486438	-0.00124534
Chd2	805	0.0142783	0.0506314	0.0392377	0.011043
Mybl1	805	0.0539321	0.16463	-0.000400819	0.0145648
Ccdc163	806	0.0144477	0.0511773	0.0260863	-0.0110171
Arl4c	806	0.0317999	0.102953	0.0305757	0.0318751
Chit1	807	0.0145901	0.0516265	0.00737506	-0.00378071
Suox	807	0.0545161	0.166106	0.00383069	0.00929516
Taf1d	808	0.0177232	0.0614009	0.060424	0.0583097
Hacd4	809	0.0553275	0.168269	-0.0276255	0.0224385
Rnf181	810	0.0150756	0.0530608	0.0389419	0.00726453
Slc34a2	810	0.0556973	0.169083	0.00583421	0.0116287
Calml3	811	0.0158394	0.05569	0.0141425	-0.00606872
Cd200	811	0.0558023	0.169247	-0.0617968	0.0461353
Maoa	812	0.0560548	0.169702	-0.00569612	0.0274661
Apol9a	813	0.0162295	0.0567004	0.0562271	-0.0181865
Sorcs2	813	0.0565247	0.170812	-0.00152925	0.00788029
Smpdl3a	814	0.0163901	0.0572013	0.0278437	-0.00388
Bcam	815	0.0574069	0.173162	-0.0316716	0.0100763
Daxx	816	0.0168036	0.0584597	0.0363305	0.00525287
Slc4a7	816	0.0576302	0.173677	-0.00245009	0.0181617
Arid1a	817	0.0171236	0.0595104	0.0472023	0.0415764
Ftl1-ps1	820	0.0178487	0.0616785	0.0590889	0.0382893
Gsto1	820	0.0589989	0.177479	0.0174085	0.0635306
Aldoa	821	0.0178521	0.0616785	0.0928687	-0.433537
Agl	821	0.0295254	0.0968201	0.0183027	0.0168848
Macc1	822	0.0178778	0.0616785	0.0403459	0.00577841
Plxnb2	822	0.0590869	0.177582	0.0202255	0.037458
Tcaf1	823	0.0181267	0.0624722	0.0423829	-0.00701753
Slc2a6	823	0.0597903	0.179122	0.000279945	0.0097086
Trp53inp1	824	0.018148	0.0624806	0.028856	0.000253206
Ncoa3	824	0.0598154	0.179122	0.0095045	0.0220494
Syt8	825	0.018471	0.0633946	0.00760665	-0.00957711
Cited1	826	0.0194546	0.0665636	0.018301	0.0115778
D17H6S53E	826	0.0615984	0.183962	0.00759292	0.00902998
Bhlhe40	827	0.0622498	0.185657	-0.0295503	0.0312585
Hspa4l	828	0.0198202	0.0676749	0.0355859	0.00905871
AI480526	828	0.062278	0.185657	0.00588592	0.00679952
Acadl	829	0.0482446	0.149333	0.042173	0.0453922
Flrt3	830	0.0315821	0.102549	0.0163301	0.0171688
Ppid	832	0.0637809	0.189795	-0.0326075	0.0271015
Ankrd37	833	0.0209638	0.0713587	0.0110526	-0.000652354
Stap2	834	0.0215028	0.0730434	0.0545633	0.00996587
Gcfc2	835	0.0333004	0.10725	0.00923978	0.00946223
Rpap1	836	0.0226643	0.0766743	0.0153484	0.00664056
Lrrc61	837	0.0229899	0.0776966	0.00631516	1.50536e-06
Dnajb4	837	0.0333757	0.107321	0.0294769	0.0318382
Nek7	838	0.0236536	0.0798579	0.043394	-0.00539044
Fryl	838	0.0668185	0.198009	-0.0292294	0.0200496
Lpin1	839	0.0668401	0.198009	0.00485219	0.0108453
Stk39	841	0.0250043	0.0841185	0.055102	0.0453849
Lrrc26	841	0.0679893	0.201054	0.00638168	0.0210971
AC160336.1	842	0.0250171	0.0841185	0.0169433	0.000749859
Cpne8	842	0.0681343	0.201303	-0.0284972	0.0291966
Zfp296	843	0.0252522	0.0848227	0.0182502	0.00347637
Lyst	843	0.0688795	0.202962	-0.0161795	0.0138492
Eif2ak2	844	0.0458774	0.142539	0.0293619	0.0384581
Arfgap3	845	0.0264115	0.0884478	0.0383784	-0.0515605
Snrpa1	845	0.0698807	0.205364	0.00781662	0.0492674
Tssc4	846	0.0266785	0.0892134	0.028169	0.0203527
Lama5	847	0.0270931	0.0900817	0.0362633	-0.0108477
Gm17619	847	0.0703197	0.206321	0.0103855	0.0177436
Batf2	848	0.0271662	0.0901548	0.0117688	0.00695792
Lgals1	848	0.070331	0.206321	-0.0336585	0.0822805
Peak1	850	0.0708427	0.207638	-0.0521234	0.0363331
Pih1d2	851	0.0281292	0.0930709	0.01396	0.012902
Selenom	851	0.0743043	0.217207	-0.0871294	0.0472964
Hpcal1	852	0.0283256	0.0935057	0.0362877	0.000529886
Slc28a3	853	0.0285842	0.0941998	0.0496404	-0.0335363
Tmc5	853	0.0522928	0.160068	0.00989031	0.0117151
Ar	854	0.0288434	0.0949596	0.021842	-0.00729284
Krt15	854	0.0786615	0.228934	0.00191185	0.0144622
Abcd4	855	0.0289432	0.0951936	0.0204237	0.0143143
Fkbp11	855	0.0467616	0.145014	0.0157206	0.0189431
Serpinb6a	856	0.0291826	0.0958857	0.0553455	-0.0661704
Tmem106a	857	0.0296174	0.0968801	0.0238869	0.00927502
Chchd7	857	0.0845055	0.244438	0.0129056	0.0286787
Tmem41b	858	0.0296315	0.0968801	0.040334	-0.0140622
Pole4	858	0.0847734	0.244999	-0.000102049	0.0625416
Sparcl1	859	0.0867532	0.250285	-0.0593769	0.0290237
S100a3	860	0.0301032	0.0983251	0.0227015	-0.00553818
Ecscr	861	0.0886418	0.254845	-0.0323421	0.0148143
Ifi47	862	0.0306509	0.0997209	0.0369501	0.033289
Apoc1	862	0.0378443	0.119828	0.0230713	0.0202773
A530032D15Rik	863	0.0314402	0.102188	0.0149579	-0.00683955
Klk1b27	863	0.0888754	0.255074	-0.00671736	0.0109409
Cspg5	864	0.031771	0.102953	0.0121758	-0.00585893
Adgrg1	864	0.090388	0.259012	-0.0241565	0.0192874
Camk1	865	0.0320552	0.103678	0.0553073	0.0340406
Spaar	865	0.090404	0.259012	0.00629229	0.0127201
BC017158	866	0.032828	0.105971	0.0109096	0.00671879
Homer2	866	0.0911738	0.260542	0.00554377	0.0340682
Lgalsl	867	0.0331825	0.107011	0.0332331	0.0240608
Tacc1	867	0.0944154	0.268877	-0.00640339	0.0187831
Ephb4	868	0.0335399	0.10764	0.0199049	0.00570912
Rgs2	868	0.0945797	0.269113	0.0151622	0.0287612
Sesn2	869	0.0336694	0.107951	0.035123	-0.0293322
Rrp9	870	0.096009	0.272478	-0.0527456	0.0292621
Ireb2	871	0.0354491	0.113109	0.0289286	0.00503679
C3	871	0.0967128	0.274006	-0.0165734	0.0120089
1700066M21Rik	872	0.0356714	0.113709	0.00755402	0.00718749
Ddit3	873	0.0358813	0.114268	0.0407838	-0.0999999
Mapk13	873	0.0984274	0.278347	-0.0133689	0.0478925
Ccng2	874	0.0361136	0.114851	0.0300769	-0.00055152
4932422M17Rik	875	0.0990577	0.279454	0.00596937	0.0097606
Qser1	876	0.0377618	0.119681	0.0264417	0.000205208
Parp10	876	0.0992221	0.27968	0.00897862	0.0190964
2810454H06Rik	877	0.0999235	0.281178	0.00533956	0.00839211
Ctgf	878	0.0382672	0.120821	0.0173974	-0.0251813
Ssb	878	0.101095	0.283993	-0.0856211	0.0520039
Kcnq1ot1	879	0.10121	0.284074	-0.024753	0.0526709
Scx	880	0.0388016	0.122391	0.0109549	0.00220102
Icam1	880	0.103341	0.289062	-0.0190063	0.0147521
Txndc9	881	0.0398168	0.125474	0.061271	-0.0387185
Ift27	881	0.103423	0.289062	-0.0232648	0.0298073
Xndc1	882	0.0403509	0.126916	0.00904508	0.00745604
Car5b	884	0.0416077	0.130497	0.0239899	0.0132611
Lyzl4	885	0.0425042	0.133183	0.012465	-0.0192681
Pick1	887	0.0440813	0.137733	0.0216177	-0.00775955
Parp9	887	0.109497	0.303478	0.0166393	0.0246261
Hsd17b2	888	0.0444497	0.138754	0.0131715	-0.00621403
2210407C18Rik	888	0.111569	0.30793	-0.0121805	0.0123882
Map1b	889	0.0445248	0.138848	0.0733307	-0.164677
Tmem176b	889	0.111666	0.307941	-0.148292	0.0634072
Ttc30b	890	0.0445639	0.138848	0.0107839	0.00666462
Cited2	890	0.055945	0.169524	0.0690918	0.0654211
Akr1b8	891	0.0458682	0.142539	0.0152904	-0.00494273
Tapbpl	891	0.109815	0.304102	0.0114844	0.017254
Rasgef1c	892	0.112945	0.310951	-0.00488959	0.0151585
Hyal1	894	0.0477409	0.147912	0.0190592	0.00393813
Hacd3	894	0.113528	0.311835	-0.0756886	0.0261228
Tdp2	895	0.0492442	0.152143	0.0259525	0.0059046
Wdcp	895	0.0572547	0.17286	0.0143783	0.016164
Chd8	896	0.114097	0.313082	0.0146395	0.0258652
Xpc	897	0.0516756	0.158913	0.0182478	-0.0108653
Srebf1	897	0.117531	0.321173	0.00223383	0.0268897
Mknk2	898	0.0519967	0.159604	0.0243844	-0.00419528
Dusp10	899	0.0522175	0.160068	0.0107362	-0.0210933
Pde5a	899	0.11815	0.322333	0.00433279	0.00154755
Synpo	901	0.11879	0.323813	0.00364384	0.0116794
Bend5	902	0.0525766	0.160788	0.0260292	0.00778467
Naglu	902	0.11912	0.323932	-0.0232425	0.0215003
Acrbp	903	0.0528942	0.16161	0.00902096	-0.00020405
Odf2	904	0.0541793	0.165232	0.0226016	0.0200716
Rilpl2	904	0.0633302	0.188624	0.0179946	0.023006
Gne	905	0.0547432	0.166645	0.0251856	0.0172352
Ccng1	906	0.0555138	0.16868	0.0405289	-0.00252402
Tjp3	906	0.122585	0.331429	0.00969806	0.0150542
Creb5	907	0.0563452	0.170425	0.0363468	-0.07467
Zfp451	907	0.123681	0.333721	-0.0488694	0.0243243
Gm15860	908	0.124034	0.334255	-0.000241318	0.0062053
Dhx58	909	0.0584605	0.176019	0.022385	-0.00696232
Ubn1	910	0.0592014	0.177693	0.0384377	0.0234851
Slc24a5	910	0.0648661	0.192851	0.0103194	0.0118772
Lasp1	911	0.0592312	0.177693	0.0386879	-0.0773702
Sema4c	911	0.125806	0.338482	0.00114916	0.00599164
Irf2	912	0.0606051	0.181323	0.0302842	0.011118
Rnpc3	912	0.12671	0.340636	-0.0133472	0.0246353
Serping1	913	0.127915	0.343596	-0.0168551	0.0025142
Gm26890	914	0.128344	0.343916	-0.0030615	0.00766287
Azin1	915	0.061427	0.183616	0.0291321	0.0137339
Prkca	915	0.128374	0.343916	-0.00639187	0.0351296
Spns2	917	0.128679	0.343916	0.0143236	0.0317995
Psip1	919	0.0658415	0.195576	0.0351095	-0.00165924
Nol8	919	0.130656	0.347856	-0.0228131	0.0222495
Cwf19l2	920	0.0659471	0.195714	0.0195047	0.0100665
Ggta1	920	0.131428	0.34963	-0.015907	0.0105767
Lix1l	921	0.132458	0.351241	0.00412802	0.0213657
Bglap3	922	0.0674613	0.199671	0.0176758	0.00343663
Pttg1	922	0.133593	0.353686	-0.0574181	0.0376647
Chd7	923	0.0682488	0.201462	0.0278821	-0.0967677
Zcchc8	923	0.0684836	0.201975	0.017705	0.0183471
Epha4	924	0.137482	0.362244	-0.0046391	0.00363697
Brwd3	925	0.0689561	0.203007	0.0174808	-0.0017091
Adrb2	927	0.0736196	0.215586	0.0131935	-0.00734549
Smoc1	927	0.138648	0.365026	-0.00500615	0.00539232
Ints6l	928	0.0693927	0.204111	0.00349128	0.00276929
Ppl	929	0.0740533	0.216665	0.032586	-0.0498073
Saa2	929	0.0871114	0.250881	0.0209181	0.0201049
Gm26699	930	0.135654	0.358282	0.0214068	0.0275128
Irf6	932	0.0750287	0.219132	0.0401086	-0.0971249
Runx1	932	0.14266	0.374696	-0.0361625	0.0489681
Zhx2	933	0.143239	0.375918	-0.0058326	0.00679358
Ddx58	934	0.077124	0.225052	0.0212632	0.0124547
2700097O09Rik	935	0.0774532	0.225814	0.0204401	-0.00376488
Col9a3	935	0.146812	0.384379	-0.0178586	0.0490409
Nsd2	936	0.0783535	0.228238	0.0290592	0.0168552
Slc5a3	936	0.148335	0.387755	-0.0161815	0.0171041
Chmp4c	937	0.0792243	0.230167	0.045106	-0.0445826
Trmt1l	937	0.149251	0.389841	0.00116441	0.0147586
AC149090.1	938	0.0793122	0.230221	0.0191405	0.0125838
Nacc2	938	0.153672	0.400128	-0.00284814	0.00859458
Gm15446	939	0.0797281	0.231225	0.00730938	-0.00311376
G3bp2	939	0.15672	0.407102	0.0138727	0.031838
Rassf10	940	0.140388	0.369313	0.00572198	0.0076883
Kit	941	0.0790434	0.229844	0.0194251	0.01878
Fam84a	941	0.157212	0.408061	-0.0427364	0.0122128
Lbh	942	0.0830387	0.240616	0.00903891	0.00126183
Itgb3	943	0.0833598	0.241336	0.0105783	-0.00857458
Tulp3	943	0.157941	0.409312	0.00664971	0.0104072
H2-T22	945	0.0854987	0.24688	0.0388447	0.00107663
Tgfb2	945	0.159369	0.412366	0.0197095	0.0319267
Id3	946	0.0869698	0.250691	0.0108741	-0.0296471
Sod2	946	0.160431	0.414792	-0.0739146	0.0401869
Acbd5	947	0.161042	0.416046	-0.0104131	0.0227992
Fmnl2	948	0.161273	0.416318	-0.00202498	0.0107986
Tnnt2	949	0.0886231	0.254845	0.0172419	-0.0092697
Gstt1	949	0.162093	0.417502	-0.0185325	0.0168461
Tpm1	950	0.0888659	0.255074	0.0574694	-0.0624908
Cd24a	950	0.16211	0.417502	-0.0205263	0.0631725
Flot1	951	0.0908113	0.259954	0.0329602	0.0178287
BC100530	952	0.0909016	0.259988	0.0145222	-0.0321391
Sil1	952	0.162501	0.418185	-0.0158091	0.0326231
Tspan4	953	0.0914283	0.261044	0.0241496	-0.000100765
Bbox1	954	0.162679	0.418317	-0.00506495	0.00430055
Snta1	955	0.164796	0.421796	-0.0716915	0.0262412
Fndc10	956	0.0921942	0.263003	0.0137582	0.00877643
6330418K02Rik	956	0.167251	0.42775	0.000383951	0.00502418
Acod1	957	0.167671	0.428163	-0.00450496	0.00352729
Pdlim4	958	0.0926442	0.26406	0.0105711	0.00445476
Plscr2	958	0.168217	0.429225	-0.0158784	0.021248
Wfdc17	960	0.172658	0.43786	0.00169682	0.0107023
Hat1	961	0.0954914	0.271241	0.0226695	0.00834418
Pcdhb7	961	0.174451	0.441729	0.000823277	0.008433
Insig1	962	0.0962361	0.272889	0.00828556	0.000207715
Il1rn	962	0.174791	0.442252	0.0041217	0.0104364
Hp	964	0.177469	0.447158	-0.0686981	0.00690068
Iffo2	965	0.0981139	0.277738	0.0246218	-0.00989658
Smim3	965	0.17754	0.447158	-0.00634937	0.00864286
Ahdc1	966	0.098497	0.278347	0.0187698	0.00357257
Matn4	967	0.178896	0.45023	0.000328739	0.0119615
4430402I18Rik	968	0.0989271	0.279323	0.0226113	-0.0128059
Fundc2	968	0.179621	0.451712	-0.00254041	0.00598875
Ctnnb1	969	0.0994621	0.280118	0.0474195	0.00608255
Rasl11b	969	0.180772	0.454261	-0.00744369	0.00398145
Irgm1	970	0.10085	0.283545	0.0215067	0.0177716
Gigyf1	971	0.101615	0.284861	0.0133729	-0.0164939
Dgkq	971	0.182556	0.457355	0.000286873	0.00858191
4632415L05Rik	972	0.101662	0.284861	0.00934562	0.00392101
Gm29666	972	0.163853	0.420367	0.00879935	0.0125514
Gm32036	973	0.102168	0.286035	0.0047544	0.00164724
Gm4117	977	0.105034	0.293069	0.00786061	-0.00392178
Tango6	977	0.186404	0.464537	0.00475141	0.00934344
Klf4	978	0.105411	0.293872	0.030238	-0.00278436
Ppwd1	978	0.188589	0.469628	0.00271375	0.013941
Tmem86a	979	0.106141	0.295661	0.0137266	0.00374805
Whamm	979	0.188895	0.470037	0.00810557	0.016581
Ice2	980	0.107317	0.298685	0.00625823	0.00266767
Il17re	980	0.0946875	0.269189	0.0235121	0.0279129
Oasl2	981	0.108084	0.300566	0.0287359	-0.00114066
Tecpr1	981	0.189722	0.471448	0.00522673	0.0129375
Bmyc	982	0.108809	0.302076	0.0158814	0.00893712
Timp1	982	0.189746	0.471448	-0.0650753	0.0168546
Ubn2	983	0.109394	0.303445	0.0244243	0.0179008
Cryba4	983	0.190784	0.473316	-0.00753965	0.002949
Fam46a	984	0.110269	0.305106	0.0145489	0.00671374
Slc25a29	984	0.123735	0.333721	0.00598828	0.00881991
Parp12	986	0.112849	0.310944	0.0183439	-0.00649974
Ugp2	987	0.113045	0.310967	0.0277488	-0.0205214
Vwc2	987	0.195784	0.483548	-0.00444307	0.00255723
Vwa1	988	0.113549	0.311835	0.0240869	-0.0338208
Hsph1	988	0.196627	0.485268	-0.0911656	0.0231776
Zfp251	989	0.111288	0.30741	0.00578913	0.00505829
Npr2	989	0.197689	0.487526	-0.00345336	0.00303168
Cdkl3	990	0.164186	0.420885	0.00387463	0.00504895
Exoc1	991	0.104525	0.291894	0.0167648	0.0157688
Ing2	991	0.198287	0.488635	-0.00101732	0.0197976
Tanc2	992	0.115457	0.316508	0.0367683	-0.00445196
Lgr6	992	0.19864	0.48912	-0.0101707	0.0148953
Xaf1	993	0.115619	0.316508	0.0311076	-0.0220594
Perp	994	0.115632	0.316508	0.0414384	-0.246658
Bmp1	994	0.199078	0.489492	-0.00584935	0.00990291
Ak4	996	0.117396	0.32107	0.0082697	-0.00898098
Bbs4	996	0.201298	0.493851	-0.00381887	0.000504673
Gm26772	997	0.117822	0.321702	0.010527	0.00641382
3110079O15Rik	997	0.202317	0.495593	0.00342999	0.0116106
2310033P09Rik	998	0.111042	0.306986	0.0255168	0.0202134
Akap13	998	0.202337	0.495593	-0.0059557	0.0268258
Ddx46	999	0.119048	0.323932	0.0345491	0.00455543
Nisch	999	0.150545	0.392912	0.0174425	0.0247193
Hspg2	1000	0.119127	0.323932	0.0114652	-0.0265304
B4galt6	1000	0.205247	0.502051	-0.00881915	0.00503068
Higd1a	1001	0.119394	0.324245	0.0428863	-0.104329
Pdlim1	1001	0.205657	0.502684	-0.042611	0.0462541
Enho	1002	0.119438	0.324245	0.0059095	0.00188498
Tmem2	1002	0.206395	0.504115	-0.0407579	0.0147015
Krt16	1003	0.119635	0.324514	0.0153756	-0.0216341
Bcl2l11	1004	0.120648	0.326992	0.017647	0.0116075
Sectm1a	1004	0.132024	0.350933	0.0195893	0.0279691
Tceanc2	1006	0.122145	0.330509	0.0106998	0.000788745
Krt14	1006	0.170359	0.433356	0.0162571	0.0206088
Spef1	1007	0.213325	0.519508	-0.00105866	0.00527853
Nat8f2	1008	0.123283	0.333044	0.00658923	0.00351153
Gm35909	1008	0.215223	0.523747	0.0089786	0.0215024
Csrp1	1009	0.125382	0.337615	0.0575169	-0.636043
Tmem255b	1009	0.217084	0.527887	-0.0208736	0.00385611
Pds5a	1010	0.121679	0.329519	0.0246246	0.0231796
Terf2ip	1010	0.217257	0.527921	-0.000206732	0.0170203
Slc43a2	1011	0.108643	0.301867	0.00585155	0.0053261
Hcfc1r1	1013	0.128463	0.343916	0.0540403	-0.166338
Cadm1	1013	0.219151	0.531352	0.00454766	0.0198983
Slc5a6	1014	0.128761	0.343916	0.00657158	0.00258698
Angel2	1015	0.129279	0.345021	0.0185078	0.00220754
Dkc1	1015	0.221698	0.535959	-0.0140383	0.0182593
Rnf122	1017	0.1299	0.346401	0.0129164	-5.65563e-05
AA986860	1018	0.130442	0.347565	0.0196069	0.00027326
Dnajc25	1018	0.225209	0.543256	-0.0438736	0.0215135
Sdc1	1019	0.132182	0.350957	0.0517829	0.0178984
Szt2	1019	0.226444	0.545839	0.00280708	0.00506924
Gm32618	1020	0.133205	0.352941	0.00684478	0.000576787
Tanc1	1020	0.227755	0.548233	0.00158671	0.0169071
Mindy2	1021	0.134922	0.356827	0.023225	-0.029311
Rbm47	1021	0.227768	0.548233	-0.0444766	0.0233819
Zfp780b	1022	0.134995	0.356827	0.00620241	0.00589706
Gas2l3	1022	0.229099	0.551035	-0.000949716	0.00629755
Snhg6	1023	0.136804	0.361032	0.0294249	-0.0912093
Marf1	1024	0.137305	0.362065	0.0201637	0.00473884
Vat1	1025	0.141916	0.373036	0.0342781	-0.093826
Tnfrsf21	1025	0.233393	0.560144	0.00864436	0.0135186
Zfp764	1026	0.191983	0.474868	0.00502222	0.00807183
Slc25a43	1027	0.144606	0.379204	0.00955332	0.00760247
Tspo	1028	0.145953	0.382434	0.0507874	-0.152379
Rwdd3	1028	0.235206	0.563677	-0.00406146	0.00454706
Car12	1030	0.151452	0.394968	0.0264808	-0.0625054
Stac2	1031	0.151642	0.395153	0.00866824	0.00198301
Specc1	1031	0.239107	0.570076	-0.0583119	0.0259474
C530043A13Rik	1032	0.241087	0.574033	-0.0120144	0.0155578
Pxdc1	1033	0.153874	0.400338	0.0498079	-0.0990387
Slitrk4	1035	0.158167	0.409578	0.0104351	-0.0099589
Tbc1d24	1036	0.243705	0.57985	-0.019298	0.00582944
Klk1b11	1037	0.161739	0.417196	0.00920643	0.00654328
Zbp1	1037	0.244636	0.581648	0.000391711	0.0346499
Tsc22d2	1039	0.163173	0.419261	0.0217577	-0.000607587
Tac1	1039	0.2454	0.582612	-0.0198182	0.02112
Foxi1	1040	0.163857	0.420367	0.0130325	0.00697596
Rhoj	1040	0.246164	0.583603	-0.018493	0.0303075
Pfkp	1041	0.16436	0.421006	0.033988	-0.109598
Crem	1042	0.167469	0.427976	0.0238213	0.00135434
Cd47	1043	0.168591	0.429517	0.0317733	-0.026568
Phyh	1043	0.157713	0.40904	0.0099207	0.0118035
Sprr2a3	1044	0.170061	0.432931	0.00602494	0.000512979
Gbp2	1044	0.252248	0.595471	-0.0229885	0.0280254
Tsen15	1046	0.171218	0.435207	0.0156759	-0.00899575
Creb3l2	1046	0.237232	0.566893	0.00799352	0.0136512
Hspa9	1047	0.172088	0.437083	0.0425933	0.0347472
Nr4a1	1048	0.172568	0.43786	0.0198557	-0.0529342
Adamts5	1049	0.174097	0.441171	0.00876808	0.00431293
Gm29367	1049	0.255402	0.601202	-0.0143279	0.00263349
Plekhh2	1050	0.128039	0.34365	0.0131322	0.014973
Zfp707	1051	0.128729	0.343916	0.00694837	0.00537574
Gcc2	1052	0.175325	0.442926	0.020255	0.0140124
Ak2	1052	0.257596	0.604648	-0.0394577	0.0179238
Ggct	1053	0.177398	0.447158	0.019294	0.00645184
Tceal8	1053	0.25869	0.606356	-0.0212689	0.0254032
Ggh	1054	0.260465	0.608423	-0.00583585	0.0371442
Dhrs3	1055	0.26049	0.608423	-0.00154728	0.0123176
Zdhhc21	1056	0.181219	0.455038	0.0140719	-0.0046387
H2-DMb1	1056	0.262963	0.613334	-0.0329466	0.0269018
Smagp	1057	0.181884	0.456364	0.0457324	-0.121715
Vamp1	1057	0.263306	0.613702	0.000826617	0.00750292
4930522L14Rik	1058	0.132245	0.350957	0.00599955	0.00654738
Uba5	1059	0.182539	0.457355	0.0246738	-0.0345612
Zfp532	1059	0.237219	0.566893	0.00366784	0.00455893
Xrn1	1060	0.182948	0.457991	0.0175196	0.00378803
Numbl	1060	0.265665	0.618172	-0.0130036	0.00371495
Smco4	1061	0.183184	0.458238	0.0169101	0.0134667
Fbxw17	1062	0.184292	0.46066	0.0141114	0.000409427
Mras	1062	0.266741	0.619528	-0.0119179	0.0122304
Hivep3	1063	0.267364	0.620538	-0.0833447	0.023611
Akr1c13	1064	0.185769	0.463653	0.00526365	-0.00083827
Mgll	1064	0.270694	0.626949	-0.0107169	-0.000136489
Acp5	1065	0.186174	0.464314	0.0117045	0.000901906
Cttnbp2nl	1066	0.190211	0.472249	0.0308987	-0.0840153
Foxc1	1066	0.273198	0.632307	0.00156507	0.0177026
Zfp846	1067	0.191449	0.474611	0.00563803	-0.000408856
Pon2	1067	0.275357	0.636485	0.00588582	0.0369962
Slc6a14	1069	0.191842	0.474868	0.010931	-0.0196517
Gjb3	1070	0.191939	0.474868	0.0084394	0.000775522
Col25a1	1070	0.279514	0.644673	-0.0119679	0.0054795
9230102O04Rik	1071	0.193367	0.477933	0.0125152	0.00322088
Dnal1	1071	0.280299	0.64576	-0.00474829	0.00184072
Nipal2	1072	0.280375	0.64576	0.00831325	0.0281998
Liph	1073	0.198779	0.48912	0.018937	-0.066062
Cirbp	1073	0.281575	0.648072	-0.0012362	0.0183573
Vtcn1	1074	0.283023	0.6505	-0.0228673	0.0159731
Erich1	1075	0.19978	0.49049	0.0128198	-0.0228506
Txnrd2	1076	0.202457	0.495593	0.0191099	0.00158553
Raph1	1076	0.284556	0.65357	-0.0281516	0.0303327
Aqp3	1077	0.285041	0.65423	0.000568763	0.00627617
Fat1	1078	0.206878	0.504923	0.0198405	-0.0149734
Zcchc11	1079	0.209161	0.510119	0.0130579	0.0078392
Olfr920	1080	0.213237	0.519508	0.00612212	-0.00168397
AU020206	1080	0.286654	0.657478	-0.0178687	0.00445499
Agrn	1082	0.289525	0.662685	-0.0333132	0.0185312
Sptan1	1083	0.217988	0.529309	0.0258143	-0.0244523
Map3k2	1083	0.29313	0.668649	0.0018074	0.0177389
Ypel2	1084	0.219386	0.531533	0.00622219	-0.00907596
Rdx	1084	0.147054	0.384709	0.0300738	0.0311606
Tc2n	1086	0.220399	0.533207	0.0170368	-0.0061239
Gchfr	1086	0.296962	0.676902	-0.00078664	0.00775452
Lhfp	1087	0.222371	0.536802	0.0132726	0.00617704
Capsl	1088	0.303448	0.689788	-0.0343808	0.0121125
Kitl	1089	0.305345	0.693623	-0.0540683	0.0170256
Nek1	1090	0.30642	0.695589	-0.0318766	0.0107894
Tcf7l2	1091	0.230532	0.554079	0.0231029	-0.0219177
Whrn	1091	0.156106	0.405828	0.00860774	0.00800811
Syngr1	1092	0.233075	0.559787	0.0128167	-0.00363124
Pam	1092	0.313188	0.708523	-0.0750171	0.0207202
Inhba	1093	0.235658	0.564029	0.0154133	0.00169349
Rnf183	1094	0.235693	0.564029	0.0117548	0.00754811
Fam102a	1094	0.315733	0.713793	-0.038757	0.0181055
Ccl2	1096	0.221949	0.536174	0.017905	0.0136397
Srsf7	1096	0.317301	0.716848	-0.202937	0.0412509
Appl2	1097	0.238644	0.569854	0.0124928	-0.0580242
Peli1	1097	0.318821	0.719793	-0.00170429	0.0195316
Ifit1	1098	0.239021	0.570076	0.0221002	0.0170791
Prelp	1098	0.319498	0.720829	-0.00116406	0.00381168
Sun2	1099	0.239253	0.570076	0.0169964	-0.0397058
Plekhf1	1099	0.323187	0.72816	-0.100103	0.0168069
Tgfb3	1101	0.327524	0.734932	0.00764104	0.019859
Oat	1102	0.328143	0.73574	-0.0400715	0.0139235
Sc5d	1103	0.245275	0.582612	0.0128991	0.00446257
Cd59a	1103	0.328328	0.73574	-0.0262896	0.0181835
Marcksl1	1104	0.330279	0.73961	-0.229916	0.0438309
Paxbp1	1105	0.334186	0.746341	0.00614517	0.0104424
Nampt	1106	0.16852	0.429517	0.0152549	0.0185173
Tmem131l	1108	0.339805	0.757869	-0.0103056	0.0097974
Abca7	1109	0.24758	0.586541	0.00465447	-0.00220342
Irgq	1111	0.248894	0.588811	0.0236108	-0.0540636
Hsf2	1111	0.347824	0.773669	-0.0027297	0.00252626
Plod1	1112	0.25049	0.591876	0.0136801	-0.0618027
Dyrk3	1112	0.175223	0.442926	0.0163482	0.0169861
AC168977.2	1113	0.255654	0.601367	0.00547584	-0.00638246
Cep85l	1113	0.351283	0.779792	-0.000907729	0.00471289
Klhl25	1114	0.259516	0.607861	0.0160515	-0.0262011
Ppan	1114	0.351809	0.780436	-0.109664	0.0268206
Dhx30	1115	0.176731	0.446138	0.0155056	0.00845877
Ipmk	1116	0.259912	0.60836	0.0111539	0.00146174
Muc4	1116	0.354537	0.785437	-0.0915692	0.0141452
Nr4a2	1117	0.260266	0.608423	0.0121601	-0.00860152
Rubcn	1117	0.362929	0.800813	-0.00281282	0.0152603
Per3	1118	0.252485	0.595606	0.00513595	0.00718384
Tuft1	1119	0.261814	0.611084	0.0187188	-0.223893
Hist1h4h	1120	0.263842	0.614519	0.0166145	-0.149811
Hspa13	1121	0.365599	0.805097	-0.0457785	0.0131996
Sspn	1122	0.36946	0.81144	-0.00594306	0.00493244
Ppp1cc	1123	0.265971	0.618172	0.0306637	-0.0911914
Zfp704	1123	0.185264	0.462742	0.0127618	0.00624544
Gm13056	1124	0.268132	0.621885	0.0136961	-0.0311123
Hspa1b	1124	0.371551	0.815492	-0.124632	0.0178412
Socs5	1125	0.269113	0.623725	0.0252433	0.00985829
Aplp2	1126	0.374423	0.821251	-0.0869627	0.0400439
Tpst1	1127	0.375672	0.823444	-0.00257846	0.00350646
Cdkn2a	1128	0.275387	0.636485	0.0294211	-0.0202713
Eif4e3	1129	0.378006	0.827465	-0.0053279	0.00811688
Tmem176a	1132	0.378745	0.828535	-0.214808	0.0320564
Klk11	1133	0.28781	0.659672	0.0119477	0.00810445
Caprin2	1133	0.379089	0.828741	-0.00364556	0.00597482
Pgs1	1134	0.288106	0.659893	0.0323693	-0.0236693
Glul	1135	0.382437	0.834407	-0.00165265	0.00534173
Nudt7	1136	0.29156	0.666424	0.00517999	0.00400305
Ppp1cb	1137	0.291816	0.666548	0.027775	-0.07324
Arhgap42	1137	0.386621	0.841319	-0.0276193	0.0116479
Ankrd10	1138	0.29314	0.668649	0.00772153	0.00331452
Hnrnph1	1138	0.387714	0.84259	-0.0570111	0.0300997
Strn	1139	0.199335	0.48976	0.00979129	0.00943589
Tor1aip2	1142	0.302896	0.689478	0.0241862	-0.150679
Tns4	1142	0.393039	0.851928	-0.0853588	0.0127241
Rtn2	1143	0.30318	0.689651	0.001336	-0.00849214
Bclaf1	1143	0.351249	0.779792	0.00801706	0.023642
Ltbp1	1144	0.395087	0.85469	-0.0274568	0.012067
Dennd5b	1146	0.252733	0.595766	0.00776886	0.00615537
Hexim1	1147	0.256076	0.601933	0.0117363	0.00907673
Lims1	1148	0.310571	0.703564	0.0231596	-0.055435
Large2	1149	0.290652	0.664805	0.00441241	0.00757911
Cd27	1152	0.320803	0.723281	0.00533386	-0.00326254
Furin	1154	0.324362	0.73009	0.0144706	-0.00818157
Fam109a	1155	0.324733	0.730154	0.0108703	0.000583265
Grasp	1155	0.405808	0.87401	-0.00930185	0.00624841
Fam102b	1156	0.325407	0.731173	0.00670326	-0.00555128
Plekhm1	1156	0.408986	0.880157	-0.0142037	0.00837364
Insr	1157	0.326089	0.732209	0.0095382	-0.00647005
Rbbp7	1158	0.414526	0.889766	-0.019935	0.0300596
Csrp2	1160	0.332529	0.744147	0.00820099	-0.0140596
Ankrd11	1161	0.333249	0.744751	0.0220864	-0.102254
Ift80	1162	0.4206	0.901052	-0.00806998	0.00326409
Kctd12	1163	0.42178	0.902995	-0.000914998	0.00781792
Ubd	1164	0.253011	0.595997	0.00537645	0.00348539
H2-DMa	1164	0.424275	0.90775	-0.000480212	0.0157245
Lamb2	1165	0.34145	0.760512	0.0150129	-0.0509123
Nos1ap	1165	0.425738	0.909705	-0.0238752	0.00825056
C1qtnf4	1166	0.341096	0.760236	0.00500228	0.000453618
Tmem37	1167	0.234775	0.563052	0.00806207	0.0101762
Arl5b	1168	0.345226	0.768407	0.0123657	-0.0234432
Apol6	1168	0.348487	0.774624	0.00273143	0.00531766
Hoxb3os	1171	0.24557	0.582612	0.00406809	0.00551778
Eid3	1172	0.432045	0.920214	-0.0177602	0.00459667
Bcl3	1173	0.354164	0.785136	0.0200708	0.00197646
Ociad2	1173	0.433337	0.922373	-0.0375144	0.020585
Tirap	1174	0.435068	0.925035	-0.0166879	0.0107223
Ajuba	1175	0.324484	0.73009	0.0136381	0.00336488
Smc3	1175	0.435819	0.925276	-0.00589894	0.0182238
Rdh13	1176	0.302606	0.689291	0.00682737	0.00509845
Trafd1	1177	0.311171	0.704441	0.0192402	0.0168396
Pbld1	1177	0.218875	0.531072	0.00462096	0.00354903
Chst7	1178	0.361244	0.79816	0.00554857	-0.000413457
Nhs	1178	0.440232	0.932257	-0.0232611	0.0079824
Nradd	1179	0.362324	0.800012	0.00182214	-0.00217384
Pik3ip1	1179	0.220182	0.533073	0.00954849	0.0111852
Cdkn2b	1181	0.365043	0.804407	0.0158306	-0.0361279
Tbl3	1181	0.445717	0.940862	-0.0498574	0.00714906
Arhgap6	1183	0.447162	0.942733	-0.00162815	0.00600436
Casc1	1184	0.366332	0.806174	0.000529972	-0.0144701
Desi1	1184	0.447172	0.942733	-0.0200984	0.0207002
Trip6	1186	0.367619	0.807932	0.0265074	-0.0485871
1200007C13Rik	1186	0.3854	0.839214	0.00379846	0.00617002
Rorc	1187	0.377445	0.826784	0.0109415	-0.00562016
Cldn10	1188	0.379559	0.829222	0.00401352	0.000384257
Ptprz1	1188	0.451798	0.948861	-0.0129406	0.00582087
Frmd4b	1189	0.380898	0.831597	0.0114801	-0.0304041
Slc6a6	1189	0.454451	0.952622	-0.0595647	0.0147959
Tmem150a	1190	0.457143	0.957657	-0.0228203	0.00698595
Rgs12	1191	0.457519	0.95784	-0.00308161	0.00419384
Lhfpl2	1193	0.468576	0.978537	-0.0114073	0.0126944
Gpr160	1194	0.390231	0.847506	0.0126187	-0.0330766
Irf2bp2	1194	0.468587	0.978537	-0.038116	0.0109764
Nudt12	1195	0.39132	0.849312	0.00481908	-0.00392279
Scn1b	1195	0.470315	0.981079	-0.0588708	0.0126836
Oasl1	1196	0.392402	0.851105	0.00778896	-0.0135238
Nop58	1196	0.470447	0.981079	-0.174027	0.0246535
Spice1	1197	0.394635	0.85427	0.0046227	-0.00298611
Piga	1199	0.474817	0.98781	-0.00135188	0.00406435
Ddx60	1200	0.400051	0.864297	0.00678685	-0.00757281
Trmt13	1200	0.476263	0.989425	-0.00173053	0.00872086
Unc13d	1201	0.400718	0.864797	0.00875837	-0.0120463
Gpr39	1201	0.476489	0.989425	-0.0156456	0.0018253
Igsf8	1202	0.400804	0.864797	0.0211234	-0.0631985
Mbd1	1203	0.404556	0.872323	0.0184205	-0.0372972
Ifi27	1205	0.481367	0.995808	-0.0816107	0.0243214
Tex30	1206	0.412595	0.886197	0.0138277	-0.0342412
Boc	1208	0.278573	0.643269	0.00567464	0.00372198
AC161165.6	1208	0.48365	0.999022	-0.00775583	0.00253507
Cetn4	1209	0.418279	0.89666	0.00808237	0.00199294
Slc16a1	1209	0.483892	0.999022	-0.0154246	0.00359055
Ivns1abp	1210	0.484127	0.999022	-0.00654652	0.0239054
Ghdc	1211	0.250546	0.591876	0.00708482	0.00886308
Slc1a1	1212	0.425446	0.909669	0.0115138	-0.0184826
Osgin2	1212	0.488556	1	-0.0297491	0.0109912
Ddx39	1213	0.426585	0.910927	0.0177533	-0.00879274
1110035H17Rik	1213	0.489202	1	0.000320366	0.0120851
Gm43672	1214	0.278711	0.643269	0.00520273	0.00478793
Znhit6	1215	0.490829	1	-0.0408815	0.0097717
Cavin3	1216	0.429917	0.916862	0.000990995	-0.00692658
Atp6v1b1	1216	0.492659	1	-0.10488	0.0187043
Pak1	1217	0.248231	0.587664	0.0196048	0.0214166
Tnfrsf1a	1218	0.430912	0.918391	0.0189126	-0.00943409
P2rx4	1218	0.258606	0.606356	0.0130409	0.0287537
Gprc5c	1219	0.435146	0.925035	0.0149854	-0.081537
Dapk1	1220	0.435512	0.925218	0.00884694	-0.00194754
Sec24d	1220	0.358005	0.791529	0.00491812	0.00892861
Nrf1	1222	0.439448	0.931191	0.0129969	-0.00828552
Ifngr1	1222	0.496972	1	-0.103398	0.0177549
Metrnl	1223	0.440621	0.932484	0.0163375	-0.0346213
Gm10399	1223	0.265861	0.618172	0.00292945	0.00466409
Riox2	1224	0.364195	0.803072	0.00673289	0.00283253
Rai2	1224	0.498447	1	-0.00662559	0.000376616
Slc5a8	1225	0.449604	0.946361	0.0140784	-0.00440992
Slc25a48	1226	0.257294	0.604368	0.00399657	0.00447499
Lmcd1	1226	0.500584	1	-0.0171564	0.008673
Nktr	1227	0.450486	0.946707	0.0191138	-0.0143369
Agbl3	1227	0.307464	0.69748	0.00324618	0.00461933
1700096K18Rik	1228	0.386924	0.841427	0.0045322	0.00250166
Mitf	1230	0.505986	1	-0.0030909	0.00327177
Slc38a2	1231	0.460093	0.96262	0.0220165	-0.0193942
Rrnad1	1232	0.507832	1	-0.00522406	0.00586752
Akap11	1234	0.460941	0.963785	0.00694851	-0.00484628
Gm42788	1236	0.473474	0.986256	0.00750776	0.000334678
Cytip	1236	0.514734	1	-0.013823	0.0110144
Itga2	1238	0.518266	1	-0.000749263	0.00156112
Oas1g	1239	0.474418	0.987601	0.00576899	4.07508e-05
Chil1	1239	0.519202	1	-0.626949	0.0594045
Zfp61	1240	0.51947	1	-0.00674795	-0.00140837
Gm13889	1241	0.520496	1	-0.100483	0.00834447
Mal	1242	0.281949	0.648482	0.00165553	0.00231016
Dph5	1243	0.437224	0.927072	0.00697109	0.000339794
Gse1	1244	0.479025	0.992822	0.00671738	-0.0286379
Ankrd28	1244	0.528716	1	-0.0408761	0.00882368
Sh3rf1	1245	0.480024	0.993674	0.00613316	-0.0168695
Dhx33	1245	0.530368	1	-0.00853329	0.00443006
Tmem154	1246	0.530471	1	-0.0116248	0.00305636
Ccdc88c	1247	0.484452	0.99907	0.00582375	-0.00762984
Pitpnc1	1247	0.532549	1	-0.0413896	0.0134379
Naaladl2	1248	0.485661	1	0.00573828	-0.00113531
Plekhh1	1249	0.485935	1	0.00599249	-0.00926461
Sftpd	1250	0.449581	0.946361	0.000809188	0.00467944
Angel1	1251	0.537244	1	-0.00140968	0.00278059
Timd2	1252	0.354875	0.78566	0.00462969	0.00386051
Mup5	1253	0.49618	1	0.00520193	-0.0130806
Saa1	1253	0.540487	1	-0.0266084	0.0160659
Pipox	1254	0.541656	1	-0.0148005	0.00115847
Hhipl2	1256	0.480036	0.993674	0.00362222	0.0202118
Ifi27l2a	1257	0.549981	1	-0.110727	-0.0127748
Prpf4	1258	0.308163	0.698588	0.00572536	0.00453853
Ptges	1258	0.551104	1	-0.0215032	0.003348
Slc17a5	1259	0.508338	1	0.00639594	-0.014903
Gm48395	1260	0.551647	1	-0.00710765	0.00802183
Gclm	1261	0.511284	1	0.0172035	-0.0051803
Pxylp1	1262	0.515595	1	0.00330789	-0.0125909
Pign	1262	0.553584	1	-0.00827359	0.00649361
Reps2	1263	0.556242	1	-0.00863145	0.00550726
Gm26782	1265	0.490171	1	0.00381236	0.000837213
Srsf6	1266	0.561286	1	-0.118103	0.0206662
Utrn	1267	0.527459	1	0.00784821	-0.0230508
Ndufaf4	1267	0.561485	1	-0.0244639	0.0199113
Cgn	1268	0.528035	1	0.0109899	-0.0246277
Anxa9	1268	0.564511	1	-0.00516039	0.00327063
Pnisr	1269	0.527901	1	0.00343321	0.0208624
Slc22a4	1270	0.452862	0.950455	0.00431264	0.00111883
Tnfaip8	1270	0.565716	1	-0.0683459	0.00800835
Serpinc1	1271	0.494981	1	0.000734323	0.0025288
Thap12	1272	0.428743	0.914946	0.0082886	0.00535176
Akap9	1273	0.537072	1	0.0146341	-0.0492085
Usp35	1274	0.57058	1	-0.0107227	0.00214356
Zrsr1	1275	0.397148	0.858587	0.00267742	0.00629255
Rhpn2	1276	0.544077	1	0.008114	-0.0430027
Mak16	1276	0.573013	1	-0.0437105	0.0126348
Pltp	1277	0.573138	1	-0.00838368	0.00202
Card19	1278	0.546168	1	0.0276555	-0.109151
Pknox1	1278	0.4123	0.886138	0.00212428	0.00385473
Bcar3	1279	0.514896	1	0.00420244	0.000931594
Taok2	1279	0.576278	1	-0.01228	0.00639183
1700086O06Rik	1280	0.578055	1	-0.0143163	0.00809322
Entpd2	1281	0.38336	0.835871	0.00218125	0.00530705
Tob1	1282	0.554654	1	0.01448	-0.0699598
Rep15	1282	0.578365	1	-0.00567082	0.00171392
Gm31105	1283	0.56045	1	0.00379088	-0.0100544
Prrx2	1284	0.561914	1	-0.000794068	0.00296616
Tmem67	1285	0.58692	1	-0.00705606	0.00276503
Morc4	1286	0.571356	1	0.0108883	-0.0632186
Fam167a	1286	0.586939	1	-0.0769301	0.0103324
Rhoc	1287	0.574749	1	0.0209167	-0.208268
Sesn1	1287	0.587895	1	-0.00240106	0.00309211
Erf	1289	0.57721	1	0.0129469	-0.116104
P2ry6	1289	0.588066	1	-0.0331142	0.00165364
Ift122	1290	0.578094	1	0.00197189	-0.00113165
Isg15	1290	0.589489	1	-0.0907755	0.0224078
Fam46b	1291	0.43711	0.927072	0.00104197	0.0021454
Chst11	1292	0.590473	1	-0.018027	0.00417238
Ncbp3	1293	0.582828	1	0.00551312	-0.0328886
Map3k5	1293	0.593723	1	-0.0184473	0.00617598
Zbtb38	1294	0.584663	1	0.0121657	-0.0234877
Ankrd61	1294	0.598389	1	-0.0036156	0.00289174
Brd2	1295	0.589821	1	0.01582	-0.0174245
Usp18	1296	0.594687	1	-6.77725e-05	-0.0516588
Ddx52	1297	0.595406	1	0.00712052	-0.00285719
Nudt4	1298	0.608126	1	-0.257459	0.0255623
Ube2r2	1299	0.416368	0.893142	0.00644282	0.0105566
Fdft1	1300	0.608442	1	0.00702152	-0.0275117
2510017J16Rik	1300	0.608921	1	-0.00349053	0.00140043
Zfp948	1302	0.610597	1	0.00367789	-0.0112316
Postn	1302	0.611471	1	-0.0405358	0.00264122
Cd109	1304	0.612916	1	-0.00546963	0.00466547
Apol9b	1305	0.617795	1	0.00778011	-0.0321419
Asb16	1306	0.442175	0.935175	0.00234438	0.000832287
Zfp629	1307	0.617987	1	-0.00388199	0.00419603
Mfap3l	1307	0.621766	1	0.00594395	-0.022796
Plp2	1308	0.622708	1	0.0184106	-0.0252713
Rnf19a	1309	0.624399	1	0.00904138	-0.0645192
Pde4d	1311	0.622571	1	-0.0202193	0.0144972
Fam213b	1311	0.640405	1	0.00802029	-0.00553047
Tns3	1312	0.35569	0.786937	0.00529374	0.00637861
Ccdc68	1312	0.500753	1	0.00490567	0.00185826
Lamc1	1313	0.411882	0.885813	0.00812442	0.00806012
Unc93b1	1314	0.648126	1	0.00195757	-0.00362209
Pla2g7	1315	0.629485	1	-0.00957364	0.0035405
Wdyhv1	1315	0.522404	1	0.00378015	-0.000337822
Pspc1	1316	0.630178	1	-0.0196612	0.00938129
Ulk3	1316	0.574452	1	0.00236334	-0.0014903
Rhod	1317	0.6532	1	0.00967192	-0.05948
Baz2b	1318	0.476118	0.989425	0.00124078	0.0107635
Nxt2	1318	0.477047	0.989963	0.00481946	0.00183988
Serinc3	1319	0.641934	1	-0.152861	0.0146619
Rbm43	1319	0.483054	0.998674	0.00301189	0.000472888
Nav2	1321	0.643807	1	-0.206758	0.0178628
Guca1a	1321	0.659298	1	0.00686328	-0.0174281
Slc48a1	1322	0.646166	1	-0.00299639	0.0115507
Gng11	1322	0.650104	1	0.00769272	-0.005931
Tom1l2	1323	0.334811	0.747232	0.00343792	8.93771e-05
Taz	1324	0.648907	1	-0.00738364	0.0124651
Ifit3b	1324	0.663068	1	0.00409747	-0.0151904
1810062O18Rik	1325	0.664793	1	0.00167541	-0.00642138
Mylip	1327	0.650803	1	-0.0074743	0.00506361
Uhrf2	1327	0.619402	1	0.013198	-0.0061013
Ctsh	1328	0.332954	0.744594	0.0176609	0.0283721
Ksr1	1329	0.655302	1	-0.00391103	0.00203229
Plekha5	1329	0.677428	1	0.00595818	-0.0163819
Hsd11b1	1330	0.655347	1	-0.00459736	0.00308217
Scgb1c1	1330	0.680685	1	0.003267	-0.0245194
Cenpc1	1331	0.366639	0.806315	0.0040828	0.00731826
Gm14698	1331	0.681886	1	0.0024096	-0.00296247
Fermt1	1332	0.664276	1	-0.0259178	0.0039458
Pla2g4a	1333	0.66754	1	-0.104047	0.00852786
Rem2	1333	0.683684	1	0.00619652	-0.0627787
Ctsz	1334	0.470693	0.981079	0.0175993	0.0156626
Mindy4	1335	0.671587	1	-0.00781641	0.00204421
Gm26877	1335	0.692914	1	0.00420614	-0.013394
Smim27	1336	0.671929	1	-0.012613	0.0047791
Spata7	1337	0.585866	1	0.0124454	-0.00676792
Fbln5	1339	0.677108	1	-0.138095	0.0161971
Bbs2	1340	0.591653	1	-0.000645671	0.00199014
Smg9	1342	0.579054	1	-0.00331267	0.00544201
Pdlim2	1342	0.649734	1	0.00881197	-0.00633712
Jmjd1c	1343	0.688135	1	-0.0745026	0.015466
Dcxr	1344	0.689057	1	-0.237908	0.0168187
Mcmbp	1345	0.71157	1	0.00198554	-0.0501052
Gm15261	1346	0.384394	0.837575	-0.000312375	0.000105818
Spsb1	1347	0.692871	1	-0.0180464	0.00375394
Uaca	1347	0.514203	1	0.0063651	-0.00207963
Zbtb1	1348	0.693407	1	-0.019812	0.00671732
Rell1	1349	0.721657	1	0.00657352	-0.0484144
P4ha2	1350	0.722645	1	0.00185283	-0.020698
Rps6kb1	1352	0.697072	1	-0.00962053	0.00452792
Polr3f	1353	0.697351	1	-0.00669447	0.00469243
Arid5a	1353	0.60016	1	0.00495259	-0.00372316
Airn	1356	0.700316	1	-0.0312012	0.00557071
Atg9a	1356	0.643197	1	0.0039966	-0.00194939
Ubb	1357	0.701791	1	-0.406555	0.0296712
Tnrc6b	1357	0.74219	1	0.00432129	-0.0384785
Snai3	1358	0.517178	1	-0.00061544	0.00466805
Jcad	1358	0.394186	0.853856	0.00342412	0.00268213
Tpm2	1359	0.750831	1	0.00174556	-0.0112106
Gm26724	1360	0.717425	1	-0.00582053	0.0052747
AC125149.3	1360	0.751736	1	-0.00185839	-0.0103138
Ctsb	1361	0.718086	1	-0.218334	0.0253903
Ly6g6c	1361	0.757416	1	0.0014572	-0.00881939
Usp37	1362	0.756566	1	0.00207361	-0.00948144
Zc3h13	1363	0.766159	1	0.00489071	-0.0560179
AC130815.2	1364	0.60068	1	-0.00150992	0.00246566
Fn1	1365	0.732409	1	-0.00374734	0.00287014
Fut8	1366	0.59257	1	-0.000439669	0.00739731
Tnc	1366	0.755955	1	0.000230149	-0.00724052
Trpv4	1367	0.735261	1	-0.00488249	0.00130155
Camk2d	1368	0.742127	1	-0.0336199	0.00348267
4930523C07Rik	1368	0.770802	1	0.00256069	-0.0125876
Cmtr1	1369	0.665556	1	0.00128264	-0.00249312
Ccl5	1372	0.626374	1	0.0085809	0.0028014
Ssbp3	1373	0.746517	1	-0.0248598	0.00296131
Son	1374	0.746692	1	-0.117245	0.00291263
Eml4	1375	0.56899	1	-0.00108374	0.00417766
6430548M08Rik	1375	0.782609	1	0.00259563	-0.0241271
Pcnt	1376	0.747315	1	-0.00687598	0.00409202
Cmtm3	1376	0.785325	1	0.00154561	-0.0122468
Zfp703	1377	0.786425	1	0.00960745	-0.0482522
Tox4	1378	0.750096	1	-0.074361	0.0060211
Hagh	1379	0.605836	1	-0.00224177	0.0146433
Parp14	1379	0.676129	1	0.00341139	-0.0068637
Col12a1	1380	0.753938	1	-0.0228891	0.00159733
Phldb3	1380	0.787978	1	-0.000883156	-0.0485774
Casp4	1381	0.754826	1	-0.026704	0.00583176
Rab27b	1381	0.753735	1	0.00359518	-0.00927378
Aplp1	1382	0.587452	1	0.00562819	-0.00517218
Gm8797	1383	0.757407	1	-0.384534	0.020506
Cngb1	1383	0.405866	0.87401	0.00080035	0.00315977
Cd14	1384	0.760477	1	-0.532572	0.0160578
Fhad1	1385	0.793183	1	0.00276319	-0.0116376
Bok	1386	0.565989	1	-0.000615392	0.0010561
Zbtb5	1387	0.604958	1	0.00102007	-0.00141285
Apbb2	1388	0.771474	1	-0.0699856	0.00622881
Rab17	1388	0.795229	1	0.00379386	-0.0416002
Oaf	1389	0.691948	1	-0.000601165	-0.00223354
Arglu1	1390	0.504993	1	-0.00453625	0.00476123
Gpr137b	1390	0.80232	1	0.00179083	-0.0252881
Smim22	1391	0.676764	1	0.00625316	-0.0156919
Lamb3	1392	0.774156	1	-0.0712771	0.00684454
Oas2	1392	0.577109	1	0.0021309	-0.00203723
Snhg12	1393	0.780153	1	-0.0155579	0.00313181
Egr2	1393	0.806355	1	0.00131645	-0.0247181
Klk1b1	1394	0.78654	1	-0.0374485	0.00167525
Scaf11	1394	0.521401	1	0.004124	-0.00587613
Gls	1395	0.787306	1	-0.0359445	0.00171047
Inip	1397	0.788475	1	-0.0093361	0.00708171
Anpep	1398	0.704087	1	-0.00244586	0.0054168
Prss23	1399	0.789734	1	-0.10054	0.00577025
Gpc6	1400	0.795299	1	-0.0102909	0.00552249
Serpinf1	1401	0.800533	1	-0.0108509	0.00137127
Homer1	1401	0.821318	1	0.0025583	-0.0178434
Slfn2	1402	0.801327	1	-0.0192526	0.00654162
Phldb2	1402	0.647584	1	0.00118475	-0.0032106
Flnb	1403	0.823844	1	0.0069869	-0.248681
Shisa2	1404	0.45022	0.946707	0.00180099	0.00299561
Trp53i11	1405	0.728424	1	-0.00563464	0.00772426
Ccdc57	1405	0.792022	1	0.00254563	-0.00430548
Nav3	1406	0.809306	1	-0.0248624	0.00400638
4930402H24Rik	1407	0.810202	1	-0.0528261	0.00130092
Ppm1d	1407	0.830865	1	0.00213713	-0.0148424
Grb7	1409	0.834273	1	0.0030504	-0.0627684
Cklf	1410	0.44975	0.946361	0.00430155	7.5033e-05
Naf1	1411	0.724682	1	-0.00645446	0.00401895
Ptpn2	1412	0.489954	1	0.00218166	0.00436485
Ifih1	1412	0.840158	1	0.00207836	-0.0670255
Alpl	1413	0.821446	1	-0.191961	0.00402254
Kdm7a	1414	0.849245	1	0.00249145	-0.0358974
Irf9	1415	0.850265	1	0.000550536	-0.0203974
Clk1	1416	0.453131	0.950455	0.00306094	-0.00101847
Adat1	1416	0.752498	1	0.0017039	-0.00255802
Ptcra	1417	0.66525	1	0.000542524	-0.00309344
Adgrl2	1418	0.825293	1	-0.0470784	0.00543523
mt-Nd6	1419	0.444874	0.939683	0.00146478	0.00245177
Mturn	1419	0.868845	1	0.00156546	-0.0185701
Junos	1420	0.594284	1	-0.00074441	0.00259165
Nkd2	1420	0.870817	1	0.000479675	-0.0193067
Nmrk1	1421	0.524792	1	0.000408914	0.000326765
2010109A12Rik	1421	0.673814	1	-0.00741141	-0.00283438
Hpn	1422	0.826975	1	-0.0232665	0.0036999
Nhlrc3	1422	0.87397	1	0.0014638	-0.0142615
Fkbp14	1423	0.827206	1	-0.00886696	-0.000837622
Ckb	1424	0.827381	1	-0.0278261	0.00145191
Gm26632	1424	0.58257	1	0.0012866	0.000787048
Mctp2	1425	0.602755	1	0.00063985	-0.00157421
Ldlrap1	1426	0.88333	1	6.49044e-05	-0.0636533
Scai	1427	0.477629	0.990549	-0.000131381	5.22246e-05
Tsga10	1427	0.612485	1	0.000615063	-0.0015595
Klf2	1428	0.884853	1	0.00214782	-0.0393311
Npy	1429	0.83996	1	-0.0477822	0.000688527
Psapl1	1429	0.44273	0.93575	0.00362859	0.00393394
Ddx21	1431	0.8428	1	-0.120291	0.00710696
Lipa	1432	0.843691	1	-0.141057	0.00668941
Cdv3	1432	0.892938	1	0.00521831	-0.0745793
1500015O10Rik	1434	0.846807	1	-1.17421	0.0122209
Trak1	1434	0.803518	1	0.00350275	-0.0103675
Myo1b	1435	0.682935	1	-0.011619	-0.000766979
Klk8	1436	0.899467	1	0.00429172	-0.0565789
Srek1	1437	0.824878	1	-0.0147652	0.00543145
Gja1	1439	0.777214	1	-0.0104056	0.00293752
Pan3	1439	0.901078	1	0.00324761	-0.0245595
Gm15728	1440	0.856602	1	-0.00572242	0.00220741
Map2k3os	1443	0.863421	1	-0.028739	0.000597478
Gtf3c5	1444	0.865129	1	-0.0242163	0.00129166
Rsad2	1444	0.916784	1	0.0121829	-0.118575
Fmr1	1445	0.496582	1	0.000316301	0.00471951
Lyn	1446	0.869263	1	-0.0351073	0.00137298
Nub1	1446	0.928787	1	0.00163412	-0.0395647
Fxyd2	1447	0.824176	1	0.000961584	-0.0105576
Frat2	1448	0.943562	1	0.00152901	-0.0285374
Lrrc8a	1449	0.944851	1	0.00112134	-0.0418407
Samd12	1450	0.948111	1	0.00342296	-0.024155
Vmac	1451	0.611979	1	0.00367473	0.00107104
Cxcl16	1452	0.885337	1	-0.0651474	-0.00264349
Eda2r	1452	0.801489	1	0.00055963	-0.0100222
Il23a	1453	0.887192	1	-0.0238856	0.00139825
Fancg	1455	0.70682	1	-0.00262004	1.61943e-05
AC168977.1	1455	0.645044	1	-0.00375544	-0.00795766
Enah	1456	0.835507	1	0.00337461	-0.00569119
Spns3	1458	0.895034	1	-0.170935	0.00240878
Kdm3a	1458	0.96349	1	0.00168958	-0.0280231
Mdm4	1459	0.825158	1	-0.0153958	0.00363132
Tshz1	1459	0.967663	1	0.000437675	-0.027268
Gas1	1461	0.553811	1	-0.000730064	-0.000337646
Gm26670	1462	0.963867	1	-8.14341e-05	-0.011469
Far1	1463	0.899222	1	-0.133089	0.0070122
Sipa1l1	1464	0.975151	1	0.000241334	-0.0280285
St3gal4	1465	0.902396	1	-0.0149507	0.000804809
Osbpl3	1466	0.508502	1	-0.00177217	0.00276807
Nrip1	1467	0.904155	1	-0.0862797	0.00609802
AI413582	1469	0.976979	1	0.0021699	-0.0521953
Mphosph8	1470	0.906814	1	-0.0458246	0.0022763
9430038I01Rik	1470	0.845904	1	-0.00148917	-0.0195003
Tnks1bp1	1472	0.990369	1	0.00220395	-0.0615107
Fscn1	1473	0.684782	1	-0.00233442	0.00114785
Nudt8	1475	0.695739	1	-0.00182802	-0.00139639
Aifm2	1476	0.910172	1	-0.0148578	-0.000457115
Llgl2	1476	0.999994	1	-0.000570238	-0.129581
Ttc39b	1479	0.913078	1	-0.0968495	0.0030234
Frk	1479	0.506932	1	0.000611661	0.00384835
Gpd2	1480	0.914215	1	-0.131804	0.00206479
Gm26825	1481	0.63107	1	-0.00197782	-0.00245119
Nifk	1482	0.919313	1	-0.0881336	0.00555859
Igf2bp3	1482	0.699537	1	0.00139851	-0.00817906
Ptprk	1484	0.922323	1	-0.0347482	0.00524973
Cyb5d2	1484	0.923168	1	-0.000153434	-0.0108685
Ctsd	1485	0.92455	1	-0.42836	0.00933082
Rab31	1485	0.51194	1	0.00123893	0.00109327
Tnip3	1492	0.533891	1	-0.00136743	-0.000285102
Tcf4	1492	0.938901	1	-0.00090068	-0.023654
Uchl3	1493	0.937974	1	-0.169444	0.000278
Tuba8	1494	0.774783	1	-0.000274058	-0.00491457
Tapbp	1496	0.940284	1	-0.0980751	0.0058882
Robo1	1497	0.757258	1	0.00012679	-0.00398982
Ggnbp1	1499	0.614912	1	-0.0023717	-0.000112128
Secisbp2	1499	0.607829	1	-0.00107458	-0.00498029
Ttll5	1500	0.945785	1	-0.0362022	0.00255144
Mpzl2	1501	0.947586	1	-0.0511223	0.0017702
Rnd3	1501	0.979583	1	-0.00132888	-0.0465276
Fads3	1502	0.948832	1	-0.0315117	0.00751611
Itga2b	1503	0.866413	1	-0.00746389	0.00173028
Borcs6	1503	0.991383	1	0.000951903	-0.0406763
2900093K20Rik	1504	0.671005	1	-0.000224709	-0.00560985
Oas1a	1505	0.536871	1	-0.00306306	0.000588382
Nfkbie	1506	0.955373	1	-0.0123598	0.00021134
Fdx1	1507	0.534515	1	0.000110704	-0.00322472
Gk	1508	0.960958	1	-0.0412333	-0.0166524
Cdc42ep2	1508	0.536051	1	-0.000424259	-0.00237419
Itpr2	1509	0.953649	1	-0.0227922	-0.000791498
Dvl2	1510	0.902272	1	-0.00549893	0.000327595
Notch2	1512	0.876332	1	-0.00984938	-0.000708573
Usp53	1512	0.649264	1	-0.00119424	-0.00532864
A930015D03Rik	1513	0.863709	1	-0.000924471	-0.00905202
Gm15420	1514	0.784479	1	-0.00103788	-0.00333916
Extl3	1515	0.960807	1	-0.000930078	-0.0205466
Arsa	1516	0.64164	1	-0.000308	-0.00242981
Rev1	1517	0.979255	1	0.00117771	-0.0249664
Sh3bp2	1519	0.979586	1	-0.0597485	-0.000322177
Phlda3	1519	0.980477	1	-0.00333593	-0.0839132
Nabp1	1521	0.862438	1	-0.0221195	0.00157296
Cdk5r1	1521	0.871006	1	-0.00202331	-0.00388418
Ang5	1522	0.983872	1	-0.0579737	-0.000278138
Pdzk1ip1	1522	0.899501	1	-0.0011355	-0.0222856
Nrp1	1523	0.89039	1	-0.00548852	0.00140324
Ncald	1525	0.703423	1	-0.00053205	-0.00283405
Hexa	1526	0.986689	1	-0.036933	0.00395177
Terf1	1526	0.716715	1	-0.00171898	-0.00688088
Mid1	1527	0.942774	1	-0.0203073	-0.00612472
Insig2	1528	0.999055	1	-0.000901385	-0.0722103
Lbhd1	1529	0.594129	1	-0.0010415	0.000126336
C1qtnf12	1529	0.696433	1	-0.00274567	-0.0163551
Ythdc2	1530	0.814246	1	-0.0074481	-0.00401604
Ccdc138	1530	0.920026	1	-0.00119706	-0.0107551
Nsd3	1531	0.959901	1	-0.00246044	-0.0374265
Col18a1	1532	0.995852	1	-0.0168004	0.000357417
Smim15	1532	1	1	-0.00266659	-0.125552
Ang4	1533	0.998684	1	-0.071658	-0.000134621
Gfod2	1534	0.997113	1	-0.0425961	-0.00391202
Gm7967	1535	0.816104	1	-0.00148393	-0.00805671
Itga8	1536	0.836824	1	-0.00320673	-0.0140098
D7Ertd443e	1537	0.752799	1	-0.00652816	-0.000347864
Steap4	1538	1	1	-0.0626858	0.000943247
Gm13830	1539	0.577602	1	-0.00152165	-0.00928048
Slc35d1	1540	0.863087	1	-0.00103113	-0.00861009
Tgfb1	1541	0.999998	1	-0.0642361	-0.00416616
Gm17056	1542	0.869418	1	-0.000700314	-0.00704395
Nqo1	1543	0.996724	1	-0.0370067	-0.000146731
Id1	1544	0.951394	1	-0.0232009	-0.00060173
Crb3	1544	1	1	-0.00137261	-0.343347
Lipm	1545	0.988278	1	-0.00948002	-0.00652079
Dcp1b	1545	0.962763	1	-0.00095522	-0.0107315
Mical2	1546	0.684297	1	-0.00258548	-9.77598e-05
Yod1	1546	0.639138	1	-0.00202334	-0.00363706
Ldhd	1547	0.656817	1	0.00543387	-0.0122818
Rnf217	1551	0.670971	1	-0.00303684	-0.00251067
Kras	1553	0.999993	1	-0.00445299	-0.145306
1190002N15Rik	1554	0.94526	1	-0.00749453	-9.95446e-05
Plekhg5	1557	0.923026	1	-0.00599186	-0.00013899
Rtn1	1558	0.756501	1	-0.000137901	-0.00634697
Kdelr2	1559	0.822626	1	0.000313401	-0.0236475
Ubxn7	1560	0.980673	1	-0.00103527	-0.0261925
Ascc3	1561	0.982571	1	-0.00479198	-0.0483988
Chd4	1562	0.97152	1	-0.00864075	-0.0733809
Csf2ra	1563	0.62087	1	-0.00288417	0.000543972
Slc4a11	1563	0.839068	1	-0.00209734	-0.0105701
Lrig1	1564	0.998441	1	-0.0347556	0.000572776
Sp110	1564	0.686687	1	-0.00440883	-0.00671914
Smchd1	1565	0.638244	1	-0.00391434	0.00467587
S100a14	1565	0.999995	1	-0.0166851	-0.152193
Trf	1567	1	1	-0.567548	-0.000909764
Rcn1	1567	0.664609	1	-0.00206272	-0.005096
Wwc2	1568	0.999081	1	-0.00252247	-0.0766401
Msmo1	1570	0.710704	1	-0.00999981	0.000771957
Uck2	1571	0.740688	1	-0.0174805	-0.00335628
Dynap	1571	0.975446	1	-0.000851531	-0.0188413
Lad1	1572	0.733429	1	-0.00876562	-0.0303745
Rabep1	1574	0.80438	1	-0.00253803	-0.012419
Lcn2	1575	1	1	-0.653247	0.00495276
Wls	1576	0.999007	1	-0.0640782	0.000755846
Agfg2	1576	0.608086	1	-0.00184884	-0.00195791
Orai1	1577	0.948379	1	-0.0649196	-0.0216119
Ttc9	1577	0.999254	1	-0.00302554	-0.04562
Crlf2	1578	0.828691	1	-0.0145658	0.00127795
Celf4	1579	0.999993	1	-0.0682053	-0.00172336
Srcin1	1579	0.979842	1	-0.00102366	-0.0133681
Ankrd9	1580	0.750702	1	-0.00802671	-0.00190688
Atf5	1582	0.999996	1	-0.00778911	-0.150593
Ano6	1583	0.983189	1	-0.0351571	0.000858447
Mmp13	1584	0.78238	1	-0.00172875	-0.00358255
Pard6g	1585	0.755698	1	-0.00311045	-6.8949e-05
Ywhag	1585	1	1	-0.00288595	-0.274793
Cd82	1586	0.772179	1	-0.013074	-0.0250476
Tmem68	1588	0.951133	1	-0.0162216	-0.00128378
Rnf167	1588	0.998983	1	-0.00707412	-0.0746345
Asap1	1590	0.964467	1	-0.0325756	-0.00628213
Nceh1	1590	0.623289	1	-0.00255434	-0.00181557
Sema4a	1591	0.999546	1	-0.024043	-0.00374766
Rdh10	1591	0.861129	1	-0.00598779	-0.0245238
Urb1	1592	0.960139	1	-0.0115842	-0.00221258
Gpsm1	1593	0.999886	1	-0.0218685	0.000322066
Myo1c	1593	1	1	-0.00597187	-0.12543
Slco3a1	1594	1	1	-0.0864177	-0.000348003
Pecam1	1594	0.62826	1	-0.00125704	-0.0006524
[truncated: 1,313 more rows]

## Sheet: 3-cytoskeleton claudin high
	Top	p.value	FDR	logFC.1	logFC.2
Krt18	1	4.9887e-114	1.65226e-110	0.328698	0.96047
Actb	2	1.61432e-104	2.67332e-101	0.483696	0.959207
Actg1	2	2.46424e-91	2.72052e-88	0.696542	0.923859
Krt8	4	3.05667e-86	2.53093e-83	0.236456	0.817808
Klf6	5	1.44224e-81	9.55342e-79	0.582653	1.02601
Dstn	5	4.26675e-81	2.35524e-78	0.704599	1.05274
Cdkn1a	7	7.12505e-69	3.37117e-66	0.401267	0.896839
Fosl1	8	8.68798e-68	3.59682e-65	0.12251	0.798074
Cldn3	1	3.44537e-64	1.24547e-61	0.901693	0.333813
Map2k3	9	3.76049e-64	1.24547e-61	-0.190182	0.673796
Rassf1	10	3.76141e-62	1.13253e-59	0.442768	0.724346
Cyr61	11	7.94042e-61	2.19156e-58	-0.694637	1.2012
Ppp1r15a	12	9.29744e-61	2.3687e-58	-0.0828922	0.654639
Malat1	13	6.54893e-58	1.54929e-55	-0.145628	0.668207
Plaur	14	8.98882e-57	1.98473e-54	-0.201426	0.756461
Cldn4	3	5.66259e-52	1.17216e-49	1.25821	0.659661
Hbegf	15	3.27088e-51	6.37244e-49	-0.347074	0.874142
Krt7	16	1.63064e-49	3.00038e-47	0.154159	0.824498
Tuba1c	17	7.58656e-49	1.32246e-46	-0.342951	0.641593
Ndrg1	18	1.18396e-48	1.96064e-46	-0.0212635	0.713235
Sertad2	19	3.39401e-48	5.35285e-46	-0.0307195	0.524801
Actn1	20	1.17482e-47	1.76863e-45	0.292667	0.582086
F3	21	2.56946e-47	3.70003e-45	0.101919	0.925541
Ifi202b	22	3.9949e-47	5.51296e-45	-0.640509	0.775464
Anxa1	23	8.56364e-47	1.13451e-44	-0.07784	0.832973
Csrp1	4	3.10183e-45	3.95126e-43	0.694962	0.636043
Emp1	24	1.01981e-44	1.25096e-42	-0.252233	0.664748
Actr3	25	1.2008e-44	1.42037e-42	0.0938468	0.498988
Maff	26	1.42348e-42	1.62572e-40	-0.121869	0.595478
Zc3h12a	28	4.50627e-41	4.97493e-39	-0.173762	0.518028
Rbms1	29	5.47049e-41	5.8446e-39	0.0549939	0.485231
Ubald1	12	1.81205e-40	1.87548e-38	0.383855	0.465291
Smox	31	4.22794e-40	4.24331e-38	0.205266	0.576249
Pttg1ip	32	5.7545e-40	5.60556e-38	-0.48421	0.503439
Anxa5	33	2.31118e-39	2.18703e-37	-0.106759	0.477022
Bcl10	34	8.95576e-38	8.2393e-36	-0.154893	0.461382
Zyx	13	9.73317e-38	8.7125e-36	0.388045	0.46911
Errfi1	36	2.80443e-37	2.44428e-35	0.24982	0.676872
Ceacam1	37	6.28576e-37	5.33806e-35	0.373422	0.669353
Dusp5	38	7.27809e-37	6.02626e-35	0.0601246	0.691409
Prr13	39	1.08675e-36	8.77884e-35	0.07833	0.546162
Ctsl	41	2.55211e-35	1.96572e-33	-0.114302	0.527077
Sqstm1	40	2.54977e-35	1.96572e-33	-0.572403	0.535189
Slc2a1	42	7.05003e-35	5.30675e-33	-0.102868	0.569422
Cystm1	43	8.77073e-35	6.45526e-33	0.155984	0.480141
Klf5	39	1.10998e-34	7.99186e-33	0.326995	0.525154
Efhd2	45	1.40956e-34	9.93287e-33	-0.0390324	0.571675
Litaf	46	6.00845e-34	4.14583e-32	0.208675	0.46594
Ubald2	6	1.50152e-33	1.01491e-31	0.553677	0.290623
Ier5	47	2.96823e-33	1.96615e-31	-0.013903	0.564947
Junb	48	4.25155e-32	2.76101e-30	-0.0107765	0.619417
Tpm4	49	5.67953e-32	3.61742e-30	0.226337	0.412542
Aldoa	7	5.8002e-32	3.62458e-30	0.510776	0.433537
Lgals3	50	7.31388e-32	4.48584e-30	-0.753344	0.654423
Ccnl1	51	4.66899e-31	2.81158e-29	-0.0149988	0.41027
Lypd3	52	5.7789e-31	3.41781e-29	0.116052	0.492623
Ahnak	53	8.59267e-31	4.9928e-29	-0.151762	0.447318
Noct	54	1.62533e-30	9.28121e-29	0.160857	0.535847
Vps37b	55	6.92876e-30	3.8895e-28	-0.140009	0.416125
Ube2b	45	7.24823e-30	4.00102e-28	0.262847	0.396015
Ehd1	57	9.49707e-29	5.15644e-27	-0.220986	0.440158
Fam107b	58	1.53433e-28	8.19627e-27	-0.00505878	0.546632
Btg2	41	8.85135e-28	4.65328e-26	0.353895	0.507141
Tubb6	60	1.14491e-27	5.92492e-26	-0.398431	0.493662
Ifrd1	61	4.7745e-27	2.43279e-25	-0.0508876	0.506791
Pgk1	10	5.89744e-27	2.95944e-25	0.587519	0.209828
Vcl	62	7.43388e-27	3.67478e-25	0.105977	0.341421
Msn	63	1.7317e-26	8.43438e-25	-0.0324735	0.367106
Cldn1	11	2.75634e-26	1.32304e-24	0.466189	0.263556
Pim1	64	5.48495e-26	2.59517e-24	-0.0936651	0.3456
Denr	65	7.09709e-26	3.31064e-24	0.0333203	0.451054
Pdlim5	66	1.77945e-25	8.18549e-24	0.150571	0.365018
Lrrfip1	67	2.26002e-25	1.02537e-23	0.0108451	0.393561
Psmd8	68	3.33121e-25	1.49094e-23	-0.0622054	0.381103
Epha2	69	3.80934e-25	1.6822e-23	-0.00832978	0.287811
Rab11a	70	3.17805e-24	1.38496e-22	0.163873	0.343512
Wipi2	71	3.90176e-24	1.67826e-22	-0.0303199	0.297633
Vasp	50	6.15723e-24	2.61445e-22	0.284786	0.38245
Eif4ebp1	15	1.83898e-23	7.70977e-22	0.41872	-0.175115
Palld	74	2.08247e-23	8.62141e-22	-0.00505307	0.329383
Tpi1	16	6.77462e-23	2.73628e-21	0.419296	-0.0549392
Myh9	75	6.76029e-23	2.73628e-21	0.179119	0.345699
Ppp1r2	76	9.4061e-23	3.75338e-21	-0.119037	0.400912
Tmem59	77	1.75029e-22	6.90114e-21	-0.137477	0.323208
Ifi203	78	1.81325e-22	7.06526e-21	-0.254057	0.473427
Wdr1	79	2.0632e-22	7.94571e-21	0.146664	0.318237
Gch1	80	3.663e-22	1.39447e-20	-0.256698	0.357105
Sat1	17	4.73258e-22	1.78117e-20	0.525601	-0.0120035
Map1lc3a	28	9.96756e-22	3.70927e-20	0.318167	0.358798
Smtn	82	1.03191e-21	3.79742e-20	-0.0422208	0.259305
Map7d1	83	1.5156e-21	5.51613e-20	0.0704042	0.336153
F11r	84	1.75111e-21	6.30399e-20	0.0922066	0.297704
Oser1	85	2.29146e-21	8.16055e-20	0.09778	0.285453
Tagln2	18	3.85175e-21	1.35713e-19	0.495635	-0.00122983
Wwtr1	86	1.23427e-20	4.30307e-19	-0.0896497	0.309496
Mafk	87	1.70959e-20	5.89809e-19	-0.0531442	0.221725
Bnip3l	56	2.20796e-20	7.53893e-19	0.259172	0.347268
Erbb3	19	2.25456e-20	7.61949e-19	0.252658	0.145851
Crb3	27	4.29249e-20	1.43603e-18	0.346762	0.343347
Rela	90	4.92849e-20	1.63232e-18	0.0746758	0.29993
Plet1	91	6.89197e-20	2.26002e-18	-0.47269	0.560021
Tm4sf1	92	7.02762e-20	2.28191e-18	-0.598411	0.605019
Myo1e	93	9.66421e-20	3.10756e-18	0.0711602	0.321607
Ypel3	40	1.78155e-19	5.67354e-18	0.21676	0.2542
Kdm5b	95	2.07004e-19	6.5295e-18	0.10431	0.276733
Tuft1	20	2.58219e-19	8.06813e-18	0.236495	0.223893
2610528A11Rik	21	2.71888e-19	8.41584e-18	0.492089	0.298715
Fblim1	22	3.32033e-19	1.01823e-17	0.273142	0.108862
Chic2	96	5.44705e-19	1.6551e-17	0.109414	0.291325
Gpi1	24	7.63303e-19	2.29824e-17	0.357013	0.093767
Eno1	25	9.32546e-19	2.78252e-17	0.42753	-0.202507
Pip5k1a	97	1.16724e-18	3.4517e-17	0.073272	0.257414
Ndfip2	98	1.75595e-18	5.14663e-17	-0.114873	0.303954
Atg101	100	2.61718e-18	7.6036e-17	0.12973	0.267348
Hcar2	101	4.00705e-18	1.15403e-16	0.0725387	0.214121
Cd44	102	4.28823e-18	1.22436e-16	-0.308249	0.303495
Cald1	26	4.42031e-18	1.25129e-16	0.387227	0.255706
Lmna	103	4.64601e-18	1.30403e-16	-0.441426	0.371613
Srsf5	104	8.15004e-18	2.26831e-16	-0.0135722	0.31694
Ets1	105	1.14628e-17	3.16372e-16	-0.210996	0.194213
Itm2b	106	4.76122e-17	1.30324e-15	-0.784608	0.346148
Mndal	107	5.97728e-17	1.62268e-15	-0.104438	0.272609
Tacstd2	108	9.16531e-17	2.46793e-15	-0.012532	0.455678
Lao1	29	1.22316e-16	3.26701e-15	0.319833	-0.234465
Cstb	109	1.39492e-16	3.69599e-15	-0.0880707	0.330807
Fam162a	30	1.75089e-16	4.60235e-15	0.391572	0.0183811
Csnk1e	110	1.90833e-16	4.97668e-15	0.0995673	0.263932
Sdc4	111	2.02497e-16	5.23962e-15	-0.173619	0.282491
Nfkbiz	112	2.22748e-16	5.71893e-15	0.0329758	0.293402
Coq10b	113	2.67612e-16	6.81794e-15	0.0289342	0.261623
Sfn	114	3.52615e-16	8.91497e-15	-0.144377	0.493915
Tjp2	115	3.68052e-16	9.23476e-15	0.120874	0.271848
Rab11fip1	116	4.04348e-16	1.00692e-14	0.0635956	0.228128
Eif1a	117	4.22753e-16	1.04489e-14	0.0519506	0.273074
Nfkbia	118	5.99984e-16	1.47196e-14	-0.482682	0.481822
Elf3	119	7.56792e-16	1.84301e-14	-0.15917	0.214549
Perp	31	8.16633e-16	1.97423e-14	0.296955	0.246658
Fam213a	32	9.01261e-16	2.16303e-14	0.245868	-0.0876906
Rhob	33	9.5615e-16	2.27825e-14	0.353808	0.189998
Glrx	120	9.86934e-16	2.3348e-14	0.225675	0.464069
Sgms2	121	1.0437e-15	2.45157e-14	-0.227481	0.278393
Cnn2	122	1.80519e-15	4.21041e-14	0.117745	0.204027
Fgfr1	124	3.0545e-15	7.07447e-14	-0.124755	0.236575
Bsg	125	3.80307e-15	8.74706e-14	-0.126723	0.412293
Csrnp1	126	4.03895e-15	9.22552e-14	-0.0189018	0.189048
Klf9	127	9.54191e-15	2.16458e-13	0.132603	0.226777
Cdh1	128	9.63389e-15	2.17058e-13	0.0569199	0.264082
Atp6v1b2	129	1.17499e-14	2.62944e-13	-0.0240532	0.218159
Srf	130	1.21853e-14	2.70856e-13	0.098041	0.163767
Top1	131	1.41407e-14	3.12227e-13	-0.410995	0.31264
Fermt2	90	1.72017e-14	3.77298e-13	0.198727	0.277529
Lamp2	133	1.74962e-14	3.81233e-13	-0.103947	0.218652
Dmkn	35	1.77106e-14	3.83382e-13	0.302045	-0.0387367
Flnb	38	2.38477e-14	5.1288e-13	0.268414	0.248681
Ywhag	43	2.4125e-14	5.15497e-13	0.275555	0.274793
Ctdsp2	36	2.55237e-14	5.41888e-13	0.201081	0.145187
Piezo1	135	2.72365e-14	5.74569e-13	-0.0700925	0.217731
Car9	135	3.05225e-14	6.39814e-13	0.149353	0.233256
Vasn	137	3.10746e-14	6.4729e-13	-0.18756	0.182137
Fam214b	138	4.29175e-14	8.88393e-13	0.0032256	0.192851
Npc2	37	4.50268e-14	9.26265e-13	0.2913	0.149265
Zbtb7a	140	4.85375e-14	9.92322e-13	0.117667	0.255905
H2-Q4	141	6.05978e-14	1.23129e-12	0.0584695	0.272889
Hmox1	142	6.54948e-14	1.32268e-12	-0.0933735	0.399554
Atp6v1e1	143	7.1816e-14	1.44154e-12	0.130503	0.263424
Pnp	144	9.70651e-14	1.93662e-12	0.00323282	0.190247
Tgoln1	145	1.63749e-13	3.24752e-12	0.0780008	0.212014
Sertad1	146	1.7054e-13	3.36207e-12	0.0402691	0.220875
Map3k8	147	1.76098e-13	3.45111e-12	-0.00745307	0.165076
Selenop	148	1.98924e-13	3.87551e-12	0.0171689	0.242376
Pafah1b3	42	2.2953e-13	4.44564e-12	0.23579	-0.0557479
Gadd45b	149	2.78013e-13	5.35338e-12	-0.146151	0.219649
Ocln	150	2.9474e-13	5.64266e-12	0.0419398	0.188276
Itpkc	151	3.32498e-13	6.32893e-12	0.0305689	0.201537
Gabarapl1	152	3.47276e-13	6.57245e-12	-0.0157654	0.199929
Plk2	153	3.59539e-13	6.76587e-12	0.10813	0.265514
Elf1	154	3.86949e-13	7.24054e-12	0.0723695	0.218067
Slc35e4	155	4.21625e-13	7.84507e-12	-0.373304	0.250838
Pard6b	156	5.98123e-13	1.10669e-11	0.0971212	0.176168
Tpst2	157	6.26254e-13	1.15231e-11	-0.198135	0.226033
Ubc	158	7.20686e-13	1.31874e-11	-0.247564	0.354856
Txnip	44	7.7002e-13	1.40127e-11	0.170543	-0.0510327
Areg	47	9.98253e-13	1.80667e-11	0.408288	0.131517
Nfkb1	159	1.05947e-12	1.90705e-11	-0.0989272	0.227956
Tprgl	93	1.20349e-12	2.15458e-11	0.180206	0.225294
Mif	48	1.31564e-12	2.3427e-11	0.365762	-0.115474
Arid4b	161	1.36228e-12	2.41277e-11	0.078844	0.210313
Lalba	49	2.45194e-12	4.31959e-11	0.460463	-0.825284
Gm14137	162	2.8435e-12	4.9829e-11	-0.082758	0.155544
Samd4b	164	3.48694e-12	6.07829e-11	0.047663	0.204543
Sbds	165	3.56285e-12	6.17809e-11	0.142143	0.219055
Klf13	123	3.95151e-12	6.81636e-11	0.194503	0.261701
Lysmd2	168	4.22015e-12	7.20471e-11	0.0650755	0.218448
Fam129b	167	4.21865e-12	7.20471e-11	0.0435915	0.212015
Cggbp1	169	4.58085e-12	7.7804e-11	0.0437033	0.217414
Rnf19b	170	4.63816e-12	7.83754e-11	-0.284513	0.245198
Ypel5	171	4.97127e-12	8.35778e-11	-0.00507355	0.175602
Sf3b1	172	5.31016e-12	8.88244e-11	0.119907	0.239525
Rhog	173	6.75496e-12	1.12424e-10	0.0622676	0.204039
Spag9	174	7.04507e-12	1.16666e-10	-0.0377104	0.2284
Sgk1	175	7.12959e-12	1.17479e-10	0.0133283	0.364823
Cbx4	52	8.36667e-12	1.3718e-10	0.113562	0.0331855
Relb	176	9.31992e-12	1.52057e-10	-0.0127005	0.183528
Tgif1	177	9.62908e-12	1.56331e-10	-0.0956384	0.280964
Sbno2	178	1.08898e-11	1.75936e-10	0.0231151	0.204739
Lif	179	1.26229e-11	2.02947e-10	-0.00396297	0.269353
Phf13	180	1.28894e-11	2.0623e-10	0.0834097	0.135819
Use1	181	1.34212e-11	2.13707e-10	0.0262869	0.223698
Eif4b	53	1.36512e-11	2.16329e-10	0.223943	0.0548646
Ralbp1	54	1.43937e-11	2.27009e-10	0.248803	0.0365196
Ppp2r2a	182	1.66453e-11	2.61275e-10	-0.0112207	0.177266
Hist1h2bc	55	1.84093e-11	2.87602e-10	0.34141	-0.151401
Cdca4	183	2.92497e-11	4.54813e-10	0.0447202	0.153817
Pgrmc1	184	2.95233e-11	4.56922e-10	0.0773354	0.220522
Mat2a	185	3.20019e-11	4.92979e-10	-0.24038	0.214044
Arl6ip5	186	3.22801e-11	4.94961e-10	-0.404267	0.240904
Ehd4	187	3.41068e-11	5.20561e-10	-0.136488	0.246622
Cdc42se1	57	3.88731e-11	5.90586e-10	0.254912	0.0110434
Rhbdf2	188	4.20618e-11	6.36113e-10	0.0955691	0.187111
Cldn7	189	4.25254e-11	6.40201e-10	0.123019	0.273102
Mcfd2	94	4.3102e-11	6.45945e-10	0.183845	0.219711
Atf3	58	6.16499e-11	9.19751e-10	0.285777	0.0261409
Ndel1	192	6.60614e-11	9.81146e-10	-0.0149574	0.205421
Slc20a1	59	6.73205e-11	9.90958e-10	0.254751	-0.0819642
Ifi204	193	6.7239e-11	9.90958e-10	-0.245157	0.144364
Ramp1	194	8.25219e-11	1.20935e-09	-0.344258	0.225503
Cyth2	195	9.25354e-11	1.35012e-09	-0.0944248	0.197412
Klf7	60	9.57435e-11	1.3908e-09	0.312135	0.291197
Stx6	196	1.00042e-10	1.4469e-09	-0.0225644	0.178927
Las1l	197	1.04084e-10	1.4988e-09	0.0347326	0.271493
Zfand2a	198	1.22281e-10	1.75323e-09	0.0299674	0.158258
Nectin2	147	1.46416e-10	2.09021e-09	0.170394	0.226807
Scarb1	178	1.55056e-10	2.20406e-09	0.113695	0.168138
Ero1l	202	1.68385e-10	2.3833e-09	0.13921	0.26194
2200002D01Rik	203	1.75133e-10	2.46826e-09	0.0533714	0.225609
Mob3a	204	1.96384e-10	2.75604e-09	0.0807347	0.131541
Isg20	205	2.19227e-10	3.06362e-09	0.0267328	0.145974
Rab8b	206	2.56106e-10	3.56397e-09	-0.0195489	0.114415
Hist1h1c	62	2.72901e-10	3.78179e-09	0.256726	-0.187148
Trip10	207	3.10507e-10	4.285e-09	0.0170885	0.158068
Zwint	208	3.22611e-10	4.43356e-09	0.089391	0.204079
Cd68	209	3.49456e-10	4.78264e-09	0.0234933	0.0997272
Baz1a	210	3.77093e-10	5.13963e-09	-0.132496	0.210675
Pdgfa	211	3.90229e-10	5.29689e-09	0.0904263	0.208403
Slc9a3r1	63	4.54412e-10	6.14291e-09	0.306841	0.118659
Ezr	212	4.62887e-10	6.23203e-09	-0.175621	0.259901
Arfgef3	64	5.16932e-10	6.9315e-09	0.105407	0.0644512
Rap2b	213	5.8406e-10	7.80002e-09	-0.0366952	0.214225
Rora	214	6.18778e-10	8.23049e-09	-0.0219339	0.121855
Ppp2ca	215	6.27654e-10	8.31516e-09	-0.103858	0.223514
Kpna4	216	6.98088e-10	9.21143e-09	-0.0927546	0.148457
H1f0	65	7.6055e-10	9.9958e-09	0.23296	-0.12473
Gadd45a	66	8.23183e-10	1.07762e-08	0.21311	0.121271
Stx3	218	8.91937e-10	1.16303e-08	0.0211344	0.193204
Baiap2	219	9.14243e-10	1.18744e-08	-0.211369	0.245661
Emp2	220	1.03065e-09	1.33341e-08	0.0949414	0.207549
Hist1h4h	67	1.06379e-09	1.36561e-08	0.147645	0.149811
Dot1l	221	1.06273e-09	1.36561e-08	0.0214519	0.166253
Ube2f	222	1.13853e-09	1.45591e-08	-0.228903	0.188661
Dnajb1	223	1.17367e-09	1.49508e-08	-0.157256	0.208846
Ckap4	224	1.19272e-09	1.51352e-08	-0.00937969	0.144091
Senp2	225	1.20671e-09	1.52543e-08	0.0152905	0.143502
Grina	226	1.2341e-09	1.55412e-08	0.00661166	0.178948
Zfp800	227	1.44787e-09	1.81642e-08	0.0100385	0.14898
Prkcd	228	1.56109e-09	1.95107e-08	0.0546842	0.16188
2310022B05Rik	192	1.70546e-09	2.12348e-08	0.087983	0.120647
Midn	230	1.73613e-09	2.15359e-08	0.0976244	0.177635
Triobp	217	1.86562e-09	2.30557e-08	0.103447	0.154876
Dusp1	232	1.87682e-09	2.31079e-08	-0.132513	0.221829
Arid4a	233	2.03468e-09	2.49588e-08	0.0677435	0.14594
Trappc6a	69	2.20326e-09	2.69269e-08	0.212574	0.00485
Ptprf	70	2.26323e-09	2.74572e-08	0.193957	0.0314605
Prkci	121	2.25659e-09	2.74572e-08	0.128201	0.143167
5330417C22Rik	236	2.37508e-09	2.8709e-08	0.0557193	0.129751
Nfat5	237	2.46789e-09	2.97223e-08	-0.0572896	0.13701
Iqgap1	239	2.68338e-09	3.22006e-08	0.0999411	0.218495
Espn	71	2.74186e-09	3.27835e-08	0.173912	0.110042
Cx3cl1	240	2.86605e-09	3.41452e-08	-0.118719	0.134292
Gdpd3	241	3.12167e-09	3.70573e-08	-0.0162889	0.213351
Spry2	242	3.20222e-09	3.78777e-08	-0.114398	0.141336
Mef2a	243	3.26598e-09	3.84944e-08	0.0824435	0.129974
Cxcl1	244	3.37764e-09	3.96692e-08	-0.26743	0.368729
Eif4a2	245	3.44658e-09	4.03359e-08	0.00625026	0.183588
Tiparp	246	3.64841e-09	4.25477e-08	-0.0604289	0.185103
Rras2	247	3.83028e-09	4.45119e-08	-0.0264848	0.191006
Klf16	248	3.86023e-09	4.4703e-08	0.0273188	0.114409
Pacsin3	249	4.04432e-09	4.66718e-08	0.0871963	0.191931
Bnip3	72	4.13396e-09	4.75405e-08	0.160812	0.129957
Tnf	250	4.26662e-09	4.88964e-08	-0.123143	0.118743
Sh3bgrl3	73	4.34136e-09	4.95814e-08	0.219795	-0.0823909
Ankrd22	74	5.72892e-09	6.52033e-08	0.134025	0.0689441
Lmbr1l	252	6.02891e-09	6.83827e-08	0.0271936	0.0880568
Rasa2	253	6.18135e-09	6.98725e-08	-0.0783371	0.120669
Pdlim7	254	6.52104e-09	7.34615e-08	0.0213051	0.19488
S100a10	255	6.98782e-09	7.84531e-08	-0.162947	0.240881
Cldnd1	256	7.11062e-09	7.95621e-08	-0.0747737	0.170821
Kdm6b	257	7.29768e-09	8.13802e-08	-0.0489289	0.140132
Wee1	75	7.56207e-09	8.40455e-08	0.120456	0.0742452
Rhoc	76	8.73681e-09	9.6777e-08	0.231701	0.208268
Rnf11	259	9.67383e-09	1.06799e-07	-0.0170652	0.183856
Galk1	78	9.9461e-09	1.08718e-07	0.210909	-0.309775
Tor1aip2	77	9.94321e-09	1.08718e-07	0.18618	0.150679
Cidea	144	9.92198e-09	1.08718e-07	0.0882147	0.106862
Map1b	79	1.06346e-08	1.15861e-07	0.260166	0.164677
Tbcc	261	1.22873e-08	1.33428e-07	0.0645085	0.254168
Atp6ap2	262	1.47955e-08	1.60139e-07	0.0408913	0.159137
Dusp8	80	1.49512e-08	1.61298e-07	0.119312	0.0525509
Anxa3	263	1.50704e-08	1.62055e-07	-0.161909	0.23753
Bbc3	81	1.76423e-08	1.89098e-07	0.14085	0.0685099
Irf2bpl	264	1.82304e-08	1.94771e-07	0.055705	0.164334
Sdc2	265	2.05305e-08	2.18639e-07	0.0570663	0.180236
Hbp1	266	2.13789e-08	2.26945e-07	0.0504955	0.162538
Btbd9	267	2.21463e-08	2.3434e-07	0.031737	0.120774
Hmga1b	268	2.43518e-08	2.56857e-07	0.00407653	0.093007
Rras	82	2.54026e-08	2.6709e-07	0.154323	0.0630508
Capn2	269	2.77355e-08	2.90696e-07	-0.021894	0.156999
Yrdc	270	2.89835e-08	3.02818e-07	-0.103752	0.150134
Rsrc2	271	2.96692e-08	3.09007e-07	-0.0602514	0.161972
Secisbp2l	83	3.1774e-08	3.29892e-07	0.136012	0.00125473
Ell2	258	3.22567e-08	3.33856e-07	0.118935	0.182344
Proser2	84	3.3492e-08	3.45563e-07	0.15344	-0.157831
Mfsd4a	85	3.60564e-08	3.70866e-07	0.0926618	0.00373672
Rnd1	274	3.95937e-08	4.05989e-07	-0.149614	0.0904994
Ptpn11	275	4.77399e-08	4.88008e-07	-0.0261297	0.139443
Bcl2l14	86	4.83972e-08	4.93205e-07	0.11733	-0.0304964
Hcfc1r1	87	4.88931e-08	4.9673e-07	0.219995	0.166338
Klf3	88	5.05128e-08	5.11616e-07	0.1773	-0.100635
Trib1	276	5.08995e-08	5.13961e-07	0.00806106	0.223324
Fstl3	278	5.30337e-08	5.33883e-07	-0.00349891	0.0791524
S100a6	279	5.55675e-08	5.57695e-07	-0.34112	0.331988
Scgb2b27	89	5.93619e-08	5.93978e-07	0.198987	0.0492232
Cast	157	6.11397e-08	6.09924e-07	0.145614	0.16585
Slc3a2	281	6.33409e-08	6.29985e-07	0.0790665	0.185114
Chd7	91	6.64165e-08	6.56631e-07	0.140004	0.0967677
Cdc42ep4	282	6.63822e-08	6.56631e-07	0.0714122	0.200368
Ralb	283	6.74982e-08	6.65339e-07	-0.142563	0.163283
Fosl2	284	7.57957e-08	7.44912e-07	0.0846412	0.159474
H2-T23	285	7.6191e-08	7.46582e-07	-0.00780182	0.202605
Myo1c	136	7.69955e-08	7.52239e-07	0.118059	0.12543
Spindoc	287	7.87059e-08	7.66688e-07	0.0470587	0.10986
Prss8	288	8.0493e-08	7.81797e-07	-0.029753	0.139441
Ets2	289	8.4411e-08	8.17454e-07	0.0811958	0.193491
Slc25a25	290	8.95562e-08	8.64752e-07	0.0497549	0.0958943
Hmgb2	92	9.19559e-08	8.84996e-07	0.152363	-0.0808918
Casz1	164	9.21871e-08	8.84996e-07	0.127248	0.153686
Coro1c	95	1.16077e-07	1.11112e-06	0.133112	0.0671488
Sh3kbp1	97	1.28907e-07	1.22684e-06	0.116406	-0.00459829
Trim47	292	1.28591e-07	1.22684e-06	-0.0523066	0.270781
Cst6	98	1.31713e-07	1.24995e-06	0.103599	0.0472496
Dnajc21	293	1.37869e-07	1.30464e-06	0.0837292	0.135334
Pdcd5	99	1.47993e-07	1.39645e-06	0.187666	-0.0504166
Krt80	294	1.49607e-07	1.40766e-06	0.0343454	0.0905443
S100a13	295	1.50408e-07	1.4112e-06	-0.248683	0.20891
Wsb1	296	1.65841e-07	1.5516e-06	-0.0220652	0.117111
Hspb1	297	1.68476e-07	1.57181e-06	-0.324077	0.382344
Pgam1	100	1.70777e-07	1.58662e-06	0.231709	-0.11519
Spint1	298	1.71021e-07	1.58662e-06	0.0797275	0.136456
Msrb1	101	1.94872e-07	1.80284e-06	0.174088	-0.149474
Rab7b	286	2.07713e-07	1.91628e-06	0.0946638	0.144622
Cnn3	301	2.14078e-07	1.96952e-06	0.0763443	0.173089
Gprc5a	302	2.30615e-07	2.11578e-06	0.00545471	0.105395
Samd9l	303	2.43892e-07	2.23141e-06	0.0233118	0.107178
Zfp36	304	2.47484e-07	2.25759e-06	0.0855941	0.171315
Clic6	305	2.48117e-07	2.25759e-06	-0.0330377	0.078907
Stmn1	102	2.49554e-07	2.25826e-06	0.0918733	-0.320145
Epb41l4aos	306	2.49453e-07	2.25826e-06	0.0439076	0.105995
Map2k4	307	2.51634e-07	2.27088e-06	0.0451741	0.12882
Limd2	103	2.52327e-07	2.27094e-06	0.155094	-0.210472
Wap	104	2.5552e-07	2.29345e-06	0.227187	-0.586746
Flna	105	2.59981e-07	2.32718e-06	0.161553	0.014189
Mt1	106	2.72695e-07	2.43256e-06	0.291142	-0.343194
Cyld	308	2.73222e-07	2.43256e-06	0.0281154	0.129617
March7	309	2.81447e-07	2.49907e-06	0.0810964	0.132687
Ppif	310	2.95773e-07	2.61925e-06	-0.00512125	0.191715
Hexb	311	3.0981e-07	2.73624e-06	-0.028053	0.10473
Pea15a	312	3.43418e-07	3.025e-06	0.0317595	0.165419
G3bp1	313	3.58242e-07	3.14721e-06	-0.164654	0.176536
Itgb4	107	3.74726e-07	3.28332e-06	0.155613	-0.00191419
Tuba1a	108	3.94275e-07	3.4426e-06	0.234507	-0.107594
Golgb1	314	3.94984e-07	3.4426e-06	0.106908	0.168028
Ccnt1	316	4.06218e-07	3.52197e-06	0.0341968	0.116619
Dusp14	315	4.05475e-07	3.52197e-06	-0.159271	0.168208
Cry1	317	4.10308e-07	3.54814e-06	0.00995075	0.112336
Trib3	109	4.11515e-07	3.54932e-06	0.12936	-0.143383
Il6st	318	4.37015e-07	3.75947e-06	0.053631	0.098273
Chchd5	110	4.62144e-07	3.96534e-06	0.137953	0.0160003
Tsc22d1	111	4.71417e-07	4.03445e-06	0.198943	0.0707744
Erf	112	4.89136e-07	4.17531e-06	0.135064	0.116104
Lzts2	113	5.07283e-07	4.31908e-06	0.134832	-0.0857318
Psmb8	114	5.10873e-07	4.33849e-06	0.215097	-0.416402
St6galnac6	115	5.17096e-07	4.38011e-06	0.141749	0.00870931
Cdc42ep5	116	5.19485e-07	4.38912e-06	0.133243	0.0489911
Smim15	141	5.47687e-07	4.61562e-06	0.121474	0.125552
Prnp	320	5.55984e-07	4.66708e-06	0.0149581	0.112398
Cebpb	321	5.56612e-07	4.66708e-06	-0.165161	0.299916
Jun	322	5.7883e-07	4.84113e-06	0.103688	0.250461
Arf2	323	6.46335e-07	5.3921e-06	-0.0015835	0.131941
Ier2	117	6.74493e-07	5.61287e-06	0.206837	0.00838984
Wdr45	233	7.15721e-07	5.94102e-06	0.0766778	0.0974282
Vdac1	118	7.42583e-07	6.14859e-06	0.167504	-0.173064
Plk3	119	7.7829e-07	6.42817e-06	0.138887	0.078598
Daam1	246	7.92369e-07	6.52817e-06	0.114208	0.146525
Ddit3	120	8.0225e-07	6.59318e-06	0.136426	0.0999999
Zswim4	326	8.49949e-07	6.9679e-06	0.036314	0.089307
Dnajb9	327	1.02092e-06	8.34884e-06	-0.169938	0.144635
Mcrip1	124	1.052e-06	8.58184e-06	0.189252	-0.233937
Katnbl1	328	1.0741e-06	8.74057e-06	-0.0818894	0.109471
Sbsn	125	1.11727e-06	9.06959e-06	0.127422	0.0108431
Rad21	225	1.16968e-06	9.47183e-06	0.0897792	0.111519
Pld2	330	1.23206e-06	9.95265e-06	-0.0203389	0.0906799
Acot9	331	1.32881e-06	1.0708e-05	-0.00517185	0.138494
Smagp	126	1.34889e-06	1.08435e-05	0.182573	0.121715
Myo6	170	1.39421e-06	1.11806e-05	0.120827	0.12818
Esd	333	1.4097e-06	1.12776e-05	0.112671	0.176831
Pim3	334	1.46577e-06	1.16979e-05	0.00967893	0.0737113
Cebpg	263	1.47824e-06	1.17691e-05	0.116775	0.153914
Egfr	336	1.50969e-06	1.19906e-05	-0.028934	0.105999
Csf3	337	1.55788e-06	1.23438e-05	-1.76979	0.350705
Cdc34	128	1.5749e-06	1.24488e-05	0.159288	-0.00189732
Pfkp	129	1.57942e-06	1.24548e-05	0.156069	0.109598
Luzp1	338	1.6843e-06	1.32503e-05	0.0582616	0.13588
Tsc22d4	241	1.83214e-06	1.43792e-05	0.116791	0.145338
Swap70	204	1.85764e-06	1.4545e-05	0.0904048	0.105387
Bdp1	341	1.91533e-06	1.49612e-05	0.0217719	0.121743
Rock2	342	1.95452e-06	1.52315e-05	0.0400677	0.16401
Gabpb1	343	2.01073e-06	1.56327e-05	0.0528168	0.107333
Gm15867	344	2.02816e-06	1.57313e-05	0.0148331	0.0889742
Arid5b	130	2.05492e-06	1.59016e-05	0.140399	0.0717736
Ptpn1	345	2.26149e-06	1.74593e-05	-0.0833975	0.148187
S100a14	131	2.28756e-06	1.76196e-05	0.159519	0.152193
Tpbg	346	2.2998e-06	1.76727e-05	-0.0182132	0.129904
Gdpd1	132	2.37463e-06	1.82055e-05	0.0744392	0.0448741
Nectin4	133	2.45948e-06	1.88125e-05	0.0947587	0.00633592
Ubap1	347	2.49704e-06	1.90557e-05	0.0327331	0.11353
Aldh1a3	134	2.5699e-06	1.95667e-05	0.255703	-0.116739
Myc	348	2.57852e-06	1.95873e-05	-0.0836972	0.139333
Ralgds	350	2.69707e-06	2.0441e-05	0.000148372	0.139405
Bcar1	351	2.85625e-06	2.15512e-05	0.0294073	0.13942
Btg3	352	2.85658e-06	2.15512e-05	-0.0318189	0.0861961
Vamp3	248	3.01016e-06	2.26583e-05	0.0921112	0.115465
Rc3h1	354	3.12459e-06	2.34663e-05	-0.0367319	0.0912705
Tmed5	356	3.35338e-06	2.51276e-05	-0.00201108	0.142607
Pvr	357	3.4089e-06	2.54859e-05	0.0623616	0.126766
Ovol1	137	3.47822e-06	2.59456e-05	0.112654	0.0271556
Vat1	138	3.51975e-06	2.61964e-05	0.143986	0.093826
Ier3	358	3.60526e-06	2.67727e-05	0.0557629	0.278327
Rlim	359	3.61523e-06	2.67867e-05	-0.0356062	0.107708
Ercc1	360	3.6306e-06	2.68405e-05	-0.0140012	0.1062
Gab1	361	3.9879e-06	2.94163e-05	0.0489098	0.099084
Erc1	362	4.13106e-06	3.04046e-05	0.0160567	0.120298
2810474O19Rik	139	4.24447e-06	3.11701e-05	0.162783	0.0230656
Kctd9	363	4.29482e-06	3.147e-05	0.00315882	0.069646
Tspo	140	4.38575e-06	3.20653e-05	0.190563	0.152379
Gm26532	364	4.50657e-06	3.28761e-05	-0.00336662	0.0958847
P4ha1	365	5.04091e-06	3.66934e-05	0.000717494	0.0718975
Tmc4	366	5.2485e-06	3.81207e-05	0.0641291	0.143045
Nmd3	367	5.39613e-06	3.91072e-05	-0.0691541	0.103249
Mxi1	143	5.51412e-06	3.9875e-05	0.0634027	0.0423951
Dtx3	369	5.9022e-06	4.25884e-05	0.0279402	0.0865287
Akirin1	370	5.97266e-06	4.30032e-05	0.0269995	0.111945
Llgl2	145	6.05861e-06	4.35273e-05	0.138499	0.129581
Aen	371	6.07797e-06	4.35719e-05	-0.0679228	0.122812
Irf6	146	6.22296e-06	4.4515e-05	0.139301	0.0971249
Muc1	372	6.26355e-06	4.47088e-05	-0.0519414	0.115959
Rb1cc1	373	7.06943e-06	5.03526e-05	0.0566811	0.115509
Mirt1	374	7.2677e-06	5.16537e-05	-0.0329191	0.127727
Mgat1	376	7.43218e-06	5.2597e-05	0.0333709	0.104476
Prpf38b	375	7.42499e-06	5.2597e-05	-0.0340796	0.12158
F2rl1	305	7.52897e-06	5.31684e-05	0.0880477	0.114192
Sphk1	378	7.89078e-06	5.56048e-05	-0.252378	0.112325
Atf5	227	8.08216e-06	5.68325e-05	0.132597	0.150593
Cln5	380	8.20544e-06	5.75772e-05	0.0359512	0.0757412
Cotl1	149	8.37288e-06	5.86278e-05	0.207274	0.20085
Lasp1	150	8.4532e-06	5.86939e-05	0.125144	0.0773702
Tead1	382	8.43104e-06	5.86939e-05	0.0622909	0.110098
Coq8b	381	8.42301e-06	5.86939e-05	0.00485169	0.0846119
Grpel2	383	8.4514e-06	5.86939e-05	-0.0300165	0.138964
Cd55	384	8.75447e-06	6.06586e-05	-0.00281849	0.113342
Reep3	385	8.89914e-06	6.15322e-05	-0.0528128	0.136075
Pawr	386	8.93586e-06	6.16574e-05	0.00446582	0.0904939
Mbp	387	9.35903e-06	6.44431e-05	0.0175168	0.0858368
Prdx2	152	9.70821e-06	6.67087e-05	0.160545	-0.391928
Cenpx	153	9.83876e-06	6.74658e-05	0.168834	-0.667572
Natd1	389	1.00582e-05	6.88277e-05	-0.0138156	0.0602238
Ephx1	391	1.03065e-05	7.03816e-05	-0.00786957	0.101178
Desi2	154	1.04704e-05	7.13538e-05	0.137881	-0.130646
Cebpd	392	1.12004e-05	7.61721e-05	-0.250629	0.279429
Arhgef5	393	1.12312e-05	7.6225e-05	-0.00930838	0.117538
Stx11	394	1.13989e-05	7.7205e-05	0.0046562	0.0681783
Arrdc4	155	1.15074e-05	7.77806e-05	0.143393	-0.0344571
Rock1	395	1.20899e-05	8.15515e-05	0.03827	0.121297
Mb	156	1.2157e-05	8.18375e-05	0.0519717	-0.0021869
S100a16	397	1.3058e-05	8.77247e-05	-0.219159	0.18539
Camk2n1	398	1.31952e-05	8.84667e-05	-0.0852569	0.0608577
Eaf1	399	1.34101e-05	8.97259e-05	-0.0221656	0.0688922
Stbd1	400	1.40979e-05	9.41376e-05	0.0244173	0.0888542
Papss1	158	1.42665e-05	9.50715e-05	0.133856	-0.0328019
Fcgbp	401	1.43712e-05	9.55774e-05	0.00630751	0.179901
Kras	188	1.45245e-05	9.64029e-05	0.146741	0.145306
Gprc5c	159	1.50252e-05	9.95268e-05	0.0995644	0.081537
Pglyrp1	160	1.63004e-05	0.000107758	0.11621	-0.269148
Gm11361	162	1.64534e-05	0.000108337	0.160905	-0.0551961
Tmpo	161	1.64407e-05	0.000108337	0.0963261	-0.00535614
Pmvk	163	1.67718e-05	0.000109996	0.0912901	-0.171295
Fam133b	403	1.67697e-05	0.000109996	-0.0392018	0.122768
Rest	404	1.70974e-05	0.00011191	0.0152377	0.125438
Por	407	1.80906e-05	0.000118178	-0.0511132	0.09628
Chn2	165	1.88116e-05	0.000122645	0.109483	-0.250537
Asns	166	1.89426e-05	0.000123257	0.101693	-0.0939971
Selenbp1	167	1.94087e-05	0.000126042	0.0959366	0.0400709
Mdfi	408	1.95635e-05	0.000126799	-0.265168	0.182684
Kctd11	409	1.96121e-05	0.000126866	-0.0102498	0.10813
Anxa6	168	1.98488e-05	0.000127941	0.14837	-0.125574
Srxn1	410	1.98556e-05	0.000127941	-0.274649	0.164779
Tbc1d1	411	2.02648e-05	0.000130325	-0.0400575	0.0843165
Eif3j2	412	2.04979e-05	0.000131568	-0.0140515	0.131443
Cep170b	413	2.19517e-05	0.000140627	0.0409721	0.112658
Bag5	414	2.22446e-05	0.000142228	0.0146467	0.0918043
Tlr2	415	2.23545e-05	0.000142655	-0.0779004	0.112241
1810013L24Rik	416	2.29453e-05	0.000146144	0.0294359	0.104102
Shisa5	417	2.31193e-05	0.00014697	-0.260899	0.114879
Tbrg1	172	2.48837e-05	0.000157883	0.142163	-0.0263246
4833407H14Rik	418	2.67687e-05	0.000169518	-0.0140434	0.053432
Qk	419	2.7549e-05	0.000174102	0.0519688	0.0823334
Trim16	420	2.75976e-05	0.000174102	0.0485561	0.0996041
Ssu72	175	2.78019e-05	0.000174724	0.146284	-0.0577559
Nol7	174	2.77929e-05	0.000174724	0.138987	-0.198935
Dhx40	421	2.79623e-05	0.0001754	-0.00337401	0.0774088
Ptp4a2	422	2.82616e-05	0.000176942	-0.0510243	0.140708
Ak1	423	2.85176e-05	0.000178208	-0.0528495	0.0726835
Liph	177	2.87732e-05	0.000179467	0.0898559	0.066062
Mapk3	179	2.92907e-05	0.000182009	0.135231	0.00243479
Btbd10	424	2.92508e-05	0.000182009	-0.0591329	0.0787746
Rtraf	180	3.14121e-05	0.000194826	0.148172	-0.103117
Gapdh	181	3.16876e-05	0.000196167	0.212024	-0.1454
Parp6	182	3.32315e-05	0.000205341	0.0855654	-0.0825903
Klhl21	425	3.3605e-05	0.000207262	-0.0287413	0.0809954
Phactr1	183	3.50763e-05	0.000215935	0.10534	-0.134109
Eloa	426	3.52058e-05	0.00021633	-0.0204827	0.0836655
Ctla2a	228	3.67397e-05	0.000225337	0.0630227	0.0715467
Tcp11l2	428	3.74354e-05	0.00022918	-0.0627189	0.0717895
Smad3	429	3.7635e-05	0.000229976	-0.030302	0.0724357
Mast4	430	3.92095e-05	0.000239156	-0.152135	0.123282
Arc	431	3.93232e-05	0.000239409	0.0214073	0.0781622
Pip4k2c	432	3.95986e-05	0.000240643	0.0124111	0.0785128
Chac1	184	4.00111e-05	0.000242705	0.13064	-0.100347
Rcan1	433	4.05812e-05	0.000245713	0.0106607	0.0753188
Kdm5a	321	4.21935e-05	0.000254544	0.0828739	0.107886
Zfp655	434	4.21207e-05	0.000254544	-0.00741476	0.0912207
Kmt2a	436	4.23508e-05	0.000255029	0.0417319	0.0935848
Creb5	185	4.46354e-05	0.000268298	0.109444	0.07467
Shf	186	4.51166e-05	0.0002707	0.101826	-0.355368
Gars	187	4.72037e-05	0.00028271	0.114062	-0.129572
Mob3c	437	4.90159e-05	0.000293034	0.0271563	0.0602702
Ephb3	438	5.05227e-05	0.00030134	0.0198976	0.0883115
Parm1	439	5.05873e-05	0.00030134	-0.0193923	0.0689307
Ldlrad4	440	5.24697e-05	0.000311992	-0.104991	0.0857223
Grb7	190	5.58215e-05	0.000331327	0.0726763	0.0627684
Ankrd11	191	5.90864e-05	0.000350079	0.142527	0.102254
Bik	306	6.10562e-05	0.000361104	0.0777	0.0911586
N4bp2l1	444	6.13056e-05	0.000361933	0.0247992	0.0403943
Smad7	445	6.28396e-05	0.000370329	-0.0889532	0.0935271
Thra	446	6.33579e-05	0.00037272	-0.00740274	0.0773051
Tnfrsf10b	447	6.51039e-05	0.000382312	0.00854354	0.0615053
Zfand5	448	7.05577e-05	0.000413606	0.0735069	0.188681
Rlf	449	7.23512e-05	0.00042337	0.00720966	0.0559626
Tjp1	450	7.28052e-05	0.000425275	0.0488238	0.0958768
Snhg6	193	7.64901e-05	0.000446013	0.111078	0.0912093
Ankrd12	451	7.68607e-05	0.000447386	0.0631087	0.10521
Tnfrsf23	194	7.72838e-05	0.000449059	0.072889	0.0292917
Sult2b1	366	7.86041e-05	0.000455931	0.0458227	0.0628889
Bag3	453	8.08584e-05	0.000468187	-0.122496	0.110755
Tinagl1	454	8.17404e-05	0.000472468	-0.113297	0.154225
Naa20	195	8.37038e-05	0.000482974	0.125674	0.12052
Tspan13	196	8.51134e-05	0.000490253	0.0965755	-0.0785597
Bet1l	455	8.68176e-05	0.000499201	0.00908578	0.103885
Mgat4b	457	8.92765e-05	0.00051245	-0.00178526	0.0614873
Tlcd2	458	9.05577e-05	0.000518905	-0.00294279	0.0477414
Tead2	197	9.61423e-05	0.000549633	0.0973442	-0.044315
Sept11	459	9.62521e-05	0.000549633	-0.0844427	0.120924
Pls3	460	9.67454e-05	0.000551499	-0.00435619	0.0941845
Fnip1	461	9.71583e-05	0.000552901	0.0030709	0.0691265
Irak3	462	0.000100724	0.00057221	0.0342291	0.0555899
Colec12	199	0.000101036	0.000572997	0.0607048	0.0333083
Sidt2	463	0.000102129	0.000578206	0.045573	0.090486
Cdcp1	464	0.000104374	0.00058991	-0.0971924	0.119969
Slco1a5	465	0.000107162	0.000604635	0.0158632	0.0548571
Pnrc1	200	0.000107386	0.000604868	0.155944	0.00433754
Ptgs2	466	0.000110766	0.000622844	-0.177509	0.103089
Nab2	201	0.000113338	0.000636228	0.0664853	0.0181381
Arfgap3	202	0.000113681	0.000637076	0.0891477	0.0515605
Ppl	203	0.000123681	0.000691943	0.0884705	0.0498073
Fbxo30	467	0.000130048	0.000726337	0.0454168	0.0759961
Amd1	468	0.000133016	0.000741665	-0.014575	0.0973534
Josd2	205	0.000135786	0.000755838	0.0929576	-0.0837757
Itsn2	469	0.000136934	0.000760947	0.0388144	0.09771
Pnpla2	207	0.000138868	0.00076886	0.1044	0.0481371
Plod1	206	0.000138834	0.00076886	0.0723894	0.0618027
Cnksr1	470	0.000139054	0.00076886	-0.0464568	0.0714764
Anln	209	0.000143421	0.000791686	0.0394354	-0.0804205
Kif2a	471	0.000147323	0.000811872	-0.0406372	0.0909165
Lgals7	210	0.000150349	0.000827171	0.119472	-0.130296
Ndufv3	211	0.000160509	0.000881604	0.135933	-0.202042
Hivep1	473	0.000160811	0.0008818	0.00443747	0.0598064
Jak1	474	0.000162013	0.000886919	-0.0795751	0.102729
Ppp1cc	213	0.000163443	0.000890335	0.137388	0.0911914
Snx21	212	0.000163155	0.000890335	0.0759009	0.0330827
Mcl1	475	0.000163376	0.000890335	-0.183022	0.124539
Gas6	476	0.00016423	0.00089315	-0.289425	0.124868
Banp	477	0.000168401	0.000914337	-0.0120114	0.0701163
Serpinb6a	216	0.000168974	0.000915945	0.12085	0.0661704
Klc3	218	0.0001708	0.00092433	0.124001	0.0199644
Ext1	478	0.000171498	0.000926594	-0.0322009	0.076207
Itgav	479	0.000172251	0.000929143	-0.181004	0.105212
N4bp3	480	0.000173703	0.000935452	0.0110478	0.0686386
Qsox1	481	0.000175638	0.000944337	0.0448301	0.123142
Prc1	219	0.000178112	0.000954542	0.0450346	-0.0867101
Atf6	482	0.000177917	0.000954542	-0.00592692	0.0696471
Sp140	220	0.000179525	0.000960561	0.0997216	0.0504318
Xbp1	221	0.000189756	0.00101366	0.14277	0.0198267
Bsdc1	483	0.000191939	0.00102367	0.034382	0.0792058
Flt1	484	0.000193041	0.0010279	-0.00321656	0.070173
Kdelr3	486	0.000197929	0.00105055	0.0175818	0.0391436
Smurf2	485	0.000197924	0.00105055	-0.0648786	0.0822148
Cttnbp2nl	222	0.000199472	0.00105704	0.107976	0.0840153
Gale	223	0.00020132	0.00106435	0.0578517	-0.164452
Erbin	488	0.000201494	0.00106435	-0.0164578	0.0932205
Csn1s1	224	0.000205673	0.0010847	0.205479	-0.754454
Ahcyl2	489	0.000209422	0.00110172	-0.00523279	0.0642876
Serpinb8	490	0.000209566	0.00110172	-0.0319789	0.0698151
Akap8l	491	0.000214672	0.00112677	-0.00602726	0.0583084
Ldlrap1	226	0.000219932	0.00115255	0.0686468	0.0636533
Rhbdf1	492	0.000225789	0.00118138	-0.0496774	0.0876005
P4hb	229	0.000232825	0.00121627	0.163932	-0.297845
Ppp1r13l	493	0.000237421	0.00123833	0.00706834	0.0689256
Hs3st1	494	0.000238776	0.00124344	-0.300975	0.140104
Igsf3	495	0.000241132	0.00125373	0.0315839	0.119324
Foxo1	496	0.000244575	0.00126964	0.0120331	0.0723724
Afdn	497	0.000248583	0.00128843	0.0535887	0.096422
Srpr	498	0.000251254	0.00130024	0.0289649	0.101083
Card19	232	0.000256709	0.0013264	0.137643	0.109151
Acbd3	499	0.00025803	0.00133115	-0.0134772	0.100793
Hacd1	234	0.000264704	0.00136345	0.0842065	-0.0520385
Tubb4b	501	0.000274835	0.00141344	-0.41634	0.145267
Oxct1	235	0.000277052	0.00142263	0.108979	-0.100981
Adamts1	236	0.000281379	0.00144261	0.151383	-0.00898021
Emid1	237	0.000283651	0.00145201	0.104845	-0.0243989
Mid1ip1	238	0.000287588	0.00146989	0.059057	-0.0458035
Bid	502	0.000293063	0.00149557	0.00910116	0.0857962
Zranb1	503	0.00029648	0.00151068	0.00813346	0.075693
Crebrf	504	0.000300654	0.00152959	-0.022974	0.0498629
Rab17	266	0.000303427	0.00154134	0.0435034	0.0416002
Dirc2	505	0.000309158	0.00156804	0.00701598	0.051365
Car6	239	0.000309687	0.00156833	0.0716242	-0.0139199
Cxadr	508	0.000343538	0.00173709	0.0617416	0.0898744
Syngr2	240	0.000350944	0.00177184	0.147081	-0.187222
Tmem51	336	0.000352448	0.00177672	0.0681126	0.0815967
Ogt	271	0.000363131	0.00182502	0.105368	0.0997138
Usp22	242	0.000362979	0.00182502	0.0804938	0.0109485
Kxd1	243	0.000370699	0.00186023	0.0780001	-0.0340159
Acap2	513	0.000371664	0.00186226	-0.0449985	0.0961888
Arg1	244	0.000379241	0.0018963	0.106624	-0.016724
Cadm4	514	0.000379603	0.0018963	0.028386	0.0666442
Hebp2	245	0.000385573	0.00192322	0.0906258	-0.0295795
Hist1h4i	247	0.000391608	0.00195039	0.0770071	-0.024162
Pgm2	249	0.000394089	0.00195979	0.0681532	0.0146249
Pxdc1	250	0.000419131	0.0020812	0.140761	0.0990387
Zfp36l1	251	0.000428222	0.0021208	0.137059	-0.330132
Abtb2	517	0.000428386	0.0021208	-0.0232834	0.0769589
Gabpa	520	0.000452344	0.00223607	0.0160257	0.0490485
Nipal1	253	0.000469374	0.00231334	0.0858832	0.0361204
Cish	252	0.000468727	0.00231334	0.0557547	-0.0121739
Lamb2	254	0.000471658	0.00232115	0.0607704	0.0509123
Tmem54	256	0.000486143	0.00238534	0.0406618	-0.0731064
Hp1bp3	521	0.000485901	0.00238534	0.0241698	0.0836973
Col9a1	257	0.000517718	0.00253651	0.105534	-0.208934
Insl6	259	0.000539161	0.00263767	0.0619021	-0.0265519
Arhgef39	523	0.000549578	0.00268436	0.0109785	0.0341923
Clip1	524	0.000550325	0.00268436	-0.0563766	0.085215
Pycr1	261	0.000565866	0.0027561	0.0735937	-0.00865708
Acox1	262	0.00056904	0.00276749	0.0966616	0.00900656
Dkkl1	264	0.000585877	0.00284443	0.0913913	-0.0175939
Trmt10c	525	0.000586577	0.00284443	-0.0191361	0.0537244
Anapc11	265	0.000594582	0.00287903	0.1202	-0.408064
Stk40	526	0.000599896	0.00290052	0.050292	0.0975257
Atg2a	527	0.000607934	0.0029351	0.0185206	0.0485273
Sun2	267	0.000610346	0.00294246	0.0575085	0.0397058
Rangap1	528	0.00061977	0.00298354	0.00952501	0.092281
Bex3	268	0.000622455	0.00299212	0.110685	-0.207701
Arntl	530	0.000627167	0.0030104	0.0128685	0.0589134
Plin2	269	0.000642132	0.00307777	0.189715	0.0408712
Fcho2	531	0.000647148	0.00309733	-0.00110831	0.0568938
Ifi211	533	0.000663527	0.00317114	-0.10428	0.0394687
Pi4k2a	534	0.000665143	0.00317429	0.00794297	0.0574437
Chmp4c	270	0.000679821	0.00323967	0.100865	0.0445826
Phf3	535	0.00072487	0.00344938	0.0355138	0.0850493
Nr4a1	272	0.000726752	0.00345338	0.0730918	0.0529342
Psmb9	273	0.000737408	0.00349399	0.0910118	-0.26928
Rassf8	522	0.000736684	0.00349399	0.0441102	0.068138
Tex10	539	0.000741543	0.00350856	0.0215647	0.0479088
Ldha	274	0.000754067	0.00356015	0.136158	-0.379524
Twistnb	541	0.000754598	0.00356015	-0.0392268	0.0733731
Rsad2	296	0.00075959	0.00357861	0.119475	0.118575
Tuba4a	542	0.000770792	0.00362623	-0.305034	0.133411
Id3	275	0.000805395	0.00378364	0.0439991	0.0296471
Vegfa	543	0.000808818	0.00379434	-0.0518659	0.0646888
Hk1	276	0.000818152	0.0038327	0.07521	-0.0786511
Anxa11	546	0.000825632	0.0038514	-0.0169318	0.0593759
Wfdc2	545	0.000825339	0.0038514	-0.0228586	0.104321
Cflar	544	0.000824925	0.0038514	-0.086495	0.0893059
Ppp1r18	547	0.00082893	0.00386135	-0.0563517	0.0590004
Vmp1	548	0.000850092	0.00395436	-0.136894	0.106543
Rflnb	549	0.000853623	0.00396522	-0.125989	0.0756349
Gm20186	550	0.000882278	0.00409259	0.0139968	0.0395488
Phlda1	533	0.000886563	0.00410671	0.107721	0.193453
Cpe	552	0.00090406	0.00418191	-0.20601	0.112363
Nupr1	553	0.000927242	0.00428316	-0.0644553	0.200225
Syne2	554	0.000959598	0.00442645	-0.0261303	0.0680632
Cks2	280	0.000965812	0.00444891	0.0922814	-0.100152
Slc30a1	281	0.000971833	0.00445846	0.0658389	0.0203116
Eppk1	282	0.000971923	0.00445846	0.0451817	0.0178233
Os9	555	0.000969738	0.00445846	-0.0642438	0.0793702
Spink5	283	0.000995549	0.00456053	0.0580214	-0.0263155
Psrc1	284	0.00100321	0.00458925	0.0858693	-0.00714152
Tor1aip1	556	0.00101905	0.00465528	-0.0120763	0.0946498
Macrod1	557	0.00104006	0.00474475	0.0153098	0.0427039
Klf10	558	0.00104713	0.0047704	0.0324859	0.0778482
Dmtf1	559	0.00105854	0.00481579	0.0165808	0.0515418
Zzef1	449	0.00106674	0.00484644	0.0435327	0.0554641
Phldb1	562	0.00106966	0.00485303	-0.00247678	0.0365435
Sorl1	563	0.00107237	0.00485866	-0.0139615	0.0351856
Osmr	564	0.00107686	0.00487233	-0.0856015	0.0755904
Wsb2	565	0.00108535	0.00490408	-0.0790922	0.0976509
Cst3	566	0.00109549	0.00494315	-1.41832	0.23716
Nrg1	567	0.00110361	0.00497301	-0.0469489	0.0541125
D1Ertd622e	568	0.00111259	0.00500666	-0.0227439	0.0657893
Mien1	285	0.00111566	0.00501367	0.121632	-0.0244913
Ttc36	570	0.00115956	0.00520388	0.0114332	0.0225191
Higd1a	287	0.00116592	0.00522534	0.134778	0.104329
Dpy30	288	0.00118375	0.0052981	0.0981751	-0.223791
Slco2a1	289	0.00120167	0.00537104	0.0954383	0.0127947
Ccl9	290	0.00121302	0.00541446	0.0468156	-0.0469402
Acot1	291	0.00125782	0.00560688	0.0836185	-0.340825
Itm2c	573	0.00131508	0.00585421	-0.0679431	0.0915623
Thrsp	292	0.00133163	0.00591995	0.0401194	-0.170162
Nucb2	293	0.00136854	0.0060759	0.106635	-0.147931
Ppp1cb	294	0.00138134	0.0061245	0.109787	0.07324
Rbpms	405	0.00140388	0.0062161	0.0711821	0.084119
Foxp1	575	0.00141741	0.00626764	0.00715274	0.0575453
Slc45a3	576	0.00144601	0.00638558	-0.0279999	0.0547474
Klk8	297	0.00146123	0.00644421	0.0611607	0.0565789
Tspan33	577	0.00147472	0.00649503	-0.0340509	0.0624767
Rhov	578	0.00148253	0.00652078	-0.0411919	0.079539
Rem2	328	0.00149149	0.00654386	0.0642069	0.0627787
Ttc9	342	0.00149173	0.00654386	0.0430538	0.04562
Tnfaip2	580	0.00149434	0.00654662	-0.352285	0.226246
Mir17hg	503	0.0015263	0.00667782	0.0188213	0.0262371
Itga3	583	0.00153688	0.00671524	-0.0223888	0.043128
Zdhhc18	584	0.00154367	0.00673601	0.00211878	0.0487108
Car12	298	0.00154655	0.00673972	0.0806057	0.0625054
Foxn3	585	0.00155609	0.00677237	0.0106737	0.0688599
Tap1	299	0.00155999	0.00678044	0.0689228	-0.0402576
Fam83g	586	0.00157158	0.00682187	-0.0164455	0.0466044
Fndc3b	587	0.00161176	0.00698712	0.0127636	0.0625899
Serpine1	588	0.00162623	0.0070406	0.0166743	0.0459171
L1cam	301	0.00163646	0.00707568	0.0351367	0.00321868
Mpp5	589	0.00163933	0.00707882	-0.110983	0.0770596
Ppp3ca	302	0.00167066	0.00719533	0.105507	-0.0163684
Insig2	334	0.00166971	0.00719533	0.0743602	0.0722103
Rfc4	304	0.00169515	0.00729133	0.0326784	-0.0812462
Ell	591	0.00169808	0.00729448	-0.0299299	0.0476758
Epb41l5	381	0.00172587	0.00740425	0.0436155	0.0506032
Ctgf	307	0.00180788	0.00774603	0.0415091	0.0251813
Pycr2	308	0.00181062	0.00774779	0.0513703	-0.129003
Wwc2	378	0.00183745	0.00785243	0.0749968	0.0766401
Efnb1	594	0.00185794	0.00792975	0.00434501	0.0487265
Gm20219	309	0.00190669	0.00812737	0.0487362	-0.0116483
Blcap	596	0.00191218	0.00814029	-0.00214826	0.0827562
Slc6a14	310	0.00192299	0.00817579	0.0325658	0.0196517
Smg1	597	0.00194191	0.00824563	0.0134856	0.0614639
Lrrc51	312	0.0019944	0.0084577	0.0365375	0.0139176
Il18bp	598	0.00201915	0.00855171	-0.0107722	0.0617227
Rnf167	465	0.00203428	0.00860476	0.0599716	0.0746345
Suco	600	0.00205065	0.00866295	-0.000597343	0.0546293
Rbm12	601	0.00205785	0.00868228	0.0046638	0.0510902
Tmem43	603	0.00211077	0.00887765	0.0137631	0.0794263
Itgb6	602	0.00210769	0.00887765	0.0113527	0.0415768
Fgd6	604	0.0021122	0.00887765	0.0107009	0.0549678
Bmp2k	605	0.0021182	0.0088916	0.0224223	0.0414246
Rnf24	606	0.00212839	0.00892306	-0.0389479	0.0407229
Ifih1	394	0.00215626	0.00902847	0.0575027	0.0670255
Crip2	313	0.00217232	0.00908426	0.145872	-0.163704
Ptrh1	609	0.00219835	0.0091815	0.0127144	0.061871
Rbbp6	610	0.00221226	0.00922796	-0.0500968	0.0836946
Klk14	315	0.002235	0.00931109	0.0419369	0.00887768
Rnf19a	364	0.00225053	0.00936399	0.0636324	0.0645192
Irf7	612	0.00225336	0.00936404	-0.431029	0.155337
Dusp10	316	0.00226976	0.00942034	0.0313938	0.0210933
Gjb4	613	0.00229046	0.00949437	0.0196916	0.0514215
Nr3c1	614	0.00232399	0.00962134	-0.0668718	0.0761407
Gorab	615	0.00233022	0.00963505	0.0206033	0.041785
Acvr1	616	0.00235701	0.00973369	-0.00812106	0.0492188
Egr2	339	0.00236372	0.00974923	0.0261056	0.0247181
Ccdc82	618	0.00239229	0.00984257	-0.00130899	0.0395497
Cp	617	0.0023908	0.00984257	-0.87059	0.128861
Slc38a10	319	0.00244711	0.0100556	0.0836204	-0.142205
Usp43	619	0.00246189	0.0101038	-0.0293442	0.0463285
Mospd1	320	0.00253592	0.0103948	0.0668462	0.0106398
Met	621	0.0025593	0.0104776	-0.159763	0.0680171
Ktn1	523	0.0025895	0.0105882	0.0637211	0.0864995
Apol8	623	0.00263841	0.0107749	-0.00442479	0.0230255
Calm3	322	0.00267904	0.0109139	0.101121	-0.217979
Wincr1	624	0.002676	0.0109139	0.00616655	0.110914
Ninj1	625	0.00270897	0.0110222	-0.003774	0.0853325
Mif4gd	323	0.00277405	0.0112732	0.103892	0.00690375
Scd1	627	0.00279298	0.0113362	-0.047387	0.0992581
Agfg1	501	0.0027973	0.0113399	0.0648829	0.086529
Blnk	325	0.00280851	0.0113714	0.0433392	-0.0627957
Rcor3	442	0.00281741	0.0113935	0.0426091	0.0495541
Sema6a	467	0.00286882	0.0115872	0.027533	0.0335615
Heatr5a	631	0.00289856	0.0116931	0.032342	0.0508719
Phf1	633	0.002941	0.0118499	0.00826622	0.0439912
Mdm2	634	0.00299875	0.0120679	-0.0312639	0.0841683
Fsd1l	329	0.00304444	0.0122369	0.0454516	0.0165787
Cir1	635	0.00307447	0.0123426	0.0400171	0.062633
Clic4	417	0.0031018	0.0124372	0.0776428	0.0892918
Kcnn4	330	0.00313049	0.0125371	0.133859	-0.183556
Ifngr2	637	0.0031393	0.0125572	-0.0521459	0.0823289
Krt79	331	0.00317959	0.0127022	0.0455792	-0.0365652
Tctn3	332	0.00318323	0.0127022	0.0192462	0.00447978
Sectm1b	638	0.00320933	0.012791	-0.00544982	0.0574041
Appl2	388	0.00322161	0.0128245	0.0555487	0.0580242
Sestd1	640	0.00337126	0.0134041	0.00976178	0.0485326
Usp36	335	0.00341866	0.0135763	0.0742976	-0.0281278
Itga6	631	0.00348866	0.0138376	0.0580048	0.0867295
Tcn2	643	0.00351413	0.013922	0.0672523	0.101964
Irgq	337	0.00353392	0.013967	0.0745488	0.0540636
Zfp467	644	0.00353174	0.013967	0.0168905	0.0202146
Dtx3l	338	0.00354215	0.0139828	0.0467542	0.00363484
Tnfaip3	645	0.00359754	0.0141846	-0.0044571	0.0378004
Nectin3	560	0.0036618	0.0144208	0.0303129	0.0414748
Ccdc163	340	0.00373632	0.0146968	0.0410737	0.0110171
Nt5c	341	0.00387599	0.0152281	0.115053	-0.344905
Zbtb20	647	0.00390569	0.0153266	-0.0672257	0.0674972
Sec61b	343	0.00394091	0.0154177	0.104797	-0.682113
Taok3	400	0.00394288	0.0154177	0.0575205	0.0568183
Gla	599	0.00393467	0.0154177	0.0232832	0.0334352
Ghr	650	0.00394796	0.0154194	-0.00536903	0.0455855
Tmcc3	651	0.00397562	0.0155091	0.0209045	0.041869
Rnf213	344	0.00405633	0.0158054	0.0782702	-0.0543037
Hipk1	652	0.00408691	0.0159058	-0.0796015	0.0567458
Phldb3	435	0.00409288	0.0159103	0.0418311	0.0485774
Scrg1	345	0.00410237	0.0159285	0.0616787	0.0221557
Hspg2	346	0.00412179	0.0159828	0.0351013	0.0265304
Tet3	654	0.00412599	0.0159828	0.0306697	0.074072
E130102H24Rik	455	0.00414355	0.0160321	0.0277963	0.0330718
Tulp4	656	0.00419708	0.0162202	0.0313049	0.0668385
Pqlc1	657	0.0042062	0.0162365	0.0478289	0.0848208
Tnks1bp1	347	0.00423053	0.0163114	0.0714361	0.0615107
Phc2	658	0.00436447	0.0168083	-0.0154722	0.0827255
Ccdc71l	659	0.00437492	0.0168289	0.00406463	0.0782533
Sesn2	348	0.00439017	0.016829	0.0611473	0.0293322
Upp1	494	0.00438596	0.016829	0.0271027	0.0331765
Osbpl5	661	0.00438653	0.016829	0.0154191	0.0362827
Lyzl4	349	0.00451435	0.017285	0.0275747	0.0192681
Scgb1c1	360	0.00453016	0.0173237	0.0279687	0.0245194
Fxyd5	662	0.00453491	0.0173237	0.00967333	0.0374221
Tob1	350	0.00454919	0.0173582	0.0864757	0.0699598
Ikzf5	663	0.00457177	0.0174243	0.0155113	0.0442819
Rnf103	664	0.00459994	0.0175115	-0.00260004	0.0497061
Mfhas1	666	0.0046682	0.0177509	-0.031738	0.0454979
Zfyve27	667	0.00467561	0.0177587	0.0246973	0.0489435
Them5	668	0.00472682	0.0179327	0.00508699	0.0809398
Mapkapk3	670	0.00482697	0.0182917	-0.00766442	0.0476648
Snhg20	352	0.00483452	0.0182993	0.0919509	-0.130912
Tpm1	353	0.00485899	0.018371	0.116653	0.0624908
Tmem184b	671	0.00486832	0.0183853	0.0163094	0.033902
Rhod	373	0.00489449	0.018463	0.0690672	0.05948
Cdr2	674	0.00501308	0.0188889	-0.0017487	0.0388913
Gde1	354	0.00501939	0.0188912	0.106353	-0.0837738
Wnt7b	676	0.00512329	0.0192603	-0.286902	0.0489876
2310057M21Rik	677	0.00515456	0.0193559	-0.0118569	0.0405494
Kpna1	678	0.00516241	0.0193634	-0.010797	0.0505462
Add3	680	0.00525628	0.019671	-0.00290215	0.0421551
Stxbp1	679	0.00525257	0.019671	-0.0115371	0.0320707
Mpzl1	358	0.00528128	0.0197422	0.0784636	-0.0221388
Rara	682	0.00535632	0.0200001	0.0233629	0.0388992
Abca1	683	0.00537443	0.0200452	-0.0130446	0.0198608
Frmd4b	361	0.00550261	0.0205001	0.0454051	0.0304041
Celf2	684	0.00555509	0.0206724	-0.181906	0.0725179
Galnt3	685	0.0056931	0.0211622	0.0156807	0.0904038
Zc3h13	363	0.0057669	0.0213886	0.0640649	0.0560179
Nfkb2	686	0.00576629	0.0213886	-0.0717545	0.0572057
Igsf8	365	0.0058223	0.0215458	0.0817404	0.0631985
Rsrp1	687	0.00582122	0.0215458	-0.0361173	0.100894
Btg1	688	0.0058383	0.0215809	-0.0149917	0.0975922
Edn1	689	0.00593507	0.0219141	-0.0496978	0.0635372
Dusp4	367	0.00594221	0.021916	0.0315161	-0.000266477
1500015A07Rik	690	0.00595177	0.0219269	-0.107823	0.0564395
Fn3k	691	0.00597444	0.021986	0.0107771	0.0178725
Ccl20	368	0.00602836	0.0221107	0.0468536	-0.00155826
Mtmr14	693	0.00602387	0.0221107	0.025988	0.0466705
Alcam	692	0.00602281	0.0221107	0.0060144	0.0358594
Slc28a3	370	0.00607648	0.0222625	0.133742	0.0335363
P4ha2	418	0.00608845	0.0222817	0.0208126	0.020698
Creb3l1	694	0.0061708	0.0225582	-0.0187694	0.058903
Nkd2	421	0.00630918	0.0229879	0.0183283	0.0193067
Zdhhc20	695	0.0062985	0.0229879	0.0182237	0.059863
Irx3	696	0.00630436	0.0229879	-0.122124	0.12528
Syt8	371	0.00634777	0.0231031	0.0195439	0.00957711
Igf1r	697	0.00642441	0.0233564	0.00943856	0.0200754
Txndc9	372	0.00652832	0.0237081	0.0944976	0.0387185
Pgf	698	0.00654963	0.0237595	0.0402995	0.0927715
Ccdc186	699	0.00656225	0.0237792	0.00556021	0.0544612
Morc4	428	0.00662946	0.0239965	0.0636049	0.0632186
Gm13056	374	0.00670306	0.0242364	0.0443606	0.0311123
Sntb2	375	0.00677858	0.0244827	0.0583077	-0.0714686
Unc119	376	0.00685203	0.024721	0.0560394	-0.00734314
Optn	701	0.00714994	0.0257678	-0.019234	0.0392531
Mcmbp	379	0.00726945	0.0261416	0.0556316	0.0501052
Zc3h7a	703	0.0072679	0.0261416	0.0202015	0.0469143
Emp3	704	0.00734974	0.0264017	-0.014118	0.0235259
Mboat1	705	0.00737105	0.0264495	0.00529842	0.0854689
Crim1	706	0.00744582	0.0266889	-0.00633343	0.0183208
Mier1	707	0.00745835	0.0267049	-0.0147631	0.0712576
Ctsa	708	0.00752306	0.0269075	0.0100298	0.063036
Abracl	380	0.00764569	0.0273166	0.0938228	-0.16254
Fam110a	710	0.00796434	0.0284245	-0.0852413	0.085349
Cenpq	382	0.00800325	0.0285326	0.0293456	-0.00757858
C130026I21Rik	383	0.00804955	0.0286229	0.0676001	0.0169277
Slk	384	0.0080545	0.0286229	0.0532172	0.00612341
Kdm7a	408	0.00804069	0.0286229	0.0404126	0.0358974
Slc5a1	542	0.00829701	0.0294531	0.0486271	0.0438223
Aldh2	712	0.00831922	0.0295003	0.0146505	0.0917248
Phf23	714	0.00845453	0.029948	0.00452127	0.0558696
Tob2	715	0.00856174	0.0302711	0.0284	0.0518974
Ace	716	0.00856403	0.0302711	-0.0881278	0.0454425
Aldoc	386	0.00858517	0.0303073	0.158969	-0.0938978
Lsm3	387	0.00859255	0.0303073	0.0599987	-0.0696058
Rbms2	390	0.0087722	0.0308097	0.0638006	-0.00708443
Ncbp3	389	0.00876468	0.0308097	0.0387598	0.0328886
Med13	718	0.00877003	0.0308097	-0.00218957	0.056481
Trp53rka	717	0.00874782	0.0308097	-0.0233761	0.0392558
Plxdc2	719	0.00886245	0.0310937	-0.0629607	0.0466233
Asf1a	391	0.00887235	0.0310955	0.063059	0.0143003
Hmgb3	392	0.00888814	0.0311179	0.0769576	-0.19731
Trim30a	721	0.00892942	0.0312294	-0.0224324	0.0301305
5730559C18Rik	722	0.00894897	0.0312648	-0.0535443	0.0427873
Nup153	723	0.00896332	0.0312819	-0.01148	0.0404649
Taf7	669	0.00903313	0.0314923	0.0476771	0.0715967
Bax	395	0.00944449	0.0328918	0.102319	-0.0510899
2010111I01Rik	396	0.00946084	0.0329142	0.104354	-0.235465
AI413582	399	0.00965862	0.033567	0.0661568	0.0521953
Frmd6	728	0.00980846	0.034052	-0.0664343	0.0405744
Plekhm2	730	0.0100515	0.0348591	-0.0300691	0.0385046
Cdkn2b	401	0.0100819	0.034928	0.0598635	0.0361279
Cdv3	459	0.0101065	0.0349401	0.0780399	0.0745793
Lurap1	402	0.0100988	0.0349401	0.0339294	-0.00872558
Gigyf1	403	0.0103437	0.0357229	0.0288012	0.0164939
Nfil3	732	0.0103963	0.0358672	0.00872475	0.0241743
Dlgap4	733	0.0104716	0.0360894	0.0331008	0.0691027
Rhoq	733	0.0105775	0.0364166	0.0457588	0.0658813
Inafm1	736	0.010694	0.0367792	0.0236508	0.0397659
Hist3h2a	404	0.0107401	0.0368998	0.0315097	-0.0299405
Atg14	737	0.0107719	0.0369705	0.0214531	0.0333066
Cbx6	738	0.0108023	0.0370363	0.00860054	0.0179398
Klk6	406	0.0108573	0.0371866	0.106412	-0.112966
Erich1	407	0.0109151	0.0373457	0.0368085	0.0228506
Nes	739	0.0109865	0.0375515	0.0329162	0.0852885
Fbxw4	411	0.0112098	0.0382751	0.0509313	0.0175659
Ipo5	740	0.0112325	0.0383131	-0.00501158	0.0550698
Il4ra	742	0.0115109	0.039198	-0.0146569	0.0497627
Efna1	743	0.0115156	0.039198	-0.0152184	0.0500309
Ly6d	692	0.0116844	0.0397318	0.0460137	0.0704706
Mbd1	415	0.0118012	0.0400878	0.0577543	0.0372972
Plod2	745	0.0119354	0.0405023	0.00878276	0.020753
Bahcc1	746	0.0120795	0.0409493	0.00170338	0.0134054
Foxj3	747	0.0121397	0.0411113	-0.00181746	0.0349578
Lims1	419	0.0122486	0.0414377	0.0766508	0.055435
Cdca8	420	0.0122723	0.0414755	0.0199559	-0.0921447
Prpf39	639	0.0122959	0.0415127	0.0313914	0.0420244
Map3k20	749	0.0123147	0.0415339	-0.00661583	0.0411949
Ccdc102a	750	0.0123831	0.0417221	-0.0051142	0.0249071
Arl6ip1	422	0.012534	0.0421877	0.0783541	0.00376126
Prkg2	687	0.0125701	0.0422661	0.0149201	0.021219
Tbcb	424	0.0126348	0.0422895	0.0725501	-0.185747
Ccdc112	619	0.0126178	0.0422895	0.0289414	0.0394594
Calml3	423	0.0126188	0.0422895	0.0216684	0.00606872
Cutal	756	0.0126409	0.0422895	0.00996744	0.0250399
Gfod1	753	0.0126153	0.0422895	-0.0102908	0.025785
Krt17	747	0.012691	0.042408	0.0344821	0.0506713
Fcgrt	758	0.0127019	0.042408	-0.0295743	0.0228085
Gpr137b	479	0.0128903	0.04298	0.0257046	0.0252881
Nedd4l	760	0.0128992	0.04298	-0.047033	0.0599546
Car2	761	0.0129206	0.0430079	-0.482798	0.183225
Cracr2b	426	0.0132013	0.0438982	0.0669541	-0.124571
Ptpn14	762	0.0132359	0.0439693	0.00831122	0.021495
Gpr160	487	0.0132555	0.0439902	0.0389992	0.0330766
Zcchc6	763	0.0133047	0.0441092	0.0253902	0.0687773
Bcl2l1	429	0.0133353	0.0441667	0.0625533	0.00909386
Clca2	430	0.0134293	0.0444335	0.0264299	-0.122853
Fam110c	765	0.0134514	0.0444622	-0.00958845	0.0391326
Tnrc6b	440	0.0135925	0.0448838	0.0431012	0.0384785
Klhl25	431	0.0137011	0.0451974	0.0478159	0.0262011
Stom	766	0.0139903	0.0461054	0.00852706	0.028396
Znrf1	767	0.0140263	0.0461782	-0.0554722	0.070386
Tnk1	768	0.014051	0.0462134	0.016252	0.0532298
Ric1	769	0.0141806	0.0465934	0.0112954	0.0272776
Jund	496	0.0144927	0.0475718	0.102122	0.0988088
Tnk2	771	0.0147585	0.0483962	-0.119115	0.064875
Mindy2	434	0.0148627	0.0486417	0.0508639	0.029311
Diaph1	772	0.0148581	0.0486417	-0.0115692	0.0638346
Skil	774	0.0150969	0.0493594	0.0171005	0.0630406
Vps4b	658	0.0151763	0.04957	0.0549306	0.0724797
Rwdd1	436	0.0152151	0.0496477	0.0766325	-0.320233
Mrpl30	437	0.0152774	0.0497943	0.0795372	-0.181524
Pithd1	776	0.0152901	0.0497943	0.03234	0.0618619
Gm19510	777	0.0153933	0.0500812	-0.0170914	0.0266914
Lcp1	438	0.0154342	0.0501648	0.0209077	0.00170518
Herpud1	439	0.0156571	0.0508395	0.0686111	-0.112271
Uap1l1	779	0.0157193	0.0509913	0.013768	0.0447665
Akap9	441	0.0159826	0.0517948	0.0716236	0.0492085
Rrs1	781	0.0162029	0.0524574	-0.101893	0.0548572
Rhpn2	444	0.0163798	0.0529783	0.0577662	0.0430027
Sh2d4a	782	0.0164249	0.0530725	-0.0850587	0.0426576
Hebp1	445	0.0166739	0.0537739	0.0571076	-0.0538339
Rmdn3	783	0.0166744	0.0537739	-0.0225978	0.0578485
Gm20442	446	0.0167713	0.0540336	0.0181019	0.00653587
Tubb2a	785	0.0168856	0.054349	0.0679162	0.130338
Celsr2	447	0.0169094	0.0543728	0.0584443	-0.0610672
Itpk1	448	0.0170351	0.0547237	0.0319877	0.00932844
Borcs6	571	0.017233	0.0552525	0.038038	0.0406763
Cdc20	450	0.017222	0.0552525	0.0177268	-0.0613938
Rnf128	452	0.0172868	0.0553643	0.0507289	-0.00959978
Swt1	788	0.0173181	0.0553643	0.0301213	0.0475512
Mlf1	787	0.0173042	0.0553643	0.0087479	0.0581153
Man2a1	789	0.0176686	0.0564306	-0.0221232	0.0361205
Pcf11	790	0.0178035	0.0568065	-0.0262421	0.0432142
Bach1	791	0.0181248	0.057776	-0.0154464	0.0428236
Dusp3	792	0.01816	0.0578327	-0.00295408	0.0370577
Clu	793	0.0182156	0.057954	-0.713541	0.0995638
Arhgap23	794	0.0185657	0.0590111	0.00126038	0.0326789
Heca	795	0.0185893	0.0590295	0.0184419	0.0330082
Duoxa1	454	0.0187902	0.0596104	0.0217186	-0.0781519
Gtpbp4	797	0.0188464	0.0597313	-0.0050808	0.0715435
Gbe1	798	0.0188871	0.0598031	-0.0105287	0.0265831
Cmpk2	456	0.019052	0.0602678	0.0337559	0.0013196
Egln3	457	0.019097	0.0602947	0.09506	-0.0218854
Ptger4	740	0.0190857	0.0602947	0.026311	0.0385047
Mgarp	600	0.019459	0.0613793	0.0117107	0.0142672
Phlda3	527	0.0195231	0.0614912	0.0879334	0.0839132
Aebp2	802	0.0195316	0.0614912	0.0232149	0.0436017
Eepd1	803	0.0195606	0.061524	-0.0116253	0.0141465
Rell1	495	0.0197169	0.0618978	0.0540116	0.0484144
Slpi	804	0.0197001	0.0618978	-0.762878	0.126821
Chchd10	458	0.0198459	0.0622439	0.0748916	-0.375432
Gsn	805	0.0199034	0.0623652	-0.00440018	0.058599
Cdk12	806	0.0200898	0.0628898	0.0271802	0.0547877
Me1	460	0.0202757	0.063412	0.0802804	0.0124857
Zfp36l2	808	0.020324	0.063503	0.0307213	0.0889961
Ehd2	810	0.020999	0.06555	-0.0210255	0.0448323
Ogfr	462	0.0210667	0.0656405	0.0675623	-0.00195397
Rassf3	463	0.0210676	0.0656405	0.0345866	-0.0129587
Chd4	464	0.0211032	0.065689	0.08071	0.0733809
Smap2	812	0.0211228	0.065689	-0.0181127	0.0461712
Rictor	732	0.0211722	0.0657808	0.0248704	0.0354392
Cspg5	468	0.021769	0.0675457	0.0186756	0.00585893
Inf2	814	0.021781	0.0675457	-0.00124907	0.0282065
Pcdh1	815	0.0219291	0.0679412	0.0124833	0.0475493
Tspan5	816	0.0221192	0.068466	-0.0404747	0.043149
Uba5	469	0.022206	0.0686707	0.0586627	0.0345612
Akr1b8	470	0.0222321	0.0686872	0.0227223	0.00494273
Cdc42ep1	818	0.0223901	0.0691108	0.0285359	0.0447293
Smpdl3a	471	0.0227211	0.0700672	0.0315992	0.00388
Krt19	472	0.0230182	0.0709174	0.184301	-0.116703
E2f5	819	0.0230493	0.0709474	0.0178753	0.0397914
Ehbp1l1	820	0.0230825	0.0709835	0.00658581	0.0238283
Mapre3	821	0.0231844	0.0712306	-0.0135797	0.027698
Tcaf1	473	0.0232923	0.0714958	0.0527219	0.00701753
Srcin1	562	0.0237925	0.0729636	0.0138437	0.0133681
Endod1	822	0.0239144	0.0732696	-0.0281043	0.0333413
Mt2	474	0.0239546	0.073325	0.0650041	-0.130558
Pxylp1	475	0.0241846	0.0738924	0.0191214	0.0125909
Gan	823	0.0241786	0.0738924	0.0176388	0.0338593
Pex5	825	0.0243576	0.0743524	-0.0191661	0.0379686
Ssbp2	826	0.0244386	0.0745309	-0.0126531	0.0177414
Bcr	827	0.024469	0.0745552	-0.000939667	0.0463095
Uba6	828	0.0245759	0.074812	-0.00246145	0.0339028
Sdcbp2	829	0.0246393	0.0749362	-0.036856	0.0343704
Ddit4	476	0.0248354	0.0754632	0.0651121	-0.220479
Ecm1	830	0.0248665	0.0754883	-0.0975517	0.0453927
Ptbp3	625	0.0249595	0.0756321	0.0584304	0.0771421
Pcgf5	831	0.0249451	0.0756321	-0.00752619	0.0443769
Mcts2	485	0.0251511	0.076143	0.0156795	0.0150922
Phactr4	833	0.0252731	0.0764424	-0.0264567	0.0445922
Nrbp2	620	0.0253211	0.0765177	0.0312752	0.0355376
Itgb3	480	0.0253572	0.076557	0.0201057	0.00857458
Dynll2	482	0.025522	0.0769143	0.0691489	-0.0881135
Bspry	481	0.0255174	0.0769143	0.0684165	-0.0830668
Vwa1	483	0.0258467	0.0778221	0.0478228	0.0338208
Prdm1	837	0.0259976	0.0782054	0.0020407	0.0114093
Ubl4a	486	0.0264494	0.0794923	0.0684668	-0.179675
Tomm5	488	0.0267931	0.0803806	0.0789146	-0.0573394
Rab20	839	0.0267935	0.0803806	-0.0638086	0.0334241
Lrrc8a	569	0.0270402	0.0810472	0.045935	0.0418407
Tcf7l2	489	0.0272078	0.0814757	0.0500443	0.0219177
Mfap3l	490	0.027406	0.0819953	0.035868	0.022796
Herc6	665	0.0277531	0.0829589	0.0206475	0.0262479
Pdcd7	842	0.027845	0.0831583	0.00878653	0.0337464
Dpm2	491	0.0280656	0.0837086	0.0523441	-0.00665901
Frat2	580	0.0280798	0.0837086	0.0288065	0.0285374
Txnrd1	843	0.0282489	0.084137	-0.202849	0.0876974
Hist1h2ac	492	0.0283767	0.0844418	0.0266161	6.45386e-05
Chit1	493	0.0285011	0.0847357	0.0128119	0.00378071
Il11	844	0.0286206	0.0850148	0.00381732	0.0154968
Ly6a	498	0.0290545	0.0862264	0.0695617	0.00419112
Npnt	499	0.0291171	0.0863346	0.0568558	-0.0288462
Trip6	502	0.0296754	0.0878632	0.0705995	0.0485871
Bbx	848	0.0296857	0.0878632	0.00208439	0.0523767
Samd12	566	0.0301239	0.0890806	0.030013	0.024155
Mgam	504	0.0301673	0.0891295	0.0184272	-0.00512189
Jade1	505	0.0302375	0.0892571	0.0288122	-0.0544893
Slc6a8	849	0.0303618	0.0895443	-0.00904121	0.042539
Zfp703	507	0.0306402	0.0902851	0.071123	0.0482522
Gse1	536	0.0307609	0.0905601	0.0308543	0.0286379
Itih4	853	0.0311749	0.0916974	0.00706975	0.0150592
Carhsp1	510	0.0312302	0.0917786	0.0675499	-0.0210947
Nek7	512	0.0312781	0.0918378	0.0485311	0.00539044
Atp2b1	513	0.0313093	0.0918479	0.0926302	-0.0941631
Mknk2	514	0.0313482	0.0918808	0.0338697	0.00419528
Plec	515	0.0314598	0.0920758	0.0754207	-0.00793691
Lama5	516	0.0314703	0.0920758	0.045689	0.0108477
Smarca5	855	0.0315504	0.0922286	-0.0454366	0.0590099
6430548M08Rik	541	0.0316273	0.0923719	0.027111	0.0241271
Tgfbr2	856	0.031701	0.0925055	-0.0484375	0.0441639
Lpin2	857	0.0318446	0.0928428	-0.0382633	0.0396063
2310057J18Rik	518	0.0321646	0.0936933	0.0443046	-0.0611385
Sh3rf1	521	0.0323416	0.0941259	0.0225194	0.0168695
Abcc1	859	0.0325277	0.0945844	-0.00300015	0.0220964
Auts2	860	0.0327281	0.0950836	-0.0255132	0.0673726
Sik2	861	0.0327967	0.0951997	-0.007365	0.0261441
Akap12	557	0.03317	0.0961147	0.0376843	0.0359123
Spsb3	862	0.0331557	0.0961147	-0.040812	0.0406545
Mrpl58	524	0.033275	0.0963345	0.072741	-0.424919
Xpc	525	0.0335843	0.0971452	0.0260623	0.0108653
Tk1	526	0.0337211	0.0974557	0.0231936	-0.236058
Il17ra	863	0.033984	0.0981298	-0.0155321	0.0244747
Scin	864	0.0340837	0.0983319	-0.0264646	0.0266229
Fam220a	624	0.0341168	0.0983418	0.0675997	0.0795835
H2-Q6	865	0.0342187	0.09855	-0.0105418	0.0439094
Mrpl34	528	0.0343896	0.098956	0.0451153	-0.350142
2610037D02Rik	866	0.0345294	0.099272	0.000500465	0.026602
Ypel2	530	0.0346122	0.0994238	0.0157223	0.00907596
Zc3hav1	867	0.0346857	0.0995486	0.0214894	0.041978
Ascc3	659	0.0348572	0.0999543	0.0418037	0.0483988
Arl5b	531	0.0349924	0.100255	0.0367391	0.0234432
Kifc3	869	0.0351901	0.100734	-0.114848	0.0383118
Kdm3a	632	0.0353742	0.101174	0.0302913	0.0280231
Rnd3	637	0.0361294	0.103245	0.0423971	0.0465276
Chpf2	709	0.036262	0.103534	0.0247275	0.0320252
Eea1	871	0.0363798	0.103781	-0.1103	0.0519863
Metrnl	532	0.0366435	0.104444	0.0527271	0.0346213
Ubr2	872	0.0369093	0.105111	-0.0189644	0.0368248
Cobll1	873	0.0373308	0.10622	-0.0511734	0.0425128
Pfkl	534	0.0375751	0.106731	0.0635837	-0.161432
Il13ra1	874	0.0375518	0.106731	-0.0442402	0.0396782
Rel	875	0.037675	0.106923	0.000476248	0.023891
Tmem41b	535	0.0377215	0.106964	0.0515752	0.0140622
Mdk	876	0.0378878	0.107343	0.00443685	0.0106663
Gpbp1l1	756	0.037945	0.107413	0.0325048	0.0390187
Cyth3	879	0.0380751	0.10769	-0.00494802	0.0319855
Usp2	880	0.0382203	0.108008	0.00764353	0.0252345
Casc1	537	0.0385151	0.108749	0.0153134	0.0144701
Ubxn7	820	0.0386542	0.109048	0.0215013	0.0261925
Rab11fip5	882	0.0387071	0.109105	0.0183639	0.0508251
Ppp1r10	884	0.0391811	0.110347	0.00706421	0.0392837
Sorbs2	538	0.0392977	0.110581	0.0503247	-0.122512
Arl13b	885	0.0394193	0.110829	-0.0386233	0.0489732
Fdft1	548	0.0394582	0.110844	0.0339368	0.0275117
Retreg1	887	0.0396937	0.111411	0.0265931	0.0515664
Nub1	559	0.0399967	0.112135	0.0450717	0.0395647
Csrp2	540	0.0400192	0.112135	0.0236017	0.0140596
Tshz1	664	0.0407449	0.114072	0.0238532	0.027268
Fkrp	891	0.0409893	0.114659	-0.0177963	0.0255952
Csn2	544	0.0411515	0.115016	0.0860254	-0.663023
Rev1	697	0.0414897	0.115863	0.0236836	0.0249664
Abhd5	546	0.0416619	0.116246	0.0705456	-0.236375
Tspan1	547	0.0424275	0.118283	0.0159804	-0.0682827
Cblb	893	0.0424907	0.118359	0.0143054	0.0248831
Fgf1	894	0.0428705	0.119317	-0.0365088	0.0240015
Klf2	582	0.0431397	0.119965	0.042484	0.0393311
Smurf1	673	0.043265	0.120213	0.0334666	0.0381884
Cdk4	549	0.0433548	0.120361	0.0636399	-0.421271
Lonrf3	762	0.0436089	0.120943	0.012142	0.015544
Sgsm3	897	0.0436372	0.120943	-0.0083677	0.032152
Dcp1b	674	0.0436994	0.121014	0.0113353	0.0107315
Tex30	550	0.0437716	0.121112	0.0464459	0.0342412
Fam13a	552	0.044011	0.121673	0.0180427	-0.017682
Samd4	898	0.0440613	0.12171	-0.0133271	0.0101622
Ugp2	553	0.0443622	0.122419	0.0508926	0.0205214
Pxmp4	554	0.0443918	0.122419	0.0405883	-0.0901019
Sumo3	555	0.044503	0.122611	0.0642171	-0.244752
Tmem251	899	0.0445354	0.122611	-0.0862143	0.0404839
Diaph2	901	0.0450616	0.123957	0.00481803	0.0208131
Krr1	904	0.0460762	0.126643	-0.0168509	0.0300578
Cd164l2	906	0.04727	0.129816	-0.00714046	0.0379076
Cdkn2a	561	0.0473575	0.129949	0.0592857	0.0202713
Fam208b	907	0.0474532	0.130103	0.00545285	0.0258409
Clint1	564	0.0476325	0.130192	0.0593998	-0.0178253
Dnajc19	565	0.0476428	0.130192	0.0510073	-0.221879
Ar	563	0.0475979	0.130192	0.0260407	0.00729284
Cd3eap	909	0.0475263	0.130192	-0.0693283	0.0504667
Helz	787	0.0477432	0.130359	0.0287608	0.0381181
Fhad1	690	0.0477995	0.130405	0.0135362	0.0116376
Uap1	911	0.0478819	0.130522	-0.0525008	0.0541024
Rgr	912	0.0480453	0.13086	0.00703022	0.0119411
Prag1	913	0.0482313	0.131259	-0.118624	0.0340559
Trp53bp2	914	0.0483297	0.131419	0.00159658	0.0406626
Rnf181	567	0.0484964	0.131656	0.040221	-0.00726453
Socs3	915	0.0484707	0.131656	-0.158218	0.0364385
Tsr1	916	0.0485799	0.131774	-0.0291701	0.0319898
Usp18	657	0.0487071	0.132011	0.0428544	0.0516588
Tfrc	568	0.0487899	0.132128	0.0236254	-0.00427536
Dynap	712	0.0491078	0.132771	0.0157171	0.0188413
Pgm1	917	0.0491033	0.132771	-0.0625005	0.0259028
Zfhx3	570	0.049755	0.134193	0.0258848	-0.0270345
Sipa1l1	744	0.0496987	0.134193	0.0237209	0.0280285
Cntrl	920	0.0497475	0.134193	0.0088436	0.0185269
Wdr44	921	0.0499231	0.134537	0.0129126	0.0342579
Gm527	922	0.050078	0.134844	0.0117658	0.0202848
Tbc1d15	924	0.0505285	0.135947	-0.0110592	0.034512
Zfp429	925	0.0506332	0.136118	-0.00312223	0.0223701
Slitrk4	572	0.0508479	0.136584	0.0190604	0.0099589
Agpat5	927	0.0512631	0.137476	0.0190599	0.0318312
Spire1	926	0.0512454	0.137476	-0.00681277	0.0273793
Utrn	573	0.0518067	0.138822	0.0334639	0.0230508
Pkp2	929	0.0523744	0.14023	0.0112567	0.0444594
Prkcg	711	0.052505	0.140466	0.0111737	0.0112462
Sh3bp4	931	0.0527234	0.140917	0.017873	0.0297562
Sprr1a	932	0.0527589	0.140917	0.0015301	0.0330371
Esf1	933	0.0530091	0.141472	-0.0390778	0.0508942
Star	934	0.0533226	0.142194	-0.00194639	0.00853767
Tec	935	0.0534964	0.142542	-0.0106109	0.023829
Yae1d1	936	0.0537829	0.143191	-0.0333823	0.0421311
Pgs1	577	0.0542864	0.144415	0.0709021	0.0236693
Pgd	578	0.0546837	0.145355	0.0642078	-0.0728822
Tma16	938	0.0547657	0.145456	-0.0069474	0.0366282
Gm26670	719	0.0548479	0.145558	0.0103512	0.011469
Atp10a	939	0.0549095	0.145605	-0.0205565	0.0132778
Gbp7	579	0.0551877	0.146225	0.020017	-0.0161583
Chrnb1	940	0.0552718	0.146331	-0.0566641	0.0221757
Gt(ROSA)26Sor	941	0.0553299	0.146368	-0.00562607	0.0352867
Ythdc1	943	0.0559265	0.147828	-0.0284543	0.0533845
Apol9a	581	0.0562157	0.148474	0.0579994	0.0181865
Zfp131	944	0.0562694	0.148498	-0.0159181	0.0442383
Phf11d	945	0.0565993	0.149249	0.00674491	0.0589056
Med26	946	0.0566779	0.149337	0.00201295	0.0208756
Grwd1	947	0.0567843	0.149499	-0.0357585	0.0395224
Cgn	583	0.0570055	0.149962	0.0405028	0.0246277
Prrg4	584	0.0573957	0.150869	0.040154	0.00310065
Epb41l4a	585	0.0574643	0.150929	0.0544042	-0.260602
Lmnb1	587	0.0578845	0.151792	0.029043	-0.00665256
Arhgap5	950	0.0578481	0.151792	0.0198541	0.0602913
Chmp6	589	0.058055	0.151999	0.0614965	-0.286035
Pcyt2	588	0.0580376	0.151999	0.0382678	-0.0909571
Mturn	590	0.0582117	0.152058	0.0235701	0.0185701
Fam212b	952	0.0582153	0.152058	0.0113249	0.0306282
Arhgap31	951	0.0581629	0.152058	0.000921305	0.0296904
Ten1	592	0.0583921	0.152399	0.0620022	-0.240329
Bod1l	593	0.0585479	0.152686	0.0479196	0.00124534
Mup5	594	0.0587704	0.153025	0.0203709	0.0130806
Dclk2	953	0.0587324	0.153025	-0.00204568	0.0138541
BC100530	660	0.0590625	0.153665	0.0371887	0.0321391
Zfp281	954	0.0593411	0.154268	0.00637261	0.0283007
Tesc	597	0.0597047	0.155092	0.0156818	-0.00683444
Asb6	956	0.0606921	0.157533	-0.0280746	0.0309635
Kdsr	958	0.0611224	0.158526	-0.0350771	0.0281777
Cnot6l	960	0.0612902	0.158836	0.00768113	0.032852
4430402I18Rik	601	0.0613898	0.15897	0.043178	0.0128059
Psme2	602	0.0616144	0.159356	0.0707963	-0.420126
A530032D15Rik	603	0.061635	0.159356	0.018339	0.00683955
Elovl7	917	0.0618808	0.159867	0.0320666	0.0440185
Scd2	604	0.0619922	0.159933	0.0336547	-0.0381227
Atxn1	964	0.0620029	0.159933	0.0128725	0.048565
Ripk4	965	0.0624289	0.160906	-0.020554	0.0302067
Fam57a	605	0.0628945	0.16198	0.0292315	-0.00834812
Pdzk1ip1	606	0.0630665	0.162209	0.0282555	0.0222856
Tmem40	966	0.0631213	0.162209	-0.00846676	0.0321361
Zfp469	967	0.0631303	0.162209	-0.0139718	0.010524
Hsd17b2	608	0.0632413	0.162368	0.0200172	0.00621403
Ppdpf	609	0.0634865	0.162872	0.0602773	-0.24458
Sptan1	610	0.0636546	0.163177	0.0496296	0.0244523
Ccnb2	612	0.0646131	0.165506	0.00925551	-0.0786824
Kif21a	613	0.0646939	0.165584	0.0423279	-0.0688084
Pdap1	614	0.0650418	0.166346	0.0579473	-0.351013
Adrb2	615	0.0650969	0.166359	0.0198991	0.00734549
Smim14	616	0.0654361	0.167097	0.0607947	-0.0909876
Tmcc1	970	0.065861	0.168052	0.00352116	0.0341786
Lxn	617	0.0666534	0.169682	0.0538828	-0.186942
Ptpn18	973	0.0666297	0.169682	-0.0288725	0.0421261
Gdpd2	972	0.0666158	0.169682	-0.0839797	0.0168373
Tcf4	759	0.0667316	0.16975	0.0233737	0.023654
Nfic	618	0.0668621	0.169952	0.0329353	-0.0344456
Slc12a2	622	0.0678148	0.172241	0.0384376	-0.0438916
Bace2	974	0.0678807	0.172276	-0.0363411	0.0362475
Irf5	975	0.0679612	0.172349	-0.00724354	0.00899119
Slc31a2	623	0.0681929	0.172804	0.039762	-0.0659056
Pdgfb	977	0.0684786	0.173395	-0.00809775	0.0124943
Slc1a1	626	0.0688511	0.174206	0.0330406	0.0184826
Slc25a33	971	0.068938	0.174292	0.0203091	0.0333011
Prickle3	979	0.0690906	0.174545	-0.00349851	0.0123547
Klk10	627	0.0691787	0.174634	0.164819	-0.765449
Comt	629	0.0695526	0.175444	0.0569666	-0.0780567
Ifnar2	980	0.0701006	0.176692	-0.0934069	0.0387923
Chka	633	0.0708817	0.178525	0.0494518	0.000400999
Pcdh17	982	0.07131	0.179467	-0.0164017	0.0145154
Ggt1	634	0.071407	0.179575	0.0206847	-0.0164352
Qser1	635	0.0720181	0.180974	0.0296155	-0.000205208
Gsdme	985	0.0722152	0.181195	-0.0021996	0.0146261
Large1	984	0.0721961	0.181195	-0.0333833	0.0194716
Ucp2	638	0.072755	0.182411	0.0698655	-0.309055
Upf2	988	0.072865	0.182548	0.00644923	0.031284
Rps6ka4	989	0.0730335	0.182739	0.0149732	0.0291011
Tef	939	0.0730513	0.182739	0.00755697	0.0111657
Chd2	641	0.0732123	0.182984	0.0373361	-0.011043
Marveld2	642	0.0732599	0.182984	0.0358085	0.00231752
Sytl1	644	0.0736575	0.1837	0.0275692	-0.011531
Plekhh1	643	0.0736051	0.1837	0.0158994	0.00926461
Gm45589	645	0.0742253	0.184977	0.0216409	-0.00664119
Slc25a37	993	0.0749158	0.186417	0.00225813	0.0193785
Etv3	992	0.0748873	0.186417	-0.0273639	0.0281846
AU018091	995	0.0753475	0.187351	0.00573098	0.00943153
Efna5	996	0.0755652	0.187751	-0.0579999	0.0223759
Prim2	646	0.0762026	0.189193	0.0186746	-0.0387473
Gpx1	647	0.0762923	0.189273	0.0813046	-0.335641
Fat1	650	0.076497	0.189356	0.0422323	0.0149734
Palmd	649	0.0764882	0.189356	0.0280281	-0.111952
Fam43a	648	0.0764585	0.189356	0.0189782	0.00114212
Irgm2	651	0.0765908	0.189446	0.0125568	-0.00764889
Apol7a	652	0.0767711	0.189751	0.0381075	-0.0102649
Extl3	795	0.0768493	0.189802	0.0180176	0.0205466
Rfc1	654	0.0769916	0.190012	0.0281238	-0.0790712
Grhpr	655	0.0775238	0.191082	0.0444913	-0.152937
Nr1d1	1000	0.0775407	0.191082	-0.0100202	0.0150157
Snx17	1002	0.0787902	0.194017	0.0182898	0.0794001
Fam50a	661	0.0797731	0.196292	0.0380866	-0.0346666
Nsd3	1006	0.0801979	0.19719	0.0242803	0.0374265
Rtn2	806	0.0807091	0.19825	0.00726044	0.00849214
Krit1	1007	0.0807487	0.19825	-0.00270914	0.0438563
Col11a1	662	0.0808612	0.19838	0.0339398	-0.133726
Hpcal1	663	0.0814643	0.199564	0.0366294	-0.000529886
Atp1b1	1004	0.0814564	0.199564	0.0317105	0.0560713
Tacc3	666	0.0815525	0.199632	0.0102724	-0.0517766
Myh14	808	0.0820953	0.200812	0.036513	0.0349564
Ifi207	1009	0.0828981	0.202626	-0.000388635	0.0105671
Anxa8	1010	0.0832377	0.203306	-0.0217409	0.0149377
Pld3	1011	0.0835185	0.203842	-0.0443101	0.0456689
Ccdc107	1012	0.0838146	0.204414	-0.0511555	0.0456156
Unc5b	1013	0.084065	0.204874	-0.00275569	0.0195864
S100a7a	1014	0.0842317	0.205129	-0.000189034	0.0149649
Ccng1	668	0.0849103	0.20663	0.0472166	0.00252402
Tanc2	671	0.0860227	0.209183	0.0428573	0.00445196
Tsen15	672	0.0861237	0.209275	0.0228544	0.00899575
Ifitm10	1016	0.0863387	0.209643	-0.0183639	0.0142315
Plekhg3	1017	0.0864639	0.209794	-0.0107944	0.0304243
2700097O09Rik	675	0.0877934	0.212864	0.0253297	0.00376488
Gm4117	676	0.0880541	0.213116	0.0128937	0.00392178
Fosb	1020	0.0880707	0.213116	0.000318509	0.0412348
Slc16a2	1021	0.0880907	0.213116	-0.0342661	0.0319356
Zmym5	1023	0.0892846	0.215847	0.0118688	0.0415873
Phlda2	1024	0.0898319	0.217012	-0.018483	0.0161176
Angptl4	1025	0.0899735	0.217195	0.00306648	0.0163373
Dyrk1a	1027	0.0901476	0.217299	-0.00526125	0.0261078
Sag	1026	0.0900937	0.217299	-0.00556215	0.0104587
Trio	1028	0.0902395	0.217362	-0.00583973	0.0308369
Stap2	677	0.0904045	0.217602	0.0493143	-0.00996587
Dcpp1	679	0.0905546	0.217805	0.0314208	-0.210107
Slc11a2	1029	0.0909661	0.218636	-0.0515473	0.0269153
Nfe2l3	680	0.0911446	0.218906	0.0182315	-0.00582333
Unc13d	681	0.0912169	0.218921	0.0242643	0.0120463
Pdrg1	1030	0.0912969	0.218954	0.0192052	0.0565517
Ccng2	684	0.0916811	0.219716	0.0316421	0.00055152
Rbp7	685	0.0921258	0.220463	0.0665355	-0.954457
Sybu	1032	0.0921204	0.220463	-0.0221437	0.01906
Med13l	1033	0.0925703	0.221367	-0.0320218	0.0308807
Wnt5b	1034	0.0933836	0.22315	-0.382238	0.0565529
Ccne1	686	0.0935297	0.223338	0.00936835	-0.0119307
Apol9b	847	0.0943405	0.225112	0.0316518	0.0321419
Siva1	688	0.0949947	0.22651	0.0440362	-0.243233
S100a3	689	0.095209	0.226858	0.0246229	0.00553818
Timp2	1035	0.0958615	0.228248	-0.514426	0.0401077
Cep83	1036	0.0959818	0.228371	-0.0550235	0.0351208
Col9a2	853	0.0965204	0.229487	0.0343742	0.0321044
Plat	1037	0.0967335	0.229829	-0.144987	0.0350061
Rps6ka5	913	0.097333	0.231087	0.0108301	0.0131489
Nhsl1	693	0.097659	0.231695	0.0284878	-0.0371039
Ldhb	694	0.0980065	0.232288	0.0511674	-0.226053
Tmem158	1040	0.0980491	0.232288	-0.0322348	0.0205451
Apobr	696	0.0985845	0.233276	0.0355412	-0.0201194
Rnasel	1041	0.0986071	0.233276	-0.0645799	0.0543085
Btc	698	0.0989896	0.234014	0.0171134	-0.0217114
Gbp9	1042	0.0996157	0.235326	0.00687602	0.0209013
Ss18l2	700	0.0999978	0.23606	0.0386047	-0.225088
Mvp	1043	0.100249	0.236485	0.0262909	0.0405673
Xaf1	701	0.100402	0.236677	0.0453026	0.0220594
Znfx1	1044	0.100557	0.236875	-0.000311332	0.0245829
Gmppb	702	0.100697	0.237011	0.0245065	-0.0343377
Chd9	1045	0.100758	0.237011	-0.044562	0.0304457
Fasn	703	0.101382	0.237972	0.0431165	-0.177792
Ddah2	1048	0.101362	0.237972	-0.00663539	0.0169893
Ltbp2	1047	0.101306	0.237972	-0.021308	0.0135639
Abhd17a	704	0.102509	0.240446	0.0527799	-0.104843
Tpm2	705	0.10267	0.240576	0.0145465	0.0112106
Clcf1	1049	0.10271	0.240576	-0.0592824	0.0195171
Plekha5	722	0.103062	0.241163	0.0231781	0.0163819
Ptk2b	1050	0.103106	0.241163	-0.00427262	0.0145649
AC168977.2	706	0.103381	0.241636	0.0120049	0.00638246
Krt16	708	0.103922	0.24248	0.029475	0.0216341
Dgat2	1052	0.103962	0.24248	0.0036365	0.0129975
Tor3a	1051	0.103904	0.24248	-0.0155865	0.0269479
Iqcb1	1053	0.104418	0.243373	-0.00290846	0.0168122
Chchd1	710	0.104493	0.243376	0.0537442	-0.345575
Pan3	888	0.105056	0.244515	0.0222091	0.0245595
Irx5	713	0.105268	0.244836	0.0559382	-0.026316
Kmt5a	714	0.105438	0.245061	0.0489864	-0.0299401
Oaz2	1057	0.105762	0.24564	-0.0982947	0.0404618
Stambpl1	716	0.107358	0.249172	0.0203759	-0.010529
Parp12	717	0.107562	0.249297	0.0234871	0.00649974
Sdc3	1058	0.107514	0.249297	-0.00311527	0.00765578
Atrn	1059	0.107798	0.24967	0.00423494	0.0204194
Cdc37l1	912	0.108295	0.250644	0.0239716	0.035648
Ctss	1061	0.109072	0.252267	-0.0308173	0.0161407
Sf3b5	718	0.109198	0.252382	0.0452557	-0.362067
Jmjd6	1062	0.110076	0.254079	-0.0442915	0.0384896
Afap1	1063	0.110086	0.254079	-0.0824773	0.035004
Gadd45g	1064	0.110217	0.254204	-0.0420099	0.0502956
1810062O18Rik	741	0.110371	0.254384	0.00843432	0.00642138
Dynlt1f	721	0.110646	0.25484	0.0240873	-0.187118
Siah2	1065	0.110876	0.255192	0.0125584	0.0362821
Chd6	1066	0.111056	0.25543	0.00118354	0.024379
Hilpda	1067	0.111643	0.256602	-0.181556	0.0465201
Tead4	999	0.112312	0.257847	0.0274505	0.0383934
Dsp	1070	0.112341	0.257847	0.00783365	0.0236422
S1pr2	878	0.112604	0.258272	0.0229	0.0264474
Noa1	724	0.114302	0.26196	0.0202624	-0.0178764
Zfp326	1071	0.11437	0.26196	-0.0978346	0.0476572
Ddx24	1072	0.114664	0.262451	-0.0425664	0.0539914
Helz2	887	0.115184	0.26346	0.0114562	0.0184861
Cyb5a	726	0.116195	0.265588	0.0481601	-0.0832603
Arhgef6	1073	0.117887	0.269271	-0.111685	0.0359994
Armcx3	727	0.117994	0.269328	0.0361547	-0.0182338
Timm10b	728	0.118179	0.269565	0.0512816	-0.359987
Znrf2	1075	0.119095	0.271467	-0.00670578	0.0295561
Upf1	932	0.119239	0.271609	0.0191736	0.0242557
Kmt2e	729	0.119415	0.271823	0.0365815	-0.0296648
Slc17a5	757	0.119593	0.272041	0.0199496	0.014903
Slc26a10	1077	0.119831	0.272395	-0.00435259	0.0121116
Ankrd37	730	0.120019	0.272636	0.0114075	0.000652354
Kif5c	1080	0.121258	0.27526	-0.0058985	0.00946159
Shtn1	731	0.121415	0.27543	0.0218473	-0.0389675
Acsl4	734	0.12283	0.278448	0.0358713	-0.130929
Mme	1084	0.123088	0.278651	-0.0181258	0.00903147
Smg7	1083	0.123078	0.278651	-0.0269993	0.0205
Tubb2b	736	0.123554	0.27909	0.0620328	-0.060409
Dync1i2	737	0.123619	0.27909	0.0469245	-0.038107
Heg1	1085	0.12343	0.27909	0.00500749	0.0245562
Hspa2	1086	0.123559	0.27909	-0.00365365	0.022386
Kcnk1	738	0.124292	0.280386	0.0482646	-0.0601299
Brwd3	739	0.124362	0.280386	0.0186436	0.0017091
Traf1	1087	0.124687	0.280928	-0.00177682	0.00920772
Map2	1088	0.125077	0.281615	-0.00704797	0.0223378
Cd47	763	0.125465	0.282297	0.0438739	0.026568
Mettl7a1	1089	0.125664	0.282552	-0.0150646	0.0107896
Tango2	742	0.12657	0.284397	0.0181164	-0.0202078
Nfia	743	0.127091	0.285372	0.028801	-0.0705172
Pold4	1091	0.127257	0.285553	-0.0101621	0.0342956
Ntrk2	1092	0.127758	0.286473	-0.00573503	0.0116713
Glis2	1093	0.12784	0.286473	-0.00681728	0.0123919
Guca1a	745	0.129117	0.289139	0.0287359	0.0174281
Dcpp3	746	0.129661	0.29016	0.00757719	-0.0208003
Atp13a3	1096	0.1299	0.290498	0.00345731	0.037385
Nfyb	1005	0.130076	0.290695	0.0165457	0.0236903
Nhlrc3	919	0.130295	0.290792	0.0139551	0.0142615
N4bp1	1098	0.130265	0.290792	-0.0664083	0.0329125
Pnn	1099	0.130689	0.291476	-0.0242033	0.0380896
Pick1	750	0.131577	0.293259	0.0231957	0.00775955
Gm15446	751	0.13171	0.293305	0.0115323	0.00311376
Ldlr	1100	0.131775	0.293305	-0.00450144	0.0381285
Krcc1	755	0.133201	0.295684	0.0471926	-0.0968558
Dus1l	754	0.13308	0.295684	0.0405086	-0.281032
Ppm1d	753	0.133065	0.295684	0.0213858	0.0148424
Cavin3	769	0.13316	0.295684	0.00830039	0.00692658
Insig1	758	0.133376	0.295697	0.00889879	-0.000207715
Kif13b	1104	0.133385	0.295697	-0.00175658	0.0209602
Tceanc2	760	0.134317	0.297563	0.0109569	-0.000788745
Nsmf	1105	0.13468	0.298169	0.0108753	0.0298446
Mex3a	761	0.134829	0.298299	0.0311641	-0.0655499
Cpsf7	1106	0.135109	0.298718	-0.0130134	0.0204469
Irf9	883	0.136072	0.300648	0.0222935	0.0203974
Cyp2f2	764	0.13625	0.300839	0.0129005	-0.0236736
Bricd5	765	0.137785	0.304027	0.0471851	-0.179969
Gm26877	832	0.138898	0.306278	0.0177676	0.013394
Hspa4l	768	0.139614	0.307454	0.0276075	-0.00905871
Gm14286	1108	0.139617	0.307454	-0.00477476	0.00822269
AC125149.3	855	0.139838	0.307736	0.00806708	0.0103138
Ube2q2	1049	0.140118	0.308147	0.0167815	0.027845
Sox10	770	0.140799	0.309441	0.0322429	-0.0999719
Gm32914	1110	0.14102	0.309721	0.00287921	0.0128
Cd151	771	0.141271	0.309921	0.0453547	-0.0357738
Nr4a2	772	0.141298	0.309921	0.0204971	0.00860152
Ak4	773	0.14145	0.310049	0.0133931	0.00898098
Cyb5d2	942	0.141729	0.310455	0.00877535	0.0108685
Zfp750	774	0.141862	0.310541	0.0136834	-0.0647844
Susd6	1112	0.142804	0.312395	-0.0220976	0.0248865
Lncpint	1114	0.142899	0.312398	-0.141703	0.0164502
Nme5	946	0.144551	0.3158	0.0131	0.0160748
Nebl	1115	0.145201	0.31701	0.00757927	0.0200102
Smad1	779	0.14541	0.317129	0.0318336	-0.0426201
Ccdc138	950	0.145542	0.317129	0.00810802	0.0107551
Fst	1116	0.145534	0.317129	-0.113139	0.0283996
Ugdh	1117	0.145823	0.317532	0.00931524	0.0225144
Sh2d5	1118	0.146393	0.318563	0.00498796	0.0156248
Cnnm4	1119	0.146714	0.319052	0.000336511	0.0153713
Lsm4	781	0.146846	0.31913	0.0421559	-0.450789
Stk38l	954	0.147145	0.319571	0.0123221	0.016688
Sh2b2	1120	0.147399	0.319841	0.000101736	0.00729278
Rhou	1121	0.147463	0.319841	-0.0290454	0.0307782
Dcpp2	783	0.148835	0.322607	0.0110128	-0.0422854
Rrm2b	784	0.149244	0.323193	0.0196545	-0.0303967
Cenpf	785	0.149301	0.323193	0.0152771	-0.0605397
Klf4	788	0.149881	0.324237	0.0388832	0.00278436
Plp2	921	0.150187	0.324555	0.0387158	0.0252713
Abhd17c	789	0.150224	0.324555	0.0375663	-0.0240358
Arhgap1	1037	0.150603	0.325162	0.0201018	0.0295754
Oasl1	793	0.151707	0.327332	0.0208174	0.0135238
Zfp263	1124	0.151901	0.327537	-0.0058273	0.0193378
Prlr	794	0.152111	0.327775	0.0326158	-0.0439866
Ano1	796	0.153846	0.331299	0.0414177	-0.0968257
Elovl1	798	0.154298	0.331411	0.0480925	-0.0266906
Dhx58	797	0.154173	0.331411	0.0238665	0.00696232
9430038I01Rik	968	0.154096	0.331411	0.0185985	0.0195003
Acox3	1127	0.154198	0.331411	0.00421773	0.0108077
Ccl17	1129	0.154825	0.332111	0.00393909	0.00848428
Sash1	1128	0.15473	0.332111	-0.0305111	0.0321072
Ahnak2	973	0.155217	0.332736	0.0296044	0.0381988
Homer1	901	0.15604	0.334286	0.020801	0.0178434
Ifit3b	805	0.156849	0.335802	0.0195142	0.0151904
Pde4b	1134	0.158642	0.339419	-0.334797	0.0444708
4930523C07Rik	852	0.159838	0.341759	0.0160667	0.0125876
AA986860	804	0.160001	0.341887	0.0228439	-0.00027326
Hacd2	1136	0.160399	0.342515	-0.097714	0.037382
1700019L13Rik	1082	0.161267	0.344146	0.00466069	0.00813202
Ank	1138	0.162408	0.346359	-0.0283201	0.00880284
Tmem140	807	0.163364	0.348174	0.0107302	-0.00706483
Klhdc8b	1058	0.164136	0.349593	0.00555061	0.00819226
Zbtb38	870	0.164249	0.349609	0.0336083	0.0234877
Enah	937	0.164493	0.349903	0.00968076	0.00569119
Rnf122	810	0.165213	0.350984	0.0163091	5.65563e-05
Acer2	809	0.165177	0.350984	0.0157692	-0.032964
Mrpl17	811	0.166319	0.353107	0.0455802	-0.291527
Ttc3	813	0.168677	0.35739	0.0390868	-0.0611778
Ezh2	812	0.168517	0.35739	0.0233657	-0.0754296
Nfe2l2	1142	0.168768	0.35739	0.0117689	0.0341588
Acrbp	814	0.16874	0.35739	0.00743575	0.00020405
Rgcc	1143	0.16909	0.357845	-0.0110756	0.0133914
Tdp2	815	0.169453	0.358384	0.0248572	-0.0059046
Nrtn	817	0.170153	0.359635	0.0336848	-0.107513
Iffo2	821	0.171171	0.361556	0.0255835	0.00989658
AC127341.3	1144	0.171482	0.361982	-0.0309723	0.0144379
Dbn1	1012	0.172322	0.363522	0.0224026	0.0234868
Ilvbl	1145	0.172481	0.363626	-0.0140732	0.0194111
Furin	824	0.172679	0.363813	0.0313626	0.00818157
Insr	825	0.172899	0.364044	0.0170953	0.00647005
St3gal2	1146	0.173081	0.364195	-0.00308841	0.00930847
Daxx	827	0.173733	0.364871	0.0269176	-0.00525287
Thoc2	1147	0.173642	0.364871	0.00629154	0.0312562
Galm	1055	0.173842	0.364871	0.00410726	0.00658134
Plekhb2	1148	0.17377	0.364871	-0.0325078	0.0159438
Zfp296	829	0.174433	0.365878	0.0127599	-0.00347637
Fam221a	1151	0.174658	0.366118	-0.000192443	0.00908266
Zfp948	879	0.174887	0.366367	0.0149476	0.0112316
Cdkn3	830	0.175726	0.367892	0.00739624	-0.0454891
Fxyd2	1018	0.17584	0.367898	0.00969368	0.0105576
Cmtm3	903	0.176302	0.368399	0.0146124	0.0122468
Itga8	1020	0.17626	0.368399	0.0123153	0.0140098
A930015D03Rik	1027	0.177203	0.370048	0.00781586	0.00905202
6720427I07Rik	1028	0.177392	0.370209	0.00538164	0.00676879
Zbtb2	1153	0.177911	0.371059	-0.00405185	0.0156482
Polr2f	833	0.178129	0.37128	0.0457415	-0.333565
Slc39a13	1154	0.178493	0.371804	-0.0148711	0.0154269
Rab2b	1156	0.178932	0.372484	0.00468109	0.0134972
Gm31105	1034	0.179183	0.372773	0.00957755	0.0100544
Cyc1	834	0.180575	0.375434	0.0477417	-0.301613
Fnbp1l	1041	0.181141	0.375666	0.0249288	0.0337373
Rfc3	835	0.181009	0.375666	0.01442	-0.0655228
Ly6g6c	1040	0.181048	0.375666	0.00780515	0.00881939
Rai14	1157	0.180958	0.375666	-0.00962977	0.0185267
Atr	1044	0.18195	0.377107	0.00940129	0.0113093
Hmgn2	836	0.183569	0.380226	0.0352887	-0.310374
Tmem106a	838	0.184677	0.382281	0.0173333	-0.00927502
Ctnnb1	840	0.185254	0.382681	0.0472369	-0.00608255
Pkp3	1159	0.185133	0.382681	0.0207216	0.0345047
Prss53	1051	0.185286	0.382681	0.00906269	0.00999238
Tmem185b	1161	0.185332	0.382681	-0.0548355	0.019054
Top2a	841	0.186637	0.385016	0.00746464	-0.102796
Dtna	1162	0.186696	0.385016	-0.00669978	0.00764115
Ssna1	842	0.1871	0.385411	0.0414449	-0.259169
Trp53inp1	843	0.18712	0.385411	0.0222981	-0.000253206
Fam102b	844	0.18747	0.385891	0.0140353	0.00555128
Ephb4	845	0.187638	0.385998	0.0154448	-0.00570912
Dhx32	1163	0.187868	0.386232	-0.052393	0.0298137
Mtss1	848	0.189255	0.388841	0.0271705	-0.0931349
Slc35d1	1053	0.189555	0.389216	0.00724143	0.00861009
Samhd1	850	0.189847	0.389574	0.025367	-0.0216948
Hal	1165	0.190527	0.390728	-0.00354723	0.0144218
Ptpre	1166	0.191131	0.391725	-0.0571369	0.0203024
Prdx6	851	0.191409	0.391914	0.0430979	-0.196997
Schip1	1168	0.19146	0.391914	-0.00897992	0.00530848
Sox4	856	0.194055	0.396981	0.0657932	-0.344859
Arg2	1170	0.194955	0.398575	-0.0269728	0.0121948
Sox5	1171	0.195607	0.399662	0.00758287	0.0144318
Tnfrsf1a	857	0.195756	0.39972	0.0386567	0.00943409
Ahdc1	858	0.196022	0.400016	0.0182891	-0.00357257
Trak1	1011	0.196482	0.400461	0.0155698	0.0103675
Arhgef26	1172	0.196399	0.400461	-0.0032407	0.0188817
Sema4d	1174	0.197978	0.403262	0.000963189	0.0157692
Eda2r	938	0.198511	0.404098	0.0125297	0.0100222
Atp11b	1175	0.199018	0.404881	-0.00640167	0.0241402
Zfp949	1178	0.200413	0.40722	0.000488781	0.0185175
Vav3	1177	0.200307	0.40722	-0.0254495	0.0145986
Mbnl2	1179	0.200618	0.407386	0.0128292	0.0374697
Rnf125	1073	0.200858	0.407623	0.0132328	0.0156382
Park2	1181	0.20107	0.407805	0.00259233	0.00580614
Elk4	1182	0.20125	0.407919	-0.0174224	0.0213123
1810032O08Rik	1183	0.202345	0.409888	-0.0189858	0.0242695
Mthfd2	862	0.203144	0.411255	0.0333739	-0.140587
C1ra	1184	0.203759	0.412249	-0.00559962	0.00524429
Btd	1185	0.205022	0.41455	-0.0341355	0.0202006
Rnf130	1186	0.205329	0.414917	-0.0217349	0.0197912
Prpsap1	863	0.206271	0.416518	0.049519	-0.155022
1010001B22Rik	1089	0.206372	0.416518	0.00655975	0.00821768
Ccdc57	979	0.207978	0.419502	0.00719168	0.00430548
Usp37	865	0.209368	0.42205	0.014383	0.00948144
2900060B14Rik	866	0.209938	0.422941	0.0400599	0.0378738
Gm16536	1191	0.211189	0.425202	0.000881966	0.00800991
Kdm3b	1192	0.212567	0.427716	-0.00942522	0.0122557
Itgb5	1193	0.212761	0.427847	-0.0129409	0.0221941
Spata5	1160	0.213467	0.429006	0.00858232	0.0138842
Plekhg6	1103	0.214086	0.429989	0.00926795	0.0128688
Fam20a	867	0.214249	0.430056	0.0279072	-0.0757402
Bmp2	1196	0.215731	0.432768	0.00569449	0.00738836
Lap3	869	0.216098	0.433243	0.0359209	-0.176591
Gm7694	1197	0.217603	0.435995	0.000740322	0.0102926
Gm14698	951	0.217882	0.436288	0.00552208	0.00296247
Hspb6	1198	0.218012	0.436288	-0.00144999	0.0122236
Adam15	1199	0.218991	0.437805	-0.0023131	0.0146154
Hdac7	1200	0.219035	0.437805	-0.0358998	0.015065
H2-T22	873	0.220314	0.440096	0.0337944	-0.00107663
Nrm	874	0.220988	0.440968	0.00837129	-0.0584794
Cgref1	1203	0.221017	0.440968	-0.0471095	0.0209158
Nrf1	876	0.222265	0.443192	0.0217543	0.00828552
Rdh10	1122	0.223482	0.445351	0.0188279	0.0245238
Abl2	1206	0.225146	0.448396	-0.0150721	0.0224601
Tc2n	880	0.225473	0.448778	0.0225563	0.0061239
AC160336.1	881	0.226185	0.449924	0.0138764	-0.000749859
Smc2	886	0.229375	0.455997	0.0103435	-0.11394
Adgre5	1135	0.230112	0.457187	0.00421775	0.00599974
Dll1	1209	0.230586	0.457854	-0.0063826	0.00712589
Kdelr2	1138	0.231234	0.458592	0.0243739	0.0236475
Ski	1192	0.231178	0.458592	0.0125059	0.0237424
Tgm1	889	0.231513	0.458871	0.0160407	-0.0297483
Cdkn2c	890	0.231679	0.458925	0.0164637	-0.0957899
Inhbb	1211	0.232086	0.459456	-0.0118488	0.00787896
Msl1	1212	0.232837	0.460666	-0.0139793	0.025438
Nup98	1214	0.233302	0.461311	-0.0108027	0.0136046
Tuba8	1146	0.233616	0.461657	0.00464191	0.00491457
Rtn4r	1215	0.234041	0.46222	0.00158119	0.00556701
Ccnt2	1216	0.234446	0.462744	0.00841615	0.0262091
Rin2	891	0.234689	0.462948	0.032409	-0.0261581
Lrp1	1217	0.236025	0.465307	-0.0296261	0.00652956
Plcd1	1218	0.236292	0.465556	-0.0318703	0.0176376
Ddx60	894	0.237474	0.467329	0.0134698	0.00757281
Rab33b	1188	0.237462	0.467329	0.0106902	0.0170526
Tnnt2	895	0.238484	0.469038	0.0206561	0.0092697
Klhl24	1220	0.238752	0.469286	-0.0201676	0.0252995
1700028J19Rik	1222	0.240636	0.472435	0.00298562	0.00652427
Cavin2	1223	0.240639	0.472435	-0.0129767	0.0268915
Nbl1	1226	0.24133	0.47295	-0.00592974	0.00544603
Micall2	1224	0.241216	0.47295	-0.0327634	0.0279284
Mphosph10	1225	0.241228	0.47295	-0.0515261	0.0231658
Robo1	1136	0.242742	0.475436	0.00549618	0.00398982
Gm17056	1159	0.242985	0.47563	0.00524461	0.00704395
Egln1	899	0.243577	0.476226	0.0190862	0.00337131
Rtn1	1151	0.243499	0.476226	0.0073092	0.00634697
Osgin1	1227	0.243723	0.47623	-0.0632987	0.0302523
Olfr920	900	0.244054	0.476316	0.00733448	0.00168397
Tnc	1067	0.244045	0.476316	0.00705194	0.00724052
Foxo3	902	0.244972	0.477825	0.0245564	-0.0254936
Lbh	904	0.245284	0.478153	0.00809191	-0.00126183
Ints6	1228	0.245706	0.478694	0.00205165	0.0159058
Ccdc88c	905	0.246206	0.479386	0.0159136	0.00762984
Sfmbt1	1230	0.247201	0.481041	-0.00349058	0.0116753
Fbxo2	1168	0.249097	0.484445	0.0073776	0.00887668
Akap11	906	0.249441	0.484828	0.0137033	0.00484628
Gramd1a	1231	0.250042	0.485711	0.00286156	0.0214007
Izumo4	1232	0.250339	0.486003	-0.00787085	0.0100227
Adat1	1171	0.250651	0.486196	0.00333335	0.00255802
Luc7l3	1233	0.250732	0.486196	-0.0500282	0.0311453
Ptp4a1	1234	0.250928	0.486292	-0.0721991	0.0235084
Rab34	1236	0.251341	0.486808	-0.0165399	0.018402
Klhdc7a	1237	0.251557	0.486941	-0.00247871	0.00662734
Gjb1	907	0.251894	0.487309	0.00688539	-0.0206375
Tfap2c	908	0.252765	0.488512	0.0240791	-0.0377219
Rgmb	1238	0.252811	0.488512	-0.0129911	0.0152256
Sp3os	909	0.253067	0.488721	0.0222925	-0.0235781
Fbxw17	911	0.254015	0.490267	0.0155104	-0.000409427
Ly75	1239	0.254454	0.490827	-0.00993621	0.00651024
Lman1	914	0.256032	0.493584	0.0320359	-0.159374
Rnmt	1185	0.256513	0.493936	0.0116749	0.0209366
Acsl1	1241	0.256495	0.493936	0.00745417	0.0231315
Pcdhb9	1243	0.256723	0.494054	-0.002969	0.00527086
Cdk5r1	1244	0.257989	0.496202	0.000635609	0.00388418
Tyms	916	0.259498	0.498814	0.0130152	-0.171541
Hyal1	920	0.260703	0.500839	0.0141119	-0.00393813
Trabd2b	1245	0.261019	0.501157	0.00442687	0.0127043
Nktr	1033	0.262494	0.503697	0.0275376	0.0143369
Fubp1	1248	0.265509	0.508893	-0.0210188	0.035407
Ntn1	1247	0.265384	0.508893	-0.05469	0.0176665
Lad1	1093	0.266571	0.510632	0.0320084	0.0303745
Slbp	1251	0.266899	0.510965	-0.0242632	0.0240198
Fam213b	922	0.267096	0.511046	0.0161737	0.00553047
Bmt2	1252	0.267911	0.51231	-0.0166232	0.0120192
Nans	924	0.268687	0.513497	0.0299873	-0.364183
Ttc14	1253	0.271271	0.518138	0.00960149	0.0273689
Slc4a11	1209	0.273728	0.522528	0.00708704	0.0105701
Them4	928	0.274437	0.523369	0.0124251	-0.0457931
Rad52	1258	0.274484	0.523369	-0.0316108	0.0164381
Slc38a2	1220	0.275315	0.524651	0.0184227	0.0193942
Ireb2	931	0.275746	0.525169	0.0181327	-0.00503679
9330111N05Rik	1261	0.277779	0.528737	-0.00610438	0.00697513
4931406C07Rik	934	0.278429	0.529605	0.0275253	-0.0675203
Spice1	935	0.278555	0.529605	0.00803896	0.00298611
Zfp777	1263	0.278735	0.529644	0.00179631	0.0116675
Nradd	936	0.278923	0.529699	0.00434159	0.00217384
Serpinb5	1266	0.282998	0.537129	-0.105887	0.0384477
Fam208a	1267	0.283392	0.537569	-0.00170921	0.0132808
Amotl1	1268	0.285579	0.541407	-0.0418411	0.0333473
Nudt12	1139	0.287468	0.544675	0.00575926	0.00392279
Aqp5	944	0.288216	0.54563	0.0543698	-0.487281
Tmem86a	945	0.288465	0.54563	0.0111201	-0.00374805
Tmem120a	1270	0.288363	0.54563	-0.0529772	0.0260358
Zfp994	1271	0.28898	0.546291	-0.00262562	0.00706367
Marf1	948	0.290525	0.548898	0.0151888	-0.00473884
Cenpe	949	0.290851	0.549202	0.00368641	-0.0477813
Malt1	1272	0.291607	0.550315	-0.0197932	0.00964519
Bst2	1273	0.292495	0.551677	-0.15997	0.0566212
Rbm27	1274	0.293424	0.553113	-0.000930968	0.0221788
Cbx3	956	0.295584	0.556868	0.0186137	-0.11635
2810004N23Rik	957	0.296772	0.558789	0.0232482	-0.0786801
Ptn	958	0.297285	0.559437	0.0107294	-0.0264696
Maged1	1278	0.299454	0.563198	0.00119301	0.0284272
Phip	960	0.300133	0.564154	0.0249273	-0.0325653
Igf2bp3	1081	0.300463	0.564455	0.0123754	0.00817906
Dusp7	1280	0.302077	0.567166	-0.0242585	0.0107743
Rpap1	961	0.302787	0.568175	0.00893425	-0.00664056
Chpt1	963	0.303239	0.568351	0.023367	-0.0774743
C1qtnf12	1086	0.303567	0.568351	0.0218169	0.0163551
Cd27	965	0.303399	0.568351	0.0103628	0.00326254
Zfp846	962	0.303227	0.568351	0.00696428	0.000408856
Dedd2	1282	0.303902	0.568657	-0.00570973	0.0171718
Rrm2	966	0.304317	0.569113	0.00338497	-0.0565082
B4galt1	1283	0.304839	0.569766	0.00767858	0.0262704
Ddx39	1204	0.306351	0.57227	0.0164056	0.00879274
Stat2	1278	0.307182	0.573498	0.00302146	0.006296
Lgmn	1286	0.308486	0.575608	-0.0231694	0.016821
Wdr54	1288	0.309207	0.576629	-0.00197643	0.00673276
Scx	972	0.310232	0.578215	0.00754518	-0.00220102
Acp5	974	0.310693	0.578749	0.0110567	-0.000901906
Rab27b	1283	0.312353	0.581513	0.00889509	0.00927378
Syngr1	978	0.312914	0.58223	0.0234771	0.00363124
Ddx46	980	0.315141	0.586045	0.0280217	-0.00455543
Esyt3	1291	0.315791	0.586924	-0.0147072	0.0103289
Wdr43	1292	0.31653	0.587967	-0.0914095	0.0270407
Rabep1	1292	0.316815	0.588169	0.00832922	0.012419
Zdhhc21	981	0.318683	0.591304	0.0143331	0.0046387
Pigw	1293	0.31902	0.591598	-0.00822137	0.00484343
Gm26917	986	0.320093	0.592968	0.0329933	-0.0808038
Xdh	987	0.320117	0.592968	0.0212878	-0.0399792
Hes1	1296	0.320785	0.593874	-0.032949	0.0225723
Smim22	1166	0.323236	0.598076	0.0224861	0.0156919
Cetn3	991	0.323899	0.598634	0.0292694	-0.141697
Parp14	1201	0.323871	0.598634	0.00957193	0.0068637
Gm13830	993	0.324741	0.599855	0.0115314	0.00928048
Lsm5	994	0.325995	0.601511	0.0180998	-0.185563
9130019O22Rik	1298	0.326	0.601511	0.00133195	0.00886858
Pcbp4	995	0.326202	0.601548	0.0239808	-0.0916684
Lima1	997	0.327619	0.603826	0.0229417	-0.0322212
Narf	998	0.328022	0.603896	0.0107544	-0.0701877
Kazald1	1300	0.327937	0.603896	0.00232655	0.00477195
Macc1	1000	0.330272	0.607591	0.0238804	-0.00577841
Hk2	1303	0.330396	0.607591	-0.0245832	0.0177206
Sdc1	1002	0.331323	0.608957	0.0342297	-0.0178984
Efnb2	1304	0.331804	0.609504	-0.000892506	0.0135653
Akr1c13	1010	0.333441	0.612171	0.0045206	0.00083827
Mxd1	1305	0.333811	0.612512	-0.0341231	0.0133661
Brd2	1332	0.334076	0.612658	0.0155005	0.0174245
Cmtr1	1237	0.334444	0.612994	0.00335849	0.00249312
Ptcra	1231	0.33475	0.613215	0.0035	0.00309344
Rcn1	1325	0.335391	0.614049	0.00482687	0.005096
Terf1	1336	0.335783	0.614304	0.00518507	0.00688088
Cbr3	1307	0.335901	0.614304	-0.0101247	0.00847338
Vsig10	1309	0.336318	0.614727	0.00166295	0.0290846
Spred3	1313	0.338333	0.617388	-0.000923028	0.00809867
Meltf	1310	0.338034	0.617388	-0.0117331	0.012937
Naga	1312	0.33823	0.617388	-0.0170092	0.0145445
Cmas	1007	0.340452	0.620912	0.0355963	-0.318559
Hnrnpa1	1008	0.340723	0.621064	0.0394806	-0.38637
Stac2	1009	0.34141	0.621974	0.00677956	-0.00198301
Klk1b26	1315	0.342219	0.623105	-0.0258775	0.0122249
Gm15420	1348	0.342887	0.623979	0.00148259	0.00333916
Ldhd	1062	0.343183	0.624175	0.0285285	0.0122818
Rb1	1317	0.344231	0.625738	-0.0797711	0.0123275
Slc39a14	1319	0.345488	0.627677	-0.114256	0.0213438
Hgh1	1320	0.346213	0.62865	-0.0151946	0.0111586
Cwf19l2	1015	0.347662	0.630935	0.011913	-0.0100665
Unc93b1	1191	0.348355	0.631847	0.00471268	0.00362209
BC017158	1017	0.349333	0.633274	0.00532061	-0.00671879
Gng11	1177	0.349896	0.633601	0.0121515	0.005931
Gspt1	1321	0.349752	0.633601	-0.0667125	0.027353
Pdlim2	1148	0.350266	0.633923	0.0163828	0.00633712
Usp53	1254	0.350736	0.634429	0.0067624	0.00532864
Rbsn	1323	0.351339	0.635173	0.00147479	0.00904595
Pradc1	1021	0.352564	0.635879	0.0207582	-0.177998
Chst7	1019	0.352397	0.635879	0.00619883	0.000413457
Abca7	1023	0.352882	0.635879	0.00612713	0.00220342
Batf2	1022	0.352812	0.635879	0.00603616	-0.00695792
Phldb2	1340	0.352416	0.635879	0.00357307	0.0032106
Slc4a4	1326	0.352837	0.635879	0.00291913	0.00570725
Bend5	1024	0.353236	0.63617	0.014377	-0.00778467
Rnf216	1328	0.354023	0.637241	-0.000408293	0.0123849
Egr3	1026	0.354305	0.637402	0.00976329	-0.0255821
AC168977.1	1362	0.354956	0.637882	0.0035259	0.00795766
Gnl3	1331	0.354878	0.637882	-0.176897	0.0326703
Cited1	1029	0.355514	0.638374	0.00650247	-0.0115778
Igfbp7	1332	0.355616	0.638374	-0.0846079	0.0115008
Morc3	1333	0.356279	0.639218	-0.00269196	0.0147352
Dapk1	1030	0.356583	0.639417	0.0112182	0.00194754
Fam46a	1031	0.357005	0.639827	0.0101161	-0.00671374
Traf4	1032	0.357623	0.640588	0.0266202	-0.106272
Naaladl2	1035	0.358562	0.641922	0.00916561	0.00113531
Ablim1	1358	0.359622	0.643288	0.00253774	0.00886337
Tra2a	1334	0.359713	0.643288	-0.00399696	0.032919
Mcm3	1038	0.360846	0.644966	0.0043359	-0.0533916
Rorc	1069	0.36171	0.645903	0.0142952	0.00562016
Ambra1	1336	0.36176	0.645903	0.00346414	0.0123978
Mmp13	1383	0.363251	0.647866	0.00116641	0.00358255
Ovol2	1337	0.363207	0.647866	-0.00586543	0.0104597
Lactb	1386	0.363967	0.648794	0.00623781	0.00911319
Cyba	1352	0.365333	0.650879	0.00341354	0.00758913
Slc5a8	1228	0.366793	0.653128	0.0127654	0.00440992
Mgst3	1045	0.367286	0.653517	0.0268669	-0.196504
Mpp6	1046	0.367406	0.653517	0.0261063	-0.0433824
Gm7967	1338	0.367792	0.653852	0.00335408	0.00805671
Dst	1340	0.368235	0.653938	-0.0077918	0.0170151
P2ry2	1339	0.368171	0.653938	-0.126201	0.0113484
Tkt	1048	0.369415	0.655682	0.0312524	-0.33836
Arsa	1393	0.370011	0.656388	0.00270124	0.00242981
Txnrd2	1050	0.370487	0.656881	0.0154037	-0.00158553
Ccl5	1343	0.373626	0.661755	0.0042656	-0.0028014
Usp27x	1342	0.373636	0.661755	-0.000278781	0.00622262
Enho	1052	0.377594	0.668407	0.00317157	-0.00188498
Rdm1	1343	0.379033	0.670597	0.00185569	0.0140936
Grn	1344	0.379511	0.671084	-0.0680765	0.0110228
Socs5	1054	0.379758	0.671163	0.0248633	-0.00985829
Uhrf2	1057	0.380598	0.672288	0.0239149	0.0061013
Sc5d	1061	0.384385	0.677532	0.0138551	-0.00446257
Dnmt1	1060	0.38426	0.677532	0.010454	-0.107498
Lin54	1346	0.383837	0.677532	-0.00622349	0.00934385
Mmp14	1348	0.384113	0.677532	-0.021402	0.0167075
Exd1	1419	0.385957	0.679942	0.00188016	0.0027772
Hat1	1064	0.386972	0.681366	0.0180094	-0.00834418
Tsga10	1294	0.387515	0.68196	0.00246169	0.0015595
Fam109a	1066	0.388842	0.683569	0.0120263	-0.000583265
Mbnl1	1351	0.388763	0.683569	-0.0237517	0.0130401
Alkbh1	1353	0.389644	0.684616	-0.197252	0.0139785
Zfp654	1354	0.390768	0.686052	-0.0118619	0.0061427
Ddah1	1355	0.390876	0.686052	-0.0845282	0.0155044
Secisbp2	1409	0.392171	0.687961	0.00502829	0.00498029
Oaf	1430	0.394264	0.691267	0.000667447	0.00223354
Cd82	1404	0.395091	0.691983	0.00723813	0.0250476
Zbtb5	1236	0.395042	0.691983	0.00299275	0.00141285
Cenpa	1068	0.395454	0.692203	0.00822121	-0.0846632
Fxyd6	1360	0.395634	0.692203	-0.0949256	0.0103175
Gm20234	1439	0.398624	0.697066	0.00111821	0.00381525
Elf5	1071	0.400865	0.700615	0.0232074	-0.276294
Tsc22d2	1261	0.40159	0.701344	0.0113387	0.000607587
Nt5dc3	1363	0.401706	0.701344	-0.00434459	0.0072418
9230102O04Rik	1075	0.40234	0.702081	0.010843	-0.00322088
Ctnnbip1	1077	0.403682	0.703682	0.0326366	-0.201206
Shroom3	1364	0.403603	0.703682	-0.0184979	0.0148052
Cep290	1078	0.406717	0.708598	0.0113107	-0.0345202
Gstm1	1365	0.406987	0.708697	-0.00726555	0.00376502
Rnf225	1366	0.407229	0.708745	-0.000361411	0.00338684
Ckmt1	1080	0.408054	0.709063	0.0199558	-0.0739864
Bbs12	1449	0.407671	0.709063	0.00101157	0.00282237
Tmx4	1367	0.40801	0.709063	-0.00533405	0.0096266
Bglap3	1085	0.409157	0.709863	0.0101487	-0.00343663
Pdlim4	1083	0.408932	0.709863	0.00861794	-0.00445476
Pfkfb3	1368	0.409004	0.709863	-0.0504986	0.0176137
Psip1	1087	0.409627	0.709934	0.0241247	0.00165924
Mctp2	1457	0.409418	0.709934	0.0015558	0.00157421
Car5b	1088	0.410182	0.710525	0.0114351	-0.0132611
Ankrd13c	1369	0.410759	0.711153	-0.0164612	0.0150691
Aplp1	1207	0.412548	0.713877	0.0135836	0.00517218
Spata7	1169	0.414134	0.715873	0.0226008	0.00676792
Fgfr1op	1453	0.414028	0.715873	0.00310743	0.00670439
Orc6	1090	0.415225	0.717384	0.0122949	-0.0329783
Btn1a1	1091	0.416126	0.718263	0.0320734	-0.0775109
Cyp51	1092	0.416661	0.718263	0.00996857	-0.0369159
Spty2d1	1415	0.416818	0.718263	0.0049833	0.0157148
Zfp959	1423	0.416674	0.718263	0.00247613	0.00443708
Socs1	1372	0.41673	0.718263	-0.020854	0.00681935
Ift122	1313	0.417284	0.718693	0.002604	0.00113165
Irf2	1094	0.417621	0.718898	0.0163799	-0.011118
Zkscan17	1396	0.41993	0.722498	0.00306049	0.00990002
Apod	1373	0.420816	0.723647	-0.033405	0.00655995
Tspan4	1096	0.421416	0.724302	0.0174128	0.000100765
Lsm2	1097	0.421808	0.724599	0.0273325	-0.0399359
Col4a5	1374	0.422525	0.725456	-0.0211696	0.0137277
Oas2	1367	0.422891	0.725707	0.00398976	0.00203723
Trip11	1375	0.423546	0.726455	0.00314206	0.0167015
Mpp7	1480	0.423821	0.72655	0.00393983	0.00680176
Hist1h2ae	1099	0.424694	0.727177	0.00723085	-0.0462578
Plk4	1100	0.424845	0.727177	0.00687772	-0.0319798
Itgb1	1377	0.424479	0.727177	-0.0264578	0.0264241
2310001H17Rik	1378	0.425093	0.727225	-0.00455058	0.0065029
Tspan7	1379	0.425938	0.728294	-0.0191113	0.0209058
Tgfbr1	1381	0.428457	0.732223	-0.039668	0.00971561
Crem	1104	0.430369	0.735112	0.016607	-0.00135434
Bcl3	1106	0.430718	0.735329	0.0222316	-0.00197646
Wfdc18	1107	0.431685	0.736389	0.0748317	-0.524245
Ncald	1488	0.431784	0.736389	0.00114897	0.00283405
Gm32036	1108	0.433208	0.738438	0.00371235	-0.00164724
Slc5a6	1109	0.434458	0.740188	0.00474602	-0.00258698
Nudt8	1493	0.435204	0.740785	-0.00163928	0.00139639
Tgfbr3	1384	0.435453	0.740785	-0.0021576	0.00429101
Wnk1	1385	0.435479	0.740785	-0.0290408	0.0159711
H2afx	1110	0.435915	0.741144	0.0142955	-0.0877659
Parp1	1111	0.437021	0.742644	0.0105376	-0.0864084
Ddx58	1112	0.43795	0.743079	0.01002	-0.0124547
Arid5a	1498	0.437648	0.743079	0.00358911	0.00372316
Gm26518	1387	0.437887	0.743079	0.000460896	0.00456947
Gbp3	1114	0.438795	0.74337	0.0140712	-0.0387621
Dhfr	1113	0.438691	0.74337	0.00848686	-0.0729612
Ulk3	1501	0.438441	0.74337	0.00206189	0.0014903
Flot1	1117	0.441781	0.747451	0.0196965	-0.0178287
Tmem240	1389	0.441587	0.747451	-0.00360618	0.0024647
Qpct	1390	0.44188	0.747451	-0.0309613	0.00774265
Tmem258	1120	0.44359	0.74996	0.0259484	-0.381981
Zfp513	1391	0.444051	0.750356	-0.00438034	0.0111777
Kazn	1392	0.444631	0.750953	-0.00260956	0.0156077
Trim12c	1510	0.445175	0.751488	0.000873525	0.00131121
Gclm	1154	0.446783	0.753818	0.0241422	0.0051803
Gm42788	1255	0.447789	0.755131	0.00575644	-0.000334678
Gne	1123	0.448086	0.755247	0.0105914	-0.0172352
Nus1	1432	0.448916	0.756139	0.0118815	0.0133023
Sp110	1515	0.449072	0.756139	0.000803338	0.00671914
Birc5	1124	0.449676	0.756387	0.00748839	-0.37271
Chst1	1394	0.449628	0.756387	-0.0162682	0.0153515
Cdk1	1125	0.450195	0.756877	0.00405806	-0.10173
Garnl3	1398	0.451773	0.758599	-0.0058765	0.00359826
Man1a	1399	0.451847	0.758599	-0.00747478	0.00763496
Kansl1l	1400	0.451907	0.758599	-0.0121503	0.0051026
Cebpa	1401	0.452197	0.758702	-0.0162448	0.00930722
Xrn1	1129	0.453267	0.760111	0.0125096	-0.00378803
Atg9a	1521	0.454661	0.761935	0.0014973	0.00194939
Alas1	1403	0.454815	0.761935	-0.00332782	0.0106547
Stat3	1405	0.456683	0.764678	-0.0726959	0.00862895
Ipmk	1131	0.458096	0.76627	0.00911311	-0.00146174
Tspan17	1406	0.457957	0.76627	-0.0228405	0.00628011
Gm32618	1132	0.458745	0.766581	0.00466186	-0.000576787
Cdh2	1407	0.458655	0.766581	-0.0108565	0.00340303
Ice2	1133	0.459137	0.766849	0.00332792	-0.00266767
Irgm1	1134	0.459394	0.766892	0.00735286	-0.0177716
Pus3	1410	0.460199	0.767461	-0.0128913	0.00707332
Hspa1a	1409	0.460021	0.767461	-0.432684	0.030504
Ncapg2	1140	0.463699	0.772909	0.00513824	-0.0171451
Slc44a2	1141	0.464095	0.77318	0.00771084	-0.0152938
Tiam2	1411	0.465116	0.774492	-0.0127558	0.00502709
Zfp292	1142	0.465794	0.774842	0.00742467	-0.0372101
Cxcl2	1412	0.465617	0.774842	-0.0146202	0.0274496
Atrx	1143	0.466439	0.775384	0.0221644	-0.0871328
Angel2	1144	0.466588	0.775384	0.011899	-0.00220754
Egr1	1145	0.46723	0.776062	0.0205314	-0.0585834
Sprr2a3	1147	0.468313	0.777469	0.00707203	-0.000512979
Sparc	1414	0.469417	0.778912	-0.017181	0.00537665
Ccna2	1149	0.47026	0.779921	0.00188945	-0.0525826
Gps1	1150	0.4714	0.781419	0.0289112	-0.0872656
Igtp	1152	0.473746	0.783348	0.0242125	-0.0503095
[truncated: 1,313 more rows]
