# Supplementary material for: Single-cell RNA-sequencing reveals distinct patterns of cell state heterogeneity in mouse models of breast cancer
Source: eLife. 2020 Aug 25;9:e58810. doi: 10.7554/eLife.58810 (PMC7447441; doi:10.7554/eLife.58810)
Supplement: Figure 4—source data 4. [file elife-58810-fig4-data4.xlsx]

## Sheet: PyMT_3clusters_GO
	GO.ID	Term	Annotated	Significant	Expected	Fisher.classic	Clusters
1	GO:0099173	postsynapse organization	42	4	0.65	0.00027	3
2	GO:0006096	glycolytic process	25	4	0.39	0.00052	3
3	GO:0046364	monosaccharide biosynthetic process	21	3	0.33	0.00389	3
4	GO:0006081	cellular aldehyde metabolic process	21	3	0.33	0.00389	3
5	GO:0010927	cellular component assembly involved in morphogenesis	24	3	0.37	0.00572	3
6	GO:0031032	actomyosin structure organization	57	4	0.89	0.00698	3
7	GO:0030855	epithelial cell differentiation	159	7	2.48	0.00865	3
8	GO:0042180	cellular ketone metabolic process	41	3	0.64	0.00969	3
51	GO:0006119	oxidative phosphorylation	20	4	0.31	0.00021	2
52	GO:0009166	nucleotide catabolic process	42	4	0.65	0.002	2
53	GO:0006412	translation	93	6	1.45	0.00219	2
54	GO:0007005	mitochondrion organization	110	6	1.72	0.00524	2
55	GO:0031668	cellular response to extracellular stimulus	68	3	1.06	0.00626	2
56	GO:1901992	positive regulation of mitotic cell cycle phase transition	28	3	0.44	0.00887	2
57	GO:1901136	carbohydrate derivative catabolic process	29	3	0.45	0.00979	2
101	GO:2001243	negative regulation of intrinsic apoptotic signaling pathway	36	5	0.55	0.00018	1
102	GO:0051248	negative regulation of protein metabolic process	269	15	4.11	0.00105	1
103	GO:0051897	positive regulation of protein kinase B signaling	32	4	0.49	0.00126	1
104	GO:0050868	negative regulation of T cell activation	40	4	0.61	0.00156	1
105	GO:0033554	cellular response to stress	450	17	6.87	0.00174	1
106	GO:0006915	apoptotic process	500	20	7.63	0.00215	1
107	GO:0006811	ion transport	251	6	3.83	0.00219	1
108	GO:0051260	protein homooligomerization	93	6	1.42	0.00256	1
109	GO:0010628	positive regulation of gene expression	451	12	6.89	0.00286	1
110	GO:0008284	positive regulation of cell proliferation	236	11	3.6	0.00331	1
111	GO:0043901	negative regulation of multi-organism process	56	6	0.86	0.00358	1
112	GO:0045926	negative regulation of growth	79	4	1.21	0.00363	1
113	GO:2000514	regulation of CD4-positive, alpha-beta T cell activation	21	3	0.32	0.00366	1
114	GO:0050766	positive regulation of phagocytosis	22	3	0.34	0.00419	1
115	GO:0031663	lipopolysaccharide-mediated signaling pathway	22	3	0.34	0.00419	1
116	GO:0045620	negative regulation of lymphocyte differentiation	22	3	0.34	0.00419	1
117	GO:0006457	protein folding	45	4	0.69	0.00458	1
118	GO:1905954	positive regulation of lipid localization	23	3	0.35	0.00477	1
119	GO:0045669	positive regulation of osteoblast differentiation	23	3	0.35	0.00477	1
120	GO:0070228	regulation of lymphocyte apoptotic process	24	3	0.37	0.00539	1
121	GO:0043154	negative regulation of cysteine-type endopeptidase activity involved in apoptotic process	24	3	0.37	0.00539	1
122	GO:0045071	negative regulation of viral genome replication	25	3	0.38	0.00607	1
123	GO:0050852	T cell receptor signaling pathway	26	3	0.4	0.00678	1
124	GO:0033138	positive regulation of peptidyl-serine phosphorylation	27	3	0.41	0.00755	1
125	GO:0042035	regulation of cytokine biosynthetic process	28	3	0.43	0.00837	1
126	GO:0030593	neutrophil chemotaxis	29	3	0.44	0.00923	1
127	GO:0002009	morphogenesis of an epithelium	148	6	2.26	0.00941	1
