# Supplementary material for: Single-cell RNA-sequencing reveals distinct patterns of cell state heterogeneity in mouse models of breast cancer
Source: eLife. 2020 Aug 25;9:e58810. doi: 10.7554/eLife.58810 (PMC7447441; doi:10.7554/eLife.58810)
Supplement: Figure 4—source data 5. [file elife-58810-fig4-data5.xlsx]

## Sheet: 1- Proliferating IFN
	Top	p.value	FDR	logFC.2	logFC.3
H2afz	1	1.34842e-186	1.45953e-182	2.04405	1.87579
Hmgb2	2	1.73542e-137	9.39207e-134	1.76578	1.63223
Cks1b	3	5.63576e-129	2.03338e-125	1.53329	1.2696
Birc5	3	2.89124e-111	7.82368e-108	1.33417	1.30261
Pclaf	4	3.01523e-106	5.43947e-103	1.22157	1.20057
Lsm4	5	1.24505e-109	2.69529e-106	1.31769	0.981728
Spc24	6	1.18022e-98	1.41941e-95	0.834302	0.812035
Selenoh	7	1.46771e-105	2.2695e-102	1.20998	0.973064
Top2a	7	1.43208e-97	1.55008e-94	1.34789	1.31128
Tuba1b	8	4.05789e-103	5.49032e-100	1.56154	1.12675
Smc4	8	3.73578e-91	3.11047e-88	1.21318	1.13806
Smc2	9	7.14217e-93	6.44223e-90	0.960811	0.908636
Dtymk	11	2.58747e-93	2.54607e-90	1.06724	0.812269
Mrpl13	11	1.96939e-90	1.42111e-87	1.11627	0.94653
Mki67	12	5.48453e-76	3.29803e-73	0.758995	0.733362
Hint1	13	4.92887e-80	3.33438e-77	0.902049	0.750418
Hmgb1	14	1.48662e-90	1.14937e-87	1.16889	0.765658
Cdkn1a	15	4.33403e-65	2.03963e-62	0.14538	0.988417
Pmf1	16	1.19445e-79	7.60514e-77	0.735891	0.667288
Sec11c	17	4.61159e-63	1.98002e-60	0.874159	1.04873
Tk1	18	2.40992e-63	1.08688e-60	0.620845	0.614218
Dctpp1	19	5.7013e-71	3.24794e-68	0.85682	0.538475
Tyms	20	8.56608e-71	4.63596e-68	0.737248	0.663324
Ube2s	20	4.99386e-57	1.42246e-54	0.861872	0.874968
Stmn1	21	1.20629e-70	6.21756e-68	0.932145	0.744806
Cenpa	21	2.04343e-69	1.00537e-66	0.97096	0.893754
Cdca8	22	2.47611e-56	6.53694e-54	0.549079	0.550292
Dut	24	4.75615e-63	1.98002e-60	1.02547	0.787685
Cdk1	24	3.16736e-55	7.79169e-53	0.658849	0.653916
Dek	25	7.28568e-63	2.92075e-60	0.889507	0.725816
Ube2c	25	7.90347e-58	2.4442e-55	0.808044	0.787443
Anp32b	26	8.98253e-62	3.47239e-59	0.875076	0.676379
Atf3	26	1.93693e-54	4.55767e-52	0.423704	1.23861
Anln	27	5.20829e-61	1.94395e-58	0.681066	0.603852
Banf1	28	5.86534e-61	2.11621e-58	0.874245	0.611755
Pttg1	28	5.14028e-56	1.32472e-53	0.817783	0.794293
Tipin	29	1.05181e-60	3.67251e-58	0.651752	0.529178
Mthfd2	29	7.50362e-58	2.3888e-55	0.64548	0.613854
Ranbp1	30	1.21601e-59	4.11317e-57	0.902393	0.598957
Plk4	30	1.11921e-51	2.32968e-49	0.464803	0.499303
Mrpl42	31	8.07481e-59	2.64854e-56	0.828591	0.579133
Prc1	32	1.20338e-49	2.10087e-47	0.486632	0.525774
Cenpf	33	2.70818e-54	6.23687e-52	0.681865	0.656637
Tmpo	34	1.95623e-57	5.88172e-55	0.695719	0.566883
Cks2	34	2.68049e-49	4.60533e-47	0.659852	0.764168
Ccdc34	35	2.97648e-57	8.70742e-55	0.770189	0.670336
Rfc5	35	3.41629e-48	5.43793e-46	0.409597	0.412999
Cycs	36	8.85388e-57	2.45729e-54	0.88952	0.703536
Pbk	36	1.18921e-47	1.86551e-45	0.398989	0.398408
Atad2	37	2.24265e-56	6.06862e-54	0.693537	0.606435
Cenpw	38	1.22896e-52	2.71474e-50	0.488292	0.459735
Lsm5	39	8.38569e-56	2.11085e-53	0.69401	0.61007
Dhfr	40	1.06821e-46	1.65176e-44	0.468754	0.466775
Hist1h1e	41	9.72235e-55	2.33855e-52	0.778374	0.592908
Ccna2	42	1.29996e-45	1.95427e-43	0.388236	0.386807
Eif5a	44	3.21956e-54	7.26011e-52	0.744032	0.629962
Ran	44	1.13961e-49	2.02216e-47	0.718154	0.635509
Ptma	47	1.48565e-52	3.1917e-50	0.555447	0.454105
Ifrd1	47	2.24279e-43	3.15272e-41	0.144153	0.887414
Uqcrq	48	1.50385e-52	3.1917e-50	0.868897	0.764054
Cisd1	49	1.84606e-51	3.77015e-49	0.656336	0.578506
Cdca3	49	5.37108e-50	1.00235e-47	0.395997	0.372907
Alyref	50	2.61776e-51	5.24716e-49	0.737318	0.619843
Fabp5	51	2.95602e-51	5.81746e-49	0.810365	0.623349
Phgdh	52	2.08649e-50	4.02138e-48	0.706272	0.565258
Lig1	52	9.46535e-50	1.73649e-47	0.619909	0.562532
Ccnb2	53	2.11769e-50	4.02138e-48	0.603449	0.547968
Psat1	54	2.55197e-46	3.8905e-44	0.485897	0.463769
Cmc2	55	1.10311e-41	1.40471e-39	0.466917	0.498105
Psmb9	56	9.70352e-50	1.75051e-47	0.89399	0.595037
Rrm2	56	4.35755e-42	5.68267e-40	0.458303	0.452332
Hmgn2	58	3.00207e-49	5.07724e-47	0.798702	0.610516
Mcm5	59	4.69603e-49	7.81997e-47	0.46566	0.429514
Cdc20	59	2.47924e-40	2.91688e-38	0.392954	0.408306
Psip1	60	5.36007e-49	8.79051e-47	0.760765	0.633086
Tubb5	61	7.35987e-49	1.189e-46	1.10118	0.681347
Siva1	61	4.88532e-40	5.6254e-38	0.694681	0.702406
1810037I17Rik	63	1.55625e-39	1.71887e-37	0.577079	0.685607
Knstrn	64	1.59702e-39	1.74608e-37	0.33999	0.357763
Tpx2	65	1.74958e-39	1.89374e-37	0.341816	0.351039
Exosc8	67	4.66439e-44	6.86583e-42	0.606985	0.495412
Odc1	67	4.34603e-39	4.56713e-37	0.56096	0.892971
Ccnd1	68	4.69394e-44	6.86583e-42	0.92518	0.548765
Hells	68	5.74769e-40	6.48052e-38	0.444263	0.438525
Mcm3	69	6.82052e-44	9.84337e-42	0.406966	0.341416
Cenpe	69	2.4212e-40	2.87989e-38	0.49211	0.476922
Ndufb9	70	8.68624e-44	1.2371e-41	0.74957	0.400235
Nucks1	71	4.67586e-43	6.48865e-41	0.724777	0.460877
Ggct	71	4.47416e-38	4.40258e-36	0.236189	0.659998
H2afv	72	5.39791e-43	7.39582e-41	0.851682	0.590815
Mrpl18	73	1.40443e-42	1.90019e-40	0.672699	0.423862
Rfc2	74	2.42775e-42	3.24419e-40	0.508753	0.401559
Hmmr	74	1.74063e-37	1.65268e-35	0.339896	0.347029
Gins2	75	2.88689e-42	3.81069e-40	0.525423	0.434678
Cdt1	75	3.54914e-37	3.2895e-35	0.357146	0.38381
Anp32e	76	9.06316e-37	8.17497e-35	0.575786	0.594234
Cenpm	77	1.06701e-40	1.29768e-38	0.326542	0.312156
Dnajc19	78	4.5214e-42	5.82615e-40	0.596251	0.466087
Pthlh	78	1.10745e-36	9.90664e-35	-0.0786425	0.603142
Dpy30	79	1.67552e-41	2.10881e-39	0.693275	0.523441
Uhrf1	79	3.18168e-39	3.37632e-37	0.348096	0.334387
Pfn1	80	2.04651e-41	2.54614e-39	0.568006	0.466837
Upp1	80	1.70693e-36	1.5021e-34	0.469697	0.605186
Pfdn6	81	6.15003e-41	7.56453e-39	0.631299	0.353722
Hmox1	81	2.56078e-36	2.23531e-34	-0.632996	0.956116
Gmnn	82	2.58418e-39	2.76943e-37	0.417448	0.405436
Hist1h1b	83	2.7052e-36	2.34248e-34	0.470943	0.471644
Lsm3	84	2.04655e-40	2.46132e-38	0.580294	0.465817
Racgap1	84	4.54073e-38	4.42783e-36	0.323023	0.313441
Ybx1	85	7.53726e-38	7.28422e-36	0.575214	0.51978
Prim1	86	2.94344e-40	3.42578e-38	0.382	0.347498
Kif15	87	5.36724e-40	6.11527e-38	0.291014	0.278308
Fkbp3	89	8.42791e-40	9.4045e-38	0.719752	0.451594
Cenph	89	9.33838e-36	7.76925e-34	0.304869	0.29867
Dusp5	91	5.23691e-34	3.90927e-32	0.0603637	0.541367
Tmcc3	92	5.66507e-33	3.95605e-31	0.24677	0.493356
Mcm6	93	7.28582e-39	7.58286e-37	0.466038	0.380605
Cenpv	94	9.17261e-39	9.45565e-37	0.556452	0.338313
Rfc4	94	3.55572e-37	3.2895e-35	0.35869	0.335762
Hdgf	95	1.08928e-38	1.1123e-36	0.663081	0.482653
Lyar	96	1.17533e-38	1.18895e-36	0.727165	0.614943
Usp1	97	1.77174e-38	1.77567e-36	0.552197	0.441029
Vars	98	1.90084e-38	1.88758e-36	0.574696	0.379256
Tacc3	98	2.9892e-36	2.54765e-34	0.329154	0.312665
Cdkn3	99	1.56139e-35	1.27071e-33	0.347564	0.333207
Hist1h2ap	100	6.14053e-32	4.05275e-30	0.332315	0.339327
Psmc3ip	101	1.2935e-37	1.23901e-35	0.326967	0.28939
Incenp	101	3.52505e-34	2.66819e-32	0.32391	0.315056
Eif4ebp1	102	2.26022e-37	2.12736e-35	0.764106	0.551321
Ckap2l	102	9.82971e-34	7.23787e-32	0.32445	0.315261
Dnajc9	103	3.79578e-37	3.47304e-35	0.388884	0.360618
Rad51	104	2.62245e-33	1.85526e-31	0.244619	0.239129
Cxcl9	106	3.81829e-37	3.47304e-35	0.842646	0.663843
Kif11	106	6.29011e-31	3.95838e-29	0.229713	0.230528
Dbf4	108	9.57441e-31	5.99037e-29	0.368941	0.399296
Atp5g2	109	1.4888e-36	1.32089e-34	0.674885	0.421164
Diaph3	109	1.96035e-31	1.25555e-29	0.261078	0.256613
Slc25a5	110	2.80078e-36	2.406e-34	0.751323	0.638372
Rsbn1	110	1.61783e-30	9.94965e-29	-0.0748385	0.669426
Asf1b	111	2.87281e-31	1.82913e-29	0.256382	0.253309
Dcps	112	4.01483e-36	3.39504e-34	0.567239	0.324755
Sgo2a	113	2.48725e-32	1.69321e-30	0.294312	0.285304
Topbp1	114	6.49864e-36	5.45281e-34	0.465881	0.412789
Rpl13a	114	4.25265e-30	2.56627e-28	0.378883	0.512599
Lsm2	115	1.30105e-34	1.02047e-32	0.603023	0.549321
Rps2	116	9.40292e-36	7.76925e-34	0.46235	0.409014
Areg	117	5.67174e-30	3.33646e-28	-0.295685	0.915697
Sdhb	118	1.11407e-35	9.13541e-34	0.656894	0.447071
Dnajb1	118	6.56702e-30	3.84224e-28	-0.178744	0.721566
Hspe1	119	1.98264e-29	1.12356e-27	0.269665	0.50421
Snrpe	120	1.60783e-35	1.29875e-33	0.647416	0.476204
Ndufb8	121	1.8035e-35	1.44601e-33	0.636836	0.357026
Aurkb	121	2.74088e-29	1.54517e-27	0.212597	0.215602
Chaf1a	122	2.67407e-35	2.12824e-33	0.302311	0.272772
Ncapg2	122	2.92479e-29	1.6403e-27	0.242202	0.253688
Nhp2	123	7.75983e-35	6.13083e-33	0.684513	0.528629
Asns	123	5.21714e-30	3.08581e-28	0.396465	0.386482
Snrpf	125	1.39227e-34	1.08417e-32	0.641691	0.48608
Hmgb3	126	1.48299e-34	1.14656e-32	0.471627	0.260444
Nfu1	127	1.78932e-34	1.37359e-32	0.528482	0.412528
Calm1	127	2.87889e-28	1.54263e-26	0.487507	0.473793
Rrm1	128	2.26985e-34	1.7302e-32	0.310147	0.276729
Atf4	129	3.91728e-28	2.06832e-26	0.244946	0.644005
Hist1h2ae	130	5.77756e-28	3.02108e-26	0.347919	0.357214
Uqcr10	131	3.89969e-34	2.93127e-32	0.674132	0.468297
Smdt1	131	1.01932e-27	5.25387e-26	0.527936	0.554451
Clic1	132	1.0624e-27	5.44995e-26	0.337179	0.509636
Hpf1	133	8.17083e-34	6.0576e-32	0.566079	0.442085
Aspm	135	1.61535e-27	8.24743e-26	0.247543	0.250522
Rbm3	136	1.24393e-33	9.0975e-32	0.646833	0.551416
Cox5a	137	1.88237e-33	1.36743e-31	0.574337	0.504194
Shmt2	138	1.90927e-33	1.37773e-31	0.431171	0.372163
Tmem238	139	2.29417e-33	1.64451e-31	0.637134	0.278965
Lgals1	139	3.12074e-27	1.55663e-25	0.454212	0.521161
Dynlt1f	140	2.56714e-33	1.82807e-31	0.382767	0.302948
Hbegf	141	4.19359e-27	2.07267e-25	-0.44518	0.858195
Dnph1	142	3.60966e-33	2.53708e-31	0.306236	0.27747
Gltp	142	4.29907e-31	2.72123e-29	0.378068	0.35003
Rpa2	143	7.98531e-33	5.54058e-31	0.330114	0.291955
Gbp7	144	1.68999e-32	1.16512e-30	0.549074	0.436282
Haus8	144	8.69706e-27	4.2404e-25	0.233955	0.250787
Mrps24	145	1.83324e-32	1.25588e-30	0.622019	0.278027
Klf4	145	1.10339e-26	5.35564e-25	-0.0743147	0.515543
Irf8	146	7.63567e-28	3.97349e-26	0.572045	0.551552
Ppil1	147	3.69712e-32	2.5011e-30	0.463671	0.303718
Ska1	147	2.49946e-26	1.18659e-24	0.198266	0.201653
Hmgn1	148	3.83831e-32	2.57438e-30	0.617214	0.426087
Cdk4	149	3.85301e-32	2.57438e-30	0.63986	0.328995
Psph	149	1.18911e-31	7.75358e-30	0.441976	0.394689
Rfc3	150	3.88891e-32	2.58243e-30	0.409075	0.355807
Cox5b	151	9.73887e-32	6.3887e-30	0.589519	0.418159
Ncapg	151	8.29595e-28	4.29643e-26	0.227512	0.22184
Bub1	152	6.18481e-26	2.87315e-24	0.179924	0.186087
Pin1	153	1.35635e-31	8.7911e-30	0.567436	0.357812
Dusp14	153	6.56582e-26	3.03711e-24	0.0184762	0.350924
Bex3	154	1.52676e-31	9.83669e-30	0.661183	0.451439
Tubb6	156	8.34228e-26	3.82614e-24	0.312819	0.571584
Ndc80	157	1.07286e-25	4.89986e-24	0.186102	0.19272
Galk1	159	1.0296e-30	6.40481e-29	0.562424	0.239351
Mrpl33	159	1.16303e-25	5.28936e-24	0.499769	0.508228
Pdzd11	160	1.2866e-30	7.9578e-29	0.398249	0.328709
Clspn	160	1.17585e-25	5.30362e-24	0.193881	0.209709
Knl1	161	4.36603e-26	2.03698e-24	0.207769	0.20608
Ccnb1	162	2.27454e-27	1.1451e-25	0.242197	0.235831
Sf3b5	163	1.6964e-30	1.03739e-28	0.555781	0.424566
Anapc11	164	3.95129e-30	2.40274e-28	0.586224	0.490778
Rad18	164	1.9805e-25	8.74978e-24	0.236086	0.236542
Cyc1	165	4.26763e-30	2.56627e-28	0.530955	0.391866
Plk3	165	2.33423e-25	1.02706e-23	-0.112411	0.414464
Mrpl2	166	4.47456e-30	2.67584e-28	0.433092	0.24916
Socs1	166	2.64574e-25	1.15474e-23	0.362248	0.44606
Gtf2a2	167	4.92325e-30	2.92798e-28	0.540116	0.374875
Chek1	167	3.9164e-25	1.68889e-23	0.182731	0.225222
H2afx	169	8.37876e-30	4.8759e-28	0.472455	0.334775
Csrnp1	169	5.81205e-25	2.45741e-23	-0.0460846	0.359433
Cenps	170	8.70052e-30	5.01172e-28	0.296722	0.265943
C330027C09Rik	170	6.5805e-25	2.75009e-23	0.170542	0.18086
Ppih	171	8.70476e-30	5.01172e-28	0.404302	0.280751
Nubp1	172	1.33716e-29	7.65788e-28	0.430217	0.28457
Nme1	173	1.92451e-29	1.09636e-27	0.543568	0.305868
Nusap1	174	6.94429e-25	2.89096e-23	0.200016	0.199064
Nsmce1	175	3.64348e-29	2.03284e-27	0.413641	0.263035
Slfn9	175	1.68569e-25	7.50858e-24	0.281773	0.279019
Mrpl57	176	4.42973e-29	2.45884e-27	0.487706	0.357079
Oaz1	177	4.48602e-29	2.47738e-27	0.38577	0.301349
Ubc	177	2.95479e-24	1.20235e-22	-0.616073	0.644129
Ppia	178	4.97313e-29	2.73244e-27	0.446778	0.271195
Cryab	178	3.41312e-24	1.37337e-22	0.444842	0.452982
Pfdn1	179	6.80406e-29	3.71955e-27	0.634619	0.519526
Kif4	179	3.65437e-24	1.46499e-22	0.164243	0.173756
Nudcd2	180	7.53215e-29	4.09689e-27	0.522042	0.25082
Orc6	181	2.30394e-28	1.24689e-26	0.484055	0.427907
Nol7	182	2.68062e-28	1.44353e-26	0.561634	0.44699
Dynll1	182	6.9937e-24	2.75272e-22	0.129135	0.422611
Gbp3	183	3.05131e-28	1.62697e-26	0.505138	0.32531
Cep55	183	1.28793e-25	5.76056e-24	0.189788	0.184348
Rwdd1	184	3.19315e-28	1.69425e-26	0.544122	0.376972
Dtl	185	4.4945e-28	2.36158e-26	0.266386	0.222858
Snrnp25	186	1.51475e-23	5.77311e-22	0.305852	0.314328
Mad2l1	187	2.84167e-26	1.33732e-24	0.227783	0.216551
Spc25	188	1.35347e-23	5.17668e-22	0.164347	0.167276
Ddit3	189	2.03918e-23	7.69063e-22	0.312686	0.454187
Pdap1	190	1.66892e-27	8.48093e-26	0.569165	0.425124
Sgo1	190	2.16899e-23	8.15178e-22	0.166876	0.173126
Bok	191	2.18232e-27	1.10381e-25	0.529154	0.455071
Shcbp1	191	2.92393e-23	1.08758e-21	0.173086	0.18374
Fkbp2	192	1.17597e-25	5.30362e-24	0.548393	0.520433
Erh	193	2.30861e-27	1.15687e-25	0.550043	0.408525
Fen1	194	3.61272e-27	1.79377e-25	0.253273	0.229973
Igtp	195	5.48452e-27	2.69839e-25	0.6015	0.431586
Snrpa1	196	5.53068e-27	2.70878e-25	0.512165	0.315049
H1f0	197	1.205e-26	5.82275e-25	0.643525	0.475124
Dynap	197	8.60349e-23	3.14609e-21	0.16223	0.368189
Limd2	199	1.86576e-26	8.97557e-25	0.43454	0.16618
Cenpn	199	1.69547e-22	6.11726e-21	0.166894	0.172811
Ezh2	200	1.91902e-26	9.19091e-25	0.426084	0.296605
Cox6a1	200	1.91006e-22	6.84588e-21	0.4289	0.481408
Tmem14c	201	2.14437e-26	1.02249e-24	0.535415	0.415575
Dnmt1	202	2.76406e-26	1.30647e-24	0.370727	0.260138
Clcf1	202	2.59147e-22	9.16669e-21	-0.263036	0.532251
Txn1	203	2.8215e-22	9.94784e-21	0.254947	0.39158
Guk1	204	3.48161e-26	1.63138e-24	0.442271	0.241621
Cdkn2d	204	3.01353e-22	1.05561e-20	0.202472	0.216484
Slbp	205	3.23355e-22	1.12903e-20	0.307554	0.480594
Sertad1	207	3.97059e-22	1.38192e-20	0.171156	0.394612
Lsm6	208	7.15733e-26	3.29664e-24	0.508168	0.31406
Phlda1	208	5.05082e-22	1.75225e-20	-0.604798	0.721954
Vim	209	5.75249e-22	1.9893e-20	-0.0243277	0.793364
Krtcap2	210	1.28009e-25	5.74925e-24	0.566206	0.48223
Pkmyt1	210	1.19536e-23	4.58815e-22	0.237335	0.228172
Gm4610	211	7.4818e-22	2.57089e-20	0.225233	0.366997
Cenpq	212	7.87836e-22	2.69007e-20	0.198179	0.203765
Dnajc15	213	1.78484e-25	7.91769e-24	0.489619	0.200148
Tubg1	214	1.0013e-21	3.38689e-20	0.236062	0.241293
Mrpl28	215	2.57095e-25	1.12664e-23	0.507764	0.314361
Atad5	215	1.05171e-21	3.54632e-20	0.18093	0.191252
Sumo3	216	3.75014e-25	1.63018e-23	0.519335	0.318602
Lsm8	217	3.83368e-25	1.65983e-23	0.494005	0.362557
Minos1	217	3.9735e-24	1.58705e-22	0.536264	0.476254
Ndufc1	219	4.06127e-25	1.74441e-23	0.506372	0.367906
Ccdc124	220	4.34907e-25	1.86064e-23	0.479507	0.254614
Fosl1	220	2.27703e-21	7.49135e-20	-0.27452	0.603092
Cxcl10	221	3.04858e-21	9.99936e-20	0.723059	0.750136
Chchd1	222	5.18898e-25	2.21124e-23	0.492633	0.300739
Lamtor5	223	5.52813e-25	2.34653e-23	0.519158	0.312056
Nap1l1	224	6.06105e-25	2.55272e-23	0.531021	0.347333
Aunip	224	3.8514e-21	1.23336e-19	0.137047	0.144059
Hmgn3	225	6.1235e-25	2.56902e-23	0.453935	0.330458
Mybl2	225	7.9895e-21	2.50662e-19	0.147952	0.155813
Sae1	226	8.29608e-25	3.44049e-23	0.402564	0.27736
Rps12	226	8.28895e-21	2.59305e-19	0.337397	0.339351
Mrpl30	228	1.46771e-24	6.06354e-23	0.522819	0.376183
Rpa1	228	5.32497e-21	1.69025e-19	0.239862	0.234301
Taf10	229	1.66088e-24	6.83552e-23	0.49133	0.352236
Ect2	229	5.10085e-21	1.62387e-19	0.202251	0.204057
Mrps18c	230	1.80624e-24	7.40558e-23	0.431305	0.24041
S100a10	230	1.51813e-20	4.66824e-19	-0.0671004	0.364746
Atp5g1	231	1.86939e-24	7.63557e-23	0.552161	0.31113
Kif20b	231	2.15533e-22	7.6741e-21	0.195186	0.188769
Hnrnpa3	232	3.07858e-24	1.24804e-22	0.544363	0.265255
Ppp1r14b	233	3.12065e-24	1.26037e-22	0.570789	0.279836
Ube2t	233	3.25752e-20	9.93221e-19	0.195137	0.194532
Ankrd33b	234	3.47324e-20	1.05306e-18	0.15136	0.225941
Hirip3	235	5.47554e-24	2.17894e-22	0.222047	0.206188
Zbp1	236	5.69504e-24	2.25799e-22	0.575137	0.448518
Ndufab1	237	6.89697e-24	2.72455e-22	0.529219	0.301746
Kif22	238	5.95737e-20	1.78129e-18	0.14125	0.1431
Acsl5	239	7.25276e-24	2.84434e-22	0.514591	0.383296
Selenof	239	6.36807e-20	1.89363e-18	0.358649	0.443561
Mrpl20	240	7.90459e-24	3.08878e-22	0.507254	0.364377
Melk	240	7.02577e-20	2.07778e-18	0.138015	0.140758
Hnrnpab	241	8.19008e-24	3.18883e-22	0.503597	0.348973
Hsp90aa1	241	8.669e-20	2.54291e-18	-0.27322	0.435478
Naa38	242	9.58252e-24	3.71761e-22	0.460629	0.259465
Esco2	242	3.75712e-21	1.21394e-19	0.150141	0.14624
Mcm4	243	1.15928e-23	4.48146e-22	0.258546	0.23543
Ckap2	244	1.18691e-23	4.57194e-22	0.189232	0.166903
Lin54	244	1.25323e-19	3.64648e-18	0.176093	0.220951
Tma7	246	1.64868e-23	6.2615e-22	0.526426	0.299558
Elof1	247	1.97854e-23	7.48802e-22	0.469952	0.266812
Cenpu	247	8.36198e-20	2.45951e-18	0.13853	0.137878
Ndufs5	248	2.17899e-23	8.16103e-22	0.526815	0.406408
Cinp	248	2.00267e-21	6.60881e-20	0.344317	0.324706
Cdca5	249	2.33812e-19	6.73079e-18	0.145642	0.146222
Hnrnpa2b1	251	2.88622e-23	1.07726e-21	0.48559	0.376971
Bard1	251	7.05722e-20	2.0814e-18	0.163779	0.160213
Atp5o	252	3.2528e-23	1.20576e-21	0.527647	0.216496
Cdca2	252	3.80034e-19	1.07402e-17	0.136861	0.13859
Tmem97	253	3.53446e-23	1.3057e-21	0.338054	0.290498
Ap1s1	254	4.49469e-23	1.65478e-21	0.436875	0.198889
Pold4	255	6.00905e-19	1.68067e-17	0.0170924	0.434224
Rpsa	256	7.81926e-19	2.15907e-17	0.301271	0.298615
Snrpg	257	8.1623e-23	2.99487e-21	0.514601	0.323954
Snrpa	258	1.03812e-22	3.78338e-21	0.412874	0.246377
Rplp1	258	9.6031e-19	2.63149e-17	0.24935	0.302777
Hmgn5	259	2.86207e-22	1.00581e-20	0.273335	0.247662
Pih1d1	260	1.43096e-22	5.19754e-21	0.352766	0.272698
Timm50	261	1.68345e-22	6.0942e-21	0.346071	0.262804
Kif23	261	1.38734e-18	3.77302e-17	0.202793	0.220212
Ssna1	262	1.76631e-22	6.35167e-21	0.433265	0.242498
Hat1	263	1.9339e-22	6.90844e-21	0.337176	0.282602
Dlgap5	263	6.85238e-19	1.9116e-17	0.142412	0.140503
Ptpn22	264	2.03551e-18	5.48068e-17	0.0347245	0.231604
Mrpl49	265	2.39797e-22	8.51006e-21	0.384519	0.22664
Foxm1	265	2.30865e-18	6.18534e-17	0.114821	0.131319
Zwilch	266	2.3799e-18	6.36049e-17	0.124081	0.130526
Nudt19	267	6.14631e-22	2.11872e-20	0.28797	0.240057
Serpina3g	268	7.8182e-22	2.67798e-20	0.474766	0.321096
Mis18a	268	3.49627e-18	9.25273e-17	0.17815	0.183812
Lockd	269	3.57316e-18	9.43313e-17	0.204594	0.230616
Nudt21	270	9.8189e-22	3.34213e-20	0.492715	0.345082
Cenpp	270	8.75013e-20	2.55977e-18	0.149155	0.141883
Rfc1	271	9.85115e-22	3.3426e-20	0.380521	0.243107
Mcm10	271	3.86494e-18	1.01786e-16	0.124336	0.131425
0610010K14Rik	272	1.15609e-21	3.88619e-20	0.305958	0.249266
Tars	273	1.25334e-21	4.20005e-20	0.42527	0.284705
Srxn1	274	5.48781e-18	1.42789e-16	-0.0826912	0.408328
Pole3	275	1.33299e-21	4.45317e-20	0.384737	0.212355
Fxyd5	275	5.73507e-18	1.48154e-16	0.068338	0.482188
Gins1	277	1.44168e-21	4.80145e-20	0.179149	0.145687
Cit	277	4.05471e-18	1.06267e-16	0.147209	0.14665
Atp5f1	278	1.56592e-21	5.19923e-20	0.503406	0.321285
Pithd1	278	9.64035e-18	2.47268e-16	0.207127	0.256673
Fbxo5	279	1.77061e-21	5.86088e-20	0.16103	0.141691
Hsph1	279	1.02254e-17	2.61655e-16	-0.422194	0.467774
Slc3a2	280	1.22961e-17	3.13161e-16	0.291035	0.474704
E2f1	282	3.17393e-21	1.0379e-19	0.260187	0.224496
Npm1	282	1.57427e-17	3.97201e-16	0.295652	0.309964
Sumo2	283	3.28085e-21	1.06964e-19	0.452364	0.17431
Rad51ap1	283	4.36923e-18	1.14233e-16	0.118196	0.116528
Ppa1	284	3.49129e-21	1.13483e-19	0.522541	0.307924
Uchl3	285	3.58461e-21	1.16167e-19	0.456381	0.307525
Zfand2a	285	2.03759e-17	5.09349e-16	-0.220582	0.304592
Trip13	286	2.90556e-20	8.9093e-19	0.16717	0.155545
Cox18	287	3.79369e-21	1.22211e-19	0.314144	0.243694
Uchl5	287	2.90847e-19	8.2628e-18	0.351327	0.324246
Tsen34	288	3.8453e-21	1.23336e-19	0.449833	0.264681
Brca1	288	3.33984e-17	8.16037e-16	0.10851	0.119266
Acp1	289	4.29276e-21	1.37064e-19	0.400404	0.228307
Nppb	289	3.54275e-17	8.61725e-16	-0.313743	0.421939
Hmga1b	291	4.27008e-17	1.03168e-15	0.210678	0.320091
Rnf187	292	5.53948e-21	1.7532e-19	0.437251	0.237519
Snrpd1	293	5.86068e-21	1.84945e-19	0.483903	0.410102
Cox8a	293	4.66721e-17	1.12512e-15	0.296869	0.322951
Ppp1ca	294	6.18249e-21	1.94533e-19	0.487091	0.2499
Chaf1b	295	9.95897e-21	3.09758e-19	0.216473	0.195785
Pola1	296	8.94838e-21	2.79128e-19	0.266824	0.198569
Arid5a	296	5.59349e-17	1.33357e-15	0.16015	0.28129
Eloc	297	5.56996e-20	1.67006e-18	0.468734	0.395314
Ssu72	298	1.12009e-20	3.47389e-19	0.45671	0.235188
Cdc6	298	6.94271e-17	1.64078e-15	0.105697	0.115314
Mrpl58	299	1.33813e-20	4.13825e-19	0.362185	0.173551
Batf3	299	7.32394e-17	1.72711e-15	0.119108	0.171246
Atp5h	300	1.50984e-20	4.65599e-19	0.449329	0.192266
Haus4	300	7.53808e-17	1.77374e-15	0.171226	0.180421
Ncapd3	301	7.92456e-17	1.86064e-15	0.126083	0.142472
E2f7	303	1.06315e-16	2.46943e-15	0.112392	0.118311
Mrps14	305	2.99224e-20	9.14914e-19	0.481539	0.229034
Uqcc2	305	1.1805e-16	2.72019e-15	0.425085	0.418585
Mcm2	306	3.30464e-20	1.00476e-18	0.215079	0.170327
Ssrp1	307	3.65008e-20	1.10359e-18	0.443544	0.281193
Hmg20b	307	4.09588e-17	9.91809e-16	0.371463	0.36301
Pdcd5	308	4.65212e-20	1.40263e-18	0.472342	0.284605
Ndufs6	309	5.11572e-20	1.53813e-18	0.459926	0.337842
Cenpk	309	1.85983e-16	4.21147e-15	0.131378	0.131823
Tmem54	310	3.134e-18	8.33474e-17	0.319203	0.295898
Psmb4	312	6.17878e-20	1.8424e-18	0.475721	0.400222
Mxd3	313	3.88267e-19	1.09443e-17	0.13978	0.130967
Abl2	314	3.00048e-16	6.71017e-15	-0.0654928	0.34094
Fosb	315	3.17032e-16	7.06081e-15	-0.0876814	0.429155
Snrpb	316	7.00749e-20	2.07778e-18	0.431412	0.376782
Poc1a	317	2.03031e-16	4.58791e-15	0.123227	0.120879
Plk1	319	1.18116e-16	2.72019e-15	0.117824	0.116006
Timm13	320	3.42821e-18	9.09484e-17	0.429518	0.368608
Gcat	321	3.03352e-16	6.77006e-15	0.342922	0.33368
Brca2	322	1.08363e-19	3.16152e-18	0.158529	0.13759
Tspo	322	6.40146e-16	1.40262e-14	0.309701	0.431412
Inhba	323	7.07684e-16	1.54124e-14	-0.398519	0.555991
Itpa	325	1.42851e-19	4.14535e-18	0.328875	0.190003
Zfp91	326	1.8689e-19	5.40881e-18	0.410243	0.205427
Ndufs4	327	1.89787e-19	5.47801e-18	0.453549	0.109543
Pimreg	327	7.73539e-16	1.67456e-14	0.11921	0.120293
Mrpl21	328	2.39455e-19	6.87497e-18	0.4357	0.11052
Nuf2	328	3.26679e-17	7.99994e-16	0.116632	0.113503
Nudc	329	4.73155e-19	1.33024e-17	0.449883	0.385247
Gins4	330	2.66057e-19	7.61852e-18	0.315256	0.249039
Polr2f	331	2.71569e-19	7.75584e-18	0.452771	0.243509
Mcm7	331	1.28516e-15	2.73831e-14	0.297914	0.294017
Mrpl11	332	2.84704e-19	8.10956e-18	0.380572	0.155158
Tpm3-rs7	332	1.42246e-15	3.01306e-14	0.408734	0.39154
Larp7	333	1.81292e-16	4.11385e-15	0.326979	0.310649
Park7	334	3.55718e-19	1.00793e-17	0.48485	0.173081
Mnd1	334	3.43185e-17	8.36629e-16	0.232518	0.218545
Ptges3	335	3.08507e-17	7.57207e-16	0.434653	0.379231
Aprt	336	1.90261e-17	4.76857e-16	0.425048	0.379591
Nans	338	5.46836e-19	1.53341e-17	0.369889	0.245385
Vrk1	339	1.45509e-17	3.6885e-16	0.273543	0.248919
Ptpn18	340	7.13243e-19	1.98461e-17	0.25532	0.161418
Fam111a	340	1.72427e-16	3.9209e-15	0.121484	0.117868
Mtap	341	7.26357e-19	2.01094e-17	0.509382	-0.0691643
Rexo2	341	3.28095e-15	6.72594e-14	0.371619	0.37115
Eif3c	342	7.26422e-19	2.01094e-17	0.460627	0.244842
Chac1	342	3.35342e-15	6.86152e-14	0.167195	0.201428
Bola3	343	8.68346e-19	2.3916e-17	0.35721	0.235448
Fam216a	344	9.2633e-19	2.54482e-17	0.356258	0.30881
Arhgap11a	344	4.07116e-15	8.26758e-14	0.119244	0.127826
Nudt5	345	9.76382e-19	2.66878e-17	0.320317	0.192256
Rnaseh2a	346	1.16136e-18	3.16638e-17	0.295072	0.236092
Rpa3	346	1.42108e-16	3.25884e-15	0.316727	0.30134
Tcf19	348	6.35447e-15	1.27845e-13	0.129373	0.130558
Hnrnpd	349	1.41925e-18	3.85012e-17	0.430474	0.334439
Alad	350	1.55758e-18	4.2148e-17	0.322762	0.21106
Rgs16	350	7.72837e-15	1.54624e-13	0.174955	0.222685
Pcna	351	1.56433e-18	4.22252e-17	0.382826	0.315289
Jund	351	7.81062e-15	1.55695e-13	0.00548704	0.377297
Cwc15	353	2.09722e-18	5.63283e-17	0.431668	0.323907
Klf6	354	9.35146e-15	1.85046e-13	-0.292181	0.511651
Gars	355	2.32658e-15	4.8059e-14	0.343294	0.326392
Cisd2	356	9.47872e-15	1.87222e-13	0.359528	0.358169
Anapc15	357	3.09124e-18	8.24128e-17	0.211879	0.17303
Tex30	357	9.84606e-15	1.9377e-13	0.204057	0.263074
Mastl	358	1.09783e-14	2.14882e-13	0.104236	0.107165
Carhsp1	359	1.13324e-14	2.21412e-13	0.309046	0.362629
Cdkn2aipnl	361	3.93759e-18	1.03448e-16	0.295763	0.123353
Ubald2	363	5.23017e-18	1.36413e-16	0.455321	0.350376
Cbx1	364	5.55681e-18	1.44237e-16	0.429862	0.116683
Arl4a	364	1.53317e-14	2.94552e-13	0.104888	0.242919
Psmb8	365	5.68478e-18	1.47206e-16	0.443238	0.109607
E2f8	365	1.60312e-14	3.06035e-13	0.230421	0.284571
Psmb10	366	5.93797e-18	1.5303e-16	0.502015	0.25245
Ing2	367	1.99348e-14	3.7855e-13	0.140987	0.2626
Lsm7	368	9.58954e-18	2.46549e-16	0.42205	0.143788
Ube2d3	368	2.0303e-14	3.84867e-13	0.162359	0.335406
Pgs1	369	1.07636e-17	2.74776e-16	0.316967	0.117286
Btg1	369	2.08177e-14	3.93724e-13	-0.437148	0.416924
Cops6	370	1.39496e-17	3.54436e-16	0.435979	0.186525
Psma3	370	2.08429e-14	3.93724e-13	0.351628	0.347311
Rgs3	371	2.18758e-14	4.12516e-13	0.171791	0.206419
Snrpc	372	1.49197e-17	3.77316e-16	0.431917	0.269385
Sigirr	372	1.18464e-14	2.30621e-13	0.250374	0.244046
Haus1	373	1.66812e-17	4.19901e-16	0.197362	0.16526
Haus6	375	1.9032e-17	4.76857e-16	0.150376	0.132167
Vcpkmt	375	3.21631e-14	6.02306e-13	0.258056	0.275989
Dscc1	376	2.05462e-17	5.12423e-16	0.126167	0.112204
Tob1	376	3.38605e-14	6.32999e-13	-0.114348	0.209205
Phf5a	377	2.26713e-17	5.64124e-16	0.384525	0.24446
Nasp	377	1.76502e-14	3.35757e-13	0.346501	0.337832
Trib3	378	2.3012e-17	5.71288e-16	0.198827	0.165569
Ndc1	378	2.56972e-17	6.3359e-16	0.155205	0.142027
Scoc	379	2.34266e-17	5.8025e-16	0.304154	0.139791
Mrpl54	380	2.52398e-17	6.23735e-16	0.423814	0.324234
Ubd	380	9.24173e-17	2.15587e-15	0.400373	0.367426
Exosc1	382	2.72501e-17	6.70352e-16	0.315701	0.0870781
AU020206	382	4.9642e-14	9.12267e-13	0.142215	0.162452
Fignl1	383	1.9922e-15	4.14683e-14	0.100893	0.0988728
Cebpg	384	6.12646e-14	1.10891e-12	0.232316	0.296381
S100a6	385	6.15133e-14	1.11155e-12	0.233354	0.363973
Tap1	386	4.05356e-17	9.83761e-16	0.403173	0.217889
Pbld1	386	7.54137e-14	1.34477e-12	0.173347	0.19883
Jpt1	388	5.08821e-17	1.22388e-15	0.445567	0.185523
Epha2	388	7.71234e-14	1.373e-12	-0.0176111	0.305092
Ndufa2	389	5.10665e-17	1.2256e-15	0.431025	0.357023
Spata7	389	8.52838e-14	1.51082e-12	0.428409	0.483005
Med30	390	5.35189e-17	1.28161e-15	0.297358	0.208884
Fmc1	391	5.45731e-17	1.30397e-15	0.271353	0.167033
Aars	391	9.29128e-14	1.62733e-12	0.223922	0.23327
Gtf2h5	392	5.64416e-17	1.34269e-15	0.401089	0.247596
Zfp367	393	4.27157e-15	8.65833e-14	0.126949	0.121516
Gpx1	394	6.85838e-17	1.62796e-15	0.433173	0.277222
Atp5e	395	6.91752e-17	1.63841e-15	0.423447	0.347163
Lrr1	395	2.70965e-15	5.56533e-14	0.0984557	0.0951929
Mrpl15	396	8.5809e-17	2.01038e-15	0.348698	0.213208
Arhgdia	397	9.07836e-17	2.12234e-15	0.429912	0.315125
Neil3	398	1.82239e-15	3.80803e-14	0.0972883	0.0926266
Smc1a	399	9.54201e-17	2.22113e-15	0.397895	0.232679
Dazap1	400	1.0907e-16	2.52799e-15	0.395085	0.320211
Cby1	401	1.1498e-16	2.65927e-15	0.23502	0.193483
Ccne1	401	8.59168e-14	1.51707e-12	0.114014	0.11346
Htra1	402	1.40948e-13	2.41396e-12	0.205733	0.412265
Rpp30	403	1.38583e-16	3.18476e-15	0.258788	0.22463
Exo1	403	1.43129e-13	2.44744e-12	0.0938407	0.0969238
Xrcc1	404	1.46865e-13	2.50736e-12	0.09615	0.150914
Trir	405	1.43844e-16	3.29168e-15	0.411509	0.291129
Med28	406	1.45158e-16	3.31474e-15	0.423727	0.17667
Gemin6	406	3.85466e-15	7.84264e-14	0.189982	0.17603
Fam96a	407	1.67546e-16	3.81793e-15	0.346588	0.215291
Sgk1	408	1.67771e-13	2.84186e-12	-0.267407	0.478073
Spag5	409	2.84658e-16	6.39241e-15	0.120132	0.112237
Kdm6b	410	1.89294e-13	3.1865e-12	-0.135564	0.290739
Pold2	411	2.42937e-16	5.47822e-15	0.3015	0.252107
Abcb1b	411	1.94783e-13	3.2738e-12	0.113283	0.204877
Phb2	412	2.71455e-16	6.10858e-15	0.419491	0.228102
Hspa4l	412	2.25292e-13	3.75164e-12	-0.112394	0.321938
Spdl1	413	6.75753e-14	1.21098e-12	0.116347	0.112506
Tbrg1	414	2.9193e-16	6.54214e-15	0.444323	0.200147
Brd2	414	2.3683e-13	3.93167e-12	-0.0401805	0.386586
Commd3	415	3.52223e-16	7.82847e-15	0.385757	0.0968544
Gprc5a	415	2.58533e-13	4.27883e-12	-0.0728354	0.210928
Rad50	417	3.83319e-16	8.50214e-15	0.28871	0.181155
Mns1	418	3.28431e-13	5.38924e-12	0.126446	0.12587
Mcub	419	3.37212e-13	5.51356e-12	0.130267	0.216981
Mrps18a	420	4.60573e-16	1.01948e-14	0.369888	0.162888
Bax	421	4.78717e-16	1.05748e-14	0.409329	0.245337
Cttnbp2nl	421	3.89501e-13	6.31132e-12	0.187066	0.327443
Nmi	422	5.53297e-16	1.21973e-14	0.382305	0.188291
Ung	423	5.85707e-16	1.28856e-14	0.164965	0.125929
Chchd10	423	4.03858e-13	6.53417e-12	0.182719	0.24485
Mrps17	424	5.88095e-16	1.29118e-14	0.370256	0.117246
Tmem107	425	6.46746e-16	1.41422e-14	0.231957	0.186746
Cep57	426	6.59213e-16	1.43857e-14	0.366071	0.275409
Efcab11	426	6.89138e-14	1.23293e-12	0.0971683	0.094581
Cdc7	427	4.91964e-13	7.90062e-12	0.0918449	0.102585
Tmem234	428	7.11786e-16	1.54706e-14	0.384704	0.176344
Gchfr	428	4.99949e-13	7.99328e-12	0.124854	0.162608
Coa3	429	7.42679e-16	1.61097e-14	0.344345	0.213844
Lat2	429	5.12435e-13	8.16877e-12	0.0723497	0.0942087
Set	430	7.80411e-16	1.68606e-14	0.388721	0.232395
AA467197	430	1.37162e-13	2.35658e-12	0.501113	0.496783
Rbm8a	431	5.56212e-13	8.84058e-12	0.321092	0.35221
Smc6	432	8.13034e-16	1.75304e-14	0.438912	0.265626
Nek2	432	5.64115e-13	8.93995e-12	0.0933094	0.0921559
Mrpl40	433	9.06044e-16	1.94971e-14	0.312223	0.23862
Mms22l	433	6.49603e-13	1.01755e-11	0.109776	0.113783
Ywhae	435	9.7823e-16	2.10086e-14	0.35538	0.156202
Cdk5rap2	435	6.02973e-13	9.52786e-12	0.15641	0.154965
Fancl	436	1.0333e-15	2.21475e-14	0.169375	0.116007
Casp8ap2	437	1.12807e-15	2.41308e-14	0.255654	0.125176
Aif1l	437	7.79706e-13	1.21084e-11	0.151736	0.157251
Kpnb1	438	1.27932e-15	2.73124e-14	0.342772	0.228077
Creld2	438	7.93202e-13	1.23003e-11	0.243574	0.25329
Mrpl27	439	1.3049e-15	2.7749e-14	0.36405	0.239205
Ino80c	440	1.34565e-15	2.85595e-14	0.1933	0.145521
Irf1	440	8.37796e-13	1.29547e-11	0.318906	0.315216
Cars	441	8.58623e-13	1.32389e-11	0.166745	0.23973
Psmb3	442	1.48589e-15	3.14126e-14	0.425006	0.231368
Etv4	443	1.49251e-15	3.14365e-14	0.257151	0.19164
Angptl2	443	9.2244e-13	1.41825e-11	0.146723	0.247679
Gbp4	444	1.49283e-15	3.14365e-14	0.454778	0.251147
Acsbg1	444	9.65199e-13	1.48189e-11	0.113976	0.216295
Rangap1	445	1.00953e-12	1.54557e-11	0.138189	0.25341
Cox6c	446	1.54838e-15	3.25431e-14	0.41837	0.303514
Dusp18	446	1.01189e-12	1.54699e-11	0.22707	0.287939
Ndufv2	447	1.61007e-15	3.37739e-14	0.399468	0.177677
Il11	447	1.02163e-12	1.55773e-11	-0.18114	0.21873
Mrpl12	448	1.68818e-15	3.5344e-14	0.403045	0.204622
Gadd45g	448	1.02179e-12	1.55773e-11	0.119159	0.359813
Slc1a5	449	1.03308e-12	1.57273e-11	0.204752	0.214276
Ppp1r15a	450	1.06171e-12	1.61404e-11	-0.0734918	0.270532
Tmem126a	451	1.92719e-15	4.01924e-14	0.284186	0.219242
Pole	451	6.63541e-15	1.3325e-13	0.114418	0.107352
Prdx6	453	2.09749e-15	4.35762e-14	0.459908	0.30313
Ddit4	453	1.21479e-12	1.84158e-11	0.0700324	0.251674
Ndufb6	454	2.1273e-15	4.41108e-14	0.401643	0.238779
Mrps15	455	2.17317e-15	4.4976e-14	0.351142	0.212283
Adamts1	455	1.33525e-12	2.01291e-11	-0.205729	0.278886
Alg14	456	1.46678e-12	2.19895e-11	0.130456	0.163213
Rnf168	457	2.53757e-15	5.23175e-14	0.190052	0.10235
Siah2	457	1.53523e-12	2.29204e-11	0.0891302	0.245874
Nsmce4a	459	2.68599e-15	5.52722e-14	0.311601	0.236315
Map2k3	460	1.8928e-12	2.81811e-11	0.11789	0.377185
Gyg	461	3.47859e-15	7.10421e-14	0.218784	0.166017
Mbd3	462	3.77802e-15	7.70118e-14	0.382724	0.191227
Hax1	463	1.40716e-12	2.11249e-11	0.301693	0.298101
Rpl8	465	1.25719e-12	1.90319e-11	0.238098	0.218536
Nabp2	466	5.65881e-15	1.14488e-13	0.26761	0.183023
Enkd1	467	5.78355e-15	1.16793e-13	0.162996	0.107938
Ncapd2	467	2.29163e-13	3.81023e-12	0.113634	0.111394
Procr	468	3.24972e-12	4.75981e-11	-0.0786526	0.258554
Cfap36	469	6.14367e-15	1.23835e-13	0.28824	0.205944
Oard1	469	4.09045e-12	5.95895e-11	0.176866	0.187454
Tpm3	470	3.28612e-13	5.38924e-12	0.378775	0.339618
Calm3	471	6.89015e-15	1.38109e-13	0.376011	0.261249
Med9	472	7.79595e-15	1.55689e-13	0.262809	0.155874
Stoml2	473	8.58551e-15	1.70826e-13	0.284148	0.154561
Fam110a	473	5.51429e-12	7.94763e-11	0.0598314	0.144201
Tsfm	474	9.02575e-15	1.79256e-13	0.242165	0.114004
Cdc25c	474	9.26221e-15	1.83616e-13	0.110789	0.102787
Mrfap1	475	3.02967e-12	4.44954e-11	0.337937	0.308478
1110004E09Rik	476	9.62157e-15	1.89698e-13	0.333545	0.252426
Ndufc2	477	1.01229e-14	1.98857e-13	0.385594	0.0990045
Dhrs7b	477	3.7944e-12	5.53512e-11	0.2098	0.205391
Brip1	478	1.01533e-14	1.99093e-13	0.114584	0.102885
Sox9	478	7.4722e-12	1.0642e-10	-0.205549	0.413007
Tomm22	480	1.17196e-14	2.28564e-13	0.390063	0.200687
Cyp2c55	481	8.43015e-12	1.19278e-10	0.0754526	0.101484
Ctcf	482	1.19037e-14	2.31321e-13	0.345911	0.23009
Gbp2b	482	8.51152e-12	1.20272e-10	0.368155	0.431899
Stat1	483	1.26141e-14	2.44686e-13	0.426356	0.251741
Elob	484	1.33636e-14	2.58762e-13	0.389152	0.205117
Hjurp	485	1.38797e-14	2.68275e-13	0.242192	0.205545
Klf5	485	9.61009e-12	1.35266e-10	-0.288634	0.386321
Ndufa9	486	1.39902e-14	2.69929e-13	0.289479	0.136065
Mid1ip1	486	1.06281e-11	1.48821e-10	0.124667	0.13965
Slc35b1	487	1.51235e-14	2.91276e-13	0.266133	0.205774
Aurka	487	8.14271e-13	1.2609e-11	0.117438	0.11275
Snf8	488	1.5348e-14	2.94552e-13	0.364416	0.153349
Lmna	488	1.10199e-11	1.54108e-10	0.0326024	0.289342
Fxn	489	1.54749e-14	2.96461e-13	0.259387	0.128333
Mrps28	490	1.58936e-14	3.03944e-13	0.346543	0.201634
Emg1	492	1.7159e-14	3.26989e-13	0.388075	0.139787
Blm	492	4.85889e-13	7.81465e-12	0.0964149	0.092545
Nup37	494	2.5931e-14	4.88134e-13	0.163639	0.121721
Ncaph2	494	1.2999e-11	1.8085e-10	0.214943	0.23815
Chmp6	495	2.76083e-14	5.18806e-13	0.279385	0.186254
Ska2	496	2.76926e-14	5.19488e-13	0.138785	0.0939746
Skil	496	1.37977e-11	1.9098e-10	-0.0699304	0.275756
Tmem128	497	7.34596e-12	1.0476e-10	0.296471	0.290926
Nup43	498	3.73966e-14	6.97898e-13	0.18924	0.0993007
Ssbp1	499	3.77977e-14	7.04169e-13	0.290455	0.105877
Ncaph	499	5.63491e-14	1.02854e-12	0.0943981	0.0880884
Dynll2	500	3.80753e-14	7.08123e-13	0.351814	0.232411
Pold1	500	1.37792e-12	2.07147e-11	0.137401	0.132024
Exoc3l4	501	4.00727e-14	7.43991e-13	0.25079	0.222682
Hspa1b	501	1.96297e-11	2.69292e-10	-0.242336	0.233825
Shmt1	502	4.06669e-14	7.5373e-13	0.169411	0.100227
Ndufa3	503	4.34618e-14	8.04154e-13	0.28368	0.129654
Gins3	504	1.20615e-11	1.68457e-10	0.107879	0.107937
Suz12	505	4.53447e-14	8.37561e-13	0.311083	0.207924
Lmnb1	505	4.11923e-12	5.99281e-11	0.218872	0.209702
Phf11d	506	4.67864e-14	8.62718e-13	0.291656	0.156019
Hddc2	507	4.9543e-14	9.11996e-13	0.317129	0.0638595
Emp3	507	2.41674e-11	3.29457e-10	0.261891	0.365327
Ndufb7	508	5.11055e-14	9.37569e-13	0.387951	0.0469611
Ccne2	508	8.40473e-13	1.29776e-11	0.106587	0.100657
Uqcrb	509	5.47112e-14	1.00202e-12	0.374686	0.230536
Oaf	509	2.6334e-11	3.5764e-10	0.326465	0.41124
Lage3	510	5.61099e-14	1.0259e-12	0.270355	0.180546
Mis12	510	2.77193e-11	3.74574e-10	0.145834	0.169979
Ewsr1	511	3.04411e-11	4.10329e-10	0.291882	0.31385
Nars	512	4.92722e-13	7.90107e-12	0.3533	0.309933
Anapc5	513	5.77251e-14	1.05188e-12	0.387029	0.16947
Vdac3	515	5.84047e-14	1.06247e-12	0.395196	0.162352
Atf5	515	3.469e-11	4.64708e-10	0.230865	0.28231
Rex1bd	516	5.92648e-14	1.07631e-12	0.38775	0.196499
Pmvk	516	3.77941e-11	5.03797e-10	0.228668	0.229547
Hist2h2ac	517	6.03443e-14	1.09408e-12	0.105577	0.091547
Grap	517	3.83788e-11	5.10962e-10	0.103106	0.119517
Hist1h4d	518	6.19008e-14	1.11669e-12	0.127594	0.114068
Mis18bp1	518	1.94727e-11	2.67478e-10	0.106226	0.104864
Rnaseh2c	519	6.21483e-14	1.11929e-12	0.320636	0.226074
Tmem192	519	4.50415e-11	5.94548e-10	0.219317	0.236964
Tmem40	520	4.56691e-11	6.01589e-10	0.0214522	0.210561
Timm17b	521	6.42268e-14	1.1548e-12	0.284748	0.225524
Ube2m	522	6.69385e-14	1.20156e-12	0.326023	0.275165
5430416N02Rik	522	4.70629e-11	6.18966e-10	0.10024	0.238569
Ugdh	523	4.78374e-11	6.27626e-10	-0.013318	0.244569
Ndufa11	525	7.34262e-14	1.31149e-12	0.371685	0.267639
Suv39h2	527	2.7476e-11	3.71751e-10	0.169314	0.168899
Polr2g	528	8.23267e-14	1.46323e-12	0.362035	0.186997
Commd1	529	8.41489e-14	1.49316e-12	0.383994	0.159041
Zfp948	529	5.53801e-11	7.21341e-10	0.139865	0.148118
Ifi35	530	8.58719e-14	1.51707e-12	0.407471	0.168876
Me2	530	7.73129e-13	1.20235e-11	0.127072	0.117239
Vdac1	531	8.60743e-14	1.51738e-12	0.37796	0.272353
Xpo1	531	1.06526e-13	1.84191e-12	0.244719	0.215019
Mrpl55	532	8.64824e-14	1.52209e-12	0.249743	0.113468
Snx3	532	6.28859e-11	8.1714e-10	0.1845	0.326278
Timm22	533	8.87939e-14	1.5588e-12	0.280167	0.0807905
Pola2	534	8.88561e-14	1.5588e-12	0.138905	0.120208
Ccnl1	534	7.30719e-11	9.43831e-10	-0.381856	0.363574
Ndufa12	535	9.57618e-14	1.67452e-12	0.408029	0.148712
Lrrc59	535	7.37453e-11	9.50261e-10	0.312663	0.321112
Itga3	536	9.63405e-14	1.68192e-12	0.355522	0.182978
Nes	536	7.42371e-11	9.5546e-10	0.205978	0.207098
Rnaseh2b	537	9.7919e-14	1.70672e-12	0.200659	0.119916
Mrps11	537	7.21688e-12	1.03055e-10	0.210133	0.198136
Prmt1	538	9.86726e-14	1.71709e-12	0.397413	0.108563
Ndufaf6	539	9.97753e-14	1.7335e-12	0.165656	0.102303
Ppard	539	8.35894e-11	1.072e-09	0.0500577	0.192696
Mrpl52	540	1.04186e-13	1.80723e-12	0.3645	0.257178
Pla2g12a	540	8.37736e-11	1.0731e-09	0.13753	0.185955
Fkbp1a	541	1.05593e-13	1.82871e-12	0.389245	0.29639
Depdc1a	542	9.74983e-12	1.37055e-10	0.0805288	0.0787069
Ddx46	543	1.17713e-13	2.03209e-12	0.35129	0.221503
Kif2c	543	9.16774e-11	1.17157e-09	0.0688314	0.0767743
Nfic	544	1.22646e-13	2.11389e-12	0.263692	0.121215
Cenpi	544	7.3345e-13	1.14393e-11	0.0731406	0.0687409
Uxt	545	1.30789e-13	2.25065e-12	0.223424	0.168262
BC030867	545	9.44828e-11	1.20599e-09	0.0576898	0.0626141
Slc25a4	546	3.24465e-12	4.75883e-11	0.358342	0.316012
Mtbp	547	1.39127e-13	2.38654e-12	0.123054	0.104231
Rer1	548	1.49022e-13	2.5385e-12	0.374607	0.247629
Traip	548	4.02122e-11	5.34421e-10	0.079887	0.0779418
Akr1b3	549	1.49158e-13	2.5385e-12	0.293993	0.149809
Chtf18	549	1.15782e-10	1.46063e-09	0.0620239	0.0656138
Nme6	550	1.53887e-13	2.61486e-12	0.180583	0.123678
Mrpl17	551	1.58801e-13	2.69415e-12	0.335905	0.192126
Metrn	552	1.69116e-13	2.86017e-12	0.123574	0.0944266
Rpl30	552	1.39757e-10	1.73877e-09	0.20007	0.221823
Mre11a	554	1.77155e-13	2.99147e-12	0.18395	0.149521
Cdc45	554	1.50504e-10	1.86469e-09	0.103407	0.139384
Parp1	555	1.86925e-13	3.15152e-12	0.220721	0.0873872
Hspa9	555	1.50639e-10	1.86469e-09	0.175689	0.331876
Asna1	556	2.01695e-13	3.38473e-12	0.307493	0.167512
Gem	556	1.52322e-10	1.87783e-09	0.0101272	0.14861
Ndufaf2	557	2.06694e-13	3.46325e-12	0.25085	0.166763
Zgrf1	557	1.57461e-10	1.93897e-09	0.0638297	0.071916
Srsf9	558	2.10144e-13	3.5156e-12	0.327616	0.184603
Siah1b	558	1.58117e-10	1.94484e-09	0.102559	0.108935
Bcas2	559	1.59154e-10	1.95538e-09	0.285859	0.310068
Samm50	561	2.13561e-13	3.56727e-12	0.284013	0.168369
Gnb2	561	2.03939e-12	3.02803e-11	0.352161	0.30769
Arpc5l	562	2.16676e-13	3.61371e-12	0.339035	0.157047
Mcm8	563	3.2079e-11	4.31322e-10	0.0667635	0.0644125
Slirp	564	1.81509e-10	2.21744e-09	0.271855	0.284959
Srsf1	565	2.40326e-13	3.9836e-12	0.310924	0.154359
Herpud1	565	2.24614e-10	2.71342e-09	0.152691	0.191927
Dok1	566	2.60837e-13	4.31038e-12	0.260189	-0.0215909
Tuba4a	566	2.41965e-10	2.91651e-09	0.027672	0.316405
Txn2	567	2.84219e-13	4.68961e-12	0.317042	0.172073
Rrad	567	2.60756e-10	3.13603e-09	0.134323	0.169704
Mrpl34	568	3.18016e-13	5.23928e-12	0.311332	0.0437268
Pam16	568	2.62706e-10	3.15598e-09	0.206587	0.210792
Rbl1	569	3.26863e-13	5.37685e-12	0.119528	0.0951212
Itgb1bp1	570	2.9025e-10	3.47914e-09	0.2425	0.252744
Atp5j	571	3.29986e-13	5.40359e-12	0.357789	0.223683
Cdv3	571	2.93244e-10	3.51114e-09	0.149403	0.317548
Rpl19	572	3.43463e-13	5.60731e-12	0.224469	0.162179
Ndufa4	573	3.5124e-13	5.72564e-12	0.399975	-0.0261073
Ska3	574	3.54632e-13	5.77223e-12	0.0820376	0.0725507
Bub1b	574	4.41515e-12	6.41471e-11	0.0791306	0.0745504
Creb5	575	3.38861e-10	4.04391e-09	0.0552133	0.227239
Gtf3a	576	3.76686e-13	6.122e-12	0.297649	0.140886
Gjb3	576	3.53241e-10	4.20163e-09	0.195518	0.304433
Atp5k	577	3.77869e-13	6.13201e-12	0.343372	0.217201
Isy1	577	3.54428e-10	4.21112e-09	0.173691	0.195758
Mydgf	578	4.15137e-13	6.70311e-12	0.348146	0.136318
Kif20a	578	2.0103e-11	2.75436e-10	0.0839697	0.0801304
Cnn2	579	4.15539e-13	6.70311e-12	0.3721	0.240352
Hspa14	580	4.65054e-13	7.4907e-12	0.202966	0.119956
Dusp2	580	3.66527e-10	4.3501e-09	0.0636973	0.134457
Dnajb11	582	4.32693e-10	5.09627e-09	0.208514	0.228192
Irak1bp1	584	4.9697e-13	7.9574e-12	0.181606	0.136798
Plin2	585	5.08352e-13	8.11564e-12	0.368041	0.183588
Rgcc	585	4.72697e-10	5.54931e-09	0.0301794	0.183945
Cmss1	586	5.39029e-13	8.58008e-12	0.192412	0.150986
Tbc1d31	586	5.02851e-10	5.87781e-09	0.0828152	0.094905
Psma4	587	5.58184e-13	8.85892e-12	0.39871	0.0592057
Ndufs3	588	5.77273e-13	9.13509e-12	0.339699	0.189106
Gde1	588	1.51417e-10	1.87093e-09	0.22171	0.210336
Tmem147	589	6.12332e-13	9.66163e-12	0.334558	0.219798
Cbx5	590	6.17059e-13	9.71089e-12	0.255828	0.0858268
Fkbp11	590	6.21483e-10	7.18689e-09	0.216928	0.215049
Atpif1	591	6.17248e-13	9.71089e-12	0.357511	0.123283
Ccdc12	591	6.57293e-10	7.59289e-09	0.241168	0.296527
Coq7	592	6.27237e-13	9.85372e-12	0.208267	0.168815
Mirt1	592	6.61865e-10	7.63756e-09	0.131106	0.18009
Ulbp1	593	6.3473e-13	9.95698e-12	0.124531	0.109003
Pcolce2	593	6.76842e-10	7.79376e-09	0.0288491	0.289293
Ndufb5	594	6.83584e-13	1.06924e-11	0.361437	0.25355
H2-DMa	595	6.99996e-13	1.09333e-11	0.430134	0.186514
Nmral1	595	1.30338e-11	1.81084e-10	0.148965	0.134464
Fam220a	596	7.31842e-10	8.40027e-09	0.275742	0.279007
Ercc1	597	7.38115e-13	1.14955e-11	0.420605	0.287815
Rbbp8	597	7.44109e-10	8.53202e-09	0.119945	0.215734
Rpp21	598	1.74891e-11	2.41148e-10	0.247469	0.217058
Anapc16	599	3.88753e-10	4.60883e-09	0.260853	0.249433
Ier5	600	7.82058e-10	8.94819e-09	-0.295136	0.338674
Eme1	601	7.93242e-10	9.05702e-09	0.0540642	0.0606462
Manf	602	9.13289e-13	1.40618e-11	0.404482	0.318632
Flywch2	602	2.47681e-11	3.36796e-10	0.246377	0.223949
Dbnl	603	9.73953e-13	1.49321e-11	0.265799	-0.00613781
Ttc39c	605	8.81355e-10	1.00208e-08	0.110446	0.175891
Psmc3	606	8.8585e-10	1.00508e-08	0.200435	0.292244
Mrpl36	607	1.1668e-12	1.7713e-11	0.264049	0.0609908
Churc1	607	9.52713e-10	1.07755e-08	0.245262	0.256309
Cuta	608	4.93988e-10	5.78046e-09	0.300195	0.28271
Nelfe	609	1.32595e-12	2.00448e-11	0.240909	0.153633
Dsn1	609	1.13356e-09	1.27279e-08	0.0705715	0.0764703
Naa10	610	1.33462e-12	2.01291e-11	0.283927	0.142892
Ak2	611	1.34684e-12	2.02756e-11	0.384657	0.191306
Snhg12	611	1.18418e-09	1.3255e-08	0.134108	0.300211
Timm17a	613	1.49192e-12	2.23354e-11	0.353912	0.143177
Btg2	613	1.38735e-09	1.54493e-08	0.0805829	0.203104
Slc25a11	614	1.50915e-12	2.25623e-11	0.270452	0.106067
Fam136a	615	1.72602e-12	2.57334e-11	0.258805	0.00543183
Il1a	615	1.41871e-09	1.57499e-08	-0.392728	0.274408
Emc8	616	1.92734e-12	2.86559e-11	0.308645	0.0946833
Jmjd1c	617	1.50004e-09	1.66186e-08	-0.231444	0.29898
Snrpd2	619	2.08592e-12	3.09287e-11	0.366633	0.177322
Acot7	619	1.60451e-09	1.77217e-08	0.154969	0.288272
Hikeshi	620	2.18128e-12	3.22985e-11	0.274494	0.203062
Ndufa10	621	2.33619e-12	3.45449e-11	0.337938	0.20519
Aes	622	2.34433e-12	3.4618e-11	0.366174	0.13968
Yars	622	3.41437e-11	4.57957e-10	0.169758	0.154968
Mrpl35	623	2.36523e-12	3.48791e-11	0.313117	0.148175
Rps20	623	1.66552e-09	1.83394e-08	0.0389397	0.192483
Gatm	624	1.72671e-09	1.89361e-08	0.0583223	0.0922774
Bora	625	1.84321e-09	2.01728e-08	0.0968804	0.112636
Gen1	626	9.94094e-11	1.26292e-09	0.0681559	0.0651234
Rab5c	627	2.7672e-12	4.07513e-11	0.338662	0.207092
Iqgap3	627	1.08519e-09	1.22228e-08	0.0484673	0.0484673
Erg28	628	2.77275e-12	4.07776e-11	0.25557	0.18993
Bbc3	629	1.6973e-09	1.86324e-08	0.120531	0.117926
Got1	630	2.28813e-09	2.48662e-08	0.120828	0.183467
Podnl1	631	2.61706e-09	2.83271e-08	0.127953	0.135472
Xaf1	632	3.30226e-12	4.83022e-11	0.361547	0.183393
Taf15	633	2.64833e-09	2.8614e-08	0.225843	0.242819
Ten1	634	3.36578e-12	4.91649e-11	0.269848	0.116548
Egr1	634	2.68795e-09	2.89784e-08	0.00597018	0.348428
Sclt1	635	2.90407e-09	3.12462e-08	0.0966071	0.113046
Hist1h3c	637	3.11209e-09	3.3418e-08	0.0703316	0.0713526
Fst	638	4.99335e-12	7.24505e-11	0.242363	0.0831149
Cenpx	639	5.00559e-12	7.25204e-11	0.26011	0.197247
Msh5	639	3.32134e-09	3.55943e-08	0.0433426	0.0686686
Skp2	640	5.01157e-12	7.25204e-11	0.170177	0.0563544
Ticrr	640	3.42326e-09	3.6614e-08	0.0485814	0.052763
Tsn	641	5.03496e-12	7.27616e-11	0.331493	0.0547067
Htra2	642	5.34785e-12	7.71801e-11	0.267976	0.216466
Fam83d	642	3.56167e-09	3.80192e-08	0.0336951	0.0575976
Cep83	643	3.81962e-09	4.06925e-08	0.21495	0.236909
Chchd6	644	5.9209e-12	8.52232e-11	0.234317	0.122695
Plp2	644	3.2118e-11	4.31322e-10	0.370881	0.30873
Polr2e	645	6.22723e-12	8.95133e-11	0.342488	-0.0535175
Map2k3os	645	4.15932e-09	4.41377e-08	0.0869996	0.111982
Rbmx2	646	6.47197e-12	9.2908e-11	0.146546	0.118689
Dedd2	646	4.21432e-09	4.46776e-08	-0.0580108	0.144452
Hist1h4i	647	6.79778e-12	9.74559e-11	0.197031	0.155138
Ghitm	647	4.27228e-09	4.52477e-08	0.108587	0.253562
Eif2s1	648	6.96225e-12	9.96817e-11	0.351829	0.20027
Pycr2	649	7.05875e-12	1.0093e-10	0.235176	0.0656439
mt-Atp6	649	4.61412e-09	4.86302e-08	-0.0199523	0.240697
Gclm	650	4.63112e-09	4.87619e-08	-0.000420881	0.266023
Rcc2	651	7.52654e-12	1.07053e-10	0.261641	0.163829
Hprt	651	8.85544e-10	1.00508e-08	0.283688	0.267146
Rnf19a	652	4.86436e-09	5.10687e-08	0.0200235	0.206897
Ube2l6	653	7.834e-12	1.11274e-10	0.289079	0.210716
Pa2g4	654	7.84385e-12	1.11274e-10	0.355159	0.250322
Dnajc2	655	8.16187e-12	1.15634e-10	0.353192	0.203757
Pde6d	655	2.57907e-10	3.10521e-09	0.193464	0.173975
Axl	656	9.4442e-12	1.33278e-10	0.306914	0.206789
Cyb5r1	657	9.49622e-12	1.33837e-10	0.192974	0.164521
Rpl41	657	6.3261e-09	6.55251e-08	0.184377	0.195248
Zdhhc16	659	9.8564e-12	1.38373e-10	0.234162	0.0804989
Ptpa	660	1.00553e-11	1.40982e-10	0.246144	0.199455
Hnrnpdl	661	6.5723e-09	6.79451e-08	0.106384	0.289384
Dcakd	662	1.26736e-11	1.76777e-10	0.199737	0.0740265
Lmo1	662	6.60405e-09	6.82082e-08	0.07702	0.0869755
Smpdl3b	663	1.29644e-11	1.80601e-10	0.154608	0.0958001
Med7	663	6.7625e-09	6.97117e-08	0.104731	0.2143
Slc39a10	665	1.30493e-11	1.81084e-10	0.121075	0.0754178
Acap1	665	6.91843e-09	7.10484e-08	0.104785	0.148343
Arl6ip4	666	1.35295e-11	1.87507e-10	0.194136	0.0713205
Gfod1	666	7.277e-09	7.4378e-08	-0.0153063	0.125065
Srrt	667	7.41992e-09	7.57671e-08	0.184129	0.213353
Cad	668	1.57983e-11	2.18392e-10	0.126036	0.0645783
Bak1	669	1.58421e-11	2.18718e-10	0.242145	0.152838
Sh3glb1	670	7.87087e-09	8.02206e-08	0.228126	0.264673
Sdhd	671	1.84884e-11	2.54604e-10	0.296759	0.227205
Nrm	672	1.9191e-11	2.63943e-10	0.103303	0.0801566
Nemp1	673	8.60487e-09	8.72089e-08	0.0465822	0.0665186
Hmbs	674	1.02701e-10	1.30168e-09	0.18559	0.162287
Fam96b	675	9.21654e-09	9.31464e-08	0.279509	0.272029
Prdx3	677	2.11744e-11	2.89749e-10	0.271318	0.11325
Vdac2	677	4.8791e-09	5.11738e-08	0.29812	0.283304
Cyb5b	678	2.1657e-11	2.95979e-10	0.235845	0.163182
Raly	678	9.78882e-09	9.86538e-08	0.186719	0.276084
Clpp	679	2.19318e-11	2.99357e-10	0.289201	0.0803232
Nr1d1	679	9.86053e-09	9.91573e-08	0.116932	0.155546
Sass6	680	5.07688e-09	5.29915e-08	0.0660107	0.0655247
Prelid3b	681	2.46065e-11	3.3502e-10	0.259559	0.221336
Rnf126	683	1.262e-10	1.58284e-09	0.254702	0.21853
Psmb6	684	2.73616e-11	3.70951e-10	0.340611	0.0935757
Ncl	685	2.73826e-11	3.70951e-10	0.275559	0.179877
Lysmd3	685	1.15528e-08	1.15571e-07	0.0117366	0.154824
Urgcp	686	1.19631e-08	1.19455e-07	0.0520145	0.149703
Gfer	687	2.78629e-11	3.76045e-10	0.216027	0.0382167
Dohh	688	3.09159e-11	4.16211e-10	0.281475	0.154785
Mcph1	688	9.46097e-10	1.07119e-08	0.118749	0.111197
Ogdh	689	1.23318e-08	1.22909e-07	0.150406	0.166312
Brip1os	690	6.97233e-09	7.14664e-08	0.128671	0.125436
Iigp1	691	1.29237e-08	1.28453e-07	0.265957	0.308807
Psma1	692	3.47392e-11	4.64793e-10	0.338628	0.158148
Samsn1	693	3.61335e-11	4.82851e-10	0.145397	0.113541
Wee1	693	1.3083e-08	1.29561e-07	0.10688	0.141636
Prdx4	694	3.75809e-11	5.01573e-10	0.386398	0.240729
Tceal9	696	4.02396e-11	5.34421e-10	0.405232	0.249459
Bloc1s2	697	4.06009e-11	5.3856e-10	0.266001	0.153084
Rps11	698	4.09079e-11	5.41967e-10	0.231991	0.174164
Cd274	698	1.60802e-08	1.57942e-07	0.0790863	0.125589
Yeats4	699	4.21179e-11	5.57316e-10	0.237071	0.149555
Sema3e	699	1.6139e-08	1.58376e-07	0.0352263	0.128482
Bad	700	4.38193e-11	5.79121e-10	0.271216	0.168793
Fzr1	700	2.49664e-09	2.70778e-08	0.174915	0.163894
Psme2	701	4.56861e-11	6.01589e-10	0.341039	0.121003
Sapcd2	701	1.64772e-08	1.61549e-07	0.0571037	0.0582699
Rps27l	702	4.75598e-11	6.24742e-10	0.32305	0.0778206
Rps3a1	702	1.66197e-08	1.62798e-07	0.0707734	0.175408
Lap3	703	5.19137e-11	6.80283e-10	0.284187	0.119232
Cbx3	704	5.30613e-11	6.94481e-10	0.230156	0.03144
Ndufa8	705	5.38956e-11	7.04549e-10	0.32897	0.161177
U2af1	705	1.2396e-10	1.55654e-09	0.324859	0.268723
Psma6	706	5.44054e-11	7.09987e-10	0.353619	0.188974
Glrp1	707	5.44428e-11	7.09987e-10	0.212129	0.122947
Ido1	708	2.07784e-08	2.01168e-07	0.0737458	0.114462
Mrpl22	709	5.60765e-11	7.29534e-10	0.219304	0.055057
Agpat5	709	2.08401e-08	2.01585e-07	0.151012	0.198877
Pkig	710	2.11617e-08	2.04513e-07	0.221248	0.234735
Mrps10	711	6.39774e-11	8.30325e-10	0.261222	0.130912
Kifc1	712	6.49039e-11	8.4134e-10	0.0705207	0.0625367
Serbp1	713	6.57738e-11	8.51598e-10	0.274423	0.202595
Hspb11	713	2.28603e-08	2.19557e-07	0.101489	0.257196
Samhd1	714	6.63885e-11	8.58529e-10	0.267728	0.122687
Slc25a39	715	7.33962e-11	9.4689e-10	0.2588	0.203509
Arpin	716	7.52259e-11	9.67037e-10	0.14016	0.072762
Cebpzos	717	7.91542e-11	1.01633e-09	0.231444	0.151672
Rabggtb	717	2.48663e-08	2.37767e-07	0.205711	0.265426
Bola1	718	8.99601e-11	1.15098e-09	0.196726	0.147678
Ppp1cc	719	9.52275e-11	1.21407e-09	0.30649	0.0934963
Cdk2ap2	719	2.49726e-08	2.38573e-07	0.239913	0.26175
Ptrh2	720	9.57294e-11	1.21903e-09	0.204057	0.0430768
Chchd3	720	2.52106e-08	2.40634e-07	0.221074	0.219037
Hnrnpa1	721	9.75875e-11	1.24123e-09	0.330449	0.169122
Rac1	721	2.57875e-08	2.45276e-07	0.126643	0.255787
AC160336.1	722	2.60201e-08	2.47271e-07	0.0739787	0.106872
Srsf4	723	1.01197e-10	1.28412e-09	0.242058	0.159976
Eno3	723	4.59881e-10	5.4106e-09	0.329226	0.2822
Gm27029	724	2.75047e-08	2.60009e-07	0.0411817	0.0532223
Psmd13	725	1.04543e-10	1.32348e-09	0.267515	0.142946
Rcan1	725	2.78319e-08	2.62644e-07	-0.150199	0.208806
Sesn2	726	2.85613e-08	2.69292e-07	0.0363461	0.0785431
Tubgcp2	727	1.08639e-10	1.37372e-09	0.193846	0.145647
Tagln2	727	2.92318e-08	2.74896e-07	0.188478	0.240551
Ndufa5	728	1.11323e-10	1.40603e-09	0.285521	0.0895767
Nsmce2	728	2.98402e-08	2.7993e-07	0.113568	0.206726
B9d1	729	1.18581e-10	1.4942e-09	0.214044	0.116545
Asnsd1	729	2.02983e-08	1.96696e-07	0.177143	0.169746
Srbd1	730	1.22524e-10	1.5421e-09	0.0743519	0.0418396
Dusp8	730	3.14377e-08	2.93346e-07	0.00322749	0.0785538
Ufc1	731	1.23634e-10	1.55426e-09	0.31185	0.239953
Ino80e	731	4.20836e-10	4.96742e-09	0.224378	0.196646
Gm10076	733	3.39206e-08	3.14886e-07	0.264559	0.275322
Psmg4	734	1.28002e-10	1.60359e-09	0.309636	0.252065
Lars	735	1.31288e-10	1.64191e-09	0.199538	0.153526
Pbdc1	735	1.81405e-08	1.76735e-07	0.247645	0.23254
Mrpl4	736	1.31365e-10	1.64191e-09	0.23025	0.127093
Ccl5	737	1.34114e-10	1.67434e-09	0.295998	0.200875
Psmb7	738	1.39495e-10	1.73828e-09	0.344107	0.246449
Ddias	738	3.7919e-08	3.502e-07	0.0453729	0.0459739
Ift172	739	1.39557e-10	1.73828e-09	0.323437	0.184666
Sptssa	739	3.95468e-08	3.64612e-07	0.21186	0.257431
Tmem237	740	3.97059e-08	3.65456e-07	0.149809	0.150871
Prelid1	741	1.4425e-10	1.79261e-09	0.348843	0.217555
Leprotl1	742	1.49408e-10	1.85458e-09	0.295738	0.112621
Pla2g16	743	1.50739e-10	1.86469e-09	0.360252	0.141793
Cyth2	743	4.07152e-08	3.74427e-07	-0.139775	0.267433
Psmb2	745	1.51808e-10	1.87363e-09	0.332314	0.217956
Srm	746	1.59698e-10	1.95984e-09	0.320833	0.116049
Tpst1	748	1.67668e-10	2.05531e-09	0.131451	0.114386
Vps36	749	1.6855e-10	2.06378e-09	0.235769	0.126714
Dot1l	749	4.67371e-08	4.27627e-07	0.0196775	0.205795
Idh3a	750	1.74747e-10	2.13725e-09	0.245492	0.118991
Mybl1	750	5.16089e-08	4.71007e-07	0.07664	0.0827626
Ppp1r11	751	1.32736e-08	1.31329e-07	0.283562	0.262266
Magohb	752	1.86707e-10	2.27773e-09	0.238129	0.177724
Arf6	752	5.40196e-08	4.92593e-07	0.116456	0.268912
Atp5b	753	1.86865e-10	2.27773e-09	0.349513	0.2369
Phf19	753	5.65595e-08	5.14022e-07	0.0378574	0.051057
Mettl5	754	1.90282e-10	2.31677e-09	0.121142	0.0456013
Cdca4	754	5.68786e-08	5.16055e-07	0.0570555	0.202431
Exosc7	755	1.96555e-10	2.39046e-09	0.211875	0.0678881
Osgin1	755	5.80279e-08	5.26042e-07	-0.00568676	0.0958896
Glrx5	756	2.00663e-10	2.43768e-09	0.331917	0.244839
Mlf1	756	4.29318e-10	5.06202e-09	0.227106	0.196322
Babam1	757	2.01982e-10	2.45096e-09	0.268139	0.206441
Bcl7c	757	2.18889e-08	2.10601e-07	0.271736	0.255205
Tsen15	758	2.06153e-10	2.49877e-09	0.162448	0.100537
Serpina3f	758	9.7153e-09	9.80041e-08	0.0968987	0.09263
Cdc123	759	2.0884e-10	2.52851e-09	0.266869	0.121398
Tamm41	760	2.24068e-10	2.70984e-09	0.117655	0.072971
Mitd1	761	2.35461e-10	2.84128e-09	0.222685	0.0845817
Sms	761	6.58169e-08	5.94163e-07	0.239573	0.243068
Plgrkt	763	6.84836e-08	6.17207e-07	0.182686	0.207887
Mettl9	764	2.65177e-10	3.18213e-09	0.265567	0.165548
Chchd7	764	7.17162e-08	6.42954e-07	0.22871	0.242858
Itga5	765	7.83914e-08	6.99513e-07	0.00396774	0.14092
Pwwp2b	766	3.2222e-10	3.85382e-09	0.135141	0.0594527
Taldo1	766	7.76451e-10	8.89344e-09	0.279976	0.23705
Gcsh	767	8.06126e-08	7.1874e-07	0.216764	0.228328
Mrpl51	768	3.3839e-10	4.04275e-09	0.298254	0.209388
Tex9	768	4.97343e-08	4.54282e-07	0.109228	0.105443
Nedd8	769	3.39366e-10	4.04548e-09	0.312099	0.163144
Ipo7	769	8.15059e-08	7.23725e-07	-0.00764759	0.218728
Mrpl10	770	3.52293e-10	4.19497e-09	0.179995	0.148908
Ube2a	771	8.48527e-08	7.52208e-07	0.197674	0.242319
Ncbp2	772	3.89559e-10	4.61333e-09	0.224247	0.112077
Stil	772	5.77138e-09	6.01245e-08	0.0594059	0.0560829
Uqcr11	773	3.90541e-10	4.6199e-09	0.33189	0.199007
Irgm1	773	7.01951e-09	7.18819e-08	0.228438	0.205582
Ppa2	774	3.98868e-10	4.71326e-09	0.24541	0.108996
Pvr	774	8.90416e-08	7.86888e-07	0.0322976	0.186004
4930579C12Rik	776	9.09073e-08	8.00635e-07	0.0911484	0.156439
mt-Cytb	777	9.67354e-08	8.4989e-07	-0.0378568	0.209958
Gm47283	778	9.69149e-08	8.50776e-07	0.183042	0.231543
Gadd45gip1	779	4.67325e-10	5.49221e-09	0.26697	0.0270963
Aup1	780	4.74962e-10	5.56986e-09	0.241171	0.120507
Pold3	781	4.80781e-10	5.632e-09	0.168413	0.131649
Ypel5	781	1.015e-07	8.88142e-07	-0.0231722	0.178696
Polr2k	783	5.13853e-10	5.99579e-09	0.29353	0.179781
Syngr2	784	5.14051e-10	5.99579e-09	0.270208	0.12516
Pnkd	784	1.04496e-07	9.12882e-07	0.199735	0.205234
Iscu	785	5.16286e-10	6.01537e-09	0.227056	0.132661
Ppif	785	1.05512e-07	9.19539e-07	-0.00173005	0.203417
Bub3	786	5.35827e-10	6.23634e-09	0.279631	0.124291
Lmo4	786	1.05871e-07	9.21922e-07	0.0936443	0.170478
Rad9a	787	5.41063e-10	6.29051e-09	0.143515	0.0967756
Tsc22d2	787	1.09909e-07	9.52489e-07	-0.0820486	0.206879
Ifi47	788	5.4233e-10	6.29848e-09	0.29132	-0.0142023
Idh2	789	5.652e-10	6.55705e-09	0.272809	0.15968
Rbm38	789	1.23014e-07	1.0635e-06	0.0393844	0.0993327
Got2	790	5.84113e-10	6.76921e-09	0.276735	0.143307
Rel	790	1.23165e-07	1.06396e-06	-0.0727513	0.142324
Cep57l1	791	5.96652e-10	6.90713e-09	0.101821	0.0554985
Nipal1	792	1.29424e-07	1.11446e-06	-0.0311559	0.132691
Sec61b	794	6.66358e-10	7.68121e-09	0.324731	0.244769
Gbp2	794	1.32185e-07	1.13733e-06	0.250023	0.323306
Snrpd3	796	6.84488e-10	7.87343e-09	0.323995	0.154177
Ift43	797	7.03379e-10	8.08214e-09	0.29253	0.202393
Haus5	797	1.35674e-07	1.1655e-06	0.0524396	0.052781
Plac1	798	6.98051e-08	6.2755e-07	0.0969599	0.0930525
Nup107	799	1.4021e-07	1.20352e-06	0.063438	0.0772483
Cdc25a	800	7.89921e-10	9.02862e-09	0.154283	0.111401
Rassf1	800	1.41685e-07	1.21425e-06	0.201396	0.218474
Exosc2	801	8.31964e-10	9.48912e-09	0.143705	0.121454
Socs3	802	8.52592e-10	9.71417e-09	0.330208	-0.0417192
Fam204a	802	1.43582e-07	1.22953e-06	0.109928	0.236442
Rabepk	803	8.73909e-10	9.94657e-09	0.180786	0.0805201
Ttk	803	5.0268e-09	5.25701e-08	0.0521864	0.0482068
Ercc6l	804	1.44738e-07	1.23845e-06	0.0443667	0.0469123
Spns3	805	1.47007e-07	1.25588e-06	0.0839456	0.0926884
Edf1	806	9.11454e-10	1.03305e-08	0.292043	0.151513
Batf2	808	9.56526e-10	1.08073e-08	0.113403	0.0894407
Twf2	808	3.95028e-09	4.19606e-08	0.158778	0.140502
Faap20	809	9.60624e-10	1.08423e-08	0.183647	0.0949365
Dpm3	810	1.05377e-09	1.18813e-08	0.19785	0.137136
Pcnt	810	1.69073e-08	1.65316e-07	0.14125	0.131114
Rtca	811	1.12912e-09	1.26938e-08	0.204278	0.144556
Uqcrc1	812	1.12935e-09	1.26938e-08	0.329324	0.16785
H2-DMb2	812	8.12546e-08	7.22085e-07	0.207862	0.210232
Mrpl23	813	1.14444e-09	1.28367e-08	0.312001	0.13472
Midn	813	1.62975e-07	1.38791e-06	0.122683	0.174441
Aida	814	1.14709e-09	1.28531e-08	0.271961	0.181291
Erf	814	1.65709e-07	1.41009e-06	0.110812	0.154844
Cops5	815	1.19128e-09	1.33206e-08	0.274524	0.168743
Thyn1	816	1.22687e-09	1.37045e-08	0.236305	0.0870217
Mafg	816	1.72966e-07	1.46838e-06	-0.0345259	0.269794
Dctn2	817	1.23782e-09	1.38125e-08	0.265876	0.186677
Dnajb4	817	1.73606e-07	1.47216e-06	-0.286175	0.196497
Arhgef39	819	1.79317e-07	1.51635e-06	0.0174404	0.0427617
Ptms	820	1.30424e-09	1.45388e-08	0.323362	0.212959
Pigf	820	9.05146e-08	7.98452e-07	0.165371	0.162842
Trmt6	821	1.40293e-09	1.56067e-08	0.165225	0.0444071
Pbx3	821	1.81098e-07	1.52975e-06	0.0744275	0.0804214
Atp5g3	822	1.41525e-09	1.57276e-08	0.304994	0.174592
Gtpbp2	822	1.87512e-07	1.57948e-06	0.149213	0.175565
Dnlz	823	1.47426e-09	1.63497e-08	0.214159	0.129567
Ccsap	823	2.39602e-08	2.29509e-07	0.088335	0.0830253
Lasp1	824	1.53605e-09	1.70002e-08	0.2096	0.0343417
Hebp2	825	1.58804e-09	1.75576e-08	0.158517	0.114444
Fam173b	825	2.03394e-07	1.70794e-06	0.110747	0.120906
Prkar2b	826	1.61432e-09	1.78119e-08	0.131821	0.0975644
Arhgef3	826	2.06777e-07	1.73366e-06	0.0104153	0.122165
Ndufs2	827	1.65287e-09	1.82186e-08	0.295031	0.164462
Timeless	827	1.66869e-09	1.83556e-08	0.0864122	0.0765353
Reep4	828	2.12285e-07	1.77435e-06	0.127842	0.162229
2310039H08Rik	829	1.67538e-09	1.84104e-08	0.21662	0.0343571
Clpb	829	4.57499e-09	4.82648e-08	0.139015	0.12333
Trim59	830	1.77177e-09	1.94106e-08	0.18357	0.151224
Ube2n	831	1.86189e-09	2.03567e-08	0.303329	0.155844
Ccdc181	831	2.23106e-07	1.86191e-06	0.0832103	0.0909369
Orc2	832	1.94456e-09	2.12391e-08	0.17589	0.0639688
Gatad1	834	2.0826e-09	2.27239e-08	0.269196	0.109284
Lamtor1	836	2.15656e-09	2.35072e-08	0.240724	0.144176
Wdhd1	836	1.22179e-07	1.05713e-06	0.0588994	0.0568466
Msh6	837	2.1602e-09	2.35231e-08	0.125922	0.0830201
Atpaf2	839	2.25485e-09	2.45292e-08	0.141339	0.1032
Tmem171	839	2.50233e-07	2.08188e-06	0.0640062	0.116798
Tmem218	840	2.31766e-09	2.51619e-08	0.171405	0.137157
Bcl7b	840	2.52522e-07	2.09719e-06	0.152507	0.16747
Lrrc40	841	2.99671e-08	2.80592e-07	0.104847	0.0983677
Isca2	842	3.10609e-08	2.90081e-07	0.153074	0.139167
Mrps35	845	2.61566e-09	2.83271e-08	0.184354	0.0532698
Ythdc1	845	2.80428e-07	2.31706e-06	-0.109397	0.255176
H2afy	846	2.64886e-09	2.8614e-08	0.305049	0.146013
Aqp1	846	2.84341e-07	2.3476e-06	0.0703063	0.0799886
Tuba1a	847	2.65404e-09	2.86414e-08	0.382456	0.269226
Slc7a1	847	2.88458e-07	2.37616e-06	0.0251385	0.177302
Abhd17a	848	2.87076e-09	3.09186e-08	0.230085	0.117431
Psmc1	848	2.90333e-07	2.38978e-06	0.216013	0.24413
Ddx39	849	2.98338e-09	3.20676e-08	0.293944	0.133705
Mrpl38	850	1.01365e-07	8.87686e-07	0.257949	0.24105
Tcof1	851	3.25106e-09	3.48755e-08	0.185169	0.133249
Actn4	852	3.34622e-09	3.58254e-08	0.267444	0.178195
Ncoa7	852	6.30999e-08	5.70112e-07	0.135867	0.127853
Mrps26	854	3.50405e-09	3.74411e-08	0.271966	-0.0129005
Eif5	854	3.04351e-07	2.50326e-06	0.068971	0.252107
Tcim	855	3.0643e-07	2.51845e-06	-0.233249	0.321159
Nt5c3b	856	3.72413e-09	3.97142e-08	0.212727	0.146428
Eif1	856	3.11873e-07	2.56124e-06	-0.129617	0.165492
Tbcb	857	3.84987e-09	4.09744e-08	0.251905	0.162643
Tubb4b	857	3.14269e-07	2.57896e-06	0.264998	0.310552
Ndufb3	859	3.94506e-09	4.19463e-08	0.266725	0.156229
Tsc22d1	860	3.34075e-07	2.72908e-06	-0.0999856	0.308922
Dnajc10	861	4.35449e-09	4.60734e-08	0.204141	0.153159
Mpv17l2	862	4.36944e-09	4.61863e-08	0.15659	0.0943997
BC004004	862	2.87752e-07	2.37215e-06	0.19382	0.188742
Slc7a5	863	4.43483e-09	4.68318e-08	0.171857	0.146256
Sdf2l1	863	2.09439e-07	1.75191e-06	0.153191	0.148798
Soat1	864	3.46242e-07	2.82421e-06	0.0584033	0.129014
Dusp16	865	3.49895e-07	2.84971e-06	0.0222941	0.100722
Amz2	866	4.73648e-09	4.98041e-08	0.182032	0.0830793
Cpsf2	866	5.05865e-09	5.28521e-08	0.22294	0.193066
Lpcat1	867	4.73931e-09	4.98041e-08	0.172536	0.0408583
Ndufs8	868	4.90109e-09	5.13547e-08	0.281163	0.185037
Mrpl37	869	4.91656e-09	5.1467e-08	0.163207	0.0951587
4933404O12Rik	869	3.59188e-07	2.921e-06	0.059	0.063901
Smyd4	870	3.61273e-07	2.93575e-06	0.0289549	0.0835644
Ccnd2	871	3.6215e-07	2.94067e-06	0.0911993	0.113111
Ift20	873	5.59529e-09	5.83463e-08	0.239101	0.111924
Haspin	874	1.08509e-07	9.42615e-07	0.0514026	0.0493191
Nt5dc2	875	5.9935e-09	6.23785e-08	0.163856	0.141249
Fkbp8	876	6.06424e-09	6.30541e-08	0.294328	0.174189
Erlin1	876	2.86559e-07	2.36411e-06	0.146069	0.141777
Mesd	877	6.10099e-09	6.33754e-08	0.229906	0.00483095
Cd82	877	3.7864e-07	3.06838e-06	0.0504809	0.294127
Dtd2	878	6.17748e-09	6.41083e-08	0.15777	0.107993
Tgtp2	878	4.02782e-07	3.25352e-06	0.0758111	0.079714
Wdr18	879	6.23223e-09	6.46146e-08	0.236151	0.0825291
Cnih4	880	6.47156e-09	6.69677e-08	0.301474	0.235707
Rad21	880	4.2837e-07	3.44734e-06	0.181321	0.198729
St6galnac4	881	6.74032e-09	6.95493e-08	0.130273	0.0502308
Cnih1	882	6.8017e-09	7.00491e-08	0.271428	0.145255
Slc38a2	882	4.47117e-07	3.58754e-06	-0.166578	0.247896
Epsti1	883	6.8769e-09	7.07562e-08	0.156218	0.119841
Ppp1r7	884	6.90936e-09	7.10227e-08	0.168502	0.0778326
Tmem17	885	6.93563e-09	7.11576e-08	0.115107	0.0783568
Ruvbl2	887	7.10295e-09	7.26676e-08	0.21775	0.149388
Klf9	888	5.43068e-07	4.319e-06	-0.19363	0.186225
Timm10b	889	7.68836e-09	7.84343e-08	0.20775	0.0919602
Hipk1	889	5.50851e-07	4.37769e-06	-0.0197487	0.187269
Ciart	890	5.51523e-07	4.37981e-06	0.0503503	0.0593081
A430005L14Rik	893	8.2372e-09	8.38753e-08	0.202314	0.0341391
Rpl34	893	5.62042e-07	4.45029e-06	0.065084	0.177609
Ado	894	8.26588e-09	8.40883e-08	0.18948	0.0121148
Troap	894	5.66002e-07	4.47837e-06	0.0306012	0.0361724
Lbr	895	8.44945e-09	8.5875e-08	0.171264	0.151455
Mdh2	896	8.47415e-09	8.60453e-08	0.305395	0.205894
Slc30a1	896	5.75523e-07	4.55037e-06	0.127839	0.169397
Abcg2	897	8.56329e-09	8.68688e-08	0.135781	-0.0104254
Rgl2	897	6.07678e-07	4.7941e-06	0.0561703	0.114597
Mtmr2	899	8.6657e-09	8.77433e-08	0.233276	0.116686
Nabp1	899	6.53594e-07	5.13762e-06	0.0374897	0.173343
Ap2s1	900	8.75542e-09	8.85688e-08	0.282413	0.115976
Glul	901	6.6769e-07	5.24462e-06	0.0675692	0.137214
Itgb3bp	904	9.44666e-09	9.53831e-08	0.13459	0.115165
Higd1a	905	7.33502e-07	5.7283e-06	0.0198473	0.240969
Gemin2	906	9.82083e-09	9.88843e-08	0.0940601	0.0445
Sh3gl3	906	7.35576e-07	5.74036e-06	0.0350703	0.0736789
Slf2	907	9.86626e-09	9.91573e-08	0.21767	0.0776926
Actr3	907	7.44428e-07	5.80525e-06	0.192478	0.238208
Srsf3	908	9.96366e-09	1.00043e-07	0.302143	0.170362
Rpl27	909	1.00822e-08	1.0114e-07	0.251128	0.181177
S100a4	909	7.81315e-07	6.0754e-06	-0.269368	0.444591
Cetn3	910	1.04099e-08	1.0433e-07	0.250665	0.05701
Cep192	911	1.41189e-07	1.21096e-06	0.11715	0.110315
Eftud2	912	1.05198e-08	1.05334e-07	0.184667	0.0990438
Prim2	912	8.00405e-07	6.21937e-06	0.0402339	0.051285
Pih1d2	913	8.09295e-07	6.28394e-06	0.0644613	0.0735188
Mtch2	914	1.16502e-08	1.16438e-07	0.286765	0.138986
Nptxr	914	8.17899e-07	6.34619e-06	0.00691211	0.0750489
4930579G24Rik	915	1.21182e-08	1.20891e-07	0.0639758	0.0517622
Nupr1	915	8.23564e-07	6.38557e-06	-0.116655	0.345344
Zranb2	917	1.24704e-08	1.24176e-07	0.259183	0.093265
Inpp4b	917	8.25674e-07	6.39735e-06	0.0303914	0.079
Ccdc25	918	1.2623e-08	1.2558e-07	0.170265	0.0796144
Prkg2	918	8.30829e-07	6.42809e-06	0.231194	0.280778
Prps1	919	1.29426e-08	1.28524e-07	0.226348	0.0634913
Smad7	919	8.50381e-07	6.56997e-06	-0.0175079	0.200929
Psmg2	920	1.2992e-08	1.28896e-07	0.163938	0.13144
Glipr2	921	1.30085e-08	1.28941e-07	0.20651	0.150828
Atp6v1d	921	8.67607e-07	6.69828e-06	0.0924512	0.208301
Tinf2	922	9.23905e-07	7.10757e-06	0.0406425	0.0546795
Mrps18b	924	1.3982e-08	1.38212e-07	0.246003	0.0590932
Tmx1	924	9.40112e-07	7.21686e-06	0.157322	0.176287
Stub1	925	1.41824e-08	1.40064e-07	0.275817	0.0999592
Nudt1	925	2.55015e-08	2.42982e-07	0.118329	0.101981
Fh1	926	1.46458e-08	1.44509e-07	0.206149	0.129089
Oxct1	927	1.47681e-08	1.45583e-07	0.129974	0.101452
Rpl36al	927	9.98433e-07	7.63209e-06	0.245244	0.233247
Hnrnpr	928	1.53336e-08	1.5102e-07	0.259053	0.0503728
Ctc1	928	1.00187e-06	7.65296e-06	0.0733974	0.0766502
Rbm43	929	1.53794e-08	1.51333e-07	0.14349	0.0450402
Mif	929	1.00765e-06	7.68625e-06	0.0523894	0.258784
Frmd4a	930	1.5999e-08	1.57287e-07	0.20505	0.146744
Ankrd26	931	1.68873e-08	1.6527e-07	0.123375	0.0600631
Ucp2	931	5.52748e-07	4.38311e-06	0.189413	0.186718
Kif18a	933	1.14803e-06	8.68643e-06	0.0315473	0.0341517
Donson	934	1.20088e-06	9.07073e-06	0.0682608	0.0744041
Oasl1	935	1.74116e-08	1.70093e-07	0.154953	0.12437
Vrk2	935	8.90278e-07	6.86351e-06	0.101155	0.100904
Sgf29	936	1.75317e-08	1.71112e-07	0.110543	0.0422807
Chrac1	937	1.78612e-08	1.74171e-07	0.267453	0.0867826
Tnfrsf12a	938	1.31042e-06	9.87058e-06	-0.236546	0.219763
Smim20	939	1.84925e-08	1.80002e-07	0.165199	0.0931881
Ddt	939	1.32816e-06	9.99722e-06	0.175287	0.194604
Il12rb1	940	1.86151e-08	1.81033e-07	0.109814	0.0806571
Cep128	942	1.88913e-08	1.83554e-07	0.048579	0.0439969
Bag3	943	1.44865e-06	1.08513e-05	-0.173845	0.191355
Cdca7	945	1.92692e-08	1.87058e-07	0.138324	0.0644012
Washc3	946	1.93988e-08	1.88148e-07	0.204893	0.122713
Cisd3	947	1.5036e-06	1.12319e-05	0.102828	0.136668
Hist1h1d	949	2.14604e-08	2.07215e-07	0.0560864	0.0479805
Acbd6	950	2.16517e-08	2.08875e-07	0.249131	0.129834
Nme2	951	2.18594e-08	2.10559e-07	0.203427	0.168952
Bbip1	951	1.61257e-06	1.1988e-05	0.15701	0.171354
1110038F14Rik	952	2.18651e-08	2.10559e-07	0.171922	0.0452239
Mapre1	952	1.62014e-06	1.20277e-05	0.0521887	0.224801
Sf3b2	954	2.2733e-08	2.18528e-07	0.297605	0.0814246
Fuom	954	1.07993e-06	8.19718e-06	0.12895	0.125336
Rbx1	955	2.33023e-08	2.23603e-07	0.272181	0.15065
Itga2	955	1.67362e-06	1.23738e-05	-0.142151	0.186853
Atp5d	956	2.35613e-08	2.25888e-07	0.26442	0.129689
Tpm1	956	1.67947e-06	1.24086e-05	0.116237	0.253575
1810013L24Rik	957	1.68547e-06	1.24444e-05	-0.0351674	0.143217
Lyrm9	958	2.41822e-08	2.31431e-07	0.0969257	0.0642451
Dck	959	1.69721e-06	1.25225e-05	0.0609794	0.0767287
Snapc5	960	2.54241e-08	2.42459e-07	0.190576	0.131621
Cep170	961	8.54669e-08	7.57033e-07	0.202087	0.181439
Dda1	962	2.55884e-08	2.43596e-07	0.235944	0.194327
Otud1	962	1.80405e-06	1.32927e-05	0.0362476	0.0708276
H2-T22	963	2.61272e-08	2.48071e-07	0.295404	0.162496
Cfl1	963	1.84851e-06	1.36111e-05	0.168377	0.202408
Fam118b	964	2.66449e-08	2.52764e-07	0.12621	0.0400362
Ift74	964	8.07556e-08	7.18831e-07	0.162096	0.144159
Ss18l2	965	2.67553e-08	2.5359e-07	0.153335	0.125223
Chpt1	966	2.72776e-08	2.58232e-07	0.180075	0.15019
Mrps6	966	1.95914e-06	1.4367e-05	-0.0373131	0.222411
Wdcp	967	2.72928e-08	2.58232e-07	0.104752	0.0879804
Cacybp	967	2.04188e-06	1.49535e-05	0.184236	0.239097
Pfdn4	968	2.76198e-08	2.6087e-07	0.254043	0.157073
Snx7	968	2.05828e-06	1.50533e-05	0.0577377	0.092633
Trappc1	969	2.85984e-08	2.69408e-07	0.206663	0.155907
Fnip1	969	2.06577e-06	1.50979e-05	-0.143732	0.164873
Nadk	970	2.88422e-08	2.71467e-07	0.215102	0.159307
Tbc1d7	970	2.07549e-06	1.51484e-05	0.0338434	0.0777495
Rtp4	971	2.94016e-08	2.76253e-07	0.280386	0.0822265
Eny2	971	2.07786e-06	1.51555e-05	0.211313	0.233735
3110009E18Rik	972	2.98549e-08	2.7993e-07	0.0742783	0.0539622
Rpf2	973	2.98706e-08	2.7993e-07	0.209398	-0.00246396
Mdm2	974	2.20733e-06	1.6035e-05	-0.0474367	0.1866
Ipo9	975	3.0606e-08	2.86182e-07	0.101394	0.0600252
Stk17b	975	2.39612e-06	1.73366e-05	0.0176883	0.108691
Commd2	976	3.06171e-08	2.86182e-07	0.218849	-0.0365926
Apln	977	2.46517e-06	1.77887e-05	0.0359896	0.060426
Rnpep	978	3.15376e-08	2.94025e-07	0.191383	0.0854723
Spg7	979	3.22474e-08	3.00384e-07	0.187596	0.146706
Frmd4b	979	2.528e-06	1.81935e-05	-0.0305834	0.139799
Psmb5	980	3.31073e-08	3.08129e-07	0.289093	0.0942941
Pabpc1	980	2.54482e-06	1.82902e-05	0.13994	0.175527
Mrps12	981	3.33655e-08	3.10265e-07	0.186779	0.153356
Dph3	982	3.38492e-08	3.14493e-07	0.266074	0.167896
Snhg6	982	2.57275e-06	1.84665e-05	0.114529	0.209809
Cystm1	983	2.59986e-06	1.86364e-05	-0.155002	0.241548
Mad2l2	984	3.54245e-08	3.28565e-07	0.150846	0.0653743
Mettl23	984	2.61982e-06	1.8767e-05	0.127784	0.135231
Crcp	985	3.5528e-08	3.29243e-07	0.153236	0.117073
Kars	986	3.68518e-08	3.41218e-07	0.252456	0.155358
Nup85	986	2.35568e-07	1.96288e-06	0.12696	0.115345
Ssx2ip	987	3.75144e-08	3.47056e-07	0.131295	0.0836798
Nt5c	988	3.75468e-08	3.47059e-07	0.233834	0.0103646
Phlda2	988	2.72411e-06	1.94369e-05	0.0783385	0.184335
Vma21	989	3.92198e-08	3.61906e-07	0.220198	0.159909
Gnai2	990	3.95974e-08	3.64768e-07	0.290017	0.143845
Klf3	991	2.86973e-06	2.03952e-05	-0.13544	0.220173
Idh3g	992	4.29115e-08	3.9429e-07	0.240157	0.14886
Ube2i	992	2.90354e-06	2.06085e-05	0.204439	0.220333
Nexn	993	4.29639e-08	3.94437e-07	0.0639494	0.0404843
Hap1	993	2.93477e-06	2.07756e-05	0.0776172	0.0841764
Mars	994	4.44809e-08	4.08018e-07	0.143268	0.111285
Akt1s1	995	4.45429e-08	4.08241e-07	0.204816	0.072429
Cox7a2	995	7.34108e-08	6.57236e-07	0.280032	0.227901
Taf12	996	4.55303e-08	4.16938e-07	0.178863	0.13038
Trim37	997	4.89578e-08	4.47567e-07	0.141863	0.0974238
Cst6	997	3.18929e-06	2.24746e-05	0.024839	0.0552419
Grk6	998	3.28576e-06	2.30942e-05	0.104709	0.107991
Clns1a	1000	5.44041e-08	4.95682e-07	0.212081	0.0432726
Emd	1001	5.54699e-08	5.04576e-07	0.207289	0.125608
Ppp5c	1002	5.54735e-08	5.04576e-07	0.152401	0.111983
Tomm20	1002	7.64994e-08	6.83193e-07	0.208908	0.170851
Hist1h2an	1003	5.66773e-08	5.1466e-07	0.0489702	0.0443094
Rad54b	1003	2.4893e-06	1.79508e-05	0.0443531	0.0446978
Cpsf4	1005	5.95325e-08	5.3923e-07	0.131813	0.067653
mt-Co2	1005	3.6485e-06	2.53964e-05	-0.107058	0.190264
Eif1ax	1006	5.9777e-08	5.40992e-07	0.27458	0.12841
Serpine1	1006	3.67881e-06	2.55744e-05	-0.0605802	0.189844
Haus3	1007	5.9987e-08	5.42439e-07	0.129509	0.0961809
As3mt	1009	3.72875e-06	2.58718e-05	0.0363176	0.0507147
Med8	1011	6.59674e-08	5.95026e-07	0.200397	-0.00971189
Recql	1011	3.78791e-06	2.62483e-05	0.0441285	0.0529457
Aurkaip1	1012	6.93362e-08	6.24372e-07	0.259521	0.151868
Phf11b	1013	6.96813e-08	6.26958e-07	0.107209	0.068554
Irx1	1013	3.79029e-06	2.62483e-05	0.0745776	0.117973
Rps12-ps3	1014	7.00539e-08	6.29265e-07	0.268458	0.202536
Snx5	1014	1.90268e-06	1.39814e-05	0.216443	0.20284
Sssca1	1015	7.0285e-08	6.30817e-07	0.267397	-0.0196285
Ttf2	1016	7.17561e-08	6.42954e-07	0.0520402	0.0375901
Mast4	1016	3.9607e-06	2.73584e-05	-0.457662	0.238772
2010107E04Rik	1017	1.67034e-07	1.42025e-06	0.279326	0.236879
Cfap43	1018	4.12573e-06	2.8462e-05	0.0495462	0.1037
Mpp6	1019	7.46417e-08	6.67704e-07	0.26211	0.118806
Gtse1	1019	4.37989e-06	3.0043e-05	0.0272705	0.0300574
Arpp19	1020	7.62276e-08	6.81327e-07	0.269736	0.153539
Cox17	1021	1.47149e-06	1.10072e-05	0.20482	0.187988
Arf1	1022	1.73683e-07	1.47216e-06	0.257541	0.202105
Jpt2	1024	8.07176e-08	7.18831e-07	0.185811	0.123468
Rmi2	1024	3.51947e-06	2.4609e-05	0.0558822	0.0556675
Dusp7	1025	2.1747e-06	1.58192e-05	0.178852	0.167413
Manbal	1026	8.08439e-08	7.19026e-07	0.207085	0.0283651
Ppm1g	1026	4.70363e-06	3.20699e-05	0.179467	0.203383
Polr1d	1027	4.73287e-06	3.22395e-05	0.110278	0.209144
Adam19	1028	4.74801e-06	3.23223e-05	0.030233	0.0445855
Cyr61	1029	4.87275e-06	3.31298e-05	-0.519024	0.328722
Gnb4	1030	8.45868e-08	7.50466e-07	0.183473	0.117436
Mrps25	1030	4.90534e-06	3.33304e-05	0.17944	0.181752
Cep89	1032	8.82983e-08	7.81472e-07	0.10065	0.0749837
Rad54l	1032	4.91575e-06	3.33802e-05	0.0344378	0.0370579
Nde1	1033	8.90557e-08	7.86888e-07	0.118759	0.0543183
Lin9	1034	9.03342e-08	7.97535e-07	0.101854	0.0581425
Srsf11	1034	5.01528e-06	3.39496e-05	-0.0725213	0.223611
Cirbp	1035	9.05856e-08	7.98452e-07	0.234089	0.196666
Rab13	1035	5.09176e-06	3.44457e-05	0.0906698	0.126977
Rad23a	1036	9.17453e-08	8.07359e-07	0.153291	0.0960812
Mcl1	1036	5.14562e-06	3.47884e-05	-0.015496	0.198744
Ccnd3	1037	9.26043e-08	8.14256e-07	0.161345	0.0870561
Ttc32	1037	5.19918e-06	3.51066e-05	0.096392	0.0998772
Mrpl41	1039	9.81016e-08	8.60495e-07	0.184475	-0.00265282
Nab2	1039	5.33685e-06	3.59913e-05	0.111159	0.12509
Mrnip	1040	5.34873e-06	3.6049e-05	0.0352151	0.0436496
Cntrl	1041	1.0011e-07	8.77404e-07	0.133196	0.0792101
Cdk5r1	1043	5.44206e-06	3.66096e-05	0.0292353	0.0872396
Sys1	1044	1.02672e-07	8.97674e-07	0.269209	0.115078
Maz	1045	1.05057e-07	9.16467e-07	0.138031	0.0495471
Prpf31	1046	1.05075e-07	9.16467e-07	0.159067	0.0148232
Tomm40	1047	1.06321e-07	9.25094e-07	0.247298	0.171981
Znhit3	1047	5.79655e-06	3.88976e-05	0.10945	0.14
Tmco1	1048	1.06673e-07	9.27417e-07	0.196872	0.149507
Naa50	1048	6.05394e-06	4.05494e-05	0.142438	0.218428
Efhd2	1049	6.16391e-06	4.1235e-05	0.199823	0.222399
Kcnk5	1050	6.20679e-06	4.14706e-05	0.0224397	0.0943182
Cnot9	1051	1.08767e-07	9.44104e-07	0.121922	0.0730014
St3gal4	1051	2.51508e-06	1.81126e-05	0.2058	0.196255
Mpdu1	1052	1.0949e-07	9.49619e-07	0.193817	0.13864
Wac	1053	6.37838e-06	4.25121e-05	0.0168852	0.196641
Smim8	1054	1.17586e-07	1.0182e-06	0.112457	0.0657049
Rpl35a	1054	6.48907e-06	4.31966e-05	0.019	0.16287
Cox7c	1055	1.24902e-07	1.07795e-06	0.265301	0.195031
Atic	1056	1.24984e-07	1.07795e-06	0.217211	-0.0254853
Mgme1	1056	6.7909e-06	4.50673e-05	0.0353232	0.0640278
Mvb12a	1057	1.29057e-07	1.11219e-06	0.235676	0.0607104
Rad51c	1057	6.882e-06	4.56439e-05	0.0289837	0.0370996
Hyal1	1058	7.19883e-06	4.75993e-05	0.00535587	0.0640962
Ogg1	1059	9.79417e-07	7.49732e-06	0.0758622	0.0685916
Igfbp4	1060	1.34456e-07	1.15596e-06	0.335088	0.168838
Stx3	1060	7.53429e-06	4.9696e-05	-0.0954804	0.215417
Ybx3	1061	2.77736e-06	1.97647e-05	0.224185	0.212706
Csgalnact1	1062	7.71386e-06	5.08185e-05	0.0185043	0.0600252
Zbtb8os	1064	1.46147e-07	1.24952e-06	0.113822	0.0215617
0610012G03Rik	1065	1.50077e-07	1.2811e-06	0.242375	0.136066
Ppp2r5c	1065	2.89023e-06	2.05275e-05	0.171421	0.15995
Atp5c1	1066	1.52452e-07	1.30035e-06	0.281257	0.0430294
Ankrd1	1066	8.34952e-06	5.46734e-05	0.124781	0.200728
1110004F10Rik	1067	1.52746e-07	1.30183e-06	0.252386	0.152883
Mafk	1067	8.49534e-06	5.55275e-05	-0.161939	0.120128
Ctdnep1	1068	4.54618e-07	3.64233e-06	0.204031	0.177754
1110059E24Rik	1069	1.23265e-06	9.29773e-06	0.156104	0.140849
Slfn2	1070	9.16134e-06	5.9557e-05	0.10545	0.168155
Tssc4	1071	1.67645e-07	1.42432e-06	0.123081	0.0711441
Luzp1	1072	9.27457e-06	6.02207e-05	0.0572171	0.198893
Glrx2	1073	1.73924e-07	1.47305e-06	0.210069	0.126053
Cers2	1073	4.355e-07	3.49952e-06	0.25175	0.214984
Pcnp	1074	1.7553e-07	1.48548e-06	0.228152	0.162123
Mrps16	1076	1.81184e-07	1.52975e-06	0.213901	0.121774
Gjb4	1076	9.72025e-06	6.28132e-05	-0.425838	0.225673
Sars2	1077	1.8335e-07	1.54683e-06	0.0493027	0.0327129
Myh10	1078	1.86581e-07	1.57286e-06	0.161491	0.0439001
Avpi1	1078	3.2543e-06	2.28908e-05	0.216358	0.196694
Sap30	1079	1.94356e-07	1.63586e-06	0.154679	0.0354669
Oxnad1	1079	1.06935e-05	6.87737e-05	0.0798806	0.0827264
Rpl18	1080	1.9454e-07	1.63613e-06	0.178461	0.109962
Ddx52	1081	1.99509e-07	1.67662e-06	0.155541	0.0884572
Dnaja4	1081	1.07452e-05	6.90652e-05	0.0235892	0.096667
Ddx1	1083	2.04316e-07	1.71436e-06	0.192768	0.110921
Actr1b	1084	2.0871e-07	1.74851e-06	0.176978	0.0890418
Gm6634	1084	1.13337e-05	7.24604e-05	0.0117988	0.0731249
Impdh2	1085	2.09313e-07	1.75191e-06	0.298437	0.139747
Atp5a1	1085	5.79277e-07	4.57671e-06	0.263366	0.230087
Sdhaf4	1087	2.13218e-07	1.78076e-06	0.175606	0.0578798
Nup62	1087	1.18586e-05	7.55485e-05	0.145482	0.153763
Terf1	1088	6.73351e-07	5.28524e-06	0.12725	0.112704
Cep295	1089	2.25105e-07	1.87715e-06	0.120464	0.050143
Tnnt2	1089	1.24138e-05	7.84394e-05	0.0239045	0.261555
Eif4h	1090	4.52259e-06	3.08849e-05	0.220639	0.204567
Ankle1	1091	2.59049e-07	2.14697e-06	0.0409296	0.0368294
Crlf3	1093	2.44458e-07	2.03539e-06	0.14631	0.0569874
Rasd1	1093	1.29749e-05	8.17461e-05	0.027574	0.0466415
Mtfr1	1094	2.51903e-07	2.09416e-06	0.201495	0.0499944
Slc25a37	1094	1.32622e-05	8.34109e-05	0.0488192	0.121
Akt1	1095	2.52655e-07	2.09719e-06	0.24257	0.162999
Cdk2	1096	2.58614e-07	2.14501e-06	0.0996279	0.0723813
Med11	1096	2.43511e-06	1.75835e-05	0.118903	0.109846
Suco	1097	1.37525e-05	8.60676e-05	-0.0413606	0.160357
Tstd3	1098	2.61745e-07	2.16766e-06	0.0500244	0.0365461
Gm26877	1098	1.37562e-05	8.60676e-05	0.0374423	0.0849298
Sfxn1	1099	2.67364e-07	2.2125e-06	0.229583	0.0178315
Smco4	1101	2.76305e-07	2.28474e-06	0.2042	0.119271
Stn1	1102	1.50628e-05	9.3755e-05	-0.0655279	0.153671
Endod1	1103	3.14508e-07	2.57897e-06	0.224924	0.159476
Ssbp4	1104	3.15532e-07	2.5854e-06	0.23871	5.60195e-05
2700049A03Rik	1104	1.51369e-05	9.41617e-05	0.0228872	0.0447685
Angptl6	1105	1.51749e-05	9.43441e-05	0.0148164	0.0361386
Eif2ak2	1106	3.19442e-07	2.61546e-06	0.191199	0.0946929
Actb	1106	1.25909e-05	7.94659e-05	0.210224	0.193088
Ilkap	1107	3.25211e-07	2.66069e-06	0.203265	0.0669166
Ublcp1	1108	3.29045e-07	2.69002e-06	0.125317	0.0643891
Plekhf2	1108	1.55826e-05	9.65491e-05	0.0579534	0.126762
Ccdc122	1109	3.43539e-07	2.80427e-06	0.0803187	0.0387113
Prcp	1109	1.55831e-05	9.65491e-05	0.0437695	0.0445229
Mocs2	1110	3.4797e-07	2.83616e-06	0.182762	0.0182304
Irs2	1110	1.56874e-05	9.71401e-05	-0.0489072	0.0967863
Chrnb1	1111	3.5635e-07	2.9001e-06	0.160193	0.0720967
Vasn	1111	1.67618e-05	0.000103497	-0.331508	0.148369
Il15ra	1112	3.64926e-07	2.96099e-06	0.192475	0.122843
Espl1	1113	8.48136e-06	5.55032e-05	0.0338776	0.0335568
Mtch1	1114	3.78728e-07	3.06838e-06	0.261539	0.195705
Hist1h1c	1114	1.69818e-05	0.000104616	0.161447	0.17524
Dars	1115	3.79601e-07	3.07315e-06	0.172868	0.063382
Apol9b	1115	1.71559e-05	0.000105629	0.134049	0.154814
Nxt1	1116	3.80504e-07	3.07816e-06	0.191996	0.099146
Vegfb	1116	1.72864e-05	0.000106312	0.134836	0.15024
Nono	1117	3.93433e-07	3.18037e-06	0.249448	0.0773719
Ormdl2	1119	4.05036e-07	3.26928e-06	0.221774	0.156639
1810062G17Rik	1119	1.80819e-05	0.000110826	0.0385279	0.0521719
Tfam	1120	4.06856e-07	3.28153e-06	0.164418	0.118902
Lsp1	1120	1.84544e-05	0.000112853	0.0733632	0.11429
Isg15	1121	4.16155e-07	3.35403e-06	0.3885	0.119665
Erfe	1121	1.09141e-06	8.27853e-06	0.0449531	0.0430631
Prdm1	1122	1.86418e-05	0.000113742	0.0268693	0.0437306
Mcrip1	1123	4.19476e-07	3.37828e-06	0.228614	0.0241629
D5Ertd605e	1123	8.6377e-06	5.63559e-05	0.0976087	0.0920218
Btbd1	1124	4.30026e-07	3.4581e-06	0.19717	0.0597313
Parp2	1126	4.38924e-07	3.52442e-06	0.122113	0.104516
Polr3gl	1128	2.0166e-05	0.000122766	0.0611009	0.0708988
Chtop	1129	4.54242e-07	3.64201e-06	0.231191	0.172919
Peli1	1129	2.02951e-05	0.000123482	0.0708505	0.150353
Polr2i	1131	4.5891e-07	3.67399e-06	0.164858	0.092859
Phlpp1	1131	2.03864e-05	0.000123898	0.0574464	0.091937
Il18rap	1132	2.05522e-05	0.000124835	-0.0100637	0.14049
Pmepa1	1134	2.14482e-05	0.000129914	-0.067448	0.20579
Ilf2	1135	4.90816e-07	3.92653e-06	0.239942	0.176035
Tmem109	1136	4.92932e-07	3.94055e-06	0.17084	0.110087
Rcc1	1136	3.94092e-06	2.72391e-05	0.121517	0.111173
Etfb	1137	4.96891e-07	3.96926e-06	0.224519	0.172455
Scand1	1138	5.05444e-07	4.0346e-06	0.249021	0.0959357
Cox20	1138	2.23016e-05	0.000134931	0.127324	0.165552
Mrpl47	1139	5.20061e-07	4.14822e-06	0.149494	0.0977002
Wdr45b	1139	5.52443e-07	4.38311e-06	0.18769	0.154777
Rdm1	1140	5.21255e-07	4.15469e-06	0.129348	0.0949559
Tspan4	1141	5.25578e-07	4.18606e-06	0.246996	0.190162
Mthfd1l	1141	2.36955e-05	0.000143125	0.0909394	0.0909915
Bola2	1142	5.30926e-07	4.22555e-06	0.200861	0.126385
Nup35	1142	7.53334e-07	5.87048e-06	0.141287	0.119691
Plpbp	1143	2.46061e-05	0.000148294	0.0806401	0.140808
Slfn8	1144	9.22511e-06	5.99355e-05	0.0908417	0.0861139
Oscp1	1145	5.59472e-07	4.43318e-06	0.081341	0.0474723
Oser1	1145	2.4932e-05	0.000150175	-0.249469	0.207973
Smchd1	1146	2.13661e-05	0.000129489	0.168285	0.169124
Aloxe3	1147	2.5693e-05	0.000154244	0.0110669	0.0335614
Ldlrap1	1148	2.67576e-05	0.000160368	0.0858764	0.0979307
Rnps1	1150	5.96768e-07	4.71146e-06	0.237446	0.16461
Rgs19	1151	6.16357e-07	4.85903e-06	0.141855	0.0424333
Gipc2	1151	2.71997e-05	0.000162747	0.0371219	0.11165
Ndufb11	1152	6.3136e-07	4.97368e-06	0.254297	0.0950241
Coq10b	1152	2.73265e-05	0.000163416	-0.0878714	0.185451
Tcp11l1	1153	6.36836e-07	5.01318e-06	0.175342	0.133823
Abracl	1153	1.36833e-05	8.57105e-05	0.222529	0.210361
Cep290	1154	6.42109e-07	5.05101e-06	0.158829	0.0861965
Apoo	1158	6.78902e-07	5.32495e-06	0.188919	0.0609421
Sars	1158	2.82339e-05	0.000168563	0.159395	0.191226
Zfand4	1159	6.95741e-07	5.45308e-06	0.0444115	0.0377463
Cab39l	1159	3.49432e-06	2.44489e-05	0.0964718	0.0872988
Ndufaf8	1160	7.02961e-07	5.50568e-06	0.198617	0.12586
Eif2d	1160	2.87295e-05	0.000171427	0.0678975	0.120112
Gstcd	1161	7.07333e-07	5.53592e-06	0.0904282	0.0647918
Uqcrfs1	1163	7.25712e-07	5.67566e-06	0.252447	0.10058
Apol9a	1164	7.30438e-07	5.70849e-06	0.213723	0.164994
Ccnk	1165	3.04868e-05	0.000181413	0.0896088	0.115546
9930111J21Rik2	1166	3.05754e-05	0.00018184	0.0862425	0.103413
Cdca7l	1168	7.73092e-07	6.02011e-06	0.104598	0.0400485
Lamtor2	1168	3.12281e-05	0.000185416	0.135911	0.198941
Yif1b	1169	7.8026e-07	6.07155e-06	0.203911	0.077844
Reep5	1170	3.14436e-05	0.000186593	0.153951	0.216853
R3hdm4	1171	8.26563e-07	6.39965e-06	0.182683	0.0367619
Mthfd1	1172	8.45626e-07	6.5379e-06	0.104622	0.0793735
Tinagl1	1172	3.23458e-05	0.000191737	0.214575	0.22916
Krcc1	1173	8.85156e-07	6.82888e-06	0.218049	0.0943877
Eef1b2	1174	8.97303e-07	6.91274e-06	0.190714	0.154123
Pole2	1175	9.21406e-07	7.09339e-06	0.038319	0.0130345
Rcor2	1175	3.29737e-05	0.000195031	0.0306651	0.0391229
Hdgfl2	1176	9.26419e-07	7.12184e-06	0.149043	0.0642794
Hnrnpul1	1176	3.1191e-06	2.19942e-05	0.15326	0.131732
Rnaset2a	1177	9.30749e-07	7.15005e-06	0.210201	0.0536489
Parl	1177	4.95926e-06	3.36124e-05	0.164649	0.146032
Pcbp4	1178	9.4973e-07	7.28553e-06	0.180844	0.145361
D8Ertd738e	1179	9.6441e-07	7.3929e-06	0.236383	0.190191
Pnpla7	1179	3.38303e-05	0.000199553	0.079928	0.106738
Ankrd39	1180	9.76122e-07	7.47739e-06	0.110778	0.0624999
Mrpl45	1182	9.97106e-07	7.62734e-06	0.145934	0.086658
Txnrd2	1182	1.72263e-05	0.000106002	0.139922	0.130212
Mrpl16	1183	1.00744e-06	7.68625e-06	0.15931	0.0822728
Snu13	1184	1.03771e-06	7.90995e-06	0.245142	0.183265
Arrb2	1185	1.04225e-06	7.93899e-06	0.0694673	0.0456813
Hspd1	1185	3.58151e-05	0.000210458	0.0405594	0.203947
Slc38a1	1186	1.05302e-06	8.01541e-06	0.170756	0.123586
Tgif2	1186	3.60967e-05	0.000211882	0.0261386	0.0658653
Cib1	1187	1.06561e-06	8.10552e-06	0.160225	0.0536721
Akirin1	1187	3.63084e-05	0.000213009	0.0802209	0.158151
Lad1	1188	1.07402e-06	8.16273e-06	0.238895	0.0196922
Ecscr	1188	2.74054e-06	1.95413e-05	0.0715042	0.0627059
Ankrd54	1189	1.07464e-06	8.16273e-06	0.163229	0.136352
Cklf	1189	3.64343e-05	0.000213632	0.111274	0.13864
Tpgs2	1191	1.09387e-06	8.29135e-06	0.0844422	0.0346764
Six1	1192	3.7222e-05	0.000217897	0.070759	0.0853166
Bcl10	1193	3.81335e-05	0.000223112	-0.113404	0.193015
Hypk	1194	1.12874e-06	8.54968e-06	0.211709	0.144213
Gm6169	1194	3.93081e-05	0.000229612	0.0957973	0.0993819
Setd6	1195	1.1484e-06	8.68643e-06	0.127209	0.0272615
Cep162	1196	1.15489e-06	8.72944e-06	0.113135	0.0825635
Arl6	1196	1.42249e-06	1.06701e-05	0.109369	0.093947
Rab1b	1197	1.22549e-06	9.25011e-06	0.155712	0.10498
Mlkl	1198	3.68406e-06	2.55945e-05	0.150217	0.130123
Mrps7	1200	1.30973e-06	9.87058e-06	0.227324	0.135377
Nt5dc3	1200	4.11677e-05	0.000240215	-0.0253968	0.111704
Polr2c	1201	1.37292e-06	1.03269e-05	0.229368	-0.00528054
Isg20	1201	4.15764e-05	0.000242208	0.135523	0.175568
Sncg	1202	1.37814e-06	1.0359e-05	0.131186	0.0148552
Galnt1	1202	4.1797e-05	0.000243283	0.132281	0.176873
Mlf2	1203	1.38471e-06	1.04011e-05	0.23751	0.149023
Pdss1	1204	1.38612e-06	1.04046e-05	0.119101	0.0715424
Pwwp2a	1205	4.34549e-05	0.000252066	0.0394261	0.113457
Acd	1206	1.5214e-05	9.45332e-05	0.147073	0.133164
Tnfsf13b	1207	1.43319e-06	1.07429e-05	0.0774208	0.062346
Plekhj1	1208	1.46134e-06	1.09388e-05	0.22318	0.160133
2310033P09Rik	1210	1.49373e-06	1.11659e-05	0.155475	0.0907742
Kpna2	1210	4.66389e-05	0.00026895	0.0767632	0.106303
Cenpl	1211	4.42712e-05	0.000256252	0.0477124	0.0494741
Gpx4	1212	1.54326e-06	1.15202e-05	0.197482	0.0401084
Slc25a3	1212	4.6784e-05	0.000269643	0.171341	0.19092
Pop5	1213	1.55547e-06	1.15984e-05	0.225065	0.132158
Gas2	1214	1.55588e-06	1.15984e-05	0.0444457	0.0399863
Serp1	1214	2.55936e-05	0.000153732	0.214077	0.201691
Drg1	1215	1.58357e-06	1.17966e-05	0.179435	0.00123489
Fdps	1215	4.82262e-05	0.000277217	0.136913	0.198018
Uspl1	1216	4.91261e-05	0.000282091	0.0290004	0.118618
Supt16	1217	1.58833e-06	1.1824e-05	0.200741	0.0673584
Adm	1217	4.94268e-05	0.000283667	0.0504302	0.0714407
Fam89a	1218	1.61235e-06	1.1988e-05	0.0700889	0.0332448
Apol6	1219	1.61946e-06	1.20277e-05	0.0516644	0.0286758
Nme7	1220	1.6291e-06	1.20795e-05	0.10659	0.0224299
Zyx	1220	5.06825e-05	0.000289951	0.0933168	0.180735
Snrnp27	1221	1.62935e-06	1.20795e-05	0.218946	0.184397
Gpha2	1221	5.08687e-05	0.000290709	0.0225269	0.0675171
Ciita	1222	1.64022e-06	1.21518e-05	0.082252	0.0386045
A530040E14Rik	1223	1.65281e-06	1.22367e-05	0.0559317	0.0176854
Mest	1223	8.13129e-06	5.33736e-05	0.0532943	0.0490585
Prpf19	1224	1.66232e-06	1.22987e-05	0.212793	-0.00257275
Stard3nl	1225	1.74768e-06	1.28861e-05	0.182132	0.12114
Rtraf	1228	1.87799e-06	1.38187e-05	0.234005	0.173018
Rap2b	1228	5.60802e-05	0.000318474	-0.15832	0.178909
Ube2l3	1229	1.88581e-06	1.38669e-05	0.242804	0.178385
Nup133	1229	5.75242e-05	0.000326161	0.0603274	0.0662768
Chd1	1230	5.77921e-05	0.000327337	-0.00328013	0.191165
Eprs	1231	1.92842e-06	1.41609e-05	0.250119	0.119391
Cops3	1232	1.94105e-06	1.4244e-05	0.184843	0.115207
H3f3b	1233	1.99019e-06	1.45849e-05	0.205299	0.0815443
Aaas	1233	2.74969e-06	1.95936e-05	0.0710507	0.0622854
Drg2	1236	2.04372e-06	1.49569e-05	0.13869	0.0586325
Ndufs7	1237	2.0725e-06	1.51368e-05	0.239991	0.013203
Ptk2	1237	6.43809e-05	0.000361067	0.0327666	0.163238
Kat7	1238	2.11563e-06	1.54206e-05	0.131082	0.0810023
Phf6	1238	6.47546e-05	0.000362974	0.0655528	0.0858768
Tdp1	1239	2.11866e-06	1.54323e-05	0.0724308	0.0606295
Arl2	1241	2.16003e-06	1.5723e-05	0.215112	0.148576
Cyb561d2	1242	8.04391e-06	5.28641e-05	0.121616	0.105276
Mrpl1	1243	2.20685e-06	1.6035e-05	0.145072	0.0840098
CAAA01118383.1	1243	6.98758e-05	0.000390266	0.0783823	0.101211
Tmed1	1244	2.26554e-06	1.64468e-05	0.16736	0.0878997
Dap	1244	7.00264e-05	0.000390906	0.05634	0.221504
Zmat2	1245	2.27619e-06	1.65131e-05	0.210284	0.0736353
Bckdk	1246	2.28689e-06	1.65796e-05	0.143287	0.100434
Nphp1	1247	2.31226e-06	1.67523e-05	0.10561	0.0737454
Tmem79	1248	2.31635e-06	1.67707e-05	0.0954241	0.0405528
Vgll4	1248	7.31939e-05	0.000407537	0.0167642	0.138853
Tmem173	1249	2.40362e-06	1.73793e-05	0.119042	0.0826244
Tfdp1	1250	2.40634e-06	1.73874e-05	0.163167	0.133313
Larp1b	1250	7.36896e-05	0.000410085	-0.00845801	0.135675
Gm12216	1251	3.68685e-05	0.000215944	0.132164	0.121653
Apbb1ip	1252	2.51329e-06	1.81117e-05	0.139672	0.113144
Rfwd3	1254	2.52989e-06	1.8195e-05	0.12318	0.0921658
Timp1	1254	7.7772e-05	0.00043037	0.018725	0.248549
Mcrs1	1255	2.56681e-06	1.8436e-05	0.146275	0.0895287
Bud31	1255	7.7831e-05	0.000430468	0.163852	0.191843
Med24	1256	2.57949e-06	1.85026e-05	0.208877	0.117861
Magoh	1256	8.43774e-05	0.000464784	0.122549	0.190728
Nelfcd	1257	2.62205e-06	1.87706e-05	0.0758007	0.046322
Klhdc4	1258	2.67618e-06	1.91454e-05	0.1318	0.0903447
Gna13	1258	8.52887e-05	0.000469565	0.132032	0.16694
Lnpk	1259	8.56231e-05	0.000470927	0.0803975	0.111025
Prpsap1	1260	2.68977e-06	1.92299e-05	0.183193	0.0743169
2310022A10Rik	1260	1.33863e-05	8.39963e-05	0.0916548	0.083351
Ppie	1261	2.69873e-06	1.92812e-05	0.155782	0.0629495
Tomm6	1261	8.61149e-05	0.000473391	0.0745479	0.10243
Mtx1	1262	2.70586e-06	1.93194e-05	0.17568	0.130667
Ahcyl1	1263	8.74595e-05	0.000480295	0.0852245	0.123776
Cep135	1264	8.76276e-05	0.000480974	0.0605981	0.0692258
Gsr	1265	2.75181e-06	1.95958e-05	0.215595	-0.0497646
Sigmar1	1268	2.85072e-06	2.02735e-05	0.148924	0.0425143
Dusp10	1270	9.22945e-05	0.000505054	-0.128138	0.102428
Fam149a	1271	2.90571e-06	2.06104e-05	0.11005	0.0889002
Rps17	1271	1.23544e-05	7.81557e-05	0.180926	0.134814
Katnb1	1272	2.90817e-06	2.06143e-05	0.0757317	0.0378238
Asrgl1	1272	9.2592e-05	0.000506425	0.0522574	0.057731
Rmdn3	1273	2.92865e-06	2.07459e-05	0.153434	0.102428
Dctd	1274	2.97586e-06	2.10527e-05	0.122315	0.0369877
Ube2j2	1274	1.43073e-05	8.94121e-05	0.195453	0.171423
Phb	1275	2.98129e-06	2.10774e-05	0.203393	0.0665779
Bbs7	1275	1.98233e-05	0.000120747	0.039894	0.037704
Gpsm3	1276	3.01715e-06	2.1317e-05	0.183259	0.132281
Tomm7	1277	3.02225e-06	2.13391e-05	0.23512	0.0544229
Arhgap31	1277	9.65512e-05	0.000525689	0.0326495	0.0698315
Myb	1278	3.04555e-06	2.14896e-05	0.0613769	0.0429862
Tor3a	1278	4.86612e-05	0.000279569	0.134367	0.131764
Srp9	1280	3.24374e-06	2.28434e-05	0.230361	0.129837
Ccnf	1281	4.99017e-05	0.000285997	0.0447501	0.0446331
Irgm2	1282	3.25471e-06	2.28908e-05	0.121691	0.0893652
Gm28502	1282	0.000100134	0.000544103	0.0723697	0.0799854
Spop	1283	3.31664e-06	2.32961e-05	0.161518	0.118251
1190007I07Rik	1284	9.26729e-05	0.000506612	0.0901384	0.0913083
Mettl1	1285	3.34637e-06	2.34897e-05	0.156742	0.0517109
Sp110	1286	3.36483e-06	2.3604e-05	0.158918	0.0272707
BC003331	1286	0.000102408	0.000555344	0.0484969	0.102375
Thop1	1287	3.38133e-06	2.37044e-05	0.115307	0.076118
Nsd2	1287	2.39346e-05	0.000144489	0.198171	0.173176
Cdipt	1288	3.40841e-06	2.38787e-05	0.143016	0.0696697
Tbpl1	1288	0.000104294	0.000565003	0.0948774	0.136367
Abhd8	1289	3.44799e-06	2.41404e-05	0.135835	0.0854897
Mrto4	1291	3.52364e-06	2.46223e-05	0.214259	0.17159
Ssr2	1292	3.5592e-06	2.48547e-05	0.246301	0.159888
Mfsd1	1292	0.00010958	0.000591275	0.109573	0.117545
Snrnp40	1293	3.60565e-06	2.51628e-05	0.175167	0.0710281
Ppm1m	1293	0.000112859	0.000607148	0.0759736	0.0919307
Rpp25l	1294	3.6122e-06	2.51923e-05	0.13676	-0.0526109
Cdc25b	1294	5.20749e-05	0.000297445	0.0483795	0.0475979
Apol10b	1295	3.63352e-06	2.53247e-05	0.086273	0.054924
Tmem251	1295	0.000113423	0.00060988	-0.000328097	0.15375
Cs	1296	3.64084e-06	2.53594e-05	0.176507	0.112481
Nudt22	1297	3.65132e-06	2.53996e-05	0.0769349	0.0346079
Dclre1b	1298	0.000113766	0.000611421	0.0332957	0.0621072
Exosc5	1299	3.68662e-06	2.55959e-05	0.141647	0.0352265
Aimp1	1300	3.75265e-06	2.60209e-05	0.232421	0.103128
Arhgef1	1301	5.95482e-05	0.00033658	0.136918	0.126802
Icam1	1302	3.86283e-06	2.67335e-05	0.16858	0.0748959
Nav3	1302	0.000120011	0.00064243	0.0988376	0.131125
3110082I17Rik	1303	3.93531e-06	2.72177e-05	0.0897527	0.0344332
Smg9	1303	3.65318e-05	0.000214088	0.0935402	0.0878346
E2f4	1305	4.09922e-06	2.82972e-05	0.193189	0.0186501
Nfyb	1306	4.13374e-06	2.84991e-05	0.13758	0.00888175
Zswim7	1306	6.35963e-05	0.000357593	0.0740692	0.0730168
Pitpna	1307	4.15311e-06	2.86064e-05	0.225922	0.146806
3300005D01Rik	1307	0.000126198	0.000672893	-0.0263295	0.163305
Ltbr	1308	4.15458e-06	2.86064e-05	0.131125	0.024163
Pnp	1308	0.000127013	0.000676903	0.0263038	0.143608
Echs1	1309	4.17405e-06	2.87221e-05	0.160121	0.0207956
Clk4	1309	0.000127965	0.000681643	-0.0617306	0.136928
Rnf14	1310	4.19754e-06	2.88654e-05	0.118695	0.0217207
Borcs7	1310	0.000129081	0.000686226	0.0528039	0.0802795
Ubl4a	1311	4.20863e-06	2.89233e-05	0.193394	0.0977287
AC127341.3	1312	0.000131828	0.000699809	0.0230715	0.0771724
Pck2	1313	4.26006e-06	2.92582e-05	0.0885927	0.0574308
Apobec3	1314	4.33054e-06	2.97234e-05	0.0963554	0.0156915
Lama3	1314	0.000133415	0.000707535	-0.149387	0.128304
Gpn3	1316	4.41111e-06	3.0238e-05	0.103906	0.0701535
Nfil3	1316	0.000133665	0.000708517	0.092798	0.11839
Foxo1	1317	0.000133838	0.000709087	-0.039613	0.132032
Mrps23	1318	4.45079e-06	3.04907e-05	0.153561	0.02605
Polr2j	1319	4.47385e-06	3.06159e-05	0.22064	0.0880934
Gm45716	1320	4.47547e-06	3.06159e-05	0.121834	0.0508732
Lsm11	1320	0.000138017	0.000729795	0.0761017	0.0891081
Riox2	1321	4.47754e-06	3.06159e-05	0.0864647	0.0448334
Ica1	1321	9.34448e-05	0.000510574	0.0468405	0.0454449
Casp3	1322	4.50629e-06	3.07929e-05	0.255408	0.0238174
Gm17056	1323	0.00013916	0.000734547	0.0131139	0.0439168
Gipc1	1324	4.58019e-06	3.12585e-05	0.16431	0.0506416
Cyb5r3	1324	0.000142683	0.000752632	0.0918536	0.17618
Sri	1325	4.70501e-06	3.20699e-05	0.229943	0.0657534
Col7a1	1325	0.000144267	0.000760245	-0.12545	0.144774
Farsb	1326	4.84986e-06	3.29949e-05	0.126145	0.0687106
Psmc5	1327	4.9226e-06	3.34058e-05	0.227802	0.134285
Dnal4	1327	8.67576e-06	5.65361e-05	0.113017	0.0964921
Dtd1	1328	4.92718e-06	3.34159e-05	0.137495	0.0671595
Gm29666	1328	0.000146572	0.000770141	0.0510672	0.0560786
Pla1a	1330	0.000147179	0.000772959	0.0556079	0.0935502
Mrps9	1331	4.99952e-06	3.38641e-05	0.169754	0.103297
Kctd13	1331	7.50031e-05	0.000416325	0.0748094	0.0726163
Rdh5	1332	0.000151923	0.000796325	0.0447794	0.0812888
Aldh18a1	1333	5.16114e-06	3.48715e-05	0.0693603	0.0388929
Nop10	1334	5.30814e-06	3.582e-05	0.223681	0.0875289
Sacs	1334	0.000158096	0.00082788	0.0477449	0.0533835
N4bp3	1335	0.000158404	0.000829093	0.095141	0.0991137
Derl2	1336	5.3598e-06	3.61011e-05	0.163826	0.0753958
Rin1	1337	5.42783e-06	3.65366e-05	0.0919325	0.0480169
Ssr4	1337	0.000159879	0.000836003	0.106187	0.186141
Epb41l4aos	1338	0.000160579	0.000839259	0.0792735	0.115856
Bcap29	1339	5.47246e-06	3.67913e-05	0.127134	0.100742
Fancm	1339	5.95904e-05	0.000336642	0.0443983	0.0420407
Mea1	1340	5.54087e-06	3.7228e-05	0.204125	0.128894
Arpc4	1340	0.000165369	0.000861381	0.152906	0.168897
Baz1b	1341	5.7426e-06	3.85595e-05	0.202325	0.118902
Ugp2	1341	0.000165933	0.000863338	0.055188	0.123567
Baiap2	1342	0.000167086	0.000868655	-0.196179	0.190751
Abcb8	1343	5.80827e-06	3.89521e-05	0.0809665	0.0289358
Itpkc	1343	0.000167597	0.00087089	-0.00767036	0.0619398
Polr2l	1344	5.92833e-06	3.97327e-05	0.178511	0.0175868
Ing1	1344	0.000105691	0.000572285	0.162975	0.157107
Gnl1	1346	6.08043e-06	4.07017e-05	0.200181	0.147676
Nr4a2	1347	0.000175851	0.000910723	-0.169551	0.0876061
Rab3ip	1348	6.16793e-06	4.12364e-05	0.156336	0.0838121
Lsm12	1349	6.22821e-06	4.15729e-05	0.219026	0.177985
Rpl27-ps3	1349	4.18284e-05	0.000243283	0.160364	0.14467
Polr3k	1350	6.22979e-06	4.15729e-05	0.157281	0.00568094
Ywhah	1350	7.06764e-06	4.68464e-05	0.239488	0.190448
Psmd9	1351	6.28885e-06	4.19412e-05	0.176525	0.137187
1810022K09Rik	1352	6.44859e-06	4.29536e-05	0.154149	-0.00594386
Arl6ip1	1353	6.53149e-06	4.34523e-05	0.259537	0.133437
Nr4a1	1353	0.00018222	0.000938767	0.00239233	0.0703748
Sf3b6	1354	6.57363e-06	4.37058e-05	0.233089	0.174349
Ecm1	1354	0.000186587	0.000960349	-0.408249	0.208455
Gpatch11	1355	6.62458e-06	4.40175e-05	0.10691	0.0724343
Morc3	1356	6.6656e-06	4.42628e-05	0.13689	0.0468889
Strap	1356	1.11393e-05	7.13441e-05	0.210009	0.171605
Cnpy2	1361	7.07262e-06	4.68507e-05	0.232113	-0.0192951
Psma5	1361	9.95381e-06	6.42074e-05	0.234776	0.196144
Mettl16	1362	7.08141e-06	4.68802e-05	0.162024	0.0809998
Cherp	1363	7.13788e-06	4.72252e-05	0.119158	0.0615738
Mylpf	1363	0.000193442	0.000993273	0.0292447	0.0322506
Epn2	1365	7.31922e-06	4.83659e-05	0.208228	-0.00123955
Tmed5	1365	6.86666e-05	0.000384107	0.196632	0.175792
Gpx8	1366	7.40379e-06	4.88948e-05	0.202705	0.0825201
Slc6a4	1366	0.000197252	0.00101139	0.000886039	0.0674089
Rbfa	1367	7.42096e-06	4.89783e-05	0.115558	0.0659196
Pxmp2	1367	8.97103e-06	5.83548e-05	0.0380412	0.0337742
Gusb	1368	7.63501e-06	5.03297e-05	0.128208	0.0753692
M1ap	1368	0.000201698	0.00103175	0.0406652	0.0863912
Ccdc66	1369	7.83006e-06	5.15526e-05	0.0764678	0.046269
Neat1	1369	0.000202166	0.00103268	-0.743077	0.250103
Psmg1	1370	7.91219e-06	5.20617e-05	0.113088	0.0305227
Hdac2	1371	7.93769e-06	5.21978e-05	0.191176	0.0445206
Pstpip1	1372	0.000205224	0.00104682	0.0394017	0.0676324
Pgp	1373	8.05686e-06	5.29171e-05	0.147985	0.0268077
Nsl1	1374	5.37011e-05	0.000305927	0.0303086	0.0284966
Hnrnph3	1375	8.20186e-06	5.38042e-05	0.181853	0.114654
Bet1	1376	8.32202e-06	5.45594e-05	0.117307	0.0439223
Lxn	1376	1.22577e-05	7.76798e-05	0.195245	0.161516
Anxa3	1377	8.34635e-06	5.46734e-05	0.25927	0.0660086
Naa20	1378	8.49151e-06	5.55275e-05	0.216944	0.0397521
Mb21d1	1378	1.53019e-05	9.497e-05	0.0995307	0.0871326
Smc5	1379	8.57034e-06	5.59839e-05	0.163057	0.133945
Msh2	1380	8.5968e-06	5.61229e-05	0.113142	0.0334446
Ywhaz	1381	0.000217778	0.00110357	0.123201	0.177009
Dap3	1382	8.65738e-06	5.64503e-05	0.179828	0.108533
Tpm4	1383	0.00022101	0.00111786	0.142214	0.190673
AC125149.3	1384	8.72563e-06	5.68268e-05	0.0554065	0.0304119
Hdhd2	1384	0.000112095	0.00060334	0.113742	0.106834
Tnrc6a	1385	8.75087e-06	5.69569e-05	0.160277	0.103107
Rnf19b	1386	0.000227227	0.00114662	-0.203229	0.195506
Slc19a2	1388	0.000229696	0.00115854	0.0195503	0.0669128
Trnau1ap	1389	9.28369e-06	6.02438e-05	0.174097	0.0592697
Gar1	1389	2.71808e-05	0.000162724	0.211803	0.174847
Ccdc43	1390	9.3948e-06	6.09283e-05	0.106459	0.0258439
Mrps36	1391	9.52014e-06	6.17042e-05	0.190382	0.15267
Ing5	1392	9.53414e-06	6.17579e-05	0.117862	0.0922591
Prss16	1392	0.00023688	0.00119089	0.0484411	0.051648
Scfd1	1393	9.60759e-06	6.21965e-05	0.143999	0.0525152
Gon7	1393	0.000241404	0.00121307	0.0595478	0.0772695
B930036N10Rik	1394	9.64913e-06	6.24281e-05	0.0973789	0.0793115
Prmt7	1395	9.65786e-06	6.24472e-05	0.131821	0.0140671
Lsm1	1396	9.73821e-06	6.28916e-05	0.21422	0.0516659
Slc2a1	1396	0.000247013	0.00123953	-0.00971442	0.127445
Mapk14	1397	9.81449e-06	6.33465e-05	0.0825987	0.0378251
Tedc2	1398	0.000250219	0.00125391	0.0298327	0.031909
Rplp0	1399	0.000250227	0.00125391	0.109095	0.10862
Tada2a	1400	1.00897e-05	6.5045e-05	0.0829097	0.0570613
Exosc10	1402	1.03333e-05	6.65762e-05	0.12093	0.0890225
Trappc5	1403	1.04206e-05	6.70984e-05	0.153695	-0.0344484
Selenow	1404	1.06431e-05	6.84903e-05	0.239539	-0.0540018
Ufsp2	1404	1.15356e-05	7.35651e-05	0.119951	0.0991628
Mtfr2	1405	1.07925e-05	6.93281e-05	0.0360118	0.0260724
Dis3	1406	1.08535e-05	6.96786e-05	0.118667	0.0223058
Tomm40l	1407	1.09396e-05	7.01895e-05	0.081492	0.0575804
Nvl	1408	1.10147e-05	7.063e-05	0.133915	-0.0236953
Phf13	1408	0.000267768	0.00133563	0.0357567	0.0950254
Tctex1d2	1409	1.10685e-05	7.09325e-05	0.14144	0.101439
Rsrc2	1410	0.00027173	0.0013529	0.0573259	0.17747
Ubac2	1411	1.11627e-05	7.14186e-05	0.123873	0.0640896
Kat2a	1412	1.11641e-05	7.14186e-05	0.111307	0.0063417
Ola1	1413	1.13877e-05	7.2763e-05	0.209613	0.15681
Iffo2	1413	0.000273337	0.00136028	-0.0131004	0.0927913
Irf2bpl	1414	1.14976e-05	7.34218e-05	0.141642	0.0815865
Cdk11b	1414	0.0002741	0.00136345	0.0701122	0.143242
BC029722	1415	1.15076e-05	7.34421e-05	0.103745	0.0476398
Arhgap29	1415	0.000276136	0.00137168	0.0134893	0.0613611
Mmp9	1416	0.000163071	0.000851051	0.266632	0.267692
Rsad2	1417	1.15404e-05	7.35651e-05	0.10941	0.0745376
Wbp1	1418	1.19386e-05	7.60136e-05	0.138835	0.109689
Parp3	1418	0.000286504	0.00141733	-0.000680309	0.104714
Sh3glb2	1420	1.19591e-05	7.60993e-05	0.146243	0.0685847
Rapgef3	1420	0.000290461	0.00143494	0.00446915	0.0789793
Cep78	1421	1.20344e-05	7.65065e-05	0.0404462	0.0265723
Eif4e	1421	0.0002973	0.00146471	0.148567	0.176499
Rack1	1422	1.20372e-05	7.65065e-05	0.172045	0.0943624
Pycrl	1423	1.20714e-05	7.66792e-05	0.121193	0.0591243
Casc1	1423	0.000299554	0.00147448	-0.000126898	0.0384434
Tmem51	1424	1.21178e-05	7.69116e-05	0.099241	0.0471908
Timm8a1	1425	1.21223e-05	7.69116e-05	0.213605	0.109775
Nup93	1425	0.000303203	0.00148838	0.0649033	0.0706552
Atm	1426	1.21695e-05	7.71663e-05	0.0684559	0.0148721
Atxn2l	1426	0.000165984	0.000863338	0.108659	0.106132
Adgrg3	1427	5.70023e-05	0.000323372	0.109438	0.097446
Pcbp2	1428	0.000307807	0.00150892	0.0749442	0.171665
Padi3	1429	1.23032e-05	7.78994e-05	0.0463538	0.0377482
Slf1	1429	4.98317e-05	0.000285839	0.0832427	0.0737202
Commd10	1430	1.23067e-05	7.78994e-05	0.0952612	0.062434
2810474O19Rik	1430	0.00031055	0.00152168	0.135679	0.182305
Fxr1	1431	0.000312904	0.00153252	0.0720984	0.155334
Nudt3	1432	1.23988e-05	7.83908e-05	0.142471	0.0756021
Ccdc58	1432	2.24864e-05	0.000135974	0.151233	0.126438
Stard10	1433	1.24229e-05	7.84514e-05	0.170669	0.0705366
Phtf2	1433	0.00032194	0.00157464	-0.0488295	0.0580716
Rela	1434	0.000324018	0.00158337	-0.144121	0.165021
Fam149b	1435	1.26256e-05	7.96381e-05	0.0772675	0.0364189
Sfn	1435	0.000326475	0.00159466	-0.609843	0.253986
Top3a	1436	0.000329741	0.00160916	0.0373954	0.0394073
Tmem167	1437	1.26659e-05	7.98463e-05	0.22296	-0.023958
Elp4	1437	0.000331286	0.00161597	0.0405592	0.0538398
Capn10	1438	1.30854e-05	8.23945e-05	0.0875478	0.0276691
Ash2l	1439	1.31313e-05	8.26353e-05	0.146061	-0.0261008
Pafah1b1	1439	0.000331768	0.00161759	-0.0068177	0.171016
Nt5m	1440	1.33072e-05	8.3645e-05	0.0914593	0.0539845
Zfp598	1441	1.33214e-05	8.36857e-05	0.12064	0.0764893
Nhej1	1441	0.000335152	0.00163262	0.0397132	0.0512824
Stat2	1442	1.33623e-05	8.38941e-05	0.143873	0.0539724
4930503L19Rik	1442	4.99885e-05	0.000286283	0.0772828	0.0683688
Nsmce3	1444	1.36026e-05	8.53039e-05	0.12259	0.00215762
Wdr12	1445	1.36733e-05	8.56975e-05	0.149732	0.0748995
1110065P20Rik	1445	0.000169845	0.00088215	0.137109	0.134829
Upf3b	1446	1.41802e-05	8.86694e-05	0.132276	0.062705
Enpp4	1448	1.44088e-05	8.9995e-05	0.114464	0.0134968
Mir155hg	1448	0.000343189	0.00166802	-0.0110996	0.0450704
Lamtor4	1449	1.4441e-05	9.01441e-05	0.195545	0.0969721
Sec61g	1450	1.46058e-05	9.11198e-05	0.231338	0.103744
Mvk	1450	0.000346421	0.00168071	0.0618351	0.0636589
Fra10ac1	1451	1.46894e-05	9.15885e-05	0.0546938	0.0312383
Abce1	1452	1.48813e-05	9.27315e-05	0.188694	0.126547
Rnf181	1452	0.000174905	0.000906693	0.0841948	0.0810451
Eef1akmt1	1453	1.50114e-05	9.34885e-05	0.136205	-0.001163
Ccz1	1453	5.55915e-05	0.000316031	0.157985	0.137566
Mdm1	1454	6.43743e-05	0.000361067	0.0326881	0.0297634
Bud23	1455	1.52804e-05	9.48911e-05	0.131686	0.0405265
Gps2	1456	0.000298444	0.00146968	0.111909	0.113245
Mpg	1457	1.55677e-05	9.65491e-05	0.132637	0.0864438
Eml5	1457	0.000369935	0.00178838	0.00762461	0.0326077
Ddx11	1459	1.58141e-05	9.78687e-05	0.0491318	0.0366983
Crybg3	1459	0.000373647	0.00180471	0.023875	0.0635138
Misp	1460	1.63158e-05	0.000100916	0.121739	0.0430946
Ptcd2	1461	1.63347e-05	0.000100974	0.087853	0.0451019
Zbtb2	1462	0.000379244	0.00182685	-0.0105054	0.0755787
Steap2	1463	1.67556e-05	0.000103497	0.144534	0.0425044
Adam33	1463	0.000379795	0.0018284	0.0289093	0.0296166
Hnrnpm	1464	1.68543e-05	0.000104008	0.206694	0.0732822
Pomp	1464	4.64074e-05	0.000267758	0.208366	0.173868
Bccip	1466	1.68833e-05	0.000104128	0.163827	0.0132453
Rrp1	1467	1.69486e-05	0.000104472	0.214573	0.0345418
Cdc34	1468	1.75585e-05	0.000107924	0.187855	0.0968179
Tmem160	1469	1.76981e-05	0.00010872	0.152901	0.0879165
R3hdm1	1470	1.77248e-05	0.000108822	0.181891	0.110315
Xrcc5	1471	1.77388e-05	0.000108846	0.0975935	0.0473798
Nup205	1472	1.78853e-05	0.000109683	0.0757268	0.0384827
Cgref1	1472	0.000392889	0.00188336	0.0535985	0.0848221
Traf3ip1	1473	1.81111e-05	0.000110942	0.0735315	-0.033973
H2-Q6	1473	0.000394055	0.00188811	0.129184	0.179486
Cchcr1	1474	1.83415e-05	0.00011229	0.0716032	0.0546246
Pter	1475	1.8397e-05	0.000112566	0.0796231	0.0529417
Irx2	1475	0.000399489	0.00191246	0.125971	0.139207
Steap1	1476	1.85109e-05	0.000113092	0.10982	0.0323952
Rpl7l1	1477	1.85143e-05	0.000113092	0.186532	-0.00518766
Ifrd2	1477	0.000204604	0.00104464	0.112425	0.109226
Trmt10a	1478	0.000255935	0.00128015	0.0961855	0.0979672
Nr2c2ap	1479	1.85673e-05	0.000113352	0.137119	-0.00197305
Scin	1479	0.000411886	0.00196833	0.00447404	0.0498816
Smg5	1481	1.96751e-05	0.000119979	0.111799	0.0271561
Gm4951	1482	1.97856e-05	0.000120585	0.116844	0.0407252
Ubap1	1482	0.000425353	0.0020291	0.0974613	0.115663
Jade1	1483	2.50963e-05	0.000150996	0.0945326	0.0777369
Cse1l	1484	2.03811e-05	0.000123898	0.11795	0.0689833
Git1	1484	0.000428983	0.00204191	0.078522	0.0965589
H2-Q7	1485	0.000114632	0.000615772	0.212828	0.186849
Ift88	1486	2.06347e-05	0.000125266	0.0725352	0.0475545
mt-Atp8	1486	0.000440441	0.0020882	0.0411989	0.145663
4933434E20Rik	1487	2.06656e-05	0.000125384	0.16207	0.117382
Faim	1488	2.11629e-05	0.000128329	0.154057	0.0508926
Slc39a4	1489	2.20437e-05	0.000133445	0.14239	0.0325428
Zfx	1489	0.000452704	0.00214539	-0.0433317	0.13117
Gas2l3	1491	0.000462687	0.00218982	0.0464401	0.0485063
Gimap9	1492	2.26309e-05	0.000136771	0.0713034	0.0332774
Nampt	1493	4.18152e-05	0.000243283	0.142794	0.120235
Slc35g1	1494	0.000463844	0.00219434	0.02555	0.0313584
Cnnm4	1495	0.000465954	0.00220143	0.0455144	0.0623339
Syne3	1498	2.44002e-05	0.000147217	0.0543701	0.0461064
Chek2	1498	5.29492e-05	0.000301961	0.0279862	0.0250807
Pole4	1500	2.45107e-05	0.000147802	0.204719	0.0763955
Pradc1	1500	0.000479007	0.00226015	0.0490485	0.0613112
Get4	1501	2.49756e-05	0.000150354	0.170825	0.0623865
Hsp90ab1	1501	0.000483721	0.0022804	-0.139312	0.120296
Cnn3	1504	2.52558e-05	0.000151872	0.212384	0.100253
Scx	1504	0.0004998	0.00235108	0.0333769	0.100307
Nfkbil1	1505	2.53288e-05	0.000152226	0.108857	0.0177833
Ddx39b	1506	2.6146e-05	0.000156876	0.203506	0.0377046
Efnb1	1506	0.000509284	0.00238946	0.0364068	0.0932545
Mtx2	1507	2.63067e-05	0.000157753	0.182993	0.0320295
Glt28d2	1507	0.000519001	0.00243082	0.0263629	0.045476
Mtf1	1508	0.000519893	0.00243291	0.0591098	0.102098
Selenot	1509	2.69304e-05	0.000161314	0.18681	0.110547
Cyp2j6	1509	0.00052065	0.0024354	0.0201738	0.0316661
Kcmf1	1510	0.000526689	0.00246046	-0.108947	0.157787
Swi5	1511	2.73435e-05	0.000163427	0.213718	0.0830065
Sc5d	1512	2.76141e-05	0.000164953	0.117447	0.026288
Dnaaf2	1512	0.0003234	0.00158107	0.0337307	0.0340587
Sh3bgrl3	1513	5.52717e-05	0.000314378	0.220375	0.17973
Mark3	1514	0.00053646	0.00249963	-0.0822039	0.155516
Pip5k1a	1515	0.000542375	0.00252393	-0.0163009	0.136504
Crem	1516	0.000544996	0.00253504	0.0331941	0.0910349
Tmem29	1517	2.9627e-05	0.000176685	0.101163	0.05797
Coasy	1518	2.9848e-05	0.000177904	0.0953353	-0.00228255
Fbf1	1518	0.000295083	0.00145644	0.0640895	0.0640407
Pop4	1520	2.99525e-05	0.000178429	0.0691708	0.05137
Tmem80	1520	0.000557669	0.00258843	0.0578392	0.0653634
Gm7160	1521	3.01021e-05	0.000179222	0.0404146	0.0316849
Sult2b1	1521	0.000558326	0.00259036	0.00390437	0.135146
Pnkp	1522	3.09389e-05	0.000183901	0.0826708	0.0576587
Vps37b	1522	0.000560769	0.00259947	-0.105452	0.0972246
[truncated: 8,825 more rows]

## Sheet: 2- LP INV
	Top	p.value	FDR	logFC.1	logFC.3
Malat1	1	3.74589e-85	4.05456e-81	0.990151	0.473533
Ubc	1	1.16483e-67	4.20271e-64	0.616073	1.2602
Lgals3	2	8.05466e-82	4.35918e-78	1.26815	0.884244
Ndrg1	2	5.8271e-66	1.57681e-62	1.12484	1.17997
Phlda1	3	1.16011e-65	2.5114e-62	0.604798	1.32675
Anxa1	3	1.20794e-64	2.17913e-61	1.01291	0.407209
Hmox1	4	2.27156e-64	3.51249e-61	0.632996	1.58911
Cxcl1	5	5.28441e-63	7.1498e-60	2.27064	1.54779
Hbegf	5	5.4182e-51	4.88722e-48	0.44518	1.30337
Clu	6	2.31645e-60	2.78591e-57	1.40927	-0.049526
Btg1	6	1.35108e-47	1.12493e-44	0.437148	0.854071
Fn1	7	3.77207e-59	4.08289e-56	1.2066	0.107033
Cp	8	1.36814e-52	1.34625e-49	0.992554	-0.10243
Neat1	8	2.34716e-42	1.81469e-39	0.743077	0.99318
Fam107b	9	3.98912e-42	2.87674e-39	0.799244	0.418763
Cdkn1a	9	1.44429e-41	9.19586e-39	-0.14538	0.843037
C3	10	4.25239e-42	2.87674e-39	0.867445	0.158715
Hspa8	10	1.50157e-40	8.55423e-38	0.573675	0.717862
Sqstm1	11	4.4621e-41	2.68321e-38	0.819664	0.810143
Hsp90aa1	11	2.4879e-39	1.22405e-36	0.27322	0.708698
Fth1	12	7.01329e-40	3.79559e-37	0.645979	0.320277
Areg	12	1.96211e-38	9.23388e-36	0.295685	1.21138
Cd9	13	1.13754e-39	5.86318e-37	0.793773	0.152331
Emp1	14	1.24164e-37	5.59981e-35	0.548582	0.675032
Map1lc3a	14	5.87229e-37	2.30458e-34	0.746989	0.287184
Hsph1	15	1.95975e-37	8.48492e-35	0.422194	0.889968
B2m	15	5.96158e-37	2.30458e-34	0.457827	0.188832
Fosl1	16	2.48794e-37	1.03575e-34	0.27452	0.877612
Col6a1	16	8.84449e-37	3.30113e-34	0.781333	0.463915
Ptgs2	17	3.59212e-36	1.29604e-33	0.870477	0.77376
Clcf1	17	2.20485e-35	7.45792e-33	0.263036	0.795287
H2-D1	18	7.53293e-36	2.63021e-33	0.533585	0.086316
Ccnl1	18	3.10276e-35	1.0177e-32	0.381856	0.74543
Top1	19	7.33098e-35	2.33384e-32	0.67568	0.387504
Dnajb1	19	6.35569e-33	1.76395e-30	0.178744	0.900309
Cst3	20	1.04707e-34	3.23813e-32	0.664605	0.196262
Nppb	20	1.89477e-32	4.89567e-30	0.313743	0.735682
Tm4sf1	21	1.28668e-34	3.86863e-32	0.75813	0.242043
Inhba	21	1.89965e-32	4.89567e-30	0.398519	0.954509
Slco2a1	22	8.75235e-34	2.56042e-31	0.698219	0.267888
Pthlh	22	2.0446e-32	5.14669e-30	0.0786425	0.681784
Ahnak	23	1.56211e-33	4.44956e-31	0.596658	0.185335
Zfand5	23	2.42919e-31	5.97582e-29	0.633519	0.681788
Ier3	24	7.97957e-33	2.15927e-30	1.01183	0.952396
Zfand2a	24	6.82221e-31	1.64097e-28	0.220582	0.525173
Rsbn1	25	7.83204e-31	1.84291e-28	0.0748385	0.744264
Tmem59	26	8.28125e-31	1.90716e-28	0.635563	0.0266195
Mast4	26	2.7418e-30	6.18276e-28	0.457662	0.696434
Plk3	27	6.10604e-30	1.34881e-27	0.112411	0.526875
Ltbp3	27	7.70728e-29	1.63576e-26	0.578501	-0.00500632
Atf3	28	4.59148e-29	9.93964e-27	-0.423704	0.814909
Itm2b	28	4.594e-28	9.38217e-26	0.588168	0.13443
Klf6	29	4.47022e-28	9.30493e-26	0.292181	0.803832
Npc2	30	1.45391e-27	2.8102e-25	0.501283	0.161953
Ifrd1	31	6.25858e-28	1.2545e-25	-0.144153	0.743261
Pnrc1	31	4.02398e-27	7.38231e-25	0.686228	0.685331
Klf5	32	9.32112e-28	1.8344e-25	0.288634	0.674955
Aldoa	32	2.62344e-26	4.6551e-24	0.684718	0.405189
Ftl1	33	3.52257e-26	6.14973e-24	0.434041	0.384365
S100a10	34	1.90206e-27	3.61191e-25	0.0671004	0.431846
Cebpb	34	4.78676e-26	8.2241e-24	0.827779	-0.230632
Il1a	35	3.93372e-27	7.34114e-25	0.392728	0.667136
Tpt1	35	5.65174e-26	9.5585e-24	0.352185	0.144496
Cd44	36	6.88474e-26	1.14647e-23	0.592549	0.565848
Vasn	37	2.27866e-26	4.1107e-24	0.331508	0.479877
Csf3	37	1.14893e-25	1.88425e-23	1.07802	0.11268
Sfn	38	1.18376e-25	1.91238e-23	0.609843	0.863829
Crlf1	38	1.27841e-25	2.03493e-23	0.568722	0.0986745
Pdgfrl	39	7.73709e-25	1.16314e-22	0.576093	-0.0734798
Gjb4	40	1.5893e-25	2.49313e-23	0.425838	0.651511
Car9	40	9.21834e-25	1.36684e-22	0.533353	0.258465
Ier5	41	3.13819e-25	4.85254e-23	0.295136	0.63381
Csrnp1	42	5.08998e-25	7.75971e-23	0.0460846	0.405518
Plet1	42	1.94378e-24	2.76835e-22	0.698039	0.667949
Klf4	43	1.38729e-24	2.0292e-22	0.0743147	0.589857
Fxyd3	43	2.14233e-24	3.0115e-22	0.641305	-0.0605678
Sgk1	44	1.67557e-24	2.41818e-22	0.267407	0.745481
Ctsh	44	7.45507e-24	1.03453e-21	0.557526	0.115258
Il11	46	3.09507e-23	4.24064e-21	0.18114	0.39987
Smox	46	3.50509e-23	4.74238e-21	0.515471	0.205062
Dnajb4	47	5.33827e-23	7.13352e-21	0.286175	0.482673
Nfkbia	47	1.00575e-22	1.3116e-20	0.770857	0.745893
Dusp5	48	8.84494e-23	1.16753e-20	-0.0603637	0.481003
Col6a2	48	1.63373e-22	2.08041e-20	0.350806	0.163565
Dnaja1	49	1.21132e-22	1.56087e-20	0.46784	0.578843
Mtss1	49	4.29745e-22	5.22647e-20	0.568417	0.281382
Cyr61	50	1.82793e-22	2.30064e-20	0.519024	0.847747
Psap	50	1.08461e-21	1.30443e-19	0.502995	0.169411
Cxcl2	51	1.85564e-22	2.30867e-20	0.926142	1.00249
Lrrfip1	51	2.97333e-21	3.53663e-19	0.539387	0.407964
Lamp2	52	4.84527e-21	5.57928e-19	0.459165	0.140221
Hspa1b	53	4.1642e-22	5.12196e-20	0.242336	0.476161
Atp2b1	53	6.03648e-21	6.80613e-19	0.505113	0.107055
Laptm4a	54	6.36007e-21	7.09705e-19	0.478201	0.187816
Cldn4	55	3.97621e-21	4.6781e-19	0.547071	0.708813
Spp1	55	9.25038e-21	1.00126e-18	0.978858	0.402365
Tnfrsf12a	56	4.47321e-21	5.20624e-19	0.236546	0.456309
Fau	56	2.46533e-20	2.51743e-18	0.303499	0.0499539
Nfkb1	57	6.01447e-21	6.80613e-19	0.495389	0.581546
Junb	57	2.94778e-20	2.98194e-18	0.689735	0.334393
Vim	58	6.68416e-21	7.38259e-19	0.0243277	0.817692
Cited2	58	3.62887e-20	3.63694e-18	0.683125	0.681371
Pim1	59	7.76478e-21	8.48949e-19	0.490984	0.645312
Lcn2	59	4.94738e-20	4.91288e-18	0.818643	-0.704873
Kdm6b	60	9.63195e-21	1.03224e-18	0.135564	0.426303
Sox9	61	1.36742e-20	1.45107e-18	0.205549	0.618556
Ddx5	61	1.08529e-19	1.04885e-17	0.394258	0.0742985
Jmjd1c	62	1.44647e-20	1.52005e-18	0.231444	0.530424
Gabarap	62	1.42694e-19	1.36683e-17	0.449219	0.222496
Ecm1	63	1.54978e-20	1.61296e-18	0.408249	0.616704
Rpl10	63	2.43073e-19	2.30791e-17	0.34932	0.016648
Fndc3b	64	2.9161e-19	2.74468e-17	0.401065	0.241623
Adamts1	65	2.22349e-20	2.2921e-18	0.205729	0.484614
Srxn1	66	5.2899e-20	5.20526e-18	0.0826912	0.491019
Epcam	66	7.98016e-19	7.44631e-17	0.600627	-0.150768
Maff	67	7.1255e-20	6.94833e-18	0.337483	0.458891
Pfdn5	67	1.24128e-18	1.13861e-16	0.496272	-0.061313
Srrm2	68	1.3747e-18	1.2504e-16	0.417926	0.0189425
Tob1	69	1.23698e-18	1.13861e-16	0.114348	0.323553
Zbtb20	69	2.1361e-18	1.91084e-16	0.373675	0.0936135
4930523C07Rik	70	2.28869e-18	2.03056e-16	0.562786	0.340068
Dusp14	71	2.1321e-18	1.91084e-16	-0.0184762	0.332448
Tanc2	71	3.56708e-18	3.08881e-16	0.365642	0.137904
Eif1	72	2.73446e-18	2.40633e-16	0.129617	0.295109
Mmp10	72	5.90985e-18	5.07684e-16	0.598691	0.570331
Fosb	73	2.79839e-18	2.44272e-16	0.0876814	0.516837
Ctsd	73	8.0185e-18	6.83404e-16	0.512746	0.158034
Ext1	74	8.60302e-18	7.27493e-16	0.364167	-0.0293934
Hspb8	74	1.81325e-17	1.49821e-15	0.418928	0.556025
Mat2a	75	1.24431e-17	1.04406e-15	0.482955	0.151316
Tcim	75	2.13855e-17	1.75361e-15	0.233249	0.554409
Hspa5	76	1.51803e-17	1.26393e-15	0.450135	0.224797
Hspa4l	76	4.29249e-17	3.41632e-15	0.112394	0.434332
Nfat5	77	2.37995e-17	1.93688e-15	0.445102	0.272793
Abl2	77	8.40594e-17	6.499e-15	0.0654928	0.406433
Klf9	78	9.97017e-17	7.5998e-15	0.19363	0.379855
Tiparp	79	2.62625e-17	2.12139e-15	0.512077	0.497296
Flt1	80	2.87503e-17	2.30514e-15	0.412634	0.348125
Oser1	80	1.95246e-15	1.39036e-13	0.249469	0.457442
Ctsl	81	4.41415e-17	3.4875e-15	0.57592	0.353509
Ggct	81	3.36945e-15	2.32299e-13	-0.236189	0.423809
Vcam1	82	4.77776e-17	3.74742e-15	0.496773	0.0173825
Mafk	82	3.79962e-15	2.60298e-13	0.161939	0.282067
Sat1	83	7.09298e-17	5.52334e-15	0.539022	0.417684
Gprc5a	83	7.45996e-15	4.89373e-13	0.0728354	0.283763
Ace	84	8.95169e-17	6.87185e-15	0.241407	0.0619003
Plaur	84	9.07005e-15	5.8437e-13	0.291577	0.453825
Ppp1r15a	85	9.26124e-15	5.93158e-13	0.0734918	0.344024
Sgms2	86	1.12651e-16	8.52678e-15	0.44284	0.373979
Uqcrh	87	3.98737e-16	2.99717e-14	0.398246	0.140804
Txnrd1	87	6.77471e-15	4.52651e-13	0.41715	0.435583
Alcam	88	5.51925e-16	4.12002e-14	0.418968	0.147816
Pold4	88	1.37014e-14	8.62233e-13	-0.0170924	0.417131
P4ha1	89	7.73815e-16	5.73683e-14	0.398566	0.309883
Rcan1	89	3.08849e-14	1.93236e-12	0.150199	0.359005
Plk2	90	9.53591e-16	7.02155e-14	0.429224	0.192156
Slc20a1	90	1.08789e-14	6.88618e-13	0.388188	0.412456
Ehd1	91	1.06311e-15	7.7751e-14	0.436576	0.0375181
Trib1	91	6.12025e-14	3.65998e-12	0.363477	0.486726
H2-K1	92	1.18828e-15	8.63218e-14	0.347113	0.0961717
S100a4	92	6.26236e-14	3.72438e-12	0.269368	0.713959
Ezr	93	7.11698e-14	4.18664e-12	0.313053	0.435276
Map1lc3b	94	1.40512e-15	1.01394e-13	0.412347	0.0631497
Slc38a2	94	8.94737e-14	5.20679e-12	0.166578	0.414474
Bag3	95	9.28257e-14	5.37297e-12	0.173845	0.3652
Maged1	96	1.58762e-15	1.13804e-13	0.433849	-0.140317
Cyth2	96	1.08792e-13	6.26367e-12	0.139775	0.407207
Lamc2	97	2.00247e-15	1.41665e-13	0.466805	0.206094
Brd2	97	1.10569e-13	6.33229e-12	0.0401805	0.426766
Thbs1	98	2.34024e-15	1.63792e-13	0.312426	0.139014
Skil	98	1.2785e-13	7.28342e-12	0.0699304	0.345686
Rbms1	99	2.34551e-15	1.63792e-13	0.41381	0.106524
Nr4a2	99	1.374e-13	7.74591e-12	0.169551	0.257157
Krt14	100	2.62953e-15	1.82449e-13	0.719433	-0.187784
Prl2c3	100	1.53452e-13	8.60606e-12	0.32457	0.430195
Gm16685	101	4.55318e-15	3.0996e-13	0.325121	0.267971
mt-Co3	101	4.55457e-14	2.78524e-12	0.300642	0.315681
Fnip1	102	1.94187e-13	1.07789e-11	0.143732	0.308605
Use1	103	4.63569e-15	3.13604e-13	0.42508	0.152716
mt-Co2	103	2.20561e-13	1.21185e-11	0.107058	0.297323
Plat	104	5.46167e-15	3.67187e-13	0.376895	0.0210103
mt-Nd4	104	2.91058e-13	1.56737e-11	0.161683	0.302416
Procr	105	3.5676e-13	1.91167e-11	0.0786526	0.337207
Klhl24	106	7.22151e-15	4.79544e-13	0.285154	0.116511
Jund	106	5.63402e-13	2.97476e-11	-0.00548704	0.37181
Asap1	107	7.43237e-15	4.89373e-13	0.416262	0.0556034
Zfp36l1	107	6.61619e-13	3.4596e-11	0.281729	0.386588
Itgb1	108	7.62862e-15	4.97423e-13	0.373914	0.225217
Dsp	109	8.4328e-15	5.46567e-13	0.308528	0.0437261
Ubb	109	2.00457e-12	1.02347e-10	0.277755	0.322569
Flnc	110	9.34866e-15	5.95234e-13	0.377715	0.268032
Itga2	110	2.1343e-12	1.08458e-10	0.142151	0.329004
Ptpn22	111	2.24678e-12	1.13641e-10	-0.0347245	0.196879
Ergic3	113	3.57096e-14	2.22138e-12	0.378414	0.042599
Epha2	113	4.06991e-12	2.01154e-10	0.0176111	0.322703
Med13l	114	3.74652e-14	2.31728e-12	0.369048	0.199775
Rabac1	115	4.21039e-14	2.58939e-12	0.390739	0.0524355
Hsp90ab1	115	7.41064e-12	3.59699e-10	0.139312	0.259607
Ets1	116	2.5532e-12	1.28539e-10	0.413098	0.434385
Bnip3l	117	5.00583e-14	3.04399e-12	0.410343	0.166741
Stx11	118	5.22523e-14	3.15966e-12	0.264467	0.250633
Pla2g7	119	5.30284e-14	3.18878e-12	0.265969	0.122334
Apbb2	120	6.35651e-14	3.75972e-12	0.378181	0.34996
Flrt3	120	1.3139e-11	6.18331e-10	0.202576	0.242066
Man1a	122	7.37394e-14	4.31435e-12	0.387773	0.257437
Cystm1	122	2.09382e-11	9.64405e-10	0.155002	0.39655
Dusp10	123	2.15142e-11	9.86735e-10	0.128138	0.230567
Las1l	124	1.36073e-13	7.71128e-12	0.44678	0.20648
Arid4b	125	1.62081e-13	9.04314e-12	0.370784	0.264174
Fxyd5	125	2.70429e-11	1.22988e-09	-0.068338	0.41385
mt-Co1	126	4.24107e-11	1.89692e-09	0.20254	0.301345
Dnajb9	127	1.99041e-13	1.0992e-11	0.28811	0.260771
Baiap2	127	4.7347e-11	2.10034e-09	0.196179	0.386931
Anxa2	128	2.65446e-13	1.4511e-11	0.352175	0.276602
Arl5b	128	5.45095e-11	2.40821e-09	0.177487	0.27493
Basp1	129	2.70266e-13	1.47003e-11	0.429402	0.0375121
Atf4	129	7.61208e-11	3.33576e-09	-0.244946	0.39906
Fas	130	2.79099e-13	1.51049e-11	0.305865	-0.0446771
Cxcl5	131	3.76858e-13	2.00942e-11	0.456335	-0.100046
Ythdc1	131	7.66072e-11	3.34353e-09	0.109397	0.364573
Map4k4	132	5.11048e-13	2.71156e-11	0.388542	0.344247
Rnf19b	132	7.73327e-11	3.36164e-09	0.203229	0.398735
Notum	133	6.18057e-13	3.2475e-11	0.225026	0.0170365
Dedd2	133	8.28045e-11	3.57082e-09	0.0580108	0.202463
Dst	134	9.62794e-13	5.01023e-11	0.371432	0.144825
Rel	134	1.09818e-10	4.64326e-09	0.0727513	0.215076
Igfbp7	135	1.16325e-12	6.02441e-11	0.609934	-0.0123397
mt-Atp6	135	1.12261e-10	4.72805e-09	0.0199523	0.260649
Tmem176b	136	1.24442e-12	6.41412e-11	0.458196	-0.274303
Rap2b	136	1.32088e-10	5.51266e-09	0.15832	0.337229
Ltbp2	137	1.26403e-12	6.48427e-11	0.296609	0.0362766
Clk1	137	1.32611e-10	5.51266e-09	0.18312	0.323677
Rsrp1	138	1.39664e-10	5.76994e-09	0.307997	0.389416
Lypd3	139	2.57335e-12	1.28953e-10	0.32782	0.212845
Slc4a7	140	3.98712e-12	1.98878e-10	0.31081	0.1316
Tnfaip3	140	1.80947e-10	7.44704e-09	0.256821	0.273354
Lama3	141	2.46e-10	1.00101e-08	0.149387	0.277692
Bnip3	142	4.04928e-12	2.01052e-10	0.260241	0.168775
Malt1	142	2.57857e-10	1.04533e-08	0.178542	0.233073
Fam162a	143	5.10407e-12	2.5112e-10	0.461586	0.338447
Ppl	144	5.49575e-12	2.69168e-10	0.237937	-0.0310623
Tsc22d1	144	3.05517e-10	1.23393e-08	0.0999856	0.408907
Rps9	145	6.85995e-12	3.34469e-10	0.242116	-0.0377105
Klf3	145	3.14783e-10	1.26662e-08	0.13544	0.355613
Mmp3	146	7.9622e-12	3.84745e-10	0.483306	0.310891
Dynll1	146	3.76095e-10	1.50216e-08	-0.129135	0.293476
Crip1	147	8.26658e-12	3.97678e-10	0.412828	0.250908
Dynap	147	4.13353e-10	1.63888e-08	-0.16223	0.20596
Srsf5	148	8.74344e-12	4.18756e-10	0.367115	0.107128
Tsc22d2	148	4.22994e-10	1.67098e-08	0.0820486	0.288927
Ece1	149	9.41836e-12	4.49094e-10	0.253337	0.135228
Krt16	149	7.86571e-10	2.98732e-08	0.279921	0.371883
Eif4a2	151	1.11897e-11	5.31217e-10	0.373908	0.159317
Fbxo30	151	8.27167e-10	3.1196e-08	0.184516	0.249814
mt-Cytb	152	8.67207e-10	3.24797e-08	0.0378568	0.247815
Ubxn4	153	1.16139e-11	5.48949e-10	0.340943	0.229118
Ell2	153	6.1247e-10	2.38467e-08	0.302197	0.311432
Ero1l	155	1.63459e-11	7.65922e-10	0.344097	0.249829
Dusp1	155	1.82567e-09	6.63122e-08	0.195457	0.288961
Fndc3a	156	1.72113e-11	8.02996e-10	0.354144	0.0218178
Ugdh	156	2.36498e-09	8.42056e-08	0.013318	0.257887
Sdc1	157	1.77702e-11	8.25514e-10	0.400602	0.0770796
Tmcc3	157	2.44098e-09	8.66269e-08	-0.24677	0.246586
Ltbp1	158	2.04921e-11	9.4789e-10	0.316541	0.192638
Rela	158	2.496e-09	8.82899e-08	0.144121	0.309143
Tmsb4x	159	2.36702e-11	1.08104e-09	0.494108	-0.247656
Col7a1	159	3.16699e-09	1.10579e-07	0.12545	0.270224
Selenok	160	2.81196e-11	1.2735e-09	0.34053	0.284127
Rbm39	160	3.2023e-09	1.11452e-07	0.225861	0.276276
Ddx17	161	2.86986e-11	1.29431e-09	0.33042	0.0181262
Sphk1	162	3.25105e-11	1.46014e-09	0.245618	0.113738
Prdx5	162	3.68156e-09	1.26105e-07	0.248476	0.398987
Osmr	163	4.35457e-11	1.93966e-09	0.273741	-0.0467409
Vps37b	163	4.23956e-09	1.44117e-07	0.105452	0.202676
Egr1	164	4.24736e-09	1.44117e-07	-0.00597018	0.342457
Cd63	165	7.60792e-11	3.33576e-09	0.285816	0.217985
Nfkbiz	165	4.7599e-09	1.60004e-07	0.287827	0.303874
Sertad2	166	5.25679e-09	1.74538e-07	0.210374	0.290978
Zfp263	167	8.13829e-11	3.52355e-09	0.242222	0.133576
Mmp13	168	8.37566e-11	3.59754e-09	0.387055	0.226633
Ywhag	168	6.34047e-09	2.09875e-07	0.284592	0.331678
Mxd4	169	8.77314e-11	3.75338e-09	0.22064	-0.0487809
Nupr1	169	6.76712e-09	2.22636e-07	0.116655	0.461999
Sdc4	170	8.95619e-11	3.8166e-09	0.351596	-0.0668133
Msn	170	3.44651e-09	1.18806e-07	0.298169	0.300782
Wls	171	1.05473e-10	4.47702e-09	0.310691	0.185403
Cstb	171	6.94656e-09	2.272e-07	0.170797	0.29804
Gnl3	172	1.19243e-10	5.00268e-09	0.335974	0.20697
Tnc	173	1.32927e-10	5.51266e-09	0.3173	0.109342
Chka	173	9.43137e-09	3.02923e-07	0.288485	0.342152
Timp2	174	1.82556e-10	7.4848e-09	0.35436	0.200337
S100a11	174	1.00912e-08	3.20615e-07	0.231414	0.288069
Arhgap42	175	2.27916e-10	9.30929e-09	0.228798	0.0162955
Zbtb7a	175	1.21279e-08	3.83837e-07	0.216204	0.318969
App	176	3.61089e-10	1.44756e-08	0.315691	0.0961047
Stx3	176	1.73966e-08	5.44221e-07	0.0954804	0.310897
Gja1	177	3.78441e-10	1.50597e-08	0.331374	0.0652299
Lmna	177	1.75601e-08	5.47753e-07	-0.0326024	0.25674
Elovl7	178	4.42001e-10	1.73972e-08	0.271279	0.0424567
mt-Nd2	178	2.01888e-08	6.22576e-07	0.109263	0.254958
Fam117b	179	5.24189e-10	2.05573e-08	0.162815	0.061695
Bcl10	179	2.17762e-08	6.66336e-07	0.113404	0.306419
Eif5b	180	5.45446e-10	2.13138e-08	0.301501	-0.00234006
Sfr1	181	1.15238e-09	4.2717e-08	0.280894	0.263854
Ctnna1	182	6.80381e-10	2.63958e-08	0.3062	0.0933918
Rnf24	182	2.99948e-08	9.09422e-07	0.151297	0.201751
Rpl36a	183	7.19216e-10	2.78029e-08	0.252157	0.0682795
Cyth3	183	3.07437e-08	9.29524e-07	0.192822	0.245984
Dlgap4	184	7.22617e-10	2.78349e-08	0.261383	0.0521241
Nipal1	184	3.50753e-08	1.0546e-06	0.0311559	0.163847
Tmem176a	185	7.33323e-10	2.80703e-08	0.359224	-0.29514
Coq10b	185	5.83152e-08	1.71058e-06	0.0878714	0.273322
Pgk1	186	7.33915e-10	2.80703e-08	0.43717	0.254048
Srsf11	186	6.98527e-08	2.04347e-06	0.0725213	0.296132
Ibsp	187	7.55469e-10	2.87929e-08	0.183343	0.0575565
Gfod1	188	7.40633e-08	2.16081e-06	0.0153063	0.140371
Clic4	189	8.61954e-08	2.50801e-06	0.225396	0.318588
Pde4b	190	8.02625e-10	3.03763e-08	0.22257	-0.147189
Ank	190	8.79753e-08	2.55293e-06	0.123924	0.270188
Atp6ap1	191	8.30145e-10	3.11996e-08	0.257403	0.0962053
Zfp703	191	9.6233e-08	2.77767e-06	0.119813	0.205856
Smim14	192	9.72202e-10	3.62866e-08	0.306952	0.137145
Serpine1	192	1.06571e-07	3.05974e-06	0.0605802	0.250425
Mafg	193	1.11582e-07	3.18672e-06	0.0345259	0.30432
Mdm2	194	1.22404e-07	3.46834e-06	0.0474367	0.234037
Aldoc	195	1.08493e-09	4.03551e-08	0.259996	0.0232728
Stn1	195	1.32772e-07	3.74252e-06	0.0655279	0.219199
Sertad1	196	1.39613e-07	3.91495e-06	-0.171156	0.223456
Igf2r	197	1.48855e-09	5.49414e-08	0.252868	0.0405924
Ccl2	198	1.49231e-09	5.49414e-08	0.582314	0.241542
Gclm	198	1.48777e-07	4.13976e-06	0.000420881	0.266444
Tuba4a	199	2.0576e-07	5.66705e-06	-0.027672	0.288733
Tslp	200	1.61827e-09	5.93768e-08	0.588815	-0.113274
Tmem40	200	2.06419e-07	5.67076e-06	-0.0214522	0.189108
Tnip3	201	1.65002e-09	6.03374e-08	0.263682	-0.089349
Elf1	201	2.45248e-07	6.65305e-06	0.175942	0.271681
Perp	202	1.70302e-09	6.20655e-08	0.334449	-0.034804
Ypel5	202	2.51999e-07	6.80209e-06	0.0231722	0.201868
Tcp11l2	203	1.89609e-09	6.86398e-08	0.13637	0.0433505
Krt19	204	1.92511e-09	6.94581e-08	0.375002	0.0300605
Gpi1	205	2.0818e-09	7.48618e-08	0.330544	0.16116
Lif	205	2.68631e-07	7.21505e-06	0.225992	0.265397
Krt8	206	2.25132e-09	8.06898e-08	0.308849	0.277468
Irs2	206	3.07362e-07	8.17418e-06	0.0489072	0.145694
Tax1bp1	207	2.34224e-09	8.36713e-08	0.321601	0.0319248
Taf7	207	3.11805e-07	8.272e-06	0.189932	0.237739
Ogt	208	2.7938e-09	9.8502e-08	0.277983	-0.113195
mt-Nd1	208	3.20551e-07	8.44195e-06	0.118149	0.200461
Nrp2	209	2.91089e-09	1.02297e-07	0.346725	0.18559
Vegfa	209	5.02894e-09	1.68524e-07	0.261244	0.237253
Rpl24	210	3.05358e-09	1.06964e-07	0.208322	0.0258638
Mxd1	210	3.43596e-07	9.00505e-06	0.117049	0.134762
Cd81	211	3.2823e-09	1.13666e-07	0.334107	0.0165925
Ets2	211	3.53137e-07	9.23274e-06	0.223117	0.260623
Plod2	212	3.28691e-09	1.13666e-07	0.21824	0.138379
Gem	212	3.58398e-07	9.3477e-06	-0.0101272	0.138483
Egln3	213	3.63386e-09	1.24866e-07	0.28463	0.0529696
Enpp2	214	3.81342e-09	1.3021e-07	0.144488	0.0850312
Myo10	214	3.01191e-07	8.0496e-06	0.223888	0.24597
Glmp	215	4.3183e-09	1.46066e-07	0.269334	0.143431
Mef2a	215	3.79297e-07	9.84535e-06	0.127578	0.222479
Itgb4	216	4.52849e-09	1.52699e-07	0.260371	0.064779
Iqgap1	217	2.64406e-07	7.11923e-06	0.257644	0.279735
Pttg1ip	218	4.20257e-07	1.08565e-05	0.226412	0.28372
mt-Nd5	219	4.22942e-07	1.08998e-05	0.211275	0.28231
Kcmf1	220	4.49553e-07	1.15581e-05	0.108947	0.266733
Rps28	221	5.15301e-09	1.72149e-07	0.246395	0.0908943
5031425E22Rik	221	4.55293e-07	1.16503e-05	0.093975	0.198958
Zfp622	222	5.25063e-09	1.74538e-07	0.288609	0.216595
Phtf2	222	5.22162e-07	1.32673e-05	0.0488295	0.106901
Tacstd2	223	6.55881e-09	2.16441e-07	0.270173	-0.0354428
Plod1	223	5.25979e-07	1.3333e-05	0.118288	0.125651
Ctsb	224	6.94781e-09	2.272e-07	0.33004	0.169183
P4ha2	225	7.51252e-09	2.44926e-07	0.133073	0.0422128
Atp6v0e	226	7.64609e-09	2.48532e-07	0.267161	0.128758
Pmepa1	226	6.97091e-07	1.75065e-05	0.067448	0.273238
Acsl3	227	7.82566e-09	2.53607e-07	0.27397	0.182929
Wsb1	227	7.32032e-07	1.83415e-05	0.107778	0.239661
Rtn4	228	7.90287e-09	2.55345e-07	0.256808	0.143832
Sesn3	229	9.2744e-09	2.98768e-07	0.263902	-0.033543
Pcolce2	229	8.50725e-07	2.12662e-05	-0.0288491	0.260444
Gch1	230	9.97685e-09	3.18999e-07	0.18909	0.121168
Cebpd	231	9.99083e-09	3.18999e-07	0.320708	-0.60376
1810013L24Rik	231	9.02494e-07	2.24625e-05	0.0351674	0.178384
Acsl4	232	1.01007e-08	3.20615e-07	0.252409	-0.025163
Prl2c2	232	9.72952e-07	2.40989e-05	0.106289	0.139724
Cdh1	233	1.25799e-08	3.96982e-07	0.301725	0.191787
Abcc1	233	5.06738e-08	1.49453e-06	0.225487	0.214468
Aldh2	234	1.31327e-08	4.13223e-07	0.308264	-0.00117786
Mrps6	234	9.92912e-07	2.44813e-05	0.0373131	0.259724
Arl8b	236	1.47024e-08	4.61271e-07	0.217524	0.102344
St3gal1	236	1.16225e-06	2.82066e-05	0.200133	0.240413
Slc5a3	237	1.17413e-06	2.84313e-05	0.101116	0.165736
Mmp14	238	1.81099e-08	5.6328e-07	0.277821	-0.00647907
Ipo7	238	1.23666e-06	2.96799e-05	0.00764759	0.226376
Itpr2	239	1.85188e-08	5.74349e-07	0.15556	0.0463995
Mmp12	239	2.22167e-07	6.04206e-06	0.161697	0.154538
Fam213a	240	2.0133e-08	6.22576e-07	0.295808	0.165504
Frmd4b	240	1.25038e-06	2.98766e-05	0.0305834	0.170382
Sox4	241	2.08687e-08	6.41712e-07	0.388769	-0.0176793
Rai14	241	1.31347e-06	3.13149e-05	0.187228	0.260474
Prdx1	242	2.17926e-08	6.66336e-07	0.253703	0.080942
Ndel1	242	1.40744e-06	3.34083e-05	0.115652	0.24052
Hipk1	243	1.48084e-06	3.49207e-05	0.0197487	0.207017
Suco	244	1.63717e-06	3.85234e-05	0.0413606	0.201717
Samd4	245	2.72127e-08	8.29719e-07	0.178079	0.0840357
Ppif	245	1.97056e-06	4.51892e-05	0.00173005	0.205147
Ppp4r2	246	2.86218e-08	8.70232e-07	0.291878	0.186385
Clk4	246	2.07826e-06	4.74581e-05	0.0617306	0.198659
Eef1a1	247	3.25265e-08	9.80688e-07	0.222636	0.0199812
Lpin2	247	2.9345e-07	7.86213e-06	0.235226	0.225078
Pdlim5	248	3.65054e-08	1.09182e-06	0.243291	0.130414
Rheb	248	2.45089e-06	5.54988e-05	0.172574	0.24831
Slc6a6	249	3.65152e-08	1.09182e-06	0.251315	0.0513399
Igsf3	249	3.11089e-06	7.01505e-05	0.109228	0.181209
Nrip1	250	3.78418e-08	1.12837e-06	0.295456	0.225555
Smad7	250	3.16797e-06	7.12754e-05	0.0175079	0.218437
Fam214b	251	3.17394e-06	7.12754e-05	0.0862814	0.102283
Pcolce	252	4.27775e-08	1.27204e-06	0.316437	0.122274
Map7d1	252	3.18123e-06	7.12911e-05	0.0967905	0.247638
Msl2	253	3.36298e-06	7.50534e-05	0.0575809	0.138682
Fbxo32	254	4.89246e-08	1.45085e-06	0.169934	-0.00069724
Dusp8	254	3.48515e-06	7.74153e-05	-0.00322749	0.0753263
Npnt	255	5.01427e-08	1.48291e-06	0.267782	-0.13751
Camk2d	255	3.49285e-06	7.74153e-05	0.176556	0.273422
Mark3	256	3.90222e-06	8.56746e-05	0.0822039	0.23772
Reep3	257	5.1895e-08	1.52639e-06	0.256152	0.132298
Chchd2	257	3.94275e-06	8.62148e-05	0.0749471	0.177312
Ddit4	258	3.97305e-06	8.65278e-05	-0.0700324	0.181641
Zbtb10	259	4.33878e-06	9.3926e-05	0.0481194	0.114512
Cspg5	260	4.46908e-06	9.63612e-05	0.104141	0.111053
Krt15	261	9.43687e-08	2.73114e-06	0.163951	0.0235213
Itga5	261	4.60616e-06	9.87269e-05	-0.00396774	0.136952
Qsox1	262	9.70261e-08	2.79311e-06	0.191924	0.00568272
Trio	262	1.7951e-07	4.9821e-06	0.200913	0.190389
Atp1a1	263	1.09392e-07	3.13243e-06	0.27435	0.141185
Ctla2a	264	1.1965e-07	3.40813e-06	0.338333	-0.209386
Cdcp1	265	1.20748e-07	3.43038e-06	0.277029	0.0712182
Osgin1	265	4.94042e-06	0.000105474	0.00568676	0.101576
Cope	266	1.28555e-07	3.6331e-06	0.285932	-0.122263
Runx1	266	1.88945e-07	5.21719e-06	0.260667	0.245204
Anxa5	267	1.34586e-07	3.7838e-06	0.280763	0.0794185
Arhgap22	267	5.29545e-06	0.000112831	0.17632	0.232116
Srpk2	268	1.42503e-07	3.98567e-06	0.249751	0.213233
Cdk17	268	5.46431e-06	0.000115972	0.149657	0.169482
Tmc4	269	1.44039e-07	4.01825e-06	0.215642	-0.0350146
Rnf19a	269	5.47712e-06	0.000116016	-0.0200235	0.186874
Prnp	270	6.1022e-06	0.000127757	0.105695	0.203941
Ammecr1l	271	6.11467e-06	0.000127771	0.110943	0.166635
Pdgfc	272	1.87537e-07	5.19157e-06	0.129819	-0.0369653
Kdm5b	274	2.08649e-07	5.71752e-06	0.216163	-0.0639829
Sparc	275	2.09544e-07	5.72754e-06	0.301769	0.0907694
Myc	275	7.06146e-06	0.00014727	0.122541	0.249386
Abtb2	276	2.15606e-07	5.87839e-06	0.155854	0.134584
Pcf11	277	7.4855e-06	0.000155217	0.0590321	0.173008
Crebbp	278	2.49233e-07	6.74425e-06	0.221543	0.141949
Dot1l	278	8.04749e-06	0.000165601	-0.0196775	0.186118
Map2k3	279	8.25653e-06	0.000169166	-0.11789	0.259295
Pdia3	280	3.05171e-07	8.13588e-06	0.269636	0.0330266
Rgcc	280	8.26463e-06	0.000169166	-0.0301794	0.153766
Gadd45g	281	8.41456e-06	0.000171848	-0.119159	0.240653
Errfi1	282	3.12679e-07	8.27492e-06	0.35015	0.262232
Ascc3	282	8.51884e-06	0.000173516	0.168161	0.199695
Tgoln1	283	3.15047e-07	8.31725e-06	0.212355	0.0990522
Tpst2	283	8.52831e-06	0.000173516	0.0942359	0.258377
Sparcl1	284	3.33783e-07	8.7691e-06	0.125593	0.0853996
Zfp655	284	9.41524e-06	0.000190844	0.143718	0.198841
Lysmd3	285	9.54024e-06	0.000193016	-0.0117366	0.143088
Odc1	286	9.66488e-06	0.000195173	-0.56096	0.332011
Rtf1	287	3.77597e-07	9.82477e-06	0.261115	0.0586381
Jak1	288	3.93406e-07	1.01872e-05	0.244779	0.184206
Hspe1	288	9.91768e-06	0.000199905	-0.269665	0.234545
Erbin	289	4.5086e-07	1.15642e-05	0.201959	0.0922956
Foxo3	289	1.05818e-05	0.000212107	0.0778258	0.116616
Wfdc2	290	5.06123e-07	1.29205e-05	0.317909	-0.173161
Mcl1	290	1.09896e-05	0.000218787	0.015496	0.21424
Tlr2	292	5.20018e-07	1.3244e-05	0.145432	0.0546709
Spint2	293	5.28052e-07	1.33543e-05	0.228277	-0.150641
Ppard	294	1.43243e-05	0.000282416	-0.0500577	0.142638
Asah1	295	5.36356e-07	1.35327e-05	0.236424	0.103769
Lncpint	295	1.43992e-05	0.000282863	0.0878221	0.170338
Nt5dc3	296	1.4853e-05	0.000290721	0.0253968	0.137101
Tubb6	297	1.54882e-05	0.000302061	-0.312819	0.258764
Rpl3	298	6.60541e-07	1.66272e-05	0.199566	-0.0342938
Fbln2	298	1.02814e-06	2.5235e-05	0.265125	0.257444
Gsn	299	1.73947e-05	0.00033742	0.196062	0.26459
Glb1	300	9.02733e-07	2.24625e-05	0.151247	0.0184888
Foxo1	300	2.00975e-05	0.000385019	0.039613	0.171645
Hs3st1	301	9.22515e-07	2.29021e-05	0.163254	-0.13972
Rc3h1	302	9.88808e-07	2.44358e-05	0.202961	0.167316
Mfhas1	302	1.02747e-05	0.000206333	0.149526	0.153858
Myo1e	303	1.01146e-06	2.48819e-05	0.219273	0.103073
Nedd9	303	2.18994e-05	0.000417322	0.0702013	0.141255
Noct	304	2.21825e-05	0.000421234	0.163086	0.23523
Lrp1	305	1.06489e-06	2.60777e-05	0.141403	0.110141
Pld3	306	1.08951e-06	2.66057e-05	0.123413	0.0590235
Rps20	306	2.32137e-05	0.000439274	-0.0389397	0.153544
Lama5	307	1.09136e-06	2.66057e-05	0.191733	-0.000877925
March7	307	2.36206e-05	0.000446194	0.130322	0.198965
2900097C17Rik	308	1.11992e-06	2.72405e-05	0.199453	0.021985
Moxd1	309	1.1791e-06	2.84879e-05	0.240104	-0.121608
Syap1	310	1.18208e-06	2.84962e-05	0.147507	0.110824
Spag9	310	2.05249e-06	4.69686e-05	0.245621	0.231417
Ccl7	311	1.21328e-06	2.91833e-05	0.167509	0.133219
2810403A07Rik	311	3.02177e-05	0.00055992	0.144792	0.172224
Hivep2	312	1.25e-06	2.98766e-05	0.203961	0.114614
Creb5	312	3.02617e-05	0.00055992	-0.0552133	0.172026
Arl6ip5	313	1.37837e-06	3.279e-05	0.255048	0.138184
Arhgef3	314	3.0965e-05	0.00057098	-0.0104153	0.11175
Pdgfa	315	1.43824e-06	3.40646e-05	0.325503	0.0432891
Siah2	316	3.32852e-05	0.000608578	-0.0891302	0.156744
Utrn	317	1.45986e-06	3.45012e-05	0.193289	0.107112
Hook3	318	1.67529e-06	3.93347e-05	0.208771	0.00606709
Taf1d	318	3.71806e-05	0.000671857	0.120472	0.233076
Slc22a23	319	1.77454e-06	4.15749e-05	0.0797183	0.0205646
Zfx	319	4.00657e-05	0.000716995	0.0433317	0.174502
Arl4a	320	4.66066e-05	0.000824297	-0.104888	0.138032
Lrrc8d	321	1.81861e-06	4.25154e-05	0.16385	-0.0528603
Nbl1	321	2.38053e-05	0.00044812	0.117041	0.117561
Tmem132a	322	1.82367e-06	4.25417e-05	0.20643	0.0893851
Enc1	322	4.8945e-05	0.000862834	0.0294832	0.0855776
Atp11a	323	1.82896e-06	4.25734e-05	0.182132	0.0120145
Il18rap	323	5.39158e-05	0.000942787	0.0100637	0.150554
Limd1	324	1.85887e-06	4.31769e-05	0.19925	0.0639004
Lamb3	324	3.76232e-05	0.000678722	0.150755	0.162044
Rps4x	325	1.87563e-06	4.34728e-05	0.186536	-0.00654817
Piezo1	325	5.7003e-05	0.000993559	0.0677799	0.18605
Prr13	326	1.89672e-06	4.38676e-05	0.257677	0.0322353
Lpp	327	1.90088e-06	4.38703e-05	0.176434	0.0288158
Tcaf1	328	1.9103e-06	4.39938e-05	0.144883	-0.0303333
Ifi207	328	6.48296e-05	0.00111383	0.0894164	0.0967342
Gspt1	329	1.95756e-06	4.49864e-05	0.247392	0.196307
Nfkbib	330	7.9765e-06	0.000164474	0.21068	0.202266
Ppp1r10	331	6.94483e-05	0.00118566	0.0958799	0.16406
Anxa7	332	3.49742e-06	7.74153e-05	0.230785	0.213933
Eif3h	333	2.10737e-06	4.80215e-05	0.212209	0.0127923
Marcksl1	334	2.30001e-06	5.2301e-05	0.268035	0.0587451
3300005D01Rik	334	8.03468e-05	0.00135252	0.0263295	0.189634
Higd1a	335	8.05913e-05	0.00135454	-0.0198473	0.221122
Rpl37a	336	2.32255e-06	5.27028e-05	0.183025	-0.00660104
Rpl22l1	336	8.5148e-05	0.00142229	0.0597446	0.264352
Gabarapl2	337	2.76929e-06	6.25779e-05	0.231616	0.0982858
Cnot4	337	8.7137e-05	0.00145103	0.0948346	0.191976
Kpna4	338	9.25536e-05	0.00153264	0.0586405	0.190142
Pvr	339	9.81495e-05	0.00161947	-0.0322976	0.153706
Gnas	341	3.35045e-06	7.49284e-05	0.203164	0.0612111
Larp1b	341	9.92581e-05	0.00163527	0.00845801	0.144133
Golgb1	342	3.43148e-06	7.64246e-05	0.220996	0.0495805
Slc7a1	343	0.000103873	0.00170352	-0.0251385	0.152164
Atp6v1e1	344	3.68024e-06	8.12959e-05	0.224278	0.0478872
Fam110a	344	0.000112076	0.00182532	-0.0598314	0.0843696
Cd82	345	0.000121706	0.00197208	-0.0504809	0.243646
Cblb	346	3.81257e-06	8.40474e-05	0.111959	0.0870345
Raph1	346	6.29738e-05	0.0010906	0.170773	0.180315
Rps24	347	3.88817e-06	8.55397e-05	0.165279	0.0464263
Plau	347	0.000126247	0.00203955	0.163338	0.206912
Tnfaip2	348	3.93843e-06	8.62148e-05	0.22946	0.168346
Ptpre	348	0.000130349	0.00209642	0.0779458	0.195249
Sqle	349	3.9614e-06	8.6448e-05	0.206039	0.0824038
Smtn	349	0.000130707	0.00209906	0.0680425	0.170317
Flnb	350	4.02327e-06	8.74455e-05	0.18355	0.0946418
Mpp5	350	0.00013448	0.00215328	0.12934	0.144876
Insr	351	4.26355e-06	9.24823e-05	0.133115	-0.0287349
Csnk1e	351	4.93149e-05	0.000867942	0.188123	0.189317
Abi1	352	4.35076e-06	9.39972e-05	0.183608	0.0464439
Cxcl16	353	4.48879e-06	9.65938e-05	0.297029	0.173387
Tle2	354	4.50099e-06	9.66641e-05	0.0565334	0.0229143
Fam193a	354	0.000148439	0.00235588	0.135294	0.154772
Gclc	355	0.000150627	0.0023871	0.114778	0.126913
Scd2	356	4.66766e-06	9.98473e-05	0.195786	0.0827306
Tiam2	356	0.000153834	0.00243435	0.0919479	0.119832
Lrrc58	357	5.42253e-06	0.000115311	0.18152	0.0259321
Prdm2	357	0.000154379	0.00243942	0.0457502	0.132554
Ahnak2	358	5.52333e-06	0.000116767	0.258174	0.119547
Klhl21	358	0.000158249	0.00249328	0.0401658	0.11634
Cul1	359	5.58913e-06	0.000117927	0.207365	0.0278713
Nptxr	359	0.000163389	0.00256307	-0.00691211	0.0681367
Apoe	361	0.000186614	0.00287327	0.0872635	0.108507
Rlim	362	5.81341e-06	0.000122421	0.168704	0.112864
Mapk1ip1l	362	0.000190613	0.00293068	0.110484	0.165602
Hbp1	363	6.03797e-06	0.000126903	0.159587	0.107629
Dusp2	363	0.000194096	0.00298	-0.0636973	0.0707599
Prkx	364	6.08599e-06	0.000127664	0.166007	0.14079
Tnfrsf23	364	0.000211632	0.00321277	0.085216	0.106519
Fam167a	365	0.000213617	0.00323383	0.058178	0.146767
Lamp1	367	8.01942e-05	0.00135206	0.201738	0.201751
Dnmt3a	368	7.32804e-06	0.000152536	0.113089	0.0219146
Gm4610	368	0.000215932	0.00326432	-0.225233	0.141764
Sdf2	369	7.403e-06	0.000153801	0.218961	-0.029024
Tnnt2	369	0.000223523	0.00336497	-0.0239045	0.23765
Arid5b	370	7.69041e-06	0.000159161	0.224488	-0.186949
Plcl1	371	0.000116008	0.00188256	0.037862	0.0373634
Ehf	372	7.97753e-06	0.000164474	0.0912852	-0.0224184
Spry2	372	0.000235647	0.00352363	0.0801611	0.108598
H2-T23	373	8.26765e-06	0.000169166	0.240712	-0.00425911
Eif5	373	0.00023569	0.00352363	-0.068971	0.183136
Ppan	374	8.60989e-06	0.000174847	0.205049	0.024469
Ube2d1	375	1.00999e-05	0.0002032	0.174499	-0.0768122
Traf1	377	0.00025518	0.0037824	0.0878748	0.188541
Cd164	378	1.06867e-05	0.000213814	0.221942	0.00794501
Msln	378	0.000255231	0.0037824	0.0756143	0.142819
Larp4	379	1.08371e-05	0.000216421	0.187314	0.155244
Dusp16	379	0.000255445	0.0037824	-0.0222941	0.0784282
Sash1	380	1.09959e-05	0.000218787	0.162646	0.10828
Ankrd33b	380	0.000257908	0.00380846	-0.15136	0.074581
Rhou	381	1.17892e-05	0.000234139	0.166449	0.11075
Sema3e	381	0.000262261	0.00386604	-0.0352263	0.0932562
Akap2	382	1.21699e-05	0.000241259	0.158443	0.126361
Wac	382	0.000263938	0.00388161	-0.0168852	0.179755
Aamp	383	1.22775e-05	0.000242947	0.212159	0.0783539
Chd1	383	0.000272204	0.00398153	0.00328013	0.194445
Zfp131	384	0.000280573	0.00408737	0.0715923	0.171522
Btg2	385	0.00028511	0.00414789	-0.0805829	0.122521
Adgrg6	386	1.37132e-05	0.000270862	0.132579	0.0592896
Wipi2	386	0.00028572	0.00415118	0.0602725	0.160149
Tra2a	387	2.38599e-05	0.000448367	0.229093	0.208908
Sod2	388	1.43943e-05	0.000282863	0.242666	-0.035662
Rnf103	388	0.000290216	0.00420521	0.0668693	0.108268
Vat1	389	1.44721e-05	0.000283779	0.195463	0.062577
5430416N02Rik	389	0.000294694	0.00425871	-0.10024	0.138329
Ppp3ca	390	1.51594e-05	0.000296184	0.195394	0.0592451
Ube2d3	390	0.000303053	0.00436783	-0.162359	0.173047
S100a13	391	1.57194e-05	0.00030602	0.204722	0.13941
Arid5a	391	0.000307014	0.00441905	-0.16015	0.12114
Nt5e	392	1.59343e-05	0.000309645	0.196062	0.127593
Ddit3	392	0.000307467	0.00441969	-0.312686	0.141501
Myh9	393	0.000308086	0.00442272	0.0447225	0.168793
Hnrnpc	394	0.000308748	0.00442612	0.0455074	0.19651
Ifitm2	396	1.77764e-05	0.000344067	0.232955	-0.143887
Micall1	396	0.000312922	0.00447433	0.058426	0.147136
Rb1cc1	397	1.78009e-05	0.000344067	0.181411	0.0929144
Dusp4	397	0.000315849	0.00451022	0.0925806	0.121938
Pptc7	398	1.80808e-05	0.000348852	0.123386	-0.0105611
Iffo2	398	0.000316679	0.00451612	0.0131004	0.105892
Wdr26	399	1.89865e-05	0.000365676	0.17728	0.105412
Clic1	399	0.000322929	0.00459315	-0.337179	0.172458
Tjp2	400	1.93067e-05	0.000371182	0.163542	0.0975314
Prrg4	400	0.000334111	0.00473403	0.109614	0.126517
Gapdh	401	0.000334146	0.00473403	0.178821	0.200674
Agrn	402	1.95845e-05	0.000375856	0.139865	-0.00359668
Plekhm2	402	0.000340391	0.0048162	0.0515354	0.0835238
Ube2b	404	2.03202e-05	0.000388596	0.208756	0.0428507
Col18a1	404	0.000352167	0.00496335	0.0307151	0.159854
Ifngr2	405	2.11802e-05	0.00040433	0.195739	-0.136132
Kctd9	405	0.00035724	0.00501527	0.0810406	0.0994787
Lhfpl2	406	2.20002e-05	0.000418506	0.160431	-0.0127456
Nabp1	406	0.000360661	0.00505673	-0.0374897	0.135853
Hexb	407	0.000168485	0.00263157	0.111776	0.110263
Ube2h	408	2.3095e-05	0.000437794	0.156675	0.120899
Hcfc1r1	409	2.38043e-05	0.00044812	0.243218	0.103409
Cdca4	409	0.000368265	0.0051283	-0.0570555	0.145376
Hspb1	410	0.000369082	0.0051283	0.133613	0.202973
Matn2	411	0.000375084	0.00520501	0.053261	0.0688989
Tns4	412	2.57789e-05	0.000482992	0.228501	0.0277996
Stk17b	412	0.000388268	0.00538107	-0.0176883	0.0910027
Ptgs1	413	2.57917e-05	0.000482992	0.120839	-0.0152677
Dmpk	413	0.000410957	0.00566649	0.0458404	0.0563705
Zdhhc20	414	2.60441e-05	0.000486876	0.175137	0.0581947
Bsg	415	2.64376e-05	0.00049338	0.217772	0.144
Igsf8	416	2.66664e-05	0.000496793	0.219247	0.15048
Gpbp1	416	0.000417655	0.00572966	0.0588223	0.184951
Wnt7b	417	2.78531e-05	0.00051801	0.206554	0.169366
Unc5b	417	0.000425159	0.00579588	0.0464934	0.122486
Ccbe1	418	2.81785e-05	0.000523163	0.169515	0.149953
Mir155hg	418	0.000430509	0.00584671	0.0110996	0.05617
Cpeb4	419	0.00021633	0.00326577	0.0823358	0.0826834
Ncs1	420	3.09243e-05	0.00057098	0.130769	0.0966374
Sptan1	421	3.16671e-05	0.000582932	0.161977	0.035152
Krt18	421	0.000440015	0.00596832	0.0560417	0.205715
Ano6	422	3.2506e-05	0.000597252	0.176279	0.142298
Dmp1	423	3.25553e-05	0.000597252	0.0882405	0.0327525
Nedd4l	423	0.000449393	0.0060879	0.0635917	0.0853141
Cdk9	424	3.26719e-05	0.000598377	0.176671	0.0933611
Slbp	424	0.000456411	0.00617525	-0.307554	0.17304
Pan3	425	0.000234009	0.00350819	0.136804	0.143636
Myh14	426	3.39525e-05	0.000619733	0.0766632	-0.0273945
Sema6a	426	0.000171465	0.00266657	0.055659	0.0529613
Man2a1	427	0.000484949	0.00648036	0.090483	0.125947
Trip12	428	3.42341e-05	0.000623821	0.186192	0.0570742
Ankrd17	429	3.43111e-05	0.000624173	0.198973	0.0890999
Atxn7	429	0.000492081	0.0065514	0.0430719	0.114952
Nfatc2	430	3.46135e-05	0.000628618	0.106337	0.0586898
Cdr2	430	0.000540109	0.00712944	0.0247215	0.100449
Cnot7	431	3.57442e-05	0.000648065	0.195963	0.00693634
Nfatc1	431	7.15618e-05	0.00121599	0.11247	0.105676
Tmem251	432	0.00054573	0.00717737	0.000328097	0.154078
Rnf11	433	3.65238e-05	0.000661093	0.206887	0.118851
Creb3l2	434	0.000580827	0.00759284	0.0953833	0.11393
Esyt2	435	3.88335e-05	0.000698448	0.18775	0.160234
Efnb2	435	0.000588406	0.00767338	0.0945412	0.110699
Eif3f	436	3.88457e-05	0.000698448	0.206197	-0.0756331
Pip5k1a	436	0.000593945	0.007727	0.0163009	0.152805
Zbtb2	437	0.000614677	0.00796798	0.0105054	0.0860841
Dcbld2	438	3.99226e-05	0.00071662	0.122243	0.0284634
Ctsa	439	4.00759e-05	0.000716995	0.129755	0.0559261
Slc6a4	439	0.000633835	0.0081967	-0.000886039	0.0665228
Zc3h12a	440	4.15021e-05	0.000741285	0.154859	0.127593
Urgcp	440	0.000635404	0.00820717	-0.0520145	0.0976883
Rpl35a	441	0.000638882	0.00824226	-0.019	0.14387
Has2	442	4.28011e-05	0.000763228	0.209653	0.0700854
Pgd	442	0.000643871	0.00828375	0.129288	0.166254
Pkd2	443	4.50181e-05	0.00080144	0.171143	0.0497418
Tcf7l2	444	4.62518e-05	0.000822052	0.137572	0.0539465
Itpkc	444	0.000653074	0.00838537	0.00767036	0.0696102
Wisp2	445	4.6481e-05	0.000824111	0.0811093	0.044184
Col5a1	446	4.65199e-05	0.000824111	0.0978082	0.0713384
Slc2a1	446	0.000664926	0.00852744	0.00971442	0.137159
Mycbp2	447	4.68133e-05	0.000826602	0.181855	0.0227273
Htra1	447	0.000677607	0.00865929	-0.205733	0.206533
Klf11	448	0.000683281	0.00871405	0.0142084	0.0677495
Igbp1	449	4.94023e-05	0.000868069	0.175208	-0.00059131
Schip1	449	0.000683502	0.00871405	0.0161026	0.0654669
Macrod1	450	5.01399e-05	0.000879602	0.0834101	-0.0273451
Timp1	450	0.000684517	0.00871671	-0.018725	0.229824
Lrrn4cl	452	5.19481e-05	0.000909849	0.0662409	0.0494769
Mkln1	453	5.41773e-05	0.000945831	0.159868	0.0516421
Ptp4a1	453	0.000732589	0.00923114	0.115612	0.182888
Mbtd1	454	5.77186e-05	0.00100441	0.150499	0.115608
Ahr	454	0.000736219	0.00925532	0.0927217	0.112136
Mif	455	0.000751942	0.00941181	-0.0523894	0.206395
Jup	456	6.07174e-05	0.0010549	0.20123	0.102982
Kdm3b	457	0.000268436	0.00393706	0.101313	0.0996407
Zmiz1	459	6.27201e-05	0.00108795	0.162047	0.141312
Eps8l2	460	6.32157e-05	0.00109216	0.142956	0.0898388
Fbxo33	460	0.000843539	0.0104468	0.062183	0.0799676
Large1	461	6.32651e-05	0.00109216	0.0810694	-0.0250392
Jun	461	0.000851348	0.0104979	0.0484252	0.274256
Cyba	462	6.41862e-05	0.00110597	0.199076	0.0378163
Lamb2	463	6.42697e-05	0.00110597	0.0777298	0.0232977
Vps37a	464	6.52561e-05	0.00111939	0.181677	-0.0449992
Notch1	464	0.000879114	0.0108008	0.029809	0.0938645
F2rl1	465	6.76474e-05	0.00115857	0.159943	0.00604878
Ing2	465	0.000880303	0.0108032	-0.140987	0.121613
Trp53inp1	466	6.90476e-05	0.00118068	0.070604	0.0251789
Pkm	466	0.00089093	0.0108965	0.174632	0.198792
Rpl21	467	7.02315e-05	0.00119714	0.140376	0.0303176
F11r	468	7.08075e-05	0.00120506	0.150694	0.100929
Setd2	468	0.000899957	0.0109861	0.129353	0.159447
Rpl39	470	7.40363e-05	0.00125457	0.16516	0.0743492
Tgfa	470	0.000939893	0.0114144	0.0821118	0.135922
Tgfbr1	471	7.40643e-05	0.00125457	0.14325	0.0214998
Il17ra	471	0.000973018	0.0117544	0.0745306	0.101045
Hipk2	472	7.42643e-05	0.001256	0.115807	0.033305
Bach1	472	0.000974176	0.0117553	0.107625	0.140403
Eaf1	473	0.000170869	0.00266262	0.125267	0.11785
Tmbim1	475	7.54023e-05	0.00127325	0.172363	0.0722752
Mapre1	476	0.00105341	0.012599	-0.0521887	0.172612
Sestd1	477	8.1009e-05	0.00135944	0.129634	0.029795
Bri3	478	8.27826e-05	0.00138706	0.195856	0.0825281
Gm6634	478	0.00107128	0.0127705	-0.0117988	0.0613261
Nob1	479	8.37366e-05	0.00140087	0.18326	-0.0176079
Acsbg1	479	0.00108618	0.0129196	-0.113976	0.102318
Tab3	480	8.64891e-05	0.00144246	0.100939	0.0506006
Parp3	480	0.00111838	0.0132589	0.000680309	0.105394
Selenon	481	8.86794e-05	0.00147445	0.0827403	0.00782875
Taf4b	481	0.00112086	0.0132593	0.0213526	0.0566647
Acpp	482	8.91757e-05	0.00148043	0.0598911	0.0254437
Stx6	483	9.26039e-05	0.00153264	0.144368	0.0407915
Brwd3	484	0.00114748	0.0135298	0.0431016	0.0671694
Rcn2	485	9.45893e-05	0.00156311	0.191672	-0.0317351
Casc1	485	0.00115026	0.0135478	0.000126898	0.0385703
Pafah1b1	486	0.00115246	0.013559	0.0068177	0.177834
N4bp2	487	0.000100708	0.00165663	0.0972064	0.0489361
Mob3c	487	0.0011664	0.013708	0.0590473	0.0835601
Lrig1	488	0.000101049	0.00165972	0.114594	0.0833386
Abcb1b	488	0.001181	0.0138495	-0.113283	0.0915938
Ranbp2	489	0.000104333	0.00170847	0.172914	0.132151
Frmd6	489	0.00059121	0.00770068	0.123263	0.129009
Ovol1	490	0.000108272	0.00177029	0.089624	0.0611216
Ivns1abp	490	0.00121581	0.0141963	0.135666	0.158465
Gsdme	491	0.000111815	0.00182532	0.102335	0.0408064
Ocln	492	0.000112143	0.00182532	0.0945266	0.0466871
Hyal1	492	0.00124129	0.014447	-0.00535587	0.0587403
Bbx	493	0.00011491	0.00186754	0.174656	0.0311023
Mapk6	493	0.00127639	0.0148097	0.0972572	0.148102
Notch2	494	0.000125545	0.00203124	0.0880426	0.00664564
Ahsa1	494	0.00127655	0.0148097	0.0895179	0.162546
Adam10	495	0.000127663	0.00205935	0.152679	-0.051019
Hnrnpdl	495	0.00128334	0.0148724	-0.106384	0.183
Anxa4	496	0.000129517	0.00208615	0.18335	0.0460412
Stk40	496	0.0012884	0.0149151	0.0790486	0.105597
Bmp1	497	0.000131269	0.00210498	0.195369	-0.110457
Sec62	497	0.00102393	0.0122837	0.157352	0.176516
Senp6	498	0.000140108	0.00224007	0.191525	0.0716355
Cpe	500	0.000140821	0.00224815	0.197638	0.0673721
Rab35	500	0.000676169	0.00865112	0.137502	0.149666
Son	501	0.000142491	0.00227146	0.190851	0.0649703
Ppm1a	501	0.00137145	0.0157586	0.0583471	0.14997
Kdm2a	502	0.000147304	0.00234473	0.152192	0.0817388
Tuba1c	502	0.00145664	0.0166491	0.0673004	0.184206
Col16a1	503	0.000147976	0.00235198	0.0949047	0.0305386
Grasp	503	0.00147752	0.0168521	0.0306494	0.0784983
Snhg12	504	0.00153514	0.0174542	-0.134108	0.166103
Zfp469	505	0.00156962	0.0178275	0.0474343	0.0564297
Tes	506	0.000156541	0.00246997	0.191996	0.131172
Smyd4	506	0.00160341	0.0181731	-0.0289549	0.0546095
Igf1r	507	0.000160756	0.0025291	0.147099	-0.0317824
Nr4a1	507	0.0016815	0.0190183	-0.00239233	0.0679825
Chd6	508	0.000161509	0.00253726	0.125024	0.0247167
H2-Aa	509	0.000164793	0.00258136	0.263776	-0.254003
Id2	509	0.00170622	0.0192476	0.0270646	0.0957068
Mllt3	510	0.000166475	0.00260393	0.138053	0.0515029
Hivep1	510	0.0017071	0.0192476	0.095356	0.10901
Ptp4a2	511	0.000252558	0.00375617	0.183563	0.170083
Kcnk5	512	0.00173917	0.0194945	-0.0224397	0.0718784
Sema4b	513	0.00175458	0.0196397	0.00479617	0.0997781
Eif3a	514	0.000170965	0.00266262	0.181153	0.0319879
Azin1	515	0.00176446	0.0197095	0.0956218	0.164793
Lrp6	516	0.000173404	0.00269287	0.131983	0.0588279
Tmem50a	517	0.00017382	0.00269545	0.187572	0.0561971
Vgll4	517	0.00181441	0.0202197	-0.0167642	0.122089
Itgav	518	0.00181573	0.0202197	0.0924443	0.134177
Serpinb6a	519	0.000177014	0.00274106	0.208002	0.169874
Zdhhc18	519	0.00182309	0.0202599	0.0443809	0.0968642
Serinc1	520	0.000180626	0.00279299	0.174776	-0.0157882
Slc3a2	520	0.00183019	0.0203179	-0.291035	0.183669
Rpl10-ps3	521	0.000183554	0.00283422	0.196359	-0.0713673
Cnksr3	521	0.00185194	0.0205173	0.0231681	0.0348942
Slc41a2	522	0.000185288	0.00285693	0.0652045	0.0414489
Brd1	522	0.00188375	0.020803	0.0910027	0.111498
Rasa2	523	0.000365112	0.0051059	0.160941	0.153138
Trip11	524	0.00019685	0.00301568	0.170153	-0.0989818
Svil	525	0.000196977	0.00301568	0.151096	-0.0195773
Ccser2	525	0.00196573	0.0215792	0.0848081	0.124512
Fgfr1	526	0.000197482	0.00301913	0.0641262	0.0284946
Ghitm	526	0.00197144	0.02162	-0.108587	0.144974
Col12a1	527	0.000198793	0.00303489	0.0658094	0.04478
2510039O18Rik	528	0.000200149	0.00305129	0.127468	0.0123653
Cd74	529	0.000207769	0.00316299	0.219298	-0.0181253
Bcar3	529	0.00207265	0.0225591	0.017255	0.11869
Cd47	530	0.000210859	0.00320553	0.195465	-0.00323238
Afap1l2	530	0.00213174	0.0231434	0.0306104	0.0510302
Rnh1	531	0.000211997	0.00321381	0.202477	0.164651
Txn1	531	0.00219037	0.0236438	-0.254947	0.136633
Sult2b1	532	0.00219094	0.0236438	-0.00390437	0.131242
Pdcd10	533	0.0010974	0.0130387	0.15406	0.167247
Mir17hg	534	0.000900287	0.0109861	0.0560392	0.0554935
Hspb11	535	0.0022302	0.0240435	-0.101489	0.155707
Ftl1-ps1	536	0.00022162	0.00334096	0.152091	0.125463
Cox7a2l	536	0.00225219	0.0242323	0.135611	0.171689
Tshz1	537	0.00225456	0.0242338	0.0340393	0.0982408
Arf4	538	0.000228111	0.00342625	0.193834	0.0993919
Rangap1	538	0.00226678	0.0243409	-0.138189	0.115221
Uap1	539	0.000228226	0.00342625	0.166679	0.0278953
Grina	540	0.000241446	0.00360471	0.151353	0.0590867
Egr3	540	0.00232362	0.0248527	0.0416642	0.0560573
Gls	541	0.00235059	0.0250729	0.102644	0.134949
Mt1	542	0.000251521	0.00374995	0.248185	0.16514
Morf4l2	542	0.0013058	0.0150682	0.155063	0.171984
Sdc2	544	0.000252632	0.00375617	0.163393	-0.00515675
Rapgef3	544	0.00240615	0.0255172	-0.00446915	0.0745102
Ern1	545	0.000256231	0.00378886	0.074931	0.0353674
Upp1	545	0.00241561	0.025579	-0.469697	0.135489
Gaa	546	0.000262522	0.00386604	0.0975849	0.0490533
Bcar1	546	0.00122263	0.0142451	0.129138	0.13386
Dmtf1	547	0.00026458	0.00388578	0.133734	0.11052
Rcor1	547	0.00246624	0.0259675	0.0837001	0.10975
Rnf4	549	0.000269963	0.00395409	0.177614	0.107719
Dnaja4	549	0.00250264	0.0263252	-0.0235892	0.0730778
Tnks2	550	0.000274253	0.00400609	0.178844	0.00846362
Palld	551	0.000278157	0.00405765	0.166089	0.111601
Me1	551	0.002563	0.0268038	0.0452744	0.100574
Exoc6b	552	0.000287046	0.00416486	0.10514	-0.00779445
Csf1	552	0.00256737	0.0268236	0.0373213	0.13729
Nfe2l2	553	0.000291808	0.00422263	0.150882	0.00584258
Rpl34	553	0.0025952	0.0270425	-0.065084	0.112525
Dgkh	554	0.000297199	0.00428918	0.112015	0.0406438
Ift140	554	0.00260347	0.0270556	0.0116867	0.0286034
Lgmn	555	0.00260458	0.0270556	0.039814	0.10573
Gm15728	556	0.00261151	0.0271016	0.0301624	0.0380828
Atg13	557	0.000309141	0.00442612	0.0721847	0.0248934
Zfp954	557	0.00262766	0.0272177	0.0342211	0.0539217
Itgb5	558	0.000317148	0.00451686	0.116421	-0.0721881
Pxdc1	558	0.00262773	0.0272177	0.0543568	0.100884
Rps3a1	559	0.00263381	0.0272547	-0.0707734	0.104635
Zfat	560	0.00264338	0.0273014	0.0368038	0.048425
Ifngr1	561	0.00032824	0.00466256	0.131063	-0.0306582
Sesn2	562	0.00271954	0.0279017	-0.0363461	0.042197
Dad1	563	0.000341446	0.00482482	0.178998	-0.0168052
Spef1	563	0.00274246	0.0281102	0.0189245	0.030536
Dirc2	564	0.000344913	0.00486746	0.0783358	0.0145681
Zc3h15	564	0.0027559	0.0282212	0.133728	0.1654
BC005537	565	0.00276853	0.0282747	0.115687	0.137048
Ifi202b	566	0.000352992	0.0049685	0.209516	0.0462437
Cdv3	566	0.00277802	0.0283406	-0.149403	0.168144
Pum1	567	0.000354181	0.00497877	0.156619	0.104226
Kif2a	567	0.00279247	0.0284611	0.0739619	0.144105
Ripk4	568	0.00282987	0.0287341	0.0450369	0.0761831
Phldb1	569	0.0024617	0.0259449	0.089721	0.099868
Usp33	570	0.000362501	0.00507596	0.109022	0.0581304
Foxa1	570	0.00287636	0.0291787	0.0142791	0.0326474
Ppp1r2	571	0.00290048	0.0293959	-0.00214535	0.163155
Mcur1	572	0.000365877	0.00511	0.0968354	0.0298018
Mfsd13a	572	0.00290396	0.0294036	0.0124528	0.0295601
Slc22a18	573	0.000368226	0.0051283	0.0442712	0.0238082
Serpinc1	573	0.00298975	0.0301595	0.0226829	0.0292085
Rps27	574	0.000369036	0.0051283	0.130394	0.106323
Fam46c	574	0.00302111	0.0303908	0.0101264	0.0268362
Sec11c	575	0.00316345	0.0317637	-0.874159	0.174573
Rbm38	576	0.00317676	0.0318382	-0.0393844	0.0599483
Ccdc50	577	0.000390507	0.00540518	0.143539	-0.0607053
Csgalnact1	577	0.00324471	0.0324292	-0.0185043	0.0415209
Ptprf	578	0.00039709	0.00548928	0.122829	-0.00292136
Ppp2ca	578	0.00324882	0.0324399	0.0964848	0.158573
Naca	579	0.000402441	0.00555614	0.131549	0.0221538
Slk	579	0.00326388	0.0325306	0.123613	0.144721
Itm2c	580	0.000411868	0.00567183	0.165232	-0.0299152
Ifi205	580	0.00333727	0.033201	0.0675837	0.0823036
Arih1	581	0.000413826	0.00569156	0.147421	0.0980051
Mgat4b	581	0.00335401	0.0333368	0.0546142	0.148798
Hagh	582	0.000415777	0.00571112	0.168025	0.103892
Batf3	582	0.00338333	0.0335974	-0.119108	0.0521384
Tm7sf3	583	0.00041927	0.00574444	0.086622	0.0184263
Stam	583	0.00344427	0.0341399	0.0613364	0.101826
Gm14137	584	0.000419794	0.00574444	0.067223	0.0551951
Inpp4b	584	0.00349305	0.0345285	-0.0303914	0.0486086
Sf3b1	585	0.000420414	0.00574566	0.17936	0.0366351
Gm26825	585	0.00350356	0.0346008	0.0136536	0.114958
Papss1	586	0.000421782	0.00575708	0.126686	-0.00864848
Cast	586	0.000798078	0.00994062	0.166831	0.156586
Eif3m	587	0.000427795	0.00581912	0.189324	-0.00490209
Ghr	587	0.0017606	0.0196867	0.0947708	0.0969329
Prkcd	588	0.00042794	0.00581912	0.117072	0.0233482
Ube2f	589	0.000458097	0.00619031	0.171021	0.150604
Vegfc	590	0.000459866	0.00620647	0.0874725	0.0749781
Tfip11	590	0.00187444	0.0207242	0.0801158	0.0834354
Rab14	591	0.000466151	0.00627617	0.183837	-0.0230606
Scin	591	0.00380886	0.0370943	-0.00447404	0.0454076
Uso1	592	0.00046619	0.00627617	0.138151	0.0732064
Arhgef39	592	0.00383658	0.0372775	-0.0174404	0.0253213
Yme1l1	593	0.00047344	0.00636392	0.126186	0.0403071
Ssh2	593	0.00410994	0.0395782	0.00583172	0.0729495
Sept11	594	0.000473884	0.00636392	0.186845	0.031885
Ahctf1	594	0.00412627	0.0397002	0.079893	0.13226
Anxa8	595	0.000475266	0.00637457	0.121458	0.0502392
Dclk1	595	0.0041307	0.0397038	0.0651484	0.0762389
Gpd2	596	0.000483226	0.00647332	0.132219	-0.00701641
Cttnbp2nl	596	0.0041354	0.0397038	-0.187066	0.140377
Atl2	597	0.000484371	0.00648036	0.0976581	0.0759286
Col4a3bp	598	0.000486544	0.00649365	0.150027	-0.00924504
Zc3hav1	598	0.00428366	0.0408154	0.0576467	0.113684
Hspa9	599	0.00433697	0.041287	-0.175689	0.156186
Rgs11	600	0.00048933	0.00652279	0.044214	0.0203824
Cst6	600	0.00437371	0.0416002	-0.024839	0.030403
Ssbp2	601	0.000494391	0.00657407	0.0858038	-0.0574865
Angptl2	601	0.00443279	0.0420881	-0.146723	0.100956
Tox4	602	0.000508763	0.00674958	0.133271	0.113107
Plekhn1	603	0.000508837	0.00674958	0.0929563	0.0621207
Phf20l1	603	0.00449898	0.0426792	0.0284938	0.145626
Slc6a2	604	0.00051227	0.0067868	0.0542293	0.0308601
Kmt2c	605	0.000518085	0.00685544	0.0988325	-0.0191439
Sar1a	606	0.000527122	0.00696651	0.174408	0.0924311
Hmga1b	606	0.00454894	0.043056	-0.210678	0.109413
Mgarp	607	0.000542807	0.00715632	0.0332539	0.0270919
Etf1	607	0.00457533	0.0432518	0.00772743	0.155316
Heca	608	0.000545616	0.00717737	0.0777538	0.0604447
Sulf2	609	0.000557938	0.00732111	0.0632261	0.0085703
Usp20	610	0.000558012	0.00732111	0.0660405	0.0326919
Col27a1	610	0.00463615	0.0437123	0.018835	0.0323369
Il6st	611	0.000567407	0.00743537	0.130433	-0.0406788
Tmprss6	612	0.000571712	0.00748272	0.106396	-0.182551
Hspd1	612	0.00488184	0.0459088	-0.0405594	0.163388
Rnf44	613	0.000582793	0.00760935	0.0915349	-0.0263823
Xrcc1	614	0.00498689	0.0467343	-0.09615	0.0547639
Atxn7l3b	615	0.000596047	0.00774504	0.179037	-0.119307
Adarb1	615	0.00252953	0.0265306	0.113387	0.119207
Eef1d	616	0.000613701	0.00796487	0.159309	0.0141164
Ptk2	617	0.00517606	0.048298	-0.0327666	0.130471
Clip1	618	0.000633732	0.0081967	0.126113	0.063863
Mapkapk2	619	0.000643059	0.00828375	0.146068	0.0480346
Tnks1bp1	620	0.000644394	0.00828375	0.100734	0.0441106
Rap1gap	620	0.00520798	0.0485539	0.0207147	0.0594764
Rpl36a-ps1	621	0.00521623	0.0485641	0.0375523	0.108743
Clcn3	622	0.000667898	0.00855542	0.148246	0.0262222
Vav3	623	0.000689067	0.00876435	0.138174	0.0750673
Adssl1	624	0.000690286	0.00876954	0.0721702	0.0506664
Il23a	625	0.000693461	0.00879955	0.165032	0.11228
2700081O15Rik	626	0.000701924	0.00889651	0.0986512	0.0327314
Ahsa2	626	0.00530094	0.0491244	0.076235	0.12489
Pnp	627	0.00530827	0.0491503	-0.0263038	0.117304
Ppp1r14c	628	0.00071873	0.00909887	0.0912792	-0.0964169
Nifk	629	0.000724934	0.00916669	0.159837	0.0231055
Blvrb	629	0.00543315	0.0501778	0.0226456	0.0816813
Lamc1	630	0.000726618	0.00917727	0.136785	0.00399096
Zswim8	631	0.000729089	0.00919773	0.088879	0.035379
Arf6	631	0.00550099	0.050685	-0.116456	0.152456
Mindy2	632	0.000733615	0.00923331	0.0985062	0.021223
Smg1	632	0.00276323	0.0282695	0.123749	0.123747
Mfge8	633	0.000738184	0.00926926	0.166214	0.0206754
Kmt2e	633	0.00382207	0.0371699	0.142519	0.159178
Pacsin3	634	0.000747808	0.00937923	0.129443	-0.0529116
Pgf	634	0.00280611	0.0285453	0.0691911	0.0685488
Rhoq	635	0.000752145	0.00941181	0.109599	-0.0115553
Fosl2	635	0.00562117	0.0514316	0.0783629	0.117004
Fgfrl1	636	0.000768094	0.00960028	0.0772681	0.0208383
Luzp1	636	0.00566944	0.0517857	-0.0572171	0.141675
9930021J03Rik	637	0.000785509	0.00980664	0.107562	0.0484885
Mcub	637	0.00568735	0.0519054	-0.130267	0.0867142
Zfp654	638	0.000795159	0.00991567	0.0620742	0.0337254
Glrx	640	0.000802794	0.00998787	0.156621	0.126355
Gpr137b	641	0.000823449	0.0102331	0.161677	-0.00974674
Nr1d2	641	0.00574384	0.0523327	0.0387441	0.0762309
Gm42418	642	0.000827604	0.0102729	0.345335	-0.0393324
Kctd11	642	0.00575424	0.0523834	-0.00540925	0.0839535
Golga4	643	0.000840934	0.0104264	0.15871	0.0276995
Cdk5r1	643	0.00581671	0.0529076	-0.0292353	0.0580043
Acaa1a	644	0.000844541	0.0104472	0.134963	-0.0362248
Nptn	644	0.00588147	0.0534518	0.0755094	0.109949
Lsg1	645	0.000851246	0.0104979	0.108304	-0.070857
Lbh	645	0.00593041	0.0538513	-0.00270909	0.0880055
Pex5	646	0.000851548	0.0104979	0.0872431	0.0590278
Kcnq1ot1	646	0.0060028	0.0543819	0.142481	0.168406
Gtpbp4	647	0.000875663	0.0107829	0.16969	-0.0620267
Uspl1	647	0.0060358	0.0545794	-0.0290004	0.0896176
Rps14	648	0.000876988	0.010787	0.112537	0.0919525
Eml5	648	0.00605066	0.054668	-0.00762461	0.0249831
Epgn	649	0.000881365	0.010804	0.0467851	0.0202999
Mex3a	650	0.000882926	0.0108109	0.129903	-0.00969604
Med7	650	0.00609688	0.0550229	-0.104731	0.109569
Igfbp5	651	0.00610011	0.0550229	0.0603421	0.073621
Stip1	652	0.00617711	0.0556248	0.0165605	0.140891
Itga6	653	0.000905672	0.0110394	0.15908	0.0770868
Fam83h	653	0.00618751	0.0556534	0.0364894	0.0918272
Serpine2	654	0.000913233	0.0111191	0.143291	0.078332
Prkci	655	0.000933712	0.0113556	0.0854682	0.0580714
2310057M21Rik	655	0.00619057	0.0556534	0.062411	0.0739784
Bach2	656	0.000940658	0.0114144	0.0576971	-0.00119175
Gramd3	656	0.000979153	0.0118022	0.101593	0.0901749
Lrpap1	657	0.000956301	0.0115875	0.119784	0.0676502
Rpl13a	657	0.00624596	0.0561048	-0.378883	0.133715
Abcc3	658	0.000957895	0.0115875	0.0750679	-0.241996
Sbno1	659	0.000958134	0.0115875	0.120807	-0.00465888
Zc3h3	660	0.00655164	0.0586074	0.0276001	0.0383826
Wnt4	661	0.00657545	0.0587718	0.0151758	0.0265656
Aplp2	662	0.000996626	0.0119994	0.167617	0.0465034
Lactb	662	0.00352814	0.0347802	0.0750688	0.0801562
Clasp1	663	0.00100838	0.0121274	0.11131	0.0380051
Csnk1g3	663	0.00672509	0.0599608	0.0764171	0.116114
Os9	664	0.00101134	0.0121496	0.121932	0.0176625
Dap	664	0.00674968	0.0601305	-0.05634	0.165164
Il6	665	0.00102478	0.0122837	0.0356228	0.0135947
Litaf	667	0.0010494	0.0125649	0.167841	0.126579
Rbbp6	667	0.00706407	0.0626733	-0.0189364	0.137095
Ptpn13	668	0.00106079	0.0126666	0.10783	-0.0413316
Ankrd12	669	0.0010614	0.0126666	0.151953	0.0934821
B4galt5	670	0.00107423	0.0127915	0.112427	0.0794121
Fam133b	670	0.00366627	0.0359454	0.136082	0.144961
Trabd2b	671	0.00110936	0.0131664	0.0589636	-0.00884999
Gm17056	671	0.00733663	0.0646675	-0.0131139	0.0308029
Selenom	672	0.00112046	0.0132593	0.151906	-0.042691
Aloxe3	672	0.00738662	0.0650545	-0.0110669	0.0224944
Stx5a	673	0.00114118	0.0134848	0.132831	0.023858
Soat1	673	0.00739513	0.0650545	-0.0584033	0.0706102
Gnaq	674	0.00114463	0.0135109	0.119451	-0.0134608
Lat2	674	0.00746756	0.0655546	-0.0723497	0.0218591
Dip2c	675	0.00117653	0.0138121	0.0705785	0.0501031
Xpo6	676	0.00118661	0.0138892	0.10097	0.033556
S100a6	676	0.00754541	0.0660273	-0.233354	0.130618
Arhgap26	677	0.00118695	0.0138892	0.0743487	-0.0410929
Fmnl3	677	0.00754581	0.0660273	0.0480679	0.0572143
Ralb	678	0.00121133	0.0141592	0.145593	0.0444117
Akap8l	678	0.00378388	0.0369212	0.102031	0.100872
Smad3	679	0.00121962	0.0142254	0.115062	-0.0140584
Sde2	679	0.00764481	0.0667064	0.0452115	0.134987
Tcn2	680	0.00125224	0.0145588	0.0533667	0.0165794
Map1b	681	0.00129759	0.0150055	0.181481	-0.145924
Adam8	681	0.00774621	0.0673454	0.0538573	0.0755245
Plxnd1	682	0.00130443	0.0150682	0.0630083	0.0567406
Slc39a6	682	0.00775316	0.0673517	0.0312246	0.0985785
N4bp2l1	683	0.00131132	0.0151158	0.0384522	0.0286668
Pik3ca	683	0.00413764	0.0397038	0.0959365	0.102571
Pdk1	684	0.00133262	0.015345	0.0664942	0.0390205
Ccnt1	684	0.00280864	0.0285453	0.11296	0.107117
Amotl2	686	0.00788586	0.0683399	0.0453377	0.0738652
Ralgds	687	0.00135913	0.0156336	0.128621	0.0503291
3110043O21Rik	687	0.00790552	0.0684258	0.0357686	0.0850802
Ptprj	688	0.0013767	0.0158021	0.0619915	0.00903917
Cep85	688	0.00790841	0.0684258	-0.00417078	0.0382815
Nhs	689	0.00137978	0.0158206	0.0785737	-0.0404123
Osbpl8	690	0.00138801	0.0158983	0.0953135	0.0370633
Il1rl1	690	0.00407392	0.0393013	0.0444188	0.0446968
Pdcd4	691	0.00140538	0.0160802	0.0772696	-0.012907
Bap1	691	0.00818773	0.0706167	0.0375319	0.0542721
Tspan5	692	0.0014655	0.0167327	0.0893237	-0.0134846
Cramp1l	692	0.00823907	0.0709582	0.0357218	0.080168
Ptprk	693	0.00148955	0.0169715	0.144696	-0.237176
Ptdss1	693	0.00824057	0.0709582	0.0311089	0.0920531
Mgst1	694	0.00149707	0.0170392	0.16766	-0.250618
Epc1	694	0.00824699	0.0709582	0.00530243	0.0807122
4930579C12Rik	695	0.0082566	0.070961	-0.0911484	0.0652904
Pdia6	696	0.00158736	0.01801	0.192531	-0.0106277
Samd4b	696	0.00832664	0.0714695	0.0333914	0.10499
Sh3gl3	697	0.00833283	0.0714695	-0.0350703	0.0386086
Vps50	699	0.00165129	0.0186961	0.0842123	-0.0224963
Angptl6	699	0.00858233	0.0733769	-0.0148164	0.0213222
Inpp5a	700	0.008606	0.0735212	0.0179404	0.0313577
Map3k2	701	0.00865302	0.0738268	0.10356	0.127506
Vwa5a	702	0.00170552	0.0192476	0.145202	-0.147301
Lsmem1	702	0.00865602	0.0738268	0.00896215	0.0332558
Vcl	703	0.00171126	0.0192744	0.12618	0.0400332
Slc16a10	703	0.00867444	0.0738268	0.0160965	0.0314011
Rpl18a	704	0.0017195	0.0193304	0.101032	-0.00702345
AC127341.3	704	0.00869991	0.0739731	-0.0230715	0.054101
Arg2	705	0.00171981	0.0193304	0.0485003	0.0136389
Dnajb2	705	0.00873518	0.0742147	0.0571871	0.0814668
Ddx3x	706	0.00173647	0.0194945	0.161496	0.00436527
Tcf12	707	0.00173981	0.0194945	0.119213	-0.082809
Rock2	707	0.00882188	0.0748339	0.0758202	0.139593
S100a1	708	0.0017682	0.019731	0.149859	0.00502042
Spty2d1	709	0.00885344	0.0750428	0.0527316	0.106232
Ythdf1	710	0.00182215	0.0202599	0.113294	0.0722896
Gatm	710	0.0089514	0.0757544	-0.0583223	0.0339551
Eps15	712	0.00183982	0.0204039	0.102434	0.0248486
9130230L23Rik	714	0.00934332	0.0788247	0.00851795	0.0232192
Asap2	715	0.00186769	0.0206706	0.153402	0.00793455
Slc2a6	715	0.00944243	0.0795368	-0.00143512	0.023658
Lats2	718	0.00188541	0.020803	0.07668	0.0451874
Arhgap29	718	0.00966179	0.0810064	-0.0134893	0.0478718
Pex3	719	0.00191312	0.0210871	0.088243	-0.0171023
Glud1	719	0.00968978	0.0810465	0.00325126	0.13588
Tnik	720	0.00191994	0.0211408	0.076384	0.0430407
Ptov1	721	0.00194386	0.0213815	0.146852	-0.104215
Kdm7a	721	0.00292031	0.0295415	0.077691	0.0720942
Stk38l	722	0.00194575	0.0213815	0.0590419	-0.0133463
Fam83d	722	0.00977928	0.0815493	-0.0336951	0.0239025
Txnrd3	723	0.00197831	0.0216702	0.0432869	-0.0107725
Fam204a	723	0.00979868	0.0816482	-0.109928	0.126514
Plcg2	724	0.00198003	0.0216702	0.104621	-0.0779577
Rbbp8	724	0.00986578	0.0821301	-0.119945	0.0957889
Gm26853	725	0.00198245	0.0216748	0.0812677	0.0393289
Ubn1	725	0.0098717	0.0821301	0.0123638	0.111591
Nisch	726	0.00198676	0.0217	0.142844	-0.0994598
Chordc1	726	0.00495018	0.0464707	0.126473	0.130403
Eif1a	727	0.0019948	0.0217658	0.165573	0.132127
Serpinf1	728	0.0100645	0.0834779	0.00554827	0.0278472
Stap2	730	0.00203676	0.0222013	0.0965211	-0.0319068
Nsd3	730	0.0102148	0.0845295	0.0585649	0.126721
Gm26532	731	0.010254	0.0847891	0.0607818	0.0716553
Ndfip1	732	0.00207376	0.0225591	0.112533	0.0358489
Clta	733	0.00208294	0.0226362	0.15067	0.0441995
Actg1	733	0.010422	0.0860474	0.0341707	0.129104
Acot7	736	0.010615	0.0873076	-0.154969	0.133303
Tspan14	737	0.00214204	0.023232	0.0798786	-0.0192868
Gipc2	737	0.0106901	0.0878585	-0.0371219	0.0745277
Celf4	738	0.00215099	0.0233056	0.147707	0.0575465
Phlda2	738	0.0107851	0.0884377	-0.0783385	0.105997
Rbm47	739	0.00216078	0.0233883	0.108482	-0.00951974
Tbc1d7	739	0.0108281	0.0887235	-0.0338434	0.0439061
Nbeal1	740	0.00218699	0.0236438	0.0999088	0.0186725
Cd109	740	0.0108891	0.0889865	0.0208587	0.0363507
Gabarapl1	741	0.0109601	0.0893985	0.0554194	0.0870569
Nedd4	742	0.00225115	0.0242323	0.16067	-0.0452622
2510017J16Rik	742	0.0110393	0.0899625	0.00472678	0.0442905
Smad2	743	0.00227415	0.0243959	0.0965049	0.0738274
Dyrk1a	743	0.0111861	0.0908996	0.0225172	0.0777287
Pitpnc1	744	0.0022805	0.0244398	0.0800437	0.0170261
Mfsd14a	744	0.00562101	0.0514316	0.101595	0.107545
Crtap	745	0.00228593	0.0244737	0.0979831	0.02056
Usp19	745	0.0112439	0.0912321	0.0725125	0.102461
Prex1	746	0.00234314	0.0250367	0.0411035	0.0139136
Tmbim6	747	0.00235116	0.0250729	0.160967	0.0212988
Snrnp48	747	0.0113108	0.0916377	0.0926363	0.12875
Cltc	748	0.0114567	0.0926118	0.042099	0.128243
Btbd9	749	0.00236001	0.0251424	0.1093	0.080386
Relb	749	0.0117376	0.0945296	0.103093	0.122902
Rpl9	750	0.00237156	0.0252407	0.0989242	-0.015885
Safb2	750	0.0117968	0.0948654	0.100338	0.118945
Nlgn2	751	0.00238462	0.0253548	0.045612	-0.00338629
Phf1	752	0.00239957	0.0254887	0.064587	0.0136055
Kansl1l	752	0.0120103	0.0960822	0.0176387	0.0568344
Hk2	753	0.00240697	0.0255172	0.106682	0.0103998
Sirt1	753	0.0120856	0.0965425	0.0333171	0.0666841
Saraf	754	0.00241753	0.025579	0.130714	0.0374784
Chek1	754	0.0121079	0.0965777	-0.182731	0.0424909
Gapvd1	755	0.00242999	0.0256857	0.125108	0.0826064
Snx3	756	0.0121626	0.0969425	-0.1845	0.141778
Bmpr2	757	0.00243876	0.0257533	0.102194	-0.0222156
Pnpla8	758	0.00244533	0.0257976	0.11815	0.0668689
Frat2	758	0.0122875	0.097773	0.026144	0.0541413
Ctnnb1	760	0.00251261	0.0264043	0.148498	-0.0646075
Actn1	760	0.0127959	0.101245	0.00792701	0.12637
Pink1	761	0.00252454	0.026504	0.0948828	0.0101972
Rac1	761	0.0128584	0.101665	-0.126643	0.129145
Atp6ap2	762	0.00253785	0.0265921	0.111189	0.0914148
Ifnar1	763	0.00255998	0.0267981	0.0856773	0.0140373
Prag1	764	0.00259225	0.0270425	0.123436	-0.0498444
Rasgef1b	764	0.0130078	0.102696	0.025909	0.0351232
Lrp5	765	0.00259685	0.0270425	0.0730684	0.0215102
Thap2	765	0.0130427	0.102897	0.048695	0.0980198
Col4a1	766	0.00259832	0.0270425	0.112368	0.0168197
Il1rap	766	0.0131114	0.103286	0.033829	0.0592893
Fstl3	767	0.0132081	0.103823	0.0385892	0.048339
Usp8	768	0.00264291	0.0273014	0.110345	0.0542489
Antxr1	769	0.00266329	0.0274809	0.0352478	0.0125239
Adipor2	769	0.0134714	0.105663	0.0663113	0.0897734
Tmem57	770	0.00267451	0.0275704	0.121729	0.0589503
Glul	770	0.0135505	0.106053	-0.0675692	0.0696451
Gbe1	771	0.00426926	0.0407859	0.06618	0.0622455
Fut8	772	0.00269723	0.0277781	0.139972	0.0265598
Rpl26	772	0.0135835	0.10608	0.0322557	0.0962739
Foxn3	773	0.0027012	0.0277925	0.105275	0.0258387
Selenos	774	0.00271383	0.0278894	0.140565	-0.0128848
Pxn	774	0.0137623	0.107245	0.0282944	0.102352
Clstn1	775	0.00271576	0.0278894	0.103445	0.0318317
Uck2	775	0.0141875	0.110083	0.032667	0.132915
Cpeb2	776	0.0142584	0.110238	0.000558151	0.0452662
Tnfrsf11b	777	0.00276896	0.0282747	0.0282916	0.0232378
Gorasp2	777	0.00715385	0.063366	0.111632	0.114075
Med26	778	0.0144136	0.111041	0.0321135	0.0711591
Cry2	779	0.00279652	0.0284756	0.0393938	-0.000372279
M6pr	779	0.00517415	0.048298	0.11418	0.104414
Gdpd3	780	0.0145319	0.111794	0.000684933	0.026793
Slc6a8	781	0.014575	0.112045	0.00264968	0.0559186
Egln2	783	0.0147941	0.113247	0.0203021	0.0902799
Zfyve16	784	0.00292624	0.0295739	0.0727294	-0.0163938
Atp6v1d	784	0.0148527	0.113615	-0.0924512	0.11585
Fam13b	785	0.00294387	0.0297243	0.0802377	0.0578392
Msh5	785	0.0150135	0.114764	-0.0433426	0.025326
Gja4	786	0.015073	0.115074	0.00501886	0.0202439
Ncoa4	787	0.00300741	0.0303001	0.0775083	0.042909
Brd4	787	0.0150753	0.115074	0.0533532	0.127257
Clip4	788	0.00300929	0.0303001	0.141248	0.00377449
H2-Ab1	789	0.00308381	0.0309928	0.2005	-0.151884
Baz1a	789	0.0156137	0.118765	0.106169	0.132512
Tead1	791	0.00317606	0.0318382	0.115665	-0.00705371
Dstn	791	0.00400667	0.038687	0.147984	0.133799
Zpr1	792	0.00318687	0.03191	0.106577	0.0616821
Nr3c1	792	0.0157794	0.119773	0.0753778	0.101464
Ankrd28	793	0.00322366	0.0322485	0.0995567	-0.0191661
Tgif1	793	0.0108645	0.0888866	0.129294	0.145675
Scamp1	794	0.00325178	0.0324399	0.0745238	0.0109809
Hectd1	794	0.0158263	0.119961	0.0770134	0.121667
Ercc3	795	0.0158462	0.120028	0.00829136	0.0531021
Ubxn7	796	0.00330588	0.0329189	0.0766377	0.00826968
Map3k8	796	0.0159073	0.120322	0.00383013	0.0549633
Glis3	797	0.00340298	0.0337616	0.0967738	0.0497309
Csn3	797	0.0161253	0.121631	0.0667069	0.138166
Tmem87a	798	0.00348586	0.0345205	0.0688609	-0.0177611
Rasd1	798	0.0163951	0.123119	-0.027574	0.0190675
Dnajc25	799	0.00348966	0.0345266	0.102984	0.0900082
Tmem43	799	0.0164136	0.123119	0.0699637	0.0937559
Mapk8	800	0.0165299	0.123734	0.0698692	0.0842268
Ptpn23	801	0.00351963	0.0347278	0.099239	0.0688675
Rab5a	801	0.0165432	0.123748	0.0643101	0.123268
Dlgap1	802	0.0168199	0.125471	0.0147443	0.0334739
Glg1	804	0.00359459	0.0353972	0.121104	0.0133243
Ubap2l	804	0.0170978	0.127281	0.000213814	0.12293
Dync1h1	805	0.00359727	0.0353972	0.134849	0.00430785
Birc3	805	0.0171747	0.127766	0.0532319	0.0736184
Akap9	806	0.00361101	0.0355001	0.145198	-0.163537
H13	807	0.00363522	0.0357056	0.14668	-0.0302625
Tacc2	807	0.0100925	0.0836459	0.0905577	0.0994384
Pfkfb4	808	0.0175623	0.129846	-0.00216012	0.0401401
Cry1	809	0.00365918	0.0359084	0.0718632	0.0260279
Slc19a2	809	0.0179143	0.132171	-0.0195503	0.0473625
Stom	810	0.00368862	0.0361118	0.0819831	-0.10797
Tex10	810	0.0179256	0.132171	0.0341915	0.0805357
Heatr1	811	0.00368992	0.0361118	0.072194	0.00698729
Pde4d	811	0.0180258	0.132672	-0.00615137	0.0330693
Agtpbp1	812	0.0181285	0.133123	0.00909779	0.0511866
Crim1	813	0.00375813	0.0367186	0.0827538	0.00416966
Kif13a	813	0.0182279	0.133671	0.0375774	0.0434616
Tnfrsf21	814	0.00375871	0.0367186	0.05969	-0.021929
Snx22	814	0.0096778	0.0810151	0.028581	0.0298503
Pgam1	815	0.0185563	0.1354	0.0962845	0.143999
Ugcg	816	0.0187008	0.136217	0.0638624	0.076269
Ski	817	0.00378626	0.0369212	0.107949	0.0717778
Lilr4b	817	0.00936329	0.0789316	0.0656411	0.065134
Gm49207	818	0.0187445	0.136351	0.0122102	0.0385359
Rev1	819	0.00381087	0.0370943	0.0800376	0.0456493
Pwwp2a	819	0.0188395	0.136945	-0.0394261	0.0740307
Jmy	820	0.00384296	0.037306	0.0843322	-0.000416093
Gpha2	820	0.0190079	0.137712	-0.0225269	0.0449902
Ifi203	821	0.00389063	0.0377349	0.178697	0.143084
Cav1	821	0.00929578	0.0784848	0.0466247	0.0453394
Cnot6l	822	0.00389874	0.0377798	0.107936	0.08002
Atp11b	822	0.0190696	0.137797	-0.0191438	0.092992
Tmem170b	823	0.0190705	0.137797	0.0282455	0.0396044
Cc2d2a	824	0.00395127	0.0382545	0.0590346	0.0355447
Fermt1	824	0.0132854	0.104355	0.126196	0.139295
Ramp1	826	0.00397316	0.0384111	0.0970748	-0.0802013
Otud1	826	0.0192411	0.138827	-0.0362476	0.03458
Yes1	827	0.00397454	0.0384111	0.099639	0.048434
Slc25a37	827	0.0192738	0.138827	-0.0488192	0.0721804
H60b	828	0.0193027	0.138827	-0.0094435	0.0503607
Zfp36	829	0.0193157	0.138827	0.000678035	0.0854946
Mroh1	830	0.00408878	0.0394096	0.0548992	0.0453286
Dcaf1	830	0.0193811	0.139204	0.0596967	0.0805454
H2-Eb1	831	0.00416429	0.0399241	0.202577	-0.132733
Rnf149	831	0.00767899	0.0668146	0.117416	0.110339
Ikbkb	832	0.004172	0.0399626	0.107298	0.00395404
Amd2	832	0.0194577	0.139662	0.025841	0.0385642
Rab10os	833	0.00420328	0.0402267	0.0960765	0.0597596
Capn2	833	0.0195327	0.140108	0.0287576	0.11799
Cxcl3	834	0.00425844	0.0407185	0.0628334	0.0361084
Cog3	836	0.00427737	0.0408154	0.0426847	-0.00471213
Kyat1	836	0.0153999	0.117303	0.0223682	0.0241285
Ythdf2	837	0.00428355	0.0408154	0.129691	0.0988569
Tmem191c	837	0.0200466	0.143603	0.0187664	0.0250125
Arl13b	838	0.0200839	0.143775	0.0504357	0.107186
Man1c1	840	0.00439675	0.0417826	0.0239354	-0.00281409
Tet3	840	0.0201512	0.144162	0.00772241	0.0924586
Csde1	842	0.00452612	0.0428991	0.139512	0.114305
Sik3	842	0.0202968	0.145012	0.0541109	0.0691787
Pum3	843	0.00455063	0.043056	0.11367	0.0149579
Glyr1	844	0.00460907	0.0435327	0.0925573	0.0723034
Chmp4b	844	0.0203909	0.145491	0.0776463	0.126959
Ddx54	845	0.00463199	0.0437111	0.107485	-0.0526494
Zfp438	845	0.0205551	0.14647	-0.00314745	0.0162779
Smad5	846	0.00471742	0.0444259	0.0950766	0.00694778
Bloc1s4	847	0.00472004	0.0444259	0.117278	0.0121404
Insig1	847	0.0207668	0.147784	-0.00848223	0.0448466
Tgif2	848	0.0208937	0.148395	-0.0261386	0.0397267
Micall2	849	0.00490398	0.046077	0.0548275	-0.00622118
Rap1b	849	0.00961253	0.0806637	0.132325	0.127967
Zbtb11	850	0.021007	0.149043	0.0532097	0.0778588
Lrrc8a	851	0.00498606	0.0467343	0.0663442	0.0235871
Igf2bp2	851	0.00664357	0.0592827	0.125361	0.113301
Ago2	852	0.00503594	0.0471531	0.135303	0.104356
Med13	852	0.0105189	0.0867808	0.114726	0.112646
Mau2	853	0.00511861	0.0478858	0.105184	-0.0365487
Nsmce2	853	0.0210827	0.149443	-0.113568	0.0931578
Kif1b	854	0.00515324	0.0481681	0.113981	0.0689812
Kbtbd2	855	0.021163	0.14987	0.0295193	0.0752967
Cd274	856	0.0212897	0.150269	-0.0790863	0.0465027
Twistnb	857	0.00522142	0.0485641	0.125644	0.0284251
Lmbrd2	857	0.0212968	0.150269	0.023465	0.0649863
Cnot2	858	0.00522252	0.0485641	0.0996323	0.0537527
Hgs	858	0.021379	0.150557	0.0119067	0.0156583
Syne2	859	0.00524477	0.0487291	0.113275	-0.0145092
Rgl2	859	0.0214083	0.150665	-0.0561703	0.0584268
Cmip	860	0.00526263	0.0488531	0.0899317	0.0439238
Ap4m1	860	0.0215049	0.151149	0.0378044	0.0583396
Chdh	861	0.00529775	0.0491244	0.024726	0.01214
Lrrfip2	861	0.0215723	0.151524	0.0687506	0.104045
Nsmf	862	0.00531598	0.0491796	0.079242	-0.00339399
Fermt2	862	0.0212445	0.150191	0.079246	0.0972923
Tra2b	863	0.00542904	0.0501778	0.141295	0.0541128
Fgd6	863	0.0216098	0.151689	0.0107634	0.0603208
Crlf2	864	0.0216478	0.151857	0.0418937	0.0955001
Pou6f1	865	0.00548354	0.0506001	0.0247268	0.00303924
1600020E01Rik	866	0.0217975	0.152611	0.0163324	0.0531821
Dsc2	867	0.00550266	0.050685	0.0396213	0.00547785
Rnf122	867	0.0218351	0.152775	0.00537498	0.0378137
Psd3	868	0.00550679	0.050685	0.039727	-0.00175426
Atp9a	869	0.00551585	0.0507252	0.0876315	-0.0158744
Spaca6	869	0.021985	0.15324	-0.00510857	0.059874
Rpl17	870	0.00556187	0.051105	0.101312	0.0806378
Bmp7	870	0.0110458	0.0899625	0.0474638	0.0479299
Ppp1r12a	871	0.00557118	0.0511471	0.133903	0.0219835
Ttc39c	871	0.0221194	0.153869	-0.110446	0.0654449
Lurap1l	872	0.00557877	0.0511734	0.0495485	0.0164396
Fbxl3	872	0.0110634	0.090038	0.0650569	0.065287
Adam17	873	0.00560264	0.0513489	0.0964792	0.049565
Tpm1	873	0.0221798	0.154191	-0.116237	0.137339
Slc16a2	874	0.0056363	0.0515265	0.036573	-0.0261797
Acvr1	874	0.0222196	0.154367	0.0366513	0.0526707
Nfrkb	875	0.00569384	0.0519209	0.0595943	-0.0152388
D16Ertd472e	875	0.0222338	0.154367	-0.00122225	0.0703308
Snd1	878	0.00594315	0.0539217	0.0860724	0.00781046
Bclaf1	878	0.0122939	0.097773	0.113196	0.123374
Sec24b	879	0.0234767	0.161854	-0.0264226	0.0792049
Socs6	880	0.00600392	0.0543819	0.0969512	0.0794078
Tubb2a	880	0.0135734	0.10608	0.115771	0.129226
Col8a1	881	0.00601055	0.0543965	0.139976	-0.0227247
Cobll1	882	0.0239467	0.16499	0.0324782	0.0614656
Dvl3	883	0.00614566	0.0553877	0.0669688	0.00521808
Cyp2c55	883	0.0241509	0.16608	-0.0754526	0.0260309
Tmem131l	884	0.0242856	0.166688	0.0158666	0.0683796
Slc11a2	885	0.00626113	0.0561944	0.0688081	0.00632231
Mitf	885	0.0243596	0.16709	0.00963149	0.0217799
Vamp8	886	0.00626878	0.0562164	0.138875	-0.101407
Mblac2	886	0.024378	0.167111	0.00668501	0.0246907
Tor1aip1	887	0.0122741	0.0977589	0.111307	0.116761
Atp2a2	888	0.00638774	0.0572359	0.118142	0.0704902
Upk3bl	888	0.0246469	0.168527	0.000843178	0.0356655
Diaph1	889	0.00655056	0.0586074	0.117992	0.0579892
Mbnl2	889	0.0123419	0.0980826	0.113458	0.119656
Snx9	890	0.00658398	0.0587995	0.128977	0.0355903
Gm26877	891	0.0249885	0.170539	-0.0374423	0.0474875
Erlec1	892	0.00682484	0.0607501	0.0944497	-0.00429667
Lmo4	892	0.025195	0.171624	-0.0936443	0.0768336
Naga	893	0.00692565	0.0615967	0.0417261	0.0143682
Tmem171	893	0.0252406	0.171788	-0.0640062	0.0527915
Ubr3	894	0.00701826	0.0623691	0.0702492	-0.00458979
Aaed1	894	0.0252508	0.171788	0.0323345	0.0619321
Tgfbr3	896	0.00706093	0.0626733	0.0339513	-0.0345129
Tm9sf2	897	0.00714541	0.0633431	0.108386	0.027541
AC165953.2	897	0.0256596	0.173696	0.0083946	0.0411913
Yrdc	898	0.0258197	0.174452	0.0636929	0.118268
Ephb4	899	0.00721901	0.0638909	0.067146	-0.0309622
Ino80d	899	0.0129582	0.102379	0.0881826	0.0923298
Polr3d	900	0.00723532	0.0639829	0.109307	0.0589615
Ttc9	900	0.0259423	0.175171	0.0435633	0.0665561
Fcgbp	901	0.00728921	0.0644068	0.0475013	0.00716252
mt-Atp8	901	0.0260991	0.17601	-0.0411989	0.104464
Simc1	902	0.00730102	0.0644079	0.0635436	0.0167385
Slc8b1	902	0.0262784	0.176889	0.0274642	0.0390879
Esyt3	903	0.00730122	0.0644079	0.0282737	-0.0170624
Cfap43	904	0.0266446	0.178909	-0.0495462	0.0541537
Fam50a	906	0.0274662	0.183515	0.0380832	0.07747
Deptor	907	0.00739857	0.0650545	0.0682381	0.0190967
Usp6nl	908	0.00743667	0.0653364	0.075672	0.0244522
Maml1	908	0.0280243	0.18593	0.0167919	0.0433486
S100a7a	909	0.00750929	0.0658676	0.0382805	0.03316
Arhgap23	909	0.0282546	0.187165	0.00682232	0.0519415
Scamp2	910	0.00751758	0.0658868	0.0893186	0.0638606
Gk5	910	0.0142004	0.110104	0.0348506	0.0339702
Tmprss11e	911	0.0285607	0.188962	0.0730267	0.102578
Tmem102	912	0.00763797	0.0667064	0.0362571	0.0058284
Eif2ak3	912	0.0288314	0.19058	0.0160676	0.0293748
Myof	913	0.028862	0.19058	0.0851363	0.114149
Rrs1	914	0.00765173	0.0667064	0.143265	-0.135639
Celf1	915	0.00765308	0.0667064	0.119193	0.0560336
Urb2	916	0.00765948	0.0667064	0.0646424	0.0262444
Ttc19	916	0.029362	0.192966	0.0140174	0.0829894
Rnd3	917	0.00766039	0.0667064	0.103124	0.0698397
Fnbp1	917	0.0147138	0.112792	0.0852125	0.0802411
Slc22a4	919	0.029667	0.19438	-0.00569099	0.0340912
Stau1	920	0.00781578	0.0678412	0.104212	0.0422728
Sin3b	921	0.00787029	0.0682596	0.152729	0.0886738
AC160336.1	921	0.0301668	0.197177	-0.0739787	0.0328935
Ido1	922	0.0304968	0.198854	-0.0737458	0.0407166
Rnmt	923	0.00791543	0.0684318	0.100746	0.037292
Rmnd5a	923	0.0152952	0.116588	0.0542688	0.0562057
Ttll3	924	0.00798955	0.0690174	0.043629	0.023034
Btbd7	924	0.0306875	0.199977	0.0502476	0.0978951
Thoc2	925	0.00801073	0.0691452	0.11325	0.00413824
Tpp2	925	0.0114424	0.0925658	0.102957	0.0945213
Arhgap18	926	0.0310839	0.201831	0.0257665	0.0569839
Tnip2	927	0.00826043	0.070961	0.0622857	-0.0468967
Gse1	928	0.0311563	0.202098	0.030474	0.0546161
Spint1	930	0.00841857	0.0721477	0.104965	0.0118377
Stag1	930	0.0314054	0.203309	0.00505362	0.0808839
Fam32a	931	0.00848103	0.0726256	0.131464	-0.185787
Sh3pxd2a	932	0.00854181	0.0730882	0.0781292	0.0569306
Krt80	932	0.0315151	0.203663	0.0153947	0.027858
Rdh10	933	0.00866857	0.0738268	0.112892	-0.0025727
Myo6	933	0.0316002	0.203913	0.0286844	0.0468158
Krtcap3	934	0.00867588	0.0738268	0.123637	-0.0834298
Crabp2	934	0.0316894	0.204292	0.00281308	0.0289442
Wwtr1	935	0.0317914	0.204827	0.011916	0.11094
Atraid	936	0.00875591	0.0743326	0.11591	0.00469064
Ablim1	936	0.0159879	0.120678	0.0630433	0.0609571
Tle3	937	0.00888714	0.0752695	0.0892273	0.0462276
Rgs16	937	0.0320288	0.205989	-0.174955	0.0477302
Fcho2	938	0.00927699	0.0784485	0.0944084	0.0415765
Cdk8	938	0.0161529	0.121754	0.0759122	0.0817548
Dock5	939	0.00929281	0.0784848	0.062284	0.0156719
Tpi1	939	0.0324346	0.207981	-0.0440535	0.143307
Ccdc80	940	0.0324882	0.208202	0.00735482	0.0196842
Fyttd1	941	0.00946497	0.0796647	0.106076	-0.0559723
Cggbp1	941	0.0326071	0.208775	-0.0496385	0.112098
Hcar2	942	0.00947973	0.079727	0.0345559	0.0187738
Zbtb38	943	0.00948889	0.0797421	0.124534	-0.0731289
Tle1	943	0.0164635	0.123372	0.0690744	0.0702075
Rsrc2	944	0.0329523	0.210387	-0.0573259	0.120144
Plxnb2	945	0.0332301	0.211713	0.026821	0.0832851
Klf13	946	0.00961347	0.0806637	0.114888	0.0672421
Crybg3	946	0.0332563	0.211745	-0.023875	0.0396389
Urb1	947	0.00967663	0.0810151	0.0498618	0.0123918
Cdc73	947	0.0334093	0.212594	0.0339778	0.079392
Cdk6	948	0.00969809	0.0810465	0.114599	0.0246505
Il13ra1	949	0.00970401	0.0810465	0.0995967	-0.018093
Cks2	949	0.0335547	0.213275	-0.659852	0.104316
Camk1d	950	0.00976829	0.0815204	0.0368089	0.0100209
Cars	950	0.0335558	0.213275	-0.166745	0.072985
Bnip2	951	0.00996845	0.0828714	0.106678	0.0289789
Star	951	0.0335933	0.213287	0.0190779	0.0284238
Gnptg	952	0.00999678	0.0830117	0.0712402	0.0351574
Phactr4	952	0.0336956	0.21355	0.0399174	0.0567392
Ptk7	953	0.0100007	0.0830117	0.0565291	-0.0147905
Plekhf2	953	0.0336977	0.21355	-0.0579534	0.0688086
Lmbrd1	956	0.0101037	0.0836745	0.0715427	0.0308584
Zswim4	956	0.0339321	0.214533	0.00818821	0.0439709
Ndufa6	957	0.0340052	0.214626	0.0732343	0.11189
Ddi2	958	0.0340593	0.214626	0.00989596	0.07135
Trps1	959	0.0103788	0.085756	0.121264	-0.0586084
Tes3-ps	959	0.0233502	0.161188	0.0173592	0.0183731
Chmp7	960	0.0105831	0.0871981	0.0596029	-0.0540734
Spats2	960	0.0340657	0.214626	-0.0160923	0.0471283
Zbtb33	961	0.0105898	0.0871981	0.0379548	-0.00323535
Ube2e2	962	0.0105936	0.0871981	0.0748223	0.0093194
Gjb3	962	0.0341034	0.214739	-0.195518	0.108915
Lyst	963	0.010702	0.0878898	0.0606651	-0.0798311
Phf3	963	0.0342045	0.215125	-0.00554886	0.113709
Tnk1	964	0.0107684	0.0883674	0.059521	-0.0188434
Scx	965	0.0343244	0.215503	-0.0333769	0.0669299
Vcp	966	0.0108553	0.0888787	0.136119	0.0324451
Kdelc2	967	0.0108931	0.0889865	0.0574702	0.00161452
Nipal2	968	0.0109495	0.0893799	0.0690514	-0.0667248
Rnpc3	968	0.0349595	0.218225	0.0153112	0.06835
Pkn1	969	0.0111575	0.0907356	0.0697407	0.0246812
Chchd10	969	0.0350099	0.218414	-0.182719	0.062131
Phf13	970	0.0350316	0.218423	-0.0357567	0.0592687
Ntmt1	971	0.0112213	0.0911173	0.10784	-0.011761
BC005561	971	0.0351048	0.218753	-0.020547	0.0792493
Zfp866	972	0.0113091	0.0916377	0.0402293	0.0129596
Csk	972	0.0351961	0.219196	0.0387422	0.0741105
Ano8	973	0.0352919	0.21954	-0.00102714	0.0307461
Tfrc	974	0.0114212	0.0924633	0.0812216	0.0381136
Eml1	974	0.0354041	0.220111	-0.00851891	0.0291587
Bcl9l	975	0.032254	0.207029	0.0381866	0.0459944
Calu	976	0.0114713	0.0926611	0.126046	0.0305243
Bhlhe40	976	0.0359217	0.222562	0.0116187	0.0814093
Arhgef12	978	0.0115548	0.0932659	0.0886664	0.0195866
Blzf1	978	0.036124	0.223432	0.0285706	0.0612125
Podxl	979	0.0116072	0.0936189	0.0583088	-0.0492999
2010109A12Rik	979	0.0180653	0.132748	0.0292175	0.0294079
Chmp2b	980	0.011626	0.0937006	0.11208	0.0167271
Nol8	981	0.0117963	0.0948654	0.0937106	-0.0176671
Ldha	981	0.0354919	0.220404	0.113847	0.14063
Zfp609	982	0.0118588	0.0952932	0.0536655	0.0193808
Rragc	982	0.0184179	0.134609	0.0811205	0.0869863
Pom121	983	0.0118693	0.0953067	0.0916793	0.077412
Lamtor3	983	0.0364392	0.224868	0.00344464	0.0502059
Tle6	984	0.011881	0.0953297	0.0345369	-0.023608
Leng8	984	0.0169443	0.126225	0.0547993	0.050847
Plcd1	985	0.0119081	0.0954762	0.0297817	0.00396518
Pard3	986	0.0119325	0.0956017	0.0908623	0.0491175
Cldn23	986	0.027936	0.185737	0.041227	0.0480715
Stc1	987	0.0119852	0.0959525	0.0639597	0.050256
Kdm6a	987	0.0367399	0.226594	-0.00533495	0.0461751
Kdm5a	988	0.0120258	0.0961354	0.105977	0.00804
Tlcd2	988	0.0368305	0.227024	0.0140797	0.0221657
Ly96	989	0.0120968	0.0965606	0.0524612	-0.00621154
Lin54	989	0.0369682	0.227613	-0.176093	0.0448583
Tspyl1	990	0.0123755	0.0982774	0.0682345	-0.00617818
Ulk1	991	0.0123877	0.0983024	0.0614867	0.022334
Bmt2	992	0.0124894	0.0990366	0.0419636	0.0202344
Mgp	993	0.012509	0.0991195	0.124942	-0.106394
Jmjd6	993	0.0377662	0.231735	0.0483687	0.0934429
Asah2	994	0.0127373	0.100855	0.0298319	0.0200253
Pea15a	994	0.0378689	0.232102	-0.0209816	0.0844706
CT025619.1	995	0.013058	0.102942	0.113452	-0.215181
Selenoi	995	0.0379407	0.23228	0.0578081	0.0871292
Tkt	996	0.0131206	0.103286	0.128374	-0.0336419
Aplp1	997	0.0132046	0.103823	0.017775	0.00732197
Fbxo34	997	0.0381555	0.233331	0.00732499	0.052297
Heg1	998	0.0134132	0.105283	0.0368808	-0.0326403
Ahcyl2	998	0.0382341	0.233679	0.0343175	0.0615531
Efna5	999	0.0135043	0.105812	0.092479	-0.0686703
Trim33	999	0.0392969	0.239499	0.0455808	0.0816092
Galnt3	1000	0.01351	0.105812	0.091756	0.0228689
Ccpg1os	1000	0.0396535	0.241264	-0.00576134	0.037184
Cspp1	1001	0.0135795	0.10608	0.0980394	0.0562589
Ephb2	1001	0.0398876	0.242144	0.0160423	0.0486523
Dennd5a	1002	0.0136038	0.106162	0.0704591	0.0398382
Tspo	1002	0.0399189	0.242199	-0.309701	0.121711
Rpl37	1003	0.0136432	0.106394	0.086849	0.0204882
Jak2	1004	0.0138381	0.107699	0.108513	-0.172505
Orai1	1004	0.0402586	0.244091	0.030521	0.0744323
Sh3rf1	1005	0.0138405	0.107699	0.0700902	0.0287715
Ap1s2	1005	0.0402803	0.244091	0.00553506	0.0393163
Sidt2	1006	0.0404741	0.24488	0.029233	0.0441845
Zbtb1	1007	0.0139546	0.108509	0.0809191	0.0727754
Mex3c	1007	0.040515	0.244991	0.0372721	0.0679164
Ubn2	1008	0.0140656	0.109294	0.0864121	0.0201554
Fgfbp1	1009	0.0140938	0.109434	0.121273	0.029706
Ifi211	1009	0.0408659	0.246625	0.018786	0.0774725
Klhl26	1010	0.0408762	0.246625	0.0360828	0.0462651
Snx16	1011	0.0409486	0.246786	-0.0226298	0.0626676
Cdc42ep4	1012	0.0410234	0.247099	0.0425536	0.0624656
Efemp2	1013	0.0142455	0.110238	0.118777	0.0242541
Peli1	1013	0.041183	0.247647	-0.0708505	0.0795028
Zmym2	1014	0.0142478	0.110238	0.0667042	-0.043063
Gm5617	1014	0.0414123	0.248611	-0.0042404	0.0183945
Trip6	1015	0.0142552	0.110238	0.115248	0.0475459
Sgsm3	1015	0.04151	0.248922	-0.00516	0.0246335
Ltc4s	1016	0.0143215	0.110647	0.0428549	0.00719863
Tmcc1	1017	0.0143427	0.110723	0.0969241	0.0311551
Ankrd37	1017	0.0219287	0.153232	0.034527	0.0360606
Rin2	1018	0.0143518	0.110723	0.0946876	-0.11955
Tcerg1	1018	0.0252753	0.171812	0.0831271	0.0923746
Gm14286	1019	0.0208361	0.14818	0.03267	0.0337031
Elmo3	1020	0.0143924	0.110957	0.0548888	0.0186445
Etfdh	1020	0.0421859	0.251958	0.013594	0.0473672
Plekhm1	1021	0.0145085	0.111693	0.0321066	0.000485576
Ppm1l	1021	0.0422103	0.251958	0.017794	0.035503
Gpr137	1022	0.0145939	0.112111	0.0333882	-0.00963401
Mal	1023	0.0146706	0.11262	0.0263598	0.00418889
Socs1	1023	0.0425055	0.252811	-0.362248	0.0838116
Dip2b	1024	0.014693	0.112712	0.0550559	0.0285801
Plcd3	1024	0.042563	0.252994	-0.00231774	0.0496296
Mgea5	1025	0.0147549	0.113027	0.10191	0.0600292
Zbtb17	1025	0.0332318	0.211713	0.0437394	0.0515129
Ash1l	1026	0.0427209	0.253376	0.0521007	0.107702
2700049A03Rik	1027	0.0430812	0.254888	-0.0228872	0.0218813
Styk1	1028	0.0430867	0.254888	0.00618967	0.0370472
Bcr	1030	0.0152889	0.116588	0.0898936	0.0769313
Nup98	1030	0.0432625	0.255747	0.0247927	0.0558062
Dhrs7	1031	0.0436079	0.257367	-0.0249328	0.0611771
Map7	1033	0.0155555	0.118406	0.0667108	-0.0492074
Anxa11	1034	0.0315354	0.203663	0.072919	0.0841825
Galnt4	1035	0.0156509	0.118964	0.0295899	0.00762163
Ssh3	1036	0.0157516	0.119646	0.0362231	-0.0148425
Crem	1036	0.0445877	0.26215	-0.0331941	0.0578409
Arf3	1037	0.0158087	0.119911	0.0754524	-0.0854526
Pdzrn3	1038	0.0158671	0.120102	0.0470279	-0.0649248
8030462N17Rik	1038	0.0448803	0.263584	-0.00504878	0.0275531
Bckdha	1039	0.0159213	0.120344	0.0628614	-0.00402021
Fbxl5	1040	0.0159416	0.120413	0.0984835	-0.0774651
Frg1	1041	0.0162336	0.122277	0.115319	-0.0548454
Btd	1042	0.0162866	0.122591	0.0495806	-0.00138659
Slc25a25	1042	0.0457335	0.267289	-0.00993158	0.0432554
1810037I17Rik	1043	0.0463358	0.270517	-0.577079	0.108528
Gns	1044	0.0163569	0.123035	0.0734727	-0.0598955
Rab6b	1045	0.016385	0.123119	0.0464956	0.0343683
Syt8	1045	0.0473421	0.274909	0.0240764	0.087762
Emp2	1046	0.0164065	0.123119	0.124057	0.0227591
Apln	1046	0.0473731	0.274942	-0.0359896	0.0244364
Avl9	1047	0.0164702	0.123372	0.0779929	0.0160039
Efnb1	1047	0.047802	0.276986	-0.0364068	0.0568477
Fbxl20	1048	0.0166378	0.124347	0.0471145	-0.0446531
Cyb5a	1049	0.0166462	0.124347	0.110892	0.0307898
Erbb2	1050	0.0166952	0.124627	0.0490649	-0.000313068
Mgme1	1050	0.0480706	0.278393	-0.0353232	0.0287046
Pdgfra	1052	0.016901	0.125989	0.0298593	0.0104072
Car2	1052	0.0481856	0.27891	0.00832082	0.0485699
Chac1	1053	0.0482785	0.279231	-0.167195	0.0342324
Hif1an	1054	0.0172254	0.128055	0.0534039	0.0310739
Klrg2	1054	0.0482927	0.279231	0.0102499	0.0313051
Myo1d	1055	0.0173123	0.128532	0.0318244	0.0175045
Arid1a	1055	0.0484152	0.27979	-0.00298157	0.0795595
Rnf216	1056	0.0173134	0.128532	0.0872458	0.0587835
Fbxl15	1056	0.0485201	0.280097	0.00419373	0.0654591
Eef2	1057	0.0174081	0.129147	0.108964	0.0608005
Egr2	1057	0.0487039	0.280709	-0.0092318	0.0304198
Pum2	1058	0.0174524	0.129387	0.106429	0.0725425
Tnks	1059	0.0174658	0.129397	0.0772097	0.00653991
Dmac2	1059	0.0488758	0.281128	0.0255025	0.0330272
Srsf6	1060	0.017518	0.129696	0.120454	-0.0194193
Tmem55b	1060	0.0488806	0.281128	-0.0371223	0.071746
Desi2	1061	0.0175601	0.129846	0.124446	0.0619681
Snhg6	1061	0.0489348	0.281141	-0.114529	0.0952798
Acin1	1062	0.0177496	0.131141	0.115751	-0.0634389
St13	1063	0.0178289	0.131637	0.1158	0.0586962
Fam214a	1063	0.049371	0.282867	-0.00884463	0.0217183
Cxadr	1064	0.0179381	0.132173	0.0895196	-0.0374493
Hspb6	1064	0.0494182	0.282867	0.0187617	0.0311577
Rilpl1	1065	0.0180304	0.132672	0.028851	-0.00199279
4931406P16Rik	1065	0.0494952	0.283159	0.0380282	0.0631791
Tbl1x	1066	0.0180571	0.132748	0.09214	-0.060996
Ccdc186	1066	0.0498001	0.284452	0.0290283	0.0920255
Pcgf3	1067	0.0181892	0.133478	0.0888111	-0.027545
Prc1	1067	0.050182	0.286096	-0.486632	0.0391424
Ctnnal1	1068	0.0182477	0.133726	0.0966659	-0.0419981
Trim36	1068	0.0503403	0.28663	0.00394765	0.0201427
Prrx2	1069	0.0182956	0.133986	0.0299636	0.017647
Cdon	1070	0.0183412	0.134229	0.0335856	0.0217407
Yipf2	1072	0.0184072	0.134609	0.0553371	0.0195104
Osr2	1072	0.0509867	0.289245	-0.0124255	0.056942
Acox1	1073	0.0253938	0.172328	0.052512	0.0487516
Kmt5b	1074	0.0184916	0.135056	0.0898798	0.0410031
Ilvbl	1075	0.0185637	0.1354	0.0432507	-0.0198575
Got1	1075	0.0517136	0.292602	-0.120828	0.0626387
Mettl6	1076	0.0518242	0.292922	0.00863402	0.0696653
Eps15l1	1077	0.0186287	0.135782	0.0675401	-0.0577296
Gm38246	1077	0.0518776	0.293071	0.00967677	0.01397
Atg2a	1078	0.0261653	0.176347	0.0433906	0.042669
Vdr	1079	0.0187374	0.136351	0.0506825	-0.0115541
Supt6	1079	0.0523887	0.295495	0.0295639	0.0924978
Pfkm	1080	0.0188514	0.136945	0.0281206	0.0219209
Pcgf5	1080	0.0525808	0.29627	0.033577	0.0943661
Srgap3	1081	0.0189431	0.137519	0.0443352	-0.000942056
Nr2c2	1082	0.0189757	0.137663	0.063963	0.0117484
Cyth1	1083	0.0190076	0.137712	0.0343207	-0.00315406
4732440D04Rik	1083	0.0528926	0.297562	0.0236371	0.0320905
Kdm2b	1084	0.0190446	0.137797	0.0754083	-0.0439175
Olfr920	1085	0.0190474	0.137797	0.0493756	-0.000287285
Usp49	1085	0.0530378	0.297914	0.00531733	0.0260283
Gchfr	1086	0.0532071	0.29871	-0.124854	0.0377543
Klhl15	1087	0.019234	0.138827	0.0391461	0.00103486
AI480526	1087	0.0532691	0.298748	0.00350623	0.012026
Zfp871	1088	0.0192974	0.138827	0.0615116	0.0401309
Dpp7	1088	0.0421278	0.25179	0.019143	0.0213601
Epb41l5	1089	0.0192988	0.138827	0.0459348	0.0314293
Spats2l	1089	0.0534781	0.29961	-0.0102112	0.0163508
Mfsd6	1090	0.0193073	0.138827	0.0559538	0.0294078
Nit1	1090	0.0537677	0.300766	-0.0176856	0.0396245
Chic2	1091	0.0329301	0.210387	0.0922411	0.103025
1110035H17Rik	1092	0.0540133	0.3014	0.00770844	0.0174807
Gpc1	1093	0.0196425	0.140802	0.0771846	0.0571032
Arhgap31	1093	0.0544111	0.303268	-0.0326495	0.0371819
Naa16	1094	0.0551022	0.306488	0.0322814	0.0561707
Erp44	1095	0.0201658	0.144171	0.10153	0.0864969
Ehd4	1095	0.0552902	0.307218	0.0397039	0.109676
Ubl5	1096	0.055544	0.30847	-0.0439019	0.102815
Snx14	1097	0.0555944	0.308592	0.0170862	0.0425654
Uaca	1098	0.0203407	0.14523	0.103148	0.0614133
Fam129b	1098	0.0256205	0.17354	0.0911136	0.0847114
Fbrs	1099	0.0205178	0.146301	0.0480266	-0.0282029
D6Wsu163e	1100	0.0565491	0.312449	-0.00183943	0.0163472
Sppl3	1101	0.0206351	0.146944	0.0756143	0.036509
Nup153	1101	0.057049	0.31489	0.0191524	0.0767725
Prkcg	1102	0.0571176	0.315107	-0.0118649	0.0154898
Mob3b	1103	0.0208808	0.148395	0.0623921	0.00102724
Nemp1	1103	0.0577281	0.317888	-0.0465822	0.0199364
Hexa	1104	0.0210125	0.149043	0.0414762	-0.0337258
Rab43	1104	0.0230029	0.158892	0.0364261	0.0321538
Nek7	1105	0.0211706	0.14987	0.0935769	-0.149866
Adss	1105	0.0578629	0.318408	0.0744809	0.107626
Tet2	1106	0.0212429	0.150191	0.0467035	0.000130128
Foxq1	1106	0.0580447	0.319246	0.00361401	0.0258707
Ube2j1	1107	0.0212576	0.150191	0.0966937	0.0334797
Rab40c	1107	0.0581059	0.31942	0.0231105	0.0433302
Tbc1d23	1108	0.0213104	0.150269	0.0486201	0.0067268
Muc1	1108	0.0527741	0.297204	0.0226242	0.0279242
Aff4	1109	0.0213655	0.150557	0.111818	0.0705397
Polr1d	1109	0.0582964	0.320142	-0.110278	0.0988654
Chmp1b	1110	0.0214702	0.151003	0.0750002	0.0254772
Otud7b	1110	0.0588172	0.322211	-0.0281583	0.0694409
Herc4	1111	0.0295425	0.193916	0.0601554	0.0600694
Tmem165	1112	0.0216818	0.151997	0.108793	-0.059825
Dnttip2	1112	0.0592944	0.323979	0.0140768	0.10013
Canx	1114	0.0217294	0.152232	0.118822	0.0470447
AI314180	1114	0.0593793	0.324212	0.0459466	0.0735129
Map4k3	1116	0.0219094	0.153196	0.049445	0.0325255
Ugp2	1116	0.0597343	0.325725	-0.055188	0.068379
Zfp407	1117	0.0604952	0.32921	0.0049287	0.032807
Smad1	1118	0.0219457	0.15324	0.0916081	0.0813748
Man2b2	1119	0.0219736	0.15324	0.0279638	0.00097346
Spata2	1119	0.0606137	0.329471	-0.0126095	0.0391746
1190002N15Rik	1120	0.0219864	0.15324	0.0254104	0.00437549
Acp5	1120	0.0606179	0.329471	0.0544755	0.074123
Bmpr1a	1121	0.0220572	0.153634	0.0743775	0.0210962
Ube2g2	1121	0.0606343	0.329471	-0.0260772	0.0798328
Rab2b	1122	0.022117	0.153869	0.0355387	0.0112246
Mef2d	1122	0.0609785	0.331175	0.0178254	0.0469711
Aff1	1123	0.0612239	0.332008	0.0182931	0.0553719
Adgre5	1124	0.0222587	0.154441	0.0333874	0.00468114
Igf2bp3	1124	0.0615656	0.333527	0.0316791	0.0415365
Tle4	1126	0.0224997	0.155919	0.0397586	0.00516009
Ist1	1127	0.0225005	0.155919	0.0958257	0.0604245
Prdm1	1127	0.0623013	0.33667	-0.0268693	0.0168613
Vkorc1l1	1128	0.0227007	0.157206	0.0679602	0.0253528
Pld2	1128	0.0624614	0.337366	0.0181438	0.0293529
Hspg2	1129	0.0227571	0.157495	0.0804321	-0.0376083
Cryba4	1129	0.0626955	0.338293	-0.00994504	0.0238383
Phka1	1130	0.0632914	0.340659	0.00889518	0.0203913
Steap4	1131	0.0229262	0.158565	0.0233722	-0.0825513
Phf19	1131	0.0637211	0.342462	-0.0378574	0.0131996
Bzw1	1132	0.0229714	0.158775	0.116858	-0.0150547
BC003331	1132	0.0649349	0.348393	-0.0484969	0.0538785
Myo5a	1133	0.0649536	0.348393	-0.027118	0.067043
Akirin1	1134	0.0652958	0.349126	-0.0802209	0.0779299
Ktn1	1137	0.0234301	0.161636	0.111664	0.0348941
Tnfsf9	1138	0.0660034	0.351585	0.0218621	0.030011
Mkrn1	1139	0.0239951	0.165218	0.0928068	-0.0281604
Rufy3	1139	0.0330863	0.211035	0.0560972	0.0572022
Add3	1140	0.0242802	0.166688	0.0393575	0.0347096
B4galt1	1141	0.024035	0.165388	0.0863305	0.0502362
Zeb2	1142	0.066848	0.354687	0.0221195	0.0640804
Ambra1	1143	0.0242541	0.166683	0.0485986	0.0189175
Ubxn2a	1143	0.0671718	0.355534	0.0243026	0.0742469
Peak1	1144	0.0434362	0.256494	0.0781405	0.0892146
Esf1	1145	0.0244783	0.167692	0.104913	-0.0628301
Zfp385a	1145	0.0678564	0.358807	0.0125275	0.0149753
Phf8	1147	0.0245562	0.168119	0.0366683	0.000424172
Mob3a	1147	0.0680684	0.359188	0.0323828	0.0530211
Fam160b1	1148	0.0245737	0.168133	0.0583047	-0.0214292
Mllt11	1148	0.0681379	0.359242	-0.0433784	0.0647388
Phf21a	1149	0.0683385	0.359949	0.0338011	0.0450259
Phyh	1150	0.0247615	0.169203	0.079324	-0.0290237
Grn	1150	0.0341799	0.215095	0.103758	0.105071
Gm26870	1151	0.0686861	0.361604	0.0037557	0.0155292
H19	1152	0.0249079	0.170097	0.120992	-0.142131
Dock7	1153	0.0250752	0.171023	0.0855819	0.0257657
M1ap	1153	0.0688234	0.362151	-0.0406652	0.045726
C1qc	1154	0.0693461	0.364193	0.0137653	0.0216947
Etl4	1155	0.0251782	0.171617	0.0427719	-0.0123856
Mprip	1155	0.0550871	0.306488	0.0692597	0.0848465
Tpbg	1156	0.0252861	0.171812	0.0996545	-0.0999722
Pcbp2	1156	0.0694241	0.364426	-0.0749442	0.0967212
Gm15987	1157	0.0253367	0.172048	0.0418037	-0.0581237
Strn3	1157	0.0696018	0.365005	0.0437158	0.0872802
D030056L22Rik	1158	0.0650072	0.348508	0.0750356	0.0972808
Farp1	1159	0.0703622	0.367795	0.0274239	0.0447179
March6	1160	0.0255159	0.173047	0.057151	-0.0198259
Zfp697	1160	0.070805	0.369346	-0.00250695	0.0241293
Dio2	1161	0.0256119	0.17354	0.0157096	0.00818939
Plk4	1161	0.0710995	0.370704	-0.464803	0.0344998
Brca1	1162	0.0716699	0.373081	-0.10851	0.0107558
Dnajc5	1163	0.0257117	0.173939	0.0978347	0.0281415
Cacfd1	1164	0.025754	0.174117	0.0539447	0.00481773
Qpctl	1164	0.0721043	0.374679	0.0210501	0.0284658
Spsb1	1165	0.0260249	0.17562	0.0714692	-0.0378117
Tspan3	1165	0.0722971	0.375242	-0.0144329	0.0992819
Gadd45b	1166	0.0262162	0.17658	0.111503	0.0757445
Per1	1166	0.0723629	0.375242	-0.0172948	0.0257472
Hdlbp	1167	0.0263125	0.177008	0.112731	0.0382968
Ptpn9	1168	0.0264001	0.177487	0.0640729	0.0344021
Denr	1168	0.0724949	0.375627	0.0378444	0.0963944
Sirt2	1169	0.0265562	0.178426	0.0678199	-0.0565243
Gigyf2	1170	0.0726843	0.376428	-0.0363563	0.0692396
Ssfa2	1171	0.072743	0.376485	0.00237569	0.0350499
A230072E10Rik	1172	0.0267785	0.179696	0.0187961	0.00876643
Atp1b3	1172	0.0727648	0.376485	-0.0136857	0.0910907
Znrf2	1173	0.0268339	0.179957	0.0497547	0.0270762
Map3k5	1173	0.0269837	0.180625	0.0560117	0.0484732
Gpat4	1174	0.0268926	0.180239	0.0994926	0.0411875
2900089D17Rik	1174	0.0730691	0.37753	0.00807369	0.0189904
Padi4	1175	0.0269785	0.180625	0.108351	-0.152936
Mb	1175	0.0730715	0.37753	0.0170835	0.0217035
Txndc11	1176	0.0304619	0.198854	0.0529071	0.0472155
Atp13a3	1177	0.0732403	0.378222	0.00774355	0.0677684
Tcf4	1178	0.0272085	0.182018	0.105253	-0.0298841
Tmem38a	1178	0.0732912	0.378304	0.00616724	0.0260911
Acer3	1179	0.0274162	0.183294	0.072232	-0.00879095
Foxm1	1179	0.0734726	0.378879	-0.114821	0.0164981
Zfp933	1180	0.0274875	0.183544	0.0190096	-0.00715616
Rybp	1180	0.0368713	0.227146	0.0729695	0.0728312
Mnt	1181	0.0275394	0.183777	0.0500087	0.00342889
Gpn2	1181	0.0738438	0.380091	0.00656524	0.0373371
Rab32	1182	0.0275604	0.183804	0.0696563	-0.0071004
Hes1	1182	0.0738832	0.380091	0.0527425	0.0908809
Zhx2	1184	0.0276674	0.184325	0.0334957	0.0137886
Kcnn4	1185	0.0276725	0.184325	0.127946	-0.0532639
Atg9b	1185	0.0744947	0.38251	0.00493107	0.0249815
Lpcat3	1186	0.0277897	0.184991	0.0538653	-0.00690593
Dnajc13	1186	0.037382	0.229638	0.0601899	0.058699
Gtf3c4	1187	0.0278398	0.185211	0.0641992	0.0220839
Pim2	1188	0.0752862	0.385842	0.00659291	0.0207848
Gm16536	1189	0.0279974	0.18593	0.019637	0.0142653
Zyx	1189	0.0753993	0.385874	-0.0933168	0.0874181
Ppm1j	1190	0.0280149	0.18593	0.0388308	0.00667067
A130051J06Rik	1190	0.0754637	0.38602	0.00290964	0.0253315
Cdc6	1191	0.0759579	0.387815	-0.105697	0.00961693
Pacs2	1192	0.0280339	0.18593	0.0449846	-0.0204409
Pik3r1	1193	0.0281306	0.186458	0.053491	-0.00676326
Drc3	1193	0.0766072	0.390394	0.0110377	0.0159779
Cdc45	1194	0.0770142	0.390993	-0.103407	0.0359772
Ap3s1	1195	0.028539	0.188933	0.100332	0.087694
Elf3	1195	0.0775266	0.392859	-0.00367676	0.03948
Arhgef5	1196	0.0288776	0.19058	0.0928119	-0.00730102
Dhx15	1196	0.0776422	0.393261	0.0361235	0.078333
Ubfd1	1197	0.0288912	0.19058	0.0821494	0.0479774
Adam19	1197	0.0778751	0.394072	-0.030233	0.0143525
Eps8l1	1198	0.0288933	0.19058	0.0169796	0.0105089
Khk	1199	0.0289437	0.190796	0.0420819	0.0302219
Smcr8	1199	0.0786483	0.397056	0.0141001	0.0332886
Zcchc7	1200	0.0289666	0.190831	0.0752647	0.00391828
Zfp212	1200	0.0787137	0.397195	-0.003447	0.0317321
Nmnat2	1201	0.0394992	0.240461	0.045182	0.0442554
BC005624	1202	0.0292078	0.192302	0.0850863	-0.00480454
Pnpla6	1202	0.0791838	0.398405	0.0169358	0.0259335
Myo9b	1203	0.0292305	0.192335	0.0642927	0.0435842
Arl15	1203	0.0792199	0.398405	0.010626	0.0176705
Tapt1	1204	0.0292612	0.19242	0.0449588	0.0157142
Rrm2b	1204	0.0792466	0.398405	-0.022449	0.0418976
Slc30a4	1205	0.0294831	0.193644	0.0831902	0.0175529
Atg7	1206	0.0795727	0.399859	0.0116322	0.0357263
Kri1	1207	0.029571	0.193986	0.0501188	-0.00171807
Rab7	1207	0.0796327	0.399909	0.0188063	0.0939693
Odaph	1209	0.0296654	0.19438	0.0506102	-0.0162495
Arhgef19	1210	0.0300539	0.196793	0.029302	0.00265614
Tex30	1210	0.0805028	0.403409	-0.204057	0.0590164
Snx29	1211	0.0300817	0.196793	0.0203054	0.000665786
Gm20324	1211	0.0806172	0.403727	-0.0013703	0.0134035
Cdip1	1212	0.0300898	0.196793	0.0625611	0.0139889
Ints2	1212	0.0816275	0.406972	0.0140811	0.0441369
Fxr1	1213	0.081761	0.406991	-0.0720984	0.0832352
Tcea3	1214	0.0304644	0.198854	0.045452	-0.0264619
2900093K20Rik	1214	0.081857	0.406991	0.00129115	0.0206045
Tmem63b	1215	0.03049	0.198854	0.0694886	0.0148265
Dclre1b	1215	0.0819716	0.407374	-0.0332957	0.0288115
Foxc1	1216	0.0307768	0.200438	0.065293	0.0298075
Ostf1	1216	0.0410927	0.247379	0.0966518	0.0907481
Ninj1	1217	0.0411222	0.247419	0.0883399	0.0870153
4932438A13Rik	1218	0.0308794	0.200967	0.0649578	-0.0274771
Ppp1r37	1219	0.0308952	0.200967	0.0497455	0.00931618
Pla2g6	1219	0.0831265	0.411454	0.0154673	0.0279015
Ccndbp1	1220	0.0309723	0.201348	0.0698004	0.0292508
Snx7	1220	0.0831347	0.411454	-0.0577377	0.0348953
Zfp316	1221	0.0310769	0.201831	0.0266994	0.0174254
Amfr	1221	0.0832813	0.411803	0.0322809	0.0766826
Zdhhc9	1222	0.0311624	0.202098	0.0369952	0.0262942
Zfp326	1223	0.0572001	0.315402	0.0810588	0.0946759
Rps21	1224	0.0312907	0.202809	0.0924074	0.0437891
Sned1	1225	0.0313817	0.203277	0.0228031	0.000762691
Mt2	1225	0.0398502	0.242053	0.14598	0.127275
Piezo2	1226	0.0314381	0.203398	0.0463455	0.0261892
Crtc1	1226	0.0418523	0.250558	0.029551	0.0317302
Zfp704	1227	0.0315294	0.203663	0.04227	-0.0419353
Vamp4	1227	0.08414	0.415101	-0.0177973	0.0397831
Nfia	1228	0.0316118	0.203913	0.0595231	-0.00679176
Osr1	1228	0.0842967	0.415345	0.0153119	0.0243618
Tnfrsf19	1229	0.031851	0.205005	0.0283841	0.0148754
Stt3b	1229	0.0464925	0.27114	0.0614168	0.0678451
Tcf25	1230	0.0318568	0.205005	0.105326	0.0445574
Slc27a1	1230	0.0422277	0.251958	0.045148	0.042038
Sos2	1231	0.0322433	0.207029	0.0536332	-0.0064617
Nme5	1232	0.0322468	0.207029	0.0211008	-0.00709922
Serhl	1232	0.0847673	0.416487	-0.0149009	0.0422665
Zfand3	1233	0.0322669	0.207029	0.0711785	-0.00219988
Pla2g12a	1233	0.084946	0.417015	-0.13753	0.0484245
Camk2n1	1234	0.0326163	0.208775	0.0524935	-0.0123588
Tmed3	1234	0.0851474	0.417407	0.00108342	0.0842763
Por	1235	0.0326524	0.208882	0.0881325	0.0139679
Mmp19	1235	0.0853832	0.417995	0.0124967	0.0153851
Fcgrt	1236	0.0328717	0.210161	0.0195555	0.0164714
Trim47	1236	0.0855159	0.418238	0.0589151	0.0942919
Golga2	1237	0.0329653	0.210387	0.0422715	0.0292729
Scfd2	1237	0.0856385	0.418238	0.00841792	0.0128992
Psmc3	1238	0.0856646	0.418238	-0.200435	0.0918084
Gabpa	1239	0.085725	0.418327	0.0253463	0.0439767
Afap1	1240	0.0335971	0.213287	0.0976455	0.0192442
Zfp868	1240	0.0507156	0.28816	0.0259832	0.0291502
Epb41l1	1241	0.0336723	0.21355	0.0519516	0.0139853
Brox	1241	0.0860632	0.419427	0.0310285	0.0560872
Fmnl2	1242	0.0337241	0.213593	0.0648424	-0.0236949
Micu3	1242	0.0861205	0.419517	0.0187541	0.029164
Nucb1	1243	0.0337801	0.213822	0.0756523	-0.0384728
Wdr33	1244	0.086471	0.420657	0.0104395	0.0509133
P3h1	1245	0.0338279	0.214	0.0277659	0.00481156
Epc2	1245	0.0683373	0.359949	0.0508324	0.0618436
Ccdc86	1246	0.0339725	0.214626	0.0974124	-0.0721739
Impact	1246	0.0866632	0.421024	0.0164461	0.0372553
Zbtb39	1247	0.0340107	0.214626	0.0304249	0.0207723
Bricd5	1248	0.0340302	0.214626	0.0185674	0.00475716
Wfs1	1249	0.0342406	0.215227	0.0246647	0.00420298
Epha4	1249	0.0870773	0.422804	0.00502578	0.0111751
Rhpn2	1250	0.0342926	0.215428	0.0216649	0.00158063
Nav2	1251	0.0343888	0.215782	0.112482	-0.0510446
Tigd5	1251	0.0873185	0.423638	0.00891998	0.0129934
Clcn4	1252	0.0344631	0.216033	0.0544784	0.0218008
Usp2	1252	0.0873858	0.423747	0.00642624	0.0139646
Shoc2	1253	0.0344687	0.216033	0.0829398	0.0144019
Pithd1	1253	0.0874585	0.423747	-0.207127	0.0495457
Vsig10	1254	0.0344897	0.21604	0.060103	-0.0314101
Mirt1	1254	0.0876244	0.424171	-0.131106	0.0489838
Nos2	1256	0.0347448	0.217512	0.108882	-0.0226888
Nup54	1256	0.0878074	0.424677	0.0365798	0.0705091
Calcoco1	1257	0.0347822	0.21762	0.0287521	-0.00159628
Arih2	1257	0.0477493	0.276938	0.0561652	0.0612275
Slc12a2	1258	0.0348062	0.217644	0.0599033	0.0301288
Eif2d	1258	0.0889438	0.429176	-0.0678975	0.0522142
Rbm15b	1259	0.0348335	0.21769	0.0640989	0.00793841
Gm27029	1259	0.0898031	0.432589	-0.0411817	0.0120406
Ypel3	1260	0.0348865	0.217895	0.0495931	-0.0223353
Zscan26	1261	0.0352727	0.21954	0.0307898	-0.00812268
Rbm27	1261	0.0900289	0.433099	0.00153922	0.0802957
Stat3	1262	0.0354734	0.220404	0.0923132	-0.0581788
Wdr27	1263	0.0356083	0.221	0.0249639	0.009255
Acadvl	1264	0.0357112	0.221512	0.0776342	-0.0288876
Pacs1	1265	0.0357319	0.221514	0.0402693	0.0199847
Ube3b	1265	0.0913363	0.43772	-0.00455606	0.0317753
Smpd1	1266	0.0360341	0.223052	0.044616	0.00409811
Crebrf	1266	0.0552456	0.307128	0.0488759	0.0540113
Mon2	1267	0.0360419	0.223052	0.0642117	0.0377145
Pkp2	1267	0.0914784	0.437774	0.0331143	0.0484782
Irgq	1268	0.0361888	0.223705	0.0345851	-0.00487758
Cdk11b	1268	0.0915431	0.437774	-0.0701122	0.0731297
Il17re	1269	0.0362848	0.224171	0.0286157	-0.0285699
Ankrd1	1269	0.091615	0.437774	-0.124781	0.0759475
Rhot1	1270	0.0363714	0.224577	0.0686069	0.00721523
Lin7c	1270	0.0916228	0.437774	0.0393216	0.0639824
Acap3	1271	0.0916425	0.437774	0.00558099	0.0345125
Sun2	1273	0.0371148	0.228386	0.0379885	0.0159449
Serpinb2	1273	0.053957	0.301357	0.020061	0.02151
Zfp335	1274	0.0924484	0.440947	0.00486955	0.0301571
Rnf217	1275	0.0372482	0.229076	0.0552024	0.023837
Dhx34	1275	0.0924751	0.440947	-0.0140349	0.0192796
Plpbp	1276	0.0928077	0.441561	-0.0806401	0.060168
Gla	1277	0.0929886	0.442033	0.00747073	0.016995
Bod1l	1278	0.0373386	0.229502	0.0978994	-0.13137
Pbld1	1278	0.0930624	0.442094	-0.173347	0.0254829
Hacd3	1279	0.0376406	0.231096	0.050082	-0.0400972
Rrad	1279	0.093325	0.442702	-0.134323	0.0353811
Pfkfb3	1280	0.0377967	0.231791	0.0350134	-0.0354715
Parvb	1280	0.0933895	0.442772	-0.0137885	0.0204321
Dync1li1	1281	0.0379013	0.23217	0.0778756	-0.0113494
Ywhaq	1282	0.0380307	0.232699	0.106737	-0.0204944
Itsn2	1283	0.0384433	0.234808	0.0824801	0.052329
Ttc17	1284	0.0384622	0.234808	0.0333104	0.0174197
Zbtb21	1284	0.0947382	0.447888	0.00655384	0.044826
Prdm4	1287	0.0392308	0.239366	0.0597243	0.00414074
Chst11	1287	0.0956355	0.45105	-0.0060003	0.0337908
Rpl15	1288	0.0392779	0.239499	0.0660283	0.0124686
Clspn	1288	0.0958621	0.451625	-0.193881	0.0158284
Usp43	1289	0.0394847	0.240461	0.0714378	0.0490535
Emp3	1289	0.0958826	0.451625	-0.261891	0.103436
Pdgfb	1290	0.0396938	0.241374	0.0702325	0.0518995
Brd3	1291	0.0397556	0.241614	0.0871608	0.000829815
Ndufv3	1291	0.0959925	0.451749	0.0603921	0.0873769
Fbrsl1	1292	0.0960509	0.451827	-0.00503483	0.0433116
Emb	1293	0.0961947	0.452111	-0.000768378	0.0211751
Arpc3	1295	0.0402984	0.244091	0.110431	0.0455785
Cyp51	1295	0.0966599	0.453706	-0.0368975	0.0610121
Acap1	1296	0.0968295	0.454141	-0.104785	0.0435582
Ccnt2	1297	0.0404615	0.24488	0.0815173	0.0282784
Irx1	1297	0.0968511	0.454141	-0.0745776	0.0433957
Cyb5r3	1298	0.0968785	0.454141	-0.0918536	0.0843263
Irx3	1299	0.0407535	0.24626	0.0522229	0.0357777
Ufd1	1299	0.0969875	0.454448	0.00111574	0.0632847
Znrf1	1300	0.0407704	0.24626	0.0872291	-0.0495031
Pls3	1300	0.0972978	0.455121	0.03281	0.0631974
Poldip3	1301	0.0409247	0.246779	0.0641415	0.0487741
Spin4	1301	0.0488571	0.281128	0.0224862	0.0208633
[truncated: 8,825 more rows]

## Sheet: 3-MHC II high
	Top	p.value	FDR	logFC.1	logFC.2
Clu	1	2.14316e-77	2.31975e-73	1.45879	0.049526
Mtap	1	1.08752e-21	4.52745e-19	0.0691643	0.578546
Cp	2	1.34924e-69	7.30207e-66	1.09498	0.10243
Arl4c	2	1.253e-18	3.66554e-16	0.539541	0.561349
Lcn2	3	4.19381e-67	1.51313e-63	1.52352	0.704873
Cebpd	3	9.2818e-44	1.67444e-40	0.924468	0.60376
Fn1	4	5.41485e-58	1.46526e-54	1.09956	-0.107033
Prdx2	4	5.8321e-14	9.28333e-12	0.290391	0.384186
Cebpb	5	1.87741e-52	4.06421e-49	1.05841	0.230632
Ndufa4	5	6.01442e-14	9.43479e-12	0.0261073	0.426083
C3	7	3.90617e-35	6.04006e-32	0.70873	-0.158715
Polr2e	7	3.17661e-13	4.64643e-11	0.0535175	0.396006
Epcam	8	2.09061e-33	2.8286e-30	0.751395	0.150768
Bcl3	8	5.79862e-13	7.94484e-11	0.2268	0.26875
H2-D1	9	6.42958e-33	7.73264e-30	0.447269	-0.086316
Dok1	9	2.30409e-12	2.96899e-10	0.0215909	0.281779
Pdgfrl	10	1.04301e-32	1.12896e-29	0.649573	0.0734798
Hmgb1	10	2.75772e-12	3.43098e-10	-0.765658	0.403233
Ltbp3	11	4.63344e-32	4.55931e-29	0.583507	0.00500632
Dctpp1	11	3.02913e-12	3.72583e-10	-0.538475	0.318345
Tmem59	12	5.19584e-32	4.68665e-29	0.608944	-0.0266195
Tuba1b	12	9.09831e-12	1.04766e-09	-1.12675	0.434783
Tmem176b	13	3.0015e-31	2.48786e-28	0.732499	0.274303
Ndufb9	13	2.49145e-11	2.75178e-09	-0.400235	0.349335
Cd9	14	3.21785e-31	2.48786e-28	0.641442	-0.152331
Socs3	14	2.69383e-11	2.94262e-09	0.0417192	0.371927
Fxyd3	15	1.79357e-29	1.29424e-26	0.701873	0.0605678
Dbnl	15	4.15424e-11	4.32361e-09	0.00613781	0.271937
Tmem176a	16	1.96536e-29	1.32957e-26	0.654364	0.29514
Zfp422	16	5.43748e-11	5.39957e-09	0.13602	0.191577
Maged1	17	3.21681e-27	2.04816e-24	0.574166	0.140317
Fam60a	17	8.58909e-11	8.15511e-09	0.212339	0.266438
Tmsb4x	18	6.98039e-27	4.19754e-24	0.741765	0.247656
Limd2	18	8.99277e-11	8.46415e-09	-0.16618	0.26836
Anxa1	19	1.25034e-26	7.12297e-24	0.605705	-0.407209
Abcc3	19	3.14566e-20	1.09834e-17	0.317064	0.241996
Krt14	20	1.49526e-26	8.09233e-24	0.907218	0.187784
Cdc26	20	1.07626e-10	9.95679e-09	0.16539	0.308199
Malat1	21	5.38626e-26	2.77623e-23	0.516618	-0.473533
Galk1	21	1.26334e-10	1.12085e-08	-0.239351	0.323073
Pfdn5	22	4.5596e-25	2.24332e-22	0.557585	0.061313
Tmem238	22	1.44945e-10	1.26523e-08	-0.278965	0.358168
Csf3	23	3.04389e-24	1.43248e-21	0.965338	-0.11268
Ndufs4	23	1.63381e-10	1.41475e-08	-0.109543	0.344006
Pde4b	24	8.26477e-23	3.72741e-20	0.369759	0.147189
Mrpl21	24	2.01819e-10	1.72007e-08	-0.11052	0.32518
Ext1	25	5.75581e-22	2.49204e-19	0.39356	0.0293934
Rbp1	25	1.13148e-10	1.0379e-08	0.372988	0.387966
Crlf1	26	5.2993e-21	2.12443e-18	0.470048	-0.0986745
Psmb8	26	2.52217e-10	2.06818e-08	-0.109607	0.333631
Spint2	27	7.01992e-21	2.7137e-18	0.378918	0.150641
P2ry6	27	9.42824e-11	8.79753e-09	0.297278	0.307461
Cst3	28	8.5296e-21	3.1836e-18	0.468344	-0.196262
Fam136a	28	2.9184e-10	2.33991e-08	-0.00543183	0.253373
Cxcl5	29	1.94432e-20	7.01511e-18	0.556381	0.100046
Rraga	29	3.11049e-10	2.45751e-08	0.20829	0.241521
Hist1h1e	30	3.24186e-10	2.54275e-08	-0.592908	0.185466
Rps9	31	3.65751e-20	1.23715e-17	0.279827	0.0377105
Rrp1b	31	4.37833e-10	3.3374e-08	0.24107	0.290897
Rpl10	32	1.42401e-19	4.67076e-17	0.332672	-0.016648
Gcnt2	32	2.10185e-11	2.34541e-09	0.26705	0.266307
Itm2b	33	4.49634e-19	1.43142e-16	0.453738	-0.13443
Ndufb7	33	4.53593e-10	3.43335e-08	-0.0469611	0.34099
Srrm2	34	7.76499e-19	2.40138e-16	0.398984	-0.0189425
Mrps24	34	5.23191e-10	3.87878e-08	-0.278027	0.343992
Tm4sf1	35	9.80811e-19	2.94897e-16	0.516088	-0.242043
Mettl26	35	1.53712e-09	1.09459e-07	0.19144	0.262922
Psma4	36	2.63284e-09	1.75913e-07	-0.0592057	0.339504
Ogt	37	4.99142e-18	1.42177e-15	0.391178	0.113195
Cbx1	37	2.89589e-09	1.91129e-07	-0.116683	0.313179
Ahnak	38	5.87107e-18	1.62945e-15	0.411323	-0.185335
Nek6	38	3.06595e-09	1.99915e-07	0.134805	0.224694
Fas	39	7.30664e-18	1.97718e-15	0.350542	0.0446771
Exosc4	39	3.25727e-09	2.09861e-07	0.0982041	0.22959
Wfdc2	40	1.04086e-17	2.74787e-15	0.49107	0.173161
Mrpl34	40	4.25495e-09	2.72518e-07	-0.0437268	0.267605
Ptprk	41	1.51443e-17	3.9029e-15	0.381872	0.237176
Ifi47	41	5.54194e-09	3.48756e-07	0.0142023	0.305522
Ctsh	42	2.70954e-17	6.82048e-15	0.442268	-0.115258
Tubb5	42	5.73046e-09	3.56474e-07	-0.681347	0.41983
Fau	43	5.76519e-17	1.41824e-14	0.253545	-0.0499539
Dnajc15	43	5.78013e-09	3.57509e-07	-0.200148	0.289471
Map1lc3a	44	6.19528e-17	1.49017e-14	0.459805	-0.287184
Jagn1	44	6.06963e-09	3.73282e-07	0.183328	0.250474
Arid5b	45	6.84702e-17	1.61113e-14	0.411437	0.186949
Nudcd2	45	7.20783e-09	4.40777e-07	-0.25082	0.271222
Npnt	46	7.63809e-17	1.75904e-14	0.405292	0.13751
Exosc1	46	8.03879e-09	4.88831e-07	-0.0870781	0.228623
Ctla2a	47	9.23995e-17	2.08361e-14	0.54772	0.209386
Hddc2	47	8.19151e-09	4.94172e-07	-0.0638595	0.253269
Vcam1	48	2.05636e-16	4.54247e-14	0.47939	-0.0173825
Commd2	48	1.1256e-08	6.65763e-07	0.0365926	0.255441
Tmprss6	49	2.53339e-16	5.48428e-14	0.288947	0.182551
Mrps26	49	1.16865e-08	6.83754e-07	0.0129005	0.284866
H2-Aa	50	2.76976e-16	5.8784e-14	0.517779	0.254003
Atp5o	50	1.21274e-08	7.0196e-07	-0.216496	0.31115
Ddx5	51	3.16311e-16	6.58413e-14	0.319959	-0.0742985
Smim3	51	1.24628e-08	7.17538e-07	0.11503	0.276525
Atp2b1	52	3.60308e-16	7.35845e-14	0.398058	-0.107055
Commd3	52	1.38297e-08	7.92024e-07	-0.0968544	0.288903
Npc2	53	4.03176e-16	8.08143e-14	0.33933	-0.161953
Hmgb3	53	1.61646e-08	9.16053e-07	-0.260444	0.211183
Cope	54	5.31374e-16	1.04574e-13	0.408194	0.122263
Marcks	54	1.63071e-08	9.19315e-07	0.251688	0.316108
Hs3st1	55	1.09579e-15	2.118e-13	0.302975	0.13972
Park7	55	1.71348e-08	9.60971e-07	-0.173081	0.311768
Ppl	56	1.91972e-15	3.62017e-13	0.268999	0.0310623
Lsm4	56	2.09333e-08	1.15016e-06	-0.981728	0.335967
Sdc4	57	1.93985e-15	3.62017e-13	0.418409	0.0668133
Ier2	57	5.78062e-10	4.25643e-08	0.416773	0.397364
Osmr	58	2.10522e-15	3.86219e-13	0.320482	0.0467409
Rpp25l	58	2.68566e-08	1.46157e-06	0.0526109	0.189371
B2m	59	2.1936e-15	3.95726e-13	0.268994	-0.188832
Pfdn6	59	2.89866e-08	1.56095e-06	-0.353722	0.277577
Tnip3	60	3.80018e-15	6.74314e-13	0.353031	0.089349
Abcg2	60	4.21055e-08	2.19349e-06	0.0104254	0.146206
Mgst1	61	5.60824e-15	9.7909e-13	0.418278	0.250618
Sumo2	61	4.58361e-08	2.37383e-06	-0.17431	0.278054
Mxd4	62	7.63504e-15	1.31177e-12	0.269421	0.0487809
Lsm7	62	4.61622e-08	2.37933e-06	-0.143788	0.278262
Slco2a1	63	1.42957e-14	2.41776e-12	0.430331	-0.267888
Ndufc2	63	5.23843e-08	2.66201e-06	-0.0990045	0.286589
Moxd1	64	2.62009e-14	4.36306e-12	0.361713	0.121608
Atic	64	5.94213e-08	2.961e-06	0.0254853	0.242697
Plat	65	3.57815e-14	5.86816e-12	0.355885	-0.0210103
Cdk4	65	8.3777e-08	3.95983e-06	-0.328995	0.310865
Fth1	66	5.03764e-14	8.13841e-12	0.325702	-0.320277
Sssca1	66	9.12518e-08	4.29439e-06	0.0196285	0.287025
Ifitm2	67	1.45547e-13	2.25057e-11	0.376842	0.143887
Tsn	67	1.06404e-07	4.94299e-06	-0.0547067	0.276787
Perp	68	2.67663e-13	4.08053e-11	0.369253	0.034804
Gsr	68	1.08865e-07	5.03569e-06	0.0497646	0.265359
Map1lc3b	69	2.72427e-13	4.09549e-11	0.349198	-0.0631497
P2ry2	69	1.12442e-07	5.15707e-06	0.0985471	0.15168
Ehd1	70	2.81816e-13	4.1786e-11	0.399058	-0.0375181
Prmt1	70	1.22432e-07	5.5681e-06	-0.108563	0.288851
Igfbp7	71	3.9805e-13	5.74466e-11	0.622274	0.0123397
Mesd	71	1.28555e-07	5.77642e-06	-0.00483095	0.225075
Basp1	72	4.1466e-13	5.90563e-11	0.39189	-0.0375121
Ranbp1	72	1.31495e-07	5.88139e-06	-0.598957	0.303436
Ace	73	5.05436e-13	7.10499e-11	0.179506	-0.0619003
Gata3	73	1.4506e-07	6.43494e-06	0.205621	0.305059
Asap1	74	5.45509e-13	7.56998e-11	0.360659	-0.0556034
Tsnax	74	1.51816e-07	6.67989e-06	0.12839	0.181182
Tslp	75	6.47697e-13	8.76335e-11	0.702089	0.113274
Mrpl36	75	1.78022e-07	7.76978e-06	-0.0609908	0.203058
Ifngr2	76	1.01489e-12	1.35619e-10	0.331871	0.136132
Traf3ip1	76	1.84181e-07	8.0063e-06	0.033973	0.107504
Zbtb20	77	2.0304e-12	2.68013e-10	0.280062	-0.0936135
Dcps	77	1.878e-07	8.09862e-06	-0.324755	0.242484
Ergic3	78	2.17179e-12	2.83223e-10	0.335815	-0.042599
Uqcc3	78	2.26451e-07	9.72663e-06	0.139672	0.225392
Notum	79	2.449e-12	3.11858e-10	0.207989	-0.0170365
Mrps17	79	2.54218e-07	1.07908e-05	-0.117246	0.25301
Fam107b	80	2.7295e-12	3.43098e-10	0.380481	-0.418763
Cbx3	80	2.66761e-07	1.12351e-05	-0.03144	0.198716
Rabac1	81	3.19185e-12	3.88187e-10	0.338303	-0.0524355
Gadd45gip1	81	2.78943e-07	1.16574e-05	-0.0270963	0.239874
Lamp2	82	4.4699e-12	5.3758e-10	0.318944	-0.140221
Mrpl18	82	2.80471e-07	1.16762e-05	-0.423862	0.248837
Tacstd2	83	5.60065e-12	6.6617e-10	0.305616	0.0354428
Atp5h	83	2.82805e-07	1.17283e-05	-0.192266	0.257062
CT025619.1	84	5.85483e-12	6.88833e-10	0.328633	0.215181
Selenow	84	2.89397e-07	1.19558e-05	0.0540018	0.29354
Kdm5b	85	7.84879e-12	9.13498e-10	0.280146	0.0639829
Mdh1	85	2.99621e-07	1.23256e-05	0.104477	0.290209
Dsp	86	1.23587e-11	1.40812e-09	0.264802	-0.0437261
Rpf2	86	3.03419e-07	1.23256e-05	0.00246396	0.211862
Eif5b	87	1.77221e-11	1.99817e-09	0.303841	0.00234006
Ccnd1	87	3.0354e-07	1.23256e-05	-0.548765	0.376415
Mrpl11	88	3.0404e-07	1.23256e-05	-0.155158	0.225414
Fndc3a	89	2.71861e-11	2.94262e-09	0.332327	-0.0218178
Sbno2	89	1.8288e-08	1.01512e-06	0.276442	0.278558
Fam32a	90	3.26474e-11	3.49877e-09	0.317251	0.185787
Ndufb8	90	3.48492e-07	1.39191e-05	-0.357026	0.27981
Ppp1r14c	91	3.47126e-11	3.67663e-09	0.187696	0.0964169
Ap1s1	91	3.53846e-07	1.4081e-05	-0.198889	0.237986
Tpt1	92	3.49865e-11	3.67663e-09	0.207689	-0.144496
Cald1	92	4.21514e-08	2.19349e-06	0.293062	0.301758
Ddx17	93	4.2962e-11	4.42877e-09	0.312294	-0.0181262
Ppp1r14b	93	4.04013e-07	1.596e-05	-0.279836	0.290953
Sesn3	94	4.61934e-11	4.71696e-09	0.297445	0.033543
Gfer	94	4.26321e-07	1.678e-05	-0.0382167	0.177811
Ltbp2	95	4.86233e-11	4.91868e-09	0.260332	-0.0362766
Cenpv	95	4.30478e-07	1.68822e-05	-0.338313	0.218139
Ctsd	96	5.25966e-11	5.27135e-09	0.354713	-0.158034
Med8	96	4.41563e-07	1.71687e-05	0.00971189	0.210109
Psap	97	6.29124e-11	6.19058e-09	0.333584	-0.169411
Smarcc1	97	4.42541e-07	1.71687e-05	0.202441	0.260305
Ube2d1	98	6.60412e-11	6.39582e-09	0.251311	0.0768122
Nucks1	98	4.58949e-07	1.76785e-05	-0.460877	0.2639
Col6a2	99	6.61799e-11	6.39582e-09	0.187241	-0.163565
Dtymk	99	5.45748e-07	2.05825e-05	-0.812269	0.254967
Mat2a	100	6.94951e-11	6.65677e-09	0.331639	-0.151316
Ado	100	5.53033e-07	2.07848e-05	-0.0121148	0.177365
Fst	101	5.67951e-07	2.11983e-05	-0.0831149	0.159248
Akap9	102	1.20185e-10	1.09307e-08	0.308735	0.163537
Sike1	102	5.81377e-07	2.16248e-05	0.0774451	0.186713
Map1b	103	1.21183e-10	1.09307e-08	0.327405	0.145924
Pgs1	103	6.0113e-07	2.2283e-05	-0.117286	0.199681
Sox4	104	1.22295e-10	1.09399e-08	0.406448	0.0176793
Timm22	104	6.49672e-07	2.39185e-05	-0.0807905	0.199377
Smox	105	1.31534e-10	1.1575e-08	0.31041	-0.205062
Trim27	105	7.22596e-07	2.64236e-05	0.144262	0.238389
Tmc4	106	1.66081e-10	1.42671e-08	0.250657	0.0350146
Rrp15	106	7.86292e-07	2.84895e-05	0.15735	0.248162
Rps27l	107	7.86989e-07	2.84895e-05	-0.0778206	0.24523
Pdgfc	108	2.19244e-10	1.85399e-08	0.166785	0.0369653
Usp18	108	7.94848e-07	2.86781e-05	0.200403	0.226446
Mrpl2	109	8.18539e-07	2.94348e-05	-0.24916	0.183932
Rpl3	110	2.41211e-10	2.01569e-08	0.23386	0.0342938
Mrpl42	110	8.79588e-07	3.11133e-05	-0.579133	0.249458
Lrrc8d	111	2.42091e-10	2.01569e-08	0.21671	0.0528603
Med21	111	9.31178e-07	3.26184e-05	0.136479	0.245817
Car9	112	2.50344e-10	2.06818e-08	0.274887	-0.258465
Hnrnpa3	112	9.81636e-07	3.41647e-05	-0.265255	0.279108
Rbms1	113	2.65153e-10	2.15791e-08	0.307285	-0.106524
Metrnl	113	3.33936e-08	1.77182e-06	0.184536	0.17623
Arhgap42	114	2.84621e-10	2.29906e-08	0.212503	-0.0162955
Ggta1	114	5.00789e-07	1.90194e-05	0.17295	0.183567
Acsl4	115	3.06189e-10	2.43691e-08	0.277572	0.025163
Calm2	115	1.13062e-06	3.89739e-05	0.0547654	0.243917
Jak2	116	3.42802e-10	2.66941e-08	0.281017	0.172505
Mrpl41	116	1.21134e-06	4.13612e-05	0.00265282	0.187128
Urah	117	4.04383e-10	3.12646e-08	0.312201	0.223992
Cdkn2aipnl	117	1.31066e-06	4.43332e-05	-0.123353	0.17241
Nt5c	118	1.36137e-06	4.59048e-05	-0.0103646	0.22347
Vwa5a	119	4.35808e-10	3.3374e-08	0.292503	0.147301
Guk1	119	1.40007e-06	4.70634e-05	-0.241621	0.20065
Atxn7l3b	120	4.87658e-10	3.66556e-08	0.298343	0.119307
Ppdpf	120	1.46492e-06	4.89923e-05	0.153477	0.205717
Eef1g	121	5.09973e-10	3.80686e-08	0.274464	0.186739
Gtf3c6	121	1.46651e-06	4.89923e-05	0.106069	0.22912
Ptrh2	122	1.53765e-06	5.12107e-05	-0.0430768	0.16098
Bmp1	123	5.89968e-10	4.31474e-08	0.305826	0.110457
Banf1	123	1.74164e-06	5.7474e-05	-0.611755	0.26249
Cd81	124	7.91413e-10	5.74916e-08	0.317515	-0.0165925
Glo1	124	1.75557e-06	5.77576e-05	0.0871434	0.248788
Col6a1	125	1.09484e-09	7.90034e-08	0.317418	-0.463915
Ctps	125	1.9772e-06	6.39887e-05	0.0986618	0.181402
Stom	126	1.12434e-09	8.0595e-08	0.189953	0.10797
1700020I14Rik	126	1.2785e-06	4.33809e-05	0.183931	0.203159
Aldoc	127	1.55987e-09	1.10353e-07	0.236723	-0.0232728
Tnfsf10	127	2.1659e-06	6.91556e-05	0.0512593	0.110176
Trip11	128	1.58647e-09	1.11506e-07	0.269135	0.0989818
Cldn7	128	2.18669e-06	6.96138e-05	0.207247	0.334845
Tanc2	129	1.67233e-09	1.16783e-07	0.227738	-0.137904
Ssbp4	129	2.23199e-06	7.08478e-05	-5.60195e-05	0.238654
Mmp14	130	1.95885e-09	1.35914e-07	0.2843	0.00647907
Trappc5	130	2.26731e-06	7.15491e-05	0.0344484	0.188144
Aldh2	131	2.10165e-09	1.44893e-07	0.309442	0.00117786
Cox19	131	2.12034e-09	1.45257e-07	0.196164	0.169181
Fkbp3	132	2.39603e-06	7.53912e-05	-0.451594	0.268159
H2-K1	133	2.20818e-09	1.50323e-07	0.250942	-0.0961717
Cttn	133	2.45232e-06	7.69389e-05	0.106985	0.239618
Eif3f	134	2.29578e-09	1.5531e-07	0.281831	0.0756331
Tmem216	134	2.53277e-06	7.87778e-05	0.0717835	0.169477
Top1	135	2.51342e-09	1.68977e-07	0.288176	-0.387504
Asf1a	135	2.59028e-06	8.01061e-05	0.0818654	0.219342
Tcaf1	136	2.83407e-09	1.88196e-07	0.175216	0.0303333
Ciapin1	136	2.61569e-06	8.06615e-05	0.0685167	0.249316
Cxcl1	137	3.05232e-09	1.99915e-07	0.722848	-1.54779
Ppia	137	2.7176e-06	8.35663e-05	-0.271195	0.175582
Nek7	138	3.16086e-09	2.04869e-07	0.243443	0.149866
Ccdc124	138	2.85717e-06	8.73617e-05	-0.254614	0.224894
Kdf1	139	4.57874e-09	2.91531e-07	0.195395	0.167915
Nme1	139	2.89996e-06	8.84202e-05	-0.305868	0.237699
Lgals3	140	4.87333e-09	3.08473e-07	0.383906	-0.884244
Pycr2	140	3.00135e-06	9.12544e-05	-0.0656439	0.169532
Rpl24	141	5.6696e-09	3.54727e-07	0.182459	-0.0258638
Ddx55	141	2.26162e-06	7.15491e-05	0.125661	0.139632
Mrps31	142	3.12269e-06	9.4678e-05	0.112693	0.135746
Sdc1	143	8.24202e-09	4.94172e-07	0.323523	-0.0770796
Psmb9	143	3.21308e-06	9.71462e-05	-0.595037	0.298954
Krt19	144	8.2636e-09	4.94172e-07	0.344941	-0.0300605
2310039H08Rik	144	3.22882e-06	9.73503e-05	-0.0343571	0.182263
Tax1bp1	145	8.59272e-09	5.11031e-07	0.289676	-0.0319248
Selenoh	145	3.23838e-06	9.73672e-05	-0.973064	0.236917
Il4ra	146	1.15211e-08	6.77739e-07	0.193776	0.166956
Steap4	147	1.207e-08	7.0196e-07	0.105924	0.0825513
Emg1	147	3.50292e-06	0.000104164	-0.139787	0.248287
Itgb5	148	1.45502e-08	8.28899e-07	0.188609	0.0721881
Spp1	149	1.78287e-08	9.94728e-07	0.576494	-0.402365
Bag4	150	4.01984e-06	0.000116964	0.0767536	0.133858
Alcam	151	1.98597e-08	1.09674e-06	0.271151	-0.147816
Tmem167	151	4.15911e-06	0.000120692	0.023958	0.246918
Mrpl22	152	4.51967e-06	0.000129968	-0.055057	0.164247
Polr2c	153	4.57801e-06	0.00013048	0.00528054	0.234648
Fbxo32	154	2.68711e-08	1.46157e-06	0.170631	0.00069724
Psmd5	154	4.60316e-06	0.000130773	0.121854	0.168148
Insr	155	2.74296e-08	1.48449e-06	0.16185	0.0287349
Med28	155	4.66972e-06	0.000132317	-0.17667	0.247057
Hdac5	156	2.93556e-08	1.57299e-06	0.13619	0.0949886
Klf10	156	4.79972e-06	0.000135292	0.0915967	0.192285
Laptm4a	157	3.26613e-08	1.74151e-06	0.290385	-0.187816
Mrpl58	157	4.85828e-06	0.000136587	-0.173551	0.188635
Dhx30	158	5.0447e-06	0.000141095	0.0776739	0.178388
Elovl7	159	3.91021e-08	2.06459e-06	0.228823	-0.0424567
Cnpy2	159	5.10308e-06	0.00014236	0.0192951	0.251409
Eef1a1	160	4.08865e-08	2.14833e-06	0.202655	-0.0199812
Ash2l	160	5.18579e-06	0.000143926	0.0261008	0.172162
Clpp	161	5.31596e-06	0.00014712	-0.0803232	0.208878
Rin2	162	4.86208e-08	2.49418e-06	0.214238	0.11955
Cops6	162	5.32806e-06	0.00014712	-0.186525	0.249454
Uqcrh	163	5.19648e-08	2.65314e-06	0.257442	-0.140804
Lasp1	163	5.56379e-06	0.000152849	-0.0343417	0.175258
Padi4	164	5.32651e-08	2.69412e-06	0.261287	0.152936
Ssbp1	164	5.58136e-06	0.000152943	-0.105877	0.184578
Myh14	165	5.73292e-08	2.88429e-06	0.104058	0.0273945
Atp5g2	165	5.64637e-06	0.000154334	-0.421164	0.253721
S100a14	166	5.75578e-08	2.88429e-06	0.179589	0.155098
Tex261	166	5.90039e-06	0.000160821	0.0581324	0.169702
Klhl24	167	5.96358e-08	2.961e-06	0.168643	-0.116511
Cbx5	167	5.91341e-06	0.000160821	-0.0858268	0.170001
Tmie	168	6.41517e-08	3.17068e-06	0.101417	0.08116
Emc8	168	5.93948e-06	0.000161125	-0.0946833	0.213962
Plcg2	169	6.99348e-08	3.44079e-06	0.182579	0.0779577
Nvl	169	6.09809e-06	0.000164195	0.0236953	0.157611
Lyst	170	7.21318e-08	3.53283e-06	0.140496	0.0798311
Psmb6	170	6.25984e-06	0.000167714	-0.0935757	0.247035
Lsg1	171	7.46475e-08	3.63464e-06	0.179161	0.070857
H2-Ab1	172	7.48821e-08	3.63464e-06	0.352384	0.151884
A430005L14Rik	172	6.36643e-06	0.000170149	-0.0341391	0.168175
Itpripl2	173	7.56105e-08	3.65361e-06	0.218916	0.158923
Rrs1	174	7.73141e-08	3.71932e-06	0.278904	0.135639
Bid	174	6.60493e-07	2.42345e-05	0.178016	0.173022
Tcf12	175	7.78066e-08	3.72646e-06	0.202022	0.082809
Mrps14	175	6.71508e-06	0.000178147	-0.229034	0.252505
Rpl10-ps3	176	7.95065e-08	3.7911e-06	0.267726	0.0713673
Ndufa12	176	6.89685e-06	0.000181999	-0.148712	0.259316
Ptov1	177	8.32222e-08	3.95087e-06	0.251067	0.104215
Arntl2	177	6.91073e-06	0.000181999	0.0957711	0.115164
Nisch	178	9.77821e-08	4.58179e-06	0.242304	0.0994598
Prpf31	178	7.29793e-06	0.00019173	-0.0148232	0.144244
Qsox1	179	1.04886e-07	4.89349e-06	0.186241	-0.00568272
Kank3	179	2.06839e-06	6.64383e-05	0.199069	0.20211
Igf2r	180	1.10607e-07	5.0945e-06	0.212276	-0.0405924
Jpt1	180	7.59162e-06	0.00019762	-0.185523	0.260044
Ssbp2	181	1.15826e-07	5.2899e-06	0.14329	0.0574865
Cks1b	181	7.91685e-06	0.000204029	-1.2696	0.26369
Plac8	182	1.28157e-07	5.77642e-06	0.131982	0.110063
Atpif1	182	7.95142e-06	0.000204112	-0.123283	0.234228
Sdf2	183	1.28614e-07	5.77642e-06	0.247985	0.029024
Drg1	183	7.95779e-06	0.000204112	-0.00123489	0.178201
Ehf	184	1.32338e-07	5.89476e-06	0.113704	0.0224184
Prpf19	184	8.37394e-06	0.000213486	0.00257275	0.215366
Dlgap4	185	1.4796e-07	6.53683e-06	0.209259	-0.0521241
H2afv	185	8.38244e-06	0.000213486	-0.590815	0.260867
Rps4x	186	1.65103e-07	7.23511e-06	0.193084	0.00654817
Scoc	186	8.67516e-06	0.000219392	-0.139791	0.164363
Macrod1	187	1.86986e-07	8.09573e-06	0.110755	0.0273451
Vars	187	8.77615e-06	0.000221429	-0.379256	0.19544
Use1	188	2.34025e-07	1.00122e-05	0.272364	-0.152716
Sfxn1	188	9.34079e-06	0.000234582	-0.0178315	0.211752
Ccdc50	189	2.47986e-07	1.05677e-05	0.204244	0.0607053
Rpp38	189	1.02077e-05	0.000252367	0.0782396	0.125363
Mtss1	190	2.62715e-07	1.11079e-05	0.287035	-0.281382
Rpp14	190	1.02122e-05	0.000252367	0.0412315	0.136207
Rpl37a	191	2.78003e-07	1.16574e-05	0.189626	0.00660104
Mrpl19	191	1.05049e-05	0.000259009	0.0895549	0.149639
Thbs1	192	3.03592e-07	1.23256e-05	0.173412	-0.139014
Npm3	192	1.0636e-05	0.000261645	0.0718054	0.236765
Sod2	193	3.07219e-07	1.2408e-05	0.278328	0.035662
Mrps18c	193	1.08455e-05	0.000265593	-0.24041	0.190896
Junb	194	3.11584e-07	1.25375e-05	0.355342	-0.334393
Ssu72	194	1.09692e-05	0.000268015	-0.235188	0.221522
Gja1	195	3.40564e-07	1.36528e-05	0.266144	-0.0652299
Parp1	195	1.12743e-05	0.000274231	-0.0873872	0.133334
Srsf5	196	3.77571e-07	1.49701e-05	0.259986	-0.107128
Trim35	196	1.14885e-05	0.000278815	0.149402	0.202339
Pacsin3	197	4.32804e-07	1.69122e-05	0.182355	0.0529116
Tnfrsf1a	197	1.15221e-05	0.000279005	0.103279	0.181374
Krt15	198	4.44233e-07	1.71728e-05	0.14043	-0.0235213
Mtif3	198	1.16545e-05	0.000281582	0.0391119	0.0973956
Vps37a	199	4.61819e-07	1.7726e-05	0.226676	0.0449992
Fam69b	199	1.25396e-05	0.000301058	0.0457051	0.117577
Egln3	200	4.66054e-07	1.78253e-05	0.23166	-0.0529696
Samd5	200	1.25894e-05	0.000301477	0.0913092	0.107471
Vamp8	201	4.80968e-07	1.8331e-05	0.240282	0.101407
Smpd2	201	1.26738e-05	0.000302828	0.0791674	0.113896
Lama5	202	5.30553e-07	2.00794e-05	0.192611	0.000877925
Zdhhc16	202	1.30124e-05	0.000308198	-0.0804989	0.153664
Arhgap26	203	5.63114e-07	2.10905e-05	0.115442	0.0410929
Id1	203	1.34187e-05	0.000317127	0.133193	0.1994
H3f3a	204	1.36939e-05	0.000320827	0.108569	0.202358
Adam10	205	6.284e-07	2.32143e-05	0.203698	0.051019
Polr3h	205	1.38188e-05	0.000323056	0.0209009	0.11536
Nkap	206	1.46265e-05	0.000339736	0.0505907	0.130499
H2-Eb1	207	7.47946e-07	2.72585e-05	0.33531	0.132733
Knop1	207	1.47534e-05	0.00034195	0.152402	0.197375
Plk2	208	8.27111e-07	2.96445e-05	0.237067	-0.192156
Crispld2	208	1.55662e-05	0.000357724	0.0939124	0.158775
Hook3	209	8.33158e-07	2.97627e-05	0.202704	-0.00606709
Naa38	209	1.57599e-05	0.000361409	-0.259465	0.201164
Lamc2	210	8.56456e-07	3.04943e-05	0.260711	-0.206094
Srek1ip1	210	1.60044e-05	0.000366007	0.0686609	0.165241
Large1	211	8.65831e-07	3.07271e-05	0.106109	0.0250392
Ppp1ca	211	1.63519e-05	0.000372617	-0.2499	0.237191
Arf3	212	9.2129e-07	3.24822e-05	0.160905	0.0854526
Sem1	212	1.63935e-05	0.00037278	0.075769	0.212941
Tcp11l2	213	9.25062e-07	3.25093e-05	0.0930196	-0.0433505
Rab25	213	8.22696e-06	0.000210517	0.201365	0.215408
Ramp1	214	9.66379e-07	3.37422e-05	0.177276	0.0802013
Zfp91	214	1.65594e-05	0.000375763	-0.205427	0.204816
Lhfpl2	216	1.10876e-06	3.84654e-05	0.173177	0.0127456
Mrpl46	216	1.73399e-05	0.000391014	0.0479818	0.149561
Bod1l	217	1.12404e-06	3.88711e-05	0.22927	0.13137
Apex1	217	1.78232e-05	0.000401078	0.0477185	0.206738
Gabarap	218	1.16648e-06	4.00823e-05	0.226723	-0.222496
Skp2	218	1.89309e-05	0.000423365	-0.0563544	0.113823
Pla2g7	219	1.19987e-06	4.10994e-05	0.143635	-0.122334
Mrps18a	219	1.99028e-05	0.000442357	-0.162888	0.207001
App	220	1.27804e-06	4.33809e-05	0.219586	-0.0961047
Eif1b	220	2.03233e-05	0.000450778	0.0255349	0.204772
Pdzrn3	221	1.57527e-06	5.21723e-05	0.111953	0.0649248
B4galt2	221	2.05673e-05	0.000455257	0.0148065	0.0708741
Pptc7	222	1.57616e-06	5.21723e-05	0.133947	0.0105611
Pole3	222	2.12584e-05	0.000469594	-0.212355	0.172382
Gm15987	223	1.79166e-06	5.87666e-05	0.0999274	0.0581237
Tgm2	223	2.16002e-05	0.000476173	0.0847611	0.183299
Nhs	224	1.86323e-06	6.09295e-05	0.118986	0.0404123
Rhod	224	2.18467e-05	0.000478801	0.031878	0.128756
Bnip3l	225	1.92416e-06	6.27322e-05	0.243602	-0.166741
Ppp1cc	225	2.18964e-05	0.000478801	-0.0934963	0.212994
Gtpbp4	226	1.93066e-06	6.2755e-05	0.231717	0.0620267
Snf8	227	2.2614e-05	0.000492502	-0.153349	0.211067
Ptgs1	228	1.98043e-06	6.39887e-05	0.136106	0.0152677
Cops7b	228	2.27384e-05	0.000494219	0.0325038	0.097617
Mocs2	229	2.3296e-05	0.000505322	-0.0182304	0.164532
Tnfaip8	230	2.35019e-05	0.000508769	0.14927	0.219711
Rerg	231	2.06853e-06	6.64383e-05	0.0611831	0.0462518
Eef1e1	231	2.38036e-05	0.000514272	0.155321	0.224929
Pdia3	232	2.09022e-06	6.69365e-05	0.236609	-0.0330266
Mrps34	232	2.38792e-05	0.000514878	0.0376945	0.201307
Top2b	233	2.47966e-06	7.75718e-05	0.187328	0.111756
Hnrnpr	233	2.40216e-05	0.000515914	-0.0503728	0.20868
Itgb4	234	2.51965e-06	7.85958e-05	0.195592	-0.064779
Tbrg1	234	2.4111e-05	0.000516786	-0.200147	0.244176
Ppil1	235	2.44245e-05	0.000522472	-0.303718	0.159952
Rpl36a	236	2.56763e-06	7.96333e-05	0.183878	-0.0682795
Rnf187	236	2.49162e-05	0.000530892	-0.237519	0.199732
Irf7	237	2.79472e-06	8.5694e-05	0.271672	0.169552
1810022K09Rik	237	2.5017e-05	0.000530911	0.00594386	0.160093
Manbal	238	2.50643e-05	0.000530911	-0.0283651	0.178719
H2-T23	239	3.30987e-06	9.9222e-05	0.244971	0.00425911
Ssna1	239	2.57442e-05	0.000542131	-0.242498	0.190767
Tspan1	240	3.3184e-06	9.9222e-05	0.0808356	0.0656162
Lpcat1	240	2.69158e-05	0.000562426	-0.0408583	0.131678
Aldoa	241	3.44485e-06	0.000102719	0.279529	-0.405189
Epn2	241	2.72136e-05	0.000565244	0.00123955	0.209467
Cebpz	242	3.53882e-06	0.000104943	0.214241	0.166681
Triap1	242	2.73019e-05	0.000565244	0.052095	0.125869
Dst	243	3.69244e-06	0.0001092	0.226607	-0.144825
Atp5c1	243	2.81058e-05	0.000579199	-0.0430294	0.238227
2900097C17Rik	244	3.80144e-06	0.000112069	0.177468	-0.021985
Ei24	244	2.81466e-05	0.000579199	0.155562	0.209233
Tnc	245	3.81017e-06	0.000112069	0.207958	-0.109342
Mlec	245	2.83575e-05	0.000581329	0.0338768	0.193739
Psmg3	246	2.88145e-05	0.000589581	0.0750395	0.163911
Atp11a	247	3.98224e-06	0.000116627	0.170117	-0.0120145
Stmn1	247	2.89012e-05	0.000590239	-0.744806	0.18734
Nipal2	248	3.99495e-06	0.000116627	0.135776	0.0667248
Cetn3	248	3.00009e-05	0.000610265	-0.05701	0.193655
Slc6a6	249	3.99746e-06	0.000116627	0.199975	-0.0513399
Mrps18b	249	3.00016e-05	0.000610265	-0.0590932	0.186909
Rcn2	250	4.43024e-06	0.000128216	0.223407	0.0317351
Ifi35	250	3.00509e-05	0.000610265	-0.168876	0.238595
Id3	251	4.50312e-06	0.000129968	0.372756	0.283239
Wdr83os	251	3.04963e-05	0.000617098	0.150341	0.200171
Nfib	252	1.25441e-05	0.000301058	0.211181	0.227646
Chmp7	253	4.52677e-06	0.000129968	0.113676	0.0540734
Pnpt1	253	3.13268e-05	0.000631437	0.0218102	0.0743231
Igf1r	254	4.5787e-06	0.00013048	0.178882	0.0317824
Ndufa5	254	3.15509e-05	0.000633719	-0.0895767	0.195945
Ctnna1	255	4.5808e-06	0.00013048	0.212809	-0.0933918
Tmem234	255	3.21345e-05	0.000641741	-0.176344	0.208361
Cd3eap	256	4.72146e-06	0.000133434	0.169983	0.126679
Ptpn13	257	4.88682e-06	0.000137034	0.149161	0.0413316
Mrm2	257	3.22734e-05	0.000643328	0.0335904	0.0585968
Agrn	258	5.14184e-06	0.000143073	0.143461	0.00359668
Mcrip1	258	3.25097e-05	0.000645661	-0.0241629	0.204451
Il6st	259	5.51259e-06	0.000151828	0.171112	0.0406788
Plekha7	259	3.27187e-05	0.000648621	0.015094	0.0887904
Pgpep1	260	5.99549e-06	0.000162238	0.133416	0.0957257
Lad1	260	3.30273e-05	0.000651161	-0.0196922	0.219203
Tnip2	261	6.09814e-06	0.000164195	0.109182	0.0468967
Atp5g1	261	3.34614e-05	0.000657326	-0.31113	0.24103
Nob1	262	6.2014e-06	0.000166561	0.200868	0.0176079
Ywhae	262	3.3883e-05	0.00066427	-0.156202	0.199178
4833420G17Rik	263	6.39968e-06	0.000170616	0.142839	0.102498
Smyd5	263	3.39377e-05	0.00066427	0.0124069	0.106858
Mgp	264	6.51971e-06	0.000173389	0.231337	0.106394
Elof1	264	3.52638e-05	0.00068774	-0.266812	0.20314
Rnf44	265	6.80399e-06	0.000180065	0.117917	0.0263823
G3bp2	265	1.93319e-05	0.000431441	0.206854	0.231728
Eif3h	266	7.38914e-06	0.000193656	0.199417	-0.0127923
Ndufab1	266	3.64368e-05	0.000708065	-0.301746	0.227473
Glb1	267	7.49495e-06	0.000195955	0.132758	-0.0184888
Nfe2l3	267	3.72062e-05	0.000721518	0.029619	0.0492774
Ctnnb1	268	7.59514e-06	0.00019762	0.213105	0.0646075
Dcakd	268	3.80565e-05	0.000734267	-0.0740265	0.125711
Prr13	269	7.64772e-06	0.00019851	0.225442	-0.0322353
Arl6ip4	269	3.84511e-05	0.000739245	-0.0713205	0.122815
Slc4a7	270	7.85551e-06	0.000202965	0.179209	-0.1316
Slc25a11	270	3.9204e-05	0.000751051	-0.106067	0.164385
Itpr2	271	7.85681e-06	0.000202965	0.10916	-0.0463995
Ndufs7	271	3.97505e-05	0.000760176	-0.013203	0.226788
Bcl2l1	272	8.56944e-06	0.00021762	0.119701	0.120076
Mydgf	272	3.99985e-05	0.000762225	-0.136318	0.211828
Tpbg	273	8.58497e-06	0.00021762	0.199627	0.0999722
Ifngr1	274	9.00413e-06	0.000226653	0.161721	0.0306582
Nsmce1	274	4.02627e-05	0.000765911	-0.263035	0.150606
Tgfbr3	275	9.38486e-06	0.000234779	0.0684642	0.0345129
Tma7	275	4.06177e-05	0.000771309	-0.299558	0.226868
Krtcap3	276	9.39203e-06	0.000234779	0.207067	0.0834298
Snrpa1	276	4.09827e-05	0.000775518	-0.315049	0.197115
Svil	277	9.70034e-06	0.000241927	0.170674	0.0195773
Ndufv2	277	4.17582e-05	0.000784975	-0.177677	0.221791
Acaa1a	278	9.75135e-06	0.000242641	0.171187	0.0362248
Lysmd2	278	4.17725e-05	0.000784975	0.0445354	0.146132
Fbxl5	279	1.01277e-05	0.000251428	0.175949	0.0774651
Trmt6	279	4.20669e-05	0.000789136	-0.0444071	0.120818
Commd1	280	4.2276e-05	0.000791687	-0.159041	0.224953
H19	281	1.07612e-05	0.000264125	0.263122	0.142131
Zfp955b	281	4.24945e-05	0.000793232	0.0762438	0.0929282
Ibsp	282	1.10569e-05	0.000269548	0.125787	-0.0575565
Rbmxl1	282	4.27753e-05	0.000795045	0.103684	0.203871
Pdgfa	283	1.21642e-05	0.000293242	0.282214	-0.0432891
Dut	283	4.27962e-05	0.000795045	-0.787685	0.237788
Ndufa3	284	4.28225e-05	0.000795045	-0.129654	0.154027
Eps15l1	286	1.27127e-05	0.000303088	0.12527	0.0577296
Vdac3	286	4.35163e-05	0.000806541	-0.162352	0.232844
Cd164	287	1.28275e-05	0.000305153	0.213997	-0.00794501
P4ha2	288	1.28734e-05	0.000305573	0.0908606	-0.0422128
Malsu1	288	4.46417e-05	0.000825986	0.0187926	0.179299
Fam117b	289	1.34769e-05	0.000317195	0.101121	-0.061695
Stx16	290	1.34802e-05	0.000317195	0.173387	0.0932877
Tpr	290	4.5289e-05	0.000836532	0.0389872	0.221732
Itm2c	291	1.35251e-05	0.000317561	0.195147	0.0299152
Hdhd3	291	4.60821e-05	0.000848287	0.0461854	0.0567794
Dbn1	292	1.40855e-05	0.000328581	0.143295	0.0929854
Ints5	292	4.70328e-05	0.000862852	0.0315462	0.0932283
Tmed4	293	1.43334e-05	0.000333644	0.170085	0.100504
Aes	293	4.72468e-05	0.000865312	-0.13968	0.226493
Anxa6	294	1.51444e-05	0.000350262	0.197164	0.152281
Pinx1	294	4.91149e-05	0.000896491	0.080916	0.136981
Rcl1	295	1.53785e-05	0.000354918	0.177034	0.168576
Ppcs	295	4.97163e-05	0.000905941	0.0698057	0.0952784
Podxl	296	1.54945e-05	0.000356836	0.107609	0.0492999
Tsfm	296	5.0805e-05	0.000922673	-0.114004	0.128161
Cd74	297	1.6028e-05	0.000366007	0.237424	0.0181253
Rpl7l1	297	5.11886e-05	0.000928083	0.00518766	0.191719
Hspa5	298	1.67131e-05	0.000378456	0.225338	-0.224797
Psmb10	298	5.29285e-05	0.000953243	-0.25245	0.249565
Eif4a2	299	1.68758e-05	0.000381343	0.214591	-0.159317
Clns1a	299	5.41802e-05	0.000974164	-0.0432726	0.168809
Efna5	300	1.81575e-05	0.000407753	0.161149	0.0686703
Gpatch2	300	5.44769e-05	0.000977873	0.104402	0.126087
Cdcp1	301	1.84387e-05	0.00041321	0.205811	-0.0712182
Paics	301	5.59563e-05	0.00100277	0.0237878	0.214962
Prag1	302	1.9723e-05	0.000439263	0.173281	0.0498444
2810004N23Rik	302	5.67904e-05	0.00101603	0.0650985	0.202514
Fam192a	303	2.18182e-05	0.000478801	0.170097	0.114996
Gns	304	2.18887e-05	0.000478801	0.133368	0.0598955
Exosc7	304	5.76598e-05	0.00102819	-0.0678881	0.143986
Ddx54	305	2.24988e-05	0.000490981	0.160135	0.0526494
Polr3k	305	5.86083e-05	0.00104338	-0.00568094	0.1516
Rpl32	306	2.40226e-05	0.000515914	0.136021	0.112868
Ankrd27	306	5.99957e-05	0.00106593	0.0268502	0.0801966
Arhgef17	307	2.47725e-05	0.000528872	0.115942	0.109349
Wdr92	307	6.00716e-05	0.00106593	0.0209403	0.075644
Zfp771	308	2.49806e-05	0.000530911	0.144001	0.105869
Nr2c2ap	308	6.10178e-05	0.00107918	0.00197305	0.139092
Lpp	309	2.54853e-05	0.00053867	0.147618	-0.0288158
Eef1akmt1	309	6.19326e-05	0.00108833	0.001163	0.137368
Cldn3	310	2.55301e-05	0.00053867	0.254988	0.180697
Ecsit	310	6.19373e-05	0.00108833	0.0451559	0.0995483
Fbxl20	311	2.62419e-05	0.000551039	0.0917676	0.0446531
Anapc5	311	6.3285e-05	0.0011102	-0.16947	0.217559
Cpne3	312	2.6269e-05	0.000551039	0.177611	0.15213
Mcat	312	6.35377e-05	0.00111283	0.0343367	0.0731327
Rtf1	313	2.68267e-05	0.000561648	0.202477	-0.0586381
Zfp157	313	3.28478e-05	0.000648805	0.0706929	0.0709074
Nedd4	314	2.69756e-05	0.00056259	0.205932	0.0452622
Agpat2	314	3.31022e-05	0.000651451	0.158242	0.174823
Ednra	315	2.70941e-05	0.000563975	0.0464993	0.031143
Arl10	315	6.64685e-05	0.00115668	0.05351	0.0763235
Heg1	316	2.73118e-05	0.000565244	0.0695211	0.0326403
Skp1a	316	6.49742e-05	0.0011325	0.185364	0.210578
Zbtb38	317	2.75671e-05	0.00056944	0.197663	0.0731289
Acp1	317	6.72609e-05	0.00116672	-0.228307	0.172098
Stap2	318	2.82368e-05	0.000579952	0.128428	0.0319068
Timm17a	318	6.81021e-05	0.00117819	-0.143177	0.210735
Igbp1	319	3.05014e-05	0.000617098	0.175799	0.00059131
Hoxa5	319	6.82488e-05	0.00117819	0.054437	0.140113
Tradd	320	3.11042e-05	0.00062812	0.123879	0.123129
Ilk	320	6.9217e-05	0.001193	0.0500902	0.142806
Slc16a2	321	3.15571e-05	0.000633719	0.0627527	0.0261797
Mrps35	321	7.18346e-05	0.00123223	-0.0532698	0.131084
Rab14	322	3.17447e-05	0.000636276	0.206897	0.0230606
Tmem70	322	7.30033e-05	0.00124364	0.0565541	0.121246
Selenom	323	3.18021e-05	0.000636276	0.194597	0.042691
5730409E04Rik	323	7.30739e-05	0.00124364	0.0574001	0.0683066
Ddah2	324	3.23507e-05	0.000643684	0.201125	0.150465
Tmem41a	324	7.35602e-05	0.00124995	0.0642184	0.0804641
Sphk1	325	3.28299e-05	0.000648805	0.131879	-0.113738
Casp12	325	3.76044e-05	0.000726839	0.136826	0.142964
Cnot7	326	3.51639e-05	0.000687029	0.189027	-0.00693634
Psme2	326	7.82678e-05	0.00132578	-0.121003	0.220035
Kmt2c	327	3.62138e-05	0.000704996	0.117976	0.0191439
Hoxa10	327	7.86496e-05	0.00132855	0.0121406	0.0833479
Serinc1	328	3.72625e-05	0.000721518	0.190564	0.0157882
Mrpl55	328	7.88e-05	0.00132855	-0.113468	0.136275
Ttc14	329	3.83769e-05	0.000739131	0.173188	0.149468
Mrpl49	330	8.04076e-05	0.00135145	-0.22664	0.157879
Csad	331	3.87477e-05	0.000743625	0.0956769	0.084468
Zbtb8os	331	8.06941e-05	0.00135416	-0.0215617	0.0922606
Cul1	332	3.9832e-05	0.000760391	0.179494	-0.0278713
Ehmt1	332	8.13078e-05	0.00136024	0.127236	0.161028
Polr2f	333	8.22167e-05	0.00137332	-0.243509	0.209262
Serinc2	334	4.09594e-05	0.000775518	0.184625	0.120355
Brd7	334	8.29025e-05	0.00138264	0.0564388	0.162106
Phf14	335	8.53331e-05	0.00141663	0.118617	0.164569
Susd6	336	4.14541e-05	0.000783069	0.129796	0.0745088
Nmi	336	8.63637e-05	0.00143155	-0.188291	0.194014
Kif3a	337	4.16052e-05	0.000784554	0.160191	0.168181
Las1l	338	4.25051e-05	0.000793232	0.2403	-0.20648
Nfyb	338	8.73979e-05	0.00144442	-0.00888175	0.128698
Zfp637	339	4.57861e-05	0.000844274	0.137678	0.13153
Nubp1	339	8.75407e-05	0.00144442	-0.28457	0.145648
Timm10	340	4.67065e-05	0.000858321	0.175169	0.133728
Casp8ap2	340	8.81025e-05	0.00144992	-0.125176	0.130478
Ppan	341	4.87498e-05	0.000891332	0.180581	-0.024469
Sncg	341	8.81418e-05	0.00144992	-0.0148552	0.11633
Hexa	342	5.05055e-05	0.000918776	0.075202	0.0337258
Chuk	342	8.83818e-05	0.00145166	0.0463998	0.118652
Ehd2	343	8.977e-05	0.00147223	0.0761354	0.155947
Fbxo3	344	5.28046e-05	0.000953243	0.0958722	0.0892901
Idnk	344	9.03743e-05	0.00147432	0.016005	0.167197
Phldb2	345	5.2848e-05	0.000953243	0.110455	0.0989151
Eif3c	345	9.03865e-05	0.00147432	-0.244842	0.215785
Fndc3b	346	5.29286e-05	0.000953243	0.159442	-0.241623
Bysl	346	9.07309e-05	0.0014768	0.0257625	0.118859
Map7	347	5.69689e-05	0.00101754	0.115918	0.0492074
Pebp1	347	9.12624e-05	0.00148322	-0.00190746	0.187783
Dad1	348	6.07192e-05	0.00107565	0.195804	0.0168052
Gbp3	348	9.15689e-05	0.00148597	-0.32531	0.179829
Itpa	349	9.31652e-05	0.0015051	-0.190003	0.138872
Sirt2	350	6.12064e-05	0.00108075	0.124344	0.0565243
Pin1	350	9.34633e-05	0.00150623	-0.357812	0.209624
Anxa5	351	6.16727e-05	0.00108721	0.201345	-0.0794185
Nfic	351	9.35131e-05	0.00150623	-0.121215	0.142476
Mrpl44	352	6.37943e-05	0.00111552	0.102153	0.0606323
Casp3	352	9.64467e-05	0.00155039	-0.0238174	0.231591
Atp6ap1	353	6.6931e-05	0.00116286	0.161198	-0.0962053
Lamtor5	353	9.89778e-05	0.00158716	-0.312056	0.207102
Cd47	354	6.81573e-05	0.00117819	0.198697	0.00323238
Srm	354	0.000100832	0.00160983	-0.116049	0.204784
F2rl1	355	7.13379e-05	0.0012276	0.153894	-0.00604878
Rasef	355	0.000100843	0.00160983	0.068141	0.07635
Tle6	356	7.16364e-05	0.00123078	0.0581449	0.023608
Scara3	356	0.000100986	0.00160983	0.116533	0.13922
Zfp704	357	7.22655e-05	0.00123766	0.0842054	0.0419353
Sdhaf1	357	0.000101469	0.00161335	0.020052	0.0666382
Klc3	358	7.28627e-05	0.00124364	0.119377	0.071188
Echdc3	358	0.000106077	0.00166515	0.0157691	0.098991
Tbl1x	359	7.64503e-05	0.00129702	0.153136	0.060996
Nudt16l1	359	0.000106149	0.00166515	0.0436949	0.111677
Trps1	360	7.87659e-05	0.00132855	0.179872	0.0586084
Ndufa9	360	0.000107323	0.0016787	-0.136065	0.153414
Fyttd1	361	7.99463e-05	0.00134578	0.162048	0.0559723
Exoc6b	362	8.08634e-05	0.0013549	0.112934	0.00779445
Fabp5	362	0.000111393	0.00173484	-0.623349	0.187016
1110038F14Rik	363	0.000115066	0.00177794	-0.0452239	0.126698
Vps50	364	8.3261e-05	0.00138649	0.106709	0.0224963
Rnf168	364	0.000115145	0.00177794	-0.10235	0.0877026
Pak1ip1	365	8.46523e-05	0.00140749	0.180166	0.0977523
Lsm6	365	0.000115799	0.00178057	-0.31406	0.194108
Acads	366	8.75126e-05	0.00144442	0.114737	0.082765
Tap1	366	0.000115809	0.00178057	-0.217889	0.185284
Sec31a	367	8.99111e-05	0.00147231	0.165447	0.10778
Arrdc4	367	0.000119914	0.00183586	0.00068877	0.129496
Uba5	368	9.04422e-05	0.00147432	0.140789	0.0867382
Sdha	368	0.000123881	0.00188857	0.0491836	0.150168
Tnfrsf21	369	9.18752e-05	0.00148871	0.081619	0.021929
Mitd1	369	0.000125222	0.00190365	-0.0845817	0.138103
Sdhb	370	0.000125521	0.00190553	-0.447071	0.209823
Mrpl28	371	0.000125892	0.00190848	-0.314361	0.193403
Ufl1	372	9.6541e-05	0.00155039	0.0985265	0.0681202
Mafb	373	6.46072e-05	0.00112792	0.0842516	0.0904977
Zmym2	374	0.000100896	0.00160983	0.109767	0.043063
Polr2l	374	0.000129229	0.00194815	-0.0175868	0.160925
Sparc	375	0.000101541	0.00161335	0.211	-0.0907694
E2f4	375	0.000131651	0.00197916	-0.0186501	0.174539
Samd14	376	0.000101654	0.00161335	0.0805362	0.0514458
Abca2	376	0.000134249	0.00201541	0.0154894	0.0503872
Rtp4	377	0.000134596	0.00201782	-0.0822265	0.198159
Wdr61	378	0.000102089	0.0016167	0.152022	0.154709
Ten1	378	0.000140404	0.00209907	-0.116548	0.1533
Lpar2	379	0.000102164	0.0016167	0.0542982	0.0534934
Gsto1	379	0.000140708	0.0020991	0.017997	0.231462
Lrrc58	380	0.000103006	0.00162764	0.155587	-0.0259321
Ctxn1	380	0.000141701	0.00210973	0.05767	0.158768
Marcksl1	381	0.000103528	0.00163285	0.20929	-0.0587451
Mief2	381	0.000144471	0.00214801	0.00179569	0.038138
Wdr43	382	0.000104926	0.00165075	0.193276	0.131076
Amer1	382	7.29575e-05	0.00124364	0.100517	0.105418
Ptpn1	383	0.000106669	0.00167089	0.163079	0.0860591
Fxn	383	0.00014642	0.00216509	-0.128333	0.131054
Prdx1	384	0.000107732	0.00168267	0.172761	-0.080942
Sumo3	384	0.00014913	0.00219617	-0.318602	0.200733
Slc22a23	385	0.000107888	0.00168268	0.0591537	-0.0205646
Sf3b2	385	0.000149686	0.00220136	-0.0814246	0.216181
Sdc2	386	0.000112425	0.0017484	0.168549	0.00515675
Slc44a2	386	0.000150384	0.00220626	0.0360368	0.109021
Inafm2	387	0.000112898	0.00175325	0.0554814	0.037494
H2afx	387	0.000150427	0.00220626	-0.334775	0.137679
Txnrd3	388	0.0001143	0.00177246	0.0540594	0.0107725
Sap30	388	0.00015068	0.00220698	-0.0354669	0.119212
Eif3m	389	0.000114796	0.00177761	0.194226	0.00490209
Chd8	389	0.000153293	0.00223713	0.100683	0.14396
Ccs	390	0.000115508	0.00178057	0.147251	0.0691035
Anp32b	390	0.000154142	0.0022381	-0.676379	0.198698
Adh5	391	0.000154252	0.0022381	0.048751	0.184923
Acin1	392	0.000118193	0.00181463	0.17919	0.0634389
H2-DMa	392	0.000155415	0.00225195	-0.186514	0.24362
Esyt3	393	0.000119085	0.00182574	0.0453362	0.0170624
Telo2	393	0.000157597	0.00227748	0.0923461	0.106442
Gm42418	394	0.000120545	0.0018429	0.384667	0.0393324
Prps1	394	0.00015803	0.00228069	-0.0634913	0.162857
Tspan14	395	0.000121082	0.00184851	0.0991654	0.0192868
Leprotl1	395	0.000160884	0.00231263	-0.112621	0.183117
Kat2a	396	0.00016224	0.00232594	-0.0063417	0.104965
Ccl2	397	0.00012505	0.00190365	0.340771	-0.241542
Tia1	397	0.000165128	0.00235797	0.117704	0.155583
Ccdc86	398	0.000127011	0.00192275	0.169586	0.0721739
Nsmce3	398	0.000167112	0.0023769	-0.00215762	0.120432
Dnmt3a	399	0.000127779	0.00193167	0.0911742	-0.0219146
Mvb12a	399	0.000168504	0.00239042	-0.0607104	0.174966
Tns4	400	0.000128997	0.00194736	0.200702	-0.0277996
Psmd3	400	0.000169122	0.00239604	0.0474396	0.186032
Coasy	401	0.000172732	0.0024408	0.00228255	0.0976178
Col4a3bp	402	0.00013005	0.00195781	0.159272	0.00924504
Mettl5	402	0.000173245	0.00244486	-0.0456013	0.0755406
Rhoq	403	0.000135577	0.00202972	0.121154	0.0115553
C1qtnf12	403	0.000177019	0.00249161	0.098676	0.118842
Med13l	404	0.000140793	0.0020991	0.169273	-0.199775
Arpc5l	404	0.000179079	0.00251169	-0.157047	0.181988
Gpd2	405	0.000145669	0.00216286	0.139235	0.00701641
Efna4	405	0.000179446	0.00251271	0.0666666	0.0934864
Ly6a	406	9.25536e-05	0.00149746	0.299007	0.309249
Snrpa	406	0.000181573	0.0025294	-0.246377	0.166497
Hes6	407	0.000103637	0.00163285	0.0818935	0.0852082
Tipin	407	0.000182656	0.00253796	-0.529178	0.122574
Plec	408	0.00014596	0.00216306	0.197018	0.107784
Cdkn2c	408	0.000183618	0.00254627	0.108273	0.176697
Pex13	409	0.000146082	0.00216306	0.119116	0.101351
Selenon	410	0.000146799	0.00216774	0.0749116	-0.00782875
Apeh	410	0.000179914	0.00251601	0.0926337	0.102825
Trabd2b	411	0.000148967	0.00219617	0.0678136	0.00884999
Ptpru	412	0.000152095	0.00222469	0.0563125	0.0365535
Prdx3	412	0.00018568	0.0025668	-0.11325	0.158067
Esf1	413	0.000153358	0.00223713	0.167743	0.0628301
Med19	413	0.000186583	0.00257598	0.0514152	0.170518
Atp6v1e1	414	0.000153588	0.00223747	0.176391	-0.0478872
Chchd1	414	0.000190298	0.00261594	-0.300739	0.191893
Zfyve16	415	0.000153819	0.00223781	0.0891233	0.0163938
Echdc2	415	0.000190966	0.00261979	0.0839513	0.107253
Kdm2b	416	0.000156661	0.00226698	0.119326	0.0439175
Rnf7	416	0.000195636	0.00267369	0.072634	0.198593
Papss1	417	0.000159171	0.00229409	0.135334	0.00864848
Pex11b	417	0.000196692	0.00268474	0.020254	0.0878081
U2surp	418	0.000159542	0.00229639	0.175527	0.103228
C1qbp	418	0.000197317	0.00268725	0.00900024	0.208827
Smad3	419	0.000162022	0.0023259	0.12912	0.0140584
Echs1	419	0.000197373	0.00268725	-0.0207956	0.139326
Pex3	420	0.000163855	0.00234599	0.105345	0.0171023
Apobec3	420	0.000197905	0.00269112	-0.0156915	0.0806639
Golgb1	421	0.000164593	0.00235345	0.171416	-0.0495805
Ppih	421	0.000205468	0.00278695	-0.280751	0.123551
Ntf5	422	0.000166192	0.00236935	0.0598498	0.0442952
Mrpl12	422	0.000206803	0.00280155	-0.204622	0.198423
Zfp292	423	0.000166363	0.00236935	0.1419	0.135106
Pdcd4	424	0.000168172	0.00238883	0.0901766	0.012907
Eci2	424	0.00021243	0.00287213	0.114171	0.159021
Ttc5	425	0.000169618	0.00239993	0.0969813	0.0644952
R3hdm4	425	0.000214545	0.00289195	-0.0367619	0.145921
Mau2	426	0.000176944	0.00249161	0.141733	0.0365487
Setd6	426	0.000215405	0.00289802	-0.0272615	0.0999473
Camkk2	427	0.00017746	0.00249458	0.136559	0.109797
Pla2g16	427	0.000215531	0.00289802	-0.141793	0.218459
Pfkfb3	428	0.000179141	0.00251169	0.0704849	0.0354715
Sec23ip	429	0.000180499	0.00252093	0.0830818	0.0834694
Pfas	429	0.00021699	0.00291402	0.0164712	0.0603747
Creb3	430	0.000180943	0.00252388	0.136208	0.0909946
Sac3d1	430	0.000217324	0.00291488	0.0983707	0.150053
Ephb4	431	0.000182174	0.00253451	0.0981082	0.0309622
Zcchc4	431	0.000231528	0.00307492	0.0178976	0.0672771
Slc39a14	432	0.000183864	0.00254627	0.137793	0.0772106
Stx18	432	0.000234202	0.0030985	0.0449299	0.101554
Bmpr2	433	0.00018396	0.00254627	0.12441	0.0222156
Fam118b	433	0.000234448	0.0030985	-0.0400362	0.0861739
Nsfl1c	434	0.00018841	0.00259789	0.157287	0.115168
Prmt7	434	0.000237693	0.00313755	-0.0140671	0.117754
Dcaf8	435	0.000189586	0.00261079	0.119864	0.0714433
Tsen34	435	0.000238367	0.00313879	-0.264681	0.185152
Ece1	436	0.000190443	0.00261594	0.118109	-0.135228
Rpl9	437	0.000192628	0.00263925	0.114809	0.015885
Ndufaf4	437	0.000241812	0.00318028	0.131515	0.162401
Tle2	438	0.000193012	0.00264116	0.0336191	-0.0229143
Ppa1	438	0.000242725	0.00318842	-0.307924	0.214616
Nudt5	439	0.000248122	0.00323965	-0.192256	0.128061
Mbd3	440	0.000253375	0.00330247	-0.191227	0.191497
Il17re	441	0.000212544	0.00287213	0.0571856	0.0285699
Nup43	441	0.00025543	0.00332305	-0.0993007	0.0899394
Tmem165	442	0.000214216	0.00289111	0.168618	0.059825
Shtn1	442	0.00025625	0.00332572	0.0581236	0.108667
Pnisr	443	0.000218283	0.00292413	0.160382	0.101627
Snw1	443	0.000256725	0.00332789	0.0489325	0.19166
Tspan5	444	0.000221413	0.00296104	0.102808	0.0134846
Mex3a	445	0.000221586	0.00296104	0.139599	0.00969604
2210016L21Rik	445	0.0002637	0.00340607	-0.00433856	0.131037
Ptprf	446	0.000223519	0.00298319	0.12575	0.00292136
Sp110	446	0.000268989	0.00346611	-0.0272707	0.131648
Gnaq	447	0.000225742	0.00300916	0.132912	0.0134608
Phax	448	0.000226568	0.00301645	0.164338	0.117414
Rbm43	448	0.000273108	0.00350667	-0.0450402	0.09845
St5	449	0.000228145	0.00303371	0.0862222	0.0577845
Zfp930	449	0.000275482	0.00353295	0.0307846	0.0678746
Abi1	450	0.000232591	0.00308525	0.137164	-0.0464439
Mettl13	450	0.000281604	0.0036058	0.0583213	0.0748797
Zfp398	451	0.000233189	0.0030894	0.0671391	0.0401435
Phlda3	451	0.000284505	0.00363575	0.00574168	0.092513
Fbrs	452	0.000238105	0.00313879	0.0762295	0.0282029
Fam110c	452	0.000284947	0.00363711	0.137498	0.161209
Abhd13	453	0.000243102	0.0031895	0.110861	0.0869596
Trmt11	453	0.000287906	0.00365762	0.0374533	0.0838515
Nfe2l2	454	0.000243516	0.00319107	0.14504	-0.00584258
Eif4ebp1	454	0.000291415	0.0036849	-0.551321	0.212785
Frg1	455	0.000245115	0.00320813	0.170164	0.0548454
Rpp40	455	0.000293199	0.00370313	0.0175469	0.0473263
Lamb1	456	0.00024568	0.00321165	0.162817	0.079854
Mtfr1	456	0.000295892	0.00372587	-0.0499944	0.151501
H13	457	0.000253543	0.00330247	0.176942	0.0302625
Lrpprc	457	0.000296032	0.00372587	0.0905465	0.102408
Mphosph8	458	0.000256216	0.00332572	0.148692	0.08818
Serpina3g	458	0.000296984	0.00373351	-0.321096	0.15367
Ttc3	459	0.00020108	0.00273085	0.177565	0.191974
Ifitm3	459	0.000298877	0.00375296	0.0142115	0.185183
Wiz	460	0.000261658	0.00338373	0.0901683	0.0544472
Aasdhppt	460	0.000300332	0.00376686	0.0831508	0.153424
Mphosph10	461	0.000271013	0.00348804	0.160709	0.0793746
Orc2	461	0.00030304	0.00379642	-0.0639688	0.111921
Ankrd28	462	0.000271364	0.00348841	0.118723	0.0191661
Tgfbr1	463	0.000281828	0.0036058	0.121751	-0.0214998
Med29	463	0.000305864	0.00382736	0.0305456	0.135999
Rps24	464	0.000285756	0.00364314	0.118853	-0.0464263
Thyn1	464	0.000306539	0.00383139	-0.0870217	0.149283
Mycbp2	465	0.000286473	0.00364798	0.159128	-0.0227273
Atxn7l1	465	0.000310716	0.00387464	0.0813279	0.102651
Nfat5	466	0.000287325	0.00365453	0.172308	-0.272793
Oas1a	466	0.000311407	0.00387879	0.00492549	0.123423
Stk38l	467	0.00028878	0.00366442	0.0723882	0.0133463
Uqcr10	467	0.000311846	0.00387979	-0.468297	0.205835
Lap3	468	0.000314957	0.00391399	-0.119232	0.164955
Tlr2	469	0.000290249	0.00367876	0.090761	-0.0546709
Gtf3a	469	0.000316324	0.00392648	-0.140886	0.156763
Rpl18a	470	0.000290908	0.00368279	0.108055	0.00702345
Ruvbl1	470	0.000318054	0.00394343	0.00142018	0.169113
Rps28	471	0.00029428	0.00371245	0.1555	-0.0908943
Elob	471	0.000326675	0.00403184	-0.205117	0.184036
Maea	472	0.000309664	0.00386598	0.154741	0.118247
Cnot8	472	0.000332073	0.00408914	0.044652	0.119171
Tmem205	473	0.000320012	0.00396317	0.144139	0.0935428
Cxcl9	473	0.000338529	0.00416391	-0.663843	0.178803
Hacd3	474	0.000322092	0.00398437	0.0901792	0.0400972
Tmem9	474	0.000339793	0.00417471	0.109089	0.153034
Tomm22	475	0.000341118	0.00418516	-0.200687	0.189376
Bcl2l11	476	0.000326078	0.00402907	0.123851	0.0736264
Ttc4	476	0.000347638	0.0042566	0.0187515	0.0761422
Tnks2	477	0.000330557	0.00407512	0.17038	-0.00846362
Rfc1	477	0.000350122	0.00427734	-0.243107	0.137414
Fam58b	478	0.000353388	0.00431237	-0.00459485	0.082811
AW209491	479	0.000268112	0.00345893	0.0879908	0.0924083
Snhg20	479	0.000355086	0.00432821	0.050486	0.108429
Notch2	480	0.000341417	0.00418516	0.0813969	-0.00664564
Nme4	480	0.000369409	0.00448764	0.0430267	0.0970092
Gpr137b	481	0.000349643	0.00427632	0.171423	0.00974674
Atp23	481	0.000371782	0.0045114	0.0674986	0.0777702
Gpx4	482	0.000373197	0.0045235	-0.0401084	0.157374
Gbp4	483	0.000388107	0.00468847	-0.251147	0.20363
4930523C07Rik	484	0.00036397	0.00442653	0.222718	-0.340068
Tefm	484	0.00039074	0.00471502	0.0606611	0.0711036
Zfp266	485	0.000381176	0.00460989	0.124888	0.106945
Hook2	485	0.00039331	0.00473546	0.0715219	0.0927184
Srsf1	486	0.000394651	0.00474634	-0.154359	0.156565
Mak16	487	0.000396218	0.0047599	0.156089	0.0690456
Spast	488	0.000401136	0.0048083	0.120171	0.0993362
Bccip	488	0.000403461	0.00483083	-0.0132453	0.150582
Gmps	489	0.00040414	0.0048336	0.0619415	0.179354
Smim14	490	0.000415695	0.00496631	0.169807	-0.137145
Uri1	490	0.000417932	0.00498753	0.0975564	0.128799
Pwwp2b	491	0.00041899	0.00499466	-0.0594527	0.0756887
Mgat1	491	0.000422124	0.00501544	0.118342	0.0512728
Tmem87a	492	0.00042493	0.00504325	0.0866219	0.0177611
Srsf10	493	0.000419598	0.0049964	0.0465191	0.175158
Sbno1	493	0.000426016	0.0050506	0.125466	0.00465888
Wdr18	494	0.000421236	0.0050104	-0.0825291	0.153622
Stat3	494	0.000427002	0.00505675	0.150492	0.0581788
Scmh1	495	0.000427973	0.00506271	0.055978	0.124097
Tcf3	496	0.000431446	0.00509822	0.0353149	0.145947
Plekhs1	496	0.000391679	0.00472108	0.0685755	0.0694952
Psmb5	498	0.000434561	0.00512943	-0.0942941	0.194799
2510039O18Rik	498	0.00045216	0.00530822	0.115103	-0.0123653
Chrac1	499	0.000437695	0.0051608	-0.0867826	0.18067
Man2c1	499	0.000458506	0.0053619	0.061452	0.0335028
Tsen54	500	0.000440116	0.0051837	0.0582454	0.0750398
Prpf4b	500	0.000461717	0.00538537	0.162152	0.0679716
Phb2	501	0.000443458	0.00521738	-0.228102	0.19139
Zfp318	501	0.000466181	0.00542574	0.0847031	0.0479143
Mrps23	502	0.000446252	0.00524455	-0.02605	0.127511
Rae1	502	0.000473694	0.00549982	0.147202	0.149387
Wdyhv1	503	0.00045634	0.00535149	0.0445902	0.100625
B4galnt1	503	0.000476729	0.00552475	0.126851	0.0828103
Akr1b3	504	0.000456933	0.00535264	-0.149809	0.144184
Nfrkb	504	0.000489034	0.0056492	0.0748332	0.0152388
Slc29a1	505	0.000458714	0.0053619	0.0331155	0.151348
Spsb1	505	0.000491962	0.00567092	0.109281	0.0378117
Tmed9	506	0.000461707	0.00538537	0.129234	0.191269
Smim22	506	0.000500674	0.0057271	0.079719	0.0404687
Rex1bd	507	0.000462867	0.00539298	-0.196499	0.191251
Pdia6	507	0.000505456	0.00577116	0.203158	0.0106277
Enpp4	508	0.000473466	0.00549982	-0.0134968	0.100967
Tm2d2	508	0.000509807	0.0058147	0.15824	0.127999
Phf11d	509	0.00047407	0.00549982	-0.156019	0.135637
Anapc2	510	0.000510574	0.00581732	0.10236	0.0766562
Mrpl35	511	0.000481266	0.00557136	-0.148175	0.164942
Rbm47	511	0.000518092	0.00587822	0.118001	0.00951974
Nme7	512	0.00048673	0.00562859	-0.0224299	0.0841599
Marc2	512	0.00025927	0.00335687	0.165879	0.181614
Tnk1	513	0.000534616	0.00603776	0.0783643	0.0188434
Rbm17	514	0.000490335	0.00565819	0.0140335	0.183146
Ube2b	514	0.000534942	0.00603776	0.165906	-0.0428507
2310011J03Rik	515	0.000493201	0.00567305	0.0192106	0.135922
Rpl21	515	0.000535639	0.00603933	0.110058	-0.0303176
Dmac1	516	0.000493228	0.00567305	0.0290052	0.11893
Limd1	516	0.000538793	0.00606856	0.135349	-0.0639004
Ltbr	517	0.000493719	0.00567305	-0.024163	0.106962
Hs6st1	517	0.000542522	0.00608362	0.0978074	0.0480298
Taf1b	518	0.000498469	0.00571706	0.00975468	0.0552864
Vps28	518	0.00054776	0.00612474	0.142207	0.134453
Hmgn1	519	0.000498605	0.00571706	-0.426087	0.191127
Ctnnal1	519	0.000561112	0.00625487	0.138664	0.0419981
Fscn1	520	0.000500943	0.0057271	0.000543495	0.186954
Cdk7	520	0.000565139	0.00629328	0.10479	0.0550811
Bex3	521	0.000501069	0.0057271	-0.451439	0.209744
Ssbp3	521	0.000570804	0.00634983	0.104858	0.0538914
Pcolce	522	0.000575481	0.00638872	0.194163	-0.122274
Rpusd4	523	0.000512046	0.00582796	0.00138473	0.115438
Rassf9	524	0.000514068	0.00584483	0.0321204	0.0353571
Hyal2	524	0.000590106	0.00653099	0.105804	0.0497711
Gtpbp3	525	0.000517123	0.00587339	0.0204417	0.0665068
Bbx	525	0.00059601	0.00655611	0.143553	-0.0311023
Zranb2	526	0.000523387	0.00593209	-0.093265	0.165918
Aifm2	526	0.000597314	0.00656378	0.0746348	0.0352552
Ptpn6	527	0.000363033	0.0044201	0.0647729	0.0708157
Ctsl	527	0.000599284	0.00657561	0.222412	-0.353509
Rnf14	528	0.000530674	0.00600838	-0.0217207	0.0969745
Poldip2	529	0.000533361	0.00603249	0.0592236	0.140781
Tcea3	529	0.000618814	0.00675371	0.0719138	0.0264619
Ireb2	530	0.000620583	0.00676454	0.10713	0.0932825
Zbtb37	531	0.000539353	0.00606856	0.0470785	0.0549062
Rbm34	531	0.000623021	0.00678429	0.13969	0.0869237
Eml4	532	0.000540468	0.0060748	0.0677906	0.162613
Wdfy1	532	0.000632116	0.00685574	0.117239	0.0932658
Klhl36	533	0.000541226	0.006077	0.0466794	0.0533895
Myh10	534	0.000542939	0.00608362	-0.0439001	0.117591
Naca	534	0.000637167	0.00690122	0.109396	-0.0221538
Dnmt1	535	0.000544731	0.00609738	-0.260138	0.110589
Mapk3	535	0.00065186	0.00704868	0.126046	0.0613286
Plin2	536	0.000548307	0.00612474	-0.183588	0.184453
Cog8	536	0.000377949	0.00457597	0.108408	0.117357
Ptpn18	537	0.000556999	0.00621542	-0.161418	0.0939016
Tmf1	537	0.000656236	0.00708892	0.147422	0.0666573
Lipt1	538	0.00066399	0.00715839	0.0423316	0.0346991
Selenos	540	0.000677736	0.00729206	0.15345	0.0128848
Mphosph6	541	0.000574699	0.00638659	0.0195598	0.112413
Gnas	541	0.000690212	0.00739365	0.141952	-0.0612111
Stub1	542	0.000577245	0.00640175	-0.0999592	0.175858
Sptan1	542	0.000691277	0.00739365	0.126825	-0.035152
Hmgn2	543	0.000581654	0.00644404	-0.610516	0.188185
Sestd1	543	0.000693138	0.00740624	0.0998395	-0.029795
Slc35b2	544	0.000594129	0.00655611	-0.0110706	0.131086
Lamc1	544	0.000697251	0.00743552	0.132794	-0.00399096
St6galnac4	545	0.000594271	0.00655611	-0.0502308	0.0800422
Gm16124	545	0.00071977	0.00762309	0.0521753	0.0431012
Polr2g	546	0.000594341	0.00655611	-0.186997	0.175037
Snrpd2	547	0.000595786	0.00655611	-0.177322	0.189311
Maip1	548	0.000595895	0.00655611	0.000674352	0.115503
Hdgf	549	0.000599606	0.00657561	-0.482653	0.180428
Hipk3	549	0.00076014	0.00799587	0.0986424	0.0406089
Pdcd5	550	0.000603125	0.00660752	-0.284605	0.187737
Atp9a	550	0.000767797	0.00804121	0.103506	0.0158744
Stoml2	551	0.000609112	0.00666636	-0.154561	0.129587
Hspg2	551	0.000769737	0.00804988	0.11804	0.0376083
Itga3	552	0.00061646	0.00673997	-0.182978	0.172544
Slf2	553	0.000618965	0.00675371	-0.0776926	0.139977
Pja2	553	0.000774668	0.00809363	0.108909	0.069686
Pgp	554	0.000623855	0.00678654	-0.0268077	0.121177
Dab2ip	554	0.000790445	0.00823463	0.0996916	0.0735332
Naa10	555	0.000625833	0.00680122	-0.142892	0.141035
Espn	555	0.000398302	0.00477963	0.128033	0.137798
Gtf2a2	556	0.000626999	0.00680706	-0.374875	0.165242
Bach2	556	0.000809837	0.00842044	0.0588888	0.00119175
Fam69a	557	0.000815102	0.00845083	0.111597	0.0740449
Gps1	558	0.000637585	0.00690122	0.0731715	0.157555
Decr1	558	0.000836085	0.00864354	0.0663603	0.0625741
Psmb3	559	0.000661193	0.00713534	-0.231368	0.193638
Dcbld2	559	0.000842033	0.00868844	0.09378	-0.0284634
Fuca1	560	0.000675591	0.00727622	0.112239	0.129729
Nop56	560	0.000845616	0.00871272	0.181423	0.164299
Tmpo	561	0.000678488	0.0072929	-0.566883	0.128835
Dnpep	561	0.000849962	0.00873694	0.113567	0.0710845
Mtmr9	562	0.000681791	0.00732114	0.0213901	0.0405779
Atf7	562	0.000869728	0.00889786	0.0799471	0.0382276
Snrpg	563	0.000686193	0.0073611	-0.323954	0.190647
Gtf2i	563	0.000884721	0.00902565	0.12208	0.0954749
Cwf19l2	564	0.000694573	0.00741426	0.0564416	0.0956831
Nav2	564	0.000905466	0.0092026	0.163526	0.0510446
A530040E14Rik	565	0.000699865	0.00745604	-0.0176854	0.0382462
Cxadr	565	0.000911894	0.00925056	0.126969	0.0374493
Cavin2	566	0.000700749	0.00745812	0.0141144	0.102368
Samd4	566	0.000915091	0.00927429	0.0940435	-0.0840357
Fkbpl	567	0.000709324	0.00754197	0.0180494	0.0448303
1110008P14Rik	567	0.000940771	0.00947247	0.17208	0.162866
Shmt1	568	0.000711003	0.0075524	-0.100227	0.0691844
Zfp503	568	0.000951297	0.0095518	0.0956605	0.0476904
Zbtb18	569	0.000712724	0.00756325	0.0175139	0.0593083
Zfp281	569	0.000957561	0.00959845	0.0967616	0.0757005
Naa20	570	0.000713969	0.00756905	-0.0397521	0.177192
Tpd52l2	570	0.000961844	0.00962566	0.145614	0.11909
Ilvbl	571	0.000975087	0.00974547	0.0631082	0.0198575
Ak2	572	0.000724653	0.00766729	-0.191306	0.193351
Nucb1	572	0.000991979	0.00987781	0.114125	0.0384728
Ift81	573	0.000739142	0.00781296	0.00251487	0.0822641
Anapc4	573	0.00100385	0.00996852	0.126365	0.118177
Rnaset2a	574	0.000750936	0.00792744	-0.0536489	0.156552
Ebpl	575	0.000751437	0.00792744	-0.00278871	0.128893
Gdpgp1	575	0.00100837	0.00999501	0.0373518	0.028944
Spout1	576	0.000753543	0.00794115	0.00988382	0.0788179
Ngrn	577	0.000754204	0.00794115	0.0479221	0.107557
Ddx3x	577	0.00101397	0.0100414	0.157131	-0.00436527
Sfmbt2	578	0.00101694	0.0100615	0.0605577	0.0429716
Cad	579	0.00076135	0.00800083	-0.0645783	0.0614579
Kcnn4	579	0.00102123	0.010072	0.18121	0.0532639
Pus3	580	0.00076689	0.00804121	0.0684649	0.106939
Isg15	581	0.000767656	0.00804121	-0.119665	0.268835
Ddr1	581	0.00103783	0.0101845	0.0797743	0.0742269
2610528J11Rik	582	0.000768165	0.00804121	0.0160452	0.0289753
Vsig10	582	0.00104199	0.0102068	0.0915131	0.0314101
Gatad1	583	0.000776406	0.00810397	-0.109284	0.159911
Mmp13	584	0.0010836	0.0105475	0.160422	-0.226633
Cars2	585	0.000784734	0.00818301	0.023917	0.082304
Eef1d	585	0.00109549	0.0106495	0.145193	-0.0141164
Trim26	586	0.000801498	0.00834175	0.0200964	0.105021
Cep57l1	587	0.000811804	0.00843112	-0.0554985	0.0463223
Tead1	587	0.00110771	0.010734	0.122719	0.00705371
Igsf9	588	0.000812422	0.00843112	0.0376785	0.0756268
Zfp263	588	0.00111963	0.0108398	0.108645	-0.133576
Ezh2	589	0.000818719	0.00848021	-0.296605	0.12948
Eif3a	589	0.00116503	0.0112091	0.149165	-0.0319879
Smc1a	590	0.000823457	0.00852113	-0.232679	0.165215
Zfp113	590	0.00116958	0.0112369	0.0581596	0.054739
Rgs19	591	0.000839326	0.00866877	-0.0424333	0.0994221
Ice1	591	0.00117027	0.0112369	0.113598	0.0796615
Pecr	592	0.000845997	0.00871272	0.0461485	0.0874458
Tkt	592	0.00118134	0.0113258	0.162016	0.0336419
Cycs	593	0.000848552	0.00873073	-0.703536	0.185985
Hpcal1	593	0.00118479	0.0113388	0.12149	0.119268
Dgcr8	594	0.000852671	0.0087523	0.0562087	0.0846371
Ptk7	594	0.0011904	0.0113824	0.0713196	0.0147905
Pno1	595	0.000853074	0.0087523	-0.0155009	0.147796
Nlgn2	595	0.00119301	0.0113872	0.0489983	0.00338629
Samhd1	596	0.000856959	0.00878383	-0.122687	0.145042
Gng12	596	0.00120813	0.0115112	0.137544	0.0863895
Entpd7	597	0.000862714	0.00883446	0.0364301	0.0484417
Polr2b	599	0.00088092	0.00900385	0.0651809	0.100558
Col8a1	599	0.0012292	0.0116812	0.162701	0.0227247
Dis3	600	0.000881903	0.0090054	-0.0223058	0.0963608
Arl8b	600	0.00124081	0.0117709	0.115181	-0.102344
Klhl20	601	0.000886879	0.00903916	0.0243822	0.052682
Vkorc1	601	0.00125511	0.011896	0.102502	0.0453345
Mapk13	602	0.00089532	0.0091166	0.124159	0.148489
Akt1s1	603	0.000896921	0.00912432	-0.072429	0.132387
Enah	603	0.00129021	0.012146	0.101591	0.0758415
Mdp1	604	0.00091105	0.00925056	-0.000273944	0.0763762
Xpo7	604	0.00132363	0.0123937	0.108349	0.0739143
Spryd4	605	0.000917379	0.00928878	0.0501149	0.0572913
Ssh3	605	0.0013333	0.0124626	0.0510657	0.0148425
Pstk	606	0.000919704	0.00930362	0.00331949	0.0788423
Cyba	606	0.00133852	0.0125005	0.16126	-0.0378163
Tubgcp5	607	0.000922793	0.00932615	0.0461526	0.0554449
Dennd1b	607	0.00134215	0.0125237	0.0821399	0.0329934
Uap1	608	0.00135061	0.0125701	0.138783	-0.0278953
Suclg1	609	0.000930654	0.00939682	0.0849789	0.159287
Rfc2	610	0.000935453	0.00943649	-0.401559	0.107195
Pld3	610	0.00137796	0.0127917	0.064389	-0.0590235
Nagk	611	0.000938431	0.0094577	0.051005	0.102903
Cd24a	611	0.00138077	0.0127958	0.180235	0.163478
Bub3	612	0.000942041	0.00947645	-0.124291	0.15534
Mrpl43	612	0.000690981	0.00739365	0.144043	0.168411
Uap1l1	613	0.00138813	0.012853	0.110094	0.0446147
Setdb1	614	0.000950724	0.0095518	0.0698162	0.101621
Mtus1	614	0.00139088	0.0128674	0.0302958	0.0169444
Tomm7	615	0.000957717	0.00959845	-0.0544229	0.180697
Znrf1	615	0.00139678	0.0129109	0.136732	0.0495031
Pole2	616	0.00096221	0.00962566	-0.0130345	0.0252845
Pacs2	616	0.00141125	0.0130003	0.0654255	0.0204409
Dek	617	0.000985275	0.00983821	-0.725816	0.163691
Sspn	617	0.00143209	0.0131699	0.0615368	0.0367914
Nono	618	0.000986878	0.00984513	-0.0773719	0.172076
Sulf2	618	0.00143607	0.0131953	0.0546558	-0.0085703
Dpy30	619	0.000989592	0.00986311	-0.523441	0.169834
Zfp334	619	0.00146567	0.013399	0.054528	0.0485431
Psma1	620	0.000993043	0.00987932	-0.158148	0.180479
Itgb1	620	0.00148595	0.013553	0.148697	-0.225217
Kdm5c	621	0.00148772	0.0135548	0.0987068	0.0572243
Exosc5	622	0.00100372	0.00996852	-0.0352265	0.106421
Coro1b	622	0.00149957	0.0136169	0.13597	0.0895728
Ssrp1	623	0.00100815	0.00999501	-0.281193	0.162351
Pcgf3	623	0.00150586	0.0136626	0.116356	0.027545
Cdc123	625	0.00101891	0.0100687	-0.121398	0.145471
Zfp362	625	0.00152346	0.0137761	0.0397821	0.0194156
Kctd5	626	0.00101952	0.0100687	-0.000985092	0.10359
Bmyc	626	0.00153176	0.013828	0.0477002	0.0302891
Thoc3	627	0.00102218	0.010072	0.00135204	0.129286
Zc3h13	627	0.0015348	0.0138439	0.129254	0.0537541
Nt5c2	628	0.00102265	0.010072	0.06385	0.0965819
Rorc	628	0.00154828	0.0139539	0.041688	0.0284458
Fem1b	629	0.00102531	0.0100869	0.0354636	0.115077
Micall2	629	0.00154972	0.0139553	0.0610487	0.00622118
Akap11	630	0.00102602	0.0100869	0.0167424	0.095209
Rab11a	630	0.00155286	0.0139718	0.144933	0.131765
Mtx2	631	0.00103279	0.0101442	-0.0320295	0.150964
Vat1	631	0.00156327	0.0140305	0.132886	-0.062577
Galk2	632	0.00103944	0.010191	0.0295318	0.0756064
Syne2	632	0.00156627	0.0140387	0.127784	0.0145092
Mcm3	633	0.00104371	0.0102143	-0.341416	0.0655502
Krt7	633	0.00156874	0.0140387	0.207795	0.141871
Tmem35b	634	0.00104649	0.0102323	0.0415528	0.0493223
Gpi1	634	0.00157097	0.0140387	0.169384	-0.16116
Nap1l1	635	0.00105152	0.0102722	-0.347333	0.183688
Chd6	635	0.00158242	0.0141138	0.100307	-0.0247167
H3f3b	636	0.00107438	0.0104861	-0.0815443	0.123754
Il13ra1	636	0.00158297	0.0141138	0.11769	0.018093
Smarcd2	637	0.0010774	0.0104983	0.0228913	0.0986556
Nfkbil1	638	0.00107757	0.0104983	-0.0177833	0.0910739
Mvp	638	0.0015981	0.0142252	0.117855	0.0417205
Iars	639	0.00109605	0.0106495	-0.0068996	0.100354
Meis1	640	0.00110081	0.0106863	0.0251665	0.0827307
S100a1	640	0.00160571	0.0142634	0.144838	-0.00502042
Ppa2	641	0.00110558	0.010723	-0.108996	0.136414
Gpr137	641	0.00160635	0.0142634	0.0430222	0.00963401
Nudcd3	642	0.00112409	0.0108732	0.0194856	0.13591
Copa	642	0.00161054	0.0142889	0.129498	0.0537154
Zgpat	643	0.00162396	0.0143605	0.061667	0.0391921
2810001G20Rik	644	0.00112721	0.0108936	0.00101489	0.0409747
Arfgap1	644	0.00165878	0.0146329	0.081496	0.083046
Mrpl23	645	0.00113672	0.0109758	-0.13472	0.177281
Zfp825	646	0.00113803	0.0109786	0.027767	0.0455073
Lamb2	646	0.00173007	0.0151384	0.054432	-0.0232977
Sdhaf4	648	0.00114846	0.0110694	-0.0578798	0.117726
Gpatch4	649	0.00115957	0.0111666	-0.0299164	0.148235
Sgf29	650	0.00117103	0.0112369	-0.0422807	0.0682622
Ppp3ca	651	0.00177785	0.0154442	0.136149	-0.0592451
Atp5f1	652	0.0011838	0.0113388	-0.321285	0.182121
Fam160b1	652	0.00178093	0.0154585	0.0797339	0.0214292
Rrp1	653	0.00119232	0.0113872	-0.0345418	0.180032
Ctnnd1	653	0.00156116	0.0140232	0.107679	0.111894
Dtx3l	654	0.00120809	0.0115112	0.039767	0.105146
Gcc2	654	0.0013797	0.0127958	0.106842	0.11369
Ldb1	655	0.00183382	0.0158414	0.0831	0.026968
2410015M20Rik	656	0.00122811	0.0116812	0.0147065	0.172586
Tead2	656	0.00185492	0.0159854	0.0990896	0.0833907
Acad8	657	0.00122812	0.0116812	0.0104461	0.0554396
Myo1b	657	0.00189449	0.0162552	0.138603	0.0677416
Eva1b	658	0.00189872	0.0162593	0.0720786	0.0544824
Rabepk	659	0.00123347	0.0117114	-0.0805201	0.100266
Parn	660	0.00194258	0.0165693	0.0652524	0.0258164
Phgdh	661	0.00126322	0.0119624	-0.565258	0.141014
Pdia4	661	0.0019489	0.0166102	0.12637	0.0700592
Gdpd5	662	0.00127541	0.0120587	0.0512473	0.0777792
Syncrip	662	0.00195923	0.0166851	0.152396	0.162248
Asna1	663	0.00127561	0.0120587	-0.167512	0.139981
Kdm4b	663	0.00196148	0.0166911	0.0411858	0.023283
Btbd1	664	0.00127762	0.0120672	-0.0597313	0.137438
Nol8	664	0.0019634	0.0166943	0.111378	0.0176671
Uhrf2	665	0.00128197	0.0120977	0.100316	0.138982
Asap2	665	0.00196968	0.0167214	0.145467	-0.00793455
Bms1	666	0.00129017	0.012146	0.0668874	0.0952071
Snx18	666	0.00198229	0.0167632	0.0729282	0.0250172
Exosc3	667	0.00129073	0.012146	-0.0116355	0.118369
Phyh	667	0.00198452	0.0167632	0.108348	0.0290237
Ap2s1	668	0.0012922	0.012146	-0.115976	0.166438
Jmy	668	0.00198468	0.0167632	0.0847483	0.000416093
Ube3a	669	0.0012927	0.012146	0.00516602	0.172986
Sh3pxd2b	669	0.00198854	0.0167632	0.110552	0.113949
Apoo	670	0.00130754	0.0122748	-0.0609421	0.127977
Samd12	670	0.00199061	0.0167676	0.075586	0.0550631
Chchd6	671	0.00132362	0.0123937	-0.122695	0.111622
Sept11	671	0.00200978	0.0168504	0.15496	-0.031885
Ddx39b	672	0.00132364	0.0123937	-0.0377046	0.165801
Maz	673	0.00133271	0.0124626	-0.0495471	0.0884837
Tuba8	674	0.00134375	0.0125278	0.0382135	0.0531796
Enpp2	674	0.00203636	0.0170047	0.059457	-0.0850312
Xaf1	675	0.00134824	0.0125588	-0.183393	0.178155
Pkd2	675	0.00203814	0.0170047	0.121401	-0.0497418
Mrpl13	676	0.0013696	0.0127357	-0.94653	0.169736
March6	676	0.0020605	0.0171428	0.0769769	0.0198259
Sept6	677	0.00137076	0.0127357	0.0394028	0.108836
Trip12	677	0.00207193	0.0171983	0.129118	-0.0570742
Trappc6a	678	0.00208116	0.0172352	0.141667	0.0592491
Cox5b	679	0.00140012	0.0129214	-0.418159	0.17136
Yipf3	679	0.0020916	0.0173085	0.121912	0.0669875
1500011B03Rik	680	0.0014003	0.0129214	0.0139616	0.073561
Cry2	680	0.00209711	0.0173326	0.0397661	0.000372279
Dguok	681	0.00210886	0.0173981	0.0991276	0.0972033
Npepl1	682	0.001409	0.0129906	0.0037037	0.116155
Ctsb	682	0.00211787	0.0174459	0.160857	-0.169183
Uox	683	0.00143095	0.0131699	-0.0352152	0.148321
Btbd3	683	0.00150889	0.013665	0.0701755	0.0725249
Dirc2	684	0.00213002	0.0175326	0.0637677	-0.0145681
Fmc1	685	0.00144644	0.0132793	-0.167033	0.10432
Ap4e1	685	0.00213806	0.017572	0.033782	0.0229969
Nipsnap1	686	0.00144782	0.0132807	-0.00638953	0.114165
Ikbke	686	0.00214118	0.0175803	0.0455521	0.0241185
Ilkap	687	0.00145707	0.0133493	-0.0669166	0.136349
Ccdc115	688	0.00145777	0.0133493	0.0534636	0.0933971
1300002E11Rik	688	0.00221323	0.0180392	0.0518689	0.0281908
Sae1	689	0.00147651	0.0134867	-0.27736	0.125204
Il19	689	0.00226512	0.018379	0.0508918	0.0345679
Pkp3	690	0.00148627	0.013553	0.122471	0.146819
Mkrn1	690	0.00230858	0.0186617	0.120967	0.0281604
Tars	691	0.00149073	0.0135707	-0.284705	0.140565
Sigmar1	692	0.00149462	0.0135947	-0.0425143	0.106409
4932438A13Rik	692	0.00233263	0.018814	0.092435	0.0274771
Golga1	693	0.00149903	0.0136169	0.0303513	0.0792828
Yap1	693	0.00234797	0.0188955	0.100741	0.0429572
Tmsb10	694	0.00150811	0.013665	0.112413	0.146203
Nrp2	694	0.00235487	0.018937	0.161135	-0.18559
H1f0	695	0.00150991	0.013665	-0.475124	0.168401
Paip1	695	0.00236579	0.0189965	0.0959501	0.0319141
Socs2	696	0.00152647	0.0137918	0.00607721	0.0901484
Mfge8	696	0.00236922	0.0190099	0.145539	-0.0206754
Rwdd1	697	0.00156017	0.0140232	-0.376972	0.167149
Ddx10	697	0.00238374	0.019084	0.0959481	0.0852321
Syngr2	698	0.0015673	0.0140387	-0.12516	0.145048
Tor1b	698	0.00239112	0.019129	0.0842531	0.0628219
Igtp	699	0.00156957	0.0140387	-0.431586	0.169914
Atp6v0e	699	0.00241715	0.019266	0.138404	-0.128758
Anxa3	700	0.00157196	0.0140387	-0.0660086	0.193262
Ifi202b	700	0.00242504	0.0193124	0.163273	-0.0462437
Idh3a	701	0.00159444	0.0142043	-0.118991	0.126501
Nifk	701	0.0024301	0.0193124	0.136731	-0.0231055
Ly6e	702	0.00160568	0.0142634	0.00530428	0.205372
Stat5a	702	0.00245296	0.0194654	0.0597739	0.0456552
Hus1	703	0.00161855	0.0143482	0.0244222	0.0542244
Ahi1	704	0.00162016	0.0143497	0.000298913	0.0383959
Tbc1d10a	704	0.00252189	0.0199103	0.112094	0.0513083
Hint1	705	0.00162137	0.0143497	-0.750418	0.151631
Nav1	705	0.00253857	0.0200128	0.106615	0.0494346
Nelfa	706	0.00162524	0.0143605	-0.00354138	0.0831696
Ctns	706	0.00255909	0.0201451	0.0247545	0.0139347
Lzts2	707	0.00163926	0.0144725	0.0277372	0.119489
Cwh43	707	0.00146289	0.0133849	0.0592063	0.061074
Hdac2	708	0.00166111	0.0146416	-0.0445206	0.146655
Gss	708	0.002566	0.020166	0.0684103	0.0280857
Creb1	709	0.00167533	0.0147549	0.0539946	0.109635
Asah1	709	0.00257622	0.0201919	0.132655	-0.103769
Slc39a4	710	0.00167926	0.0147775	-0.0325428	0.109847
Mrpl15	711	0.00168255	0.0147944	-0.213208	0.135489
Ubr3	711	0.00264026	0.0205746	0.074839	0.00458979
Hsd17b10	712	0.00200522	0.016841	0.146116	0.159114
Ctnnbip1	713	0.00170626	0.0149907	0.109204	0.15658
Epm2aip1	713	0.00267377	0.0207631	0.0632422	0.0259212
Wdr74	714	0.00171608	0.0150648	0.0787739	0.117651
Slc17a5	714	0.00267404	0.0207631	0.054105	0.0255265
Rsbn1l	715	0.00171852	0.0150693	0.0289427	0.13454
Stx6	715	0.00268405	0.0208055	0.103577	-0.0407915
Supt7l	716	0.00171938	0.0150693	0.0268316	0.0563136
Anxa4	716	0.00271339	0.0209634	0.137308	-0.0460412
Mrps28	717	0.00172343	0.0150925	-0.201634	0.144909
Bnip3	717	0.0027293	0.0210413	0.091466	-0.168775
Dkc1	718	0.00173201	0.0151415	0.0134802	0.146581
Tm7sf3	718	0.00274861	0.02116	0.0681957	-0.0184263
Amotl1	719	0.00173322	0.0151415	0.0945656	0.165075
Sap30bp	719	0.00277496	0.0213174	0.0976292	0.0866861
Zfp511	720	0.00173518	0.0151465	-0.0121794	0.111788
Slc43a2	720	0.00279894	0.02147	0.0427288	0.0273096
Pigs	721	0.00174537	0.0152231	0.0454722	0.0870286
Clcn3	721	0.0028268	0.0216388	0.122023	-0.0262222
Ndufa8	722	0.00175071	0.0152574	-0.161177	0.167793
Arhgap8	722	0.00282985	0.0216469	0.0906799	0.0403789
Gemin7	723	0.00176362	0.0153576	0.0432864	0.137871
Sec61a2	723	0.00283781	0.0216788	0.0964278	0.043764
Ebp	724	0.00176514	0.0153584	0.0111121	0.13674
Has2	724	0.00283803	0.0216788	0.139567	-0.0700854
Tm2d3	725	0.00177095	0.0153966	0.0854854	0.122371
Dmp1	725	0.00284439	0.021712	0.055488	-0.0327525
Txn2	726	0.00180495	0.0156486	-0.172073	0.144969
Man1c1	726	0.00285025	0.0217274	0.0267495	0.00281409
Med9	727	0.00180571	0.0156486	-0.155874	0.106935
Nsmf	727	0.00285068	0.0217274	0.082636	0.00339399
Fam96a	728	0.00181422	0.0157097	-0.215291	0.131297
Cog3	728	0.00285242	0.0217274	0.0473968	0.00471213
Rnaseh2b	729	0.00182806	0.0158169	-0.119916	0.0807426
Zdhhc20	729	0.0028611	0.0217628	0.116942	-0.0581947
Dnajc19	730	0.00183278	0.0158414	-0.466087	0.130164
Dync1h1	730	0.00287969	0.0218582	0.130541	-0.00430785
Cpox	731	0.00184326	0.0159103	-0.00871258	0.0799366
Erbin	731	0.00288295	0.0218676	0.109663	-0.0922956
Lsm1	732	0.00184771	0.0159359	-0.0516659	0.162554
Pik3c2b	732	0.00290295	0.0219731	0.026476	0.0240817
Cwc27	733	0.0018655	0.0160638	-0.0111835	0.0830623
Gm26724	733	0.00295173	0.022218	0.0640731	0.0197221
Fam76b	734	0.00187313	0.0161166	-0.0232287	0.135295
Dnajc3	734	0.00296694	0.0223015	0.14022	0.087815
Sri	735	0.00188586	0.0162133	-0.0657534	0.16419
Prkcd	735	0.00298421	0.0224157	0.0937241	-0.0233482
Arpin	736	0.00189125	0.0162467	-0.072762	0.0673983
Dnajc11	736	0.00300548	0.0225442	0.0898601	0.0658424
Zfp846	737	0.00189666	0.0162552	0.040615	0.0684408
Fchsd2	737	0.00302546	0.0226627	0.0618646	0.0515928
Set	738	0.00189675	0.0162552	-0.232395	0.156326
Os9	738	0.00303499	0.0227184	0.10427	-0.0176625
Snrpc	739	0.00190861	0.0163311	-0.269385	0.162532
Tfb2m	739	0.00304581	0.0227774	0.0922324	0.0468772
Thg1l	740	0.00191289	0.0163548	-0.0120901	0.0803265
Sec22a	740	0.00194141	0.0165693	0.0738496	0.0778057
Gemin2	741	0.00193698	0.0165476	-0.0445	0.0495601
Ndufb6	742	0.00196546	0.0166987	-0.238779	0.162864
Rab11b	742	0.00319663	0.0237477	0.134451	0.0460456
Stat1	743	0.00197277	0.0167345	-0.251741	0.174615
Etl4	743	0.00320166	0.0237687	0.0551575	0.0123856
Aqr	744	0.00198046	0.0167632	0.068434	0.0986084
Raf1	744	0.00322823	0.0239331	0.0908826	0.0817286
Psme1	745	0.00198076	0.0167632	0.0523015	0.172435
Gabarapl2	745	0.00324347	0.0240132	0.13333	-0.0982858
Ncln	746	0.00198588	0.0167632	-0.00631649	0.0942872
Acadvl	746	0.00325731	0.0240992	0.106522	0.0288876
Dctd	747	0.0019877	0.0167632	-0.0369877	0.0853278
Fam8a1	747	0.00327079	0.0241494	0.0675402	0.0402304
Trim11	748	0.00199376	0.0167811	0.0542	0.070878
Ntmt1	748	0.00330297	0.0243496	0.119601	0.011761
Ccdc43	749	0.0020024	0.0168407	-0.0258439	0.0806149
Sqle	749	0.00331333	0.0243969	0.123635	-0.0824038
Tigd2	750	0.00200597	0.016841	0.0261786	0.0722943
Tgoln1	750	0.00332099	0.0244239	0.113303	-0.0990522
Zfp512	751	0.00200711	0.016841	0.00431099	0.0739066
Asb7	751	0.00332481	0.0244316	0.0477417	0.0219272
Txnip	752	0.00201412	0.0168737	0.0204075	0.0804395
Trp53inp1	752	0.00336055	0.0246774	0.0454251	-0.0251789
Rnf135	753	0.00203107	0.0170026	0.0252661	0.0646505
Fmnl2	753	0.00336417	0.0246873	0.0885373	0.0236949
Terf2ip	754	0.00203394	0.0170047	0.0365601	0.0822929
Timp2	754	0.00339472	0.0248441	0.154023	-0.200337
Ddx39	755	0.00203593	0.0170047	-0.133705	0.160239
Cib1	756	0.00203918	0.0170047	-0.0536721	0.106553
Ech1	757	0.00204128	0.0170091	0.115115	0.145276
Sf3b1	757	0.00343358	0.0250101	0.142725	-0.0366351
Snrpe	758	0.00206041	0.0171428	-0.476204	0.171212
Psd3	758	0.00344444	0.0250555	0.0414813	0.00175426
Plscr1	759	0.0020635	0.0171547	0.0748632	0.130006
Hipk2	759	0.0034624	0.0251355	0.0825017	-0.033305
Snrpd3	760	0.00206528	0.0171562	-0.154177	0.169818
Araf	760	0.00350091	0.0253538	0.0897655	0.0723105
Cnp	761	0.00207919	0.0172352	0.00196955	0.0965889
Six5	761	0.00350107	0.0253538	0.0277151	0.0117179
Rpap3	762	0.00208064	0.0172352	0.00133495	0.0645153
Shprh	762	0.00350933	0.025391	0.0595217	0.0539333
Ppp4r3b	763	0.00209772	0.0173326	0.044347	0.146851
Gm4117	763	0.00291189	0.0220052	0.0451003	0.0450416
Ndufs3	764	0.00210638	0.0173909	-0.189106	0.150593
Setd5	764	0.00358581	0.0258752	0.1265	0.0818946
Timm10b	765	0.00211546	0.0174392	-0.0919602	0.11579
Clip4	765	0.00359153	0.0258835	0.137474	-0.00377449
Bax	766	0.00213299	0.0175437	-0.245337	0.163992
Acpp	766	0.00359413	0.0258835	0.0344475	-0.0254437
Atm	767	0.00214232	0.0175803	-0.0148721	0.0535838
Ypel3	767	0.00365122	0.0262074	0.0719284	0.0223353
E130309D02Rik	768	0.0021499	0.0176292	0.0107667	0.100265
Adprhl2	768	0.00367938	0.0263571	0.0871582	0.0495932
Srbd1	769	0.00215499	0.0176575	-0.0418396	0.0325123
Aamp	769	0.00368673	0.0263923	0.133805	-0.0783539
Smc6	770	0.00215822	0.0176707	-0.265626	0.173286
Nup214	771	0.00216769	0.0177348	0.0247195	0.0841651
Rab2a	771	0.00373912	0.0267143	0.134026	0.056047
Alad	772	0.00217766	0.0178029	-0.21106	0.111702
Vdr	772	0.00375672	0.0268047	0.0622366	0.0115541
Dtx4	773	0.00375941	0.0268063	0.0299516	0.0117384
Psmg1	774	0.002182	0.0178248	-0.0305227	0.0825657
Copz2	774	0.00384029	0.0272931	0.0463028	0.0232496
Psma2	775	0.00218525	0.0178379	-0.00131781	0.172188
Rpl6	775	0.00384337	0.027297	0.0826524	0.0343713
Tirap	776	0.00220832	0.0180127	0.0701425	0.113368
St6gal1	776	0.00391727	0.027749	0.0544396	0.0277023
Tst	777	0.00224411	0.0182771	0.0482232	0.0626731
Scd2	777	0.00395062	0.0279487	0.113056	-0.0827306
Ulk3	778	0.00224867	0.0182948	0.0201956	0.0304107
Mkln1	778	0.00395475	0.0279596	0.108226	-0.0516421
Map3k14	779	0.00224967	0.0182948	0.00404376	0.0705125
Glmp	779	0.00396667	0.0280078	0.125903	-0.143431
Mad2l2	780	0.00225238	0.0183031	-0.0653743	0.0854714
Rpl7	780	0.00396946	0.0280078	0.0885178	0.0703599
Rad50	781	0.00225824	0.018337	-0.181155	0.107554
Pink1	781	0.00396951	0.0280078	0.0846855	-0.0101972
Golga4	782	0.00398136	0.0280562	0.131011	-0.0276995
Srsf9	783	0.00227118	0.0184144	-0.184603	0.143013
Zfp414	784	0.00228784	0.0185356	0.0100044	0.0671924
Eif3j2	784	0.00399709	0.0281303	0.097093	0.0372072
Mrps10	785	0.00229307	0.0185641	-0.130912	0.13031
Bola3	786	0.0023138	0.01869	-0.235448	0.121761
Pbx1	786	0.00405608	0.0285084	0.117703	0.0592239
Lypla2	787	0.00232021	0.0187278	0.0340667	0.106237
Mmp3	787	0.00406707	0.0285589	0.172415	-0.310891
Pelp1	788	0.00233621	0.0188288	0.0297583	0.088585
Tmem132a	788	0.00406853	0.0285589	0.117045	-0.0893851
Ubxn1	789	0.00234007	0.0188459	-0.0369451	0.165092
Sorl1	789	0.00408554	0.0286597	0.0642637	0.0331764
Pcnx4	790	0.00236006	0.0189646	-0.00525273	0.0827329
Tcf7l2	790	0.00409593	0.0287139	0.0836254	-0.0539465
Mrpl17	791	0.00237434	0.0190244	-0.192126	0.143779
Alg11	791	0.00414767	0.0289687	0.0624589	0.0611078
Shroom2	792	0.00237454	0.0190244	0.0369284	0.050135
Tcf4	792	0.00416419	0.029042	0.135137	0.0298841
Cnot6	794	0.00240243	0.0192052	0.0390716	0.128517
Ap1m2	794	0.00418444	0.0291644	0.0652591	0.0549414
Lgalsl	795	0.00240425	0.0192056	0.00819424	0.0779895
Ctr9	795	0.0041989	0.0292279	0.0816329	0.0604396
Gtf2h5	796	0.00241378	0.0192599	-0.247596	0.153493
Wbp4	796	0.00422054	0.0293405	0.128866	0.0861495
Mrpl57	797	0.00242937	0.0193124	-0.357079	0.130626
Myo1e	797	0.0042973	0.0298167	0.116201	-0.103073
Znhit6	798	0.00243005	0.0193124	0.114279	0.133814
Rpgr	799	0.00245138	0.0194654	0.035452	0.0487822
Gpm6b	799	0.00433216	0.0300392	0.0591394	0.0366338
2510002D24Rik	800	0.0024659	0.0195537	0.0128539	0.105535
Hk2	800	0.00437428	0.0302732	0.0962823	-0.0103998
Ndufaf6	801	0.00247331	0.0195981	-0.102303	0.0633536
Wls	801	0.00441034	0.0304254	0.125288	-0.185403
Tepsin	802	0.0024759	0.0196043	0.0252225	0.038758
Rdh10	802	0.00441317	0.0304256	0.115465	0.0025727
Amz2	803	0.00247849	0.0196105	-0.0830793	0.0989524
Foxp4	803	0.00442963	0.0304808	0.0913085	0.0612646
Mrps2	804	0.00241461	0.0192599	0.0546775	0.0630601
Srsf6	804	0.00444137	0.0305422	0.139873	0.0194193
Dync1li2	805	0.00251328	0.0198662	0.078735	0.110962
Sfrp1	805	0.00229854	0.0185944	0.139364	0.150672
Gm46430	806	0.00251447	0.0198662	0.0151996	0.0338235
Rab9	807	0.0025352	0.0200007	0.0417061	0.10333
Erlec1	807	0.0045209	0.0309531	0.0987464	0.00429667
Mrps15	808	0.00255295	0.0201115	-0.212283	0.138859
Ltbp1	808	0.00454884	0.0311034	0.123903	-0.192638
Ndufb11	809	0.00256183	0.0201521	-0.0950241	0.159273
Diaph2	809	0.00456376	0.0311857	0.0728571	0.0235455
Zfp599	810	0.00256733	0.020166	0.0493345	0.0618315
Pdcd2	810	0.00457417	0.0312292	0.0986691	0.0616006
Prr12	811	0.00257074	0.0201781	0.0125311	0.043948
Mindy2	811	0.00466379	0.031749	0.0772832	-0.021223
Dars	812	0.00257425	0.0201911	-0.063382	0.109486
Tecr	812	0.0046849	0.0318383	0.146382	0.122797
Ly96	813	0.00471657	0.0319514	0.0586727	0.00621154
Uchl3	814	0.00259695	0.0203315	-0.307525	0.148856
Plpp6	814	0.00471824	0.0319514	0.0509606	0.0381143
Dhrs13	815	0.00259779	0.0203315	-0.00923659	0.0592592
Reep3	815	0.00472009	0.0319514	0.123854	-0.132298
Macf1	816	0.00260245	0.0203381	0.0869447	0.120673
Pdlim5	816	0.00473157	0.0320039	0.112876	-0.130414
Unc119	817	0.00260289	0.0203381	0.0424291	0.100611
Uhrf1bp1	818	0.00260427	0.0203381	0.0186207	0.0367318
Hif1a	819	0.00261958	0.020443	0.0907716	0.143362
Odaph	819	0.00478241	0.0322723	0.0668598	0.0162495
Supt16	820	0.00262186	0.020446	-0.0673584	0.133383
Nme5	820	0.00480405	0.032378	0.0282001	0.00709922
Mettl18	821	0.0026609	0.0207206	0.00322835	0.024697
Nans	822	0.00266548	0.0207413	-0.245385	0.124504
Ikbkb	822	0.00485186	0.0326189	0.103344	-0.00395404
Dcbld1	823	0.00267964	0.0207917	0.0408779	0.0780073
Klhl42	823	0.00397191	0.0280078	0.0588235	0.0594539
Hnrnpab	824	0.00268527	0.0208055	-0.348973	0.154624
Lypd3	824	0.00494268	0.0331267	0.114975	-0.212845
Rhebl1	825	0.00268976	0.0208254	-0.00627943	0.0476718
Gna12	825	0.00498984	0.0334014	0.0554437	0.0360206
Dnajb14	826	0.0026948	0.0208495	0.0486386	0.0887577
Pgk1	826	0.00503093	0.0336348	0.183122	-0.254048
Insl6	827	0.00270278	0.0208963	0.117912	0.164596
Wwc2	827	0.00509465	0.0340188	0.123448	0.0482989
Enoph1	828	0.00272107	0.0210078	0.0117974	0.0893287
Nipa2	829	0.00272875	0.0210413	0.0230852	0.112008
Zfp229	829	0.00519694	0.0345739	0.0300679	0.0238875
Smg5	831	0.00273656	0.0210822	-0.0271561	0.0846425
Mrps30	831	0.00372105	0.0266028	0.0970308	0.103272
Notch3	832	0.00524491	0.0348502	0.0279347	0.016241
Crlf3	833	0.00276364	0.0212606	-0.0569874	0.0893223
Zfp933	833	0.00529789	0.0351375	0.0261658	0.00715616
Sc5d	834	0.00276984	0.0212932	-0.026288	0.0911586
Crim1	834	0.005335	0.0353187	0.0785841	-0.00416966
Ankrd26	835	0.00278296	0.0213636	-0.0600631	0.0633116
Pdlim2	835	0.00534429	0.035337	0.096203	0.0878967
Cdca7	836	0.00280078	0.02147	-0.0644012	0.0739225
Faah	836	0.00267399	0.0207631	0.0350648	0.036414
C1d	837	0.00280669	0.0215001	-0.039	0.137759
Prss22	837	0.00542652	0.035815	0.172837	0.138577
Ncbp2	838	0.0028567	0.0217447	-0.112077	0.112169
Zscan26	838	0.00544127	0.0358705	0.0389125	0.00812268
Iqgap2	839	0.00287688	0.0218582	0.0236113	0.0370241
Nktr	839	0.00550193	0.0361146	0.134244	0.0434397
Hspa14	840	0.00287783	0.0218582	-0.119956	0.0830103
Zfp282	841	0.00288523	0.0218696	0.0426776	0.0609449
Acadsb	841	0.00553696	0.0363005	0.0690181	0.0565037
Coil	842	0.00289841	0.0219541	-0.00600036	0.0443748
Phf5a	843	0.0029093	0.0220052	-0.24446	0.140065
Stx5a	843	0.00555942	0.0364256	0.108973	-0.023858
Rnpep	844	0.00291329	0.0220052	-0.0854723	0.105911
Lrch3	844	0.0055708	0.0364781	0.0814831	0.0295887
Ppp1r7	845	0.00291652	0.0220143	-0.0778326	0.0906698
Crip1	845	0.00559488	0.0366136	0.16192	-0.250908
Pdcd11	846	0.00566492	0.0369602	0.0864181	0.0438891
Msh2	847	0.00294677	0.022218	-0.0334446	0.0796976
Slc4a4	847	0.00567082	0.0369765	0.0264503	0.02445
Sema4c	848	0.00294799	0.022218	0.0153343	0.0653291
Ebna1bp2	849	0.0029514	0.022218	-0.0457418	0.163952
Mat2b	849	0.00576055	0.0373928	0.0961706	0.088208
Nfu1	850	0.00295602	0.0222348	-0.412528	0.115955
Tm9sf3	850	0.00577739	0.0374682	0.139704	0.0487805
Grpel1	851	0.0029915	0.0224549	-0.0274665	0.157275
Dtnbp1	851	0.00581773	0.0376171	0.103376	0.0328324
Cth	852	0.00585228	0.0377504	0.0619166	0.0349606
Cdca7l	853	0.00301584	0.0226063	-0.0400485	0.0645493
Tcf20	854	0.0058866	0.0379491	0.0677008	0.0570108
Flad1	855	0.00304709	0.0227774	0.0256197	0.0557462
Col16a1	855	0.00590189	0.038025	0.0643661	-0.0305386
Morc4	856	0.0031062	0.0232033	0.0564685	0.129177
Tmem50a	856	0.00596485	0.0383827	0.131375	-0.0561971
Sugp1	857	0.00310872	0.023206	0.0713648	0.090711
Ksr1	857	0.00605813	0.0389158	0.0501997	0.0375707
Pyroxd2	858	0.00607879	0.0389994	0.0244102	0.0129661
Phb	859	0.00313365	0.023376	-0.0665779	0.136815
Zc2hc1a	859	0.00608556	0.0389994	0.0863989	0.0274256
Nthl1	860	0.00313711	0.0233858	0.0193191	0.0511289
Fam173a	860	0.00609722	0.0390511	0.116491	0.103752
Fbxo5	861	0.00314561	0.023418	-0.141691	0.0193393
Riok1	861	0.00614214	0.0392459	0.0988308	0.0250774
Dmd	862	0.00314577	0.023418	0.0413413	0.0529133
Man1a	862	0.00616152	0.0393233	0.130336	-0.257437
Dynlt1f	863	0.00315487	0.0234696	-0.302948	0.0798183
Tspyl1	863	0.00628009	0.0398451	0.0744127	0.00617818
Tigar	864	0.00317455	0.0235998	0.0169827	0.036779
Gskip	864	0.00631692	0.0399617	0.0937492	0.0846522
2300009A05Rik	865	0.00321189	0.0238283	0.0262635	0.0888585
Thoc2	865	0.00632587	0.0399715	0.109112	-0.00413824
Gins1	866	0.0032349	0.0239662	-0.145687	0.0334627
Enpp5	866	0.00636577	0.0401533	0.0504164	0.0194171
Mul1	867	0.00326188	0.0241165	0.0531683	0.0889852
Tmbim6	867	0.00640427	0.0403257	0.139668	-0.0212988
Ajuba	868	0.00326655	0.0241345	0.0536508	0.0709986
Npr2	868	0.00642171	0.0404119	0.021611	0.0137003
Fkbp4	869	0.0032785	0.0241899	-0.0244965	0.167523
Rpl11	869	0.00642681	0.0404206	0.0821698	0.0626554
Psma7	870	0.00330465	0.0243496	-0.0155284	0.134103
Cyp4f13	870	0.00643068	0.0404214	0.0413698	0.0158688
Fto	871	0.00643912	0.0404279	0.0812214	0.0341522
Tsc22d4	872	0.00332151	0.0244239	0.0651368	0.113058
Hps6	872	0.00643918	0.0404279	0.0421565	0.0159823
Ubxn7	873	0.00644817	0.0404609	0.068368	-0.00826968
Cotl1	874	0.00336725	0.0246932	0.0950489	0.138313
Ctsc	874	0.00645774	0.0404975	0.0735054	0.0480461
Hnrnpa1	875	0.00338626	0.0248157	-0.169122	0.161327
Prmt2	875	0.00654119	0.0408879	0.0963043	0.0576695
Hacd4	876	0.00339291	0.0248441	0.0592028	0.0708384
Serpinb8	876	0.00656886	0.0410042	0.0214911	0.0122308
Heatr1	877	0.00673636	0.0419289	0.0652067	-0.00698729
Cyc1	878	0.00340978	0.024923	-0.391866	0.13909
Faap20	879	0.0034101	0.024923	-0.0949365	0.0887109
Unc50	879	0.00679705	0.0421977	0.104325	0.0609124
Psmd13	880	0.0034169	0.0249558	-0.142946	0.124569
Zbtb8a	880	0.00679798	0.0421977	0.0450235	0.0355166
Aup1	881	0.00342161	0.0249626	-0.120507	0.120664
Ptprj	881	0.0068063	0.0422137	0.0529523	-0.00903917
Fam98b	882	0.00342244	0.0249626	0.0197293	0.0832472
Ckb	882	0.00681908	0.0422494	0.0283777	0.027375
Coa3	883	0.00343143	0.0250101	-0.213844	0.130501
Uqcrc2	883	0.00580881	0.0375933	0.115521	0.119699
Gstk1	884	0.00343993	0.0250396	0.00158534	0.0232539
Smad5	884	0.0069496	0.0428374	0.0881288	-0.00694778
Ptma	885	0.00345373	0.0250898	-0.454105	0.101342
Fgfrl1	885	0.00698778	0.0430237	0.0564299	-0.0208383
Mrm3	886	0.00345379	0.0250898	0.0229945	0.0608425
Rab27b	886	0.00701507	0.0431672	0.0729255	0.0469716
Gosr2	887	0.00348235	0.0252634	0.0114619	0.0956621
Snd1	887	0.00702209	0.0431858	0.078262	-0.00781046
Ift20	888	0.00350184	0.0253538	-0.111924	0.127176
Arvcf	888	0.00709249	0.0434479	0.0356146	0.0250753
Gipc1	889	0.00354521	0.0256335	-0.0506416	0.113669
Son	889	0.00709279	0.0434479	0.12588	-0.0649703
Acot1	890	0.00354884	0.0256426	0.0295082	0.0370569
Mettl1	891	0.00358129	0.0258598	-0.0517109	0.105031
Bloc1s4	891	0.00716894	0.0438399	0.105138	-0.0121404
Ccdc25	892	0.00359344	0.0258835	-0.0796144	0.0906501
Cyth1	892	0.00723242	0.0441035	0.0374747	0.00315406
Dscr3	893	0.00360032	0.0259108	0.022434	0.0696438
Rtkn	893	0.00732624	0.0445383	0.0887277	0.0657134
Zfyve19	894	0.00360348	0.0259163	0.0223111	0.0583171
Smg8	894	0.00732842	0.0445383	0.0496304	0.036059
Romo1	895	0.00361497	0.0259817	-0.0097334	0.150987
Samm50	896	0.00364806	0.0262021	-0.168369	0.115644
Mcur1	896	0.00737088	0.0447211	0.0670336	-0.0298018
Slc39a10	897	0.00366179	0.0262659	-0.0754178	0.0456574
Ifnar1	897	0.00740549	0.0449059	0.07164	-0.0140373
Golph3l	898	0.00367515	0.0263442	0.0326296	0.0443615
E430024I08Rik	898	0.0074538	0.0451483	0.0346787	0.0151662
Zdhhc7	899	0.00369965	0.0264673	0.0492954	0.0704004
Nos2	899	0.00747706	0.0452132	0.131571	0.0226888
Pds5a	900	0.00749452	0.0452716	0.103941	0.0822021
Asb13	901	0.00375484	0.0268047	0.00399242	0.0496636
Lgr4	901	0.00500186	0.0334611	0.0356625	0.03635
Alg6	902	0.00376588	0.0268347	0.00119117	0.0281887
Bzw1	902	0.00755763	0.0455224	0.131913	0.0150547
Scand1	903	0.003782	0.0269318	-0.0959357	0.153086
Atraid	903	0.00765852	0.0460401	0.111219	-0.00469064
Mybbp1a	904	0.00380411	0.0270715	0.0238134	0.137841
Smo	904	0.00771113	0.0462155	0.0785957	0.0713483
Sephs1	905	0.00382216	0.027182	0.0499891	0.0880347
Arfgef1	905	0.00773043	0.0462799	0.0980849	0.0235169
Scamp1	906	0.00775027	0.0462963	0.0635429	-0.0109809
Rpl38	907	0.00779193	0.0465195	0.105701	0.0640571
H2afy	908	0.00387815	0.0275259	-0.146013	0.159036
Glg1	908	0.00785516	0.0468195	0.10778	-0.0133243
Atp1a1	909	0.00786662	0.046862	0.133165	-0.141185
Ankrd22	910	0.00389281	0.0276119	0.0223035	0.0285435
Camk2n1	910	0.0079245	0.0471031	0.0648523	0.0123588
Arhgef16	911	0.00389988	0.027644	-0.0115669	0.0708325
Eif4a1	912	0.00393207	0.0278357	0.085037	0.129698
Ezh1	912	0.00807928	0.0477348	0.0530997	0.046025
Esrp1	913	0.00398532	0.0280658	0.022617	0.0946321
3830417A13Rik	913	0.00774481	0.0462893	0.0204998	0.0192999
Enkd1	915	0.00404209	0.0284286	-0.107938	0.0550573
Insig2	915	0.00813306	0.0480263	0.107513	0.0402329
Fam213a	916	0.00814749	0.0480591	0.130303	-0.165504
Yif1b	917	0.00411668	0.0288407	-0.077844	0.126067
Nbeal1	917	0.00823442	0.0484135	0.0812364	-0.0186725
Steap1	918	0.00412104	0.0288526	-0.0323952	0.0774248
Xrn1	918	0.00828009	0.0486293	0.0871185	0.0627685
Rnf2	919	0.00828853	0.0486524	0.0763014	0.0271832
Psma6	920	0.00413101	0.0289037	-0.188974	0.164645
Tgfbi	920	0.00829995	0.0486667	0.0520849	0.0283029
B9d1	921	0.00414023	0.0289495	-0.116545	0.0974983
Slc10a7	921	0.00837486	0.0490527	0.0512829	0.0381976
Chmp2a	922	0.00414833	0.0289687	0.129077	0.156736
Steap2	923	0.00416301	0.029042	-0.0425044	0.10203
Cul7	923	0.00848393	0.0496272	0.0474648	0.0445374
Prpf40b	924	0.00848993	0.0496272	0.0318691	0.0135467
Tpgs2	925	0.00419894	0.0292279	-0.0346764	0.0497658
Atg13	925	0.00852417	0.0497657	0.0472914	-0.0248934
Col4a1	926	0.00861618	0.0502216	0.0955482	-0.0168197
R3hcc1	927	0.00420826	0.0292739	0.0321762	0.0648512
Uhmk1	927	0.00864156	0.0503199	0.066843	0.0249081
Taf10	928	0.00428353	0.0297592	-0.352236	0.139094
Gopc	928	0.00437788	0.0302759	0.0686109	0.075129
Exoc3	929	0.00429602	0.0298167	0.053267	0.0937779
Dgka	929	0.00882461	0.0509991	0.0498887	0.0144594
Ccdc68	931	0.00434024	0.030076	0.0656035	0.0985369
Stxbp2	931	0.00887228	0.0511827	0.0864786	0.0833265
Ccdc71	932	0.00436411	0.0302221	0.0219995	0.0823651
Dyrk2	932	0.00887923	0.0511827	0.0457893	0.0251461
Ankrd46	933	0.00438028	0.0302759	0.018429	0.0489098
Shq1	933	0.00888037	0.0511827	0.0401167	0.0265635
Taf1c	934	0.00893322	0.0513185	0.0368496	0.0213353
Sys1	935	0.00440051	0.0303804	-0.115078	0.154132
Zbtb33	935	0.00894024	0.0513185	0.0411902	0.00323535
Nlk	936	0.00440101	0.0303804	0.0445606	0.0537667
Nop2	936	0.00894185	0.0513185	0.0906007	0.0335024
Zmat2	937	0.00442039	0.0304453	-0.0736353	0.136648
Usp1	938	0.00442166	0.0304453	-0.441029	0.111168
Nexn	939	0.00445469	0.0306143	-0.0404843	0.0234651
Ncor1	939	0.00896198	0.0513555	0.122168	0.100773
Cgn	940	0.00446452	0.0306624	0.0162292	0.0583853
Msantd4	940	0.00897069	0.0513555	0.0703918	0.031849
Flnc	941	0.00897587	0.0513555	0.109682	-0.268032
Snrpf	942	0.00451186	0.030947	-0.48608	0.155612
Stambp	942	0.0090518	0.0515989	0.0522982	0.035565
Ndufb2	943	0.00451269	0.030947	-0.038657	0.139011
Cpe	943	0.00905268	0.0515989	0.130266	-0.0673721
Ipo11	944	0.00451454	0.030947	0.0371249	0.0495478
AI467606	945	0.0045223	0.0309531	0.024214	0.0537616
Fgfr1	945	0.00908541	0.0517309	0.0356316	-0.0284946
AI987944	946	0.004524	0.0309531	-0.00487062	0.0298473
Cyhr1	946	0.00911119	0.051796	0.0559516	0.0301949
Bud23	947	0.0045759	0.0312292	-0.0405265	0.0911595
Itgb6	947	0.00916441	0.0520165	0.0495466	0.0221243
Il17rd	948	0.00918401	0.0520732	0.0271142	0.0228358
Cep295	949	0.00464247	0.0316636	-0.050143	0.0703214
Rcbtb2	950	0.00466013	0.031749	0.00621972	0.065833
Adgrg6	950	0.00937122	0.0529682	0.0732893	-0.0592896
Syt12	951	0.00466166	0.031749	-0.00905264	0.0354593
Dvl3	951	0.0094146	0.0531664	0.0617507	-0.00521808
Ndufc1	952	0.00468475	0.0318383	-0.367906	0.138466
Timm29	952	0.0094161	0.0531664	0.0645243	0.0303182
Nedd8	953	0.00468573	0.0318383	-0.163144	0.148956
Trip10	953	0.00949056	0.0534752	0.0913768	0.0582591
Hdhd5	954	0.00952752	0.0536555	0.0215657	0.00808208
Fancl	955	0.00469733	0.031897	-0.116007	0.0533676
Tsr1	955	0.00960713	0.0539075	0.103799	0.0957881
Pgls	956	0.00470272	0.0319136	-0.0367944	0.152663
Bckdha	956	0.00970432	0.0543402	0.0668816	0.00402021
Ulk2	957	0.0097386	0.0544195	0.0627097	0.0355084
Rrp36	958	0.00471538	0.0319514	0.0207116	0.070352
Gnl3	958	0.00980152	0.0546301	0.129004	-0.20697
Ska2	959	0.00473584	0.0320039	-0.0939746	0.0448101
Lpcat3	959	0.00984757	0.0548021	0.0607712	0.00690593
Uqcrc1	960	0.00473671	0.0320039	-0.16785	0.161474
Ywhaq	960	0.00987735	0.0549114	0.127231	0.0204944
Hmgn3	961	0.00476631	0.0321837	-0.330458	0.123477
Dsc2	961	0.00990319	0.0550268	0.0341435	-0.00547785
Vps36	962	0.00480348	0.032378	-0.126714	0.109055
Pitpnc1	962	0.00991816	0.0550817	0.0630177	-0.0170261
Eif2s1	963	0.00482366	0.032484	-0.20027	0.151559
Pik3r1	963	0.010021	0.0555078	0.0602542	0.00676326
Mtch2	964	0.00482579	0.032484	-0.138986	0.147778
Hcfc1r1	964	0.0100985	0.0558542	0.139809	-0.103409
Dffb	965	0.00483375	0.0325174	0.0183531	0.0401335
Fgfr2	965	0.0101122	0.0559014	0.039683	0.0163368
Capn10	967	0.0048998	0.0329208	-0.0276691	0.0598787
Stt3a	967	0.0102254	0.0563827	0.122198	0.0228191
Sgk3	968	0.0102472	0.0564455	0.0394362	0.034779
Rab8a	969	0.00490745	0.0329518	0.0570683	0.117315
Rtn4	969	0.0102551	0.0564605	0.112976	-0.143832
Abhd17a	970	0.00491345	0.0329716	-0.117431	0.112653
Rilpl1	970	0.0102966	0.0566602	0.0308438	0.00199279
Dusp12	971	0.00492617	0.0330365	0.0285542	0.0730245
Prkra	971	0.0103046	0.0566753	0.0597147	0.0469461
Setx	972	0.00495515	0.0331897	0.0451559	0.0915326
Mdn1	972	0.0103203	0.0567328	0.0831531	0.032863
Gm4951	973	0.0050485	0.0337314	-0.0407252	0.0761188
Grpel2	973	0.00817307	0.0481837	0.0866058	0.0902785
Mrps33	974	0.00511474	0.0341319	-0.022005	0.146854
Rnf8	974	0.0103736	0.0569491	0.0748495	0.0189783
AW112010	975	0.00512515	0.0341676	0.0558877	0.22346
Slc11a2	975	0.0104693	0.0574063	0.0624858	-0.00632231
Got2	976	0.00512659	0.0341676	-0.143307	0.133428
Col4a2	976	0.0105026	0.057536	0.0868758	0.0393671
Dohh	977	0.00512956	0.0341676	-0.154785	0.12669
2310022B05Rik	977	0.0105036	0.057536	0.0642478	0.0161699
Cfap97	978	0.00518617	0.0345235	0.0270331	0.0648277
Ythdf3	978	0.0105863	0.0579305	0.0867115	0.0378717
Ahnak2	979	0.010645	0.0581929	0.138627	-0.119547
Uqcrfs1	980	0.00521472	0.0346708	-0.10058	0.151867
Agap1	980	0.0106573	0.058201	0.0694083	0.0448284
Smpdl3b	981	0.00526482	0.034961	-0.0958001	0.0588075
Rbm5	981	0.0107219	0.058436	0.11352	0.0584125
Mcm6	982	0.00527355	0.0349975	-0.380605	0.0854332
Kat6a	982	0.0108281	0.0589438	0.0938217	0.0494211
Marveld1	983	0.0053157	0.035234	0.0197498	0.0344771
Usp12	983	0.0108347	0.0589438	0.0943615	0.0504496
Mpp6	984	0.0053219	0.0352535	-0.118806	0.143303
Zfr2	984	0.00544156	0.0358705	0.0243677	0.02514
Mlx	985	0.00533936	0.0353259	0.020884	0.0886226
Nfkb2	985	0.0109205	0.0593093	0.113459	0.0323498
Rhobtb2	986	0.00538884	0.0356098	0.0179962	0.0341434
Tapbp	986	0.00548079	0.0359976	0.130376	0.158192
St3gal2	987	0.0109627	0.0594668	0.0567434	0.0425512
Gbp7	988	0.00540851	0.0357179	-0.436282	0.112792
AI661453	988	0.0109711	0.0594668	0.0505243	0.040234
Nde1	989	0.00544688	0.0358838	-0.0543183	0.0644405
Nsun5	990	0.00545093	0.0358886	0.0382398	0.0720667
Pcnx3	990	0.0106537	0.058201	0.0567979	0.0560299
Foxn3	991	0.0111316	0.0601715	0.0794358	-0.0258387
Abcb8	992	0.00547155	0.0359902	-0.0289358	0.0520306
Ndor1	992	0.0111394	0.0601715	0.0188038	0.00306027
Gpx1	993	0.00547432	0.0359902	-0.277222	0.15595
Kdelc2	993	0.0111515	0.0601715	0.0558557	-0.00161452
Nhp2	994	0.00547634	0.0359902	-0.528629	0.155884
Hoxa7	995	0.00551563	0.0361826	0.0154898	0.0610505
Wisp2	995	0.011302	0.0607715	0.0369253	-0.044184
Gart	996	0.00559844	0.0366148	-0.00472866	0.0953659
Arrdc3	996	0.0113211	0.0608439	0.0494283	0.0340056
Noa1	997	0.00561825	0.0367222	0.022792	0.0735301
Nab1	997	0.0113539	0.0609296	0.106115	0.0221555
Morc3	998	0.00564466	0.0368726	-0.0468889	0.0900008
Ndufb10	999	0.0056499	0.0368845	-0.0561771	0.14873
Gsdme	999	0.0114652	0.0614963	0.061529	-0.0408064
Smim19	1000	0.00568535	0.0370489	-0.00673192	0.115405
Tsc1	1000	0.011498	0.0616005	0.0562049	0.0297846
Gpn1	1001	0.00570438	0.0371505	0.0411585	0.0865938
Plxna3	1001	0.0115457	0.0617751	0.0309831	0.0199532
Ino80b	1002	0.00572416	0.037257	0.021814	0.068849
Hacd2	1002	0.0116618	0.0623342	0.0902664	0.0346823
Ndufa13	1003	0.00573186	0.0372846	0.0840248	0.140233
Ppp2r3a	1003	0.0116956	0.0624537	0.0828821	0.0228511
Hmox2	1004	0.0057485	0.0373704	0.00529973	0.0895668
Ss18l1	1004	0.0117728	0.0627418	0.0302906	0.0197377
Tmub1	1005	0.00575757	0.0373928	0.0336113	0.0552432
Fut8	1005	0.0118367	0.0629893	0.113413	-0.0265598
Chrnb1	1006	0.0057623	0.0373928	-0.0720967	0.088096
Gm17018	1007	0.00578133	0.0374713	-0.0212278	0.128809
Zkscan3	1007	0.0119152	0.0633759	0.0690688	0.0384882
Lsm3	1008	0.00579805	0.0375572	-0.465817	0.114476
Bfar	1008	0.0119703	0.0636065	0.07494	0.0525762
Ung	1009	0.00581057	0.0375933	-0.125929	0.0390353
Srgap3	1009	0.0120663	0.0639598	0.0452773	0.000942056
Irgq	1010	0.0120939	0.0640434	0.0394627	0.00487758
Trnau1ap	1011	0.00582886	0.0376656	-0.0592697	0.114827
Comt	1011	0.00632238	0.0399715	0.111365	0.125118
Ifi44l	1012	0.00583219	0.0376656	0.0195783	0.0549151
Zdhhc8	1012	0.0121711	0.0643262	0.0622775	0.0226925
Uqcrb	1013	0.00584953	0.0377504	-0.230536	0.14415
Rsph9	1013	0.0122083	0.0644206	0.0180003	0.0161136
Yme1l1	1014	0.0122136	0.0644206	0.0858791	-0.0403071
Irf6	1015	0.0122281	0.0644206	0.0855248	0.013814
Myl12b	1016	0.00596318	0.0383827	-0.00847264	0.147186
Evi5	1016	0.0122656	0.0645658	0.104737	0.0494435
Ints10	1017	0.00596805	0.0383827	0.0182001	0.0531472
Polr3e	1017	0.0061495	0.0392697	0.0561924	0.0643169
Gtpbp10	1018	0.00604608	0.0388615	0.0347377	0.0468782
Gins2	1019	0.00607709	0.0389994	-0.434678	0.0907451
Tmem102	1019	0.0123524	0.0649093	0.0304287	-0.0058284
Fam53b	1020	0.0060831	0.0389994	0.0233812	0.0342017
Sos2	1020	0.0124025	0.0651357	0.0600948	0.0064617
Trub2	1021	0.0061214	0.0391828	0.0255214	0.0495217
Cdk14	1021	0.0124256	0.0652252	0.0776009	0.0660189
Bloc1s2	1022	0.00613703	0.0392459	-0.153084	0.112917
Lrrfip1	1022	0.0124835	0.0653995	0.131423	-0.407964
Snx17	1023	0.00614199	0.0392459	0.00305663	0.115873
Pum3	1023	0.0124976	0.0653995	0.0987123	-0.0149579
Ovol2	1024	0.00616666	0.0393329	-0.00267781	0.0513487
Exosc8	1025	0.00618854	0.0394492	-0.495412	0.111573
Dgkh	1025	0.0125751	0.0657182	0.0713713	-0.0406438
Zbtb45	1026	0.00619373	0.0394591	0.0227281	0.0366504
Bdh2	1027	0.0126501	0.0658862	0.0196947	0.00960646
Nap1l4	1028	0.00623645	0.0397079	-0.0249411	0.118546
Lrrc41	1028	0.0126536	0.0658862	0.0846101	0.0180335
Glrp1	1029	0.00624055	0.0397106	-0.122947	0.0891818
Fzd2	1029	0.012785	0.0664033	0.0297147	0.0276992
3300002I08Rik	1030	0.0128198	0.0665345	0.0218705	0.0204681
Ifit1	1031	0.00625175	0.0397585	0.0206286	0.0985887
Mrpl32	1032	0.00626661	0.0398229	-0.0411283	0.129875
Il1r1	1032	0.0128225	0.0665345	0.069104	0.0256685
Mtmr2	1033	0.00626924	0.0398229	-0.116686	0.116591
Plod2	1033	0.0128772	0.0667861	0.0798616	-0.138379
Lsm8	1034	0.00627856	0.0398451	-0.362557	0.131449
Cul5	1034	0.0128982	0.0668309	0.0969995	0.0581848
Lsm10	1035	0.00628527	0.0398546	0.0147792	0.0779426
Btd	1035	0.0129185	0.066904	0.0509672	0.00138659
Uba2	1036	0.00630639	0.0399449	0.00969385	0.10029
Acer3	1036	0.0130754	0.0675875	0.081023	0.00879095
Ifit3	1037	0.0063069	0.0399449	0.0274398	0.0820449
Mllt3	1037	0.0131091	0.0676971	0.0865499	-0.0515029
D10Jhu81e	1038	0.0063153	0.0399617	-0.00393355	0.0668047
Nacc2	1038	0.0131527	0.0678711	0.037368	0.00947312
Ppie	1039	0.00633883	0.04003	-0.0629495	0.0928323
Acvr2b	1039	0.0131616	0.0678711	0.0425756	0.0329079
Fem1a	1040	0.00636138	0.040149	0.0243036	0.0465588
Rab32	1040	0.0131944	0.067943	0.0767567	0.0071004
Dnajc2	1041	0.00638845	0.0402729	-0.203757	0.149435
Atad2b	1042	0.00640112	0.0403257	0.0738334	0.0952371
Erbb2	1042	0.0133808	0.0687394	0.049378	0.000313068
Crtap	1043	0.0134017	0.068814	0.0774231	-0.02056
Nudt14	1044	0.00646874	0.0405429	0.0237697	0.0930426
Tcf7l1	1044	0.0134516	0.0689733	0.0416543	0.024869
H2afz	1045	0.0064981	0.0407034	-1.87579	0.168268
Ccnj	1045	0.0134654	0.0689733	0.0305764	0.0102399
Mrpl4	1046	0.00652013	0.0408145	-0.127093	0.103157
Yipf6	1046	0.0135134	0.0691581	0.0696304	0.0438529
Habp4	1047	0.00652338	0.0408145	-0.00785816	0.0472429
Gfod2	1047	0.0135861	0.0694315	0.0745772	0.0607313
Mrpl20	1048	0.00654266	0.0408879	-0.364377	0.142877
Trim44	1048	0.0136146	0.0695117	0.0701914	0.042168
Tyms	1049	0.00655131	0.0409183	-0.663324	0.0739241
Kdm5a	1049	0.013664	0.0697309	0.0979374	-0.00804
Gm32856	1050	0.0137705	0.070065	0.0237751	0.0100458
Cyb5d2	1051	0.00658281	0.0410516	-0.006497	0.0255076
Plekhm1	1051	0.0137802	0.070065	0.031621	-0.000485576
Snapc1	1052	0.00658404	0.0410516	0.00428332	0.0884796
Eif3e	1052	0.0137877	0.070065	0.122646	0.0252565
Kin	1053	0.00660881	0.0411824	0.0562712	0.103815
Unc119b	1053	0.00690748	0.0426899	0.072825	0.0813511
Casp4	1054	0.0138678	0.0703399	0.0729839	0.0696057
Commd7	1055	0.00672187	0.0418628	-0.0226958	0.105811
Cbl	1055	0.0139063	0.0705019	0.0709185	0.0487593
Mrpl30	1056	0.00677514	0.0421461	-0.376183	0.146636
Tmem60	1056	0.0140742	0.0712196	0.0909378	0.0765209
Ccdc122	1057	0.0067931	0.0421977	-0.0387113	0.0416075
Tcn2	1057	0.0140987	0.0713104	0.0367873	-0.0165794
Frk	1058	0.00679903	0.0421977	0.0265129	0.068993
6030458C11Rik	1058	0.00772	0.0462431	0.0714724	0.0767149
Wbp1l	1059	0.00680942	0.0422137	0.0456709	0.0706633
Ctsa	1059	0.0142551	0.0719334	0.0738289	-0.0559261
Nudt21	1060	0.00683371	0.0423158	-0.345082	0.147633
St6galnac2	1060	0.0143745	0.0724348	0.0278502	0.0226411
Caprin1	1061	0.00687487	0.0425463	0.0413582	0.139821
Cir1	1061	0.0145451	0.0729883	0.0793574	0.0741402
Ric8a	1062	0.00688249	0.0425692	0.0420622	0.0728644
Lsr	1062	0.0146164	0.0732304	0.115262	0.0435437
Fundc1	1063	0.0069099	0.0426899	0.0718379	0.0894132
Pou6f1	1063	0.0146267	0.0732304	0.0216875	-0.00303924
Capn15	1064	0.00693433	0.0428164	0.0246911	0.0728352
Zfp579	1064	0.0146271	0.0732304	0.0438751	0.01501
Erh	1065	0.00694242	0.042828	-0.408525	0.141518
Epgn	1065	0.0146707	0.0733328	0.0264852	-0.0202999
Cenpa	1066	0.00694412	0.042828	-0.893754	0.0772064
Mapkapk2	1066	0.0146718	0.0733328	0.0980336	-0.0480346
Eftud2	1067	0.00698646	0.0430237	-0.0990438	0.0856233
Senp6	1067	0.0147385	0.0735077	0.11989	-0.0716355
Olfr920	1068	0.0147399	0.0735077	0.0496629	0.000287285
Mterf4	1069	0.00703663	0.0432388	0.021508	0.0610558
Ubxn4	1069	0.0147548	0.0735077	0.111825	-0.229118
Thumpd1	1070	0.00703869	0.0432388	0.0372406	0.0929915
Phf1	1070	0.0147857	0.0736156	0.0509815	-0.0136055
Ofd1	1071	0.00705579	0.0433193	-0.0164696	0.0452972
3830406C13Rik	1072	0.00706398	0.043345	0.0160962	0.0716873
Zfp369	1072	0.0132056	0.067967	0.0343986	0.0341587
Hmgb2	1073	0.00709153	0.0434479	-1.63223	0.133542
Fam171a2	1073	0.0141201	0.0713851	0.0304259	0.0284562
Hdgfl2	1074	0.00712291	0.0436077	-0.0642794	0.0847639
Ptges2	1074	0.0097903	0.0546238	0.0519573	0.0537255
Edf1	1075	0.00715969	0.0438081	-0.151513	0.140529
Dync1li1	1075	0.0151571	0.0752226	0.089225	0.0113494
Crb3	1076	0.00719433	0.043961	0.0258299	0.0854709
Trp53i11	1077	0.00719687	0.043961	-0.0168302	0.0509121
Arap2	1077	0.0152172	0.0753827	0.0955322	0.0471649
Sec13	1078	0.00721228	0.0440303	-0.0153305	0.122334
Plcd1	1078	0.0152833	0.0755856	0.0258165	-0.00396518
Eif1ax	1079	0.00722971	0.0441035	-0.12841	0.146171
Tet2	1079	0.0152988	0.0756137	0.0465734	-0.000130128
Stat2	1080	0.00725168	0.044196	-0.0539724	0.0899009
Rabgap1	1080	0.0103729	0.0569491	0.077489	0.0815286
Bet1	1081	0.00726863	0.0442744	-0.0439223	0.0733851
Mras	1081	0.0153934	0.076012	0.0632962	0.0336485
Yae1d1	1082	0.00730785	0.0444883	0.0371329	0.102403
Ube2w	1082	0.0154411	0.0761454	0.0795407	0.0553604
Misp	1083	0.00731727	0.0445206	-0.0430946	0.0786439
Arhgef5	1083	0.0154649	0.0762259	0.100113	0.00730102
Sf3b5	1084	0.00735694	0.0446866	-0.424566	0.131214
Calr	1084	0.0155763	0.0766701	0.132024	0.0934093
Alkbh6	1085	0.00736106	0.0446866	0.039011	0.0672771
Mob3b	1085	0.0156362	0.0768952	0.0613649	-0.00102724
Tgfbr2	1086	0.0159368	0.0780895	0.0851247	0.0471201
Spint1	1087	0.0160063	0.078257	0.0931272	-0.0118377
Pbrm1	1088	0.00744338	0.0451104	-0.0312438	0.141609
Aplp2	1088	0.0160169	0.0782693	0.121114	-0.0465034
Tk2	1089	0.00801091	0.0474604	0.039767	0.0430922
Hpf1	1091	0.00746213	0.0451734	-0.442085	0.123994
Ppp1r12a	1091	0.0162195	0.0791169	0.11192	-0.0219835
Mrpl27	1092	0.0074667	0.0451758	-0.239205	0.124845
Eps15	1092	0.0162543	0.0791325	0.0775852	-0.0248486
Fastkd3	1093	0.00749507	0.0452716	0.0344957	0.0532545
Nr2c1	1093	0.0162848	0.0791854	0.0433656	0.0175334
Gm45716	1094	0.00750785	0.0453235	-0.0508732	0.0709606
Dag1	1094	0.0163066	0.0792201	0.0953942	0.0294015
Srgap2	1095	0.00752747	0.0454166	-0.0225445	0.0689044
Pus1	1095	0.0163151	0.0792261	0.0877815	0.0646939
Dtl	1096	0.0075414	0.0454659	-0.222858	0.0435285
Borcs8	1096	0.0163999	0.0795663	0.0913325	0.0772992
Pik3ip1	1097	0.00754404	0.0454659	0.0273724	0.0681731
Glod4	1097	0.0122288	0.0644206	0.0841228	0.0871039
Bcl7a	1098	0.00758608	0.0456683	-0.00386239	0.0314085
Acadl	1099	0.00761485	0.0458161	0.0534233	0.157321
Clint1	1099	0.0165796	0.0801151	0.0973294	0.0735908
Plscr3	1100	0.00766059	0.0460401	-0.0151335	0.104822
Rbm12	1100	0.0166012	0.0801271	0.056017	0.048182
Snrnp40	1101	0.00767211	0.0460838	-0.0710281	0.104139
Ankrd17	1101	0.0166722	0.0803533	0.109873	-0.0890999
Txndc17	1102	0.00768029	0.0461073	-0.0259395	0.141149
Higd2a	1102	0.0166735	0.0803533	0.116036	0.0778811
Smyd2	1103	0.00769314	0.0461474	-0.0411358	0.117477
Nudt8	1103	0.0166961	0.0804267	0.0382462	0.013879
Faim	1104	0.00769549	0.0461474	-0.0508926	0.103164
Rbms2	1105	0.00773596	0.0462875	0.0303553	0.0924191
2700081O15Rik	1105	0.0169572	0.0814665	0.0659198	-0.0327314
Lysmd4	1106	0.00774102	0.0462893	0.0146772	0.0217229
Bcl6	1106	0.0169831	0.0814665	0.0264038	0.00915209
Proser2	1107	0.0171025	0.081874	0.0655975	0.0206759
Icam1	1108	0.00781404	0.0466235	-0.0748959	0.0936843
Fcgbp	1108	0.0171963	0.0822502	0.0403388	-0.00716252
Sdsl	1109	0.00781797	0.0466235	0.0109261	0.0223295
Grina	1109	0.0172349	0.0823624	0.0922666	-0.0590867
Drg2	1110	0.00788467	0.0469437	-0.0586325	0.0800579
Pisd	1110	0.0172662	0.0824388	0.0735723	0.0477828
Myo19	1111	0.00788915	0.0469446	0.0227275	0.045923
Rnaseh1	1112	0.00792376	0.0471031	0.00633185	0.0614199
2700046G09Rik	1112	0.013528	0.0691997	0.0192359	0.0190048
Carm1	1113	0.00793777	0.0471424	-0.00425279	0.0598148
Hmga2	1113	0.0172995	0.0825617	0.135763	0.0150878
Ube2n	1114	0.00793981	0.0471424	-0.155844	0.147485
Rbm4b	1114	0.0173174	0.0826108	0.0948196	0.035106
Stau2	1115	0.0173535	0.0826736	0.0702098	0.0579176
Pds5b	1116	0.00796579	0.0472636	0.0442963	0.0930451
Hibadh	1116	0.0174412	0.0829819	0.0889181	0.0486717
Tmem79	1117	0.00796944	0.0472636	-0.0405528	0.0548713
[truncated: 8,825 more rows]
