# Supplementary material for: Single-cell RNA-sequencing reveals distinct patterns of cell state heterogeneity in mouse models of breast cancer
Source: eLife. 2020 Aug 25;9:e58810. doi: 10.7554/eLife.58810 (PMC7447441; doi:10.7554/eLife.58810)
Supplement: Figure 4—source data 6. [file elife-58810-fig4-data6.xlsx]

## Sheet: 1-LP-Inv
	Top	p.value	FDR	logFC.2	logFC.3	logFC.4
Malat1	1	1.24089e-122	4.78734e-119	0.63732	1.04129	1.43555
Krt18	2	7.60053e-99	1.46614e-95	0.255672	0.791501	0.963066
Aldoa	1	1.73518e-95	2.23145e-92	0.841512	0.637874	1.68108
Apoc1	1	9.87586e-78	9.52526e-75	0.517729	0.350918	1.30487
Sfn	3	1.70899e-73	1.31866e-70	-0.161361	0.898348	0.511642
Cldn10	2	1.1063e-72	7.11348e-70	0.869183	0.448703	1.36352
Gdpd3	3	1.90104e-72	1.04774e-69	0.2186	0.215951	0.776434
Fos	3	1.29516e-67	6.24592e-65	1.07597	-0.0697308	0.610537
Sbno2	4	5.31298e-61	2.2775e-58	-0.00144846	0.764358	0.586986
Sdc4	5	7.44326e-61	2.87161e-58	0.0940286	0.65368	0.356558
Hspb1	6	8.75106e-59	3.06924e-56	0.453672	0.917031	0.859892
Clic6	5	2.38874e-58	7.67979e-56	0.507853	0.332718	0.947485
Cebpd	7	1.18392e-57	3.51351e-55	0.0152364	0.94228	1.03173
Nupr1	6	1.50518e-57	4.14784e-55	0.291502	0.296325	1.20547
Nfkbia	8	1.9816e-57	5.09667e-55	-0.166573	0.870118	0.731172
Cldn4	9	1.9522e-56	4.70725e-54	-0.625972	0.751289	0.73686
Neat1	10	4.10472e-56	9.31529e-54	0.345234	0.720186	0.633796
Use1	7	5.69894e-55	1.22147e-52	0.279468	0.331752	0.8274
Ypel3	8	2.48716e-52	5.05025e-50	0.373034	0.234719	0.768837
Smpdl3a	9	1.38828e-51	2.67799e-49	0.0438511	-0.0130389	0.796584
Ctsl	10	6.39437e-50	1.17474e-47	0.397208	0.614888	0.946259
Igfbp5	11	1.94203e-49	3.40561e-47	0.297016	0.311409	1.45175
Enho	13	2.8868e-47	4.8423e-45	0.268717	-0.151014	0.725712
Lyzl4	14	5.06512e-47	8.14219e-45	0.139594	0.0450886	0.478772
Txnip	13	2.20531e-46	3.40324e-44	0.335814	0.629437	0.799838
Ndrg1	14	2.74475e-45	4.07279e-43	0.232982	0.427261	0.523328
Atf3	15	1.20308e-44	1.71906e-42	0.189425	0.725347	0.568656
Basp1	16	2.85708e-44	3.93665e-42	-0.124335	0.37286	0.272291
Jun	17	3.43934e-44	4.57551e-42	0.222421	0.740591	0.744899
Gadd45b	18	1.22491e-43	1.5267e-41	0.0719839	0.556379	0.582708
Pde4b	19	1.22675e-43	1.5267e-41	-0.453363	0.593587	0.588229
Mt2	20	2.19628e-43	2.64789e-41	-0.524046	0.833429	0.611148
Runx1	16	3.65105e-43	4.26841e-41	0.054538	0.307323	0.541028
Emp1	21	4.92182e-43	5.58481e-41	0.0787115	0.37844	0.155264
Tgif1	22	7.41306e-42	8.17131e-40	-0.354739	0.487396	0.321605
Mt1	23	1.98992e-41	2.13253e-39	-0.323733	0.857709	0.650992
Jund	24	2.19105e-41	2.28461e-39	0.11692	0.575365	0.610359
Cxadr	25	7.4803e-41	7.59447e-39	-0.235039	0.395256	0.244228
Osmr	26	4.2302e-40	4.18464e-38	-0.0163362	0.358855	0.287857
Rsrp1	17	8.83775e-40	8.52401e-38	0.198585	0.253949	0.702652
Ahnak	27	1.8676e-39	1.75737e-37	0.131488	0.290828	0.248464
Ier5	28	1.92113e-39	1.76469e-37	0.0265786	0.516257	0.549195
Car6	18	5.28672e-39	4.74329e-37	0.368092	-0.0544647	1.35109
Pik3r1	19	6.6668e-39	5.84557e-37	-0.0660781	0.183123	0.910807
Btg1	29	2.32183e-38	1.99058e-36	-0.254382	0.511775	0.336975
Selenop	20	1.70693e-37	1.4316e-35	0.126939	0.0702535	0.656336
Pdzk1ip1	21	1.81409e-37	1.4891e-35	-0.114255	-0.0702155	0.545097
Eif4a2	22	3.49516e-37	2.80923e-35	0.271318	0.244867	0.622089
Pnrc1	24	2.00955e-36	1.58221e-34	-0.0759737	0.493077	0.818444
Klf6	30	5.44364e-36	4.20031e-34	0.00376999	0.553013	0.493571
Cd63	25	7.57652e-36	5.73142e-34	0.147808	0.417544	0.787427
Zfp467	26	1.41174e-35	1.04741e-33	0.182619	0.0877172	0.357001
Plin2	27	1.99428e-35	1.45169e-33	0.0910913	-0.233473	0.838838
Apoe	7	2.89136e-35	2.06571e-33	0.561698	0.517124	0.580923
Rab17	28	4.01546e-35	2.81666e-33	0.140957	0.024787	0.382441
Ly6d	17	6.85256e-35	4.72092e-33	0.368508	0.344357	0.581581
Tnfrsf12a	31	1.44932e-33	9.80963e-32	-0.753312	0.538314	-0.27605
Acpp	31	4.58183e-33	3.0477e-31	0.0615007	0.107572	0.230454
Krt8	33	5.45511e-33	3.56709e-31	-0.1803	0.495031	0.361475
Dkkl1	32	1.70744e-32	1.09789e-30	0.22791	0.180236	0.653279
Stat3	34	2.62194e-32	1.65827e-30	-0.0483836	0.39935	0.3865
Maff	35	6.07805e-32	3.78212e-30	0.00325249	0.259541	0.148825
Coq10b	36	7.69541e-32	4.71252e-30	-0.181293	0.332842	0.270249
Pim1	37	9.83469e-32	5.92847e-30	0.112585	0.312825	0.248055
Dhrs3	18	1.00812e-31	5.98359e-30	0.245011	0.0994314	0.406449
Ccnl1	38	2.22638e-31	1.30142e-29	0.0391434	0.360178	0.268109
Serpina3n	39	2.69241e-31	1.55035e-29	-0.191766	0.451316	0.145779
Hspa1a	40	2.82152e-31	1.6008e-29	0.368757	0.709447	0.766449
Ptpn2	41	4.30706e-31	2.40821e-29	-0.342288	0.428188	0.41604
Ogt	34	4.54259e-31	2.50362e-29	0.175075	0.228572	0.55155
Cd14	42	4.61575e-31	2.50811e-29	-0.502245	0.545951	0.640696
Efhd2	44	2.12611e-30	1.13924e-28	-0.260149	0.403163	0.350651
Map2k3	46	2.82439e-30	1.49267e-28	-0.326885	0.376069	0.0810596
Lamp2	36	2.95453e-30	1.54035e-28	-0.0485605	0.144411	0.51684
Mdfi	47	3.31265e-30	1.70403e-28	-0.147823	0.273928	0.086904
Abhd14b	37	3.50823e-30	1.78089e-28	-0.00574537	-0.0983021	0.412157
Ppp1r15a	43	2.69893e-29	1.35227e-27	0.15938	0.286909	0.341108
Junb	39	3.12152e-29	1.54395e-27	0.304718	0.482674	0.945432
Fosb	24	6.8082e-29	3.32481e-27	0.204142	0.26986	0.182697
Phlda1	50	5.84347e-28	2.81801e-26	-0.157926	0.52399	0.773334
Srsf5	8	1.6195e-27	7.71361e-26	0.391349	0.285671	0.361024
Id2	9	3.75523e-27	1.76679e-25	0.512879	-0.416	0.390449
Dtx3	36	1.52819e-26	7.10331e-25	0.214511	0.178443	0.418857
2610528A11Rik	20	2.75293e-26	1.26438e-24	0.22997	0.220384	0.326585
Arrdc4	45	6.4273e-26	2.91724e-24	-0.148217	0.34281	0.572523
Rassf1	51	1.41803e-25	6.36136e-24	-0.101126	0.328367	0.307472
Rap1gap	47	1.48239e-25	6.57364e-24	0.0503258	-0.150312	0.347099
Sod2	48	1.89295e-25	8.29886e-24	-0.194889	0.156934	0.590079
Chil1	52	3.24231e-25	1.40549e-23	-0.12476	0.542072	0.541033
Gch1	53	4.74349e-25	2.03338e-23	-0.0719582	0.197804	0.0610424
Klf5	54	6.36112e-25	2.69683e-23	-0.181725	0.291755	0.202482
Chad	49	1.13814e-24	4.77277e-23	0.156721	-0.0288723	0.420828
Litaf	55	1.88795e-24	7.83193e-23	-0.17555	0.377562	0.484122
Plet1	50	4.08183e-24	1.67529e-22	-0.284418	0.235193	0.667431
Entpd2	51	4.27201e-24	1.73489e-22	0.0488781	0.0178077	0.315799
Errfi1	52	7.13921e-24	2.86907e-22	-0.301252	0.374873	0.661359
Macrod1	53	7.87561e-24	3.13238e-22	0.0884282	0.102302	0.3149
Ubc	56	8.87948e-24	3.49562e-22	-0.161204	0.464702	0.572108
Zfp36	11	9.60766e-24	3.74408e-22	0.519162	0.0209221	0.624861
Pnpla2	54	1.00733e-23	3.88627e-22	0.185893	0.119187	0.409125
Klf9	55	3.42946e-23	1.30999e-21	0.117299	0.121981	0.395468
Arhgef6	48	3.76613e-23	1.42448e-21	0.201206	0.18546	0.354011
Btg2	12	5.1471e-23	1.92791e-21	0.408091	0.176966	0.458505
Stk11	57	6.6427e-23	2.46418e-21	0.0492254	-0.202644	0.416841
Itpkc	57	1.5149e-22	5.56617e-21	-0.0399138	0.169021	0.0993046
Appl2	56	3.42666e-22	1.24717e-20	0.159742	0.0912332	0.323612
Cox8b	50	3.66564e-22	1.32169e-20	0.122744	0.115849	0.19969
Zc3h12a	59	4.39392e-22	1.56961e-20	-0.0705173	0.176441	0.120477
Rnase1	19	5.23529e-22	1.85301e-20	0.194935	0.213603	0.228399
Slc16a2	60	5.64189e-22	1.97877e-20	0.0952772	0.170613	0.280517
Hibadh	61	6.36994e-22	2.21399e-20	0.0825663	-0.0044524	0.362072
C530043A13Rik	62	7.02337e-22	2.4193e-20	-0.121628	-0.133617	0.673157
Sbsn	64	9.54193e-22	3.25777e-20	0.133954	0.205188	0.283603
Dbp	14	1.14431e-21	3.87257e-20	0.258593	0.109251	0.378835
Gas6	61	1.7465e-21	5.85913e-20	0.11397	0.143785	0.199529
Pink1	68	2.19956e-21	7.31543e-20	-0.16226	-0.0794606	0.427574
Ralgds	61	7.73495e-21	2.55055e-19	-0.116506	0.251163	0.140147
Ncald	16	1.59996e-20	5.23107e-19	0.343068	-0.182653	0.494352
Lypd3	64	4.33266e-20	1.40466e-18	-0.0485481	0.173741	0.0283262
Hmox1	65	5.6918e-20	1.82991e-18	0.210417	0.328666	0.400445
Lgals3	66	6.18877e-20	1.97324e-18	0.146849	0.342601	0.409535
Txnrd1	67	1.7432e-19	5.51252e-18	-0.0624404	0.259657	0.0423336
Rabep2	15	1.97014e-19	6.1795e-18	0.228712	0.0805677	0.267532
Nav2	69	2.34638e-19	7.30028e-18	0.00807571	0.133507	0.0818827
Gprc5b	73	3.52569e-19	1.08817e-17	0.0952853	0.0124482	0.211045
Ldlrad4	74	4.18483e-19	1.28136e-17	0.102532	0.0779943	0.231805
Nedd9	71	5.19847e-19	1.57919e-17	0.00721114	0.254324	0.163591
Nfe2l1	73	1.06451e-18	3.18363e-17	0.0421595	0.254237	0.188463
Efna1	72	1.05847e-18	3.18363e-17	-0.0413814	0.223046	0.252388
Camk2n1	71	1.35055e-18	4.00802e-17	0.132353	0.153421	0.229274
Klf13	74	1.36338e-18	4.01522e-17	0.0477788	0.210725	0.224366
Traf1	34	1.91082e-18	5.58479e-17	0.125101	0.0538948	0.161742
Anpep	81	3.02571e-18	8.77685e-17	-0.142602	-0.0722347	0.323444
Shisa5	82	3.19313e-18	9.19336e-17	-0.0424511	-0.0293038	0.368442
B4galnt1	83	3.76398e-18	1.07566e-16	0.00106229	-0.0386419	0.346724
Csrp1	84	4.307e-18	1.22179e-16	0.181296	0.28666	0.408357
Hcfc1r1	85	4.43618e-18	1.24925e-16	-0.0720201	-0.13797	0.462905
Relb	75	6.41027e-18	1.79209e-16	-0.0586682	0.143691	0.132897
Adig	87	7.14098e-18	1.98201e-16	-0.183212	-0.250113	0.490717
Trp53inp1	76	1.02363e-17	2.82084e-16	0.0539062	0.170378	0.165284
Hspa1b	77	1.13597e-17	3.10821e-16	0.116112	0.203836	0.204765
Ndel1	78	1.3259e-17	3.60234e-16	-0.265997	0.265739	0.150135
D730003I15Rik	88	1.85637e-17	5.00831e-16	0.0654677	0.0323714	0.21038
Sidt1	65	2.97371e-17	7.96708e-16	0.131541	0.0574839	0.234432
Brd2	82	3.51406e-17	9.34981e-16	0.0655791	0.239471	0.072656
Cdhr1	90	4.43295e-17	1.17139e-15	0.0077854	0.0328197	0.0901596
Xbp1	91	5.68089e-17	1.49094e-15	0.03572	-0.423482	0.532798
H2-D1	92	6.26962e-17	1.63434e-15	-0.218067	-0.190563	0.672244
Hdac11	62	6.56777e-17	1.70057e-15	0.140813	0.0487267	0.247874
Trim47	83	8.1909e-17	2.1067e-15	-0.0926978	0.155193	0.036005
Ptp4a1	85	9.05859e-17	2.31444e-15	-0.208884	0.272569	0.15497
Fxyd6	86	1.17845e-16	2.99109e-15	0.132481	0.272416	-0.0263193
Jmjd1c	87	1.19831e-16	3.02163e-15	-0.00642089	0.257253	0.184235
B2m	96	1.27998e-16	3.20659e-15	-0.156019	-0.186729	0.793274
Slc12a2	97	1.71568e-16	4.27039e-15	0.0877793	-0.141051	0.526403
Ank	98	1.80225e-16	4.45709e-15	0.0154777	-0.00367156	0.258518
Espn	22	2.05197e-16	5.04237e-15	0.145536	0.139376	-0.0346291
Cyp2d22	23	2.2058e-16	5.38606e-15	0.138384	0.129614	0.145125
Atp6v1b1	32	2.24916e-16	5.45741e-15	0.210878	0.0987232	0.299081
Ddah2	101	2.59765e-16	6.26358e-15	0.0612	0.102298	0.395528
St3gal1	102	3.05233e-16	7.31423e-15	0.0439679	0.088339	0.170308
Ets2	89	3.24309e-16	7.72336e-15	-0.117738	0.195708	0.204859
H2-T23	104	5.1252e-16	1.21307e-14	0.0812141	-0.00765424	0.390776
Klf4	90	5.90005e-16	1.38795e-14	0.0921883	0.134684	0.142385
Thbs1	91	7.97401e-16	1.86447e-14	-0.276917	0.297345	0.319834
Mindy2	106	8.25289e-16	1.91805e-14	0.000201969	0.0131309	0.267021
Rora	107	9.12611e-16	2.1083e-14	0.0480208	0.162177	0.277974
Hist1h1c	25	9.33516e-16	2.14375e-14	0.394749	0.0948996	0.434135
Tspan8	108	9.74133e-16	2.22379e-14	-0.349881	-0.334428	0.590159
Lmna	92	9.90366e-16	2.24755e-14	-0.349704	0.343259	-0.247492
Tmem51	93	1.12563e-15	2.53958e-14	-0.171997	0.168644	0.119294
Msn	94	1.21316e-15	2.72114e-14	-0.0795611	0.169389	0.042703
Gm26532	95	1.35181e-15	3.01462e-14	0.0447466	0.112425	0.0543176
Hist1h4i	26	1.41619e-15	3.14003e-14	0.250097	-0.0137961	0.319544
Cdkn1a	96	1.47566e-15	3.2532e-14	0.0973963	0.241729	-0.237909
Erf	98	1.58712e-15	3.47904e-14	0.0050791	0.136481	0.0493347
Tubb6	99	1.94237e-15	4.23371e-14	-0.175107	0.132292	-0.0641097
G0s2	28	2.59258e-15	5.61919e-14	0.227524	-0.537427	0.0060489
Icam1	101	3.02571e-15	6.52134e-14	-0.0828255	0.162223	0.0837204
Qsox1	110	3.84636e-15	8.24402e-14	-0.230122	-0.124139	0.472795
Nedd4l	102	4.04935e-15	8.63115e-14	0.00543831	0.181752	0.191073
Cebpb	104	4.20202e-15	8.90736e-14	0.157456	0.303107	0.477196
Bcl2l11	105	4.34504e-15	9.1602e-14	-0.017942	0.156213	0.115693
Irx1	112	4.67393e-15	9.80001e-14	0.0165005	0.0865768	0.378113
Nfkbiz	108	5.63733e-15	1.17561e-13	-0.00557829	0.224901	0.186525
Igbp1	113	6.83813e-15	1.41836e-13	0.0103067	0.0171753	0.307675
Capn9	115	7.05007e-15	1.4545e-13	0.0304736	-0.0159609	0.180678
Gadd45a	116	7.33723e-15	1.50569e-13	-0.148898	0.0918673	0.299216
Hcar2	109	8.27637e-15	1.68943e-13	-0.0978765	0.121054	0.115169
Slc2a1	117	8.33295e-15	1.69203e-13	-0.0066605	0.146275	0.297186
Ccpg1	118	9.04201e-15	1.82639e-13	0.0327266	0.0609736	0.197668
Mfsd4a	119	9.60315e-15	1.92963e-13	0.0354971	-0.14096	0.203112
Csprs	99	1.18965e-14	2.37807e-13	0.0660907	0.0369419	0.11357
Gm16025	54	1.25615e-14	2.49806e-13	0.0599725	0.0399058	0.0750315
Trim7	122	1.3835e-14	2.7372e-13	-0.043986	0.0171106	0.251698
Cdc42ep4	111	1.41472e-14	2.78469e-13	-0.125678	0.191782	0.182335
Cttnbp2nl	112	1.51383e-14	2.96465e-13	-0.0248552	0.135405	0.033227
Baz1a	113	1.8013e-14	3.5098e-13	-0.0544138	0.1461	-0.047332
Cd24a	114	1.95216e-14	3.78464e-13	-0.372495	0.340781	0.291576
Bik	107	2.2317e-14	4.30494e-13	0.107236	0.0903683	0.216489
Srebf1	128	2.28636e-14	4.38845e-13	0.0493826	-0.170942	0.538589
Birc3	116	3.34347e-14	6.38569e-13	-0.0868669	0.167565	0.113661
Senp2	117	3.40107e-14	6.46372e-13	0.0281183	0.153006	0.0907581
Pde4d	130	3.68223e-14	6.96375e-13	0.0866755	0.088085	0.290796
Socs3	30	5.8327e-14	1.09769e-12	0.180984	0.0483913	0.0536259
Myo6	134	6.96042e-14	1.29726e-12	0.0680684	0.153064	0.232401
Hsp90aa1	118	6.94321e-14	1.29726e-12	-0.0880334	0.358723	-0.483117
H2-Q4	119	7.04103e-14	1.30598e-12	-0.0815559	0.276986	0.163098
Bcl3	120	7.76286e-14	1.43297e-12	-0.23723	0.198609	0.139606
Il6ra	135	9.43281e-14	1.73294e-12	0.0237098	0.0265875	0.1484
Bhlhe40	33	1.12832e-13	2.06305e-12	0.296419	-0.0412282	0.308396
Nqo1	124	1.19037e-13	2.16626e-12	0.0448028	0.105629	0.113722
Elovl1	136	1.38026e-13	2.50002e-12	-0.144588	-0.084615	0.282494
Myd88	137	1.47909e-13	2.66651e-12	-0.0335321	0.143466	0.190949
Agt	139	1.895e-13	3.40042e-12	-0.0376973	-0.115229	0.227859
Ptpn1	122	1.92774e-13	3.44316e-12	-0.174322	0.222933	0.149702
Egr1	35	1.94721e-13	3.4619e-12	0.192181	0.00434873	0.0770999
Arid5b	123	1.96446e-13	3.47655e-12	-0.154396	0.194577	0.201024
Nr1d1	140	2.08855e-13	3.67928e-12	0.0608589	0.105559	0.22635
Ddit3	70	2.41816e-13	4.24058e-12	0.136294	0.169563	0.183803
Tm4sf1	126	2.55313e-13	4.457e-12	-0.572912	0.340298	0.404064
Rp9	142	3.05695e-13	5.31248e-12	0.108786	0.0599444	0.316236
Gns	143	3.14724e-13	5.44487e-12	0.0429685	0.0778776	0.198636
Scd1	144	3.44606e-13	5.93523e-12	-0.491263	-0.344732	0.523053
Atf4	127	3.66585e-13	6.2857e-12	-0.11537	0.291079	0.289241
Inhbb	73	3.69446e-13	6.30674e-12	0.150134	-0.0354089	0.238007
Tpi1	39	6.02176e-13	1.02343e-11	0.277195	0.130885	-0.0748107
Pxdc1	129	6.52814e-13	1.10463e-11	-0.927654	0.284999	-0.107648
Samhd1	130	6.65454e-13	1.1211e-11	0.100919	0.159651	0.177967
Epb41l4aos	147	8.10911e-13	1.36022e-11	0.095594	0.153055	0.253542
Rela	131	8.30127e-13	1.38642e-11	-0.121177	0.165579	0.12852
Rcan1	132	8.59624e-13	1.4295e-11	-0.342172	0.246768	0.240735
Tulp1	148	8.80962e-13	1.45869e-11	0.0361993	-0.0112662	0.155001
Sun2	94	1.02814e-12	1.69512e-11	0.0750476	0.0991463	0.00177084
P2rx4	149	1.14263e-12	1.87586e-11	-0.0341857	-0.0933838	0.320945
Mbp	150	1.22628e-12	2.00465e-11	-0.116152	0.121605	0.184562
Nfkb1	134	1.54015e-12	2.50713e-11	-0.129455	0.173215	0.0615886
Lrrc51	152	1.57271e-12	2.54938e-11	0.0229425	0.00652583	0.107721
Mvp	153	1.57956e-12	2.54977e-11	-0.0179507	0.104896	0.194
Bnip3	42	2.08055e-12	3.34449e-11	0.185923	0.160815	0.153595
Phf1	145	2.31245e-12	3.70184e-11	0.0721071	0.0906502	0.142215
Gabarapl1	156	2.43788e-12	3.8865e-11	0.0608259	0.14059	0.278143
Fam20a	157	2.93052e-12	4.65265e-11	-0.0557357	-0.323535	0.321971
Cracr2b	63	3.1458e-12	4.97397e-11	0.221697	-0.0473443	0.348339
Igf1r	156	3.27098e-12	5.1508e-11	0.0491655	0.0550526	0.0950731
Dnajb1	135	3.68684e-12	5.78204e-11	-0.0478605	0.227403	0.168126
Timp2	161	3.85875e-12	6.02714e-11	-0.00694498	0.0571502	0.168801
Adamtsl2	157	4.03844e-12	6.28237e-11	0.0442028	0.0543385	0.0642436
S100a10	136	4.12639e-12	6.39341e-11	-0.464074	0.29115	-0.276597
Slc41a1	163	4.73459e-12	7.30642e-11	0.0133427	-0.065038	0.209089
Smoc2	164	4.98213e-12	7.6578e-11	0.0281382	-0.0635631	0.215016
Zfp36l1	44	5.27052e-12	8.06891e-11	0.278489	0.180411	0.299373
Sqstm1	138	7.25026e-12	1.10559e-10	-0.0323	0.236291	0.231679
Mlph	167	7.62817e-12	1.15633e-10	0.0709411	-0.116131	0.218772
Magix	119	7.64291e-12	1.15633e-10	0.0487273	0.0214498	0.0763024
Rnf19b	139	9.05177e-12	1.36413e-10	-0.044385	0.115133	0.101058
Smim3	140	9.18672e-12	1.37908e-10	-0.0283574	0.114282	0.116231
Zfand5	141	9.23852e-12	1.38148e-10	-0.478095	0.258445	0.250123
Mif	46	9.42984e-12	1.39924e-10	0.302991	0.220223	-0.0447291
Angptl4	170	9.41739e-12	1.39924e-10	0.00583998	0.0751358	0.0955965
Irf2bpl	171	1.08965e-11	1.61068e-10	-0.022015	0.161656	0.285821
Rhoc	144	1.50546e-11	2.21682e-10	-0.181112	0.252124	0.290543
Ceacam1	145	1.92502e-11	2.82385e-10	-0.00801146	0.229571	0.182073
Pfkp	126	1.99419e-11	2.91424e-10	0.132715	0.201684	0.0301308
AC168977.2	172	2.04221e-11	2.97315e-10	0.0193557	0.0119157	0.0887381
Zfp704	147	2.42637e-11	3.51914e-10	0.0491824	0.0968773	0.0931814
Glul	105	3.10316e-11	4.4839e-10	0.0777134	0.0994688	0.0762963
Fam234a	60	3.20996e-11	4.6209e-10	0.167261	0.120744	0.257289
Pbxip1	175	3.56891e-11	5.11853e-10	0.0432748	0.0622154	0.306746
Mafk	156	4.72773e-11	6.7554e-10	0.00501682	0.102979	0.127089
Vsir	110	5.20402e-11	7.40853e-10	0.0553911	0.035333	0.0801637
Elf3	180	5.79031e-11	8.21288e-10	0.0154991	0.0842258	0.115041
Arf6	149	5.97837e-11	8.44856e-10	-0.0957579	0.192785	0.0746177
Dstn	150	6.00951e-11	8.46156e-10	0.0185382	0.234827	0.198599
Sphk1	151	6.60721e-11	9.26932e-10	-0.284737	0.143428	-0.0076618
Sod3	181	6.75412e-11	9.44109e-10	-0.0918347	-0.125747	0.252757
Xdh	182	6.94007e-11	9.66599e-10	-0.230942	-0.0496161	0.286142
Bricd5	183	7.04689e-11	9.77947e-10	-0.0031063	-0.24643	0.440387
Clic4	152	7.97501e-11	1.10278e-09	-0.00773358	0.128826	0.0819052
Abhd17c	184	8.2938e-11	1.14277e-09	0.0621941	-0.0286947	0.245722
Thap3	108	8.72671e-11	1.19579e-09	0.110761	0.0233861	0.180388
Gm16124	186	8.74064e-11	1.19579e-09	0.0200634	0.00145986	0.159585
Npepps	154	8.86623e-11	1.20869e-09	0.000898282	0.142737	0.0848762
Wdr45	187	9.18132e-11	1.24724e-09	0.0265239	0.00756501	0.159125
Hey1	49	9.39539e-11	1.27184e-09	0.185246	-0.245375	0.00321042
Izumo4	188	9.67227e-11	1.30474e-09	0.00085494	-0.00416884	0.106895
App	191	9.96178e-11	1.33911e-09	-0.134576	0.0964197	0.32606
Ube2f	192	1.274e-10	1.70662e-09	-0.208075	0.00156641	0.26206
Cx3cl1	157	1.47037e-10	1.96287e-09	0.0537361	0.0933883	0.0689816
Rin2	158	1.54699e-10	2.05803e-09	-0.0496716	0.177804	0.166802
Os9	194	1.56621e-10	2.07644e-09	-0.0895025	-0.0503349	0.265079
Sp140	195	1.57643e-10	2.08283e-09	0.0369156	0.0395691	0.145423
Cdkn2c	51	1.63826e-10	2.15714e-09	0.0981336	0.0461051	-0.0311714
Hist1h4h	196	1.69427e-10	2.21609e-09	0.0550806	0.0301727	0.17474
Paqr6	197	1.69452e-10	2.21609e-09	0.0126227	-0.0437062	0.205307
Trp53i11	159	1.77295e-10	2.31082e-09	0.0121429	0.0784704	0.04356
Kdm6b	160	1.8258e-10	2.3717e-09	0.0583129	0.146719	0.0331219
Tmbim1	198	1.89318e-10	2.45096e-09	-0.00418786	0.119968	0.267792
Midn	161	1.90812e-10	2.46205e-09	-0.0504548	0.15226	0.119491
Bri3	52	1.92641e-10	2.47511e-09	0.216667	0.167684	0.283807
Klhdc7a	150	1.93108e-10	2.47511e-09	0.0625737	-0.126874	0.113873
Arl13b	162	1.94465e-10	2.48426e-09	-0.0163419	0.114759	0.0371343
Fcgbp	180	2.0815e-10	2.63841e-09	0.0328304	0.0340856	0.0568737
Prkca	163	2.08583e-10	2.63841e-09	0.0140348	0.132966	0.0548658
Elf5	202	2.08381e-10	2.63841e-09	-0.00933976	-0.194799	0.255641
Clu	203	2.18999e-10	2.76111e-09	-0.659852	-0.123697	0.567512
Fcgrt	96	2.34504e-10	2.94696e-09	0.100215	0.0901389	0.165418
Egf	207	2.75688e-10	3.45327e-09	0.00730423	-0.056149	0.0972298
A530013C23Rik	53	3.42525e-10	4.27657e-09	0.1098	0.076968	0.130461
Trib1	166	3.52083e-10	4.38173e-09	-0.150365	0.20209	0.0481777
Ggh	212	3.65311e-10	4.53173e-09	-0.177339	-0.235351	0.281611
Hhipl2	213	3.70504e-10	4.58143e-09	-0.0306438	-0.00117566	0.230625
Zbtb20	214	3.76904e-10	4.64567e-09	0.0333383	0.114463	0.279303
Ifrd1	215	3.89954e-10	4.79122e-09	-0.00530169	0.150448	0.236565
Sash1	124	3.91599e-10	4.79615e-09	0.116671	0.108272	0.211877
Csf1	168	4.02509e-10	4.91418e-09	-0.000134807	0.105696	0.102061
Sectm1b	169	4.13192e-10	5.02869e-09	0.00511633	0.0583162	0.0529172
Myo1e	219	4.64017e-10	5.62949e-09	-0.137685	0.106214	0.186752
Tnfrsf21	220	4.82777e-10	5.83873e-09	-0.119807	-0.041092	0.149956
Coq8a	221	4.95097e-10	5.96901e-09	0.0479473	0.00121463	0.10614
Eif5	171	5.82254e-10	6.99793e-09	-0.0650756	0.2309	0.0551389
Hbegf	172	6.69907e-10	8.02641e-09	-0.103339	0.130883	-0.0566922
Fosl1	173	6.90467e-10	8.24713e-09	-0.00654616	0.0821057	0.055958
Foxi1	55	7.11673e-10	8.47418e-09	0.115645	-0.22492	-0.108366
Fdx1	223	8.92736e-10	1.05975e-08	-0.0551876	-0.155256	0.228691
2200002D01Rik	176	9.55817e-10	1.13115e-08	0.0230341	0.139585	0.156907
Card14	226	1.01609e-09	1.19515e-08	-0.00298979	0.0315775	0.0617087
F3	225	1.01484e-09	1.19515e-08	-0.220918	0.0477165	0.287257
Herpud1	57	1.08772e-09	1.27551e-08	0.195262	-0.193125	0.211092
Bcl10	177	1.12876e-09	1.31962e-08	-0.123502	0.159349	0.119588
Rnd1	178	1.16071e-09	1.35106e-08	0.0217832	0.095065	0.0674289
Cd164l2	227	1.16265e-09	1.35106e-08	-0.0533687	-0.0580979	0.232628
H1f0	58	1.22969e-09	1.42467e-08	0.25556	-0.0632805	0.116597
Klhdc1	199	1.26159e-09	1.45725e-08	0.0709044	0.033679	0.159629
Rdm1	59	1.29031e-09	1.48597e-08	0.144798	0.103959	0.117196
Hivep3	229	1.32383e-09	1.52004e-08	0.0462128	0.106863	0.184318
Spen	230	1.39711e-09	1.59942e-08	0.0352461	0.0634651	0.0889585
Iqsec1	137	1.45746e-09	1.66357e-08	0.0831766	0.0912505	0.144669
Rnf125	181	1.5461e-09	1.75954e-08	-0.065807	0.0830407	0.0748004
Luc7l2	151	1.64965e-09	1.87187e-08	0.127474	0.187415	0.0734167
Cck	232	1.92726e-09	2.18046e-08	-0.0824822	-0.203574	0.320273
Pqlc1	233	2.14572e-09	2.42052e-08	-0.395682	-0.0816627	0.364283
Tnfsf12	234	2.27588e-09	2.55987e-08	0.00437496	-0.026137	0.115975
Las1l	185	2.41865e-09	2.71254e-08	-0.154724	0.160367	0.0792179
Mkrn1	225	2.43987e-09	2.72841e-08	0.0870629	0.167006	0.279494
Gramd3	238	2.80607e-09	3.12885e-08	-0.0757683	0.074942	0.163863
Cirbp	139	2.85195e-09	3.17084e-08	0.122152	0.125736	0.258229
Ddx3x	187	2.93835e-09	3.25752e-08	-0.0865032	0.187049	0.0938662
Nbeal1	240	3.07946e-09	3.40417e-08	0.0202249	0.043592	0.119519
Prelp	72	3.27346e-09	3.60829e-08	0.0560518	0.0594633	0.036349
Zbtb7a	223	3.64489e-09	4.00626e-08	-0.0209771	0.138991	0.217381
Fam162a	64	3.82909e-09	4.19677e-08	0.230617	0.135471	-0.046537
Prkcd	189	3.87486e-09	4.2349e-08	0.00470095	0.108276	0.0543659
Irx3	244	4.02514e-09	4.38672e-08	-0.0280771	0.156821	0.26189
Tnip2	245	4.10155e-09	4.45741e-08	0.0161382	0.0647516	0.110664
Tspan4	190	4.47586e-09	4.83715e-08	0.0626512	0.116373	0.119399
Gcnt2	242	4.47605e-09	4.83715e-08	-0.0254106	0.0675146	0.0970249
Cdc42ep5	247	5.1859e-09	5.58861e-08	-0.0163313	-0.115089	0.17369
Cxcl12	248	5.27676e-09	5.67068e-08	0.0084135	0.00675822	0.0998789
Ptprk	191	5.4452e-09	5.83544e-08	-0.019297	0.13189	0.109054
Isg20	250	5.59151e-09	5.97564e-08	0.00626245	0.0377013	0.0625176
Eif4b	251	5.82495e-09	6.20792e-08	0.0328123	0.0655868	0.267959
Rbpms	252	5.98755e-09	6.36363e-08	-0.0886531	0.0911772	0.249918
Blcap	192	6.2165e-09	6.58881e-08	-0.0955608	0.120175	0.0813963
Ttc28	115	6.42571e-09	6.79189e-08	0.0512382	0.0379239	0.0675322
Neu2	190	7.05007e-09	7.43147e-08	0.0337962	0.00279838	0.0637561
Hexb	85	7.31587e-09	7.69063e-08	0.117238	0.126274	0.0770485
Epb41l4b	256	8.71313e-09	9.13458e-08	0.000106468	0.0405587	0.149431
Mxi1	95	9.07773e-09	9.49103e-08	0.11059	0.123371	0.123753
mt-Nd5	68	9.86078e-09	1.02819e-07	0.217971	0.0794789	0.0801547
Ctsf	257	1.00712e-08	1.0473e-07	0.0368243	0.0497306	0.117299
Tmpo	171	1.09911e-08	1.13988e-07	0.0737831	0.108932	-0.354353
4930523C07Rik	196	1.13258e-08	1.17145e-07	-0.326858	0.172929	0.0385911
Cyp24a1	259	1.20358e-08	1.24156e-07	-0.059813	0.0193169	0.113604
Mast4	197	1.21109e-08	1.24597e-07	-0.240823	0.153874	0.0834912
Lifr	260	1.25311e-08	1.28577e-07	0.0280315	0.00976846	0.0787487
Abca1	198	1.31732e-08	1.34807e-07	-0.00567876	0.0750512	0.0912192
Cxcl16	199	1.40447e-08	1.43345e-07	-0.0516237	0.0977088	0.0343876
Pgrmc1	169	1.52212e-08	1.54943e-07	0.114405	0.0280195	0.230234
Tgfb3	262	1.5285e-08	1.55183e-07	-0.0375555	-0.0999672	0.227776
Anxa1	200	1.96256e-08	1.98729e-07	-0.234976	0.191458	0.0709652
Fam213a	266	2.00213e-08	2.02205e-07	-0.163194	-0.205277	0.241738
Gm16136	74	2.18613e-08	2.20211e-07	0.140332	-0.154516	0.170477
Acadsb	267	2.19479e-08	2.20508e-07	-0.0398713	-0.0576858	0.207249
Tlr2	202	2.20961e-08	2.21421e-07	-0.120138	0.0796258	0.0350414
Pafah1b3	75	2.42018e-08	2.41893e-07	0.154952	0.143044	-0.00910411
Elf1	203	2.47199e-08	2.46433e-07	-0.0819516	0.157994	0.104477
Frat2	204	2.61826e-08	2.60342e-07	-0.00170038	0.0662549	0.0496926
Spindoc	205	2.63042e-08	2.60878e-07	-0.023039	0.0789273	0.0580547
Arl4d	128	2.67528e-08	2.64647e-07	0.0342463	0.03535	0.0469018
Kif5c	269	2.69849e-08	2.66261e-07	0.0231594	-0.0064829	0.0894325
Cited2	76	2.85629e-08	2.81111e-07	0.233892	-0.0933676	-0.12538
Gm20442	270	3.055e-08	2.99903e-07	-0.00698066	-0.0185299	0.0662531
Parm1	239	3.29018e-08	3.2217e-07	0.0590923	0.0446842	0.14748
Rragd	77	3.34742e-08	3.26945e-07	0.0940271	0.0722619	0.109327
Tead1	206	3.47592e-08	3.38639e-07	-0.0117906	0.0624751	-0.00859683
Cbx7	78	3.72047e-08	3.61551e-07	0.0528795	0.0371283	0.0427758
Iqgap1	207	3.73686e-08	3.62232e-07	-0.189765	0.173737	0.0362189
Sat1	208	3.78352e-08	3.65835e-07	-0.13183	0.244685	0.267584
Ormdl3	273	3.97165e-08	3.83066e-07	-0.0668289	-0.176943	0.182593
Oser1	209	3.98477e-08	3.83373e-07	-0.0145927	0.149593	-0.000740382
Srrm2	79	4.78571e-08	4.59286e-07	0.200688	0.168924	0.217049
Arhgap42	265	4.96454e-08	4.75265e-07	0.0313178	0.0300506	0.067254
Ndrg2	204	5.5192e-08	5.27057e-07	0.0538135	0.0816858	-0.0347025
Chpt1	211	6.06518e-08	5.77765e-07	0.076195	0.144495	0.185797
Nrip1	212	6.09141e-08	5.78834e-07	-0.108736	0.107746	0.0530057
Ovol1	213	6.28431e-08	5.95697e-07	-0.0715569	0.0628126	0.0199651
Bhlhe41	275	6.4556e-08	6.10434e-07	0.0121747	0.0262747	0.0406299
Cln3	148	6.73801e-08	6.3558e-07	0.0790938	0.0397042	0.131321
Car12	86	7.006e-08	6.59248e-07	0.156796	0.0263001	0.2294
Thra	103	7.51534e-08	7.05455e-07	0.104577	0.0941238	0.150455
Clk1	215	7.73884e-08	7.24671e-07	0.0689441	0.153371	0.193679
Casz1	280	7.89372e-08	7.37385e-07	-0.0100945	0.0801253	0.133363
Klf2	83	8.26076e-08	7.67952e-07	0.095596	0.0176734	0.0487137
Padi2	281	8.25909e-08	7.67952e-07	-0.0329675	0.00968396	0.112804
Arid5a	282	8.91113e-08	8.26422e-07	-0.102034	0.0107648	0.178083
Cdkn1c	283	8.93903e-08	8.27021e-07	-0.0479326	-0.0332317	0.148923
Gm43672	284	8.9958e-08	8.30282e-07	0.00728293	0.0149644	0.0584372
Gbp2	216	9.517e-08	8.76291e-07	-0.0560473	0.0873906	0.0940933
Mafg	217	9.82428e-08	9.02431e-07	-0.0670097	0.135451	0.0371666
Heg1	218	9.93206e-08	9.10163e-07	0.0445826	0.0879423	0.101072
Rock2	219	1.009e-07	9.22448e-07	-0.0221731	0.101669	-0.0649764
Add3	90	1.09593e-07	9.99549e-07	0.102589	0.0729729	0.137274
Rbm47	287	1.1334e-07	1.03129e-06	0.00524113	0.026546	0.192111
Xpa	288	1.13867e-07	1.03365e-06	0.0130896	-0.00173719	0.117023
Srpr	289	1.14296e-07	1.03511e-06	-0.201624	-0.12931	0.228365
Etnk1	290	1.15247e-07	1.04127e-06	-0.175572	-0.497689	0.329884
Pold4	291	1.16267e-07	1.04803e-06	-0.0241963	-0.0668502	0.23296
Galm	142	1.30051e-07	1.16955e-06	0.0626262	0.0374059	0.097336
Skil	221	1.35349e-07	1.21436e-06	-0.113519	0.126661	0.0598953
Muc15	293	1.35971e-07	1.21711e-06	-0.0776986	-0.0351763	0.249223
Clcn3	294	1.41182e-07	1.25914e-06	0.0540087	0.00582233	0.20501
Sectm1a	295	1.41319e-07	1.25914e-06	-0.0343395	0.00533132	0.0722616
Csdc2	296	1.43225e-07	1.27318e-06	0.0264788	0.020643	0.0997163
Ttll10	299	1.4963e-07	1.32707e-06	0.000626588	0.00200507	0.0418615
Zwint	222	1.51938e-07	1.34444e-06	-0.033494	0.129976	-0.0331559
Nos1ap	212	1.55834e-07	1.37576e-06	0.0641543	0.0897514	0.128386
Top1	224	1.61552e-07	1.42299e-06	-0.442374	0.225101	-0.133945
Nfkb2	226	1.69577e-07	1.49027e-06	-0.0339285	0.0769101	0.0644046
Tgm1	227	1.78695e-07	1.56683e-06	-0.312223	0.120786	0.0644638
Bag3	243	1.80941e-07	1.58293e-06	-0.0921947	0.116104	0.149411
St14	235	1.83674e-07	1.6032e-06	-0.0123055	0.155826	0.206088
Arih1	228	1.86099e-07	1.6207e-06	-0.0108967	0.113724	0.0637806
Fas	303	1.96375e-07	1.70634e-06	-0.0581219	0.0451599	0.0654801
Cebpg	230	2.15269e-07	1.86631e-06	-0.000542913	0.147427	0.175761
Plekhn1	306	2.2166e-07	1.91741e-06	0.0209523	0.0177715	0.0904666
Tgoln1	307	2.24531e-07	1.9379e-06	-0.0435072	0.0585042	0.199147
Cd27	91	2.31117e-07	1.99029e-06	0.0791017	0.0576526	0.0192486
Smim22	308	2.33371e-07	2.00522e-06	-0.102225	-0.141896	0.269421
Gan	232	2.39284e-07	2.05146e-06	-0.00691295	0.0737316	0.0442874
March7	233	2.41921e-07	2.06947e-06	-0.0127206	0.126089	0.111849
1110032A03Rik	309	2.50179e-07	2.13538e-06	-0.0130318	-0.0723142	0.169165
Spag9	236	2.73634e-07	2.33042e-06	-0.0102361	0.12375	0.0915461
Casp4	311	2.76044e-07	2.34577e-06	-0.0714803	0.0503644	0.192472
Rorc	92	3.00799e-07	2.55051e-06	0.0955063	0.0791995	0.129336
Slc3a2	312	3.11611e-07	2.63639e-06	0.00650786	0.162865	0.26662
Plekhs1	314	3.18234e-07	2.68654e-06	-0.0513733	0.0457079	0.0764282
Map3k1	237	3.26966e-07	2.75422e-06	-0.00059162	0.0921722	0.107719
AI413582	93	3.36581e-07	2.82904e-06	0.127474	0.00308287	0.0862689
Tiparp	238	3.43978e-07	2.88493e-06	0.0235713	0.09091	0.0849657
Sertad1	240	3.55077e-07	2.97155e-06	-0.067979	0.0931254	0.0524972
Diaph2	316	3.68675e-07	3.07868e-06	0.00792074	0.00696051	0.0766426
Mllt6	241	3.72918e-07	3.10738e-06	0.0391912	0.0762209	0.0477524
Tmprss13	317	3.7941e-07	3.15467e-06	-0.0206962	0.0249864	0.115875
Kxd1	318	4.16957e-07	3.4594e-06	0.00257609	-0.00120698	0.192889
Raph1	244	4.33431e-07	3.58836e-06	0.0210541	0.0894544	-0.0209261
Rdh10	245	4.35438e-07	3.59726e-06	-0.0667307	0.0938303	0.0810218
Cebpa	319	4.41718e-07	3.64134e-06	0.0113138	-0.00914159	0.050084
Gm44386	228	4.47232e-07	3.67893e-06	0.0401398	0.0194999	0.0775977
Ywhag	246	4.64859e-07	3.8158e-06	-0.211019	0.124274	-0.198145
Chd1	247	4.91874e-07	4.02898e-06	0.0240029	0.0923611	0.0347875
Ehf	322	5.02354e-07	4.10611e-06	-0.0705207	0.104533	0.233267
Scarb2	248	5.14011e-07	4.19251e-06	-0.0492697	0.138148	0.188205
Dpyd	323	5.16732e-07	4.20581e-06	0.0307973	0.0316244	0.0856883
Acadm	269	5.2257e-07	4.24437e-06	0.0716746	0.0208237	0.179622
Cldn1	249	5.30102e-07	4.2965e-06	-0.101019	0.0981031	0.0106969
Serpinb6a	208	5.35521e-07	4.33132e-06	0.107034	0.159761	-0.0909048
Kansl3	251	5.78712e-07	4.67086e-06	0.0355707	0.0934136	0.0932486
Hebp1	327	5.97462e-07	4.81213e-06	-0.000255564	-0.0556463	0.202258
Ell	304	6.01365e-07	4.83347e-06	-0.0225553	0.0690519	0.0881168
Zfp655	252	6.3468e-07	5.09064e-06	-0.114441	0.101435	0.115722
Rab3a	100	7.05277e-07	5.64514e-06	0.0537584	-0.11972	-0.0489798
Arg1	331	7.21602e-07	5.76385e-06	-0.42975	-0.635372	0.415978
Cxcl2	255	7.27621e-07	5.79992e-06	-0.108596	0.138426	0.0703262
Vegfa	101	7.31556e-07	5.81926e-06	0.0686555	0.0480307	0.0695912
Rhou	333	7.76978e-07	6.16786e-06	-0.0973997	0.0615743	0.15125
Clk4	257	7.79735e-07	6.17704e-06	0.0337791	0.109416	0.100094
Zfp395	102	7.92796e-07	6.26763e-06	0.106646	-0.0746505	0.0297241
Lrg1	258	8.21796e-07	6.48362e-06	-0.0179132	0.150334	0.13484
Clec2d	337	9.25482e-07	7.28675e-06	0.0335933	0.0515608	0.0837533
Ppp1cb	338	9.3427e-07	7.34096e-06	-0.0612801	-0.201355	0.220823
Golga4	339	9.96138e-07	7.81118e-06	-0.0221314	0.0276071	0.164339
Igsf8	259	1.01934e-06	7.97689e-06	0.0406484	0.143297	0.178952
Sh3d21	154	1.04057e-06	8.12656e-06	0.0401873	0.0410758	0.0594576
Itm2c	342	1.10947e-06	8.64711e-06	-0.341464	-0.305722	0.216438
Tnfaip3	261	1.12143e-06	8.70517e-06	-0.0440264	0.0596883	0.0429041
Jak1	343	1.12055e-06	8.70517e-06	-0.0886795	0.0862413	0.212251
Slc6a8	272	1.13443e-06	8.78842e-06	0.0408134	0.121427	0.17811
Samd4b	262	1.18055e-06	9.12739e-06	-0.0408643	0.0945179	0.00514816
Crb3	263	1.21776e-06	9.39626e-06	-0.2543	0.148227	0.0929107
Rarg	247	1.22155e-06	9.40666e-06	0.0431515	0.0703184	0.0712395
Dnajb9	344	1.25653e-06	9.65677e-06	-0.016802	-0.0464345	0.185005
Eno1	244	1.2687e-06	9.73088e-06	0.096651	-0.120162	0.282239
Crispld2	348	1.31306e-06	1.00512e-05	-0.239107	-0.0182244	0.202726
Wisp2	136	1.38278e-06	1.05639e-05	0.0371106	0.0404914	0.049655
Slc38a2	265	1.40481e-06	1.0711e-05	-0.0304446	0.148836	-0.00867067
Ctsh	350	1.44844e-06	1.10219e-05	-0.462607	-0.393777	0.250402
Vdr	351	1.47455e-06	1.11984e-05	-0.166196	0.0268245	0.0988841
Sbds	267	1.48435e-06	1.12397e-05	0.0223128	0.142644	0.175366
Hivep2	268	1.48581e-06	1.12397e-05	-0.0404565	0.0732724	0.050431
Fn3k	189	1.50392e-06	1.13323e-05	0.0593593	-0.00154038	0.102653
Ggt1	352	1.50271e-06	1.13323e-05	0.016575	0.00336335	0.0672224
Susd6	354	1.53461e-06	1.1541e-05	-0.00240347	0.0812294	0.128627
Ptbp3	270	1.60914e-06	1.20779e-05	-0.090582	0.117096	0.0188239
Slco1a5	112	1.64392e-06	1.2315e-05	0.0532464	0.0473632	0.0599301
H2-K1	355	1.66134e-06	1.24214e-05	-0.362758	-0.305246	0.292793
Itpk1	120	1.68873e-06	1.26018e-05	0.0615848	0.0251546	0.0782553
Pmm1	113	1.86322e-06	1.3877e-05	0.134687	0.0764023	0.00231429
Atp6ap2	357	1.91427e-06	1.42297e-05	-0.0544107	0.00465538	0.191974
Bcl2l14	358	2.1125e-06	1.56732e-05	-0.725458	-0.169374	0.302522
Acsf2	360	2.18524e-06	1.61817e-05	-0.0432247	-0.176273	0.175622
Irak2	361	2.22154e-06	1.64189e-05	0.0225843	0.0306181	0.0662573
Wee1	273	2.27655e-06	1.67934e-05	-0.0168384	0.0839568	-0.0113686
Plekhj1	116	2.31653e-06	1.70557e-05	0.130209	0.0439649	0.179187
Gm42418	213	2.58195e-06	1.89736e-05	0.151252	0.123307	0.343387
Iqcc	367	2.66878e-06	1.95745e-05	0.0181799	-0.0277725	0.0990263
Fndc5	242	2.74128e-06	2.0068e-05	0.0356411	0.0550078	0.0162546
Tsc22d2	117	2.86835e-06	2.09189e-05	0.133302	0.0172075	0.0657658
Ddo	368	2.86478e-06	2.09189e-05	-0.0410949	-0.112684	0.122254
Foxo1	279	2.90603e-06	2.11537e-05	0.00550254	0.10117	0.0591131
Borcs6	369	3.04489e-06	2.21227e-05	-0.0168108	0.0262042	0.0922584
Stx3	281	3.14667e-06	2.28193e-05	-0.0451954	0.0918877	0.0728003
Pttg1ip	370	3.15518e-06	2.2838e-05	0.0469391	0.0305933	0.148832
Gna14	371	3.23634e-06	2.33816e-05	-0.0648883	-0.00420242	0.120828
Shroom1	373	3.57947e-06	2.58123e-05	0.0158973	0.0155904	0.0492449
Tead2	374	3.62357e-06	2.60816e-05	0.0652027	0.0126443	0.191959
Uap1	284	3.90508e-06	2.80555e-05	-0.366653	0.146295	0.0724757
Rel	285	3.94042e-06	2.82568e-05	-0.0109052	0.0458698	0.0198023
Mafb	121	4.02123e-06	2.87828e-05	0.0969677	-0.0132289	0.0683178
Med13l	286	4.03293e-06	2.88131e-05	0.0104607	0.078337	0.03964
Slc20a1	288	4.3064e-06	3.071e-05	-0.122573	0.118499	-0.0988724
Urah	378	4.48694e-06	3.19384e-05	-0.311083	-0.294904	0.251827
Bsdc1	379	4.58519e-06	3.25776e-05	-0.0216503	0.0669327	0.142503
Gpr160	246	4.68359e-06	3.32008e-05	0.0253802	0.0382121	0.0239837
Fgfr1	381	4.69011e-06	3.32008e-05	0.00701348	-0.00735745	0.162733
Ocln	292	4.75563e-06	3.3603e-05	-0.14789	0.0748584	0.0244151
Higd1a	222	4.81669e-06	3.39722e-05	0.143433	0.209828	-0.122158
Prr13	294	4.92773e-06	3.46919e-05	0.0733987	0.153813	0.184377
Bzw2	296	5.41286e-06	3.80379e-05	-0.217304	0.153482	0.108091
Cldn7	297	5.51252e-06	3.86678e-05	-0.775015	0.186471	-0.376753
Trim8	383	5.59115e-06	3.91482e-05	0.024836	-0.0763294	0.16562
Cdh1	298	5.6953e-06	3.98052e-05	-0.130639	0.11137	0.00743813
Rab11fip1	299	5.9362e-06	4.14139e-05	-0.0512932	0.0749682	0.0658364
Tmem35b	384	6.12158e-06	4.25533e-05	0.0245267	0.0176234	0.0828914
Ythdc1	301	6.11106e-06	4.25533e-05	0.0177374	0.113415	-0.00432383
Ngef	385	6.14443e-06	4.26353e-05	0.0189646	0.0166809	0.0450516
Dnajb2	386	6.24838e-06	4.32787e-05	-0.00291758	0.0611146	0.124638
Ppt1	387	6.31337e-06	4.35731e-05	-0.00866584	-0.0670539	0.192518
Tpbg	302	6.31347e-06	4.35731e-05	-0.0278321	0.053372	-0.0361442
Pnisr	219	6.4504e-06	4.44386e-05	0.10959	0.0441572	0.211016
A530010L16Rik	319	7.141e-06	4.91087e-05	0.0258368	0.00394057	0.0486041
Rflnb	371	7.32723e-06	5.02997e-05	0.0589476	0.0619994	0.124245
Ccrl2	391	7.6569e-06	5.24695e-05	-0.0101286	0.0502968	0.0696002
Pcmtd1	392	7.73538e-06	5.29133e-05	0.0355802	-0.0307204	0.173152
Eif3j2	303	7.80729e-06	5.33107e-05	-0.165772	0.150486	-0.000755483
Ankrd12	393	7.90319e-06	5.38701e-05	-0.0116938	-0.00966638	0.171257
Mup6	394	8.11308e-06	5.52033e-05	0.0197169	-0.0332858	0.0793787
1500015A07Rik	155	8.44577e-06	5.73658e-05	0.0423788	0.0468964	0.0365608
Ahcyl2	397	8.72069e-06	5.90253e-05	0.0246375	0.0401387	0.0805665
Ip6k1	396	8.7162e-06	5.90253e-05	0.0185487	0.039753	0.0993706
Med13	306	8.7778e-06	5.93078e-05	-0.0278276	0.0692893	0.022588
Mpst	398	9.21836e-06	6.21756e-05	-0.0205269	0.000747659	0.195592
Sgms2	308	9.40054e-06	6.32937e-05	-0.0539392	0.0768759	0.0716968
Tk2	400	9.47211e-06	6.36644e-05	0.0237212	-0.00662226	0.071542
Fam83h	310	9.88933e-06	6.63531e-05	-0.0041842	0.0635935	0.0289742
Stat5a	401	9.95959e-06	6.67085e-05	-0.103307	-0.0757874	0.138935
A2m	311	9.98492e-06	6.67622e-05	0.0206005	0.069552	0.06058
Mef2a	312	1.00504e-05	6.70838e-05	0.035717	0.0634412	0.0329209
Phf11d	402	1.03751e-05	6.90122e-05	-0.0558913	0.054188	0.100672
Prss22	313	1.03734e-05	6.90122e-05	-0.1879	0.0644704	-0.165254
Dmkn	314	1.04638e-05	6.94822e-05	0.019222	0.0429499	0.0202774
Lcn2	315	1.06133e-05	7.03544e-05	-0.534484	0.179065	-0.148165
Vcl	316	1.07472e-05	7.11196e-05	-0.0121671	0.0710408	-0.0437091
Plekhg6	403	1.11169e-05	7.344e-05	0.00873644	0.025142	0.053812
Pik3ip1	143	1.13854e-05	7.49573e-05	0.0738332	-0.0605536	0.104783
Akap11	317	1.13844e-05	7.49573e-05	-0.00281439	0.065854	0.00713809
Nectin2	318	1.15829e-05	7.61275e-05	-0.12496	0.116526	0.13679
Mlf1	319	1.21522e-05	7.97331e-05	-0.0211166	0.0398821	-0.135309
Syf2	408	1.2206e-05	7.99503e-05	0.0480878	0.00602411	0.151353
Tcp11l2	409	1.24389e-05	8.1338e-05	-0.0119639	0.0351155	0.115466
Auts2	410	1.29355e-05	8.44419e-05	0.0298334	-0.120933	0.272404
Yipf2	411	1.3659e-05	8.90144e-05	-0.134838	-0.184167	0.107837
Sh3bp2	321	1.39632e-05	9.08433e-05	-0.0160921	0.0390306	0.0272946
Ubr5	322	1.46192e-05	9.49511e-05	0.00430383	0.077118	0.0144082
Dusp1	125	1.48318e-05	9.61697e-05	0.105052	0.0740477	0.0717425
Plb1	414	1.52847e-05	9.89405e-05	-0.0739477	-0.224113	0.331208
Rmdn1	415	1.55122e-05	0.000100244	-0.0127345	-0.0825157	0.120386
Cited4	127	1.56677e-05	0.00010108	0.168619	-0.944408	0.0884223
Pmepa1	324	1.592e-05	0.000102537	-0.101485	0.151127	0.182125
Irx2	417	1.6582e-05	0.000106622	0.0457826	-0.12428	0.18009
Arhgef5	325	1.67497e-05	0.000107521	-0.00909101	0.0945254	0.0856802
Ghr	191	1.71101e-05	0.000109653	0.0539919	0.0682231	0.0559277
Ikzf4	419	1.89352e-05	0.000121148	-0.0369131	0.0224075	0.0493984
Egln1	129	2.02639e-05	0.000129434	0.0578517	0.0473166	0.0298112
Pcf11	140	2.16208e-05	0.000137873	0.0723026	0.0730854	0.0439468
Zfp651	310	2.2279e-05	0.000141835	0.0199031	2.42748e-05	0.0333429
Pim3	131	2.2339e-05	0.000141983	0.0853436	-0.00794315	0.0670177
Sox9	333	2.25897e-05	0.00014334	-0.0404544	0.148661	0.153918
Cyr61	335	2.30643e-05	0.000146112	-0.00176427	0.145391	0.118857
Zswim4	336	2.35742e-05	0.000149097	-0.0149994	0.0421222	0.0162538
Chd3	202	2.51992e-05	0.000159114	0.0470683	0.0536677	-0.0835587
Ldha	198	2.55631e-05	0.000161148	0.115814	-0.0872251	0.257201
Socs5	338	2.59455e-05	0.000163292	-0.130293	0.088334	0.0879378
BC005561	339	2.62595e-05	0.000164998	-0.099526	0.0958922	-0.0619448
Rexo2	425	2.68348e-05	0.000168339	0.023458	-0.117757	0.20258
Fbxo31	133	2.77897e-05	0.000174046	0.0644941	0.00178367	0.0801201
Zcchc7	318	2.7898e-05	0.000174442	0.0497525	0.0813553	0.0640289
Cdk19	314	3.05398e-05	0.000190652	0.0291316	0.0477911	0.0511432
Phyh	427	3.06544e-05	0.000191058	-0.153224	-0.244417	0.176721
Pfkl	232	3.14234e-05	0.000195534	0.0859856	-0.103646	0.23349
Hs2st1	343	3.22244e-05	0.000200196	-0.0407825	0.113057	-0.0264466
Nop58	344	3.2748e-05	0.000203122	-0.148451	0.127639	-0.0903954
2810474O19Rik	345	3.29444e-05	0.000204012	-0.137037	0.0985696	0.0243276
Nfasc	429	3.34871e-05	0.00020704	0.0138237	0.0208842	0.0355617
Myh9	347	3.37632e-05	0.000208414	-0.0189938	0.108016	0.0650451
Rtn2	183	3.47208e-05	0.000213982	0.0346194	0.0358523	0.0444193
Ephx1	134	3.54607e-05	0.000218194	0.0644801	0.053886	0.0432479
Stbd1	350	3.59391e-05	0.000220785	-0.00218184	0.0466605	0.0321739
Rara	351	3.6191e-05	0.000221979	0.00226937	0.0571575	0.0559566
Hipk1	352	3.67451e-05	0.00022502	-0.0852833	0.0837871	0.0713106
Scube1	432	3.6839e-05	0.000225237	0.0194696	0.0281152	0.0401228
Hspa2	433	3.97318e-05	0.00024254	-0.0630409	0.0152251	0.151919
Hs3st6	277	4.00884e-05	0.00024433	0.023549	-0.00178893	0.0329947
Ccnl2	435	4.04185e-05	0.000245954	-0.0210131	0.0600496	0.133114
Rabgef1	438	4.27135e-05	0.00025951	-0.00773734	0.0576932	0.0887578
Ptgds	138	4.29675e-05	0.000260642	0.043719	0.0390195	-0.0473942
Palld	355	4.3108e-05	0.000261084	0.00275361	0.052659	0.0367534
Arg2	439	4.3438e-05	0.000262671	0.00612466	-0.017454	0.074525
Ttc14	158	4.50268e-05	0.000271852	0.122538	0.124466	0.0754433
Akap8l	141	4.53575e-05	0.000273421	0.0653509	0.037378	0.0429298
Slc7a6os	216	4.61336e-05	0.000277665	0.0507324	0.0648245	0.0494874
Pnpo	440	4.67396e-05	0.000280875	-0.00315148	-0.0313889	0.0998333
Ccnt1	359	4.69733e-05	0.00028184	0.0315929	0.0822718	0.0171684
Ggt6	441	4.83568e-05	0.000289691	0.014692	0.00210642	0.0324938
N4bp1	360	4.85927e-05	0.000290652	-0.0375032	0.0691573	0.0498288
Tnf	361	5.00114e-05	0.000298675	-0.0512257	0.0569037	0.0207514
Trip10	379	5.14472e-05	0.000306775	0.0349008	0.0559676	0.0799709
Ddx21	363	5.29549e-05	0.000315278	-0.050231	0.0870173	-0.00160873
C4b	364	5.43267e-05	0.000322947	-0.00524723	0.048109	0.0323325
Frmd6	365	5.79374e-05	0.000343881	0.00357832	0.0421119	0.00958577
Ssh3	443	5.92715e-05	0.000351259	0.00273112	0.00919902	0.0557292
Cdc42ep3	374	6.04566e-05	0.000357733	-0.335103	0.143112	0.191124
Tcn2	444	6.14479e-05	0.000363041	-0.420993	-0.551601	0.184981
Snhg11	445	6.48081e-05	0.000382308	0.0133498	0.000361195	0.0311522
Stac2	446	6.5759e-05	0.000387325	0.0568222	0.0667025	0.197384
Ar	448	6.74222e-05	0.000396516	-0.0117052	-0.00272802	0.0672416
Plekhf1	144	6.99071e-05	0.000409881	0.060461	-0.071208	0.0365613
Foxq1	368	6.98981e-05	0.000409881	0.00751173	0.022262	0.0205993
Pdlim5	369	7.0988e-05	0.000415587	-0.08666	0.0727521	0.0472614
Tob2	146	7.1597e-05	0.000418517	0.0743208	0.0255567	0.0819423
C2cd4b	357	7.22894e-05	0.000421925	0.0431659	0.0230201	0.0847764
C1rl	451	7.28248e-05	0.000424408	-0.0299028	-0.0639213	0.093682
Plekho2	453	7.33571e-05	0.000426865	0.00561526	0.0173575	0.0539479
Foxn3	370	7.36432e-05	0.000427885	0.0378128	0.0769856	0.0463755
Klf7	371	7.38308e-05	0.00042833	0.0153417	0.0598828	0.0596001
Isoc2b	454	7.4314e-05	0.000430485	0.00550047	0.0170824	0.0534013
Hk2	455	7.652e-05	0.0004426	-0.00250484	0.0178998	0.0934635
Lncpint	181	7.72749e-05	0.000446297	0.0588217	0.054789	0.0768956
Tmem125	457	8.2157e-05	0.000473784	-0.0347333	0.0247401	0.0702802
Slfn2	458	8.43277e-05	0.000485577	-0.110836	-0.00959942	0.0770333
Nup98	375	8.47845e-05	0.000487479	0.018326	0.0738782	0.0718277
Itga2b	316	8.53665e-05	0.000489367	0.0260546	0.0386789	0.00903145
Spop	459	8.53462e-05	0.000489367	-0.00368084	-0.053293	0.12444
Amotl2	282	8.80789e-05	0.000504167	0.0340501	0.0512739	0.0345192
Tob1	149	9.03619e-05	0.000516468	0.0880089	-0.0183825	-0.0350421
Csrnp1	415	9.53172e-05	0.000543985	0.0305907	0.0583462	0.0746966
Rc3h1	380	9.67998e-05	0.00055163	-0.0477236	0.0569788	0.0168232
D7Ertd443e	462	9.69865e-05	0.000551879	-0.0249002	0.000302357	0.0592296
Kiss1r	152	9.85759e-05	0.000559965	0.0426155	0.0230241	0.0358272
Pdlim7	381	9.86978e-05	0.000559965	0.0268146	0.053328	-0.0141065
Akt3	382	0.000100935	0.000570976	0.0237211	0.0453517	0.0410427
5830454E08Rik	464	0.000100868	0.000570976	0.0136736	0.00291357	0.0309288
Cttn	465	0.000105309	0.00059485	-0.127759	-0.0831004	0.144956
Gng7	370	0.000106459	0.000600467	0.0252937	0.0412744	0.0120374
Fam84a	385	0.000112068	0.000631178	-0.0588245	0.0432364	-0.00168701
Mcfd2	466	0.000112905	0.000634965	-0.128116	-0.120155	0.154163
Syce2	179	0.000113195	0.000635674	0.0421883	0.0451088	-0.421737
Foxc1	209	0.000118178	0.000662517	0.0563037	0.0706919	0.0574777
Mroh1	414	0.000118319	0.000662517	0.0120926	0.0454534	0.0580575
Gm32591	467	0.000118491	0.000662521	-0.00125423	-0.020715	0.0239667
Fam214a	468	0.000119343	0.000666319	-0.0483957	-0.0011377	0.0759415
Stx11	388	0.000120542	0.000671068	-0.036636	0.0317601	0.0247822
Rhob	469	0.000120523	0.000671068	-0.337467	0.0990394	0.223398
Cnn3	471	0.000121237	0.000673967	-0.389433	0.036239	0.157024
Phc3	472	0.000123097	0.000683319	0.00245777	0.0414036	0.0757793
Nktr	473	0.000126829	0.000703025	-0.0473487	-0.0470102	0.157944
Slc35e4	389	0.000128293	0.000710121	-0.0289427	0.080852	0.0995927
Gm31108	474	0.000128676	0.00071122	-0.036983	-0.129466	0.0895643
Lamb2	475	0.000129012	0.000712058	0.00032658	0.0349308	0.112159
Crebrf	328	0.000130794	0.000720861	0.0364865	0.0449247	0.0702585
Wdr72	477	0.000131943	0.000726158	-0.00524766	-0.000265952	0.0458468
Igfbp7	478	0.000132282	0.000726988	0.019599	0.0144753	0.0732161
Pgp	479	0.000134332	0.000737201	-0.0101881	-0.836179	0.240101
Igsf3	390	0.000137156	0.000751629	-0.0324594	0.0743804	-0.0785282
Cuedc1	481	0.000140651	0.000769691	0.0388899	0.0231644	0.123583
Hist1h2bc	482	0.000144009	0.00078684	0.0464235	-0.237718	0.28221
Ier5l	337	0.000144193	0.00078684	0.0278371	0.0427879	-0.0163161
Eif4ebp1	483	0.000147366	0.000803022	0.0216127	0.0417014	0.170884
Ezr	484	0.000148258	0.000806741	-0.27221	0.056243	0.15805
Tspan5	349	0.000148929	0.000809249	0.0285492	0.0428065	0.0132298
Etf1	394	0.000154521	0.000838454	-0.071514	0.0953309	-0.0689571
Ppp1r37	486	0.000156633	0.000848723	-0.00243741	-0.0258042	0.110741
Zcchc2	395	0.000157662	0.000853099	0.00435203	0.047898	0.0143103
Tbc1d17	487	0.00016174	0.000873938	0.0303	-0.00500274	0.0996166
Rgma	159	0.000163541	0.000882437	0.0552466	0.0282886	0.031534
Dapk1	488	0.000165344	0.000890917	0.00585289	-0.0214898	0.0821322
Mcee	489	0.000167498	0.000901268	0.0614336	-0.0999616	0.16439
Fam129b	396	0.000169412	0.000910295	0.0130713	0.100271	0.0940791
Uba7	490	0.000173474	0.000930519	0.00388338	0.00283936	0.0292978
Svil	491	0.000173658	0.000930519	-0.0474861	0.0197439	0.115551
Mllt3	161	0.000180282	0.00096467	0.0939008	-0.0208481	0.0778602
Rnf11	493	0.000182964	0.000977666	-0.0671106	0.0833721	0.146005
Setd5	162	0.000184785	0.000986029	0.0884765	0.0617572	0.0495927
Srxn1	397	0.000185795	0.000988687	0.0163967	0.0877277	-0.0468181
Naga	494	0.000185679	0.000988687	-0.0122117	-0.0298521	0.0935959
Mxd4	495	0.000187945	0.000998751	-0.222902	-0.229884	0.151824
Pacsin3	399	0.000188519	0.00100042	0.0210971	0.0898688	0.0588652
Plaur	400	0.00018999	0.00100684	-0.0123693	0.0349445	0.0265465
Cyb5a	496	0.000190465	0.00100798	-0.113218	-0.220296	0.185822
Arih2	401	0.000192767	0.00101876	0.0155376	0.0595525	0.0333019
Tgfb2	498	0.000195055	0.00102944	-0.0416983	-0.0581856	0.0898012
Hook2	419	0.000196262	0.00103299	0.0319102	0.0415376	0.0694809
Phf13	402	0.0001961	0.00103299	-0.00699091	0.0444146	0.0437879
AL590144.2	500	0.000198824	0.00104504	-0.000414232	0.00383397	0.0639509
Hnrnpu	403	0.000200435	0.00105208	-0.0393836	0.118214	-0.315135
Eif1a	404	0.000201308	0.00105522	-0.226766	0.112553	0.135478
Fam212a	163	0.000204225	0.00106906	0.039965	-0.113154	0.0235725
Vipr1	501	0.000211757	0.00110699	0.020219	-0.0289594	0.0895678
Plekhm1	406	0.00021774	0.00113673	-0.0419748	0.0419121	0.0345998
Cyba	407	0.000219014	0.00114183	0.0191636	0.0648346	-0.28237
Arhgef26	409	0.000221167	0.0011515	-0.00575626	0.0566586	0.0433993
1200007C13Rik	410	0.000226325	0.00117677	0.0111953	0.0483118	0.029155
Taf3	164	0.000229304	0.00118905	0.0608652	-0.00238904	-0.0684431
Il6st	413	0.000229179	0.00118905	-0.0357902	0.0540831	0.0391032
Adrb1	166	0.000244095	0.00126405	0.0825969	-0.141828	0.0646794
Zfp182	443	0.000246811	0.00127641	0.0121913	0.00441905	0.0208391
Tmem52	507	0.000247622	0.00127888	0.0072473	0.00798115	0.0193693
Bcar1	508	0.000252882	0.0013043	-0.0794438	0.0434498	0.106294
Nmnat3	245	0.000259425	0.00133626	0.0257909	0.00677041	0.0351733
Mccc1	511	0.000260189	0.00133663	0.015848	0.0110662	0.0683144
Cmbl	510	0.000260144	0.00133663	-0.0149325	-0.0194735	0.0416896
Rad52	418	0.000268629	0.00137791	-0.0149663	0.0457718	0.0161123
Anxa2	419	0.000268939	0.00137791	-0.25579	0.141597	0.172528
Itpr2	512	0.000269511	0.00137901	0.0117828	0.033488	0.125073
Kctd13	173	0.000270697	0.00138287	0.037556	0.00261841	0.0425927
Ano1	513	0.000270983	0.00138287	-0.236123	-0.397876	0.193674
Fbxo2	421	0.000274149	0.00139718	0.0214335	0.04052	0.0376383
Cltb	422	0.00027683	0.00140899	-0.171774	0.123441	-0.0565908
Sytl3	167	0.000277711	0.00141161	0.0573391	-0.0805686	0.0611162
Agtrap	514	0.000278261	0.00141254	0.0111308	-0.0187028	0.0688507
Abcg1	483	0.000282009	0.00142969	0.0194296	0.0228585	0.0372568
Plekha1	425	0.000287335	0.00145478	-0.0112381	0.0482811	0.0247815
Ypel5	517	0.000293964	0.00148638	-0.067616	0.0548943	0.121837
Esyt3	518	0.000294911	0.00148922	0.0122409	0.044742	0.0626193
Ash1l	426	0.000297723	0.00150146	0.0151563	0.0944535	0.00344405
Heca	427	0.000299353	0.00150771	-0.00440273	0.0425271	0.0222671
Nfil3	519	0.000301249	0.00151528	-0.132667	0.0342328	0.0787896
Ranbp2	428	0.000302647	0.00152033	0.0351881	0.0682146	0.00654041
Eps8l2	520	0.000308239	0.00154641	-0.00730557	-0.0246273	0.129882
4932422M17Rik	170	0.000310063	0.00155354	0.0243078	0.0152293	0.0128624
Ppil6	522	0.000310523	0.00155382	0.00618223	0.00136898	0.0211933
Bnip3l	429	0.00031108	0.00155459	0.0349051	0.117522	0.125969
Tcim	523	0.000314095	0.00156763	-0.0448283	0.0530314	0.0878066
Hist2h4	187	0.000320877	0.00159735	0.0332355	0.0354398	0.0176369
Il10rb	525	0.000320629	0.00159735	0.0174741	-0.0274944	0.0987341
Slc6a14	430	0.00032239	0.00160281	-0.109088	0.0597288	0.0359265
Acbd4	273	0.000327845	0.00162783	0.051233	0.0417621	0.0859899
Fam13a	527	0.000330511	0.00163896	0.0205109	-0.121523	0.183626
Bcl2	528	0.000339887	0.00168329	-0.022047	-0.0899213	0.0959877
Ubap1	529	0.000343786	0.00170042	0.00877858	0.0196761	0.0704012
Btbd9	530	0.000351599	0.00173684	-0.0169856	0.0283582	0.0801845
Plpp3	172	0.000361161	0.00178179	0.0530111	-0.0367133	-0.00528805
Rassf9	531	0.000364986	0.00179836	0.0125005	-0.0268876	0.0406046
Mpzl3	505	0.000373461	0.00183777	-0.0327604	0.0593558	0.0827573
Rgcc	174	0.000378273	0.00185908	0.078413	-0.0296542	0.0431317
Steap3	436	0.000383314	0.00188146	-0.00980082	0.0242494	-0.0103206
Lrrc8a	438	0.000390746	0.0019155	0.0151293	0.0761842	0.033105
Son	439	0.000395324	0.00193548	0.0170144	0.119908	0.143358
Sp100	534	0.000398943	0.00195073	0.0123629	0.0147343	0.0264604
Plec	440	0.000401189	0.00195922	-0.0645246	0.0723908	0.0092335
Lysmd3	441	0.000403393	0.0019675	0.00824273	0.04145	0.038273
Phlda2	177	0.000410205	0.00199819	0.0509132	-0.0494006	0.0254892
Enpp5	272	0.000411633	0.00200263	0.0529384	0.0578881	0.102432
March8	537	0.000415087	0.00201689	-0.0395585	-0.0396356	0.0712925
Scnn1b	538	0.000427123	0.00207276	-0.00652279	-0.0298127	0.0558918
Cry1	475	0.00043278	0.00209757	-0.0131642	0.0549796	0.0825382
Gm26724	290	0.000439523	0.00212758	0.0312644	0.038762	0.0323491
Fbxo30	443	0.000441675	0.00213531	-0.0219341	0.0434578	0.00668258
Fosl2	444	0.00044565	0.00215184	-0.0642133	0.063965	0.0559348
Ero1l	445	0.000446798	0.00215468	0.00587473	0.0945888	-0.137063
Specc1	446	0.000449668	0.00216582	-0.00808752	0.0456059	-0.0201145
Med15	447	0.000451384	0.00216978	-0.00277792	0.0579329	0.0309667
Cnnm2	448	0.000451615	0.00216978	-0.0186311	0.0409772	0.0389014
Lmbrd1	541	0.000458232	0.00219883	0.00883824	-0.0148638	0.0842924
Aqp2	461	0.000461342	0.002211	0.0213922	-0.0382417	0.0448383
Map2k3os	544	0.000469731	0.00224842	-0.0119569	0.0214573	0.0277733
Tanc1	546	0.000493774	0.00236057	-0.0441123	0.0795344	0.177068
Slc31a2	547	0.000495125	0.0023641	-0.168595	-0.556362	0.159699
Pex11a	221	0.000499967	0.00238427	0.0512884	-0.0116372	0.0809301
Wfdc3	549	0.000512118	0.0024392	-0.00363086	0.0162438	0.0362309
Mpzl1	550	0.000515978	0.00245456	-0.0886662	-0.0863491	0.117124
Irf1	551	0.000518003	0.00246115	-0.00363042	0.0271511	0.0847498
Scnm1	184	0.000520467	0.00246775	0.0526529	0.0181517	0.0149018
Cadm4	450	0.000520672	0.00246775	-0.0372478	0.0455014	0.0528572
Mier1	451	0.000529641	0.00250718	-0.00889386	0.0812393	0.0462139
Rusc2	452	0.00053243	0.0025173	0.00971003	0.0202357	0.0166502
Prpf4b	453	0.000539396	0.00254711	0.0362941	0.101209	-0.110164
Scin	490	0.000544163	0.00256648	-9.82209e-06	0.0255409	0.0350033
Flcn	185	0.000548318	0.00258247	0.0390526	0.0294473	0.0396228
Tspan17	554	0.000548893	0.00258247	-0.0571263	-0.0248163	0.075809
Ankrd33b	555	0.000557191	0.00261832	0.000326202	0.0229476	0.0364842
Cxcl1	455	0.000567331	0.00266273	-0.259414	0.172227	0.157269
Rassf4	456	0.000578363	0.00271121	0.0124822	0.0231631	0.0069495
Lama5	457	0.00058216	0.0027257	-0.0134576	0.0423662	-0.0269498
Parp14	559	0.000602116	0.00281571	0.000771097	0.039377	0.0512128
Cgn	561	0.000631335	0.00294521	0.0256701	0.0434399	0.0793605
Ripk1	458	0.00063085	0.00294521	-0.0100323	0.0541712	0.0342452
Sort1	562	0.000635492	0.00296103	-0.0652565	-0.0523446	0.107814
Slc6a2	563	0.000637434	0.00296649	-0.119133	-0.28907	0.122106
Nfkbie	564	0.00065929	0.00306451	-0.00152267	0.0180339	0.0210034
Dgkz	407	0.000665213	0.00308832	0.0535923	0.0685478	0.130765
Ttc36	567	0.000686423	0.00318296	0.0253353	0.0215718	0.0663463
Vgll4	464	0.000689163	0.00319182	0.00745453	0.0675015	0.082447
Fam3a	568	0.000690325	0.00319338	-0.0665037	-0.110678	0.100335
Msx2	465	0.000708477	0.00327342	-0.0139896	0.0353901	0.0336407
Gmeb1	466	0.000709337	0.00327347	0.010021	0.0386185	0.00341107
Ctnna1	467	0.000717406	0.00330675	-0.0394135	0.100779	0.0621013
Fcho2	468	0.000718673	0.00330864	0.0210291	0.0481199	0.0354701
Sh2d3c	192	0.000723472	0.00332676	0.0319055	-0.0407214	-0.0159017
5031425E22Rik	193	0.00074436	0.00341874	0.0657194	0.0557488	0.0592842
Vwa5a	570	0.000747655	0.00342979	0.00299445	0.0449746	0.0778718
Grb7	470	0.000763025	0.00349614	-0.0310289	0.0602776	0.0351115
Tmc4	572	0.000767934	0.00351446	-0.0764356	-0.00824862	0.175636
Atp6v1g2	573	0.000781363	0.00357168	0.00457454	-0.00125482	0.0284097
Snrnp48	195	0.000802857	0.00366559	0.0885016	0.0627013	-0.0147267
Ttc39a	574	0.000804133	0.00366707	-0.106776	-0.0976406	0.0973539
Xndc1	196	0.00083305	0.00379446	0.0275163	0.0112296	-0.0298503
Prrc2c	473	0.00083713	0.00380406	0.0462985	0.104063	-0.0658827
Tprgl	575	0.000836923	0.00380406	-0.130475	-0.0674363	0.137641
Neu1	577	0.000843909	0.00383035	-0.0816052	-0.0480317	0.124988
Slpi	263	0.000854411	0.00387346	0.0580737	0.0710519	0.0470979
Slc25a25	477	0.000880156	0.0039855	-0.0154554	0.0427439	0.0346727
Stk40	523	0.000890646	0.00402827	-0.119995	0.0775597	0.117942
Sytl1	580	0.00089293	0.00403387	-0.121776	-0.169143	0.116364
Map3k6	478	0.000906351	0.00408971	-0.000296883	0.0192143	0.00235071
2900060B14Rik	519	0.000909138	0.00409749	0.0148379	0.0360702	0.0460988
Ppp1r18	479	0.000915068	0.00411941	0.000887623	0.0136347	-0.00855301
Slc46a1	514	0.000920949	0.00414105	0.0265506	-0.0243809	0.0660396
Snhg12	585	0.000930875	0.00418081	0.00963675	0.00721894	0.041926
Phlpp1	200	0.000938808	0.00421154	0.0536697	0.0140269	0.041635
Akip1	201	0.000946121	0.00423941	0.0592276	0.00466197	-0.0327434
Idh1	587	0.000968965	0.00433673	0.0212577	-0.0279052	0.0867365
Kmt2a	481	0.000976467	0.0043602	0.0064857	0.0626119	0.0363117
Prdm4	480	0.000975613	0.0043602	-0.00486599	0.0252539	-0.0102624
Nabp1	482	0.000982599	0.0043825	-0.0667148	0.0568548	0.0474001
Rras	483	0.000992465	0.0044214	-0.0190901	0.0724976	0.0923755
Zfp296	203	0.000995863	0.00443142	0.0390364	0.0139707	0.0478259
Zfp622	485	0.00101231	0.00449941	0.0400138	0.0794372	0.0609785
Ptms	486	0.00102364	0.00454456	0.0375779	0.113155	-0.197368
Phf23	526	0.0010388	0.00460655	0.0219406	0.062756	0.0816531
Pfkfb3	590	0.00104062	0.00460932	0.000346177	0.0136875	0.0204948
Mlxip	591	0.00106301	0.00469772	-0.0318673	0.0237086	0.0613649
Vasp	512	0.00106278	0.00469772	-0.0972017	0.0722209	0.0975384
Ass1	592	0.00106965	0.00472166	-0.0922792	-0.0463122	0.132337
Efna5	488	0.00107625	0.00474534	-0.00980144	0.0235687	-0.00943438
Arid4b	489	0.00108071	0.00475414	-0.0233667	0.0912486	-0.0338348
Sh3bp5	593	0.00107967	0.00475414	-0.130573	-0.131004	0.11114
Slc25a36	205	0.00110503	0.00485559	0.058918	0.0473122	0.0615086
Tns2	351	0.00111808	0.00490734	0.0291703	-0.0140357	0.0407458
Sord	206	0.00112935	0.00495115	0.0486702	0.0235693	0.0283618
Zfp984	207	0.00114008	0.00499254	0.0195311	0.0126142	0.013532
Ophn1	596	0.00116388	0.00509101	0.0174757	-0.00120438	0.0697049
Eppk1	491	0.00117438	0.00513112	0.00202021	0.0309067	-0.0309016
Junos	598	0.00119191	0.00520181	0.0056151	0.00566476	0.0166567
Map1lc3a	599	0.00119843	0.00522436	-0.458699	-0.465999	0.144885
Arhgap27os2	210	0.00121135	0.00527469	0.0340907	0.0299945	0.0381972
Uhrf2	492	0.0012228	0.00531856	-0.0197503	0.0667223	-0.0256287
1700025G04Rik	600	0.00123321	0.00535779	-0.170427	0.00268039	0.0933072
Cpne8	493	0.00123757	0.0053707	-0.0495126	0.0601268	0.00031262
Ankrd22	601	0.00124661	0.00540384	-0.00683162	0.0246769	0.0427105
Ptbp2	495	0.00125617	0.00543915	-0.00175926	0.0429656	-0.00897194
Vezf1	496	0.00127153	0.0054995	0.00548668	0.0657663	0.0568805
Psip1	299	0.00127966	0.00552848	0.0519533	0.0649135	-0.239391
Ids	602	0.0012986	0.00560404	0.00747897	-0.000703187	0.0417217
Ubxn4	603	0.00130427	0.00562222	-0.162645	-0.0469468	0.158874
Prkab2	498	0.00131199	0.00564919	0.0111371	0.025888	-0.000732393
Porcn	604	0.00132341	0.00569199	0.0068407	0.000731081	0.028695
Sorl1	605	0.0013529	0.0058083	0.00547071	-0.0365011	0.107222
Sde2	500	0.00135346	0.0058083	-0.0618055	0.0760262	0.0673819
Csf3	501	0.00135743	0.00581884	-0.0717465	0.0594019	0.00248804
Gigyf1	502	0.00137255	0.00587712	0.0188477	0.0356795	-0.0124094
Gm15867	606	0.00138179	0.00591016	-0.0121655	0.0486914	0.0894053
Spint1	503	0.0014122	0.0060335	-0.156209	0.0651121	0.0340114
Fam220a	504	0.00141417	0.00603526	-0.087683	0.0763648	0.0300567
Mif4gd	608	0.00142108	0.00605805	-0.00111892	0.00371219	0.094771
Smoc1	609	0.00143683	0.00611842	-0.0236298	-0.0157513	0.0353536
Tmprss11a	610	0.00146084	0.00621379	-0.0310575	-0.0205315	0.0288323
Amd1	612	0.00148158	0.00629509	-0.00503228	0.0468801	0.0427664
Zranb2	211	0.00150604	0.00639199	0.0826031	0.0166533	-0.0780692
Fam46a	364	0.00151933	0.00643819	0.0275614	0.00122935	0.051702
Cecr2	615	0.00152027	0.00643819	-0.00544935	0.0300544	0.0425738
Tnfaip2	616	0.00152322	0.00644362	0.0153841	0.0266539	0.0263287
Rgs11	227	0.00152899	0.00646096	0.0377861	0.0308952	0.0488166
Dnmt1	506	0.00153112	0.00646285	-0.0867293	0.0555985	-0.156353
Mat2a	507	0.00154333	0.00650731	0.0257746	0.0815983	0.00222331
Tuft1	617	0.00155267	0.00653953	0.00594672	0.00945994	0.0542549
Cep170b	508	0.00156544	0.00658612	-0.00781309	0.0529076	0.0272544
Sel1l3	619	0.00158176	0.00664751	0.00490162	-0.00260352	0.0122268
Dusp5	559	0.00159452	0.00669387	0.0277283	0.0490535	0.0641172
Phf3	509	0.00164045	0.00687919	-0.00723207	0.0709374	0.0364005
Zfp521	557	0.00164452	0.00688875	0.0149597	0.0113561	0.0215515
Rb1	510	0.00164771	0.00689466	0.00883759	0.0477156	0.0245311
Zc3hav1	511	0.00165519	0.00691845	-0.0601949	0.0535028	0.00644364
Tbcc	513	0.00169183	0.00706394	-0.183498	0.0711701	0.0398803
Eps8l1	622	0.00170068	0.00709323	0.0101011	0.0212092	0.0386737
Gm26698	455	0.00171197	0.00713259	0.0147076	0.0225862	0.00586813
Tollip	214	0.00172344	0.00717263	0.0556084	0.0396528	0.0294872
Nisch	516	0.00173334	0.00720607	0.0127292	0.0894629	0.0112413
Snx21	215	0.00175743	0.00729694	0.0728207	0.0555428	0.0238646
Tns3	623	0.00175898	0.00729694	0.0167046	0.00131384	0.0832749
1110035H17Rik	220	0.00177272	0.00734603	0.0205883	0.0201978	0.0167586
Donson	238	0.00185508	0.007675	0.0235012	0.025205	-0.0317005
Ppp1r10	520	0.00185609	0.007675	-0.00283603	0.0521554	0.0353701
Slc22a4	627	0.00186257	0.00769355	-0.0329772	0.0111501	0.0607461
Ccni	521	0.00187227	0.00772536	0.00152644	0.0961937	-0.00491028
Slc39a14	628	0.00187435	0.00772567	-0.06037	0.0552655	0.105589
Phtf2	629	0.00187705	0.00772854	-0.00839423	0.00501635	0.0252653
Gnao1	630	0.00190501	0.0078353	-0.00772638	0.00333883	0.0279109
Igf2bp3	632	0.00191979	0.00787378	0.00900087	0.0100933	0.025634
Itgb6	621	0.00192048	0.00787378	0.00342192	0.0276483	0.0412808
Tmem123	631	0.00191877	0.00787378	-0.124467	-0.106605	0.116549
Mr1	635	0.00198695	0.00813764	-0.00629165	-0.0268658	0.0701282
Rasa2	524	0.00201323	0.00823653	0.00821023	0.0359014	0.0319715
Rnf167	637	0.00204477	0.0083567	0.0203145	-0.0193651	0.140058
Ppp1r15b	639	0.00209919	0.00857001	0.0083678	-0.00513673	0.077817
Ncdn	640	0.00210678	0.00859191	-0.0416446	-0.0144576	0.0501945
Desi1	525	0.00213762	0.00870849	-0.213595	0.0818798	0.0158016
Mpp5	527	0.00216443	0.00880841	-0.0316413	0.0580957	0.0513994
Slc8b1	418	0.00220682	0.00897146	0.0332107	0.0221379	0.0612193
Otud1	530	0.00222275	0.00902672	0.0160973	0.0291724	0.0257476
Gon7	217	0.00222677	0.00903351	0.0390161	0.0031089	-0.0427741
Znfx1	551	0.00223236	0.00904669	0.014667	0.0282308	0.0358023
Mylip	262	0.00223861	0.009053	0.0510977	0.0560347	0.0621488
Prpf39	531	0.0022377	0.009053	-0.0351809	0.0506398	-0.0125326
Lmntd2	584	0.00224348	0.0090632	0.00833893	0.00715702	0.0167683
Kansl1l	218	0.00225879	0.00911548	0.0376664	0.0273809	0.02009
Tle1	646	0.00227014	0.00915173	-0.0783535	0.0326734	0.0988865
Extl1	647	0.00227264	0.00915222	-0.0600542	-0.0381929	0.0545298
Zfp280d	533	0.0022781	0.00916464	0.0274983	0.0504387	0.0289068
Bach1	534	0.00229288	0.00921451	-0.0418516	0.0322882	-0.0145599
Cpsf4l	648	0.00231713	0.00930228	0.00683515	-0.00860951	0.0395943
Gna15	649	0.00232304	0.00931632	0.00510752	-0.0122903	0.0351315
Steap4	535	0.0024026	0.00962538	0.00132053	0.0205017	0.00659713
Anxa3	536	0.0025234	0.0100988	-0.0751384	0.0362786	-0.11198
Hsbp1l1	654	0.00253877	0.0101498	-0.040745	-0.165843	0.0931518
Ace	655	0.00254962	0.0101826	0.00985993	0.0215683	0.0503606
Trafd1	537	0.00256228	0.0102226	-0.0408971	0.0520121	0.0230203
Arhgef12	538	0.00258293	0.0102944	0.00135367	0.0748123	0.0718871
Rbms1	541	0.00271508	0.0108099	-0.130012	0.0749004	-0.0586852
Gm13056	656	0.00272531	0.0108394	-0.103477	-0.0985533	0.0628079
Dusp8	521	0.00274424	0.0109035	0.0296562	0.0495659	0.0503148
Mcl1	543	0.00274843	0.0109089	-0.184846	0.0842073	0.0602511
Cpq	657	0.0027703	0.0109844	-0.147665	-0.173476	0.0996594
Rnf31	658	0.00281073	0.0111333	0.0164922	0.0202816	0.0421453
Ripk4	660	0.00282099	0.0111625	-0.0507258	0.0166771	0.0575197
Gse1	661	0.00285729	0.0112945	-0.00446545	0.00269907	0.0420922
Cept1	662	0.00286052	0.0112957	-0.0186577	-0.0272751	0.0925194
Lemd3	663	0.00290682	0.0114668	-0.0057592	0.0160292	0.027598
Acaa1b	664	0.00292263	0.0115174	0.0126966	0.011976	0.0433185
Cntfr	225	0.00293685	0.0115524	0.0156682	0.00839348	0.00918665
2810454H06Rik	226	0.00293751	0.0115524	0.0148798	0.00772079	5.63439e-05
Ccnt2	553	0.00294591	0.0115736	0.00950796	0.0629347	0.0728761
Sirt1	432	0.00299814	0.011758	0.0175546	0.0237018	0.0253595
Zc3h7a	600	0.003002	0.011758	-0.0299782	0.0572316	0.0751469
Creb5	546	0.00300502	0.011758	-0.128113	0.0675804	-0.0532984
Eif4g2	545	0.00300301	0.011758	-0.132135	0.103889	-0.00584425
Rasl10a	547	0.00303684	0.0118704	-0.0249005	0.015061	-0.0121598
Trim16	548	0.0030561	0.0119336	-0.0244937	0.0272898	-0.00588452
Ythdf2	549	0.00306327	0.0119495	-0.0232181	0.0633946	0.0659921
Ptger4	666	0.00306859	0.0119582	-0.0171937	0.00148124	0.0109314
Map3k8	550	0.00307336	0.0119647	-0.061682	0.0610266	0.0592311
Irf7	667	0.00308261	0.0119886	-0.0203465	-0.0194114	0.0812386
1600020E01Rik	229	0.00309739	0.012034	0.0390256	0.0138873	-0.0198111
AC149090.1	230	0.00310243	0.0120414	0.0652404	0.00850863	-0.0102265
Taok3	668	0.00311381	0.0120613	0.011563	-0.00474242	0.0422789
Desi2	552	0.0031117	0.0120613	-0.0788695	0.0757744	-0.0129971
Tmem140	669	0.00314141	0.012156	0.00359	-0.0131657	0.0355025
Cpd	670	0.00315676	0.0122032	-0.220158	-0.255498	0.184425
AC139671.1	671	0.00316295	0.0122149	0.00445315	-0.000783884	0.0183634
Ubash3b	555	0.00317765	0.0122471	-0.0163483	0.0191208	0.0218167
Lgals3bp	672	0.00317527	0.0122471	-0.267666	-0.258635	0.0639947
Egln3	673	0.00321481	0.012378	-0.0222475	-0.228499	0.148435
Ier3	641	0.00322472	0.0124038	-0.482425	0.160744	0.310966
Nhs	675	0.00325441	0.012504	0.00214764	0.00649844	0.0186379
Kdm5b	556	0.00325726	0.012504	-0.112317	0.0740862	0.0968289
4931428F04Rik	258	0.00327172	0.012547	0.0242559	0.0249431	-0.0181078
Trp53bp2	557	0.00328853	0.012599	-0.0748733	0.0445638	0.00933246
Ifi47	678	0.003302	0.012638	-0.0701462	0.000219564	0.0459166
Anxa7	672	0.00333519	0.0127524	-0.128154	0.0808334	0.144044
Dennd4a	558	0.0033623	0.0128433	-0.0126233	0.0391847	0.0262784
Ppfibp2	234	0.00338494	0.012917	0.0692114	-0.176454	0.022087
Rab4a	680	0.00339354	0.012937	-0.0765924	-0.328973	0.0996105
Ftl1-ps1	560	0.0034662	0.013201	0.00376421	0.0812267	0.0884856
Ppl	681	0.0034797	0.0132393	0.000974186	0.0315817	0.0383838
D230017M19Rik	682	0.00348473	0.0132454	-0.00409692	-0.000636351	0.0111902
Zmym5	561	0.00349608	0.0132755	-0.0170423	0.0604859	0.0768003
A530020G20Rik	366	0.00351779	0.0133317	0.0265923	-0.0074351	0.0415509
Endod1	562	0.00351578	0.0133317	0.0160776	0.0357725	0.0138873
Rilpl1	235	0.00352271	0.0133372	0.0358596	0.0252937	0.0367602
Rnf111	684	0.00354122	0.0133942	0.0104637	0.0379703	0.0619396
Ccdc17	685	0.00357409	0.0135052	-0.00333402	-0.00645398	0.017167
Nsmaf	686	0.00359791	0.0135802	0.0110183	0.00351126	0.0286039
2310001H17Rik	687	0.00360496	0.0135802	0.00943673	-0.0100126	0.0614902
Sowahc	565	0.003608	0.0135802	-0.0194485	0.0288371	0.0225458
Marcksl1	564	0.0036041	0.0135802	-0.71919	0.133204	0.0527638
Krt23	236	0.0036455	0.0137061	0.053903	-0.0197596	0.0199394
Akirin2	566	0.00364856	0.0137061	-0.0654935	0.0713069	0.0748444
Dll1	237	0.00368098	0.0138144	0.0174347	0.00616592	0.0126528
Nectin1	601	0.00374927	0.0140507	-0.00654577	0.0260601	0.0299499
Slc48a1	689	0.00375121	0.0140507	-0.0131352	-0.0149973	0.101549
Creb3l4	240	0.00376897	0.0141035	0.0228167	0.00418218	-0.0175332
Bloc1s1	690	0.00379455	0.0141854	-0.102961	-0.0799641	0.0827337
Tpm4	568	0.00389394	0.0145429	-0.119039	0.0747376	-0.275285
2900093K20Rik	267	0.0039053	0.0145712	0.0516411	0.0135028	0.0694034
Erbin	569	0.00395886	0.0147568	-0.070168	0.0697674	0.0858895
Itgb5	694	0.00397961	0.0148198	-0.355538	-0.345606	0.114846
Large1	570	0.00400696	0.0149073	0.0120692	0.0207515	0.016744
Tapbp	695	0.00401691	0.0149299	-0.146674	-0.0599989	0.110699
Mmgt2	696	0.0040329	0.0149749	0.00754165	-0.0544284	0.0704629
Azin1	571	0.00407721	0.0151249	-0.113144	0.0553952	-0.000805801
Cdcp1	572	0.00409105	0.0151616	-0.0852935	0.0548081	-0.0230944
Timp1	573	0.00413476	0.0153089	0.00973168	0.0272912	0.0221241
Slc39a1	271	0.00429701	0.0158944	0.0911254	0.0802681	0.0238667
Syt11	575	0.00442317	0.0163454	0.00848951	0.0171336	-0.00243493
Ikzf2	469	0.00444112	0.016396	0.0245786	0.0261978	0.0394482
Marveld2	578	0.00453436	0.0167243	-0.133642	0.054342	-0.00435842
Hdac7	700	0.00456093	0.0168062	-0.0121	0.00539765	0.0177235
Pnn	304	0.00460562	0.0169547	0.0728115	0.0815973	-0.0481374
Lst1	701	0.00462462	0.0170084	1.53309e-05	-0.000510493	0.0195144
Txndc16	605	0.00465513	0.0171043	0.0284448	0.0165914	0.0637498
Vill	703	0.00466639	0.0171293	0.016256	0.0251453	0.0483449
Gna13	580	0.00470444	0.0172526	-0.0169397	0.0634122	0.0362031
Suv39h2	581	0.00471801	0.0172859	-0.0201002	0.0235135	-0.0436324
Tbkbp1	402	0.0047236	0.01729	0.0162441	0.0227182	0.0125068
Rictor	583	0.0047458	0.0173548	-0.00272281	0.0492421	0.0275375
Manba	584	0.0047984	0.0175305	-0.00652801	0.0208679	0.00403325
Lima1	345	0.00480765	0.0175477	0.0574609	0.067091	-0.00620787
Osgin1	708	0.00484406	0.0176639	-0.00324155	0.0129476	0.0657534
Zfp644	587	0.00485179	0.0176753	0.0292154	0.06001	-0.0208282
2810403A07Rik	588	0.00498709	0.0181511	0.00611236	0.0469237	-0.0101531
Tjp2	589	0.00500632	0.0182039	-0.140549	0.0462935	0.00983626
Ppp1r3c	474	0.00507096	0.0184216	0.0157416	0.000576878	0.0286357
Pdlim2	329	0.00512385	0.0185962	0.0215147	0.0222815	0.0296238
Golgb1	712	0.00517684	0.0187709	-0.0807695	-0.0416591	0.122533
Cfap43	368	0.0052198	0.0189089	0.016111	0.0196992	0.0121826
Safb	295	0.00523025	0.018929	0.0504175	0.0539196	-0.0225263
Cfb	714	0.00539421	0.0195041	-0.00623916	0.0147854	0.0163474
Tmem65	595	0.00543894	0.0196474	-0.0155777	0.0419903	0.0106548
Prkx	596	0.0054781	0.0197703	-0.00157871	0.0288818	0.00564912
Baz2b	597	0.00548593	0.0197703	-0.0342556	0.077716	-0.0422546
AA986860	717	0.00548833	0.0197703	-0.085826	-0.00528447	0.0337118
Gclc	429	0.00550521	0.0198126	0.020043	0.0296862	0.018976
Pja2	718	0.00552658	0.019871	0.00188804	0.000767459	0.0785344
Aff4	719	0.0055615	0.0199779	-0.0356472	0.0216955	0.110656
Prkci	599	0.00558168	0.0200317	-0.0419455	0.0414914	0.0101618
Gpbp1l1	720	0.00560204	0.0200861	-0.00766386	0.0138347	0.0755185
Il15ra	249	0.00567042	0.0203124	0.0447854	-0.0706362	0.028161
Lrrc75b	721	0.00567651	0.0203154	0.000467606	-0.0286739	0.032261
Plekhg5	323	0.00571566	0.0204365	0.0170868	0.00923146	0.0241857
Tlcd1	250	0.00574117	0.0204898	0.0515169	-0.0327454	-0.015761
Uhrf1bp1l	602	0.00574112	0.0204898	-0.00519824	0.0371981	0.0151707
Pgf	251	0.00575264	0.0205117	0.0325885	0.028342	0.0123743
C2cd4d	252	0.00579565	0.020646	0.0154475	-0.00983023	-0.00550733
Celsr2	603	0.00582427	0.0207288	-0.0368174	0.0690137	0.0627126
E130102H24Rik	686	0.00584846	0.0207957	-0.00788593	0.0339299	0.0533881
Smtn	690	0.00589268	0.0209337	0.0123727	0.0421776	0.0490631
Acot13	725	0.00590862	0.020971	0.0298527	-0.0446742	0.123626
Rbm5	726	0.00593043	0.0210064	0.0185096	0.022801	0.0946399
Vat1	727	0.00593494	0.0210064	-0.0735132	-0.0537855	0.0925757
Chic2	605	0.00592502	0.0210064	-0.34739	0.0907748	-0.183977
Epb41l2	607	0.00595078	0.0210239	0.00896334	0.0236609	-0.0334467
Pkn2	606	0.00595062	0.0210239	0.00511369	0.07834	-0.0807529
Mapk3	729	0.0060194	0.0212469	0.0234928	-0.0136017	0.113905
Tmed3	731	0.00617033	0.0217597	-0.59909	-0.677115	0.122254
Fam181b	255	0.00627163	0.0220766	0.0220565	-0.0190313	-0.00062303
Ubald1	732	0.00627134	0.0220766	-0.0138325	0.0398465	0.0830488
Pdgfc	540	0.00628257	0.0220949	0.0241209	0.0354882	0.0196768
Gen1	256	0.00631485	0.0221882	0.0123336	0.00484016	-0.050102
Egfr	733	0.0063363	0.0222434	0.015836	0.0229765	0.0601854
Aplp2	734	0.00636546	0.0223254	-0.0581013	0.0335965	0.154476
Hmces	506	0.00641181	0.0224675	0.023627	0.0358658	-0.065955
Nrtn	735	0.0064228	0.0224856	0.00399216	-0.0146021	0.115498
Pdk2	257	0.00645744	0.0225864	0.0613275	-0.0439986	0.0660998
Aaed1	736	0.00652482	0.0227629	0.0120819	0.0333924	0.0947151
Pip5k1a	613	0.0065256	0.0227629	-0.0189063	0.0503243	0.0138155
Tubb2b	612	0.00652196	0.0227629	-0.156953	0.0357038	-0.154669
Cd200	737	0.00656716	0.0228872	-0.260197	-0.0131978	0.135934
Pcdhb4	738	0.00658511	0.022929	0.00516347	0.0023001	0.0182008
Ulk3	497	0.00664301	0.0231098	0.0161577	0.00183718	0.0280011
Tra2a	614	0.00666853	0.0231776	-0.0251127	0.0813402	0.0621791
Zmiz1	741	0.00673848	0.0233997	0.0240337	-0.0517949	0.0931891
Herc6	617	0.00675671	0.0234419	0.00813213	0.0296483	0.0174032
Hmgb2	260	0.00688459	0.0238115	0.0673517	0.0634671	-1.01787
Tnrc6b	406	0.00687163	0.0238115	0.0433575	0.0556227	0.0430014
4732440D04Rik	348	0.00688808	0.0238115	0.0171184	0.0200376	0.00336858
Yjefn3	650	0.0068941	0.0238115	0.0103034	0.000194122	0.0212289
Saa1	673	0.00688004	0.0238115	-0.0443837	0.0285286	0.029426
Tfe3	705	0.00690892	0.0238413	-0.0244432	0.0384409	0.0354367
Cnst	744	0.00693716	0.0239174	0.00426181	-0.00137775	0.0170264
Btg3	344	0.00698149	0.0240487	0.0173121	0.020389	0.0194036
Ktn1	365	0.00699484	0.0240732	0.0604923	0.0738537	0.0447823
S100a6	625	0.00701126	0.0241083	-0.139781	0.0755538	-0.0935883
Ppp1r13l	665	0.0072922	0.0250519	0.0121614	0.0378279	0.0485986
Bend7	628	0.0073087	0.0250863	0.00296404	0.0217067	0.0127963
Gm26699	504	0.00732577	0.0251002	0.0214507	0.0284518	0.00660215
Fbln2	746	0.00732164	0.0251002	-0.0501662	0.0353437	0.0650077
Cwf19l2	306	0.00734934	0.0251586	0.0509689	0.0437319	0.074537
Phf21a	747	0.0073565	0.0251608	0.00590088	0.000327352	0.0509062
Rilpl2	264	0.00739105	0.0252566	0.0646301	-0.0675571	0.0401804
Adck5	266	0.00740754	0.0252848	0.0551657	-0.0886405	0.051351
Trps1	748	0.00741241	0.0252848	0.0482193	0.0545163	0.188384
Myc	749	0.00741926	0.0252858	-0.0122561	0.0295732	0.0787482
Ubp1	751	0.00751196	0.0255791	0.0119481	0.0166087	0.051868
Nectin4	630	0.00754128	0.0256563	-0.0569214	0.0614605	0.0594224
Hyal1	431	0.00759183	0.0258055	0.0286642	0.0368237	0.0333829
Tnfsf9	633	0.00760356	0.0258227	0.00689264	0.0184427	0.000908295
Mbd1	667	0.00761262	0.0258307	0.0179888	0.0522716	0.0608481
Echdc3	596	0.00762914	0.025864	0.0363028	0.0257975	0.0908778
Garnl3	401	0.00767597	0.0259999	0.0112735	0.0145506	0.0119415
Ulk1	740	0.00768966	0.0260234	-0.0107219	0.0465403	0.0755574
Lnpep	636	0.00774027	0.0261519	0.0183533	0.0339622	0.0427444
Arhgef40	637	0.00774117	0.0261519	-0.0100349	0.0260299	-0.00665528
Cish	755	0.00785695	0.0265198	-0.147872	0.0181943	0.0814259
Prelid2	268	0.00795436	0.0267919	0.043077	0.00276564	0.0131114
Zbtb2	638	0.0079503	0.0267919	-0.00456854	0.0271031	0.0247417
Sltm	639	0.00795841	0.0267919	-0.117713	0.0740327	0.0539752
Nicn1	270	0.00803233	0.0270172	0.0381771	0.00770095	0.00709011
Adssl1	642	0.00812393	0.0273015	0.0175938	0.0479599	0.0410144
Tle2	758	0.00816997	0.0274323	-0.00344685	-0.0111868	0.0557842
Ndst1	759	0.00822176	0.0275822	-0.0564314	0.0296372	0.0686254
Sybu	760	0.00827505	0.0277369	0.00431196	0.00853502	0.0121552
Pnpla7	274	0.00829572	0.0277579	0.0275213	0.0145666	-0.0143458
Ippk	761	0.00829513	0.0277579	0.00166241	0.0119713	0.0408407
2700097O09Rik	275	0.00833468	0.0278641	0.0394725	0.0256977	0.00446436
Fam234b	276	0.00836513	0.027938	0.0405764	0.00745107	0.032465
Ccdc9	643	0.00837126	0.027938	0.00584543	0.0445489	0.0254276
Sgk1	763	0.00841025	0.0280439	-0.0166516	0.0328361	0.112694
Aen	646	0.00842757	0.0280773	0.00056357	0.0400733	-0.0208378
Klhl21	647	0.00845378	0.0281404	0.0105547	0.0411356	0.04611
Hnrnph3	278	0.00858506	0.0285527	0.0532827	0.0450051	-0.0833748
C730034F03Rik	279	0.00864705	0.0287309	0.0168187	0.00384496	0.00343911
Gm10399	280	0.00865352	0.0287309	0.0137275	0.0091821	0.00339478
Sox4	651	0.00877387	0.0291054	-0.844526	0.128011	-0.457239
Abca5	766	0.00883642	0.0292877	0.00410196	0.0104282	0.0293537
Ccdc82	369	0.0088825	0.02939	0.0248511	0.0294001	0.0223287
Ppm1k	281	0.00887651	0.02939	0.0228288	0.00756846	0.00398677
Itgb8	654	0.00898209	0.029694	0.00628728	0.0246735	0.00368832
Tor1aip1	768	0.00901247	0.0297689	0.00948383	0.0514858	0.0777455
Lipa	769	0.00911126	0.0300695	-0.0147513	-0.0216828	0.0398877
Slc43a2	771	0.00920696	0.0303593	-0.0285952	-0.0474669	0.0450964
Ociad2	772	0.00939659	0.0309582	0.0205733	-0.131366	0.125316
Osbpl5	773	0.00940735	0.0309672	-0.00363949	-0.013606	0.0305644
Foxp1	395	0.00951724	0.0312784	0.0449447	0.0547287	0.0629309
Ap3m2	774	0.00951811	0.0312784	0.00109315	-0.00886973	0.0250084
Flot1	775	0.00954003	0.0313238	-0.0543802	-0.0134293	0.0998769
Gnl1	658	0.00977657	0.0320731	-0.0209287	0.0532532	-0.0227404
Nipal3	777	0.00981337	0.0321665	-0.00291826	-0.036165	0.0456428
Gm26917	516	0.00985464	0.0322744	0.0530696	0.0719957	0.0723684
Per2	662	0.00991157	0.0324333	-0.00384146	0.015784	0.0143906
Cmc4	283	0.00995802	0.0325323	0.0352183	0.0203641	0.026966
Kmt5b	778	0.0099587	0.0325323	0.0183956	-0.00201278	0.0612876
Dnase2a	284	0.00998556	0.0325782	0.0619327	-0.0552093	0.0428718
Rasd1	285	0.00998965	0.0325782	0.0291418	0.0248798	0.0202914
Prr5l	663	0.0100208	0.0326524	-0.00932692	0.0184173	0.0140196
Pex6	664	0.0101204	0.032949	0.00487448	0.0420729	0.0311465
Gsto1	286	0.0101682	0.0330767	0.0563016	0.0206686	0.0546952
Glb1	779	0.0101777	0.0330798	-0.310886	-0.297118	0.099858
Slc4a4	287	0.0102123	0.0331362	0.0114385	0.00780425	0.00513901
Zfp36l2	692	0.010209	0.0331362	-0.0992551	0.0647933	0.0714263
Upf2	292	0.0102716	0.0333008	0.0453303	0.0416742	-0.0417189
Ifih1	780	0.0103234	0.0334405	-0.0415828	0.00417685	0.0499134
Ssbp2	442	0.0103362	0.033454	0.0162912	0.0213886	0.00175332
Tfcp2l1	527	0.0103733	0.0335178	0.0188104	0.00738361	0.0356773
Prss12	668	0.010373	0.0335178	-0.00339579	0.0166389	-0.138497
Spaca6	669	0.0103985	0.0335709	-0.0148961	0.0365765	0.00356189
Fnbp4	517	0.0104441	0.0336899	0.0248843	0.0349377	-0.0110963
Dcaf12	782	0.010476	0.0337646	-0.00845987	0.0227423	0.0566754
Pot1a	288	0.0105341	0.0338954	0.0273694	-0.00685019	-0.00787188
Adamts8	671	0.0105331	0.0338954	-0.0346612	0.0193281	0.00567624
Muc1	696	0.0105973	0.0340704	-0.00783299	0.0228518	0.0246599
Mdm4	374	0.0106197	0.034114	0.0440619	0.0501401	0.0216179
Gabbr1	784	0.0106316	0.0341236	0.00643658	0.0230151	0.0411111
Guca1a	785	0.0106537	0.0341662	-0.058065	-0.0755439	0.0709957
9930021J03Rik	677	0.0108682	0.0348252	0.0134348	0.0322085	-0.0125026
Fam71e1	786	0.0108874	0.0348577	0.00433912	0.00771832	0.0188913
B4galt1	787	0.0109116	0.0349062	-0.080026	-0.0368811	0.0980195
Trim68	338	0.0109783	0.0350325	0.0356633	0.0135479	0.0464518
Whamm	362	0.0109735	0.0350325	0.0326943	0.0261007	0.0481218
Ankrd11	679	0.0109715	0.0350325	-0.0287273	0.0757551	-0.0142815
Sf3b1	680	0.0111525	0.0355591	-0.0999113	0.0888669	-0.00337069
Dnm3	792	0.0114248	0.0363972	0.00400112	0.00500773	0.0158624
Pcsk1n	793	0.0114526	0.0364555	0.0062861	-0.00359298	0.0167295
Tgfbr1	685	0.0114905	0.0365461	-0.023066	0.0369485	0.041837
Klhdc8b	308	0.0115528	0.0367139	0.0222919	0.0145392	0.0230856
1810044D09Rik	794	0.0115703	0.0367392	0.0052461	0.00489353	0.0483479
Ankhd1	795	0.0116029	0.0368124	-0.00761067	0.0199259	0.067892
Pyroxd2	632	0.0116457	0.0369179	0.0113711	0.0126522	0.0235395
Cbx3	291	0.0116861	0.0369853	0.0819063	0.0108129	-0.300616
Isoc1	797	0.0116801	0.0369853	-0.0965006	-0.0601973	0.0724557
Osbpl3	687	0.0117277	0.0370865	0.00133624	0.0257967	0.0124085
Wsb2	691	0.0118505	0.037444	-0.0384865	0.0543805	-0.0261074
Gsto2	798	0.0119377	0.0376888	0.00741753	-0.00431982	0.0196799
Prss8	799	0.0119871	0.0378137	-0.123605	-0.0632233	0.0844713
Pvr	693	0.0120121	0.0378616	-0.0433875	0.0298294	-0.0287636
Spry2	294	0.0121134	0.0381186	0.0691634	0.046203	-0.0543418
A330041J22Rik	801	0.0121076	0.0381186	-2.74962e-05	0.00215115	0.0270923
Tox3	296	0.0122342	0.0384673	0.0178514	0.00726598	-0.0179603
Gm47533	802	0.0123408	0.0387711	-0.00432316	0.0154052	0.0135562
Asap1	695	0.0124933	0.0392181	0.010622	0.0234832	0.0101491
Tgfbr3	396	0.0125819	0.0394643	0.0202161	0.0234915	0.0211832
Tsc22d3	546	0.0127642	0.0400035	0.0327007	-0.0833623	0.0586193
Rtn4	698	0.0128854	0.0403505	-0.273712	0.0845891	0.0923398
Pgm2	297	0.0129228	0.0404348	0.0437091	0.0238139	0.042604
Serpinb5	806	0.0129702	0.0405504	-0.234647	-0.0179625	0.0757303
Tardbp	699	0.013132	0.0410228	-0.0359351	0.0600771	-0.124131
C1qtnf4	350	0.0131731	0.0411179	0.037041	0.0410125	-0.0010661
Vasn	701	0.0133293	0.0415719	-0.0259837	0.0341161	0.027283
Igfals	807	0.0133616	0.0416391	-0.571234	-0.75275	0.0678091
Farp2	808	0.0134519	0.0418864	0.00779828	0.0132944	0.0204208
Map1b	703	0.0134842	0.0419533	-0.0454683	0.0346414	0.0207578
Pdgfa	704	0.0135824	0.0422248	0.0111501	0.0302539	0.0130736
Oplah	574	0.0138534	0.0430324	0.0204903	0.021786	0.0425262
Ppfibp1	707	0.0140164	0.0435038	-0.00446255	0.0313822	0.00614267
Rnf43	300	0.0140477	0.043566	0.027304	-0.0390227	-0.0493911
Ptpru	301	0.0140796	0.0436126	0.0170826	0.00610471	0.00575219
Gm10638	814	0.0140854	0.0436126	0.00435565	-0.00284885	0.0147863
Zscan26	302	0.0141253	0.0437013	0.035577	0.0152846	0.0117235
St6galnac6	815	0.0141818	0.0438408	-0.0575173	-0.1661	0.113128
3010003L21Rik	708	0.0142503	0.0440173	0.00809018	0.0226718	-0.000831382
Arhgap6	303	0.0143177	0.0441901	0.0152352	0.00972828	0.00159271
Pld2	391	0.0144042	0.0444216	0.0193573	0.0193857	0.0263668
Cdk12	713	0.0144887	0.0445608	0.0135861	0.052075	-0.0163685
Rnf2	711	0.0144638	0.0445608	0.0028678	0.0346469	0.036305
Pik3c2a	712	0.0144851	0.0445608	-0.0169446	0.0502545	0.049865
Fam110c	714	0.0144955	0.0445608	-0.078489	0.042336	-0.0270411
Gm11205	816	0.0145513	0.0446967	0.00155927	0.00293428	0.0187894
Nek7	817	0.0145802	0.0447497	-0.0998919	-0.00682553	0.0555331
Ddx17	715	0.0145942	0.044757	-0.0188796	0.0649711	0.0598659
Gm17619	819	0.0146158	0.0447877	-0.0322753	-0.0565722	0.0580413
Trim45	305	0.0146741	0.0449307	0.015871	0.00157637	-0.00517323
Kdm3b	457	0.0148223	0.0453124	0.0257311	0.0322251	0.0295005
Gm10642	820	0.014813	0.0453124	-0.00409851	-0.0158852	0.017988
Pigp	822	0.015194	0.046412	-0.167817	-0.238414	0.108945
Sesn2	720	0.0152324	0.0464925	0.0181259	0.0271539	0.0313863
2310022B05Rik	717	0.0154624	0.0471573	0.012688	0.0324437	0.0275863
Gdpd1	826	0.0154934	0.0472145	-0.233352	-0.130615	0.0659507
Mau2	718	0.015676	0.0477334	0.0257323	0.0496122	0.0595837
Rab24	373	0.0157022	0.0477753	0.0575573	-0.0303811	0.090367
Ube2b	720	0.0157744	0.0479572	-0.112145	0.0839143	0.0889464
Eloa	828	0.0158313	0.0480923	0.0138545	-0.00557158	0.0480793
Kctd14	312	0.0158812	0.048206	0.0307716	-0.113906	-0.0404103
Kctd1	830	0.0159374	0.0483384	-0.452384	-0.0968594	0.116262
Mob3c	543	0.0160415	0.0486158	0.0245991	0.0297726	0.0385008
Tsc22d4	313	0.0162888	0.0493266	0.0496695	0.0301235	0.014874
Cdk11b	722	0.0166104	0.0502612	0.00487877	0.0550558	0.0151237
Pik3c2b	315	0.0167112	0.0505265	0.0379987	-0.0591121	0.0311513
Ino80	723	0.016728	0.0505378	0.00251523	0.0327085	0.0079149
Bcl2l1	724	0.0167837	0.0506661	0.015364	0.0479267	0.0610238
Nfat5	725	0.016837	0.0507479	0.00341386	0.0503364	0.0365221
Gtpbp4	726	0.016837	0.0507479	-0.0646439	0.0637097	-0.0933116
Gpt	317	0.0170915	0.0514747	0.0252802	0.00624614	-0.0921549
Nme5	834	0.0171872	0.0517225	0.0145065	0.019399	0.0412048
Ifit1	835	0.0172255	0.0517973	-0.00901484	0.00428698	0.0295253
Naaladl2	836	0.0173153	0.0520269	0.00345591	-0.011526	0.0314132
Pfkfb2	838	0.0173975	0.0522331	-0.00146964	0.000264797	0.0135872
Il4ra	830	0.0175741	0.0527223	0.0117372	0.023941	0.0339242
Zfp281	731	0.0176979	0.0530525	-0.0487399	0.0301168	0.0341578
AI463170	841	0.0177528	0.0531756	-0.00501565	-0.0107017	0.0508164
Selenbp1	507	0.0178423	0.0534025	0.0377264	0.0515747	0.0468019
Pdzd2	842	0.0178673	0.0534356	-0.00256826	0.0123027	0.0653133
Tbc1d31	320	0.017912	0.053528	0.0133429	0.00797911	-0.0338511
Atf7	322	0.0179873	0.0537114	0.0449071	0.0276461	0.0428288
Gm46218	733	0.0182677	0.0544854	0.00865982	0.018002	0.0147338
Smad7	735	0.0182964	0.0544854	-0.0206201	0.0422715	0.00844574
Tuba1c	734	0.0182866	0.0544854	-0.348592	0.10467	-0.225849
Cldn3	843	0.018303	0.0544854	-0.365153	0.0284435	0.141939
Mitf	844	0.0183526	0.0545749	0.00420079	0.00173613	0.0177548
Ern1	736	0.0183614	0.0545749	-0.00235465	0.0173123	0.017403
Nfkbil1	325	0.0184115	0.0545975	0.0494704	-0.014444	-0.0229718
Pdlim4	737	0.0183986	0.0545975	-0.0355894	0.0202353	-0.215351
Fam110a	738	0.0184085	0.0545975	-0.0719696	0.0418567	-0.0912876
Btbd10	739	0.0184262	0.0545993	-0.0079786	0.0333127	-0.00781054
Rab20	746	0.018491	0.0547492	-0.0291034	0.0540548	0.061622
Pip4k2c	845	0.0185591	0.0549088	-0.0105574	0.0385544	0.0816947
Hist3h2a	326	0.0186609	0.0551676	0.0587138	-0.0871089	-0.0463066
Snx10	847	0.0187101	0.0552707	-0.0660073	0.0310592	0.0602517
Vsig10	741	0.0188286	0.0555781	-0.00137058	0.0325078	-0.0460527
Wdr44	848	0.0188615	0.0556329	-0.0362747	0.0248436	0.0381967
Hivep1	743	0.0189492	0.0558488	-0.0203644	0.0225654	0.00719751
Ctsa	850	0.0192436	0.0566732	-0.0209255	-0.0472888	0.113386
Cspp1	747	0.0192647	0.056692	-0.0186757	0.0361936	-0.0310384
Plekhf2	831	0.0193865	0.0570042	0.00774529	0.0345714	0.0357998
Gstt3	852	0.0194003	0.0570042	-0.116682	-0.241459	0.0946658
Rab34	327	0.0194199	0.0570183	0.0357502	0.0287235	-0.0129333
Nsd3	820	0.0195321	0.057304	-0.0335966	0.0546109	0.0640356
Erich2	855	0.0197108	0.0577844	-0.00586047	0.00305561	0.0168593
Sh3glb1	749	0.0198685	0.0582023	-0.222837	0.0762007	-0.0277868
Irs2	331	0.0199861	0.0585026	0.0361607	-0.10033	-0.000908165
Lpcat1	511	0.0202135	0.0591233	0.0348431	0.0477583	-0.0182226
Aldh3b2	857	0.0202309	0.0591295	-0.087321	-0.248663	0.0790439
Sptlc2	751	0.0202629	0.0591781	-0.0661831	0.0419858	-0.0198613
Xaf1	383	0.0203319	0.0592988	0.0335897	-0.00102231	0.0351931
Dctn4	858	0.0203456	0.0592988	-0.04195	0.0252408	0.066087
Csnk1e	752	0.0203503	0.0592988	-0.0435853	0.046027	-0.0594145
Tra2b	754	0.0203909	0.0593722	-0.0325475	0.0692271	-0.0668554
Gt(ROSA)26Sor	332	0.0204828	0.0595948	0.0531365	0.0473734	0.0169483
Wdr91	861	0.0205564	0.0597187	0.00101315	0.0121217	0.0171192
Dnajb5	828	0.0205541	0.0597187	-0.00913861	0.0129406	0.00924955
Irf2bp2	333	0.0207348	0.0601918	0.0276542	-0.0159106	-0.00151895
Taf1a	335	0.0208813	0.060519	0.0233317	0.00299605	-1.1407e-05
Zfp503	863	0.0208946	0.060519	0.0145345	-0.0198317	0.0700344
Pabpc4l	334	0.0208739	0.060519	0.0133808	-0.00619438	-0.0293162
Lonrf1	864	0.0209438	0.060616	0.0066332	0.0244388	0.0437309
Hif1a	757	0.0210446	0.060862	-0.0137227	0.0600661	-0.0806187
Per1	424	0.0210928	0.0609557	0.0258172	0.011	0.0367885
Nrbf2	866	0.0211394	0.0610448	-0.014533	0.00512552	0.055962
D630039A03Rik	505	0.0212129	0.0612112	0.0131885	0.000481696	0.0201872
1810030O07Rik	389	0.0212748	0.061344	0.0310853	-0.026902	0.0385982
Helz2	869	0.0213981	0.0616533	-0.00877684	0.012793	0.017478
5430416N02Rik	758	0.0215246	0.0619716	0.0112169	0.0273368	-0.0211591
Arhgef39	336	0.0217527	0.0625461	0.013167	0.00554316	-0.0687598
Mier3	652	0.0217566	0.0625461	0.0121332	0.0200681	0.00890848
Arsa	408	0.0219035	0.0629217	0.0210079	0.0216177	0.024689
Fnip1	760	0.0219839	0.0631055	-0.0168763	0.0319163	0.0195992
Ralb	872	0.0224617	0.0644292	-0.0796254	0.0321702	0.0712769
Tspan7	873	0.0225674	0.0646842	-0.0775308	-0.0838413	0.0727438
Fzd9	340	0.022667	0.0648734	0.028904	-0.11475	-0.0167876
Socs2	874	0.0226639	0.0648734	-0.265816	-0.260021	0.171216
Nab1	761	0.0226893	0.0648891	-0.0806864	0.0455319	-0.0301758
Rlf	762	0.0227373	0.0649782	0.00483386	0.0365783	0.0322612
Chst12	341	0.0228004	0.0651102	0.0216989	-0.00635457	0.0195831
Tmub2	875	0.0229553	0.065504	-0.019635	-0.0724331	0.0667823
Slc9a1	878	0.0230899	0.0658394	-0.000589761	-0.0425384	0.0389667
Tsacc	399	0.0234736	0.0668843	0.0219505	0.00900967	0.0303762
Ltk	400	0.0235672	0.0671012	0.0130565	0.0130761	-0.0068869
Elmsan1	881	0.0237455	0.0675592	0.00484936	0.00713585	0.014441
Dixdc1	519	0.0238879	0.067864	0.0227706	-0.0501389	0.0428866
Plcxd2	882	0.0238875	0.067864	-0.00346417	-0.0248731	0.0119755
Pawr	766	0.0239399	0.0679618	0.00330456	0.0229438	0.0149522
Rnf122	884	0.023977	0.0680172	-0.0503952	0.0346167	0.106117
Asb16	342	0.0241101	0.0683446	0.0127517	0.00230542	0.0111552
Ptk2b	763	0.0241999	0.0685487	0.0206305	0.0256297	0.055695
6430573F11Rik	343	0.024333	0.0688246	0.0155843	0.00163691	0.0129585
Rlim	768	0.0243266	0.0688246	-0.0533337	0.0410613	0.0256827
Kin	769	0.0243615	0.0688546	0.00706334	0.0354391	-0.0348963
Ahr	770	0.0243865	0.068875	-0.0406191	0.0320515	-0.0107479
Zfp131	771	0.0244807	0.0690905	-0.000658318	0.0395363	0.0188286
Pcdhb5	888	0.0245872	0.0693403	-0.00240064	0.00223593	0.0138439
Smim5	347	0.0249855	0.070412	0.0267189	-0.100828	0.0278743
Mansc1	889	0.0251131	0.0707198	-0.0662974	-0.229675	0.0726791
Gas2l3	772	0.0252167	0.0709598	-0.0106062	0.00751181	-0.039143
Cnn2	819	0.0252734	0.0710676	-0.0161173	0.0257605	0.036927
Rbm4b	410	0.0253768	0.0712544	0.0276045	0.0286191	0.0161882
Ercc4	346	0.0253639	0.0712544	0.0175539	0.005503	0.0110121
Gm20186	855	0.0256759	0.0720419	0.00546781	0.011848	0.0120402
Slc5a1	894	0.0261439	0.0733017	0.0075385	-0.0226644	0.0383125
Mthfd2l	895	0.0264124	0.0740007	-0.0897219	-0.127536	0.0654343
Itga6	898	0.026997	0.0755838	-0.067737	0.0473456	0.100731
Cd47	899	0.0271269	0.0758923	0.0204427	0.0438475	0.0789462
Gm7694	900	0.0272217	0.0761023	0.00232302	0.00912618	0.0233572
Rap1b	776	0.0273169	0.0763132	-0.261166	0.0737135	0.0569396
Rbbp6	777	0.0275088	0.0767936	0.0180522	0.0607135	0.0489274
Aftph	778	0.0278947	0.0778148	-0.0283382	0.0499508	0.0622376
Exph5	550	0.0279842	0.078008	0.0166152	0.00535078	0.0283961
Eya1	426	0.0286413	0.0797468	0.0158315	-0.0133206	0.0303512
Htra3	780	0.02867	0.0797468	-5.27253e-06	0.0192521	0.0189837
Tirap	902	0.0286614	0.0797468	-0.0858935	0.0129396	0.0412917
Fam13b	756	0.0287496	0.0799107	0.0120282	0.0195537	0.00809731
Caprin2	355	0.0287935	0.0799175	0.0163215	0.00879179	-0.00378244
Crtc3	782	0.0287795	0.0799175	0.0101764	0.0293232	0.0136744
Dclre1c	751	0.0288538	0.0800274	0.00785131	0.0138977	0.0093892
Cobl	784	0.0293069	0.0812256	0.00900366	0.0400844	0.0351361
Qk	785	0.0294623	0.0815977	-0.0277005	0.0362434	-0.0242642
Tpm1	905	0.0296326	0.0820104	-0.313477	-0.0977595	0.0931212
Npy	906	0.029752	0.082282	-0.36193	-0.280734	0.160228
Phip	358	0.0297749	0.0822861	0.0502214	0.0229118	-0.148181
4833420G17Rik	360	0.029831	0.0823821	0.040158	0.00800446	0.0517727
Gm14966	908	0.0298781	0.0824534	0.0037517	-0.0123266	0.016277
Gm26670	881	0.0302217	0.083342	0.00115506	0.0130511	0.0159448
Ric1	439	0.0304743	0.0839785	0.0236493	0.0219175	0.0251006
Tsix	594	0.0306348	0.0843604	0.0145064	0.0116108	0.0203332
Fus	787	0.0309571	0.0851872	0.0228534	0.0754589	-0.342239
C130032M10Rik	911	0.0311555	0.0856111	-0.00867465	-0.00645802	0.0130481
Lgmn	788	0.0311432	0.0856111	-0.0107605	0.0414668	0.0256417
Tmem91	390	0.0315149	0.0865369	0.0126023	0.0118267	0.00577753
Hist1h1d	361	0.0315454	0.0865591	0.0134958	0.00844165	-0.0394029
Cir1	363	0.0316825	0.0868737	0.0584104	-0.0290952	-0.0856974
Smim19	914	0.0319276	0.0874835	0.0180148	-0.183422	0.0977976
Rtf1	790	0.0320738	0.0878218	0.0140525	0.0647194	-0.175221
C5ar2	915	0.0323919	0.0886299	0.0152658	-0.181169	0.0861334
Sf1	793	0.032473	0.0887887	-0.00306945	0.0504151	-0.00503644
Snap29	367	0.0326106	0.0891018	0.0308593	0.00393437	0.0265999
Actb	794	0.0327341	0.089376	-0.199314	0.0997633	-0.211621
Plk3	795	0.0328044	0.0895044	0.000830504	0.0140047	0.0045802
Larp7	784	0.0330538	0.0901212	0.023141	0.0450751	-0.180804
Erbb2	916	0.0331087	0.0902072	-0.00587884	-0.0284176	0.0563414
Mfn1	774	0.0331614	0.0902869	0.0243448	0.0118912	0.0626423
Gpr137c	727	0.0332381	0.0904319	0.0151287	0.0269396	0.0240078
Khk	453	0.0333061	0.0905527	0.0392102	0.0345702	0.0560625
Cacnb1	462	0.0333294	0.0905527	0.0115724	0.0108275	0.0138071
Fam102a	800	0.0333892	0.090625	-0.0239971	0.027699	0.0290076
Smagp	919	0.033403	0.090625	-0.297123	-0.504718	0.0944514
Suco	801	0.034068	0.0923642	0.0134287	0.0308235	0.00744663
Unc93b1	801	0.0341098	0.0924127	0.0208417	-0.00580912	0.0583789
Tm7sf3	924	0.0343324	0.0929504	0.00989103	0.00434487	0.0361797
Amhr2	372	0.0345979	0.0936035	0.0366417	-0.034905	0.0308184
Paxbp1	804	0.0346774	0.0936871	0.011227	0.025958	0.0193511
Kpna4	803	0.0346739	0.0936871	-0.021566	0.0390681	0.0142865
Paqr3	435	0.0347247	0.0937494	0.0116504	0.00316494	0.0129202
Ppp2r5a	897	0.0347571	0.0937713	0.0136661	0.0333417	0.0493468
Ddx6	805	0.0348459	0.0939452	-0.000428212	0.0494282	0.0145116
Chd9	449	0.0351075	0.0945842	0.036132	0.0108826	0.0478588
Ccdc186	927	0.0352649	0.094942	-0.069673	0.0230484	0.0724933
Bet1l	928	0.0355041	0.0955193	-0.0946625	-0.103971	0.082169
Cryab	806	0.0356397	0.0958175	0.00407659	0.0345285	-0.00438489
Metrnl	929	0.0358881	0.0964181	0.0127518	-0.0474323	0.0493629
Sbno1	635	0.0360187	0.0967015	0.0368471	0.0513896	-0.0333511
Nthl1	375	0.0360641	0.0967561	0.0249811	-0.00942297	-0.00546968
Git2	810	0.0366443	0.0982445	0.00995443	0.0365925	-0.0329228
Atp2c1	934	0.0369579	0.0990163	0.0120868	0.00138977	0.0566667
9330160F10Rik	376	0.0370397	0.0991666	0.0195514	0.0131916	0.0126995
Chmp4b	812	0.0372963	0.0997845	-0.22001	0.073961	0.0784251
Tpm2	814	0.0374362	0.100089	0.00542867	0.0142517	0.0116662
Ggnbp2	937	0.0374832	0.100146	-0.0194871	0.0123208	0.0677883
Lrig3	377	0.0377336	0.100745	0.019388	0.003733	0.01435
Met	815	0.0378454	0.100973	-0.0418391	0.0246718	-0.012271
Tprn	378	0.038113	0.101617	0.0186376	0.00886187	0.00576672
Slc16a1	817	0.0382473	0.101905	-0.0038884	0.0121519	-0.00906629
Gpi1	941	0.0384193	0.102222	-0.00518433	-0.019382	0.138308
Dynlt3	940	0.0384084	0.102222	-0.242704	-0.303977	0.0942412
Rilp	684	0.0386239	0.102674	0.00746256	0.00241794	0.0123458
Lif	818	0.0386692	0.102674	-0.00199681	0.0154088	-0.00920314
BC017643	943	0.0386554	0.102674	-0.0183158	0.00410977	0.0343942
Cngb1	867	0.039238	0.104113	0.013155	0.0160972	0.0428534
Surf1	380	0.0393326	0.104223	0.0572667	0.0126805	0.0495961
Malt1	381	0.0393382	0.104223	0.0173018	0.00814734	-0.0024172
Snai1	822	0.0393606	0.104223	-0.0154771	0.0198289	0.0132957
Diaph1	823	0.0396028	0.104793	-0.0601194	0.0403046	-0.0377581
Zfp263	539	0.0397589	0.105134	0.0217338	0.0224458	0.0327144
Tef	465	0.039871	0.105326	0.0312057	0.0143656	0.0433878
Rbm48	416	0.0398862	0.105326	0.0279506	0.0227073	0.0358236
Prnp	946	0.0399636	0.105458	-0.147726	-0.106471	0.0674066
Hist1h3d	947	0.0401874	0.105976	-0.00411726	-0.0117963	0.0117941
Chd7	949	0.0402843	0.106159	-0.0427399	0.0222574	0.0542177
Dsp	826	0.0407119	0.107213	0.00461329	0.0346651	-0.131665
Gpank1	475	0.0412301	0.108429	0.0228701	0.0301963	0.0103106
Myh14	829	0.0412043	0.108429	-0.0286674	0.029873	0.0125724
Sh3bp1	385	0.0412723	0.108466	0.0221324	0.016974	0.0231201
Ehd4	841	0.0419556	0.110187	-0.243798	0.0738153	0.0921774
1700084E18Rik	387	0.0421103	0.110518	0.0134355	0.00492603	0.0140535
Ccdc84	388	0.0421813	0.110629	0.0252597	0.0182792	-0.0106142
Klf11	832	0.0422907	0.110841	-0.0152217	0.0259523	0.018416
Gulp1	956	0.042971	0.112547	0.000479038	-0.00370363	0.00916885
Gm26881	957	0.0432006	0.113072	-0.0121342	-0.0146119	0.0153267
1700018L02Rik	502	0.0433612	0.113415	0.0124816	0.00385868	0.0174012
Vps72	392	0.0434436	0.113554	0.0524146	-0.014583	-0.00174728
Ypel2	960	0.0439165	0.114712	-0.0170097	-0.0121291	0.0159122
Fam83b	833	0.0440992	0.115111	0.00512871	0.0137284	0.00823872
Ipmk	750	0.0441786	0.115241	0.0109721	0.0182896	0.0126
C030034I22Rik	393	0.0444172	0.115785	0.0151967	0.00795214	0.00956614
Map2k5	962	0.0450086	0.117247	-0.00522797	0.00426439	0.0352514
Rangap1	836	0.0452525	0.117803	-0.0758174	0.0338195	-0.349112
Hsd11b1	963	0.0453937	0.118091	0.00282238	0.00468853	0.00991261
Hspbap1	965	0.0458448	0.119184	-0.0110967	0.00767203	0.0180159
Ccng1	421	0.0458985	0.119243	0.0400409	0.0347566	-0.00497809
Irgq	966	0.0459327	0.119252	-0.0827146	0.0260098	0.05766
Pabpn1	839	0.046142	0.119715	-0.0228221	0.049369	-0.0582775
Tacc1	840	0.0463476	0.120167	0.00391333	0.029501	-0.00333412
Larp4b	843	0.0465633	0.120646	-0.0276484	0.0497844	-0.0891823
Ier2	398	0.0468877	0.121405	0.0823562	-0.0966045	0.00202958
Flvcr1	844	0.0469339	0.121443	-0.0469175	0.0254533	0.0075577
Ribc1	920	0.0473585	0.122459	0.00507513	0.00544145	0.0134962
Ccl27a	571	0.0473973	0.122478	0.0298035	0.0302282	0.049393
Spdef	828	0.0475578	0.12281	0.0132534	-0.0740674	0.0351611
Stambpl1	970	0.0476052	0.12285	-0.0969319	0.0138723	0.0266552
Hdac5	845	0.0478981	0.123523	-0.00972426	0.0382408	0.0187905
Plekhg2	846	0.0480141	0.12374	0.00477053	0.0157373	0.0107117
Avl9	847	0.0482178	0.124182	-0.00653125	0.0314015	0.0270493
Eno1b	403	0.0485484	0.12495	0.0260978	0.00853292	0.0238163
Gm20219	973	0.0486774	0.125198	-0.00970868	-0.00927839	0.0355778
Bclaf1	404	0.0487651	0.12534	0.067244	0.00189403	-0.152936
Tfap4	405	0.0490171	0.125904	0.0142097	0.00281474	0.00326395
Mfsd10	849	0.049084	0.125992	0.00964675	0.0357504	-0.0310237
Luc7l	685	0.0494298	0.126711	0.0262073	0.0396337	-0.00741822
Eif5b	850	0.0494061	0.126711	-0.192749	0.0776567	-0.0289807
Nckipsd	974	0.0494774	0.126749	0.00126145	0.00155639	0.00858365
Usp19	873	0.0499748	0.127938	-0.0312252	0.0333137	0.0438053
Fam135a	853	0.0505598	0.12935	-0.00496664	0.0145305	-0.0228364
Atp6v1a	979	0.0507638	0.129786	-0.181955	-0.0855501	0.0966843
Zbtb11	479	0.0514423	0.131433	0.0244699	0.0227464	0.0262494
Uap1l1	510	0.0517146	0.131803	0.0417008	0.0086644	0.0559748
5930430L01Rik	413	0.0517235	0.131803	0.027852	-0.0301138	0.0296687
Letm2	412	0.05165	0.131803	0.0174421	0.00701311	0.0120716
Tmcc3	981	0.0517225	0.131803	-0.085544	-0.00518457	0.0311894
B3gntl1	414	0.0523332	0.133268	0.0145074	-0.0055083	-0.00110494
Klhl25	906	0.0523909	0.133327	-0.0727677	0.0223321	0.0272503
2310033P09Rik	415	0.0525911	0.133749	0.0417973	-0.0653432	-0.0506112
Slc9a3r1	983	0.0527012	0.13394	-0.148696	0.0168398	0.0820284
Vegfb	417	0.0527528	0.133983	0.0483361	0.0336235	-0.0422933
Smim4	420	0.0534531	0.135673	0.0381001	-0.039114	-0.0196215
Khnyn	726	0.0537657	0.136376	0.0134913	0.0161172	0.0275151
Nr4a3	860	0.0538315	0.136453	-0.00351795	0.00944102	-0.00388489
Chka	986	0.0542195	0.137347	-0.0209841	0.0361142	0.0694008
Pdxp	423	0.0544105	0.13774	0.0106319	-0.0088926	-0.0165502
Mecp2	977	0.0545021	0.137881	0.00540807	0.027988	0.0399609
Cfl2	864	0.0550367	0.139143	-0.114642	0.0532183	0.0280123
Nudt7	991	0.0553822	0.139924	-0.0181211	-0.0875318	0.0296205
Gtf2ird2	427	0.0555739	0.140317	0.0137542	0.0102032	0.0134531
Peak1	988	0.055648	0.140346	-0.0148936	0.0185477	0.0272085
Cp	993	0.0556582	0.140346	-0.570712	0.00818113	0.131789
Mapk13	868	0.0556958	0.140349	0.0222154	0.0555133	-0.0500875
Edrf1	995	0.0559164	0.140813	0.00510142	0.00692847	0.0195515
Vldlr	428	0.0561369	0.141276	0.0295284	0.00860023	-0.0206476
Gm26808	528	0.0561763	0.141283	0.0159066	0.00622893	0.0226297
Hspa4	998	0.0574199	0.144317	-0.0395446	-0.0561503	0.0519018
Rsrc2	871	0.0574793	0.144372	-0.0543449	0.0682027	0.0235947
Fam107b	872	0.0576463	0.144697	0.00216833	0.0150964	0.00533907
Lrrc8e	1000	0.0581106	0.145768	-0.0272433	-0.00596965	0.0163938
Slc25a16	1002	0.0584692	0.146572	-0.0951733	-0.155831	0.0368721
Map3k20	877	0.0594112	0.148671	0.00507053	0.0165843	-0.00428014
Erbb3	878	0.0594221	0.148671	-0.11853	0.042063	-0.026042
Bzw1	876	0.0593616	0.148671	-0.172952	0.0515197	-0.199697
Carf	433	0.0595203	0.14882	0.0141806	0.0002868	-0.00214397
Kmt2c	1006	0.0596767	0.149115	-0.00770544	0.0258609	0.0471382
Prss36	542	0.060157	0.150211	0.0196869	-5.91959e-05	0.02663
Rnd3	879	0.0602008	0.150211	-0.0017385	0.0200591	-0.0169244
Ddit4	882	0.0602324	0.150211	-0.0919177	0.0351949	0.063501
Fbxo46	436	0.0607287	0.151351	0.013076	0.00473109	0.00579378
Mum1	437	0.0608074	0.151395	0.0246005	-0.0504514	-0.0747013
Cpeb3	438	0.0608249	0.151395	0.0200904	-0.00136631	0.00593547
Pcgf1	440	0.0610201	0.151783	0.0209598	-0.0345631	0.00731437
Gata3	1010	0.0611616	0.152037	0.00799073	-0.37135	0.0755724
Luc7l3	884	0.0614723	0.152711	-0.0141247	0.0571659	-0.207971
Ppargc1a	441	0.0616422	0.153034	0.0178584	-0.0403949	-0.0116232
Sept2	1013	0.0620616	0.153977	0.00449175	0.00586406	0.0113092
Tmem245	547	0.0627271	0.15525	0.0220016	0.0207501	-0.0234952
Maml3	647	0.0626437	0.15525	0.0120405	0.013132	0.0191644
Phactr4	959	0.0627081	0.15525	0.00851227	0.0104336	0.0381292
Sesn3	1017	0.0627359	0.15525	-0.0310898	-0.0273154	0.0608115
Abcc10	445	0.062972	0.155735	0.0112416	0.00357519	-0.000152134
Spast	887	0.063419	0.156713	-0.0172277	0.0307314	0.0223497
Acsl1	1018	0.0634489	0.156713	-0.111985	-0.0486464	0.057649
Cox7a1	1020	0.0635907	0.156963	-0.0635131	-0.0949462	0.0578877
Ing1	446	0.0636611	0.157036	0.0305071	-0.0193443	-0.056207
Simc1	891	0.06407	0.157944	0.00580563	0.011363	0.0112435
Spg20	448	0.0642355	0.158197	0.0304822	-0.000364037	0.0343212
Jak2	1022	0.0642546	0.158197	0.00408652	0.0156836	0.0248221
Kif13b	683	0.0650217	0.159678	0.0198979	0.0149492	0.039001
Id3	451	0.0649342	0.159678	0.0187883	0.0104554	0.00439152
Slc4a7	892	0.0649789	0.159678	0.00896759	0.0187281	-0.00675465
Lzts2	1026	0.0650186	0.159678	-0.0631328	0.0344082	0.0283993
1810043G02Rik	1028	0.0650836	0.159728	-0.14381	-0.416745	0.096259
Alkbh5	452	0.0653072	0.160175	0.0425703	0.0235388	0.00874229
Muc20	1031	0.0659211	0.161578	-0.0713778	-0.0304201	0.0313319
Fam133b	570	0.0667962	0.163619	0.0384957	0.0469042	-0.126084
Prr14	743	0.0670456	0.164126	0.0141129	0.0247471	0.0168763
Rab6a	895	0.0671479	0.164272	-0.103249	0.0454398	0.0257139
Rtl5	556	0.0672945	0.164522	0.0167716	-0.0236897	0.0194888
Ttl	686	0.0673356	0.164522	0.0115051	0.0187089	-0.005201
Rbm38	456	0.068036	0.166128	0.0149663	0.00872867	-0.00352511
Osgin2	458	0.0682622	0.166575	0.0190257	-0.0124488	-0.027708
Xpo5	563	0.0689443	0.168133	0.0104179	0.0100819	0.00600579
Tec	967	0.0690603	0.168204	0.00232979	0.0138516	0.0160503
Brwd3	1038	0.0690421	0.168204	-0.0256649	0.00355787	0.024276
Samd5	1040	0.0691538	0.168325	-0.00835412	0.00627346	0.0072369
Snx17	1041	0.0692796	0.168525	-0.402568	-0.239366	0.099078
AC165953.2	903	0.0705709	0.171558	0.0066559	0.01445	0.00844535
Gm8797	1047	0.0707396	0.17186	-0.347733	-0.136566	0.0903819
Wwp2	891	0.0708544	0.17203	0.0159284	0.0259838	0.0312056
Stat2	1048	0.0709561	0.172166	0.006524	0.0149225	0.0304427
Ube4b	1049	0.0709994	0.172166	-0.00544081	0.0120587	0.0470497
1810064F22Rik	721	0.0711483	0.172419	0.00716609	-0.00679825	0.011074
Lefty1	1051	0.0713435	0.172783	0.00287599	-0.0470486	0.0157947
Gtpbp6	905	0.0718313	0.173855	0.00180559	0.0327466	0.00323909
Nav3	1054	0.0719938	0.174139	-0.0532987	0.0149756	0.0459937
Wbscr25	1043	0.0723119	0.174799	-0.00284471	0.00971269	0.0102327
AI480526	636	0.0733515	0.17709	0.0125307	0.0170892	-0.00907583
Lats2	907	0.0733221	0.17709	0.00689298	0.0168166	0.0111615
Zfp638	463	0.0737143	0.177744	0.0346572	-0.0165585	0.0154875
Rom1	909	0.0736811	0.177744	0.00043251	0.00899282	-0.00508282
Gm49322	1057	0.0741601	0.178707	0.00170331	0.00371643	0.0128329
Dcn	803	0.0742503	0.178813	0.00601442	0.0122369	0.0110393
Agk	464	0.0748398	0.18012	0.0205295	-0.00250415	-0.0121026
Nim1k	643	0.0755933	0.18182	0.00784386	-0.0056213	0.0105294
Tmem161b	466	0.0761203	0.182973	0.0158915	-0.00296401	-0.0177708
Nufip2	910	0.076303	0.183184	0.0140979	0.0291806	0.00476327
Camk2d	1062	0.0762747	0.183184	-0.109782	0.0104111	0.0573308
Sema3c	911	0.0766411	0.183882	0.00184805	0.0136602	-0.0222385
Slc6a6	913	0.077007	0.184645	0.00251242	0.0165664	-0.00171056
Nfe2l2	914	0.0770836	0.184713	-0.0257598	0.0486576	-0.0647618
Nr4a1	468	0.0773185	0.185161	0.0467149	-0.117804	-0.157162
R3hdm1	749	0.0776293	0.18562	0.0291767	0.0416334	-0.0303281
Card10	918	0.0777026	0.18562	0.00162064	0.00931031	-0.00227159
Ubtd2	915	0.0775653	0.18562	-0.00470622	0.0180042	0.00823898
Pros1	917	0.0776912	0.18562	-0.0671193	0.0264801	-0.0313458
Gnai2	1066	0.0784824	0.187367	-0.107954	0.0035723	0.0853439
Plekha7	470	0.0787228	0.187825	0.0154294	0.008668	0.00434141
Copz2	1068	0.0789048	0.188143	-0.229863	-0.256199	0.082843
Swt1	1069	0.0792936	0.188953	-0.0180835	0.0172013	0.0540681
mt-Nd6	477	0.0793429	0.188954	0.0187705	0.0160849	0.00227521
Hrct1	471	0.0795458	0.189264	0.0478458	-0.103791	0.00718483
Gnl2	920	0.0796203	0.189264	0.00516634	0.0366072	-0.01959
Scap	1071	0.0795868	0.189264	-0.0333165	-0.0240922	0.0528478
Riox1	671	0.0799119	0.18984	0.0132776	0.0201116	0.0217721
Tmed5	921	0.0807068	0.19161	-0.197301	0.0392661	-0.0618349
Pxn	1071	0.0808762	0.191844	0.00288681	0.0238331	0.038878
Mdm2	922	0.0809047	0.191844	-0.00703069	0.0317584	0.00788762
Zfp524	473	0.0812856	0.192629	0.0265459	-0.0150496	0.0146937
B930036N10Rik	592	0.081447	0.192893	0.0119926	0.00947445	0.00609093
Acvrl1	561	0.0822252	0.194617	0.017384	0.0143777	0.0227004
Bdp1	924	0.0827437	0.195724	-0.0285183	0.0321578	-0.0371369
Tanc2	925	0.0828542	0.195865	0.00745899	0.0348708	-0.000712705
Ptpn18	1076	0.0829321	0.195929	0.00782354	-0.0214404	0.072807
Edn1	1077	0.0829865	0.195937	3.1253e-05	0.00317274	0.00901743
Osr1	476	0.0830423	0.195949	0.0071827	-0.00739842	-0.000178442
Hist1h2be	1078	0.08343	0.196744	-0.0178609	-0.0269063	0.030311
Aktip	1081	0.0837842	0.197458	-0.0242415	-0.0277865	0.0496828
Bbs5	478	0.0841361	0.198167	0.00993721	0.00144915	-0.00811356
Mb	1083	0.0847424	0.199473	-0.0338756	-0.0338751	0.0229424
Aldh1l2	1084	0.0848794	0.199674	-0.00257344	0.00770915	0.0121145
Epc1	530	0.0854081	0.200673	0.0281073	0.0245902	-0.0154854
Dyrk3	927	0.0853646	0.200673	-0.0828193	0.0258708	-0.112561
Poc5	480	0.0857381	0.201325	0.0153703	0.00275492	0.000459183
Ifngr1	687	0.0860177	0.201736	0.0212344	0.0229771	0.0306451
Irgm1	1062	0.0859998	0.201736	-0.0395538	0.0191854	0.0263621
D930016D06Rik	928	0.0862926	0.202258	-0.00931934	0.0137555	-0.0191056
Coro2a	482	0.0866212	0.202905	0.0112481	0.00810105	-0.00804818
Lnpk	602	0.0873697	0.204491	0.0215965	0.0245369	-0.0671623
Ppp2ca	930	0.0874044	0.204491	-0.167548	0.0546797	-0.0753642
Clybl	484	0.0876088	0.204845	0.0455088	-0.0268118	0.0156322
Ino80d	485	0.08816	0.205836	0.02823	0.0188115	0.0157638
Thnsl2	1091	0.0881913	0.205836	-0.0262148	-0.0293716	0.0352269
1810013L24Rik	932	0.0881925	0.205836	-0.0313191	0.0280431	0.0253939
Abhd18	487	0.0886933	0.206754	0.0165876	-0.00708339	0.00552632
Dhrs11	486	0.0886478	0.206754	0.0129254	-0.000714371	0.0110735
Galc	1094	0.0891082	0.207596	-0.000928047	0.00012585	0.0232653
Mylk	1095	0.089314	0.20795	-0.016484	-0.0246528	0.021796
Usp33	488	0.0895241	0.208314	0.023156	0.00800237	0.0130641
Noct	937	0.0897895	0.208805	-0.0561211	0.0160883	-0.00622452
Tpm3	938	0.0899101	0.20896	-0.146878	0.0573284	-0.0868178
Celf4	608	0.0901023	0.209209	0.00950207	0.00214053	0.00868502
Ppil4	940	0.0901258	0.209209	-0.0139003	0.0388628	0.0108441
AI661453	1096	0.0903474	0.209597	-0.0357914	0.0120848	0.0163576
Ripor1	764	0.0906822	0.21021	0.00793021	0.0118237	0.0119411
Pigr	1097	0.0907205	0.21021	-0.0449489	-0.0221737	0.0438757
Ankra2	490	0.0909916	0.210699	0.0248066	0.00730052	-0.0245047
Fbxo44	680	0.0910409	0.210699	0.024458	-0.022064	0.0425799
Cbx4	496	0.0911805	0.21077	0.0218809	-0.0093663	0.0177039
C1rb	1099	0.0911646	0.21077	-0.00199368	0.00254215	0.00724342
Spa17	1102	0.0916361	0.211696	-0.0083514	-0.0531854	0.0329853
Slc41a2	978	0.0921881	0.212844	-0.0375989	0.011528	0.0145297
Il18r1	1090	0.0922784	0.212925	-0.0143971	0.00820524	0.0070483
Slc5a8	1103	0.0924096	0.2131	-0.138037	0.0279186	0.047862
Siah2	1104	0.0925931	0.213396	-0.0205171	0.0269461	0.0303787
Xrn1	942	0.0926876	0.213485	0.0144672	0.0091547	0.0378507
Kantr	613	0.0927425	0.213485	0.00892194	0.0085494	0.00673405
Haus4	494	0.0931311	0.214252	0.0181171	-0.00131296	-0.306118
Cep95	495	0.0933935	0.214727	0.0153013	0.00437496	0.00915027
Kpna2	943	0.0934776	0.214793	-0.0183063	0.0189187	-0.119471
Leng8	986	0.0939033	0.215642	0.000648733	0.0261781	0.0338309
Ctdp1	731	0.0944934	0.216868	0.00947304	0.0115124	0.0151678
Trrap	945	0.0946675	0.217139	-0.000358324	0.0222221	-0.0101412
Vps13d	904	0.0953187	0.218502	0.0111059	0.0112985	0.0289884
Col12a1	1111	0.0954027	0.218565	-0.0224851	0.00872775	0.00391745
Alcam	500	0.0957046	0.219127	0.0151193	0.00501369	-0.0306165
Hist2h2aa1	748	0.0962777	0.220308	0.0159379	0.00245581	0.0271187
Tle6	1116	0.0971567	0.222188	-0.00187903	-0.0152548	0.0517772
Tyro3	832	0.0972912	0.222363	0.0153485	0.023189	-0.0133783
March3	808	0.0975725	0.222874	0.00624878	0.010935	0.011111
Slc30a1	927	0.0981133	0.223977	0.00835148	0.0168422	-0.013344
Ndfip1	1118	0.0985197	0.224772	-0.0241925	0.0159666	0.0512299
Fbxw7	987	0.0991618	0.225969	0.0109748	0.0308466	0.0343492
Tmem8b	1119	0.0991401	0.225969	0.000456126	-0.00101174	0.011324
Zbtb44	953	0.0992236	0.225977	0.00598569	0.0217039	0.0195096
Mxra8	629	0.0994157	0.226281	0.00712712	-0.00474566	0.00795963
Tgfb1	954	0.0998124	0.22705	-0.0104388	0.0297146	-0.0930778
Znrf1	1122	0.100082	0.227528	-0.150476	0.0386414	0.0607737
Rbm15	633	0.100701	0.228801	0.0148742	0.0147247	-0.0604737
Enpp1	958	0.10092	0.229165	-0.0161672	0.0279594	-0.0161237
Nadk2	810	0.101074	0.229378	0.0110515	0.0142383	0.0158472
Trim21	831	0.101679	0.230577	0.00713023	0.00878411	0.00814605
Vav2	959	0.101722	0.230577	0.0065439	0.0176813	-0.00033402
Zc3h13	508	0.10189	0.230823	0.0344213	0.00290302	-0.0705762
4430402I18Rik	961	0.10236	0.231752	-0.0271974	0.0149569	0.00320229
Wfdc12	963	0.102672	0.23205	0.00688738	0.0134141	0.00877513
Smg1	962	0.102634	0.23205	-0.0025392	0.0247128	0.0261067
Ppp1cc	1125	0.102631	0.23205	-0.247439	0.0303252	0.0895433
Ptpn13	822	0.102973	0.232593	0.00545376	0.00811753	0.00358554
Gm20342	512	0.103593	0.233719	0.0128368	0.00186709	-0.00372164
Oasl2	1129	0.103571	0.233719	-0.0257918	-0.00385052	0.00626537
C920021L13Rik	641	0.104619	0.235898	0.0234201	0.0171956	0.0270655
N4bp2l1	968	0.104753	0.236062	-0.00956991	0.0188496	0.00530225
Zranb1	642	0.105183	0.236613	0.0339425	0.0388661	0.036975
Gas1	513	0.105305	0.236613	0.0145965	-0.0233434	-0.0263655
Ptk7	835	0.105271	0.236613	0.0117042	0.0202606	0.0144815
Ehd2	969	0.105285	0.236613	-0.00111457	0.00987862	-0.0116661
Cyld	1133	0.105148	0.236613	-0.0139986	0.0213433	0.0267307
Col4a6	1136	0.105962	0.237952	-0.00653047	0.0193376	0.0274221
Abhd5	1133	0.106284	0.238537	-0.18857	-0.0621318	0.0473757
Als2cl	587	0.106749	0.23944	0.0101014	0.0092298	-9.87597e-05
Aggf1	970	0.106811	0.23944	-0.0027703	0.0308151	0.00628702
Amer1	515	0.1071	0.239948	0.023278	-0.0394038	-0.00502239
Acot6	1134	0.107322	0.240307	0.00537716	-0.0156216	0.0186249
Gm26632	971	0.107597	0.240784	-0.00815422	0.0120742	0.0119352
Ltbp3	972	0.107689	0.240849	-0.0318459	0.05033	0.0685954
Atp8b5	970	0.108323	0.242126	0.00519321	-0.00776035	0.0151488
Gas2l1	974	0.108401	0.242161	-0.0368666	0.0229508	-0.0178883
Arl5b	975	0.108702	0.242693	-0.0218561	0.0223302	-0.029329
Bmp2k	976	0.108847	0.242875	-0.0471052	0.0208867	0.0107815
Tmprss2	1137	0.10948	0.244147	-0.0113194	0.00469291	0.0330839
Adam9	980	0.109698	0.244491	-0.0572814	0.0238035	-0.0112471
Efna2	522	0.110288	0.245664	0.0070526	0.00441135	-0.0053036
2610037D02Rik	1003	0.110669	0.246371	0.00755231	0.0162965	0.0203545
Snhg20	523	0.110779	0.246474	0.0354817	0.0118563	-0.0560416
Il18bp	1138	0.111045	0.246782	-0.0297993	-0.0164548	0.0258604
Pum2	983	0.111043	0.246782	-0.0324471	0.036434	-0.0301155
Mdc1	984	0.111195	0.246971	-0.00762118	0.0141572	-0.0116285
Nfe2l3	1033	0.111308	0.24708	-0.00756404	0.00925868	0.0109189
Acot2	524	0.111439	0.24723	0.016664	-0.0141492	-0.000732459
Tab1	526	0.111693	0.247649	0.0164965	-0.00882759	-0.0125226
Dnajb4	989	0.112081	0.248368	-0.0504053	0.0282347	-0.0505907
Pcdhb14	1141	0.112543	0.249248	-0.0067418	-0.0172092	0.00959168
Map3k14	1142	0.113384	0.250967	-0.026731	0.0152611	0.0238389
Stom	991	0.114056	0.252309	-0.00969689	0.00902858	-0.0131302
Hpcal1	1143	0.114219	0.252525	-0.0533389	-0.167694	0.0394094
Mga	532	0.114766	0.253589	0.0330643	0.0189033	0.00874863
Wdr54	534	0.115524	0.255118	0.0113771	0.000564015	-0.00943479
Yes1	995	0.116182	0.256424	0.00200026	0.0256765	-0.0667109
Tor3a	1147	0.116364	0.256634	-0.0155804	-0.0361979	0.0197459
Vps37b	996	0.11641	0.256634	-0.0359989	0.0355939	0.0131116
Fbrsl1	1162	0.116582	0.256868	-0.0187881	0.01856	0.0262542
Ambra1	998	0.11673	0.25695	0.00861636	0.0205514	0.0175735
Sf3b3	999	0.116753	0.25695	-0.0704699	0.0404346	-0.200909
Slc25a37	536	0.117141	0.257658	0.0188812	0.00624369	-0.00203387
Crybg2	1148	0.11724	0.257728	-0.013793	-0.00102655	0.0158842
Aph1c	1149	0.11746	0.257934	-0.000622978	-0.0159068	0.0216529
Smndc1	1000	0.11747	0.257934	-0.00083545	0.0294784	-0.00510001
Cst6	1150	0.117535	0.257934	-0.00138487	0.00193568	0.0399732
Rbl2	558	0.11764	0.258019	0.0231156	0.00567863	0.0282958
Emsy	537	0.119036	0.260783	0.0228497	0.00994469	-0.00787892
Jrkl	1151	0.119013	0.260783	0.00511693	0.00648023	0.0230765
Hspb6	554	0.11926	0.261017	0.0140049	0.0120417	-0.0464648
Cep350	1001	0.119278	0.261017	-0.00325699	0.0186664	0.00396702
Rnf208	670	0.119475	0.261302	0.0104775	0.0119722	-0.0402099
Cbarp	770	0.120736	0.263909	0.010224	0.0105109	0.0163023
Isg15	1155	0.120828	0.26396	-0.0482684	0.00105272	0.0184489
Arglu1	1005	0.121189	0.264599	0.0120772	0.0391445	-0.138549
Arl10	1156	0.121988	0.266193	-0.00474768	0.00195641	0.00942829
Clasp2	1157	0.122554	0.267278	-0.00632215	-0.00257431	0.0235625
Ntf5	811	0.123193	0.26852	0.0150865	0.00318697	0.0286946
Dexi	544	0.123516	0.269071	0.0369173	-0.134781	0.0443025
Baz1b	545	0.124419	0.270733	0.0292028	0.0136397	-0.180522
Fnbp1	681	0.124393	0.270733	0.0200574	0.0209782	0.0206387
Bckdha	1161	0.124736	0.271269	-0.214139	-0.297125	0.0826738
Gm3839	1008	0.124871	0.27141	0.0140553	0.0276629	-0.0601376
Spata5	1163	0.125218	0.272011	0.00493519	0.0143909	0.015605
Smr2	767	0.125981	0.273515	0.0078258	0.0114841	0.00807812
Gm10282	672	0.126309	0.274072	0.00598068	0.00570185	-0.0464192
C030014I23Rik	548	0.126717	0.274803	0.0124649	-0.0141027	0.0114881
Capn2	1012	0.127543	0.276438	-0.0474165	0.0254968	0.00342888
Ankrd61	1188	0.127686	0.276593	0.000845098	0.00595399	0.00602188
Zfp934	549	0.128076	0.277282	0.0101243	-0.00696799	-0.0258122
Klf10	1193	0.128709	0.278496	-0.0264962	0.0227912	0.0256413
Cdkn1b	892	0.129216	0.279007	0.0126939	0.0231526	-0.0078699
Cul9	689	0.129128	0.279007	0.0100827	0.0101572	0.00421688
Sema4b	1165	0.129234	0.279007	0.00255375	0.0160164	0.0337281
F2rl1	1014	0.129177	0.279007	-0.0172923	0.0139163	0.00629557
Nsd2	1017	0.129921	0.280333	-0.0425487	0.0285364	-0.139069
Arrdc3	551	0.130022	0.280395	0.0349048	0.027732	0.01906
Spns2	1166	0.130256	0.280742	-0.0442811	-0.0341162	0.0427568
Gm5914	772	0.131519	0.28322	0.00779893	0.0134677	0.00629806
Gjb2	1169	0.131626	0.28322	0.00705439	-0.0353014	0.0270703
Dusp16	1021	0.131558	0.28322	-0.022594	0.0279452	0.0292646
Akap9	1170	0.132684	0.285338	-0.0461457	-0.0187028	0.0691646
Lrrfip1	1024	0.133196	0.286279	-0.0917053	0.0450277	0.0332887
9130230L23Rik	1022	0.133288	0.286316	0.010313	-0.105173	0.0331982
Ckap2l	666	0.134095	0.287891	0.0107385	0.0100306	-0.400009
Exosc8	555	0.134312	0.288195	0.0235578	-0.0141237	-0.287944
Gchfr	581	0.134944	0.289391	0.0144432	0.0119247	-0.0114109
Zfp839	1019	0.135341	0.29008	0.00547466	-0.00188386	0.0128315
Zfp407	975	0.1356	0.290475	0.00743203	0.0116288	-0.00557996
Cry2	559	0.135716	0.290562	0.0253138	-0.0132304	-0.0152182
Crybg1	1027	0.136105	0.291232	-0.0678281	0.0333779	0.0261384
Setdb2	1028	0.136473	0.291858	-0.000239106	0.00759443	-0.00775628
Cbl	1175	0.136662	0.292102	-0.00811536	0.0155061	0.0307118
Afdn	1029	0.137261	0.29322	-0.0394538	0.0334121	0.0275999
Epb41l5	1030	0.137476	0.293516	-0.0130797	0.0192368	0.00716803
Col1a2	1129	0.13813	0.29472	0.00413883	0.000601032	0.00793187
Zfp654	1032	0.138193	0.29472	0.00042693	0.0132818	0.00688662
Ppm1m	1180	0.138629	0.295487	-0.00464134	-0.00464366	0.0125093
Rap2b	1034	0.13901	0.296135	-0.00519382	0.0156638	-0.0539771
Upf1	564	0.139148	0.296266	0.0261027	0.0120864	0.000458873
Gm20234	1181	0.139689	0.297253	-0.0112754	-0.00900053	0.00724514
Wdr33	567	0.139969	0.297543	0.0215636	0.0150471	0.00745616
Ehbp1l1	703	0.139979	0.297543	0.00642704	-0.00301713	0.00542936
Fbxl12	1130	0.141125	0.299814	0.00768307	-0.0194365	0.0232743
Nom1	569	0.141675	0.300816	0.0250169	-0.00525774	-0.0512393
Rb1cc1	1037	0.14188	0.301085	-0.0681943	0.0387741	0.00887079
Comp	1038	0.142073	0.30133	-0.0837728	0.0671908	-0.365237
Slc5a9	1187	0.143476	0.304137	-0.0377807	-0.0163055	0.0304529
Dusp14	1041	0.144027	0.305137	-0.0951372	0.0235919	-0.00138886
Emp2	1190	0.144994	0.307017	-0.179674	-0.0170811	0.0281315
Gprasp2	992	0.145235	0.307092	0.00434709	0.00731457	0.00790644
Gm33586	1182	0.145268	0.307092	0.00381516	-0.148876	0.026666
Nfatc2	1045	0.145137	0.307092	-0.013523	0.0165391	0.000989039
Fam160b2	575	0.145594	0.307445	0.0132504	0.00230141	0.00412261
Prc1	1046	0.145586	0.307445	-0.00427916	0.00920268	-0.418875
Aebp1	1047	0.146026	0.308189	0.00384502	0.00810876	-0.0510202
Nipa2	1048	0.146577	0.309181	-0.0352581	0.0272965	-0.0558379
Grk3	1193	0.146723	0.309321	0.00422763	-0.0120798	0.0153793
Rsad1	576	0.146991	0.309547	0.011075	-0.00445346	-0.00811216
Zdhhc18	1049	0.146913	0.309547	-0.0198076	0.0224708	0.000524161
Gm47469	653	0.147393	0.310226	0.00758962	0.0063435	0.00378071
Msl1	1195	0.147644	0.310583	-0.06249	0.0259202	0.0465451
Tat	1196	0.148087	0.311346	-0.00604786	0.004652	0.0108241
Clasp1	1221	0.148291	0.311605	0.00695051	0.0223576	0.0407926
Thrb	1094	0.149113	0.313147	0.00679065	0.00810596	0.0180492
Nfyb	1050	0.149187	0.313147	-0.00307241	0.0252048	-0.00587149
Polg2	728	0.149573	0.31364	0.0113507	-0.0177373	0.0112645
Chst10	578	0.149585	0.31364	0.010906	-0.016708	0.00480636
Zfyve1	1052	0.149733	0.313781	-0.0118946	0.0136128	0.00621723
Lrch3	1053	0.149829	0.313789	0.000848347	0.0172701	0.014374
Nipal1	1054	0.1499	0.313789	-0.0221946	0.00642789	-0.0266453
Fmnl3	634	0.150187	0.31422	0.00804201	0.00650722	-0.0273781
Sirt3	579	0.150312	0.31431	0.0394314	-0.0739613	0.0443026
Gm32036	1202	0.151217	0.316032	-0.0361833	-0.0507916	0.0337518
Slc5a3	580	0.151541	0.316537	0.0333653	-0.0799506	-0.127822
Wfdc17	1211	0.151771	0.316846	-0.0460122	0.0149799	0.00990765
Cdv3	1056	0.152375	0.317935	-0.0843786	0.0385198	-0.0721506
Phlda3	757	0.15281	0.318671	0.0163277	0.0209641	-0.121183
Uspl1	1059	0.153005	0.318905	-0.00114507	0.0164993	-0.0261839
Nedd4	1148	0.153255	0.319253	0.0206957	0.0411912	0.0655347
Rdh12	1205	0.153375	0.319331	-0.00900172	-0.329968	0.0348499
Cbr3	951	0.15435	0.321188	0.00728801	0.00346358	0.0107999
Spty2d1	1208	0.154862	0.322079	-0.0681241	0.016763	0.0386215
Rbm6	1210	0.156131	0.324544	-0.0138448	0.0141943	0.0458739
Oasl1	1065	0.156919	0.326006	-0.0136179	0.00659821	0.000216689
Pard6b	879	0.157597	0.327238	0.00674663	0.00814885	0.0102542
Cyp4v3	1239	0.157772	0.327426	-0.00336194	0.0067102	0.0024271
Gatad2b	1066	0.157988	0.327698	-0.038674	0.0338947	-0.0429489
Fn1	1030	0.158547	0.328681	0.0035523	0.00744967	-0.0115171
Tmem44	1214	0.158844	0.329118	-0.000440486	-0.00446803	0.00940975
Atg16l2	1069	0.159189	0.329657	-0.0240885	0.0155626	0.000892369
Cdc14b	739	0.160347	0.331877	0.0124295	0.0102902	-0.00353573
Rhov	1070	0.160455	0.331922	-0.0309916	0.0163219	0.00498172
Zfp420	589	0.161095	0.333067	0.00707023	-0.000906324	0.00335097
Gm15446	590	0.161456	0.333635	0.0134541	0.000388336	-0.0152533
Apobec3	591	0.161618	0.33379	0.0250585	-0.0586175	-0.0174589
Gm17259	1219	0.161895	0.334184	-0.000105977	-0.00330307	0.0112003
Chac1	1072	0.162009	0.334242	0.00442592	0.0212089	0.00105855
Utp14b	593	0.164258	0.3387	0.00936536	0.00341156	-0.00959675
Csf2ra	894	0.164702	0.339286	0.0119954	0.0126952	0.03022
Eno3	1073	0.164718	0.339286	-0.0044763	0.00801962	0.000820195
Lin54	1074	0.164826	0.339327	0.000393601	0.013449	-0.0744592
Ip6k2	1223	0.164964	0.339431	-0.0770082	-0.0366481	0.0347304
Abraxas2	1078	0.165221	0.339652	0.0101551	0.0274676	-0.00204901
Sertad2	1079	0.165248	0.339652	-0.0312151	0.0408507	-0.0413562
Tbc1d16	1080	0.165823	0.340652	0.00247538	0.0124924	-0.00446487
Irx5	1083	0.166352	0.341557	-0.0407017	0.0427582	0.0270997
Tm9sf1	1026	0.166475	0.341629	0.00569826	0.0096488	0.0113878
Fbxo9	1226	0.167857	0.344281	0.00184727	-0.0975853	0.0266035
Pou2f1	698	0.168727	0.345881	0.0144708	0.0111893	-0.0103569
Hist1h4d	655	0.169167	0.346599	0.0108935	0.0145161	-0.0211691
Aqp5	1229	0.169488	0.347072	-0.385053	-1.27262	0.145445
Srp54a	1230	0.169591	0.3471	-0.0172188	-0.0119111	0.0307113
Col3a1	962	0.169962	0.347675	0.00450392	0.00630362	0.0077618
Wdr20	1085	0.170738	0.349076	0.00757529	0.020204	0.00558528
Ccl2	1233	0.171157	0.349748	-0.0258879	0.000757943	0.00436971
Atp11b	600	0.172177	0.351275	0.0240736	0.0103173	-0.000653274
Yeats2	769	0.172152	0.351275	0.0142242	0.0134689	-0.0488444
Cytip	1089	0.172025	0.351275	-0.00510808	0.00593804	-0.0103919
Epg5	1235	0.172869	0.352499	0.00260981	0.000500059	0.00619532
2010109A12Rik	730	0.173502	0.353604	0.00629948	0.00584897	0.000382216
AW549877	1029	0.174045	0.354523	0.00942456	0.00947065	0.0246876
Gm20554	1241	0.174336	0.35474	0.00426716	-0.0253767	0.0265005
Cic	1091	0.174297	0.35474	-0.0109124	0.0235218	-0.00349615
Tpd52l2	1096	0.175144	0.356197	-0.054514	0.0445301	-0.0765982
Tax1bp1	1099	0.17533	0.356388	-0.097295	0.0482095	-0.074393
Cdyl2	1036	0.175918	0.357394	0.00603827	0.00734904	0.00265634
Zc3h6	603	0.177392	0.360123	0.0172827	-0.0123986	0.00827012
Tmem86a	604	0.177448	0.360123	0.0113813	-0.00965043	0.00856163
Tube1	782	0.17836	0.361785	0.00559529	0.00568967	-0.020434
Chrnb1	1280	0.178708	0.362299	-0.0415919	0.0170231	0.0292132
Sart1	783	0.179633	0.363673	0.0217239	0.0267906	0.00672023
Nmrk1	846	0.179669	0.363673	0.0100146	-0.0116978	0.0156573
Taf15	1100	0.179533	0.363673	-0.0207091	0.0301694	-0.057009
Tet2	724	0.181383	0.366826	0.0193869	0.0161506	-0.036291
Notch2	1102	0.181416	0.366826	0.00296725	0.0204833	-0.00638004
Map7	1112	0.181552	0.366908	-0.0323606	0.0320575	0.037855
Eri2	611	0.182409	0.368448	0.00938547	0.00459541	-0.0183545
Hipk3	1103	0.182643	0.368727	-0.0211028	0.0251599	-0.0310774
Klf16	1137	0.183	0.369255	0.00369592	0.0137768	0.00108576
Zdhhc23	905	0.183499	0.370068	0.0102093	0.00492652	0.0170972
Rps6ka5	940	0.184644	0.372181	0.00538848	0.00793591	0.00741459
Ppic	1105	0.185046	0.372798	0.00399785	0.0168895	-0.195663
Scara5	1256	0.185643	0.373805	-0.0533274	-0.075703	0.0409266
Slc22a5	794	0.18591	0.374147	0.00513405	-0.00255605	0.00856671
Afap1	1262	0.187794	0.377743	-0.0122101	0.0180205	0.025169
Gm14403	619	0.189086	0.380134	0.00753466	0.00419852	0.00367897
Zfp143	948	0.18918	0.380134	0.0055211	0.00760501	0.0122667
Selenoo	716	0.189424	0.380425	0.0196593	-0.0313465	0.0220342
Usp53	620	0.189523	0.380426	0.0191638	-0.00222436	0.0110158
Rad54l2	1109	0.189647	0.380478	0.00362555	0.0122632	-0.00647641
Slc35d3	1260	0.189882	0.38075	-0.0598233	-0.0496144	0.015732
4931406P16Rik	1110	0.190252	0.381295	-0.0296301	0.0289058	0.0114415
Akap7	639	0.191056	0.382708	0.0156244	0.0125544	-0.00254957
Ncoa1	1296	0.191493	0.383383	-0.0193493	0.0179013	0.0317448
Phkg2	812	0.192122	0.383906	0.0226575	-0.00645584	0.0487992
Trmt44	955	0.191897	0.383906	0.00816676	0.00809349	0.00991869
Rai14	1116	0.192152	0.383906	-0.0143456	0.0153309	0.00863253
Foxo3	1113	0.191969	0.383906	-0.0463666	0.026714	-0.0293803
C130074G19Rik	1265	0.192287	0.383977	0.000743679	-0.0175286	0.0154702
Tslp	804	0.192786	0.384485	0.00781494	0.00808198	-0.0040339
Ccdc138	712	0.19279	0.384485	0.00757175	0.00649987	-0.0152028
Pecam1	622	0.19284	0.384485	0.00739424	-0.00182766	-0.000158007
Gnl3	1117	0.193031	0.384666	-0.06026	0.0529673	-0.112203
Usp20	1284	0.193414	0.38523	-0.00133629	0.0117985	0.0148746
Arl6ip1	623	0.193885	0.385731	0.0471325	-0.0203371	-0.0976191
Brpf1	805	0.194065	0.385731	0.013852	0.0159944	0.00384876
Ilvbl	1266	0.194058	0.385731	0.00958048	-0.0188896	0.0329136
Tdrd7	1301	0.193878	0.385731	3.11694e-05	0.0078932	0.00887214
Gm43796	806	0.19418	0.385759	0.00565032	-0.00480635	0.0088495
Atl2	1114	0.194544	0.386284	0.00881706	-0.0212527	0.0189609
Anks3	745	0.194756	0.386507	0.0164972	-0.00868243	0.0189835
Bivm	899	0.195373	0.387532	0.00503525	0.0036195	0.0110529
Elac1	625	0.195618	0.387819	0.00881595	-0.00758348	0.00438665
Entpd1	1269	0.196634	0.389632	-0.04929	-0.0454293	0.0249826
Telo2	626	0.197447	0.391042	0.0180428	-0.0331999	-0.0279822
Gadd45g	814	0.198397	0.392118	0.0244087	-0.0274575	0.0392382
Kat6b	628	0.198376	0.392118	0.0188701	-0.00579968	0.00544648
Gm46404	627	0.198132	0.392118	0.0107355	0.00148218	-0.00588444
Plekha6	969	0.19826	0.392118	0.00621251	0.00734592	0.00964699
Zrsr1	711	0.198529	0.392122	0.0174397	0.0179089	0.00714601
Zcchc14	1308	0.198725	0.392122	-0.00293406	0.0107559	0.0171183
Acad9	1274	0.198686	0.392122	-0.0040744	0.00775263	0.0374675
Dnajc2	1121	0.198805	0.392122	-0.0182792	0.0278847	-0.0985642
Sh3bgr	1277	0.200475	0.395212	-0.00913985	-0.0109395	0.0152845
Pacs1	1278	0.201576	0.397181	-0.0144773	-0.0235286	0.0285787
Eva1b	1279	0.202416	0.398632	-0.168075	-0.204721	0.0560352
Nmb	696	0.203601	0.400557	0.0084757	0.00703883	-0.00955763
Gpcpd1	1126	0.203509	0.400557	-0.0268133	0.0186337	-0.0664579
Col1a1	984	0.20403	0.401197	0.0049738	0.00552269	0.00499446
Prr5	637	0.204295	0.401514	0.0177837	-0.202053	-0.0753782
Mb21d2	1318	0.204446	0.401604	-0.000780847	0.0054102	0.00623576
Kmt2d	638	0.205617	0.403701	0.0206908	0.011242	0.00379171
Ddx23	1127	0.205825	0.403902	-0.0103269	0.0173024	-0.0159843
Dppa1	1283	0.206333	0.404694	-0.00872127	0.00073767	0.00973529
Dlg1	991	0.20703	0.405649	0.0102608	0.0131335	0.0204151
Sdc3	1284	0.20696	0.405649	-0.0616563	-0.0125039	0.0320575
Tfap2c	640	0.207476	0.406317	0.0452989	-0.293844	-0.064224
Cnksr3	1129	0.208367	0.407854	-0.00532581	0.00822477	0.00137048
Tmem50b	1286	0.20864	0.408181	-0.14032	-0.169587	0.0453255
Etohd2	833	0.20922	0.409109	0.00873191	0.00482174	0.0108263
Fam46c	981	0.209744	0.409906	0.00693762	-0.0396109	0.0151647
Slc25a35	1290	0.20984	0.409906	-0.00832155	-0.0506034	0.026791
Mfsd13a	1291	0.210109	0.410223	-0.0362584	0.00615513	0.0204792
Gpr146	1292	0.210498	0.410774	-0.0496524	-0.0542599	0.022725
Hnrnpdl	1134	0.210902	0.411356	-0.0510193	0.0371514	-0.200383
Scgb1c1	1296	0.212055	0.413395	-0.0111445	-0.00937346	0.00618073
Ddx60	1297	0.212172	0.413415	-0.00398313	-0.00369668	0.0120199
Atxn7	1139	0.21316	0.41513	-0.0238023	0.0225566	-0.00242878
Mbnl1	834	0.214083	0.416716	0.0134164	0.0143819	0.00493963
Scgb1b27	825	0.214881	0.41806	0.0169519	0.026037	-0.325333
Serpinb6b	1300	0.215955	0.419936	-0.00880642	-0.00683254	0.00525959
Pi4ka	843	0.216282	0.419972	0.0120606	0.00561586	0.0182937
Dram2	1214	0.2163	0.419972	0.0112559	-0.0175965	0.055878
Cdk5rap2	841	0.216217	0.419972	0.00901944	0.0105102	-0.0609803
Ice2	646	0.216654	0.420448	0.00967271	-0.00201809	0.000581203
Pon3	1303	0.217382	0.42165	-0.0574351	-0.107131	0.0218004
Acss1	1304	0.218483	0.423571	-0.0989567	-0.249778	0.0504478
Polr3gl	1306	0.219917	0.426137	0.00406083	-0.0525446	0.036573
Yod1	1146	0.220337	0.426736	-0.00671925	0.012875	-0.00412725
Dcpp1	1147	0.221307	0.428401	-0.0109334	0.00434905	-0.014511
Tnfrsf23	1148	0.221723	0.42899	-0.00694884	0.0137689	0.0118582
Mid1ip1	651	0.222424	0.429701	0.0185196	-0.00812552	-0.00897695
Sugct	886	0.222293	0.429701	0.00998356	0.00502681	0.0139527
Gls	1309	0.222317	0.429701	0.00552182	0.00257622	0.0338717
Dnajc21	1150	0.222919	0.430225	0.00331596	0.0250033	-0.014349
Fgg	1149	0.222843	0.430225	-0.00898369	0.00543573	0.00301708
[truncated: 1,859 more rows]

## Sheet: 2-AvP 
	Top	p.value	FDR	logFC.1	logFC.3	logFC.4
Tnfrsf12a	1	1.71246e-225	6.60666e-222	0.753312	1.3056	0.45776
Col9a1	1	1.71776e-203	3.31356e-200	1.41575	0.0928928	0.408481
Pxdc1	2	2.0197e-184	2.59733e-181	0.927654	1.21224	0.836932
Pde4b	1	5.5545e-160	5.35732e-157	0.453363	1.03752	0.979934
Cldn7	4	2.0361e-155	1.57105e-152	0.775015	0.97608	0.338363
Tgif1	5	2.61765e-154	1.68315e-151	0.354739	0.85088	0.610294
Fkbp11	2	5.01063e-144	2.76157e-141	1.22292	0.0151112	0.391199
Cldn4	5	7.79489e-144	3.75909e-141	0.625972	1.40358	1.2706
Aldoc	3	1.08962e-143	4.67084e-141	1.41093	-0.191084	1.20926
Wfdc18	4	5.99266e-142	2.31197e-139	1.76787	0.256322	0.705802
Calr	5	4.76344e-137	1.67067e-134	1.09702	0.058697	0.408723
Nme1	6	1.44798e-131	4.65527e-129	0.905648	0.0792803	-0.270473
Sec61b	7	3.55501e-131	1.05502e-128	0.9479	0.0260749	0.434878
Sfn	7	7.4008e-130	2.03945e-127	0.161361	1.06101	0.636463
Cd36	8	2.57531e-127	6.62369e-125	1.04824	-0.0474597	0.648452
Sox4	8	1.23104e-124	2.96833e-122	0.844526	0.983801	0.331781
1110008P14Rik	9	4.56418e-124	1.0358e-121	0.914191	0.152432	-0.0170681
Map2k3	9	1.22541e-117	2.62647e-115	0.326885	0.703044	0.422531
Cxadr	10	5.83097e-112	1.18399e-109	0.235039	0.630239	0.468447
Slc25a5	10	5.56512e-111	1.07351e-108	0.852908	0.0347696	-0.15368
Pdia6	11	4.6792e-110	8.59636e-108	0.899301	0.0645036	0.245925
Ptpn2	11	3.27077e-106	5.73574e-104	0.342288	0.773488	0.706761
S100a10	12	7.19194e-105	1.16578e-102	0.464074	0.768658	0.178024
Manf	12	7.25214e-105	1.16578e-102	0.98258	0.0722109	0.0845621
Csn3	13	1.12091e-102	1.72978e-100	1.37495	0.29233	0.807215
Btg1	13	4.29495e-102	6.37305e-100	0.254382	0.758531	0.616059
Emid1	14	4.88864e-101	6.98532e-99	0.994331	0.0239123	0.513673
Marcksl1	14	4.11768e-97	5.67358e-95	0.71919	0.854541	0.736948
Efhd2	15	6.74139e-97	8.96837e-95	0.260149	0.669492	0.594673
Npnt	15	4.45918e-96	5.7345e-94	0.826276	-0.175649	0.229451
Mfge8	16	9.3139e-96	1.15913e-93	1.43149	0.390256	0.63248
Tm4sf1	16	1.26086e-95	1.52012e-93	0.572912	0.903894	0.991595
Cd14	2	8.0958e-95	9.46473e-93	0.502245	1.04081	1.16743
Mt2	18	6.3083e-94	7.15807e-92	0.524046	1.35354	1.15309
Fam3c	18	9.71522e-93	1.07089e-90	0.730232	0.121558	0.367078
Zfand5	19	4.92564e-92	5.27864e-90	0.478095	0.746981	0.695906
Abcg2	19	1.7384e-90	1.81264e-88	0.597569	0.0498977	-0.1686
Zfp106	20	5.35566e-90	5.43741e-88	0.846788	-0.20747	0.566598
Csn1s2a	21	1.6804e-89	1.6623e-87	2.0517	0.123546	0.673526
Lmna	20	1.14527e-87	1.10461e-85	0.349704	0.703225	0.0718015
Ccnd1	22	1.35276e-87	1.27291e-85	0.670557	-0.103898	-0.338346
Nfkbia	21	1.05104e-86	9.65455e-85	0.166573	1.02107	0.861791
Mt1	22	7.22536e-86	6.48266e-84	0.323733	1.17864	0.989671
Krt8	23	7.60012e-84	6.66392e-82	0.1803	0.695009	0.498805
Duoxa1	23	8.33706e-83	7.14764e-81	0.919896	-0.30812	0.854495
Coq10b	24	2.18439e-82	1.83204e-80	0.181293	0.52209	0.437767
Folr1	24	2.44689e-82	2.00853e-80	0.841765	-0.049355	0.341745
Lcn2	25	3.8697e-82	3.11027e-80	0.534484	0.709313	0.37795
Top1	26	2.85918e-81	2.25117e-79	0.442374	0.677206	0.358801
Anxa6	25	4.19355e-80	3.1723e-78	0.664537	0.108127	0.300412
Litaf	27	4.14235e-80	3.1723e-78	0.17555	0.553996	0.62714
Sbno2	28	1.74899e-79	1.29761e-77	0.00144846	0.74469	0.568933
Lbp	22	2.01373e-79	1.46584e-77	0.872729	0.436533	0.842737
Nucb2	27	2.8794e-78	2.05717e-76	0.724642	0.10631	0.538672
Cd24a	29	3.92818e-78	2.75544e-76	0.372495	0.714246	0.649156
Ostc	28	1.09357e-75	7.53393e-74	0.613814	-0.0508196	-0.00777765
Krt18	30	1.34951e-75	9.13407e-74	-0.255672	0.553964	0.64353
Ppib	29	1.38607e-75	9.21973e-74	0.677109	-0.0300691	0.275105
Klf5	31	1.6695e-75	1.09168e-73	0.181725	0.480557	0.355228
Slc29a1	30	1.83051e-75	1.17702e-73	0.851417	-0.23092	0.0721792
Tmsb4x	31	1.81898e-74	1.15043e-72	0.743656	0.250169	0.631803
Taldo1	32	6.10105e-73	3.79643e-71	0.654391	-0.0395359	0.23077
Olfml3	33	3.30582e-72	2.02442e-70	0.438269	0.0465272	0.0811185
Basp1	32	3.9039e-72	2.35332e-70	0.124335	0.500281	0.405681
Mydgf	34	7.6149e-72	4.51974e-70	0.61088	-0.0451561	0.25386
Hsp90b1	36	2.18276e-70	1.27592e-68	0.721977	0.0276012	-0.0343385
Mdfi	33	2.74012e-70	1.57782e-68	0.147823	0.422068	0.23424
Ndel1	34	2.56459e-69	1.45503e-67	0.265997	0.53103	0.376492
Trf	37	4.96085e-69	2.77376e-67	0.797511	0.0571853	0.770765
Rogdi	39	1.64532e-67	9.06809e-66	0.537908	-0.0858733	0.11841
Acsl4	40	3.69063e-67	2.00542e-65	0.67282	-0.0731828	0.278711
Sdc4	35	1.8038e-66	9.66538e-65	-0.0940286	0.5481	0.3066
Serpina3n	36	2.1447e-66	1.13346e-64	0.191766	0.652803	0.292513
Pdia3	41	2.38953e-66	1.24579e-64	0.653686	0.0781417	0.0923275
4930523C07Rik	37	3.2043e-65	1.64829e-63	0.326858	0.495971	0.340344
Serp1	42	4.74773e-65	2.4101e-63	0.646564	-0.148182	0.128157
Cebpd	38	6.04245e-65	3.0275e-63	-0.0152364	0.926121	0.902565
Uap1	39	2.80292e-64	1.38637e-62	0.366653	0.511736	0.39935
Cmas	43	1.54088e-63	7.52495e-62	0.638905	-0.22722	0.0500705
Plet1	10	5.18457e-63	2.50026e-61	0.284418	0.524009	0.922899
Ubc	41	5.72532e-63	2.72695e-61	0.161204	0.656277	0.619744
Csn1s1	44	3.97721e-62	1.87123e-60	1.47879	0.0222245	0.965209
Phlda1	42	6.95048e-62	3.23072e-60	0.157926	0.681949	0.904807
Sdf2l1	45	1.8213e-61	8.36496e-60	0.508333	-0.0385811	0.112769
Car2	46	4.53979e-61	2.06053e-59	0.576416	0.0665966	-0.358503
Rbm3	47	8.5639e-61	3.8418e-59	0.58712	0.0870047	-0.188561
Igfals	13	8.7842e-61	3.89534e-59	0.571234	-0.172665	0.598905
Tgm1	43	4.0121e-60	1.75894e-58	0.312223	0.429261	0.357679
2010111I01Rik	49	6.70587e-60	2.90688e-58	0.617026	-0.0790124	0.259636
Sphk1	44	2.91404e-59	1.24915e-57	0.284737	0.426972	0.288361
Ptp4a1	45	1.22063e-58	5.17494e-57	0.208884	0.48126	0.358259
Nans	51	1.95032e-58	8.17864e-57	0.543467	-0.101818	0.0713828
Srm	52	4.8892e-58	2.02823e-56	0.49296	-0.0807631	0.0233029
Errfi1	14	8.87055e-58	3.6407e-56	0.301252	0.684224	0.905776
Osmr	47	2.54017e-57	1.03158e-55	0.0163362	0.370094	0.310794
Fblim1	53	2.63449e-57	1.05874e-55	0.607282	-0.273209	-0.106553
Mlec	54	1.80208e-56	7.16743e-55	0.521402	0.112402	0.143869
Lalba	55	5.33809e-56	2.10146e-54	1.11475	-0.477169	0.477486
Pdzk1ip1	4	2.92176e-55	1.1386e-53	0.114255	0.042237	0.650237
Ndufa1	56	3.22301e-55	1.24344e-53	0.513292	0.0737075	0.348451
Rpn2	57	6.08406e-55	2.32399e-53	0.557213	0.122699	0.102693
Thbs1	48	6.93019e-55	2.62124e-53	0.276917	0.580157	0.643784
Sec61g	58	7.85513e-55	2.94224e-53	0.552872	0.0307207	0.0546277
Tmem216	59	9.83316e-55	3.64772e-53	0.473889	-0.194178	-0.24336
Tspan13	60	1.0153e-54	3.7305e-53	0.534336	-0.011461	-0.182171
Tmsb10	61	1.19841e-54	4.36175e-53	0.674018	0.437351	-0.137491
Dynll1	62	1.43798e-54	5.18477e-53	0.612773	0.125885	-0.539533
Tmem51	49	1.96595e-54	7.02279e-53	0.171997	0.342166	0.269095
Bcl3	50	2.90102e-54	1.0268e-52	0.23723	0.42945	0.356586
Scrg1	63	1.45995e-53	5.12043e-52	0.60001	-0.00616476	0.541317
Lman1	64	2.34556e-53	8.15241e-52	0.538452	-0.117515	0.224151
Hspa5	65	2.61676e-53	9.01379e-52	0.679981	0.139405	-0.0529896
Chic2	51	9.68208e-53	3.30562e-51	0.34739	0.440506	0.174616
Ddost	66	1.01355e-52	3.43006e-51	0.545256	-0.0439408	0.234274
Ptpn1	52	1.67889e-52	5.6323e-51	0.174322	0.407732	0.287064
Mast4	53	1.76472e-52	5.8692e-51	0.240823	0.392227	0.312008
Tubb6	54	4.06205e-52	1.33944e-50	0.175107	0.31003	0.0914742
Duox1	67	5.296e-52	1.73152e-50	0.548351	-0.110688	0.52759
Tmed3	51	1.6602e-51	5.38241e-50	0.59909	-0.0702703	0.673802
Pnrc1	7	2.20807e-51	7.09896e-50	0.0759737	0.564283	0.906741
Ramp1	69	4.58355e-51	1.46143e-49	0.712532	0.213098	0.729431
Dusp6	70	5.22568e-51	1.65251e-49	0.680094	0.530531	0.372581
Nf1	71	5.56316e-51	1.74493e-49	0.719198	-0.318444	0.700665
Fdps	72	5.92565e-51	1.84364e-49	0.415622	-0.0122985	-0.320496
Tuba1a	63	7.50247e-51	2.31556e-49	0.525548	0.481591	0.251912
Rassf1	56	1.21328e-50	3.71496e-49	0.101126	0.437196	0.337376
Arrdc4	26	1.22874e-50	3.73266e-49	0.148217	0.498796	0.661851
Stat3	58	1.36849e-50	4.12472e-49	0.0483836	0.444442	0.419396
Sec11c	75	3.33641e-50	9.97819e-49	0.557202	-0.111557	0.278946
Nes	76	3.56021e-50	1.05656e-48	0.537453	0.31288	-0.103809
Cdc42ep3	59	4.57116e-50	1.34622e-48	0.335103	0.49295	0.480248
Ier5	60	6.45105e-50	1.88547e-48	-0.0265786	0.494453	0.441186
Erp29	77	8.41803e-50	2.44186e-48	0.480091	-0.0116624	-0.125578
Rcan1	39	9.36341e-50	2.69582e-48	0.342172	0.579813	0.619898
Gch1	62	1.27703e-49	3.64948e-48	0.0719582	0.273539	0.116382
Fabp5	77	1.21448e-48	3.4452e-47	0.888074	0.721985	0.692598
Tspan3	79	2.27306e-48	6.40107e-47	0.524553	-0.0458987	0.215444
Crb3	64	4.06358e-48	1.13604e-46	0.2543	0.406468	0.352487
Hnrnpa1	80	5.20669e-48	1.44514e-46	0.524193	0.137166	-0.222424
AC168977.1	81	6.60477e-48	1.82009e-46	0.521094	-0.029899	0.263273
Hsp90aa1	65	8.35783e-48	2.28685e-46	0.0880334	0.475621	-0.486823
Uqcrq	82	1.44025e-47	3.91301e-46	0.493321	0.0216804	-0.289009
Tceal9	83	2.28598e-47	6.16734e-46	0.553698	0.161358	-0.0913623
Slc35b1	84	3.45821e-47	9.26513e-46	0.35559	0.0420741	-0.0473889
Slc25a39	85	4.19587e-47	1.11639e-45	0.460535	0.0976448	-0.0158477
Klf6	66	5.05533e-47	1.33585e-45	-0.00376999	0.555408	0.49778
Ets2	67	6.55594e-47	1.7206e-45	0.117738	0.318763	0.331245
Bcl2l14	6	8.42573e-47	2.19638e-45	0.725458	0.564359	1.05264
Runx1	8	3.54225e-46	9.17181e-45	-0.054538	0.243143	0.500215
Cnn3	66	4.54917e-46	1.17005e-44	0.389433	0.436659	0.494037
Arid5b	69	1.86981e-45	4.77731e-44	0.154396	0.353431	0.353028
Pik3r1	9	1.90349e-45	4.83137e-44	0.0660781	0.233755	0.962554
Ywhag	70	4.75552e-45	1.19914e-43	0.211019	0.34197	-0.00212653
Ralgds	71	6.7855e-45	1.6999e-43	0.116506	0.363875	0.241916
Efhd1	87	3.60458e-44	8.97192e-43	0.421657	0.0604236	0.308908
Sec13	88	4.85113e-44	1.19972e-42	0.349797	0.0347804	-0.0239753
Fkbp2	89	5.30532e-44	1.30369e-42	0.474608	0.0263304	-0.0949429
Ppa1	90	5.62598e-44	1.37374e-42	0.338665	0.11342	-0.0919255
Ctnnbip1	91	2.7055e-43	6.56466e-42	0.432661	-0.0552914	0.0408374
Tagln2	72	7.12546e-43	1.71813e-41	0.393548	0.414104	-0.412914
Sod2	11	9.56126e-43	2.29114e-41	0.194889	0.350378	0.754401
Jund	73	1.39155e-42	3.31396e-41	-0.11692	0.460913	0.478489
Psmb3	92	1.64118e-42	3.88447e-41	0.457077	0.0235934	-0.187759
Tubb2a	74	1.95678e-42	4.6032e-41	0.423975	0.42876	0.236563
Chn2	93	2.01552e-42	4.71265e-41	0.35673	-0.100069	0.117999
Myl12a	94	3.48216e-42	8.09287e-41	0.515605	0.330533	0.289391
Rhoc	75	7.42137e-42	1.71447e-40	0.181112	0.444626	0.412373
Deptor	95	8.03605e-42	1.84542e-40	0.504322	-0.193816	0.368434
Spcs2	96	9.17441e-42	2.09437e-40	0.484677	-0.103116	0.142645
Rwdd1	97	9.70875e-42	2.20332e-40	0.413167	0.00690573	-0.177329
Tuba1c	76	1.06905e-41	2.41193e-40	0.348592	0.471033	0.0527232
Smpdl3a	15	4.90349e-41	1.09986e-39	-0.0438511	-0.0409978	0.680767
Smdt1	98	5.49587e-41	1.22561e-39	0.44183	-0.00743016	-0.00961936
Hnrnpa2b1	99	8.60832e-41	1.90867e-39	0.473028	0.0175042	-0.442549
Gdpd3	16	1.05138e-40	2.31785e-39	-0.2186	0.0152651	0.486146
S100a16	100	1.10072e-40	2.41284e-39	0.491932	0.241334	0.412043
Chil1	78	1.15121e-40	2.50924e-39	0.12476	0.663715	0.664632
Tmem37	101	1.23379e-40	2.67414e-39	0.443097	-0.247421	-0.400005
Trim47	80	1.51202e-40	3.25887e-39	0.0926978	0.24615	0.137836
Zc3h12a	81	3.75916e-40	8.05714e-39	0.0705173	0.247611	0.155461
Emp1	82	4.7846e-40	1.01983e-38	-0.0787115	0.292457	0.124887
Nfkb1	83	5.72639e-40	1.21387e-38	0.129455	0.296389	0.190114
Ormdl2	102	6.85968e-40	1.44114e-38	0.409583	-0.00926494	0.0382867
Trim46	103	6.87323e-40	1.44114e-38	0.434682	-0.279077	-0.0406239
Rela	84	7.51779e-40	1.56776e-38	0.121177	0.292695	0.21674
Anxa1	85	1.0785e-39	2.23703e-38	0.234976	0.423866	0.334125
Txnrd1	86	2.20511e-39	4.54937e-38	0.0624404	0.330646	0.0593354
Pmvk	104	3.02462e-39	6.20691e-38	0.400185	0.129337	0.169807
Pink1	17	3.13409e-39	6.39753e-38	0.16226	0.0824082	0.586958
Rpn1	105	3.23766e-39	6.57415e-38	0.371606	0.00157142	-0.00688585
Cnp	106	6.23428e-39	1.25926e-37	0.30626	-0.0522804	0.0438487
Rbp1	107	7.43664e-39	1.4943e-37	0.727484	0.208705	0.440167
Cp	20	1.26699e-38	2.53266e-37	0.570712	0.560845	0.764166
Iqgap1	88	2.88189e-38	5.7311e-37	0.189765	0.360494	0.244625
Bzw2	89	2.98471e-38	5.90514e-37	0.217304	0.385884	0.246248
Eif1a	90	4.81987e-38	9.48727e-37	0.226766	0.347651	0.330914
Cldn3	91	9.94752e-38	1.9481e-36	0.365153	0.399945	0.468975
Anp32b	108	1.23037e-37	2.39736e-36	0.473505	0.245578	-0.573673
Atf4	92	1.30694e-37	2.53376e-36	0.11537	0.429631	0.326376
Btn1a1	109	2.74052e-37	5.28646e-36	0.375242	-0.0654874	0.335184
Hcar2	32	4.40128e-37	8.44784e-36	0.0978765	0.217047	0.204421
Arpc1b	98	4.98291e-37	9.51687e-36	0.502057	0.451138	-0.0277065
Rtn4	94	5.64227e-37	1.07231e-35	0.273712	0.371516	0.332258
Ocln	95	6.27238e-37	1.18622e-35	0.14789	0.223479	0.161331
Maff	96	1.39157e-36	2.61888e-35	-0.00325249	0.258275	0.109597
Gadd45b	50	1.79712e-36	3.36567e-35	-0.0719839	0.474702	0.48623
Kctd1	45	2.10685e-36	3.92668e-35	0.452384	0.359167	0.575795
Morf4l2	113	3.91613e-36	7.26366e-35	0.409643	0.159434	0.0542854
P4hb	114	4.54182e-36	8.3839e-35	0.452993	0.109666	0.000813895
Cdc42ep4	99	4.78767e-36	8.79563e-35	0.125678	0.316597	0.315207
Msn	100	6.06978e-36	1.10982e-34	0.0795611	0.246505	0.127987
Anpep	18	9.90656e-36	1.80281e-34	0.142602	0.0724095	0.455698
Sdhb	115	1.00139e-35	1.81378e-34	0.405402	-0.126781	0.0436331
Ceacam10	116	1.07518e-35	1.93834e-34	0.478617	0.276901	0.201571
Las1l	101	1.0824e-35	1.94228e-34	0.154724	0.319285	0.227076
Spag5	117	1.28309e-35	2.29173e-34	0.305362	-0.216291	0.0514018
Apoc1	19	1.4173e-35	2.51978e-34	-0.517729	-0.162602	0.769399
Ctsh	23	1.7392e-35	3.0779e-34	0.462607	0.0691975	0.697635
Anxa2	102	1.83741e-35	3.23686e-34	0.25579	0.407899	0.406629
Tmem258	119	1.91105e-35	3.35129e-34	0.418039	0.0183064	0.312533
Lypd3	103	2.85071e-35	4.97648e-34	0.0485481	0.22627	0.0860703
Relb	104	2.9166e-35	5.06857e-34	0.0586682	0.200745	0.197687
Clu	21	3.54481e-35	6.13269e-34	0.659852	0.530343	1.21405
Tubb5	120	3.72648e-35	6.4182e-34	0.418356	0.25706	-1.23105
Timm10b	121	4.78722e-35	8.20848e-34	0.388807	-0.0694875	-0.106207
Cycs	122	9.22046e-35	1.57401e-33	0.441071	0.151233	-0.483497
Desi1	105	1.10111e-34	1.8714e-33	0.213595	0.297279	0.231881
Alkal2	124	1.23487e-34	2.08954e-33	0.503652	-0.287435	0.152649
H13	125	1.64235e-34	2.76689e-33	0.43462	-0.0386304	0.337332
Ccnl1	106	1.70963e-34	2.86772e-33	-0.0391434	0.318775	0.2255
Lpgat1	107	2.11535e-34	3.53292e-33	0.351916	0.339576	0.325693
Snap23	121	2.19428e-34	3.64894e-33	0.341209	0.0108513	0.318059
Sulf2	127	3.41175e-34	5.64915e-33	0.356093	0.025723	0.0667271
Tspan8	24	7.99844e-34	1.31872e-32	0.349881	0.0161684	0.923602
Rhob	110	9.15517e-34	1.50301e-32	0.337467	0.447223	0.4871
Map1lc3a	71	1.25118e-33	2.04535e-32	0.458699	0.00463713	0.556076
Itpkc	111	1.3474e-33	2.19336e-32	0.0399138	0.207899	0.128182
Igfbp5	27	1.90219e-33	3.08346e-32	-0.297016	0.0159299	1.13312
Eif3j2	112	2.00734e-33	3.24029e-32	0.165772	0.328361	0.145915
Uqcc2	129	2.12435e-33	3.4149e-32	0.389147	-0.00125538	-0.227012
Gale	130	4.13968e-33	6.62693e-32	0.245189	-0.0768004	0.021537
Rap1b	113	4.21675e-33	6.7224e-32	0.261166	0.344322	0.272373
Mbp	30	4.54136e-33	7.21011e-32	0.116152	0.236787	0.310953
Ucp2	131	4.68892e-33	7.41387e-32	0.434563	0.0918758	0.271859
Ptgr1	132	5.66511e-33	8.92082e-32	0.22636	0.0426671	-0.0313832
Surf4	133	5.83368e-33	9.14892e-32	0.392068	-0.00601623	0.133855
Col11a1	134	6.43348e-33	1.00487e-31	0.37554	0.111045	-0.493463
Dhrs1	135	7.74133e-33	1.20428e-31	0.373871	0.0506358	0.232133
Kcnk1	136	8.49918e-33	1.31686e-31	0.431329	-0.198109	0.0408332
Bcl10	115	9.49793e-33	1.46572e-31	0.123502	0.289493	0.213836
Ada	137	1.06593e-32	1.63839e-31	0.212244	0.0367896	-0.0947488
Ran	138	1.12848e-32	1.72765e-31	0.415789	0.112933	-1.13042
Shf	139	1.3978e-32	2.13151e-31	0.536049	-0.515571	-0.184231
St3gal5	140	1.53685e-32	2.33431e-31	0.356045	-0.0710007	0.235855
Scd1	29	2.56845e-32	3.88591e-31	0.491263	0.162871	0.94133
Birc3	116	2.63029e-32	3.96393e-31	0.0868669	0.249475	0.185367
Adig	31	3.25226e-32	4.88219e-31	0.183212	-0.0694864	0.682957
Dst	141	3.49411e-32	5.22491e-31	0.39389	0.215634	0.287672
Vdr	33	4.08223e-32	6.08078e-31	0.166196	0.189763	0.282768
Tlr2	117	6.25506e-32	9.28155e-31	0.120138	0.1987	0.151067
Lamp2	34	6.33546e-32	9.36483e-31	0.0485605	0.197888	0.522952
Creld2	142	7.0293e-32	1.03508e-30	0.312603	0.0283797	-0.0740061
Phgdh	143	7.63915e-32	1.1206e-30	0.265792	-0.00706808	-0.419905
Serinc2	144	9.53756e-32	1.39378e-30	0.332706	0.152213	0.131327
Psma4	146	1.22461e-31	1.78285e-30	0.396547	-0.145686	-0.151526
Baz1a	119	1.63526e-31	2.37174e-30	0.0544138	0.203056	0.012717
Capg	147	2.07434e-31	2.9973e-30	0.412468	0.163412	0.404751
Prss22	120	2.71035e-31	3.89152e-30	0.1879	0.24558	0.0670368
Tpd52l1	148	2.71337e-31	3.89152e-30	0.382903	-0.214512	-0.0082166
Slco2a1	149	3.22812e-31	4.61263e-30	0.403026	-0.0259508	0.31033
Smox	121	3.58345e-31	5.10146e-30	0.26754	0.253099	0.231494
Nupr1	38	5.96544e-31	8.46127e-30	-0.291502	0.0282412	0.783518
Trib1	122	6.87644e-31	9.71769e-30	0.150365	0.35064	0.21927
Dnajb11	150	7.39298e-31	1.04095e-29	0.324293	-0.00970967	-0.0680427
Slc35a1	151	7.89238e-31	1.10723e-29	0.365343	-0.165833	0.204146
Qsox1	41	1.35141e-30	1.88904e-29	0.230122	0.10257	0.717966
Idh3a	153	1.40642e-30	1.95883e-29	0.329025	-0.0404742	-0.220523
Efna1	123	1.55562e-30	2.15884e-29	0.0413814	0.272539	0.244416
Ddah1	155	1.73132e-30	2.39406e-29	0.249065	-0.00599249	-0.100433
Myo1e	42	2.3474e-30	3.23439e-29	0.137685	0.242622	0.352764
Ier3	124	2.41565e-30	3.31658e-29	0.482425	0.620418	0.767129
Arf6	125	2.46172e-30	3.36784e-29	0.0957579	0.29794	0.156573
Jun	126	2.50376e-30	3.41326e-29	-0.222421	0.525437	0.504879
Dnaja1	127	3.5942e-30	4.88254e-29	0.271664	0.351157	0.171855
4931406C07Rik	159	7.11908e-30	9.63698e-29	0.412935	0.00603397	0.0424502
Abhd14b	44	7.75413e-30	1.04599e-28	0.00574537	-0.085377	0.388669
Abracl	160	9.86672e-30	1.32634e-28	0.378741	-0.0625458	0.00812039
Uchl3	161	1.18813e-29	1.5916e-28	0.328991	0.0900032	-0.247616
Tmem173	162	1.23475e-29	1.64833e-28	0.182254	0.132197	0.151206
Snx17	74	1.37274e-29	1.82046e-28	0.402568	0.167038	0.483131
Atf3	128	1.37313e-29	1.82046e-28	-0.189425	0.525307	0.341851
Nudt4	164	1.45302e-29	1.91978e-28	0.411616	0.034653	0.0685868
Got1	165	1.93311e-29	2.54537e-28	0.352003	0.10615	0.336428
Nipal2	166	2.09393e-29	2.74775e-28	0.357445	0.156279	0.208679
Gadd45a	46	3.83631e-29	5.01711e-28	0.148898	0.234712	0.451678
Ywhah	130	5.33141e-29	6.94884e-28	0.302701	0.328433	-0.123157
Acpp	49	6.12607e-29	7.95771e-28	-0.0615007	0.0432453	0.185947
E030013I19Rik	168	6.33033e-29	8.19544e-28	0.208407	0.0516651	0.0583485
Zfp655	131	7.24442e-29	9.34748e-28	0.114441	0.219383	0.212631
2610524H06Rik	169	8.04015e-29	1.03396e-27	0.234651	-0.000950539	-0.40027
Blcap	132	1.03488e-28	1.32644e-27	0.0955608	0.218709	0.169506
Cldn1	133	1.4174e-28	1.81071e-27	0.101019	0.20612	0.0904892
Me1	170	1.43204e-28	1.82337e-27	0.41172	0.118104	0.267144
Itgb5	60	1.85894e-28	2.35914e-27	0.355538	0.00885143	0.470591
Sh3glb1	134	2.03142e-28	2.56958e-27	0.222837	0.306916	0.167594
Cdh1	135	2.1805e-28	2.74914e-27	0.130639	0.248077	0.131472
Hnrnpab	172	2.18916e-28	2.75107e-27	0.377758	0.129836	-0.597538
Tubb2b	136	2.3948e-28	2.99972e-27	0.156953	0.192991	0.008214
Tbcc	137	2.62961e-28	3.28318e-27	0.183498	0.256195	0.223019
Tmed5	138	2.94788e-28	3.66868e-27	0.197301	0.244859	0.107583
Lyzl4	55	4.67668e-28	5.80148e-27	-0.139594	-0.0870029	0.305679
Dhrs4	173	5.71096e-28	7.06182e-27	0.3293	-0.0346971	-0.130886
Ctsz	174	5.74947e-28	7.08673e-27	0.368606	0.101739	0.185699
Fermt2	176	7.54433e-28	9.26944e-27	0.415381	0.0690529	0.327428
Ehd4	139	1.01455e-27	1.24258e-26	0.243798	0.323315	0.31528
Xdh	57	1.14202e-27	1.39428e-26	0.230942	0.185022	0.491861
Serpinh1	179	1.67487e-27	2.03837e-26	0.353388	0.0374921	0.0338824
Nrip1	140	3.34921e-27	4.06329e-26	0.108736	0.215203	0.178177
Tjp2	141	3.67463e-27	4.44411e-26	0.140549	0.188554	0.14438
2810474O19Rik	142	4.24272e-27	5.11513e-26	0.137037	0.238775	0.161222
Hsd17b12	180	4.50581e-27	5.41539e-26	0.309006	-0.0195542	-0.0950824
Spint1	143	5.60234e-27	6.71237e-26	0.156209	0.224449	0.173058
Dnajc3	181	6.22791e-27	7.41881e-26	0.362494	0.0429598	0.144789
Orai1	182	6.23041e-27	7.41881e-26	0.330703	0.0939239	0.128159
Pqlc1	61	8.78226e-27	1.04252e-25	0.395682	0.310947	0.682188
Glb1	62	1.48719e-26	1.75999e-25	0.310886	0.00576493	0.437265
Bag3	145	1.74003e-26	2.05291e-25	0.0921947	0.21614	0.209887
H2-Q4	146	2.02567e-26	2.38263e-25	0.0815559	0.356221	0.221997
Nhp2	185	2.35281e-26	2.75901e-25	0.335333	0.151485	-0.349458
Dtymk	186	2.91856e-26	3.41206e-25	0.267782	0.00204814	-0.618038
Hlf	187	4.27641e-26	4.98441e-25	0.304363	0.0395394	0.209977
Selenop	63	4.45517e-26	5.17712e-25	-0.126939	-0.0530378	0.504126
C530043A13Rik	64	4.54292e-26	5.26324e-25	0.121628	-0.00430586	0.747492
Lsm4	188	4.70622e-26	5.4361e-25	0.336712	-0.0357618	-0.271716
Malat1	147	6.02486e-26	6.93848e-25	-0.63732	0.402752	0.777434
Cenpx	189	6.44537e-26	7.40067e-25	0.338361	-0.0607462	-0.308878
Eif5	148	6.7077e-26	7.67902e-25	0.0650756	0.318775	0.0433148
Mcl1	149	6.731e-26	7.6829e-25	0.184846	0.272216	0.236049
Chmp4b	150	7.1666e-26	8.15597e-25	0.22001	0.298077	0.283547
Tcn2	99	9.33273e-26	1.05899e-24	0.420993	-0.114782	0.520891
Tnfrsf21	67	9.86572e-26	1.11619e-24	0.119807	0.0797618	0.260086
H2-D1	68	1.0104e-25	1.1398e-24	0.218067	0.028072	0.861717
Fam210b	192	1.52251e-25	1.7125e-24	0.285368	-0.0314457	0.14042
Ezr	132	1.56815e-25	1.7587e-24	0.27221	0.331718	0.402432
Cltb	152	1.66451e-25	1.86136e-24	0.171774	0.303407	0.0845814
Plin2	72	1.84161e-25	2.05344e-24	-0.0910913	-0.305402	0.650274
Skil	153	2.45698e-25	2.73171e-24	0.113519	0.238756	0.15831
Ogfrl1	193	2.46894e-25	2.73712e-24	0.415683	-0.0392219	0.348832
Cst3	195	3.34862e-25	3.70171e-24	0.448852	0.0397419	0.0266335
Etnk1	73	4.06325e-25	4.47886e-24	0.175572	-0.335642	0.558718
Rnf125	155	6.86115e-25	7.54141e-24	0.065807	0.148545	0.137533
Srpr	75	8.56559e-25	9.38808e-24	0.201624	0.0714376	0.438569
Mrps28	196	1.05171e-24	1.14943e-23	0.274164	-0.0245099	-0.222423
Enho	76	1.07088e-24	1.16708e-23	-0.268717	-0.417297	0.439602
Hspb1	156	1.10679e-24	1.20281e-23	-0.453672	0.472381	0.364674
Cd177	197	1.54708e-24	1.67658e-23	0.138797	0.0524839	-0.00967618
Ppdpf	198	1.69214e-24	1.82865e-23	0.354729	-0.125506	-0.0566292
Icam1	159	1.74745e-24	1.88315e-23	0.0828255	0.240926	0.151916
Stk39	199	1.78295e-24	1.91606e-23	0.352493	-0.0883362	0.0409187
Lhfp	200	1.90524e-24	2.04179e-23	0.244359	-0.0720572	0.0406274
Rsrp1	77	1.92774e-24	2.06017e-23	-0.198585	0.0561366	0.490064
Itm2c	78	2.1621e-24	2.30425e-23	0.341464	0.0442114	0.498447
Plscr1	160	2.27011e-24	2.4127e-23	0.17004	0.194336	0.0336498
Tmem238	202	2.44265e-24	2.58894e-23	0.329766	-0.0450859	-0.131456
Socs5	161	3.00003e-24	3.171e-23	0.130293	0.218631	0.204439
Fah	203	3.52761e-24	3.71844e-23	0.272922	0.00509872	0.210596
F3	81	3.75411e-24	3.93637e-23	0.220918	0.274349	0.512912
Mxd4	82	3.75475e-24	3.93637e-23	0.222902	-0.00785055	0.384751
Use1	83	4.2522e-24	4.44579e-23	-0.279468	0.0598708	0.510236
Marveld2	162	6.16418e-24	6.42741e-23	0.133642	0.189181	0.123685
Odc1	204	6.37208e-24	6.62628e-23	0.279094	0.204332	-0.00997918
Slc50a1	205	6.81424e-24	7.06703e-23	0.284221	-0.0400839	0.0773034
Nav2	163	6.91536e-24	7.15266e-23	-0.00807571	0.123936	0.0874827
Elf1	164	8.7844e-24	9.06156e-23	0.0819516	0.250267	0.175957
Ube2f	86	1.22009e-23	1.25523e-22	0.208075	0.218125	0.424623
Kras	165	1.26002e-23	1.29286e-22	0.214905	0.250883	0.0493606
Ank	88	2.21209e-23	2.26373e-22	-0.0154777	-0.0293732	0.27333
Pdap1	207	2.33011e-23	2.37819e-22	0.326234	-0.0226283	-0.431665
Hbegf	166	2.44498e-23	2.48884e-22	0.103339	0.235743	0.0109254
Urah	90	2.75175e-23	2.79376e-22	0.311083	0.0163261	0.536994
Rnf19b	167	3.38164e-23	3.42425e-22	0.044385	0.158515	0.152609
Csn2	209	4.47929e-23	4.52385e-22	0.759469	0.224654	0.318451
Mrpl57	210	5.10089e-23	5.13818e-22	0.296902	-0.0955373	-0.386716
B2m	91	6.09055e-23	6.11623e-22	0.156019	-0.0346889	0.946607
Cttnbp2nl	168	6.11741e-23	6.11623e-22	0.0248552	0.163537	0.066144
Iigp1	211	6.1194e-23	6.11623e-22	0.318161	0.127111	0.126767
Cisd1	212	6.21622e-23	6.19694e-22	0.286967	-0.165779	-0.263645
Hdlbp	213	6.39971e-23	6.36342e-22	0.333752	0.247879	0.287265
Anxa5	214	8.41576e-23	8.34653e-22	0.2939	0.0776876	0.0908021
Canx	215	8.72344e-23	8.6295e-22	0.312453	0.0369671	0.0304159
Ovol1	169	9.07284e-23	8.95218e-22	0.0715569	0.134484	0.0887332
Fam174b	216	1.11811e-22	1.10042e-21	0.303072	-0.132406	0.266495
Bcl2l11	170	1.19336e-22	1.1715e-21	0.017942	0.177543	0.138695
Fam213a	92	1.20038e-22	1.1754e-21	0.163194	-0.0463035	0.415847
Flrt3	217	1.25158e-22	1.21952e-21	0.191367	-0.0180375	-0.0643318
Asns	218	1.25176e-22	1.21952e-21	0.22459	0.0725891	0.042361
Ahnak	171	1.36614e-22	1.3276e-21	-0.131488	0.160288	0.131773
Arg1	94	1.51442e-22	1.468e-21	0.42975	-0.20697	0.844886
Mia	219	1.54922e-22	1.49796e-21	0.434255	0.0718125	0.270146
Nedd9	172	1.5652e-22	1.50964e-21	-0.00721114	0.242636	0.148976
Ddx3x	173	1.66414e-22	1.60106e-21	0.0865032	0.27512	0.164807
Sod3	95	1.86637e-22	1.79116e-21	0.0918347	-0.0391485	0.351896
App	96	1.91623e-22	1.83444e-21	0.134576	0.231561	0.460428
Camkk2	220	1.93246e-22	1.84541e-21	0.234259	0.0154177	0.0686014
Nectin2	174	2.42476e-22	2.30981e-21	0.12496	0.242922	0.261337
Sertad1	175	2.59287e-22	2.46387e-21	0.067979	0.165506	0.0952319
Cnih4	221	2.75134e-22	2.60803e-21	0.283089	0.209103	-0.169122
Csn1s2b	222	2.95543e-22	2.79462e-21	0.358566	0.165807	0.133466
Slc20a1	176	3.39008e-22	3.19778e-21	0.122573	0.238307	0.0580217
Cd63	97	3.43563e-22	3.23284e-21	-0.147808	0.281494	0.594123
Hnrnpa3	223	4.45727e-22	4.18398e-21	0.313045	0.00723164	-0.630726
Sumo3	224	4.49606e-22	4.21014e-21	0.302942	-0.208911	-0.296623
Eif5b	177	4.8487e-22	4.52937e-21	0.192749	0.288089	0.128138
Ogt	98	6.40089e-22	5.96489e-21	-0.175075	0.0475607	0.399323
Arfgap3	226	9.79053e-22	9.10165e-21	0.26939	0.0575146	0.0877463
Midn	178	1.16049e-21	1.07625e-20	0.0504548	0.199385	0.169826
Jmjd1c	179	1.37113e-21	1.26553e-20	0.00642089	0.256169	0.193886
Dnajb1	180	1.37116e-21	1.26553e-20	0.0478605	0.287224	0.178624
Pycr2	227	1.679e-21	1.54596e-20	0.312307	-0.17518	-0.0630778
Limch1	228	1.7626e-21	1.61908e-20	0.199503	-0.0180693	-0.136998
Ncoa7	206	1.94868e-21	1.78575e-20	0.213957	0.20605	0.0196472
Ypel3	104	2.21949e-21	2.02909e-20	-0.373034	-0.142904	0.409993
Pycard	230	2.44325e-21	2.22838e-20	0.295439	-0.194221	-0.169555
Car6	106	3.28586e-21	2.98982e-20	-0.368092	-0.41058	0.902334
Ifitm3	231	3.63645e-21	3.30104e-20	0.431106	0.327375	-0.0473426
Creb5	182	3.76935e-21	3.41365e-20	0.128113	0.193192	0.0763274
Ptbp3	183	3.79946e-21	3.43286e-20	0.090582	0.208235	0.111352
Mtss1	233	4.3034e-21	3.87909e-20	0.396783	-0.0446571	0.162162
Elovl1	107	4.33094e-21	3.89482e-20	0.144588	0.0719408	0.368439
BC005561	184	4.71845e-21	4.23344e-20	0.099526	0.197534	0.0392417
Pycr1	234	4.73217e-21	4.2359e-20	0.204077	-0.0609624	0.0759119
Slc6a14	185	5.05169e-21	4.51144e-20	0.109088	0.169905	0.128389
Nfil3	116	6.2528e-21	5.5712e-20	0.132667	0.167914	0.213373
Sqstm1	187	6.38361e-21	5.67464e-20	0.0323	0.2795	0.227622
Rbms1	188	7.12678e-21	6.32072e-20	0.130012	0.207171	0.082623
Afap1l1	235	7.43851e-21	6.58206e-20	0.210938	-0.135349	-0.0412659
Cd1d1	119	7.83227e-21	6.91462e-20	0.223273	0.0244767	0.232415
Cd200	109	1.00709e-20	8.87071e-20	0.260197	0.236992	0.429214
Ggh	110	1.04737e-20	9.20444e-20	0.177339	-0.0510435	0.420709
Tinagl1	237	1.27728e-20	1.11994e-19	0.293234	-0.0273243	0.171942
Hspe1	238	1.43386e-20	1.25439e-19	0.342865	0.0339922	-0.427416
Bin1	239	1.43881e-20	1.25587e-19	0.313401	-0.0852395	0.250689
Pdlim5	190	1.44974e-20	1.26255e-19	0.08666	0.161715	0.136404
Ppp1cc	192	1.9626e-20	1.70534e-19	0.247439	0.277496	0.314934
Tesc	240	2.01735e-20	1.74897e-19	0.417626	-0.168143	0.0550956
Rin2	193	2.23079e-20	1.92968e-19	0.0496716	0.23115	0.210991
Rab17	112	2.90185e-20	2.50455e-19	-0.140957	-0.119874	0.242472
Scd2	241	3.71023e-20	3.19511e-19	0.307744	-0.138922	-0.03451
Myo1b	194	3.77632e-20	3.24478e-19	0.145802	0.144545	0.0341556
Crem	196	4.27053e-20	3.66127e-19	0.220049	0.203144	0.203537
Sat1	195	4.7926e-20	4.09975e-19	0.13183	0.369914	0.444311
Bzw1	197	5.05508e-20	4.31471e-19	0.172952	0.231999	-0.0537276
Cxcl16	198	5.06875e-20	4.31683e-19	0.0516237	0.148185	0.0976561
Pbk	242	5.40231e-20	4.59078e-19	0.156469	-0.0423385	-1.2339
Gm8797	243	6.26248e-20	5.31004e-19	0.347733	0.231742	0.351756
Cldn8	244	7.54477e-20	6.38327e-19	0.145606	-0.0507095	0.0661838
Tuba1b	246	8.90838e-20	7.52047e-19	0.321996	0.119019	-1.46009
Irx1	114	1.20681e-19	1.01657e-18	-0.0165005	0.0783121	0.408538
Magt1	249	1.35311e-19	1.13732e-18	0.244808	0.0114617	0.0995534
Stat5a	115	1.53242e-19	1.28523e-18	0.103307	0.0214985	0.276326
Ell2	199	1.65055e-19	1.38131e-18	0.204293	0.201679	0.138842
Neat1	200	1.8107e-19	1.51206e-18	-0.345234	0.358887	0.419671
Rrbp1	252	1.85873e-19	1.54881e-18	0.339707	0.195523	0.114723
Selenos	253	2.23314e-19	1.85678e-18	0.309569	-0.144004	0.240487
Mafg	201	2.30202e-19	1.90993e-18	0.0670097	0.203462	0.108946
Lpp	254	2.39158e-19	1.97998e-18	0.235721	0.0729763	0.151885
Nop58	202	3.13133e-19	2.58687e-18	0.148451	0.290274	-0.0321401
Ano1	118	3.62209e-19	2.9859e-18	0.236123	-0.16185	0.430512
Stk40	203	4.31979e-19	3.55346e-18	0.119995	0.201651	0.224446
Perp	255	4.52318e-19	3.71286e-18	0.290306	0.0192183	0.0785356
Hipk1	204	4.63126e-19	3.7935e-18	0.0852833	0.170129	0.153927
Mpc1	256	4.92672e-19	4.02697e-18	0.304841	0.0389521	0.206187
Lad1	257	4.96306e-19	4.04809e-18	0.202899	0.0728638	-0.0900824
Socs2	122	5.09803e-19	4.14941e-18	0.265816	-0.0150315	0.506616
Ak2	259	7.1099e-19	5.77474e-18	0.28361	0.160808	-0.147415
1700025G04Rik	125	7.19874e-19	5.83461e-18	0.170427	0.171982	0.263923
Ndrg1	205	7.59382e-19	6.14192e-18	-0.232982	0.206536	0.263128
Hcfc1r1	126	8.14705e-19	6.57559e-18	0.0720201	-0.0549817	0.484529
Smim14	260	1.0137e-18	8.16461e-18	0.313172	-0.15346	0.280802
Klf9	127	1.26024e-18	1.01292e-17	-0.117299	0.00271371	0.307273
Prdx4	261	1.50357e-18	1.20598e-17	0.290306	0.0473544	-0.278184
Csad	262	1.67793e-18	1.34304e-17	0.274347	-0.0909102	0.0999546
Smim3	159	1.77143e-18	1.41494e-17	0.0283574	0.14006	0.147451
Gfra4	263	1.83859e-18	1.46555e-17	0.0867761	-0.00849694	-0.0400495
Actb	208	2.05953e-18	1.63829e-17	0.199314	0.293183	0.0457443
Ltbp2	180	2.16025e-18	1.71487e-17	0.281058	0.120393	0.317895
Vcp	266	2.67112e-18	2.11606e-17	0.295096	0.074838	0.0996175
Uck2	267	2.7194e-18	2.14988e-17	0.18389	0.147389	0.103242
Erf	209	3.30495e-18	2.60746e-17	-0.0050791	0.130501	0.0493271
P2rx4	133	4.04344e-18	3.18359e-17	0.0341857	-0.0601136	0.361297
Rap1gap	134	4.14705e-18	3.25852e-17	-0.0503258	-0.198119	0.268171
Psme2	271	5.98932e-18	4.6965e-17	0.276379	0.0454606	-0.0377171
Azin1	210	6.49601e-18	5.08349e-17	0.113144	0.171829	0.0843652
Serpinb5	154	6.6706e-18	5.20955e-17	0.234647	0.218829	0.288817
Wwtr1	228	7.48057e-18	5.83031e-17	0.235037	0.206304	0.147569
Yipf2	137	7.69941e-18	5.98877e-17	0.134838	-0.0482859	0.226953
Stk11	138	7.95546e-18	6.17548e-17	-0.0492254	-0.249457	0.339436
Eif4g2	213	9.89657e-18	7.66686e-17	0.132135	0.246581	0.10264
Tnfrsf1a	214	1.0578e-17	8.17832e-17	0.218576	0.242235	0.168961
Crispld2	140	1.07425e-17	8.28889e-17	0.239107	0.228736	0.402941
Ppp2ca	215	1.07758e-17	8.29799e-17	0.167548	0.232925	0.0558849
Ivns1abp	216	1.11044e-17	8.53406e-17	0.196023	0.20368	0.17561
Tpm1	141	1.1669e-17	8.95012e-17	0.313477	0.216056	0.409002
Mmp16	273	1.28364e-17	9.82599e-17	0.21049	-0.0514479	0.148833
Timp2	142	1.35041e-17	1.03166e-16	0.00694498	0.0609837	0.191964
H2-K1	143	1.37522e-17	1.04853e-16	0.362758	0.0616923	0.606232
Sec61a1	274	1.50918e-17	1.14841e-16	0.246255	0.121835	0.12424
Agt	145	1.5422e-17	1.17122e-16	0.0376973	-0.0753892	0.241546
Trim7	146	1.55067e-17	1.17534e-16	0.043986	0.0618267	0.273875
Cdc42se1	218	2.06364e-17	1.56108e-16	0.252845	0.232553	0.212915
Vasp	219	2.66295e-17	2.0105e-16	0.0972017	0.173804	0.180338
Nedd4l	221	2.86255e-17	2.15698e-16	-0.00543831	0.173386	0.195774
Nfe2l1	222	2.93297e-17	2.20573e-16	-0.0421595	0.214417	0.157013
Phactr1	277	3.01203e-17	2.26078e-16	0.212204	0.105108	-0.0824645
Col9a2	278	3.68938e-17	2.76381e-16	0.281859	0.0993907	0.160209
Gdpd1	149	3.85212e-17	2.88014e-16	0.233352	0.103184	0.293973
Atp1b1	279	3.89385e-17	2.9057e-16	0.300169	-0.0260969	-0.112953
Fundc2	280	3.9247e-17	2.92306e-16	0.285317	-0.00208928	0.153604
Casp12	282	4.2308e-17	3.14497e-16	0.223866	0.0266155	0.216074
Gbp2	215	5.26045e-17	3.90285e-16	0.0560473	0.142999	0.137278
Myd88	206	6.22013e-17	4.606e-16	0.0335321	0.176463	0.199371
Cks1b	284	6.37848e-17	4.71421e-16	0.185917	-0.0209831	-0.534272
Slc5a8	211	6.50915e-17	4.80158e-16	0.138037	0.164406	0.205601
Dkkl1	150	6.8065e-17	5.01135e-16	-0.22791	-0.0438688	0.417995
Slc35b2	287	7.30364e-17	5.36713e-16	0.247294	-0.0974915	-0.177017
Cpd	153	7.83903e-17	5.74075e-16	0.220158	-0.0402163	0.433499
Tpm4	229	7.84182e-17	5.74075e-16	0.119039	0.199887	-0.161168
Slc25a34	291	8.05716e-17	5.88722e-16	0.201084	-0.0774757	0.0965658
Anapc5	292	8.12737e-17	5.92729e-16	0.247146	0.0902983	-0.348648
Zwint	230	9.1049e-17	6.62768e-16	0.033494	0.171861	-0.0115226
Fas	155	1.06729e-16	7.75442e-16	0.0581219	0.103148	0.116596
Mvp	157	1.16939e-16	8.48028e-16	0.0179507	0.121362	0.213048
Fosl1	231	1.25368e-16	9.07452e-16	0.00654616	0.0918803	0.0578825
Pim1	233	1.43574e-16	1.03728e-15	-0.112585	0.192136	0.132816
Zyx	234	1.45349e-16	1.04814e-15	0.151616	0.17385	0.129823
Anxa3	235	1.47094e-16	1.05875e-15	0.0751384	0.111342	-0.0306615
Gramd3	160	1.59419e-16	1.14354e-15	0.0757683	0.152981	0.221876
Arf4	294	1.59467e-16	1.14354e-15	0.29249	0.00385001	-0.019485
Fxyd5	296	1.80476e-16	1.29179e-15	0.119895	0.0504295	0.0120671
Wipi1	297	1.86686e-16	1.33377e-15	0.205644	0.0669514	0.0313237
Sil1	298	1.96604e-16	1.40203e-15	0.219318	0.0113045	0.215216
Pdia4	299	2.05135e-16	1.46017e-15	0.235274	0.0269183	0.0276317
Cyp24a1	163	2.9139e-16	2.07032e-15	0.059813	0.0760589	0.186615
Slc12a2	164	3.021e-16	2.14247e-15	-0.0877793	-0.233461	0.459107
Casp1	302	3.30948e-16	2.34275e-15	0.219111	-0.186495	0.0905798
Tram1	303	3.39055e-16	2.39574e-15	0.291769	-0.00930057	0.271002
Clic6	165	3.43161e-16	2.42032e-15	-0.507853	-0.173111	0.43598
Os9	166	3.48021e-16	2.44566e-15	0.0895025	0.0433453	0.334707
Tsc22d1	287	3.47603e-16	2.44566e-15	0.256289	0.211121	0.115587
Jak1	167	3.59932e-16	2.52476e-15	0.0886795	0.166166	0.329334
Cdk2ap1	305	3.61461e-16	2.53088e-15	0.226808	-0.0288356	-0.216997
Kdm5b	236	3.83993e-16	2.68378e-15	0.112317	0.187284	0.229422
Cers2	307	4.21652e-16	2.94165e-15	0.252146	-0.00621021	-0.0213856
Pinc	309	4.62601e-16	3.22151e-15	0.131291	0.00968612	0.0768307
Muc15	170	4.96224e-16	3.44942e-15	0.0776986	0.0374325	0.352973
Shisa5	171	5.86393e-16	4.06889e-15	0.0424511	0.025257	0.344798
Ctsl	172	5.88852e-16	4.07862e-15	-0.397208	0.229696	0.481368
Lgals3bp	188	6.80872e-16	4.70754e-15	0.267666	0.0174261	0.290885
Atxn1	311	6.93967e-16	4.78949e-15	0.215937	-0.0123212	0.11341
Aldoa	173	7.74067e-16	5.33277e-15	-0.841512	-0.173654	0.715172
S100a6	238	8.07799e-16	5.55524e-15	0.139781	0.218939	0.0406726
Enah	243	8.67268e-16	5.95359e-15	0.230718	0.204739	0.257916
Rbpms	175	1.03114e-15	7.06596e-15	0.0886531	0.17898	0.331843
Ppp1r14b	313	1.12536e-15	7.69793e-15	0.23211	0.127967	-0.12443
Rab11fip1	239	1.20028e-15	8.19586e-15	0.0512932	0.125322	0.132177
N4bp3	314	1.40432e-15	9.57222e-15	0.198643	0.144699	0.00444614
Stambpl1	244	1.77552e-15	1.2081e-14	0.0969319	0.112187	0.119131
Bola3	316	1.78576e-15	1.21293e-14	0.222036	-0.0457148	-0.20643
Tspan1	317	1.80913e-15	1.22665e-14	0.124842	0.0274925	-0.0462033
Nabp1	245	1.83012e-15	1.23871e-14	0.0667148	0.12769	0.101978
Cck	179	2.3207e-15	1.568e-14	0.0824822	-0.127939	0.403674
Hivep2	247	2.32503e-15	1.56818e-14	0.0404565	0.113271	0.0971059
Anxa7	250	2.70528e-15	1.82146e-14	0.128154	0.215673	0.234564
Itga8	319	2.93318e-15	1.97146e-14	0.149952	0.0641032	0.0723543
Stx3	251	3.09191e-15	2.07453e-14	0.0451954	0.141244	0.119383
Fam220a	252	3.7015e-15	2.47738e-14	0.087683	0.169418	0.110229
Trp53bp2	253	3.70515e-15	2.47738e-14	0.0748733	0.121388	0.0684222
Ceacam1	254	3.97852e-15	2.65556e-14	0.00801146	0.239218	0.209663
Jpt1	320	4.03663e-15	2.68969e-14	0.258368	0.0272986	-0.667695
Tbrg1	321	4.09399e-15	2.72321e-14	0.243501	0.101745	0.133405
Cdk4	322	4.45107e-15	2.95563e-14	0.2436	0.0163604	-0.479298
Slc2a1	184	4.54785e-15	3.01471e-14	0.0066605	0.157623	0.288161
Rhou	186	4.71253e-15	3.11851e-14	0.0973997	0.163094	0.236695
Arl13b	255	4.74431e-15	3.13417e-14	0.0163419	0.128987	0.0602846
Crabp2	324	4.7746e-15	3.14879e-14	0.243216	0.0213703	0.19237
Chad	187	4.86623e-15	3.20374e-14	-0.156721	-0.19342	0.279672
Fam20a	189	5.09728e-15	3.35014e-14	0.0557357	-0.265445	0.350716
Sgms2	256	5.57878e-15	3.66036e-14	0.0539392	0.132332	0.142047
Spindoc	257	6.03176e-15	3.95085e-14	0.023039	0.10114	0.08268
Dyrk3	258	6.19343e-15	4.04988e-14	0.0828193	0.111558	-0.0455744
Dynlt3	191	6.81262e-15	4.44722e-14	0.242704	-0.0588556	0.329885
Clic4	259	6.88027e-15	4.48026e-14	0.00773358	0.13911	0.0779291
Cdcp1	260	6.88645e-15	4.48026e-14	0.0852935	0.140496	0.0530315
Dstn	261	6.92547e-15	4.49806e-14	-0.0185382	0.230397	0.12604
Ctxn1	326	7.13696e-15	4.62763e-14	0.123118	0.033393	-0.0552037
Klf13	262	8.15641e-15	5.27977e-14	-0.0477788	0.159588	0.202713
Eif4a2	193	8.35611e-15	5.39998e-14	-0.271318	-0.0190478	0.339769
Samd4b	263	8.38919e-15	5.41229e-14	0.0408643	0.136857	0.0444744
Nfkbiz	264	8.41637e-15	5.42076e-14	0.00557829	0.223621	0.176292
Scarb2	265	8.46113e-15	5.44051e-14	0.0492697	0.192438	0.213447
Igbp1	194	8.58293e-15	5.50964e-14	-0.0103067	0.00921793	0.287393
Tpm3	266	8.60751e-15	5.51624e-14	0.146878	0.216285	0.00611226
Ddx21	267	8.64092e-15	5.52847e-14	0.050231	0.141628	0.0445795
Plekhs1	195	9.1756e-15	5.86084e-14	0.0513733	0.0953373	0.124961
Tmem176a	327	1.03246e-14	6.58386e-14	0.265567	0.0484914	0.0628571
Rc3h1	268	1.05445e-14	6.71299e-14	0.0477236	0.106408	0.0629169
Cd151	328	1.07795e-14	6.85129e-14	0.228277	0.125086	0.105251
Fam84a	269	1.1625e-14	7.37649e-14	0.0588245	0.102094	0.0671335
Etf1	270	1.24102e-14	7.86181e-14	0.071514	0.175437	-0.0184892
Eif3e	329	1.31596e-14	8.32293e-14	0.277997	0.137105	0.140033
Pxmp4	330	1.32396e-14	8.35977e-14	0.206445	-0.103562	-0.0641861
Slfn2	197	1.471e-14	9.27305e-14	0.110836	0.103138	0.171516
Ehd1	272	1.50084e-14	9.44575e-14	0.140928	0.170581	0.122977
Tnfaip3	273	1.5086e-14	9.4791e-14	0.0440264	0.102359	0.0759976
Pmepa1	270	1.55587e-14	9.76022e-14	0.101485	0.239592	0.323367
Tgfa	332	1.57002e-14	9.83302e-14	0.123688	0.0495562	-0.0348216
Txnip	198	1.63349e-14	1.0214e-13	-0.335814	0.293246	0.499362
Tmcc3	200	1.72449e-14	1.07655e-13	0.085544	0.077128	0.139597
Timm17a	333	1.78035e-14	1.10963e-13	0.248404	-0.202926	-0.219683
Smagp	221	1.7953e-14	1.11714e-13	0.297123	-0.210308	0.360497
Sltm	275	1.86533e-14	1.15885e-13	0.117713	0.191114	0.177049
Csf1	276	1.97777e-14	1.22673e-13	0.000134807	0.110826	0.0875495
Zbp1	336	1.9928e-14	1.23406e-13	0.161277	0.0398803	0.11746
Entpd2	201	2.02281e-14	1.25064e-13	-0.0488781	-0.0215889	0.22207
Cxcl1	277	2.03318e-14	1.25504e-13	0.259414	0.435745	0.331345
Dusp14	278	2.18311e-14	1.34544e-13	0.0951372	0.119631	0.0894058
Homer2	339	2.31809e-14	1.42634e-13	0.251242	-0.0619046	0.0240905
Lao1	340	2.38325e-14	1.46411e-13	0.148309	0.0442184	-0.132631
Padi2	202	2.40789e-14	1.47689e-13	0.0329675	0.0407323	0.14789
Tspan2	342	2.69966e-14	1.65322e-13	0.175726	0.0414185	0.127348
Cdkn1a	280	2.73388e-14	1.67152e-13	-0.0973963	0.159811	-0.374175
Gna14	203	2.74775e-14	1.67735e-13	0.0648883	0.059939	0.193555
Glrx	345	2.8982e-14	1.76639e-13	0.220699	0.116732	-0.00912196
Acads	347	3.25975e-14	1.98361e-13	0.195744	-0.0107543	0.140299
Ranbp1	348	3.43288e-14	2.08568e-13	0.255544	0.00836559	-0.865213
Atp1a1	281	3.46231e-14	2.10025e-13	0.190345	0.247518	0.112329
Aqp5	349	3.4898e-14	2.1136e-13	0.385053	-0.884639	0.460214
Nfkb2	282	3.63049e-14	2.19537e-13	0.0339285	0.109724	0.0909194
Dnmt1	283	3.63959e-14	2.19742e-13	0.0867293	0.138252	-0.0531421
Erbb3	284	4.79774e-14	2.89214e-13	0.11853	0.157689	0.10761
Mindy2	208	5.21585e-14	3.13927e-13	-0.000201969	0.0179297	0.24237
Emb	354	5.37178e-14	3.22809e-13	0.129038	0.0117324	-0.325861
Itgb1	355	5.88767e-14	3.5326e-13	0.228409	0.121656	0.116347
Rdh10	285	6.07872e-14	3.64157e-13	0.0667307	0.15999	0.183521
Trp53inp1	286	6.30278e-14	3.76994e-13	-0.0539062	0.121668	0.0930928
Gm20442	209	6.95004e-14	4.15066e-13	0.00698066	-0.0134221	0.0810512
Fndc3a	242	7.90154e-14	4.71161e-13	0.20348	0.167234	0.255362
Ubald2	327	9.83698e-14	5.85665e-13	0.249779	0.204991	-0.106763
Srsf3	359	1.07192e-13	6.37205e-13	0.27239	-0.0852762	-0.562011
Cdhr1	213	1.12335e-13	6.66751e-13	-0.0077854	0.027384	0.0677199
Hibadh	214	1.20722e-13	7.15431e-13	-0.0825663	-0.0823477	0.253137
Rangap1	290	1.2907e-13	7.63728e-13	0.0758174	0.11386	-0.28014
Brd2	291	1.32462e-13	7.82601e-13	-0.0655791	0.182917	-0.0111982
1110008L16Rik	360	1.52188e-13	8.97771e-13	0.160174	0.0191864	-0.049609
Tgfb3	216	1.62692e-13	9.5827e-13	0.0375555	-0.0681365	0.279598
Gcnt2	217	1.63097e-13	9.59188e-13	0.0254106	0.0925221	0.118346
Xbp1	218	1.79071e-13	1.05153e-12	-0.03572	-0.453714	0.442813
Lsr	324	2.01128e-13	1.17926e-12	0.222619	0.188825	-0.0185638
Jup	296	2.03092e-13	1.18896e-12	0.240331	0.206357	-0.0304722
B4galt6	363	2.11999e-13	1.23923e-12	0.236132	-0.248994	0.175976
Gng12	364	2.20935e-13	1.28951e-12	0.244994	0.0320662	0.0757057
Stx11	295	2.32997e-13	1.35786e-12	0.036636	0.0689287	0.050822
Tmprss13	224	2.47266e-13	1.43667e-12	0.0206962	0.0429108	0.147262
Rab29	365	2.47149e-13	1.43667e-12	0.177311	-0.175337	0.148343
AA986860	225	2.55577e-13	1.48273e-12	0.085826	0.080108	0.116511
Irx3	226	2.56749e-13	1.48729e-12	0.0280771	0.192722	0.303634
Svil	227	3.05496e-13	1.76702e-12	0.0474861	0.0628204	0.20072
Card14	228	3.12092e-13	1.80247e-12	0.00298979	0.0340214	0.0677006
Ldhb	367	3.1266e-13	1.80305e-12	0.269332	0.0362404	-0.200331
Pde4d	229	3.18259e-13	1.8326e-12	-0.0866755	-0.00570899	0.229173
Sntb2	368	3.30265e-13	1.8989e-12	0.223222	0.0128045	-0.072357
Txndc12	369	3.32593e-13	1.90944e-12	0.198514	0.021738	0.0510344
Nek7	230	3.35291e-13	1.92207e-12	0.0998919	0.092621	0.175849
Znrf1	291	3.37674e-13	1.93286e-12	0.150476	0.184967	0.235375
Hhipl2	233	3.71391e-13	2.12271e-12	0.0306438	0.031484	0.253074
Cmtm6	370	3.95107e-13	2.25491e-12	0.18288	0.0634078	0.134217
Psmd1	371	3.99393e-13	2.27601e-12	0.195301	0.101341	-0.070248
Prss8	235	4.39942e-13	2.50339e-12	0.123605	0.0609964	0.230057
Spink5	288	4.69155e-13	2.66568e-12	0.180563	0.156306	0.183809
Slc6a2	236	4.88609e-13	2.77214e-12	0.119133	-0.176876	0.248565
Lamc2	301	4.94234e-13	2.79994e-12	0.103741	0.115395	0.121986
Plekhm1	302	5.05804e-13	2.86128e-12	0.0419748	0.0839814	0.0859659
Lcp1	376	5.24613e-13	2.96334e-12	0.189836	0.0414263	0.0652674
Npepps	303	5.26202e-13	2.96796e-12	-0.000898282	0.142962	0.0783004
Irf2bpl	239	5.43327e-13	3.06008e-12	0.022015	0.186442	0.290429
Fdx1	240	5.69169e-13	3.20095e-12	0.0551876	-0.0907727	0.252173
Senp2	304	5.749e-13	3.22848e-12	-0.0281183	0.122937	0.0637914
Cxcl2	305	5.91992e-13	3.31963e-12	0.108596	0.247184	0.137194
Zbtb7a	282	5.93901e-13	3.3255e-12	0.0209771	0.167074	0.239182
Ptprk	307	6.00041e-13	3.35501e-12	0.019297	0.148803	0.123794
Eif2s2	308	6.06084e-13	3.3839e-12	0.210511	0.216124	-0.123051
Rock2	309	6.53279e-13	3.64212e-12	0.0221731	0.1255	-0.0362878
Capn9	243	6.95336e-13	3.871e-12	-0.0304736	-0.0460211	0.145935
Tpbg	310	7.68353e-13	4.27133e-12	0.0278321	0.0815868	-0.0087391
Sh3bp5	245	7.79142e-13	4.32508e-12	0.130573	-0.00253195	0.236382
Tprgl	246	7.81247e-13	4.33053e-12	0.130475	0.0631231	0.271214
Tirap	247	7.85311e-13	4.34682e-12	0.0858935	0.0972997	0.14081
Cish	311	7.8718e-13	4.35092e-12	0.147872	0.166973	0.205488
Rora	249	8.47354e-13	4.67681e-12	-0.0480208	0.115194	0.22665
Ggct	378	8.84758e-13	4.87628e-12	0.125024	0.0729117	0.0469011
Cdc42ep5	250	9.00076e-13	4.95363e-12	0.0163313	-0.100273	0.195686
Cfl2	312	1.00304e-12	5.51244e-12	0.114642	0.170396	0.141817
Sytl1	254	1.13017e-12	6.20229e-12	0.121776	-0.0497768	0.235203
Akap12	379	1.17791e-12	6.45509e-12	0.141904	-0.14449	-0.307606
Eva1b	255	1.2434e-12	6.80428e-12	0.168075	-0.041221	0.233884
Ube2b	314	1.31757e-12	7.19999e-12	0.112145	0.205788	0.16179
Sp140	256	1.32263e-12	7.21742e-12	-0.0369156	-0.00192779	0.125822
Fam110c	315	1.34317e-12	7.31913e-12	0.078489	0.120586	0.0411814
Epb41l4b	257	1.41092e-12	7.6775e-12	-0.000106468	0.0381889	0.168224
Slc16a2	258	1.45668e-12	7.9153e-12	-0.0952772	0.074371	0.184513
Acsf2	259	1.4865e-12	8.06599e-12	0.0432247	-0.139562	0.239916
Pdcd4	260	1.53373e-12	8.31057e-12	0.199389	-0.173021	0.299089
Clca3a2	316	1.53801e-12	8.32207e-12	0.121764	0.145631	-0.081719
Arid5a	261	1.56289e-12	8.44484e-12	0.102034	0.113574	0.249307
Mpzl2	381	1.56576e-12	8.44852e-12	0.192569	0.100419	0.0619435
Klhl25	317	1.6604e-12	8.94668e-12	0.0727677	0.0962011	0.0863674
Impa2	382	1.6639e-12	8.95306e-12	0.153255	-0.0634788	-0.270706
Tmbim1	262	1.71312e-12	9.20502e-12	0.00418786	0.123025	0.273997
Il6ra	263	1.77301e-12	9.51358e-12	-0.0237098	0.00227445	0.127387
Mcrip1	384	1.79015e-12	9.59223e-12	0.23278	-0.0921538	0.083828
Noct	318	1.82629e-12	9.7723e-12	0.0561211	0.0725437	0.0477961
Ccdc25	385	1.87836e-12	1.0037e-11	0.174315	-0.0418017	0.0880292
Acadsb	264	2.02295e-12	1.07947e-11	0.0398713	-0.0160196	0.243202
Fosl2	319	2.07503e-12	1.10573e-11	0.0642133	0.127794	0.106606
Macrod1	266	2.2581e-12	1.20162e-11	-0.0884282	0.0198252	0.203958
Tgoln1	267	2.29083e-12	1.21736e-11	0.0435072	0.10043	0.248587
Rab6a	321	2.45858e-12	1.3047e-11	0.103249	0.157325	0.110768
Zfp637	387	2.46353e-12	1.30553e-11	0.184335	0.0260365	0.0049908
Oser1	322	2.47939e-12	1.31214e-11	0.0145927	0.165074	0.0238752
Ttpa	269	2.502e-12	1.32229e-11	0.117071	0.0699187	0.142881
Tead1	323	2.59058e-12	1.36723e-11	0.0117906	0.0755851	-0.0053328
Kazn	271	2.82788e-12	1.49043e-11	0.092787	0.0692998	0.138515
Phyh	273	2.98304e-12	1.57006e-11	0.153224	-0.0861705	0.301616
Fkbp4	389	3.06803e-12	1.6126e-11	0.24959	-0.135213	-0.266467
Cd164l2	275	3.32915e-12	1.74746e-11	0.0533687	-0.00230484	0.263792
1700012B07Rik	391	3.38728e-12	1.77556e-11	0.111145	-0.0338648	0.0607197
Sept11	326	3.48333e-12	1.82343e-11	0.102866	0.106435	-0.0588035
Angptl4	276	3.60354e-12	1.8838e-11	-0.00583998	0.0708061	0.0873375
Psmc2	392	3.79711e-12	1.98231e-11	0.212053	-0.00802054	-0.215002
Junb	277	4.05493e-12	2.11404e-11	-0.304718	0.190635	0.554199
Atp9a	393	4.61386e-12	2.401e-11	0.183741	0.0663685	-0.0105191
Ctsc	394	4.61779e-12	2.401e-11	0.152214	0.008028	-0.0201121
Bach1	329	5.05603e-12	2.62532e-11	0.0418516	0.074877	0.02186
4631405J19Rik	395	5.48259e-12	2.84299e-11	0.0978938	-0.0334091	0.00969276
Cttn	280	6.64316e-12	3.44017e-11	0.127759	0.0461189	0.256904
Fam214a	281	6.74794e-12	3.48975e-11	0.0483957	0.0457325	0.128069
Cd59a	311	6.84665e-12	3.53606e-11	0.204074	0.0390891	0.264016
Gm2a	397	7.6685e-12	3.95522e-11	0.218157	-0.0304574	0.198301
Dhrs7	398	7.92734e-12	4.08327e-11	0.20745	-0.145252	-0.0677744
Akirin2	330	9.08891e-12	4.67533e-11	0.0654935	0.144067	0.124361
Elovl6	400	9.20829e-12	4.73044e-11	0.113884	-0.0127089	-0.0953421
Mgat2	401	9.55298e-12	4.90098e-11	0.214848	-0.026924	0.0345954
Emp2	297	1.00196e-11	5.13352e-11	0.179674	0.165459	0.209737
Slc15a2	402	1.01232e-11	5.17974e-11	0.171234	0.0475662	0.031558
Tceal8	403	1.04685e-11	5.34934e-11	0.216073	-0.0318752	-0.0195333
Mfsd4a	284	1.06304e-11	5.42487e-11	-0.0354971	-0.178586	0.160003
Faim2	405	1.08731e-11	5.54142e-11	0.269367	-0.202688	0.140616
Cldn10	285	1.16705e-11	5.93995e-11	-0.869183	-0.408371	0.42962
B4galnt1	286	1.24329e-11	6.31965e-11	-0.00106229	-0.030299	0.282114
Psmb8	407	1.25331e-11	6.3622e-11	0.263053	0.00994843	0.0774615
Slc41a1	289	1.51681e-11	7.6897e-11	-0.0133427	-0.0760541	0.191301
Copz2	373	1.55053e-11	7.85031e-11	0.229863	-0.0225166	0.287286
Plec	335	1.68692e-11	8.52967e-11	0.0645246	0.136076	0.0987868
Sde2	336	1.69349e-11	8.55166e-11	0.0618055	0.141071	0.120704
St3gal1	292	1.72609e-11	8.70492e-11	-0.0439679	0.0478493	0.127514
Lmod1	412	1.78412e-11	8.9858e-11	0.145352	-0.0682572	0.161774
Nab1	337	1.83533e-11	9.23169e-11	0.0806864	0.125977	0.0563739
Desi2	338	1.87986e-11	9.44335e-11	0.0788695	0.156143	0.0729573
Casz1	295	2.00414e-11	1.00546e-10	0.0100945	0.0914535	0.156416
Hagh	414	2.02111e-11	1.01265e-10	0.199305	-0.143849	0.0787101
Trp53i11	339	2.07275e-11	1.03718e-10	-0.0121429	0.0649056	0.0371251
Ddo	296	2.08099e-11	1.03995e-10	0.0410949	-0.0739572	0.164999
1500011K16Rik	415	2.2061e-11	1.10105e-10	0.183756	-0.118509	0.0394631
Casp4	298	2.33228e-11	1.16252e-10	0.0714803	0.118187	0.247897
Abca1	340	2.45682e-11	1.22302e-10	0.00567876	0.0823654	0.0938722
Zc3hav1	341	2.7863e-11	1.38525e-10	0.0601949	0.114132	0.0569903
Slc31a2	301	2.91514e-11	1.44744e-10	0.168595	-0.382746	0.297285
N4bp1	342	2.99702e-11	1.48618e-10	0.0375032	0.106161	0.0900776
Ehf	343	3.02736e-11	1.4993e-10	0.0705207	0.190046	0.268571
Srebf1	302	3.04074e-11	1.504e-10	-0.0493826	-0.220202	0.480647
Gm16124	304	3.09331e-11	1.52804e-10	-0.0200634	-0.0216463	0.145025
Phf11d	306	3.25426e-11	1.60549e-10	0.0558913	0.109103	0.156605
Camk2d	308	3.47119e-11	1.71033e-10	0.109782	0.118706	0.18351
Smim22	309	3.48771e-11	1.71628e-10	0.102225	-0.0339361	0.342229
Med13	346	3.5324e-11	1.73605e-10	0.0278276	0.097279	0.0589067
Myo6	310	3.56635e-11	1.75051e-10	-0.0680684	0.0837251	0.179044
Wdr1	419	3.72838e-11	1.82771e-10	0.192949	0.0889084	0.105983
Izumo4	312	3.75159e-11	1.83676e-10	-0.00085494	-0.00352711	0.0997973
Hspa1a	347	4.26131e-11	2.08367e-10	-0.368757	0.342285	0.29092
Ppp1r15a	314	4.28318e-11	2.09171e-10	-0.15938	0.129011	0.171181
Ppp1cb	315	4.38555e-11	2.13899e-10	0.0612801	-0.13883	0.275582
Sectm1b	348	4.43648e-11	2.1611e-10	-0.00511633	0.0525013	0.0520182
Sptlc2	349	4.69015e-11	2.28179e-10	0.0661831	0.111852	0.0260192
Adamts8	350	5.02806e-11	2.44311e-10	0.0346612	0.0531801	0.0412616
Egf	318	5.16762e-11	2.50776e-10	-0.00730423	-0.063972	0.0887456
Tnf	351	5.41015e-11	2.62216e-10	0.0512257	0.106961	0.0583245
Ubl4a	423	5.51635e-11	2.67027e-10	0.197906	-0.0272868	-0.0579178
Secisbp2l	425	5.70079e-11	2.7561e-10	0.240874	-0.303254	0.10508
Sf3b1	352	5.71676e-11	2.76036e-10	0.0999113	0.190257	0.109546
Extl1	320	5.79785e-11	2.79601e-10	0.0600542	0.0216456	0.113033
Cadm4	353	5.84902e-11	2.81717e-10	0.0372478	0.0829066	0.0906668
Cebpg	354	5.93979e-11	2.85732e-10	0.000542913	0.155234	0.177705
Prkcd	355	6.03806e-11	2.90098e-10	-0.00470095	0.102092	0.0545871
Hmox1	356	6.35239e-11	3.0482e-10	-0.210417	0.138707	0.122554
Zfp36l2	357	6.36611e-11	3.05099e-10	0.0992551	0.163998	0.155851
Ar	322	6.3776e-11	3.0527e-10	0.0117052	0.00554179	0.100733
Dctpp1	426	6.56151e-11	3.13684e-10	0.17593	-9.82832e-05	-0.695696
Slc38a2	359	6.58988e-11	3.14651e-10	0.0304446	0.181482	0.0290667
Hs2st1	360	7.02586e-11	3.35053e-10	0.0407825	0.14916	0.0286519
Slc7a5	427	7.13941e-11	3.40048e-10	0.146073	0.028568	0.0518376
Tmem123	325	7.2141e-11	3.43181e-10	0.124467	0.0200194	0.233108
Arih1	361	7.38786e-11	3.51014e-10	0.0108967	0.123553	0.0792776
Hdgf	429	7.50722e-11	3.56247e-10	0.230521	0.14618	-0.360326
Rnf11	362	7.6652e-11	3.63297e-10	0.0671106	0.153113	0.205227
Pros1	363	7.70057e-11	3.64525e-10	0.0671193	0.0939531	0.0261338
Cpne8	364	8.20769e-11	3.88055e-10	0.0495126	0.111338	0.0502744
Elf3	326	9.10712e-11	4.30052e-10	-0.0154991	0.0678453	0.0956835
Lyar	430	9.55806e-11	4.50795e-10	0.173969	0.0809498	-0.398684
Zfp467	327	9.58179e-11	4.51362e-10	-0.182619	-0.0910593	0.151119
Tle1	328	9.79961e-11	4.6106e-10	0.0783535	0.109537	0.186673
Pigp	329	1.00619e-10	4.72825e-10	0.167817	-0.0713962	0.267934
Gm26532	365	1.04172e-10	4.88923e-10	-0.0447466	0.0691446	0.0112652
Gns	331	1.12245e-10	5.26174e-10	-0.0429685	0.0339925	0.160596
Bckdha	432	1.14726e-10	5.3715e-10	0.214139	-0.0728668	0.241048
Gm14005	433	1.17416e-10	5.49078e-10	0.103658	0.0503159	0.00209604
Erbin	366	1.1851e-10	5.53523e-10	0.070168	0.140065	0.157615
Spag9	367	1.21363e-10	5.66163e-10	0.0102361	0.136068	0.104592
Abhd5	418	1.21795e-10	5.67493e-10	0.18857	0.131249	0.209904
Ell	360	1.25397e-10	5.83572e-10	0.0225553	0.0919324	0.102728
Fam110a	369	1.32412e-10	6.15476e-10	0.0719696	0.11537	-0.0412872
Gmfg	437	1.3376e-10	6.20995e-10	0.148656	-0.0310953	0.0370402
March7	370	1.34922e-10	6.25638e-10	0.0127206	0.142409	0.110892
Abcf1	439	1.36483e-10	6.32115e-10	0.205508	0.0173608	-0.0264434
Il6st	371	1.39164e-10	6.4376e-10	0.0357902	0.0897634	0.0747089
Tmem50b	333	1.54472e-10	7.13717e-10	0.14032	-0.0295795	0.19199
St14	372	1.56941e-10	7.24257e-10	0.0123055	0.167953	0.213147
Mafk	373	1.57274e-10	7.24928e-10	-0.00501682	0.0990298	0.104158
Tmem154	441	1.60125e-10	7.37188e-10	0.0984147	-0.00217412	0.0202525
Ccpg1	334	1.63757e-10	7.53007e-10	-0.0327266	0.0327016	0.151412
Cyb5a	335	1.65569e-10	7.60433e-10	0.113218	-0.107718	0.298952
Golga4	336	1.74004e-10	7.98225e-10	0.0221314	0.049981	0.197116
Ninj1	443	1.89614e-10	8.68799e-10	0.1967	-0.15015	0.0772334
Eif4g3	445	2.11328e-10	9.67146e-10	0.166975	0.00190822	0.137297
Hacd1	446	2.11721e-10	9.67794e-10	0.102243	0.0287137	-0.218564
Flna	375	2.12853e-10	9.7182e-10	0.113456	0.107275	0.00391868
Hnrnpu	376	2.20921e-10	1.00746e-09	0.0393836	0.171836	-0.317092
Zfp281	377	2.29336e-10	1.0446e-09	0.0487399	0.0779387	0.0865561
Ddah2	341	2.3066e-10	1.04939e-09	-0.0612	0.0447537	0.308068
D7Ertd443e	342	2.32925e-10	1.05845e-09	0.0249002	0.0238439	0.0973253
Ttc39a	343	2.54857e-10	1.15675e-09	0.106776	0.0132068	0.18903
Slc9a3r1	379	2.77797e-10	1.25939e-09	0.148696	0.178187	0.185396
Rbp7	447	2.87579e-10	1.30221e-09	0.159298	-0.0270474	-0.522936
Sae1	448	2.95248e-10	1.33536e-09	0.139923	-0.069982	-0.456701
Csf3	380	3.04144e-10	1.37238e-09	0.0717465	0.130564	0.0598299
Bckdk	449	3.04034e-10	1.37238e-09	0.196034	-0.147656	-0.011794
Mmp15	450	3.05264e-10	1.37583e-09	0.141366	0.0328025	0.0964115
Abhd2	345	3.05863e-10	1.37692e-09	0.141218	-0.078457	0.208256
Lgals3	381	3.11111e-10	1.39891e-09	-0.146849	0.208856	0.243019
Nap1l1	451	3.17872e-10	1.42765e-09	0.195274	0.100758	-0.460785
Lrrc51	346	3.28438e-10	1.47339e-09	-0.0229425	-0.0164061	0.0817708
Hivep3	347	3.31245e-10	1.48425e-09	-0.0462128	0.0550059	0.164021
Pvr	382	3.38764e-10	1.51618e-09	0.0433875	0.0741017	0.0106925
Rasl10a	383	3.47485e-10	1.55341e-09	0.0249005	0.0399789	0.0108595
Gtpbp4	384	3.78887e-10	1.69184e-09	0.0646439	0.139257	-0.0582723
Tax1bp3	415	3.80623e-10	1.69762e-09	0.198773	0.161234	0.170939
Slc39a14	350	3.91237e-10	1.74295e-09	0.06037	0.108127	0.176284
March8	351	4.07907e-10	1.81511e-09	0.0395585	-0.000763263	0.117122
Frat2	385	4.16539e-10	1.85139e-09	0.00170038	0.0685949	0.0554764
Gda	387	4.29852e-10	1.90836e-09	0.0800278	0.0872903	0.0736286
Arhgef6	353	4.47688e-10	1.98526e-09	-0.201206	-0.0216687	0.176781
Trp53inp2	388	4.56929e-10	2.02392e-09	0.130018	0.124515	0.104978
Muc20	356	4.68586e-10	2.07317e-09	0.0713778	0.0392603	0.10466
Mark3	389	4.8484e-10	2.14263e-09	0.0832021	0.106065	-0.0032766
Sectm1a	357	4.91009e-10	2.16741e-09	0.0343395	0.041999	0.0896571
Ptpre	455	4.96369e-10	2.18856e-09	0.0962121	-0.0603857	0.0159519
Bcl2	359	5.10258e-10	2.24723e-09	0.022047	-0.0730232	0.15035
Smoc2	362	5.58898e-10	2.45643e-09	-0.0281382	-0.0885894	0.176684
Irgq	390	5.59031e-10	2.45643e-09	0.0827146	0.110949	0.141869
Bricd5	363	5.62199e-10	2.46754e-09	0.0031063	-0.231327	0.394432
Tex30	456	5.82508e-10	2.55377e-09	0.130435	0.0703035	-0.0381466
3110043O21Rik	391	5.95159e-10	2.60627e-09	0.0600349	0.068287	0.0620341
Zswim4	392	5.98803e-10	2.61925e-09	0.0149994	0.0577884	0.0294483
Mlf1	394	6.08098e-10	2.6569e-09	0.0211166	0.0612886	-0.117895
Banf1	458	7.08994e-10	3.09423e-09	0.18213	-0.0125521	-0.444045
Bcar1	382	7.16237e-10	3.12231e-09	0.0794438	0.125263	0.174582
Tcim	366	7.32114e-10	3.18792e-09	0.0448283	0.0957068	0.137992
Lamb3	459	7.53753e-10	3.27844e-09	0.0839856	0.0445125	0.076445
Gan	395	7.755e-10	3.36923e-09	0.00691295	0.0791766	0.046254
Pold4	367	7.82703e-10	3.3967e-09	0.0241963	-0.0476183	0.253475
D730003I15Rik	368	7.95268e-10	3.44735e-09	-0.0654677	-0.0299547	0.133644
Sort1	372	8.44005e-10	3.65451e-09	0.0652565	0.0121008	0.183184
Rab7b	462	8.76912e-10	3.79274e-09	0.109009	0.0618373	0.0927144
Igsf3	398	8.8454e-10	3.82145e-09	0.0324594	0.108621	-0.0575547
Sh3bp2	399	8.89192e-10	3.83725e-09	0.0160921	0.0547884	0.0422105
Hk1	464	8.9554e-10	3.86033e-09	0.198328	-0.104909	-0.102555
Fbxo30	400	9.02479e-10	3.8859e-09	0.0219341	0.0677686	0.0232209
Isg20	374	9.41013e-10	4.0473e-09	-0.00626245	0.0316951	0.0568279
Dazap1	466	9.93184e-10	4.26693e-09	0.146933	0.0531721	-0.262662
Bloc1s1	378	1.18973e-09	5.10567e-09	0.102961	0.0237391	0.178026
Tnfsf12	379	1.22009e-09	5.22433e-09	-0.00437496	-0.0295098	0.104863
Pdxk	467	1.21951e-09	5.22433e-09	0.138038	-0.0178727	0.12258
1110032A03Rik	380	1.38368e-09	5.91823e-09	0.0130318	-0.0610608	0.18329
Snrpg	469	1.40962e-09	6.02249e-09	0.185485	0.0259856	-0.509126
AC168977.2	383	1.43487e-09	6.1236e-09	-0.0193557	-0.00526582	0.0607992
Ifrd1	403	1.43756e-09	6.12828e-09	0.00530169	0.166132	0.202047
Tapbp	384	1.48617e-09	6.32854e-09	0.146674	0.0898492	0.238614
Cd55	471	1.52899e-09	6.5037e-09	0.158278	-0.0101854	0.173032
Tmem248	472	1.57979e-09	6.71236e-09	0.151033	0.055371	0.0783639
Prkca	404	1.65611e-09	7.02891e-09	-0.0140348	0.121901	0.0537888
Ikzf4	385	1.73444e-09	7.35328e-09	0.0369131	0.058861	0.0748967
Ubxn4	386	1.7427e-09	7.38017e-09	0.162645	0.129952	0.290016
Prkci	405	1.78729e-09	7.56071e-09	0.0419455	0.0840291	0.050992
Psmb10	474	1.83324e-09	7.74659e-09	0.138345	0.0235502	0.0854978
Wwc1	475	1.8644e-09	7.86962e-09	0.15743	-0.0381122	-0.0250179
Pdlim4	407	1.89007e-09	7.96928e-09	0.0355894	0.0555087	-0.178124
Wee1	409	1.94789e-09	8.2041e-09	0.0168384	0.100053	0.0249174
Slc41a2	411	2.09008e-09	8.79339e-09	0.0375989	0.048043	0.0586299
Psmb9	476	2.14602e-09	9.01888e-09	0.139637	-0.0470509	-0.142843
Cda	477	2.21934e-09	9.3169e-09	0.113995	0.0596575	0.0669157
Mcfd2	388	2.25295e-09	9.43798e-09	0.128116	0.0151479	0.249929
Map3k8	412	2.25308e-09	9.43798e-09	0.061682	0.123529	0.0958356
Igf2r	478	2.26479e-09	9.47674e-09	0.127228	0.0441896	0.0437983
Gm13056	389	2.33393e-09	9.75546e-09	0.103477	0.00760262	0.153393
Syn2	425	2.3966e-09	1.00066e-08	0.0962427	-0.0606092	0.112502
Picalm	483	2.83854e-09	1.1839e-08	0.126133	0.0406335	0.121609
Ddx39b	484	2.86427e-09	1.19334e-08	0.180625	-0.00953255	-0.358814
2200002D01Rik	414	2.90385e-09	1.20853e-08	-0.0230341	0.112204	0.15398
Tmprss11a	395	2.90847e-09	1.20915e-08	0.0310575	0.0113049	0.0563861
B4galt1	397	3.19813e-09	1.32813e-08	0.080026	0.0409594	0.192917
Vcl	417	3.28088e-09	1.36104e-08	0.0121671	0.0850966	-0.0318052
Mcm5	487	3.55733e-09	1.47413e-08	0.0399684	0.00301814	-0.372525
Sbsn	398	3.62667e-09	1.50125e-08	-0.133954	0.0729808	0.144304
Chit1	419	3.82602e-09	1.58208e-08	0.0559161	0.0667395	0.0165956
Atp2b1	420	3.98866e-09	1.64757e-08	0.160976	0.16146	0.0878906
Lrg1	421	4.68625e-09	1.93364e-08	0.0179132	0.166773	0.158849
Camk2n1	399	4.69506e-09	1.93521e-08	-0.132353	0.0164077	0.120586
Tulp1	401	4.75888e-09	1.95942e-08	-0.0361993	-0.0459951	0.111013
Pak1	422	5.08591e-09	2.09184e-08	0.124238	0.121171	-0.00682028
Sox9	423	5.44439e-09	2.2369e-08	0.0404544	0.17852	0.223238
Adam9	424	5.58187e-09	2.29094e-08	0.0572814	0.0802298	0.0455082
Kctd11	425	5.63077e-09	2.30856e-08	0.0430942	0.0533522	0.0216589
Acsl1	404	5.6768e-09	2.32496e-08	0.111985	0.0629564	0.174805
Nbeal1	405	5.71211e-09	2.33694e-08	-0.0202249	0.0228399	0.105887
Set	490	5.80099e-09	2.37079e-08	0.20794	0.0833327	-0.502162
Ttll10	406	6.20776e-09	2.53434e-08	-0.000626588	0.00192038	0.0394103
Tspan15	492	6.57974e-09	2.68337e-08	0.19051	-0.112032	0.128274
Lgals9	494	6.75593e-09	2.75231e-08	0.0946374	-0.00822362	0.0342455
Mpzl3	426	7.15259e-09	2.91083e-08	0.0327604	0.0953196	0.107773
Bhlhe41	409	7.2345e-09	2.94106e-08	-0.0121747	0.0125818	0.0358876
Slc35e4	427	7.39741e-09	3.00413e-08	0.0289427	0.111049	0.126261
Diaph1	428	7.42684e-09	3.01291e-08	0.0601194	0.101454	0.018037
Rem2	429	7.52861e-09	3.05099e-08	0.0603926	0.0744319	0.0263313
Prpf39	430	7.59425e-09	3.07436e-08	0.0351809	0.0894349	0.00184919
Bet1l	411	7.7084e-09	3.11458e-08	0.0946625	-0.0112125	0.195064
Plb1	412	7.70976e-09	3.11458e-08	0.0739477	-0.162689	0.430145
Tspan17	413	7.84017e-09	3.16395e-08	0.0571263	0.0342323	0.124512
Ptprf	414	7.85151e-09	3.16522e-08	0.153939	0.0938332	0.237543
Tanc1	417	8.14667e-09	3.28078e-08	0.0441123	0.1171	0.243806
Cast	431	8.16311e-09	3.28397e-08	0.135604	0.135875	0.0195743
Map1b	432	8.28415e-09	3.32919e-08	0.0454683	0.0807674	0.0732718
Golgb1	419	8.61432e-09	3.45828e-08	0.0807695	0.0396222	0.222186
Tuba4a	499	8.66669e-09	3.47569e-08	0.283968	0.215729	0.169875
Trim16	433	8.98323e-09	3.59889e-08	0.0244937	0.051894	0.0190048
Oas1a	500	9.45974e-09	3.78586e-08	0.0862776	0.0242831	0.0402299
Sec63	501	9.56625e-09	3.82452e-08	0.149377	0.0360769	0.0900451
Trafd1	435	9.90829e-09	3.95716e-08	0.0408971	0.0921648	0.0705881
Rel	437	1.02783e-08	4.10068e-08	0.0109052	0.0563024	0.0286593
Fasn	502	1.08805e-08	4.33648e-08	0.126195	-0.0338011	0.039948
Flvcr1	438	1.09218e-08	4.34843e-08	0.0469175	0.0725482	0.0482486
Nectin4	439	1.10522e-08	4.39581e-08	0.0569214	0.116047	0.125612
Nhsl1	448	1.16203e-08	4.617e-08	0.136174	0.0439242	0.165153
Met	441	1.18955e-08	4.72149e-08	0.0418391	0.0662116	0.0305931
Pglyrp1	505	1.23977e-08	4.91576e-08	0.127096	0.0792967	-0.696051
Lgals1	506	1.24386e-08	4.92692e-08	0.170345	0.060025	0.0831813
Gm31108	428	1.26145e-08	4.99148e-08	0.036983	-0.0949942	0.125971
Cd99l2	507	1.27283e-08	5.03134e-08	0.163831	0.000242307	0.123903
Wdr45	429	1.31065e-08	5.17552e-08	-0.0265239	-0.017643	0.125729
Cdv3	442	1.32889e-08	5.2422e-08	0.0843786	0.12697	0.0163361
Psmd11	475	1.3409e-08	5.28417e-08	0.18439	0.139541	0.0192018
Kcnj8	509	1.34934e-08	5.31199e-08	0.0764635	-0.0407654	0.0959495
Lbh	511	1.40797e-08	5.53717e-08	0.126279	0.0615706	-0.0383401
Rlim	443	1.60911e-08	6.32174e-08	0.0533337	0.092714	0.0843981
Plaur	444	1.64741e-08	6.46561e-08	0.0123693	0.0484258	0.0392935
Wap	514	1.70528e-08	6.68594e-08	0.0838117	0.0300801	0.0728948
Kdelr2	515	1.7138e-08	6.71254e-08	0.161775	0.0238491	-0.157836
Ripk4	435	1.73108e-08	6.76968e-08	0.0507258	0.0683589	0.106858
Bmp2k	445	1.7319e-08	6.76968e-08	0.0471052	0.0675794	0.0544836
Cxcl12	437	1.80482e-08	7.04755e-08	-0.0084135	-0.00128265	0.0840112
Bid	516	1.81063e-08	7.06312e-08	0.084736	0.0250694	-0.0198971
Sfpq	446	1.85013e-08	7.20989e-08	0.137809	0.136198	-0.224208
Gm38335	447	1.94326e-08	7.56518e-08	0.0837426	0.0864769	0.0754156
Gm48882	519	1.99155e-08	7.74538e-08	0.174217	-0.230652	-0.0070499
Lipg	465	2.00291e-08	7.78169e-08	0.0623101	0.0582664	0.0304094
Mlph	439	2.01951e-08	7.8383e-08	-0.0709411	-0.191801	0.157335
Map3k1	448	2.03055e-08	7.87322e-08	0.00059162	0.0921346	0.106197
Cpq	444	2.27444e-08	8.81003e-08	0.147665	-0.0202827	0.213145
Ypel5	451	2.28323e-08	8.8352e-08	0.067616	0.126602	0.181891
Tyms	521	2.29452e-08	8.86999e-08	0.0844777	0.00229581	-0.864756
Zbtb20	445	2.38353e-08	9.20485e-08	-0.0333383	0.0798243	0.241413
Tnip2	446	2.46294e-08	9.50202e-08	-0.0161382	0.0492334	0.0919568
Gas6	447	2.46827e-08	9.51309e-08	-0.11397	0.0282826	0.089736
Krcc1	522	2.52071e-08	9.70549e-08	0.170757	-0.122599	-0.06992
Mlxip	450	2.74641e-08	1.0564e-07	0.0318673	0.0540981	0.0977892
Dtx3	453	2.95616e-08	1.13594e-07	-0.214511	-0.0390104	0.199409
C1rl	455	3.02458e-08	1.16108e-07	0.0299028	-0.0329338	0.123261
Spty2d1	456	3.03228e-08	1.16288e-07	0.0681241	0.0816535	0.131347
Palmd	525	3.06294e-08	1.17347e-07	0.170206	-0.0775985	0.09259
Pnpla2	457	3.09909e-08	1.18614e-07	-0.185893	-0.0632604	0.195445
Arhgef5	452	3.24032e-08	1.23816e-07	0.00909101	0.105781	0.0982755
Derl3	526	3.24143e-08	1.23816e-07	0.12521	-0.0364202	-0.1213
Snrpd1	527	3.28716e-08	1.25439e-07	0.163185	-0.0431951	-0.730846
Myh9	453	3.29232e-08	1.25512e-07	0.0189938	0.122846	0.0949642
Rtp4	493	3.59315e-08	1.36845e-07	0.159669	0.031157	0.155069
Isyna1	529	3.69049e-08	1.40413e-07	0.0878415	0.0401456	-0.117808
Hnrnpm	530	3.83086e-08	1.4561e-07	0.137943	0.023294	-0.307458
Atp6v1a	531	3.88939e-08	1.4769e-07	0.181955	0.102741	0.23837
Elf5	461	4.56219e-08	1.73067e-07	0.00933976	-0.175384	0.219273
Ddr1	469	4.73402e-08	1.79409e-07	0.135966	0.116662	0.128052
Shisa4	535	4.95935e-08	1.87764e-07	0.0679975	0.0305884	-0.0212703
Ak3	536	5.02275e-08	1.89978e-07	0.162038	-0.035928	0.15208
Gabarapl1	465	5.03391e-08	1.90214e-07	-0.0608259	0.0852787	0.200092
Ctnna1	456	5.17262e-08	1.95264e-07	0.0394135	0.142888	0.115226
Ralb	458	5.33304e-08	2.01123e-07	0.0796254	0.11417	0.134196
Tmem141	538	5.66119e-08	2.1329e-07	0.126731	-0.0757308	0.0591613
Diaph2	466	5.67077e-08	2.13442e-07	-0.00792074	-0.00245876	0.0740867
Vsnl1	539	5.79343e-08	2.17847e-07	0.0657205	-0.0786657	-0.012995
Ccrl2	468	5.81109e-08	2.18298e-07	0.0101286	0.0602664	0.0779135
Tecpr1	540	5.87426e-08	2.20456e-07	0.104511	-0.0413174	0.0101764
Tax1bp1	460	5.99221e-08	2.24664e-07	0.097295	0.152702	0.000526232
Guca1a	469	6.17478e-08	2.31284e-07	0.058065	-0.0178872	0.134882
Bsdc1	471	6.42922e-08	2.40581e-07	0.0216503	0.0927644	0.159108
Hmgn2	543	6.52129e-08	2.4379e-07	0.133071	-0.0134688	-0.852247
Fam96a	544	6.55425e-08	2.44785e-07	0.14279	-0.111863	-0.263975
Eid1	545	6.56081e-08	2.44793e-07	0.153962	-0.155777	0.12742
Ndst1	475	6.83846e-08	2.54906e-07	0.0564314	0.0852217	0.130121
Lrrfip1	463	7.28935e-08	2.71451e-07	0.0917053	0.136707	0.155608
Abhd17c	479	7.81669e-08	2.90808e-07	-0.0621941	-0.0886695	0.181119
Fkbp3	547	7.92942e-08	2.94718e-07	0.174215	-0.0149989	-0.360749
Mex3a	464	8.05426e-08	2.9907e-07	0.058218	0.0620753	-0.0719188
Hebp2	548	8.10537e-08	3.00678e-07	0.130455	0.0338589	0.070866
Rraga	550	8.53953e-08	3.16479e-07	0.153897	-0.0856131	0.146758
Kcnk5	551	8.64607e-08	3.2012e-07	0.150287	-0.0509521	0.113664
Tgfb2	481	8.92004e-08	3.29947e-07	0.0416983	-0.0120897	0.127542
Ankrd12	482	8.93352e-08	3.30129e-07	0.0116938	0.00350413	0.193317
Erlec1	552	9.03878e-08	3.337e-07	0.155465	0.0176146	0.133811
Nr1d1	483	9.44962e-08	3.48534e-07	-0.0608589	0.0505863	0.153914
Wdr44	466	1.00904e-07	3.71811e-07	0.0362747	0.062317	0.06998
Ncdn	487	1.01152e-07	3.7237e-07	0.0416446	0.025529	0.0906203
Mrps6	556	1.18234e-07	4.34838e-07	0.188797	-0.282817	-0.102173
Grb7	470	1.20036e-07	4.40627e-07	0.0310289	0.0912651	0.0740379
Dnajc1	557	1.19962e-07	4.40627e-07	0.151169	0.000186937	-0.0421188
Akap11	472	1.25024e-07	4.58501e-07	0.00281439	0.0677063	0.0142127
Hspa1b	473	1.25149e-07	4.58522e-07	-0.116112	0.0946193	0.0603634
Nqo1	494	1.28383e-07	4.69926e-07	-0.0448028	0.0599688	0.0666723
Cebpb	474	1.36435e-07	4.98924e-07	-0.157456	0.137146	0.267454
Npy	495	1.38219e-07	5.04971e-07	0.36193	0.0717899	0.557575
Tap1	559	1.39036e-07	5.07474e-07	0.0947573	-0.00997106	0.0235995
Rb1cc1	476	1.44264e-07	5.26058e-07	0.0681943	0.110154	0.0776797
Bax	560	1.50646e-07	5.48812e-07	0.148046	-0.0169253	-0.276263
Cnnm2	477	1.52607e-07	5.55433e-07	0.0186311	0.0590951	0.0585562
Rffl	478	1.58158e-07	5.75058e-07	0.0491727	0.0609241	0.0532389
Ptger4	496	1.58297e-07	5.75058e-07	0.0171937	0.0189544	0.0283461
Fam83h	480	1.59999e-07	5.80692e-07	0.0041842	0.0691481	0.030603
Hebp1	497	1.61773e-07	5.86579e-07	0.000255564	-0.0529899	0.198948
Tmem125	498	1.62446e-07	5.88465e-07	0.0347333	0.0615362	0.0937033
Cmbl	499	1.63505e-07	5.91747e-07	0.0149325	-0.00550994	0.0568298
Mpp5	481	1.63934e-07	5.92744e-07	0.0316413	0.0897658	0.0918991
Ldlrad4	501	1.67282e-07	6.04283e-07	-0.102532	-0.0222906	0.114189
Msx2	482	1.67591e-07	6.04834e-07	0.0139896	0.050838	0.0504231
Gprc5b	502	1.72625e-07	6.22417e-07	-0.0952853	-0.0797205	0.0999447
Lama5	483	1.79275e-07	6.4579e-07	0.0134576	0.0573169	-0.0152402
C77080	506	1.82676e-07	6.5743e-07	0.0723564	0.0739009	0.116265
Adamtsl2	507	1.84361e-07	6.62874e-07	-0.0442028	0.0072828	0.0305049
Creb3l1	564	1.84609e-07	6.6315e-07	0.11931	-0.0657988	0.0203359
Ifi35	566	1.87607e-07	6.7329e-07	0.142783	-0.0126615	0.0328444
Ephb3	485	1.97214e-07	7.07112e-07	0.0357482	0.0558281	0.0318136
Kif1c	567	2.01189e-07	7.20693e-07	0.105057	0.0547037	0.108556
Ormdl3	510	2.02395e-07	7.2434e-07	0.0668289	-0.0995195	0.190824
Mettl9	568	2.10901e-07	7.54084e-07	0.187336	-0.176001	-0.104234
Fhl2	492	2.19759e-07	7.85027e-07	0.0465613	0.0454736	0.0261357
Prnp	569	2.23554e-07	7.97847e-07	0.147726	0.0497201	0.17229
Crybg1	486	2.28183e-07	8.13614e-07	0.0678281	0.103052	0.0922362
Taf13	570	2.34934e-07	8.3691e-07	0.16274	-0.0386413	0.0887912
Zfand2a	487	2.4322e-07	8.65629e-07	0.0324398	0.0520401	-0.00194667
Borcs6	515	2.506e-07	8.91074e-07	0.0168108	0.0441463	0.0983394
Ssb	573	2.5114e-07	8.92173e-07	0.181955	-0.0669639	-0.536538
Ckb	574	2.53701e-07	9.00439e-07	0.0681323	0.0279862	-0.0321678
Map4k4	489	2.55788e-07	9.07012e-07	0.0724849	0.0872904	-0.0633836
Sf3b3	490	2.74325e-07	9.71852e-07	0.0704699	0.110117	-0.12564
Map7d1	491	2.82608e-07	1.00028e-06	0.0801441	0.0928015	0.0444986
Rnf122	517	2.89498e-07	1.02372e-06	0.0503952	0.0784725	0.166758
Fetub	577	2.90147e-07	1.02508e-06	0.0843476	-0.00680982	-0.280457
Bex3	578	2.98616e-07	1.05404e-06	0.167021	0.0650382	-0.349425
Gclm	579	3.05647e-07	1.07787e-06	0.148978	0.056224	-0.0831816
Isoc1	519	3.0639e-07	1.0795e-06	0.0965006	0.0405502	0.158095
Dnajb9	520	3.07426e-07	1.08216e-06	0.016802	-0.0237278	0.180869
Phf13	493	3.09229e-07	1.08752e-06	0.00699091	0.0546443	0.0337989
Sp110	521	3.11601e-07	1.09467e-06	0.0779225	-0.0356325	0.105781
Thrsp	580	3.11829e-07	1.09467e-06	0.159884	-0.459117	0.0537579
Csdc2	522	3.1252e-07	1.09609e-06	-0.0264788	-0.0076094	0.0820032
Slc25a25	494	3.15919e-07	1.10701e-06	0.0154554	0.0572743	0.0518544
Sbds	495	3.17023e-07	1.10987e-06	-0.0223128	0.128835	0.136383
Srxn1	496	3.20085e-07	1.11957e-06	-0.0163967	0.0798825	-0.0891291
Stbd1	497	3.21012e-07	1.1218e-06	0.00218184	0.0495846	0.0339592
Kcnq1ot1	581	3.22724e-07	1.12676e-06	0.171222	0.101894	0.0993501
H2afz	582	3.25073e-07	1.13393e-06	0.198478	0.0221925	-1.97984
Coq9	583	3.26911e-07	1.13932e-06	0.142022	-0.158951	0.0853856
Ythdf2	498	3.37984e-07	1.17684e-06	0.0232181	0.0928819	0.0747818
Sfrp1	585	3.47254e-07	1.20803e-06	0.129153	0.0861534	-0.164966
Ube2h	499	3.59098e-07	1.24811e-06	0.0964772	0.105589	0.139947
Gm43672	524	3.60465e-07	1.25173e-06	-0.00728293	0.00851632	0.049644
Steap3	500	3.73521e-07	1.2959e-06	0.00980082	0.0333397	0.00394956
Ubash3b	501	3.75696e-07	1.30228e-06	0.0163483	0.0351007	0.0435103
Rbm25	502	3.85656e-07	1.3356e-06	0.133131	0.141563	-0.178238
Rad52	503	3.9048e-07	1.3511e-06	0.0149663	0.0598734	0.0298206
Pet100	589	3.95628e-07	1.36768e-06	0.143813	-0.0304151	0.0939662
Ptges3	504	3.98739e-07	1.3772e-06	0.139364	0.1281	-0.175928
Hspa2	525	4.00752e-07	1.38292e-06	0.0630409	0.0817534	0.19026
9530014B07Rik	590	4.01247e-07	1.38339e-06	0.0563726	-0.0357456	0.00752464
Bst2	591	4.07751e-07	1.40456e-06	0.181482	0.0527174	0.102745
H2-T23	527	4.16405e-07	1.43309e-06	-0.0812141	-0.0807097	0.255387
Susd6	528	4.25947e-07	1.46462e-06	0.00240347	0.0841215	0.126971
Nipal1	505	4.3262e-07	1.48624e-06	0.0221946	0.0284979	-0.00104593
Grhpr	594	4.34627e-07	1.49181e-06	0.163834	-0.16122	0.102362
Pcmtd1	531	4.42287e-07	1.51675e-06	-0.0355802	-0.0720232	0.164577
Inf2	506	4.52782e-07	1.55136e-06	0.052597	0.0653679	0.0746004
H2-Q7	596	4.53936e-07	1.55393e-06	0.173605	0.00609139	-0.145276
Lzts2	508	4.61283e-07	1.57769e-06	0.0631328	0.100729	0.0999883
Plekha1	509	4.6242e-07	1.58018e-06	0.0112381	0.0589105	0.0445269
Fam3a	532	4.74782e-07	1.62098e-06	0.0665037	-0.0412866	0.149273
Marveld3	598	4.93481e-07	1.68333e-06	0.143157	0.0354017	0.136214
Xpa	534	5.06078e-07	1.72478e-06	-0.0130896	-0.0153534	0.103031
Mpzl1	535	5.1817e-07	1.76443e-06	0.0886662	0.00686609	0.180501
Csnk1e	510	5.25456e-07	1.78766e-06	0.0435853	0.0889987	-0.00137455
Spp1	601	5.38133e-07	1.82918e-06	0.14176	0.0752105	0.0666813
Tmem160	602	5.38781e-07	1.82977e-06	0.152358	-0.00162015	0.0725969
Aldh3b2	536	5.45595e-07	1.85128e-06	0.087321	-0.162629	0.165239
Wnt5b	512	5.5366e-07	1.87586e-06	0.0534326	0.0594484	0.0673132
Slc3a2	513	5.53812e-07	1.87586e-06	-0.00650786	0.162704	0.227678
Hspd1	603	5.55304e-07	1.87927e-06	0.16438	0.0608228	-0.283479
Snx10	514	5.66421e-07	1.91521e-06	0.0660073	0.0969286	0.110642
Tspan14	606	5.83232e-07	1.97032e-06	0.142305	-0.178868	-0.013189
Syne4	592	5.91433e-07	1.99628e-06	0.158912	0.00217318	0.195114
Ugp2	608	6.12914e-07	2.06698e-06	0.134332	0.0318248	-0.0811486
Suv39h2	516	6.48836e-07	2.1843e-06	0.0201002	0.0432628	-0.0274079
Nav3	539	6.48626e-07	2.1843e-06	0.0532987	0.0647675	0.116643
Capn2	517	6.79787e-07	2.28451e-06	0.0474165	0.0728751	0.0574395
Entpd1	541	6.79333e-07	2.28451e-06	0.04929	0.000840768	0.0897239
Il17re	542	6.90407e-07	2.31818e-06	0.112141	-0.138235	0.18883
Rhoq	518	6.93163e-07	2.32541e-06	0.114924	0.123894	0.152782
Rnd1	519	7.31894e-07	2.45321e-06	-0.0217832	0.0710855	0.0432179
Pbxip1	545	7.48527e-07	2.50678e-06	-0.0432748	0.0261371	0.231089
Arid4b	521	7.52914e-07	2.51929e-06	0.0233667	0.119073	-0.00632642
Pdzrn3	615	7.56017e-07	2.52748e-06	0.0922381	0.0146411	0.0776197
Foxo1	522	7.61821e-07	2.54468e-06	-0.00550254	0.0963148	0.0571138
Kxd1	546	7.67104e-07	2.56011e-06	-0.00257609	-0.00328032	0.179713
Acss1	547	7.72737e-07	2.57668e-06	0.0989567	-0.152435	0.155381
Slc25a16	548	7.76115e-07	2.58571e-06	0.0951733	-0.0614682	0.126943
Eif4b	549	7.84355e-07	2.61091e-06	-0.0328123	0.035629	0.219945
Nktr	550	7.98778e-07	2.65663e-06	0.0473487	0.0030943	0.196134
Sdc3	551	8.33977e-07	2.7713e-06	0.0616563	0.0470643	0.0960512
Zfp428	523	8.39121e-07	2.786e-06	0.0473298	0.0655166	0.0571117
Atp6ap2	552	8.42348e-07	2.79431e-06	0.0544107	0.0655836	0.208336
Rps12-ps3	608	8.78155e-07	2.91059e-06	0.140355	0.0597112	0.160271
Gstt3	553	9.15477e-07	3.03168e-06	0.116682	-0.121092	0.190216
Retreg1	620	9.2498e-07	3.06053e-06	0.157751	-0.151155	0.115606
Ass1	554	9.31798e-07	3.08044e-06	0.0922792	0.0521698	0.201689
Fubp1	524	9.39153e-07	3.1021e-06	0.107699	0.114909	-0.238464
Pon3	555	9.69902e-07	3.20092e-06	0.0574351	-0.0541069	0.0964059
Spen	556	9.72678e-07	3.20734e-06	-0.0352461	0.0267717	0.0606133
Mbnl2	621	9.81624e-07	3.23408e-06	0.154196	0.0775535	0.0777341
Nsd2	525	9.82583e-07	3.23447e-06	0.0425487	0.0744688	-0.104714
Hmgn5	622	9.91341e-07	3.26052e-06	0.12111	-0.0357353	-0.407865
Ahr	528	1.01484e-06	3.33497e-06	0.0406191	0.0714428	0.0505879
Ddit4	529	1.02042e-06	3.35045e-06	0.0919177	0.122537	0.177098
Csrp1	558	1.05585e-06	3.46385e-06	-0.181296	0.113311	0.197362
Dynlt1f	627	1.08438e-06	3.55441e-06	0.0870951	-0.0132138	-0.615891
Parp6	531	1.08743e-06	3.56139e-06	0.0735454	0.0853866	0.0606635
Adrm1	628	1.09384e-06	3.57934e-06	0.149996	0.004627	-0.136264
Dnajb4	534	1.15872e-06	3.78841e-06	0.0504053	0.0771944	0.0108217
Srgn	629	1.17695e-06	3.84477e-06	0.0507226	0.0419606	0.00817438
Mocos	630	1.1803e-06	3.85246e-06	0.0783441	-0.0738299	0.0281954
Fxyd6	535	1.18802e-06	3.87438e-06	-0.132481	0.134445	-0.138106
Efna5	536	1.19738e-06	3.90159e-06	0.00980144	0.0333853	0.000157705
Slc22a4	562	1.25487e-06	4.08547e-06	0.0329772	0.0469915	0.0917037
Sowahc	538	1.25844e-06	4.09341e-06	0.0194485	0.0485102	0.0431145
Dhrs3	563	1.25943e-06	4.09341e-06	-0.245011	-0.146852	0.141453
Plp2	539	1.31877e-06	4.28266e-06	0.142114	0.134677	-0.148209
Lpin2	540	1.3364e-06	4.33626e-06	0.0326592	0.0472196	-0.0128974
Tcp11l2	565	1.3674e-06	4.43314e-06	0.0119639	0.0459452	0.121954
Gas2l1	541	1.48104e-06	4.79752e-06	0.0368666	0.0584175	0.0263523
Ccdc186	570	1.54978e-06	5.01597e-06	0.069673	0.0920116	0.145965
Rabgef1	571	1.55309e-06	5.02249e-06	0.00773734	0.0647406	0.0981376
Sfr1	542	1.56227e-06	5.04793e-06	0.121795	0.136596	-0.0559591
Paqr6	573	1.57751e-06	5.09292e-06	-0.0126227	-0.0468498	0.15777
Ero1l	543	1.65647e-06	5.34336e-06	-0.00587473	0.0946848	-0.166298
Rp9	574	1.6887e-06	5.44279e-06	-0.108786	-0.050215	0.195921
Rab15	576	1.74602e-06	5.62283e-06	0.117791	0.0958416	0.182476
Cry1	546	1.78991e-06	5.75937e-06	0.0131642	0.0709945	0.0877523
C4b	547	1.79282e-06	5.76391e-06	0.00524723	0.0523408	0.043734
Cyb5r2	598	1.82135e-06	5.85076e-06	0.079526	-0.033006	0.0987698
Phtf2	578	1.85685e-06	5.95983e-06	0.00839423	0.0127692	0.0372199
Csde1	548	1.89328e-06	6.07171e-06	0.0890575	0.127014	0.00873625
Phc3	580	1.99773e-06	6.40136e-06	-0.00245777	0.0368777	0.0831113
Wsb2	549	2.00263e-06	6.41175e-06	0.0384865	0.0930412	0.00436991
Gapdh	550	2.01686e-06	6.45193e-06	0.0783394	0.124975	-0.568657
Vps37b	552	2.03628e-06	6.50868e-06	0.0359989	0.0775528	0.033862
Zc3h7a	553	2.05033e-06	6.54817e-06	0.0299782	0.0867903	0.101618
Slc43a2	581	2.0628e-06	6.58253e-06	0.0285952	-0.0175085	0.0805198
Kdm6b	554	2.14098e-06	6.82638e-06	-0.0583129	0.0822518	-0.00253974
Cdkn1c	583	2.1633e-06	6.89184e-06	0.0479326	0.0214927	0.163951
Celsr2	555	2.26157e-06	7.19895e-06	0.0368174	0.105242	0.0972875
Lars	646	2.28989e-06	7.2831e-06	0.107045	0.0349003	-0.0383927
Uhrf2	557	2.35313e-06	7.47808e-06	0.0197503	0.086952	-0.00679178
Flvcr2	647	2.38885e-06	7.58533e-06	0.0814398	-0.201437	0.0411919
Prpf40a	648	2.42206e-06	7.68448e-06	0.144558	-0.00139397	-0.235909
Vasn	558	2.4519e-06	7.77274e-06	0.0259837	0.0593317	0.0492485
Atp6v1c2	651	2.56677e-06	8.13021e-06	0.0696151	0.0252364	-0.0126233
Specc1	560	2.6031e-06	8.23852e-06	0.00808752	0.0537476	-0.00879991
Msl1	561	2.62449e-06	8.29941e-06	0.06249	0.0916132	0.111462
Rras	562	2.66188e-06	8.41076e-06	0.0190901	0.0927805	0.110208
Cox8b	586	2.67487e-06	8.44489e-06	-0.122744	-0.00259493	0.0599261
Appl2	589	2.68257e-06	8.46228e-06	-0.159742	-0.0627218	0.135335
Elmo1	652	2.76934e-06	8.72886e-06	0.120536	-0.0377511	0.0569708
Itga6	563	2.80327e-06	8.82858e-06	0.067737	0.120531	0.167547
Gnl3	564	2.81065e-06	8.84461e-06	0.06026	0.123511	-0.0701946
Gpbp1l1	593	2.93451e-06	9.22684e-06	0.00766386	0.017567	0.103463
Hmgb3	653	2.93707e-06	9.22736e-06	0.117686	0.0680421	-0.153188
Btbd9	596	3.12924e-06	9.81879e-06	0.0169856	0.0456628	0.0963342
Lrrc26	654	3.13041e-06	9.81879e-06	0.106986	-0.171935	0.0035659
Palld	567	3.25932e-06	1.02148e-05	-0.00275361	0.0508991	0.0327925
Mtdh	655	3.45987e-06	1.08346e-05	0.150884	-0.00189478	-0.218348
Hdac7	599	3.54819e-06	1.11021e-05	0.0121	0.0177201	0.0300198
Rbm47	600	3.59382e-06	1.12358e-05	-0.00524113	0.019485	0.172828
Rell1	658	3.72174e-06	1.16263e-05	0.0736517	0.0594522	-0.181589
Oxnad1	570	3.73916e-06	1.16713e-05	0.0750095	0.0783497	0.0389465
Tkt	659	3.77185e-06	1.17638e-05	0.178472	-0.0435148	-0.217553
Ubr5	572	3.85958e-06	1.20277e-05	-0.00430383	0.0746272	0.00907585
Cotl1	661	3.88155e-06	1.20864e-05	0.155792	-0.106949	-0.0824147
Neu1	602	3.92032e-06	1.21972e-05	0.0816052	0.0364286	0.179172
Slc38a3	662	3.96711e-06	1.23329e-05	0.0887188	-0.0257855	0.0834591
Tardbp	575	3.99628e-06	1.24136e-05	0.0359351	0.0988103	-0.0936187
Trim8	605	4.03517e-06	1.25142e-05	-0.024836	-0.102164	0.152876
Stard5	663	4.03352e-06	1.25142e-05	0.0947928	-0.0886131	0.0042125
Cebpa	606	4.04259e-06	1.25272e-05	-0.0113138	-0.0196192	0.0382995
Gm15867	607	4.14471e-06	1.28333e-05	0.0121655	0.0588898	0.111757
AI661453	577	4.25791e-06	1.31732e-05	0.0357914	0.0486492	0.0530003
Smarca5	579	4.6091e-06	1.42483e-05	0.0663207	0.103989	-0.231557
Bik	609	4.69887e-06	1.45142e-05	-0.107236	-0.0136384	0.109165
Heca	580	4.73936e-06	1.46276e-05	0.00440273	0.0474204	0.0284311
Cfb	610	4.77486e-06	1.47253e-05	0.00623916	0.0196672	0.0257419
Sidt1	611	4.94045e-06	1.52239e-05	-0.131541	-0.076297	0.111191
Aplp2	612	4.9863e-06	1.53529e-05	0.0581013	0.0874309	0.215835
Irx2	613	5.00152e-06	1.53874e-05	-0.0457826	-0.163524	0.159289
Mpst	614	5.00595e-06	1.53888e-05	0.0205269	0.0259666	0.200377
Myh14	581	5.0264e-06	1.54394e-05	0.0286674	0.0568828	0.0464313
Aff4	616	5.16224e-06	1.5844e-05	0.0356472	0.0570448	0.158521
Lrrc8e	617	5.20282e-06	1.59559e-05	0.0272433	0.0214484	0.0458905
Spc24	668	5.29734e-06	1.62328e-05	0.0409443	0.00925534	-0.664531
Tgfbr1	583	5.39109e-06	1.6507e-05	0.023066	0.0605586	0.0670124
Hivep1	584	5.4066e-06	1.65414e-05	0.0203644	0.0426639	0.0358353
Itpr3	669	5.52615e-06	1.68937e-05	0.1093	0.0121412	0.0667651
Oxct1	670	5.58048e-06	1.70463e-05	0.152183	-0.0299769	-0.150582
Chrnb1	585	5.68384e-06	1.73483e-05	0.0415919	0.0581797	0.0661144
Papln	620	5.69714e-06	1.73751e-05	0.102704	0.0210782	0.145108
Bcl9	653	5.7038e-06	1.73817e-05	0.0855213	0.0742538	0.079046
Baz2b	586	5.779e-06	1.7597e-05	0.0342556	0.110667	0.00809868
Abca3	672	6.05594e-06	1.84257e-05	0.0890089	0.0319035	-0.0387965
Gm2000	673	6.24611e-06	1.89894e-05	0.136568	0.0365549	-0.0160324
0610040J01Rik	674	6.26542e-06	1.90331e-05	0.0779744	-0.0201746	-0.0352864
Snhg18	675	6.27949e-06	1.90608e-05	0.121631	0.00898663	0.0539781
Actr2	589	6.34983e-06	1.92591e-05	0.0769479	0.0757716	0.0522556
Col12a1	590	6.3664e-06	1.92943e-05	0.0224851	0.0312122	0.0245902
Fgfr1	624	6.465e-06	1.95777e-05	-0.00701348	-0.0141967	0.151778
Cdk2ap2	676	6.58103e-06	1.99134e-05	0.135479	-0.0779874	-0.0253838
Srsf7	591	6.8516e-06	2.07159e-05	0.120125	0.119613	-0.226002
Batf	626	6.94292e-06	2.09756e-05	0.0278351	0.0284338	0.0341563
Dpysl2	677	6.96375e-06	2.1022e-05	0.0338339	0.0307496	-0.0419955
Pigr	628	7.41111e-06	2.2355e-05	0.0449489	0.0191158	0.10824
Tmem109	680	7.43958e-06	2.24234e-05	0.121102	-0.0616795	-0.285973
Ly6d	629	7.74345e-06	2.3321e-05	-0.368508	0.0060486	0.0925675
Arhgef26	593	7.82937e-06	2.35614e-05	0.00575626	0.0627251	0.0522823
Rara	594	7.93024e-06	2.38464e-05	-0.00226937	0.0541325	0.0514259
Cnpy3	682	8.33969e-06	2.5058e-05	0.102848	-0.0898831	0.0488887
Rtn1	683	8.35888e-06	2.50961e-05	0.105585	-0.00775464	-0.0651504
Ripk1	598	8.51523e-06	2.55457e-05	0.0100323	0.064725	0.0401093
Ythdc1	599	8.61272e-06	2.58181e-05	-0.0177374	0.0984419	-0.0409484
Tra2b	600	8.71375e-06	2.61006e-05	0.0325475	0.113313	-0.0731802
Tc2n	684	8.83654e-06	2.64479e-05	0.0965005	-0.160755	-0.0968863
Fcgbp	635	9.22029e-06	2.75751e-05	-0.0328304	0.00120738	0.0221785
Cenpw	685	9.3156e-06	2.78386e-05	0.0401822	0.0162975	-0.667897
Raph1	602	9.37617e-06	2.79889e-05	-0.0210541	0.0667004	-0.0369074
Gm16286	686	9.38041e-06	2.79889e-05	0.157695	-0.0583945	0.0765537
Foxo3	605	9.75968e-06	2.9098e-05	0.0463666	0.0748242	0.0135662
Mthfd2	606	9.80615e-06	2.9214e-05	0.0254119	0.054185	-0.131954
Dync1i2	687	9.83488e-06	2.9277e-05	0.125226	0.0556338	-0.0831201
Cox7a1	639	1.02335e-05	3.04401e-05	0.0635131	-0.0340826	0.133321
Cyr61	607	1.04699e-05	3.11192e-05	0.00176427	0.147492	0.128962
Grrp1	690	1.04894e-05	3.11533e-05	0.083045	0.0459871	0.034793
G3bp1	633	1.06724e-05	3.16724e-05	0.13546	0.10417	-0.13889
Acaca	692	1.09001e-05	3.23233e-05	0.0684667	0.0252716	-0.0174063
Fbln2	609	1.0916e-05	3.23456e-05	0.0501662	0.0860746	0.102007
Hist1h4h	641	1.10532e-05	3.2727e-05	-0.0550806	-0.0198728	0.100133
Rhov	610	1.1128e-05	3.29233e-05	0.0309916	0.0483439	0.0296762
Gna13	611	1.12915e-05	3.33625e-05	0.0169397	0.0848333	0.0417279
Irgm1	612	1.12938e-05	3.33625e-05	0.0395538	0.0594538	0.0561676
Taf1d	613	1.13325e-05	3.34511e-05	0.141226	0.138344	0.119015
Saa1	614	1.13862e-05	3.3584e-05	0.0443837	0.0732934	0.0666691
Pnpo	642	1.14562e-05	3.37646e-05	0.00315148	-0.0277048	0.101468
Cox20	697	1.18571e-05	3.49195e-05	0.13881	-0.124059	0.130935
Wdr72	645	1.22785e-05	3.6133e-05	0.00524766	0.00532548	0.0478501
Gbp7	615	1.30175e-05	3.82786e-05	0.0687757	0.0738383	0.0669195
Pkp3	616	1.31078e-05	3.85148e-05	0.0819826	0.0916511	0.0990483
Tfe3	617	1.31556e-05	3.86258e-05	0.0244432	0.062943	0.0573255
Mthfd2l	648	1.3314e-05	3.90612e-05	0.0897219	-0.033669	0.141248
Plekhn1	649	1.34762e-05	3.95071e-05	-0.0209523	-0.00158363	0.0649647
Gm32591	651	1.35681e-05	3.97462e-05	0.00125423	-0.0197359	0.0246162
Hk2	652	1.40265e-05	4.10577e-05	0.00250484	0.0200051	0.0953107
Kpna4	618	1.43496e-05	4.19718e-05	0.021566	0.0685955	0.0115145
Chd1	619	1.48354e-05	4.3357e-05	-0.0240029	0.0706815	0.00887919
Pgpep1	702	1.48457e-05	4.3357e-05	0.0892627	0.00992318	0.088958
Csprs	654	1.49721e-05	4.36933e-05	-0.0660907	-0.0269626	0.0376088
Galnt3	704	1.52297e-05	4.44113e-05	0.140726	0.031444	0.10252
Phf1	656	1.57536e-05	4.59043e-05	-0.0721071	0.0183967	0.0757132
Rchy1	706	1.58363e-05	4.61107e-05	0.116679	0.0280287	-0.0247614
Enpp3	707	1.58797e-05	4.62019e-05	0.110338	-0.018094	0.08797
Shisa8	708	1.60077e-05	4.65393e-05	0.0641933	-0.0300818	-0.101849
H2-Ke6	709	1.64633e-05	4.78279e-05	0.124416	-0.0467609	0.0646528
1300017J02Rik	710	1.661e-05	4.82177e-05	0.0478483	0.00150859	0.0446641
Wfdc3	659	1.69001e-05	4.9023e-05	0.00363086	0.0204631	0.040489
Mier1	622	1.69382e-05	4.90966e-05	0.00889386	0.0926404	0.0606929
Kif5c	660	1.70781e-05	4.94649e-05	-0.0231594	-0.0290885	0.0605872
Fermt1	711	1.72317e-05	4.98725e-05	0.104739	0.0452112	0.0480103
Slc5a9	661	1.74096e-05	5.03494e-05	0.0377807	0.0188423	0.0805224
Qk	623	1.75144e-05	5.06147e-05	0.0277005	0.0634924	0.00567747
Traf4	715	1.76618e-05	5.10024e-05	0.108004	-0.012064	-0.105868
Nfe2l2	625	1.80953e-05	5.2215e-05	0.0257598	0.0802818	-0.0613477
Gm26881	663	1.84841e-05	5.32971e-05	0.0121342	-0.00368151	0.0326518
Tra2a	626	1.91956e-05	5.53075e-05	0.0251127	0.109495	0.075394
Pip5k1a	627	1.93827e-05	5.58047e-05	0.0189063	0.0709796	0.0247027
Foxq1	628	2.01265e-05	5.79032e-05	-0.00751173	0.0147008	0.0132106
Atg16l2	629	2.0227e-05	5.81476e-05	0.0240885	0.0404051	0.0268031
Smoc1	666	2.02416e-05	5.81476e-05	0.0236298	0.00969823	0.0505402
Gm17619	668	2.04811e-05	5.87918e-05	0.0322753	-0.0257924	0.0982748
Tmem79	720	2.05876e-05	5.90536e-05	0.105371	-0.0139801	-0.00959485
Ctnnb1	721	2.06147e-05	5.90873e-05	0.130012	0.0434331	-0.102507
Tmc4	670	2.09165e-05	5.99079e-05	0.0764356	0.0721163	0.224195
Mb	671	2.11223e-05	6.04524e-05	0.0338756	-9.76258e-05	0.0617423
Mkrn1	673	2.13349e-05	6.10155e-05	-0.0870629	0.0832575	0.18884
Tmem65	631	2.14446e-05	6.1284e-05	0.0155777	0.0571278	0.0334958
Tead2	675	2.19191e-05	6.25934e-05	-0.0652027	-0.0581651	0.148006
Dennd4a	632	2.23128e-05	6.36706e-05	0.0126233	0.051437	0.0341618
Fam102a	635	2.26682e-05	6.46372e-05	0.0239971	0.0531729	0.0465751
Slc35d3	678	2.29982e-05	6.55295e-05	0.0598233	0.0118725	0.0703258
Chd7	663	2.41925e-05	6.88817e-05	0.0427399	0.0655831	0.0989931
Etv5	723	2.42464e-05	6.89841e-05	0.10763	-0.24306	-0.0296774
Eif3a	638	2.57518e-05	7.32132e-05	0.123081	0.119143	-0.073648
AL590144.2	681	2.58636e-05	7.3477e-05	0.000414232	0.00379626	0.067437
Tnfaip1	639	2.6149e-05	7.42331e-05	0.0874561	0.0833227	-0.0201354
Zcchc2	640	2.62204e-05	7.4381e-05	-0.00435203	0.0453057	0.00662756
Lgalsl	683	2.6265e-05	7.4453e-05	0.0729717	0.0573738	0.122654
Prdm4	641	2.63293e-05	7.45804e-05	0.00486599	0.0305101	-0.00937761
Dctn4	685	2.64678e-05	7.49176e-05	0.04195	0.0679314	0.109472
Cgnl1	686	2.68511e-05	7.59469e-05	0.114861	-0.129174	0.154649
Kpna2	642	2.68783e-05	7.59681e-05	0.0183063	0.0384046	-0.101001
Fnip1	643	2.75891e-05	7.792e-05	0.0168763	0.0505974	0.0338683
Dusp3	725	2.77661e-05	7.83625e-05	0.0798686	0.0496487	0.044263
Rsrc2	644	2.78507e-05	7.8544e-05	0.0543449	0.121206	0.0880068
Kdm1a	645	2.7906e-05	7.86423e-05	0.0708814	0.0809429	0.0826622
Ifnar2	687	2.79951e-05	7.8836e-05	0.10326	0.0131894	0.138428
Trabd2b	727	2.94208e-05	8.27902e-05	0.0716154	0.0137231	-0.00359739
Tk1	728	2.95015e-05	8.29569e-05	0.0309896	-0.0252113	-0.668912
Arhgap10	730	2.96354e-05	8.32727e-05	0.0650146	0.0384875	-0.00988814
Med13l	646	3.01732e-05	8.47223e-05	-0.0104607	0.0662487	0.0460465
Unc5cl	690	3.02673e-05	8.49244e-05	0.0266474	0.0351175	0.0419031
Cd164	647	3.09223e-05	8.66992e-05	0.10201	0.114946	0.0414422
Lactb	691	3.1254e-05	8.75656e-05	0.0406083	0.0387183	0.0522787
Ccnl2	692	3.15281e-05	8.82695e-05	0.0210131	0.0835161	0.135814
Med15	648	3.19068e-05	8.92651e-05	0.00277792	0.0613679	0.0282123
Samd5	694	3.19644e-05	8.93036e-05	0.00835412	0.0143434	0.0170836
Neo1	732	3.19669e-05	8.93036e-05	0.0582934	0.011931	0.0534554
Tubb4b	733	3.23412e-05	9.0284e-05	0.176945	0.112555	-0.682948
Sash1	695	3.2388e-05	9.03491e-05	-0.116671	-0.0131167	0.113712
2810001G20Rik	734	3.25573e-05	9.07558e-05	0.0838477	-0.114268	-0.209606
Uba7	696	3.28867e-05	9.16079e-05	-0.00388338	-0.00124778	0.0252386
Gas2l3	649	3.33353e-05	9.27905e-05	0.0106062	0.01831	-0.0300567
1810043G02Rik	719	3.34046e-05	9.29163e-05	0.14381	-0.270042	0.207019
Vat1	698	3.41115e-05	9.48143e-05	0.0735132	0.0297695	0.142407
Arhgef40	650	3.42907e-05	9.52438e-05	0.0100349	0.0340646	0.013448
1810013L24Rik	651	3.4979e-05	9.70855e-05	0.0313191	0.059092	0.0597148
Timd2	699	3.53954e-05	9.81708e-05	0.0580688	-0.0360811	0.0844516
Rmdn1	701	3.58169e-05	9.92685e-05	0.0127345	-0.0685303	0.113514
Epb41l4aos	702	3.60126e-05	9.97392e-05	-0.095594	0.064696	0.133159
Cradd	739	3.6724e-05	0.000101637	0.105414	-0.0595388	0.115356
Daam1	652	3.68753e-05	0.000101982	0.0604401	0.0882183	0.0773905
Kif21a	740	3.73147e-05	0.000103123	0.103232	0.0644556	-0.0570826
Scara5	704	3.74193e-05	0.000103338	0.0533274	-0.0258677	0.100813
Zmym5	654	3.77139e-05	0.000104078	0.0170423	0.0771018	0.10071
Rhoj	741	3.78511e-05	0.000104381	0.0610491	0.024473	0.000977764
Josd2	743	3.79519e-05	0.000104585	0.128164	-0.026587	-0.0160661
Ezh2	688	3.81036e-05	0.000104928	0.0709143	0.0643557	-0.240817
Ccnb2	744	3.81454e-05	0.000104968	0.0278693	0.0117216	-0.719599
Parp14	705	3.88471e-05	0.000106823	-0.000771097	0.0363438	0.0539456
Fen1	745	3.92875e-05	0.000107957	0.0526425	0.0243219	-0.2892
Ankrd11	655	4.03076e-05	0.000110602	0.0287273	0.105092	0.0241107
Mup6	706	4.0302e-05	0.000110602	-0.0197169	-0.0523584	0.0620816
Manba	656	4.06828e-05	0.000111552	0.00652801	0.0276128	0.0086935
Gnl1	657	4.1142e-05	0.000112731	0.0209287	0.073728	-5.03149e-05
Tia1	746	4.14648e-05	0.000113535	0.0777957	0.0361224	0.0100152
Ifi47	708	4.15784e-05	0.000113766	0.0701462	0.0737346	0.0888377
Hsbp1l1	709	4.18241e-05	0.000114357	0.040745	-0.127551	0.125637
Fam13a	710	4.2549e-05	0.000116256	-0.0205109	-0.151353	0.201263
Plscr2	752	4.42544e-05	0.00012083	0.0645685	0.0469241	0.0137785
Nrm	753	4.43135e-05	0.000120906	0.0306127	0.0179909	-0.434967
Lifr	712	4.50484e-05	0.000122824	-0.0280315	-0.0169361	0.0480097
Nxf7	754	4.50903e-05	0.000122852	0.0645586	0.0169779	0.0605923
Bdp1	659	4.53961e-05	0.000123598	0.0285183	0.0628146	-0.00895278
Klf4	660	4.57269e-05	0.000124411	-0.0921883	0.0444327	0.0413134
Igsf8	661	4.60175e-05	0.000125113	-0.0406484	0.10647	0.117831
Ankrd22	713	4.63872e-05	0.000126029	0.00683162	0.0314463	0.0547424
Shroom1	716	4.78612e-05	0.000129943	-0.0158973	-0.000222228	0.0342304
Swap70	700	4.79953e-05	0.000130215	0.0528875	0.0493155	0.0167538
Inhbb	718	4.80583e-05	0.000130294	-0.150134	-0.189791	0.112895
Serpine2	731	4.82765e-05	0.000130794	0.0682032	0.0525684	-0.1813
Tk2	720	4.9944e-05	0.000135217	-0.0237212	-0.0307834	0.0545526
Rtkn	758	5.13804e-05	0.000139008	0.0986376	0.0492118	0.113545
Prr5l	664	5.19155e-05	0.000140358	0.00932692	0.026879	0.026591
Cep170b	665	5.20114e-05	0.000140518	0.00781309	0.0614709	0.0330216
Nsd3	666	5.24168e-05	0.000141514	0.0335966	0.0915777	0.0871263
Ypel2	723	5.25372e-05	0.00014174	0.0170097	0.00400328	0.0378522
Aftph	667	5.26688e-05	0.000141996	0.0283382	0.080022	0.0896293
A2m	705	5.29294e-05	0.000142599	-0.0206005	0.0451064	0.0570367
Thap3	725	5.37668e-05	0.000144683	-0.110761	-0.0920615	0.089134
Itpr2	726	5.37779e-05	0.000144683	-0.0117828	0.0193116	0.125512
Rab20	668	5.44432e-05	0.000146371	0.0291034	0.0806453	0.0834974
Gm35909	669	5.49178e-05	0.000147544	0.0382563	0.0412284	-0.0255261
Scap	728	5.54417e-05	0.000148848	0.0333165	0.00653474	0.0959149
Lyg1	765	5.55652e-05	0.000149076	0.0253392	0.010969	-0.0247871
Gnai2	729	5.63207e-05	0.000150997	0.107954	0.111098	0.186529
Kcnn4	767	5.72598e-05	0.000153409	0.180901	-0.526035	0.0997296
Plod1	768	5.90827e-05	0.000158183	0.107646	0.0724854	0.0327525
Usp19	670	5.91354e-05	0.000158214	0.0312252	0.0637074	0.0794063
Gata3	733	5.93695e-05	0.00015873	-0.00799073	-0.382125	0.131491
Nr4a2	671	6.08861e-05	0.000162672	0.0322152	0.0438085	0.00859254
Ctnnd1	672	6.10386e-05	0.000162967	0.0550997	0.0878402	0.00516839
Mrpl18	772	6.12183e-05	0.000163333	0.106719	-0.196858	-0.507499
Lurap1l	734	6.19443e-05	0.000165156	0.0763479	0.0769741	0.126751
Ubald1	735	6.21665e-05	0.000165634	0.0138325	0.0546651	0.109898
Phf3	675	6.31958e-05	0.000168261	0.00723207	0.0790673	0.0496076
Large2	774	6.36685e-05	0.000169402	0.0636496	-0.0367143	-0.0207977
Frmd6	676	6.40022e-05	0.000170173	-0.00357832	0.0398188	0.00781573
Nipa2	677	6.43479e-05	0.000170974	0.0352581	0.0629497	-0.0195944
Amotl1	678	6.45368e-05	0.000171358	0.0886296	0.0873779	0.0712029
Mcm6	776	6.59545e-05	0.000175002	0.0378962	-0.00499784	-0.457916
Cavin2	780	6.89039e-05	0.000182702	0.0753854	-0.0671967	-0.187765
Eif4g1	783	7.02868e-05	0.000186241	0.113184	0.042971	-0.0802921
Tpd52l2	682	7.07866e-05	0.000187436	0.054514	0.102774	-0.0298427
Dnajb5	683	7.15904e-05	0.000189435	0.00913861	0.0229733	0.0148695
Limd2	786	7.2504e-05	0.000191721	0.112842	-0.0173617	-0.0632776
Lmo4	787	7.25686e-05	0.00019176	0.156433	-0.842298	-0.292366
Setd7	684	7.26794e-05	0.000191921	0.0510924	0.064351	0.0615372
mt-Nd3	685	7.35982e-05	0.000194215	0.127603	0.120923	-0.114613
Larp4b	686	7.45451e-05	0.000196579	0.0276484	0.0809658	-0.0623034
Rybp	687	7.61643e-05	0.000200712	0.0392854	0.0562815	0.0550456
Maged1	792	7.85672e-05	0.000206903	0.120677	0.0199337	0.0342162
Zfp704	690	7.90827e-05	0.000208118	-0.0491824	0.0468403	0.047473
Clk4	691	7.95301e-05	0.000209153	-0.0337791	0.0764411	0.0656844
Iqcc	742	8.03989e-05	0.000211294	-0.0181799	-0.0455626	0.0772976
Afdn	694	8.4215e-05	0.000221172	0.0394538	0.0733426	0.074461
Gnao1	745	8.48379e-05	0.000222656	0.00772638	0.0110942	0.0343309
Ppt1	746	8.52049e-05	0.000223467	0.00866584	-0.0547074	0.174591
Scube1	747	8.54226e-05	0.000223886	-0.0194696	0.00569534	0.0287505
Ifih1	749	8.66415e-05	0.000226926	0.0415828	0.0463061	0.0806501
Spaca6	695	8.71997e-05	0.000228234	0.0148961	0.0487453	0.0257735
Neu2	750	8.73964e-05	0.000228465	-0.0337962	-0.0308813	0.0303084
Gm47015	794	8.74065e-05	0.000228465	0.0592166	-0.000566139	0.0214975
Spns2	751	8.86075e-05	0.000231291	0.0442811	0.0100414	0.0904537
Clip1	796	8.85686e-05	0.000231291	0.092596	0.0153687	0.0195379
Heg1	752	8.92526e-05	0.000232817	-0.0445826	0.04209	0.0696657
Comp	698	9.09592e-05	0.000237108	0.0837728	0.15724	-0.302479
Col16a1	699	9.28654e-05	0.000241914	0.032726	0.0423654	0.0499326
Il18r1	736	9.344e-05	0.000243247	0.0143971	0.0220599	0.0228557
Psme1	801	9.38926e-05	0.00024426	0.141859	0.0898013	0.0265729
Rpa2	802	9.52507e-05	0.000247626	0.0617711	-0.0212146	-0.390079
Zbtb2	701	9.66874e-05	0.000251192	0.00456854	0.0333974	0.0252526
Ppp1r10	702	9.72846e-05	0.000252573	0.00283603	0.0574855	0.0363681
F2rl1	704	9.8115e-05	0.000254558	0.0172923	0.0322763	0.0204514
Gm1673	803	9.9659e-05	0.00025839	0.0749176	0.0366818	-0.0247374
Irak2	760	0.000105969	0.000274566	-0.0225843	0.00770064	0.0466566
Pum2	706	0.000111092	0.000287645	0.0324471	0.0729126	-0.00272427
Clstn1	764	0.000112771	0.000291797	0.0798402	0.0347265	0.135696
Rfc5	809	0.000113341	0.000293075	0.0519085	-0.00697916	-0.415562
Igf1r	767	0.000115885	0.000299455	-0.0491655	0.00614778	0.0414281
Egr3	708	0.00011622	0.000300119	0.0202283	0.0221738	0.00956045
Hnrnpdl	710	0.000118649	0.000306186	0.0510193	0.0912721	-0.156153
Dennd5a	711	0.000119303	0.000307668	0.0449596	0.0495999	0.0455293
Armcx2	813	0.000119671	0.000308412	0.0392805	0.0292805	0.0174818
Tspan7	769	0.000122155	0.000314601	0.0775308	-0.00296319	0.131607
Ptbp2	714	0.000122897	0.000316303	0.00175926	0.0450908	-0.00830413
Ube2s	814	0.000123645	0.000318015	0.135262	0.080707	-0.961645
Ip6k1	770	0.00012375	0.000318074	-0.0185487	0.0230509	0.0782514
Sh3yl1	815	0.000124027	0.000318573	0.0820429	-0.0459349	0.102249
Map3k6	716	0.000125474	0.000322074	0.000296883	0.0193136	0.00426023
Sorl1	772	0.000127848	0.000327951	-0.00547071	-0.0445847	0.113899
Cspp1	718	0.000128616	0.000329701	0.0186757	0.0535292	0.000491464
Ip6k2	781	0.000133893	0.000343001	0.0770082	0.0435257	0.0989919
2310039H08Rik	820	0.000135789	0.000347626	0.108288	-0.139427	0.133008
Ngef	776	0.000139747	0.000357521	-0.0189646	-0.00338403	0.0310226
Srsf2	720	0.000141958	0.00036294	0.0507102	0.110127	-0.374862
Pacsin3	721	0.000144017	0.000367958	-0.0210971	0.0761261	0.0258903
Cecr2	722	0.000145655	0.000371897	0.00544935	0.0374753	0.0441126
Lamb2	780	0.000146655	0.000374203	-0.00032658	0.0382193	0.105204
Gm20234	782	0.000148795	0.000379413	0.0112754	0.00165629	0.0195711
Ddx17	723	0.000151797	0.000386811	0.0188796	0.0859075	0.0733997
Atf6	805	0.000154378	0.000393128	0.0633454	0.0528951	0.0527189
Wasf2	824	0.000154503	0.000393187	0.10801	0.0693444	0.0960239
Spop	784	0.000154889	0.000393909	0.00368084	-0.0486771	0.117008
Gpcpd1	725	0.00015646	0.000397644	0.0268133	0.0454198	-0.0339298
Map2k3os	727	0.000157635	0.000400367	0.0119569	0.0344093	0.0285746
Scin	747	0.000161246	0.000409267	9.82209e-06	0.0261572	0.033769
Muc1	730	0.000164641	0.000417335	0.00783299	0.0316546	0.0275542
Snrpa1	827	0.000164639	0.000417335	0.0952036	-0.000548335	-0.261437
Aaed1	787	0.000171675	0.000434879	-0.0120819	0.0165927	0.106026
Gm4951	829	0.000172105	0.000435684	0.0269617	0.01282	0.0178292
Plekho2	788	0.000173559	0.000439076	-0.00561526	0.00871089	0.0471779
Sdc2	830	0.000176158	0.000445359	0.111742	-0.0672706	0.0113614
Thap4	832	0.000177892	0.000449447	0.083034	-0.0528624	-0.0634498
4430402I18Rik	732	0.000180153	0.000454862	0.0271974	0.0430964	0.0183693
Klf11	733	0.000181239	0.000457305	0.0152217	0.0421522	0.0385365
Gm45589	834	0.000182929	0.000461267	0.0849529	-0.0436827	0.085444
Luzp1	735	0.000185248	0.00046681	0.0635467	0.0902451	0.100197
Zbtb38	835	0.000185644	0.000467504	0.0723924	0.0579496	0.0354867
Map3k14	737	0.00018756	0.00047202	0.026731	0.042294	0.0424772
Gatad2b	738	0.000188015	0.000472856	0.038674	0.0753082	-0.0183468
Kit	837	0.000189586	0.000476496	0.092811	-0.00777604	0.035601
Lysmd3	739	0.000190174	0.000477665	-0.00824273	0.0352799	0.020298
Sel1l	838	0.000190966	0.00047934	0.0927771	-0.093083	-0.0600417
Tiparp	740	0.000195153	0.000489532	-0.0235713	0.0654471	0.0565113
Sesn3	795	0.000198422	0.000497408	0.0310898	0.00262626	0.0975635
Slc6a8	742	0.000199505	0.000499799	-0.0408134	0.0851796	0.120283
E130102H24Rik	743	0.000200064	0.000500875	0.00788593	0.0424267	0.0614403
Mon2	744	0.000202442	0.0005065	0.0429848	0.0553063	0.0481433
Hells	842	0.00020467	0.000511741	0.0246837	-0.00425172	-0.33471
Ccdc88a	844	0.000207647	0.000518847	0.0649526	0.0313657	-0.141413
Eif4e3	799	0.000219492	0.000548089	0.0312564	0.0153303	0.0440452
Ccni	745	0.000220308	0.000549771	-0.00152644	0.0985503	-0.021169
Son	746	0.000220953	0.000551024	-0.0170144	0.104333	0.140423
Ccdc6	748	0.00022382	0.000557816	0.0526054	0.0682296	0.0548153
Plekhg6	801	0.00022495	0.00056027	-0.00873644	0.0166686	0.0417833
Fancc	749	0.000225527	0.000561345	0.0382499	0.0433222	-0.00862293
D230017M19Rik	802	0.000231196	0.000575084	0.00409692	0.00379203	0.013965
Pik3c2a	750	0.000231641	0.000575819	0.0169446	0.0659353	0.0734331
Gse1	803	0.000235241	0.000584391	0.00446545	0.00670185	0.047692
Rfc2	851	0.00024511	0.000608516	0.0703398	-0.0186562	-0.503981
Cald1	852	0.000246105	0.000610595	0.141819	-0.011058	0.15416
Dusp16	753	0.000246799	0.000611923	0.022594	0.0531545	0.0474588
Ggt1	806	0.000251374	0.000622866	-0.016575	-0.0106032	0.0415659
Ulk1	807	0.000253673	0.000628159	0.0107219	0.0552402	0.0932998
Fam129b	754	0.000254174	0.000628995	-0.0130713	0.0869389	0.0811993
Btbd10	755	0.000257759	0.000637458	0.0079786	0.0446478	-0.0136831
Kansl3	757	0.000259475	0.00064129	-0.0355707	0.0583049	0.0597105
Brwd3	810	0.000265103	0.000654781	0.0256649	0.0297691	0.0488503
Iqsec1	813	0.000273438	0.000674934	-0.0831766	0.0066242	0.0712465
Eps8l2	814	0.00027384	0.000675496	0.00730557	-0.0157255	0.128726
Sdr16c5	861	0.000275063	0.00067808	0.023426	0.0157171	-0.020459
Krit1	760	0.000277922	0.000684688	0.0384058	0.0713029	0.033473
St6galnac4	863	0.000281868	0.000693966	0.132502	-0.37748	0.0959942
Ptp4a2	761	0.000284229	0.000699334	0.0720986	0.0878678	0.0627867
Aen	762	0.000290734	0.000714882	-0.00056357	0.0450275	-0.0446949
Nfib	817	0.000293062	0.000720149	0.0630849	-0.0652575	0.135331
Nfix	818	0.000294013	0.000722026	0.0906324	-0.0810169	0.161623
Ids	819	0.000294354	0.000722403	-0.00747897	-0.00955427	0.0412454
Osbpl5	820	0.000295157	0.000723914	0.00363949	-0.0105535	0.0376717
Nectin1	763	0.000295384	0.000724009	0.00654577	0.0320432	0.0363842
Arl5b	764	0.000295928	0.000724882	0.0218561	0.0445567	-0.0114609
Auts2	822	0.000296116	0.000724882	-0.0298334	-0.154265	0.229906
Amd1	777	0.000299494	0.000732687	0.00503228	0.0582612	0.0422509
Lama4	864	0.000301922	0.000738159	0.0616174	0.0340069	0.00930058
Spsb1	766	0.000302184	0.000738331	0.0275418	0.0296261	0.0319111
Slc28a3	865	0.000302705	0.000739136	0.079999	-0.029486	-0.0431052
Lockd	866	0.000305648	0.000745851	0.0383342	0.0190136	-0.542972
Car8	867	0.000309463	0.000754683	0.0975322	-0.103422	0.095605
Prss12	768	0.000311265	0.000758597	0.00339579	0.0200822	-0.13639
Unc119	868	0.000313381	0.000763273	0.0842282	-0.00934644	0.0736347
Rab4a	826	0.000327221	0.000796478	0.0765924	-0.250287	0.135827
Ten1	870	0.000333531	0.000811326	0.10171	-0.00714269	0.0874488
Clk1	812	0.000333966	0.000811873	-0.0689441	0.0835079	0.122686
Rflnb	828	0.000340361	0.000826898	-0.0589476	-0.00135526	0.0826183
Zfp266	872	0.000340843	0.000827546	0.0743358	0.0609495	0.0387027
Pum1	774	0.000343178	0.000832692	0.0488323	0.070698	0.074974
Ubap1	829	0.000344761	0.000836008	-0.00877858	0.0105814	0.0641355
Dnajb2	830	0.00034559	0.000837491	0.00291758	0.0689177	0.101143
Zdhhc21	873	0.000346287	0.000838653	0.0495757	0.0157473	-0.00866094
Ccar1	775	0.000347295	0.000840566	0.069863	0.0812428	-0.106464
Tmem35b	832	0.000354839	0.000858287	-0.0245267	-0.00627475	0.0549576
Irx5	778	0.000366248	0.000885329	0.0407017	0.0864024	0.0781836
Klf7	822	0.000385963	0.000932163	-0.0153417	0.0436968	0.0570175
Gpr146	835	0.000386106	0.000932163	0.0496524	-0.00689768	0.0677137
Trabd	874	0.000388811	0.000938108	0.10945	-0.183211	0.0556644
Clp1	780	0.000395494	0.000953636	0.0303813	0.0391972	0.0210913
Wfdc17	797	0.00039768	0.000958308	0.0460122	0.0586858	0.068334
Vgll4	836	0.000398154	0.00095885	-0.00745453	0.058841	0.0894128
Pabpn1	781	0.000400255	0.000963308	0.0228221	0.073969	-0.0336195
Lipa	838	0.000402176	0.00096733	0.0147513	-0.00751535	0.0521909
Yap1	824	0.000410278	0.000986201	0.0491279	0.0663391	0.0865554
S100b	875	0.000414861	0.000996596	0.0594153	-0.00792444	-0.043772
Hnrnph1	783	0.000417578	0.0010025	0.0582876	0.0702312	-0.166182
Ftl1-ps1	784	0.000423674	0.0010165	-0.00376421	0.0817683	0.0683842
Ctsf	842	0.000428491	0.00102742	-0.0368243	0.0123278	0.071915
Oasl2	843	0.000431777	0.00103466	0.0257918	0.0229492	0.0277629
Sparc	879	0.00043221	0.00103505	0.0546646	0.0449476	0.0462659
Flot1	845	0.000444143	0.00106297	0.0543802	0.0460628	0.134976
Ankrd33b	846	0.00044794	0.00107139	-0.000326202	0.0231526	0.0351796
Igfbp7	847	0.000454313	0.00108596	-0.019599	-0.00485988	0.0559775
C5ar2	849	0.000455967	0.00108924	-0.0152658	-0.203336	0.0966435
Lrrc8a	787	0.000456541	0.00108994	-0.0151293	0.0564271	0.0347584
Itpr1	850	0.000457048	0.00109047	0.0386586	-0.0681978	0.0898221
Chuk	788	0.000457808	0.00109161	0.0297638	0.0499602	0.0330747
Esyt3	851	0.00046178	0.0011004	-0.0122409	0.0323624	0.0515917
Nsmf	794	0.000462544	0.00110154	0.0626428	0.0597629	0.0814363
Ash1l	790	0.000476896	0.00113502	-0.0151563	0.080689	-0.00911742
Crybg2	854	0.000480958	0.00114398	0.013793	0.0120657	0.0324565
Uhrf1bp1l	792	0.00049479	0.00117615	0.00519824	0.0411233	0.0256728
Ifit1	859	0.000499127	0.00118573	0.00901484	0.0134156	0.0383352
Lpcat2	883	0.000501698	0.00119111	0.0614503	-0.0299104	-0.131324
Ppig	846	0.000507523	0.0012042	0.11616	0.0922412	-0.129894
Isoc2b	861	0.000508939	0.00120632	-0.00550047	0.0117036	0.0435102
Eif4ebp1	862	0.000509045	0.00120632	-0.0216127	0.023453	0.138413
Mansc1	863	0.000510792	0.00120972	0.0662974	-0.162853	0.121295
Smg5	795	0.000511558	0.00121079	0.035585	0.046039	0.0287183
Per2	798	0.000532356	0.00125925	0.00384146	0.0195063	0.0178223
Hspbap1	865	0.000540517	0.00127777	0.0110967	0.0185201	0.029676
Fnbp1l	885	0.000541664	0.00127969	0.0875742	-0.114459	-0.127165
Ddi2	866	0.00054399	0.0012844	0.0588704	0.0415078	0.112918
Vim	887	0.000545638	0.00128751	0.0557458	0.0185499	-0.435811
Lemd3	849	0.000569773	0.00134363	0.0057592	0.0231811	0.0280881
Fosb	800	0.000574059	0.00135291	-0.204142	0.0576815	0.0044361
Prag1	889	0.000577484	0.00136015	0.0346729	0.00586169	0.0329988
Ppp1r18	801	0.000587576	0.00138308	-0.000887623	0.0128018	-0.0113612
Ltbp3	859	0.000595103	0.00139994	0.0318459	0.0765195	0.118689
Oasl1	806	0.000606039	0.0014248	0.0136179	0.020266	0.0136807
Echdc2	891	0.000607736	0.00142792	0.102578	0.0085393	0.088547
Rbm5	873	0.000622825	0.00146248	-0.0185096	0.00126839	0.100035
Arhgap42	874	0.000625412	0.00146766	-0.0313178	-0.00082473	0.0332812
Cavin3	809	0.000640831	0.00150293	0.0198977	0.0216827	-0.0133204
Mkl1	862	0.000645899	0.0015139	0.0197704	0.0296924	0.0361182
Il20rb	893	0.000655298	0.001535	0.0719445	-0.375323	-0.146381
Smad7	811	0.000666425	0.00156011	0.0206201	0.0624819	0.0128796
Spast	813	0.000668319	0.0015636	0.0172277	0.0488423	0.0336762
Spry1	895	0.000672585	0.00157263	0.0527922	-0.121948	-0.148238
Ahcyl2	876	0.000673822	0.00157456	-0.0246375	0.0154054	0.056207
Mat2a	814	0.000679539	0.00158696	-0.0257746	0.0698489	-0.0562913
Trip6	897	0.000701609	0.00163751	0.0950624	-0.0110696	-0.0580256
Srpk2	815	0.000714425	0.00166642	0.071765	0.0844468	0.0745314
Cenpm	900	0.00072711	0.00169498	0.0203767	0.00111273	-0.560425
Stom	816	0.000729128	0.00169866	0.00969689	0.0190871	-0.00440559
Csrp2	902	0.000741042	0.00172537	0.0651255	-0.0194196	-0.191955
Fgd6	817	0.000742046	0.00172667	0.0293829	0.0380459	0.00764584
Wdr43	818	0.000749882	0.00174385	0.0322687	0.0667079	-0.0307191
Mgp	819	0.00075342	0.00175102	0.0686177	0.0920404	0.0230454
Samhd1	875	0.000762328	0.00177066	-0.100919	0.0570189	0.0839903
Rock1	905	0.000763494	0.0017723	0.0911398	0.0452278	0.0224875
Prkx	820	0.000781295	0.00181218	0.00157871	0.0299606	0.0124135
Dpyd	884	0.000781614	0.00181218	-0.0307973	0.00186606	0.051014
Arg2	886	0.000788505	0.00182706	-0.00612466	-0.021297	0.0521536
Cnn2	821	0.000793472	0.00183746	0.0161173	0.0421918	0.0459827
Irf7	890	0.000801168	0.00185417	0.0203465	0.000242794	0.0962492
Itgb3bp	910	0.000815121	0.00188533	0.0535769	-0.00256691	-0.171364
Lmcd1	823	0.000817635	0.00189001	0.0244635	0.0395689	-0.00221525
Rhbdf1	825	0.000825716	0.00190755	0.0322088	0.0512352	0.0226092
Dapk1	892	0.000833798	0.00192507	-0.00585289	-0.0257848	0.0700798
Sec14l1	911	0.000834669	0.00192593	0.0923338	-0.0514659	0.0101651
C130032M10Rik	894	0.000846314	0.00195163	0.00867465	0.00226219	0.0197848
Pfkfb3	896	0.000853456	0.00196693	-0.000346177	0.0133826	0.0192186
Tmem52	897	0.000863788	0.00198955	-0.0072473	0.000983778	0.0108303
Mcm3	912	0.000870596	0.00200403	0.0263189	-0.00528991	-0.304194
Rictor	830	0.000874106	0.00201091	0.00272281	0.0505006	0.0355378
Zfp131	831	0.000878773	0.00202044	0.000658318	0.0444443	0.000455956
Aif1l	913	0.000888044	0.00204054	0.0357253	0.0144386	-0.131781
Egln3	899	0.000912939	0.0020965	0.0222475	-0.201195	0.15998
Csnk1g1	833	0.000921599	0.00211513	0.028495	0.0377029	0.0310034
Eppk1	834	0.000923367	0.00211792	-0.00202021	0.0292595	-0.0309417
Il10rb	902	0.000926902	0.00212477	-0.0174741	-0.0475837	0.0845242
Gm16062	836	0.000929064	0.00212846	0.0345309	0.044707	0.00234628
Sema4c	837	0.00093457	0.0021398	0.0215427	0.034114	0.0231292
Akirin1	838	0.000959661	0.00219595	0.0351823	0.0463714	0.0360717
Arhgef12	839	0.000964045	0.00220401	-0.00135367	0.0706111	0.0747482
Slc16a1	840	0.000964328	0.00220401	0.0038884	0.0167957	-0.00842487
Nup98	842	0.000975556	0.00222836	-0.018326	0.0545528	0.0530601
Chrm3	919	0.000987169	0.00225355	0.0820582	-0.0627251	0.0767009
Mroh1	898	0.000999548	0.00228046	-0.0120926	0.0329232	0.0467598
Kmt2a	848	0.00101797	0.00232111	-0.0064857	0.0564476	0.0386119
U2af1	920	0.00102908	0.00234505	0.105605	0.0592962	-0.232591
Acot1	921	0.00103722	0.00236222	0.088973	-0.0890306	0.0762656
Nudt7	907	0.00103792	0.00236241	0.0181211	-0.0697728	0.0471463
Bnip3l	850	0.00104754	0.0023829	-0.0349051	0.0940533	0.0466838
Pafah1b1	852	0.00108625	0.0024695	0.0627881	0.0922519	0.0195292
Peak1	855	0.00112586	0.00255805	0.0148936	0.0340942	0.036348
Cx3cl1	856	0.00112743	0.00256011	-0.0537361	0.0391648	0.0202503
Hdac11	913	0.0011505	0.00261096	-0.140813	-0.0892549	0.0862742
Erich2	914	0.00115491	0.00261942	0.00586047	0.00895868	0.0237035
Lurap1	925	0.00115603	0.00262043	0.0612056	-0.102787	0.00470137
Fdft1	857	0.00116054	0.00262825	0.0411759	0.0555168	-0.0422974
Traf1	915	0.00116084	0.00262825	-0.125101	-0.0738972	0.0464553
Coq8a	918	0.0012207	0.00276214	-0.0479473	-0.046418	0.0478622
Crip1	910	0.00128636	0.00290901	0.0626303	0.0567465	-0.780323
Far1	863	0.00128825	0.00291157	0.0414504	0.0603347	0.0572417
1200007C13Rik	864	0.00129595	0.00292727	-0.0111953	0.0351025	0.0229526
Spc25	928	0.00131907	0.00297775	0.0217246	0.00989213	-0.490011
Hif1a	867	0.00132401	0.00298716	0.0137227	0.072932	-0.0723564
Ccdc17	920	0.00133456	0.00300919	0.00333402	-0.00233514	0.0183863
Irf1	921	0.00134619	0.00303365	0.00363042	0.030138	0.0798652
Pgp	922	0.00135164	0.00304416	0.0101881	-0.813928	0.196398
Sac3d1	929	0.00135909	0.00305913	0.0655507	-0.0106372	-0.061886
Eif3c	930	0.00136325	0.00306672	0.107994	0.0769015	-0.10958
Zdhhc18	869	0.00139078	0.00312683	0.0198076	0.0418796	0.0212129
Vps13a	924	0.00139902	0.00314351	0.0651925	0.0366562	0.0904421
Fam135a	870	0.00140178	0.00314788	0.00496664	0.0205511	-0.020078
Dbp	925	0.00140887	0.00316197	-0.258593	-0.150598	0.11002
Gbp3	932	0.0014165	0.00317724	0.0394072	0.0279787	0.0273535
Tapbpl	934	0.00142393	0.00319206	0.0586882	0.00373704	0.0364171
Gm42418	927	0.00143141	0.00320696	-0.151252	-0.0313755	0.222654
Map7	871	0.00145596	0.00326007	0.0323606	0.063027	0.0764915
4931406P16Rik	872	0.00146891	0.00328716	0.0296301	0.0585529	0.0430871
Higd1a	873	0.00147416	0.00329508	-0.143433	0.0931776	-0.36568
Ogfr	936	0.00147394	0.00329508	0.0815292	0.0378566	-0.0393198
Tnfaip2	930	0.00149156	0.00333205	-0.0153841	0.00940168	0.018439
Vezf1	874	0.00151458	0.00338152	-0.00548668	0.0601727	0.0573192
Ppp1r15b	931	0.00152564	0.00340422	-0.0083678	-0.0128879	0.0740463
Sf1	876	0.00152815	0.00340786	0.00306945	0.0616597	-0.0250944
S100a14	877	0.0015305	0.00341113	0.0168905	0.0197189	-0.00605896
Zfyve1	878	0.00154473	0.00344086	0.0118946	0.0247189	0.0244694
Taf7	879	0.00156308	0.00347973	0.0336228	0.0574701	-0.0161681
Mdm2	880	0.00157821	0.00351137	0.00703069	0.0430265	0.00135402
Pnisr	935	0.00158172	0.00351716	-0.10959	-0.07229	0.126146
Hipk3	883	0.00162945	0.0036212	0.0211028	0.0483572	-0.0176137
E2f1	942	0.0016359	0.00363346	0.0154103	-0.00519966	-0.285945
Chd4	884	0.00163988	0.00364018	0.0439401	0.081302	-0.0508048
Arih2	885	0.00165015	0.00366089	-0.0155376	0.042543	0.0241284
Pja2	939	0.00165843	0.00367714	-0.00188804	-0.00102448	0.0811978
Stac2	940	0.0016647	0.00368892	-0.0568222	0.00698014	0.149622
Scnn1b	941	0.00172303	0.00381598	0.00652279	-0.0223443	0.0514537
C2cd5	947	0.00173226	0.00383422	0.0606711	-0.0816339	0.0443573
Scaf11	887	0.00175625	0.0038851	0.0636499	0.0836038	-0.0967518
Nucks1	948	0.00177385	0.00392178	0.0942303	-0.0584203	-0.806794
Tigd2	949	0.00178154	0.00393654	0.07128	0.045943	-0.0299231
Sertad2	889	0.00179115	0.0039555	0.0312151	0.0747234	-0.0257061
Helz2	945	0.00180236	0.00397798	0.00877684	0.0218102	0.0229452
Parm1	945	0.00180584	0.00398339	-0.0590923	-0.0124789	0.0794952
Pkn2	891	0.00181833	0.00400863	-0.00511369	0.0765496	-0.0870338
Tuft1	947	0.00181972	0.0040094	-0.00594672	0.00622011	0.0472095
Junos	948	0.00184108	0.00405416	-0.0056151	-0.000298103	0.0125438
Sgk1	950	0.00185831	0.00408978	0.0166516	0.0512502	0.127042
Ppfibp1	892	0.00188049	0.00413621	0.00446255	0.0378969	-0.00175144
Dlgap1	952	0.00188431	0.00414226	0.0151875	0.00408067	-0.108586
Magix	952	0.00192087	0.00422022	-0.0487273	-0.0256767	0.0209599
D930016D06Rik	893	0.00192443	0.00422467	0.00931934	0.0228849	-0.004461
Leo1	953	0.00192508	0.00422467	0.0632147	0.0484263	-0.0253032
Ssh3	955	0.00197037	0.00432097	-0.00273112	0.00803769	0.0422748
Gm20219	956	0.0019712	0.00432097	0.00970868	0.00109385	0.0498247
Atxn7	896	0.00198061	0.00433911	0.0238023	0.0457468	0.0197613
Pttg1ip	957	0.00198796	0.00435276	-0.0469391	-0.0132046	0.0923956
Ppl	959	0.00201623	0.00441215	-0.000974186	0.0320114	0.035367
Enpp1	899	0.00202946	0.00443857	0.0161672	0.0442243	-0.00332887
Dmkn	900	0.00203073	0.00443885	-0.019222	0.0234428	0.0029975
Rasa2	901	0.00203925	0.00445495	-0.00821023	0.0293074	0.019661
Gm47533	959	0.00207535	0.00453123	0.00432316	0.0190801	0.0177853
Tspan4	903	0.00212697	0.00464132	-0.0626512	0.0545007	0.0596206
Steap4	904	0.00213585	0.00465699	-0.00132053	0.018582	0.00470143
Zfp521	962	0.00213746	0.00465699	-0.0149597	-0.00521111	0.0136404
Ttc28	963	0.00213777	0.00465699	-0.0512382	-0.0141509	0.0212293
Hist1h2be	964	0.00215606	0.00469417	0.0178609	-0.00910497	0.0499387
Ern1	950	0.00217783	0.0047389	0.00235465	0.019097	0.0243787
Ankhd1	968	0.00219585	0.00477541	0.00761067	0.0287129	0.0767966
Mcee	969	0.00219929	0.0047802	-0.0614336	-0.163174	0.112665
Sdc1	906	0.00223208	0.00484874	0.0501247	0.0505725	-0.141959
2610528A11Rik	970	0.00223424	0.0048507	-0.22997	-0.00131858	0.0605908
Hook3	971	0.00223803	0.00485619	0.0415275	0.00258325	0.0741681
Sema5a	963	0.00228841	0.00496273	0.0223865	0.0209648	-0.0235857
Chpt1	907	0.00230933	0.00500527	-0.076195	0.0727439	0.0843777
Ggt6	976	0.00232456	0.00503545	-0.014692	-0.0133444	0.0203795
Ppil6	978	0.00234186	0.00507009	-0.00618223	-0.00427567	0.0113476
Pitpnc1	980	0.0024294	0.00525667	0.0617094	0.0180374	0.113313
Smc6	962	0.00244103	0.00527886	0.0798874	-0.100907	-0.291902
Amigo2	971	0.00244323	0.00528066	0.0160802	0.0153276	0.0153432
Lgmn	911	0.00245112	0.00529475	0.0107605	0.0509817	0.0400578
Klhdc1	982	0.00245425	0.00529853	-0.0709044	-0.0349356	0.0730086
Gtpbp2	912	0.0024697	0.00532892	0.036332	0.0579836	0.0817151
Birc5	964	0.00252192	0.00543855	0.0242273	0.00664436	-0.979974
D10Wsu102e	915	0.00255295	0.00550238	0.0395464	0.0515052	-0.00384897
Il18bp	985	0.00255843	0.00551113	0.0297993	0.0135847	0.0489398
Itgb6	975	0.00256781	0.00552824	-0.00342192	0.0248537	0.0358614
Rest	916	0.00258092	0.00555337	0.0405908	0.0675222	0.0439979
Rexo2	987	0.00259185	0.00557378	-0.023458	-0.132651	0.133103
Serpinb6b	988	0.00260227	0.00559308	0.00880642	0.00187231	0.0155447
Rai14	918	0.00262213	0.00563262	0.0143456	0.0304028	0.0226748
BC017643	989	0.00262837	0.00564288	0.0183158	0.0231457	0.0474109
Nisch	919	0.00264247	0.00566741	-0.0127292	0.0780446	-0.0184929
Hs6st1	990	0.00264273	0.00566741	0.0367992	0.0221998	0.0575664
Nhs	991	0.00264671	0.00567278	-0.00214764	0.00448547	0.0175472
Fbxl7	967	0.00267932	0.00573948	0.0332589	0.0109528	-0.00694487
Tmem140	992	0.00269337	0.00576639	-0.00359	-0.0179405	0.0318789
Lst1	994	0.00275685	0.00589901	-1.53309e-05	-0.000192206	0.0176614
Limd1	969	0.00278964	0.00596586	0.0619517	-0.0484049	0.0506928
Xpr1	985	0.0028204	0.00602832	0.039027	0.0415919	0.0611867
Furin	995	0.00283413	0.00605431	0.0360932	-0.0149906	0.0759528
Rnf2	921	0.0028492	0.00608313	-0.0028678	0.034662	0.0250048
Atp6v1g2	997	0.00285595	0.00609417	-0.00457454	-0.00518284	0.0204344
Mr1	998	0.00290401	0.00619329	0.00629165	-0.021059	0.067231
Trps1	1001	0.00291967	0.00622324	-0.0482193	-0.00140798	0.173749
Nfatc2	925	0.00294459	0.00627291	0.013523	0.0291043	0.0155632
St6galnac6	1003	0.00295416	0.00628983	0.0575173	-0.103813	0.139187
Hdac5	926	0.00299758	0.00637875	0.00972426	0.0451692	0.0349177
Luc7l3	927	0.00301231	0.00640656	0.0141247	0.0773883	-0.190471
Gna15	1007	0.00304562	0.00647384	-0.00510752	-0.0176647	0.029065
Mllt6	929	0.00306973	0.00652149	-0.0391912	0.0358972	0.0104895
Nr4a3	930	0.00308241	0.00654483	0.00351795	0.0133318	-0.00279871
Sybu	1009	0.00309533	0.00656864	-0.00431196	0.00329824	0.0101765
Dedd2	932	0.00314025	0.0066603	0.0326699	0.0421042	0.0206866
Vipr1	1011	0.00317058	0.00672093	-0.020219	-0.0477359	0.0660635
Cept1	1012	0.0031747	0.00672598	0.0186577	-0.00580332	0.0965049
Dek	934	0.00321524	0.00680811	0.0452148	0.0787753	-0.744332
Cyba	935	0.00322809	0.00683158	-0.0191636	0.0468146	-0.311073
Rassf9	1014	0.00324027	0.0068536	-0.0125005	-0.0408708	0.0295376
Epb41l5	936	0.00324547	0.00686083	0.0130797	0.0319365	0.0270908
Pfkp	938	0.00327862	0.00692712	-0.132715	0.0747671	-0.126876
Klf3	998	0.00332287	0.00701583	0.0479439	0.0723871	0.0899948
Col4a6	1017	0.00332425	0.00701583	0.00653047	0.0243548	0.0392665
Cpsf4l	1018	0.00334643	0.00705879	-0.00683515	-0.0150008	0.0321467
Nipal3	1019	0.0033744	0.0071139	0.00291826	-0.0331083	0.0482784
Ccnt2	940	0.00338075	0.00712082	-0.00950796	0.0541744	0.064363
Col9a3	941	0.00338137	0.00712082	0.0557065	0.0588621	-0.287248
A530010L16Rik	1020	0.00339404	0.0071436	-0.0258368	-0.0238327	0.0261469
Thnsl2	1021	0.0034099	0.00717306	0.0262148	-0.003625	0.0578485
Eprs	982	0.0034157	0.00718135	0.0878022	0.0366218	-0.157214
Arl10	1023	0.00349696	0.00734818	0.00474768	0.00643486	0.0173252
Mia2	984	0.0035046	0.00736024	0.080565	0.00318028	-0.0159036
Lgr6	985	0.00351752	0.00738336	0.0305185	0.018176	0.00464441
Hint1	986	0.00355866	0.00746564	0.0890096	0.0322418	-1.26786
Pea15a	943	0.00358083	0.00750807	0.0737394	0.0764586	-0.0686982
Clec2d	1026	0.00363592	0.00761945	-0.0335933	0.0177726	0.0415683
Fgg	947	0.00364094	0.00762581	0.00898369	0.0147922	0.00964142
Clcn3	1027	0.00367327	0.00768849	-0.0540087	-0.0417335	0.122243
Klhdc7a	1028	0.00367485	0.00768849	-0.0625737	-0.189492	0.0462625
Akap9	1029	0.00379143	0.0079281	0.0461457	0.0314829	0.116572
Nfe2l3	986	0.00379829	0.00793813	0.00756404	0.0167174	0.0211956
Taf15	951	0.00384742	0.00803647	0.0207091	0.0531789	-0.0447775
Scgb1c1	1030	0.00389949	0.00814082	0.0111445	0.00188562	0.0163102
Nsmaf	1031	0.00392449	0.00818857	-0.0110183	-0.00951159	0.0226434
Nrtn	1032	0.00397306	0.00828545	-0.00399216	-0.02045	0.113702
Ppil4	954	0.00398041	0.00829628	0.0139003	0.0559582	0.0177036
Ccnt1	955	0.00398719	0.00830146	-0.0315929	0.0515249	-0.0174456
Cyth1	992	0.00398598	0.00830146	0.0453789	-0.0197513	0.0200494
Klhdc2	993	0.00399277	0.00830858	0.0932985	-0.116744	-0.0995688
Smc1a	957	0.00400611	0.00833184	0.0436998	0.0684758	-0.146793
Gmeb1	963	0.00406799	0.00845599	-0.010021	0.0269376	0.00223375
Slc9a3r2	995	0.00407372	0.00846334	0.0767027	-0.10857	0.0492776
Plcxd2	1033	0.00412255	0.00856017	0.00346417	-0.0219358	0.0143748
Vwa5a	1018	0.00412773	0.00856633	-0.00299445	0.0428246	0.0659603
Pnp	996	0.00414278	0.00859293	0.0549117	0.0212073	0.027804
Naga	1035	0.00415958	0.00862314	0.0122117	-0.0122825	0.0782421
5830454E08Rik	1038	0.00421993	0.00874355	-0.0136736	-0.0112504	0.0182997
Hist1h2bc	1040	0.00429425	0.00889276	-0.0464235	-0.282609	0.214157
Kmt5a	1003	0.00435872	0.00902143	0.0858876	0.0159959	-0.0322048
Tmem218	1005	0.00441783	0.00913888	0.0686484	-0.0389601	0.022284
Gm47283	1006	0.00443255	0.0091644	0.0631538	0.0488206	-0.134384
Hpcal1	1080	0.00443804	0.00917084	0.0533389	-0.113391	0.0738019
Sec24a	1007	0.00446458	0.00922074	0.0434545	0.0352305	0.015206
Mccc1	1047	0.00454658	0.00938508	-0.015848	-0.00515	0.0503596
Mfsd4b4	1008	0.00457046	0.00942932	0.029268	0.00654536	0.0173643
Cdca3	1009	0.00458687	0.00945811	0.0191356	-0.00468583	-0.655125
Tor3a	1050	0.0046721	0.00962872	0.0155804	-0.0206276	0.0333352
Fbrsl1	968	0.00473346	0.00974997	0.0187881	0.0379641	0.0396595
Tmem82	1011	0.00478057	0.00984175	0.0288176	-0.0500471	-0.0440358
Khdrbs3	969	0.004787	0.00984974	0.0262555	0.0405875	0.0357442
Hist1h3d	1054	0.00484378	0.00996126	0.00411726	-0.00726817	0.0141774
H2-T22	1017	0.00492618	0.0101253	0.0708149	-0.0407755	0.0204651
Cadm1	973	0.00502356	0.01032	0.0192327	0.0341793	-0.01581
Golt1b	1022	0.00505958	0.0103831	0.0451591	0.0261517	-0.0774444
Phf21a	1058	0.00505966	0.0103831	-0.00590088	-0.00582909	0.0484003
Trim30a	976	0.00514534	0.0105533	0.0158847	0.01985	0.013992
Dnajc2	977	0.00516356	0.010585	0.0182792	0.0503383	-0.0937481
Megf8	978	0.00518416	0.0106216	0.0231596	0.0294818	0.00369042
Ccl2	979	0.00521569	0.0106805	0.0258879	0.0277219	0.0207995
AI463170	1062	0.00532763	0.010904	0.00501565	-0.00649866	0.0566758
Ncoa1	1063	0.00535047	0.0109449	0.0193493	0.0369091	0.0599343
Ccdc34	1029	0.00546344	0.0111701	0.0646041	-0.0475926	-1.06079
Ilf2	1030	0.00554558	0.011332	0.0748793	0.0066141	-0.270216
Tmpo	984	0.00563319	0.011505	-0.0737831	0.0407124	-0.44117
Nfasc	1066	0.00565301	0.0115393	-0.0138237	0.0074014	0.0190413
Ppp1r37	1067	0.00566786	0.0115635	0.00243741	-0.0173661	0.0899301
Prc1	987	0.005772	0.0117696	0.00427916	0.0141403	-0.415454
Cbl	1068	0.00577495	0.0117696	0.00811536	0.0223553	0.0466199
Tcf19	1033	0.00579031	0.0117946	0.0180544	-4.7292e-05	-0.409815
Osbpl3	988	0.00579847	0.011805	-0.00133624	0.0227573	0.0190082
Rb1	989	0.00584112	0.0118856	-0.00883759	0.0370385	0.0209282
Ap5z1	1070	0.00584766	0.0118926	0.00811831	0.00217778	0.0259863
Arhgap8	1034	0.00586476	0.0119211	0.0609771	-0.123158	0.0606263
Fam111a	1036	0.00587115	0.0119278	0.0100074	-6.09029e-05	-0.283037
Agtrap	1071	0.00596363	0.0121093	-0.0111308	-0.0292387	0.0490322
Vsir	1072	0.00598338	0.012143	-0.0553911	-0.0199753	0.0239067
Pcdhb5	1073	0.00606065	0.0122934	0.00240064	0.00419064	0.0170396
Cdk11b	992	0.00612768	0.0124228	-0.00487877	0.0532639	0.00683234
Cenpf	1041	0.00615277	0.0124671	0.0156128	0.00771554	-0.632677
Ppic	993	0.00618598	0.0125278	-0.00399785	0.0162475	-0.214072
Swt1	1077	0.00622773	0.0126058	0.0180835	0.0345846	0.076599
Snai1	994	0.00628415	0.0127133	0.0154771	0.0351116	0.0216223
Pmf1	1044	0.00631432	0.0127676	0.0449063	-0.0158512	-0.599022
Tacstd2	1079	0.00635213	0.0128374	0.0160031	0.0111223	0.0266349
A830035O19Rik	1114	0.00636515	0.0128569	0.0136897	0.00226	0.0177367
Ube4b	1080	0.00638305	0.0128863	0.00544081	0.0167619	0.0615277
Myc	995	0.00639759	0.012909	0.0122561	0.0487082	0.0720461
Zmiz1	1081	0.00644823	0.0130043	-0.0240337	-0.0759802	0.0805447
Ncald	1082	0.00651563	0.0131334	-0.343068	-0.525291	0.140853
Mmgt2	1083	0.00652752	0.0131505	-0.00754165	-0.0625736	0.0625137
Nos1ap	1084	0.0065345	0.0131577	-0.0641543	0.0247442	0.0631552
Dcaf12	1086	0.00661366	0.0133101	0.00845987	0.0370055	0.0564214
Ace	1087	0.00662508	0.0133262	-0.00985993	0.011215	0.0427204
Klf10	999	0.00672012	0.0135103	0.0264962	0.0536069	0.0259019
Hif1an	1000	0.0067282	0.0135195	0.0169862	0.032708	0.0364721
Rnf111	1089	0.00675555	0.0135674	-0.0104637	0.0279237	0.0526228
Siah2	1001	0.00678408	0.0136176	0.0205171	0.0514318	0.0474536
Vsig10	1002	0.00684137	0.0137254	0.00137058	0.0318886	-0.0312122
Ubtd2	1003	0.00694664	0.0139294	0.00470622	0.0231178	0.0135705
Zdhhc20	1006	0.00710504	0.0142396	0.0363389	0.0467296	0.0639371
Meltf	1051	0.0071198	0.0142618	0.0331809	0.00298933	-0.00432424
Kmt2c	1097	0.00714502	0.0143014	0.00770544	0.0336009	0.059088
Nfkbie	1098	0.00714698	0.0143014	0.00152267	0.018921	0.0190216
N4bp2l1	1007	0.00724753	0.014495	0.00956991	0.0286025	0.0183009
Ube2c	1053	0.00725502	0.014495	0.0194666	-0.00115578	-0.797603
Sertad3	1099	0.00725202	0.014495	0.0181593	0.00292576	0.0349323
Glt28d2	1054	0.00733881	0.0146548	0.054076	0.0167091	0.0661348
Osgin1	1101	0.00739547	0.0147603	0.00324155	0.0204342	0.0564542
Lrrc42	1056	0.00740174	0.0147652	0.0394518	0.0272575	0.0242598
Prr13	1009	0.00747109	0.0148918	-0.0733987	0.0825475	0.0833543
Pclaf	1060	0.00747294	0.0148918	0.0218989	0.00694667	-1.0781
Tmem14a	1061	0.00753469	0.0150071	0.0437039	-0.0221202	0.00938258
2810403A07Rik	1011	0.00762469	0.0151739	-0.00611236	0.039319	-0.0057907
Ascc3	1031	0.00762626	0.0151739	0.0412224	0.0419367	0.0577203
Atxn7l3b	1063	0.00768304	0.015279	0.0848035	0.0400695	0.104704
Saa2	1013	0.00785283	0.0156086	0.0303177	0.0395373	0.0223018
Sp3os	1067	0.00785905	0.0156129	0.0575917	0.0230888	-0.0232522
Ptms	1014	0.00786728	0.0156212	-0.0375779	0.0802778	-0.250205
Ophn1	1108	0.00789367	0.0156655	-0.0174757	-0.0196815	0.0542795
Tmem57	1069	0.00803384	0.0159355	0.0636824	0.0308292	0.0267768
Pcdhb14	1110	0.00806929	0.0159976	0.0067418	-0.0108611	0.0183369
Phf23	1017	0.00819275	0.016234	-0.0219406	0.0456681	0.0458594
Mtm1	1112	0.00838451	0.0166055	0.0165268	0.0219368	0.0411634
Erbb2	1113	0.00843385	0.0166946	0.00587884	-0.0240135	0.0630776
Cacybp	1074	0.00856354	0.0169426	0.0771165	-0.0278945	-0.324393
Acadm	1119	0.00857156	0.0169498	-0.0716746	-0.0467226	0.0953548
Lgals7	1075	0.00864965	0.0170955	0.0378308	0.0221726	0.0130282
Gm7694	1120	0.00868086	0.0171484	-0.00232302	0.00597976	0.0245477
C1rb	1121	0.00877864	0.0173327	0.00199368	0.00415967	0.0100821
Stmn1	1079	0.00886626	0.0174967	0.0658334	0.0218372	-1.33691
Gtf3c2	1021	0.00889996	0.0175542	0.0383675	0.0433084	-0.0341553
Kitl	1124	0.00892138	0.0175875	-0.00427925	-0.0305315	0.0623967
Mif4gd	1125	0.00903446	0.0178013	0.00111892	0.0101929	0.0798743
Gm35696	1083	0.00911843	0.0179576	0.0416457	-0.0168049	0.0199236
Cks2	1084	0.00918435	0.0180782	0.0500028	0.0347531	-0.831586
Etv1	1086	0.00928652	0.01827	0.0923658	-0.213421	-0.0495616
Isg15	1129	0.0093354	0.0183568	0.0482684	0.0507977	0.0551565
Srp54a	1130	0.00942435	0.0185222	0.0172188	0.00523947	0.0509472
Gm10642	1131	0.00950165	0.0186646	0.00409851	-0.0113813	0.0189121
Arl4d	1132	0.00955266	0.0187553	-0.0342463	0.00211501	0.00938324
Stat1	1089	0.00956693	0.0187738	0.0312967	0.00910474	0.00666866
Atp2a2	1025	0.00958283	0.0187954	0.0485669	0.0603733	0.00896096
Slc48a1	1133	0.00963205	0.0188823	0.0131352	0.000101298	0.0946933
Tmem106a	1134	0.00975409	0.0191119	0.0158432	0.0127705	0.01946
Uggt1	1092	0.00980017	0.0191924	0.045044	0.0233832	-0.0210679
AI463229	1093	0.0098386	0.0192579	0.0449203	-0.0144692	-0.0145339
Prpf4b	1029	0.00990976	0.019382	-0.0362941	0.0693237	-0.143521
Zfp651	1136	0.00991272	0.019382	-0.0199031	-0.0200699	0.0136365
Lyn	1137	0.00991706	0.019382	0.0114151	-0.000983388	0.0398362
Mfsd13a	1032	0.00997672	0.0194887	0.0362584	0.0441179	0.0418418
Tor1aip1	1138	0.010046	0.0196141	-0.00948383	0.0432859	0.0702325
Noxo1	1096	0.0101084	0.01972	0.0585888	-0.034826	0.034867
Abcg1	1139	0.0101104	0.01972	-0.0194296	0.00298552	0.0187485
Lrrc75b	1140	0.0101621	0.0198108	-0.000467606	-0.0296817	0.0281836
Htra3	1033	0.010244	0.0199602	5.27253e-06	0.0190912	0.0180388
Lif	1034	0.0102981	0.0200546	0.00199681	0.0168736	-0.00816818
Tle2	1141	0.0103028	0.0200546	0.00344685	-0.00787604	0.0545383
Bend7	1036	0.0103445	0.0201255	-0.00296404	0.0189765	0.0122364
Ppp2r2d	1037	0.0104004	0.0202243	0.0196907	0.043718	9.62884e-05
Avl9	1038	0.0104065	0.0202259	0.00653125	0.0359958	0.0427799
Idh2	1097	0.0104757	0.02035	0.0722779	0.0187567	-0.310895
Aktip	1146	0.0108559	0.0210781	0.0242415	-0.00263245	0.0708291
Rusc2	1040	0.0110505	0.0214451	-0.00971003	0.010786	0.00682131
Dhx9	1101	0.0111012	0.0215326	0.0458431	0.042642	-0.11247
Lmbrd1	1150	0.0111539	0.021624	-0.00883824	-0.0209683	0.0631552
Armcx6	1102	0.0111809	0.0216655	0.0214355	0.0201813	0.0163086
Nckipsd	1151	0.0112181	0.0217266	-0.00126145	0.000383207	0.00859036
Zc3h15	1101	0.0113076	0.0218889	0.0822708	0.0608764	-0.260773
Rnd3	1041	0.0113671	0.0219931	0.0017385	0.0230765	-0.0179175
Gm26632	1042	0.0114617	0.0221651	0.00815422	0.0203692	0.0165733
Oxa1l	1154	0.0115061	0.0222398	0.052837	-0.0652355	0.0966382
Nfat5	1043	0.0115331	0.0222808	-0.00341386	0.0444341	0.0492655
Lysmd2	1104	0.0115565	0.0223147	0.0359433	0.00206327	-0.0784466
Eif2b4	1105	0.0116528	0.0224896	0.0626437	0.0257697	-0.00167167
[truncated: 1,859 more rows]

## Sheet: 3- AvD
	Top	p.value	FDR	logFC.1	logFC.2	logFC.4
Aldoc	1	3.43273e-193	1.32435e-189	1.62834	0.191084	1.42621
Col9a1	2	5.13845e-183	9.91208e-180	1.32877	-0.0928928	0.345825
Cited4	1	4.03811e-157	5.19301e-154	0.944408	1.10847	0.938599
Fkbp11	3	1.06942e-152	1.03146e-149	1.20987	-0.0151112	0.420931
Duoxa1	4	7.41624e-147	5.72237e-144	1.24164	0.30812	1.1935
Cd36	5	1.6266e-146	1.04591e-143	1.07442	0.0474597	0.692259
Npnt	6	9.9458e-142	5.48156e-139	1.00071	0.175649	0.388114
Aqp5	2	2.37804e-138	1.14681e-135	1.27262	0.884639	1.44971
Zfp106	7	2.68838e-136	1.15242e-133	1.0491	0.20747	0.794083
Sec61b	8	8.0476e-131	3.10477e-128	0.924115	-0.0260749	0.417143
Calr	10	1.96834e-126	6.9035e-124	1.0447	-0.058697	0.396799
Lmo4	4	5.52054e-126	1.77485e-123	1.00907	0.842298	0.429713
Shf	12	3.40594e-122	1.01078e-119	1.05148	0.515571	0.387169
Pgp	3	1.5779e-121	4.34825e-119	0.836179	0.813928	1.0182
Ccnd1	13	2.25247e-118	5.79335e-116	0.784785	0.103898	-0.238849
Cmas	14	4.9276e-118	1.18817e-115	0.863398	0.22722	0.268871
Slc29a1	15	3.126e-115	7.09418e-113	1.07787	0.23092	0.40654
Fblim1	16	4.42855e-113	9.49185e-111	0.879916	0.273209	0.222111
Nme1	17	3.37312e-108	6.8492e-106	0.825381	-0.0792803	-0.334458
Slc25a5	18	1.74573e-106	3.36751e-104	0.829678	-0.0347696	-0.183773
Lalba	19	6.24901e-106	1.14803e-103	1.58573	0.477169	1.08778
Serp1	20	5.26414e-104	9.23139e-102	0.809238	0.148182	0.256671
Id2	5	6.59146e-104	1.10565e-101	0.416	0.913255	0.64196
Igfals	3	8.36701e-103	1.345e-100	0.75275	0.172665	0.778257
Pdia6	22	1.3557e-102	2.09212e-100	0.835937	-0.0645036	0.229217
Trim46	23	2.24531e-100	3.33169e-98	0.712509	0.279077	0.222815
Manf	24	9.61798e-100	1.3743e-97	0.923934	-0.0722109	0.0469504
Folr1	25	1.81916e-99	2.50654e-97	0.896251	0.049355	0.387002
Emid1	26	2.0374e-99	2.71045e-97	0.974361	-0.0239123	0.522126
Wfdc18	27	4.31852e-99	5.55361e-97	1.48709	-0.256322	0.487198
Tmem216	28	1.60902e-97	2.00245e-95	0.660097	0.194178	0.00297849
Nf1	22	3.15909e-96	3.80868e-94	1.0183	0.318444	1.02698
Ostc	30	5.14011e-94	6.00925e-92	0.670399	0.0508196	0.0600707
Fos	6	5.64053e-94	6.40035e-92	0.0697308	1.14833	0.608506
G0s2	7	8.6835e-94	9.57169e-92	0.537427	0.75811	0.471622
Rogdi	32	4.68419e-93	5.01989e-91	0.625567	0.0858733	0.226258
Tmem37	33	5.10424e-91	5.32221e-89	0.694613	0.247421	-0.157126
Srm	34	1.04536e-89	1.06132e-87	0.587532	0.0807631	0.130002
1110008P14Rik	35	1.27688e-89	1.26313e-87	0.75239	-0.152432	-0.159962
Taldo1	36	1.93809e-89	1.86929e-87	0.707782	0.0395359	0.270937
Spag5	37	1.34011e-88	1.26101e-86	0.519472	0.216291	0.276611
Nans	38	6.09365e-88	5.59746e-86	0.651829	0.101818	0.171335
Csn1s2a	39	1.20666e-86	1.08262e-84	1.90313	-0.123546	0.535238
Abcg2	40	7.12592e-85	6.24814e-83	0.548772	-0.0498977	-0.205106
Ppib	41	5.97572e-84	5.12318e-82	0.710637	0.0300691	0.316658
Deptor	43	2.1707e-83	1.82056e-81	0.704234	0.193816	0.569187
Acsl4	44	1.44606e-81	1.187e-79	0.738042	0.0731828	0.365778
Lman1	45	5.56464e-81	4.47258e-79	0.664663	0.117515	0.338044
Mydgf	46	1.55919e-80	1.22763e-78	0.654486	0.0451561	0.320515
Sec11c	47	3.19e-77	2.46141e-75	0.672614	0.111557	0.407069
Alkal2	48	2.60914e-75	1.97373e-73	0.770409	0.287435	0.479443
Thrsp	13	5.40122e-75	4.00729e-73	0.623755	0.459117	0.532428
Tpd52l1	50	9.4078e-75	6.84817e-73	0.598576	0.214512	0.269665
Sdf2l1	51	2.14136e-74	1.52988e-72	0.542614	0.0385811	0.166407
Kcnk1	52	7.64751e-74	5.36438e-72	0.642457	0.198109	0.26618
Enho	2	8.71811e-72	6.00616e-70	0.151014	0.417297	0.870287
2010111I01Rik	53	2.85954e-71	1.93545e-69	0.685967	0.0790124	0.392556
Duox1	50	1.00333e-69	6.67389e-68	0.643126	0.110688	0.647062
Tmed3	32	2.53754e-69	1.65929e-67	0.677115	0.0702703	0.770932
Fam3c	56	3.08527e-69	1.98383e-67	0.610669	-0.121558	0.274454
Hsp90b1	57	3.02207e-68	1.91133e-66	0.696579	-0.0276012	-0.0458149
Olfml3	58	1.17983e-67	7.34159e-66	0.401056	-0.0465272	0.0411834
Spcs2	59	1.98727e-66	1.21697e-64	0.603167	0.103116	0.293661
Csn1s1	60	8.95058e-66	5.39552e-64	1.44576	-0.0222245	0.928718
Slc35a1	61	1.20625e-65	7.15954e-64	0.536889	0.165833	0.380874
Sdhb	62	2.48512e-65	1.44618e-63	0.535463	0.126781	0.174726
Ddost	63	2.51151e-65	1.44618e-63	0.590711	0.0439408	0.302681
Trf	59	1.01777e-62	5.69066e-61	0.744437	-0.0571853	0.724746
Chn2	64	1.00509e-62	5.69066e-61	0.44446	0.100069	0.242868
Psma4	66	6.51111e-62	3.58855e-60	0.549559	0.145686	0.00251352
Nucb2	67	1.16778e-61	6.34546e-60	0.611954	-0.10631	0.448291
Anxa6	68	2.02294e-61	1.08396e-59	0.567364	-0.108127	0.231496
Foxi1	8	2.58749e-61	1.36747e-59	0.22492	0.33847	0.101532
Tspan3	69	9.94436e-61	5.18451e-59	0.575671	0.0458987	0.291469
Slc31a2	14	2.14179e-60	1.10174e-58	0.556362	0.382746	0.699014
Sumo3	71	3.41542e-60	1.73377e-58	0.510791	0.208911	-0.0688817
Fdps	72	6.40083e-60	3.20706e-58	0.431014	0.0122985	-0.293359
Tspan13	73	1.91049e-59	9.44958e-58	0.548894	0.011461	-0.159831
Pycard	74	3.17692e-59	1.55146e-57	0.496204	0.194221	0.0598869
Car2	75	3.28633e-59	1.58483e-57	0.518507	-0.0665966	-0.41404
Kcnn4	11	5.5271e-59	2.63254e-57	0.718007	0.526035	0.537556
Csn3	77	7.5488e-59	3.55162e-57	1.06249	-0.29233	0.56206
Ctnnbip1	78	5.93809e-58	2.76014e-56	0.493873	0.0552914	0.0964726
Mfge8	79	9.96672e-58	4.57757e-56	1.03054	-0.390256	0.271481
Hey1	9	1.11501e-57	5.06082e-56	0.245375	0.434781	0.283223
Ncald	10	4.78572e-57	2.1469e-55	0.182653	0.525291	0.682743
Scrg1	71	7.36327e-57	3.26523e-55	0.60838	0.00616476	0.573284
Pycr2	81	4.75263e-56	2.0836e-54	0.498141	0.17518	0.12363
Erp29	82	5.899e-55	2.55712e-53	0.490701	0.0116624	-0.0713449
Pdzk1ip1	4	7.42906e-55	3.18459e-53	0.0702155	-0.042237	0.637601
Pdia3	83	2.52622e-54	1.07101e-52	0.583383	-0.0781417	0.0560313
Cisd1	84	3.00869e-54	1.26169e-52	0.452281	0.165779	-0.0777736
Gale	85	1.55334e-53	6.44386e-52	0.328773	0.0768004	0.0894977
Il20rb	16	2.93354e-53	1.204e-51	0.447266	0.375323	0.211377
Etnk1	6	3.68544e-53	1.49668e-51	0.497689	0.335642	0.897621
Rap1gap	8	2.08653e-52	8.38526e-51	0.150312	0.198119	0.50023
Sec61g	87	9.1941e-52	3.65679e-50	0.52392	-0.0307207	0.0311487
Afap1l1	88	4.64341e-51	1.8122e-49	0.350416	0.135349	0.113637
Btn1a1	89	4.65029e-51	1.8122e-49	0.431404	0.0654874	0.405949
B4galt6	73	2.85037e-50	1.09967e-48	0.484117	0.248994	0.3986
Cnp	91	1.67082e-49	6.38221e-48	0.358583	0.0522804	0.0914259
Plin2	10	3.30617e-49	1.25051e-47	0.233473	0.305402	0.988255
Xbp1	11	3.61258e-49	1.35314e-47	0.423482	0.453714	0.953768
Casp1	92	1.03741e-48	3.8484e-47	0.405219	0.186495	0.30109
AC168977.1	93	2.44389e-48	8.97954e-47	0.538063	0.029899	0.349761
Apoc1	12	2.91684e-48	1.06162e-46	-0.350918	0.162602	0.933585
St3gal5	94	6.95433e-48	2.50746e-46	0.428189	0.0710007	0.333074
Fam174b	83	8.48432e-48	3.03079e-46	0.442277	0.132406	0.421694
Timm10b	96	1.38314e-47	4.89556e-46	0.455124	0.0694875	0.00248675
Tcn2	35	3.94035e-47	1.38199e-45	0.551601	0.114782	0.673114
Scd2	98	4.36262e-47	1.5163e-45	0.461567	0.138922	0.117204
Smpdl3a	13	5.0666e-47	1.74526e-45	0.0130389	0.0409978	0.733835
Secisbp2l	50	9.94128e-47	3.39411e-45	0.534714	0.303254	0.449862
Stk11	15	1.89767e-46	6.42212e-45	0.202644	0.249457	0.620982
H13	100	3.90566e-46	1.31026e-44	0.485217	0.0386304	0.412793
St6galnac4	24	4.22855e-46	1.40636e-44	0.507703	0.37748	0.516249
Ppdpf	102	7.00444e-46	2.30967e-44	0.482737	0.125506	0.100605
Pik3r1	16	8.9943e-46	2.94068e-44	-0.183123	-0.233755	0.870655
Fam20a	17	4.01184e-45	1.30065e-43	0.323535	0.265445	0.648627
Mphosph6	18	5.58073e-45	1.7942e-43	0.33209	0.287612	0.00478486
Selenos	104	6.18386e-45	1.97168e-43	0.465336	0.144004	0.410313
Rab3a	12	6.74416e-45	2.1327e-43	0.11972	0.172737	0.06336
Rbm3	105	1.03273e-44	3.23925e-43	0.496674	-0.0870047	-0.266515
Ormdl2	106	1.13346e-44	3.52651e-43	0.424044	0.00926494	0.0572496
Timm17a	105	1.36921e-44	4.22593e-43	0.450947	0.202926	-0.0161837
Rab29	68	3.26132e-44	9.98586e-43	0.350322	0.175337	0.340532
Tesc	109	1.32193e-43	4.01575e-42	0.597413	0.168143	0.257732
Rab17	18	1.48358e-43	4.45442e-42	-0.024787	0.119874	0.388181
Smim14	110	1.48942e-43	4.45442e-42	0.474052	0.15346	0.442198
Lhfp	111	3.35355e-43	9.9523e-42	0.321511	0.0720572	0.127069
Car6	19	3.43399e-43	1.01132e-41	0.0544647	0.41058	1.36951
Smdt1	112	4.46011e-43	1.30357e-41	0.44565	0.00743016	0.00638634
Uqcrq	113	4.59367e-43	1.33251e-41	0.464641	-0.0216804	-0.303013
Smagp	28	5.49364e-43	1.56996e-41	0.504718	0.210308	0.646776
Rwdd1	114	5.49248e-43	1.56996e-41	0.411754	-0.00690573	-0.199918
Idh3a	116	5.75739e-43	1.63323e-41	0.377503	0.0404742	-0.192108
Abracl	117	7.71248e-43	2.17188e-41	0.44668	0.0625458	0.0674055
Rpn1	118	9.8327e-43	2.74888e-41	0.376213	-0.00157142	0.00773444
Slc35b1	119	6.05333e-42	1.68012e-40	0.31563	-0.0420741	-0.0551846
Sec13	120	6.5949e-42	1.81737e-40	0.321844	-0.0347804	-0.0483832
Mrps6	49	7.09651e-42	1.94172e-40	0.475145	0.282817	0.212967
Psmb3	122	1.12726e-41	3.06264e-40	0.442127	-0.0235934	-0.208367
Stk39	123	1.23343e-41	3.32767e-40	0.44599	0.0883362	0.170655
Lyzl4	20	1.91362e-41	5.12691e-40	-0.0450886	0.0870029	0.396287
Abhd14b	21	2.00319e-41	5.32986e-40	0.0983021	0.085377	0.473391
Herpud1	15	3.2143e-41	8.49368e-40	0.193125	0.38617	0.39906
Mfsd4a	23	9.00068e-41	2.36222e-39	0.14096	0.178586	0.367552
Arg1	42	1.19976e-40	3.12748e-39	0.635372	0.20697	1.05841
Ndufa1	125	1.51524e-40	3.92336e-39	0.430298	-0.0737075	0.294955
Fkbp2	126	5.02608e-40	1.29271e-38	0.443507	-0.0263304	-0.102785
Ss18l2	20	5.46023e-40	1.39507e-38	0.483281	0.389745	0.216368
Prr5	17	6.30906e-40	1.60134e-38	0.202053	0.215583	0.0941919
Efhd1	128	8.61734e-40	2.17292e-38	0.372538	-0.0604236	0.257005
Dynll1	129	8.76547e-40	2.19592e-38	0.502127	-0.125885	-0.673666
Etv5	43	2.66192e-39	6.6256e-38	0.35058	0.24306	0.218304
Chad	25	2.77729e-39	6.86844e-38	0.0288723	0.19342	0.502574
Phgdh	131	3.10646e-39	7.63357e-38	0.274911	0.00706808	-0.422056
Mrpl57	132	4.44247e-39	1.08475e-37	0.391749	0.0955373	-0.261342
Akap12	133	5.48937e-39	1.33195e-37	0.282744	0.14449	-0.139644
Flvcr2	47	1.06485e-38	2.56762e-37	0.282091	0.201437	0.240462
Cldn10	26	2.57325e-38	6.16622e-37	-0.448703	0.408371	0.864982
Surf4	136	3.02498e-38	7.20392e-37	0.404588	0.00601623	0.15108
Hnrnpa2b1	137	3.09748e-38	7.33134e-37	0.45802	-0.0175042	-0.431547
Hspa5	138	7.79903e-38	1.83467e-36	0.557791	-0.139405	-0.158946
Dnajb11	139	1.46494e-37	3.42529e-36	0.341771	0.00970967	-0.0493008
Slc6a2	29	1.57557e-37	3.66177e-36	0.28907	0.176876	0.4633
Adig	30	2.08455e-37	4.81568e-36	0.250113	0.0694864	0.751166
Snap23	138	5.35848e-37	1.23054e-35	0.337837	-0.0108513	0.307273
Mlec	141	5.91132e-37	1.34946e-35	0.406592	-0.112402	0.0364953
Klhdc7a	29	8.9688e-37	2.03539e-35	0.126874	0.189492	0.245339
Rpn2	142	1.58536e-36	3.57679e-35	0.439774	-0.122699	-0.00238055
Gm16136	22	2.26556e-36	5.0817e-35	0.154516	0.297192	0.350779
Gdpd3	33	3.29454e-36	7.34701e-35	-0.215951	-0.0152651	0.46434
Gm48882	91	4.00004e-36	8.86905e-35	0.400309	0.230652	0.254902
Dhrs4	144	5.22314e-36	1.15148e-34	0.367139	0.0346971	-0.088953
Nupr1	34	6.65407e-36	1.4586e-34	-0.296325	-0.0282412	0.817478
Slco2a1	145	8.12209e-36	1.77034e-34	0.422911	0.0259508	0.36313
Map1lc3a	80	1.17438e-35	2.54538e-34	0.465999	-0.00463713	0.548066
Ypel3	37	1.43547e-35	3.09387e-34	-0.234719	0.142904	0.560194
Uqcc2	147	2.62877e-35	5.63432e-34	0.391822	0.00125538	-0.227644
Tmsb4x	149	3.54254e-35	7.55089e-34	0.483254	-0.250169	0.374399
Cldn8	150	1.27738e-34	2.70777e-33	0.199363	0.0507095	0.119869
Hsd17b12	151	1.34858e-34	2.84307e-33	0.335224	0.0195542	-0.0508885
Cenpx	152	1.35882e-34	2.84909e-33	0.39527	0.0607462	-0.243527
Pycr1	153	1.51622e-34	3.16194e-33	0.26469	0.0609624	0.136587
Igfbp5	38	1.53586e-34	3.18566e-33	-0.311409	-0.0159299	1.14714
Ddah1	154	1.87486e-34	3.86803e-33	0.254335	0.00599249	-0.0892044
Tspan8	39	2.05738e-34	4.222e-33	0.334428	-0.0161684	0.929042
1810043G02Rik	56	3.21046e-34	6.55342e-33	0.416745	0.270042	0.516463
Selenop	40	1.9943e-33	4.04949e-32	-0.0702535	0.0530378	0.57532
Dhrs7	156	2.32629e-33	4.69886e-32	0.356618	0.145252	0.110127
Slc35b2	157	3.96243e-33	7.96201e-32	0.349163	0.0974915	-0.0487173
Mlph	41	4.41907e-33	8.83357e-32	0.116131	0.191801	0.366847
Csad	158	5.07366e-33	1.00898e-31	0.365859	0.0909102	0.203995
Fam210b	159	5.89235e-33	1.16578e-31	0.318837	0.0314457	0.190563
Gata3	25	5.92398e-33	1.16606e-31	0.37135	0.382125	0.415173
Hagh	160	8.70495e-33	1.70476e-31	0.346488	0.143849	0.249752
Tmem238	161	9.24642e-33	1.80165e-31	0.375275	0.0450859	-0.0686619
Fkbp4	162	1.38499e-32	2.68507e-31	0.402151	0.135213	-0.139644
Tspan14	117	2.81013e-32	5.42075e-31	0.33095	0.178868	0.145663
Bmyc	26	4.05297e-32	7.76834e-31	0.314602	0.297309	0.141282
Ano1	43	4.06741e-32	7.76834e-31	0.397876	0.16185	0.592333
Ctsh	44	4.39741e-32	8.35725e-31	0.393777	-0.0691975	0.652006
Tmem258	164	5.68296e-32	1.07475e-30	0.392797	-0.0183064	0.331235
Lsm4	165	6.50023e-32	1.22331e-30	0.367769	0.0357618	-0.210192
Mrpl18	76	6.59305e-32	1.23476e-30	0.307529	0.196858	-0.314008
Pxmp4	167	7.59807e-32	1.4161e-30	0.313137	0.103562	0.0489369
Tfap2c	27	8.39994e-32	1.55803e-30	0.293844	0.332069	0.130309
Slc50a1	168	1.19051e-31	2.19761e-30	0.325233	0.0400839	0.12696
Ank	45	1.21714e-31	2.23606e-30	0.00367156	0.0293732	0.323712
Pink1	46	2.79841e-31	5.11671e-30	0.0794606	-0.0824082	0.512098
2610524H06Rik	169	3.50018e-31	6.36967e-30	0.235807	0.000950539	-0.396735
Slc25a39	170	4.79065e-31	8.67715e-30	0.363833	-0.0976448	-0.119338
Sulf2	171	5.72274e-31	1.0317e-29	0.331473	-0.025723	0.07676
Slc25a34	172	9.21199e-31	1.65302e-29	0.282938	0.0774757	0.193606
Ninj1	173	9.70306e-31	1.73307e-29	0.344254	0.15015	0.262861
Bin1	154	1.41258e-30	2.5114e-29	0.389727	0.0852395	0.362539
4931406C07Rik	175	1.45267e-30	2.57083e-29	0.404508	-0.00603397	0.0310795
Ogfrl1	176	1.48111e-30	2.60919e-29	0.456038	0.0392219	0.386989
Lrrc26	129	1.89853e-30	3.32933e-29	0.281452	0.171935	0.192807
Rab4a	47	2.33039e-30	4.06816e-29	0.328973	0.250287	0.443474
Mrps28	178	2.50513e-30	4.3535e-29	0.299621	0.0245099	-0.186546
Slc12a2	48	2.57258e-30	4.45069e-29	0.141051	0.233461	0.69004
Tc2n	100	3.33155e-30	5.73801e-29	0.258452	0.160755	0.0707349
Ppfibp2	28	4.16087e-30	7.13451e-29	0.176454	0.253097	0.241221
Dhrs3	49	5.80172e-30	9.904e-29	-0.0994314	0.146852	0.334387
Flrt3	180	6.7294e-30	1.1437e-28	0.205001	0.0180375	-0.0599796
Faim2	181	1.33095e-29	2.25211e-28	0.460102	0.202688	0.349949
Creld2	182	1.75219e-29	2.95195e-28	0.283492	-0.0283797	-0.0928273
Coq9	138	2.68527e-29	4.50425e-28	0.30306	0.158951	0.25835
Bckdk	185	3.36978e-29	5.62797e-28	0.343747	0.147656	0.15343
Urah	51	3.65776e-29	6.0826e-28	0.294904	-0.0163261	0.567497
Agt	52	4.9298e-29	8.16273e-28	0.115229	0.0753892	0.343336
Itgb5	62	6.96284e-29	1.14798e-27	0.345606	-0.00885143	0.46879
Ggh	53	9.69484e-29	1.5916e-27	0.235351	0.0510435	0.48958
Srebf1	54	1.17511e-28	1.921e-27	0.170942	0.220202	0.719946
Hnrnpa1	187	1.2543e-28	2.04181e-27	0.389983	-0.137166	-0.341687
Adrb1	30	2.00185e-28	3.24502e-27	0.141828	0.223196	0.192058
Fam212a	31	2.32734e-28	3.75685e-27	0.113154	0.152352	0.132518
Sod3	55	2.77823e-28	4.466e-27	0.125747	0.0391485	0.416634
Ada	189	3.24465e-28	5.19413e-27	0.173624	-0.0367896	-0.13604
Mtss1	190	3.45023e-28	5.50041e-27	0.433501	0.0446571	0.235421
Clic6	57	4.99241e-28	7.92623e-27	-0.332718	0.173111	0.603251
C530043A13Rik	58	5.11001e-28	8.07969e-27	0.133617	0.00430586	0.77945
1500011K16Rik	193	7.61472e-28	1.19909e-26	0.3007	0.118509	0.155954
C5ar2	46	8.57042e-28	1.34409e-26	0.181169	0.203336	0.305095
Glb1	61	1.03471e-27	1.60964e-26	0.297118	-0.00576493	0.441221
Pdap1	194	1.03382e-27	1.60964e-26	0.351167	0.0226283	-0.403611
Tceal9	195	1.19179e-27	1.84655e-26	0.41073	-0.161358	-0.24854
Ptgr1	196	1.57515e-27	2.43077e-26	0.179226	-0.0426671	-0.0832276
Dtymk	197	1.80727e-27	2.77787e-26	0.269522	-0.00204814	-0.609981
Eid1	162	1.88499e-27	2.88583e-26	0.311069	0.155777	0.281772
Mettl9	157	2.71702e-27	4.14319e-26	0.368643	0.176001	0.0958685
Fam213a	63	2.8689e-27	4.35757e-26	0.205277	0.0463035	0.472153
Nudt4	200	3.00841e-27	4.55154e-26	0.381096	-0.034653	-0.0119811
Acsf2	64	3.03036e-27	4.56684e-26	0.176273	0.139562	0.389395
Kctd14	32	3.54913e-27	5.32783e-26	0.113906	0.144047	0.063064
Itm2c	65	3.60218e-27	5.38652e-26	0.305722	-0.0442114	0.500066
Dhrs1	201	3.91078e-27	5.8254e-26	0.320616	-0.0506358	0.191898
Yipf2	66	4.97868e-27	7.3876e-26	0.184167	0.0482859	0.295641
Mcrip1	202	6.04807e-27	8.94001e-26	0.330899	0.0921538	0.233613
Rdh12	33	6.48956e-27	9.55599e-26	0.329968	0.322602	0.388213
Anpep	67	7.91843e-27	1.16157e-25	0.0722347	-0.0724095	0.386078
Mmp16	204	7.97669e-27	1.16568e-25	0.263826	0.0514479	0.219972
Ramp1	150	1.2848e-26	1.87047e-25	0.492856	-0.213098	0.553097
Tinagl1	206	2.94722e-26	4.27458e-25	0.322179	0.0273243	0.20159
Grhpr	169	3.31182e-26	4.7854e-25	0.332759	0.16122	0.262018
H2-D1	70	5.59655e-26	8.05653e-25	0.190563	-0.028072	0.876129
Pbk	208	6.27025e-26	8.9928e-25	0.191336	0.0423385	-1.17124
Rbp1	209	6.86699e-26	9.81217e-25	0.533481	-0.208705	0.257562
Spry1	113	8.07241e-26	1.1492e-24	0.175938	0.121948	-0.0350845
Srsf3	211	9.4876e-26	1.3457e-24	0.37392	0.0852762	-0.490694
Cck	72	1.29992e-25	1.83703e-24	0.203574	0.127939	0.578411
Pdcd4	75	1.40062e-25	1.97212e-24	0.360747	0.173021	0.4718
Cracr2b	53	1.98458e-25	2.78419e-24	0.0473443	0.272736	0.448522
Zfp467	74	2.36567e-25	3.3068e-24	-0.0877172	0.0910593	0.255758
Scd1	76	3.63919e-25	5.06859e-24	0.344732	-0.162871	0.789936
Sox10	35	4.45886e-25	6.18788e-24	0.242426	0.254666	0.108065
Retreg1	211	4.97755e-25	6.88294e-24	0.315672	0.151155	0.253852
Fah	215	7.15333e-25	9.85627e-24	0.267425	-0.00509872	0.219462
Trabd	118	8.46227e-25	1.16183e-23	0.301117	0.183211	0.223662
B2m	79	8.97566e-25	1.22795e-23	0.186729	0.0346889	1.00836
Limch1	217	1.58011e-24	2.15409e-23	0.212084	0.0180693	-0.127439
Impa2	218	1.7181e-24	2.33396e-23	0.217134	0.0634788	-0.190761
Dnajc3	219	1.74496e-24	2.36212e-23	0.329855	-0.0429598	0.110789
Serpinh1	220	2.25023e-24	3.03546e-23	0.319525	-0.0374921	0.00116274
Smim5	36	2.37896e-24	3.19498e-23	0.100828	0.126263	0.125712
Ppa1	221	2.38506e-24	3.19498e-23	0.227076	-0.11342	-0.194171
Hcfc1r1	81	3.19553e-24	4.26587e-23	0.13797	0.0549817	0.551092
Egf	82	3.38392e-24	4.50178e-23	0.056149	0.063972	0.15839
Homer2	223	6.27947e-24	8.32516e-23	0.320554	0.0619046	0.10086
2810001G20Rik	153	6.63902e-24	8.77169e-23	0.201598	0.114268	-0.0856098
Qsox1	84	6.77769e-24	8.92434e-23	0.124139	-0.10257	0.611181
Cdc42ep5	85	7.37158e-24	9.67332e-23	0.115089	0.100273	0.296422
Gm31108	86	9.44866e-24	1.23569e-22	0.129466	0.0949942	0.240378
P4hb	225	1.40479e-23	1.83097e-22	0.348025	-0.109666	-0.0999404
Lbp	216	2.10773e-23	2.73792e-22	0.433187	-0.436533	0.434892
Zfp36	38	2.32153e-23	3.00552e-22	-0.0209221	0.493038	0.535214
Aldh3b2	94	2.36809e-23	3.05555e-22	0.248663	0.162629	0.339147
Ucp2	228	2.54844e-23	3.2773e-22	0.347809	-0.0918758	0.15282
Hnrnpa3	229	3.01465e-23	3.86396e-22	0.313355	-0.00723164	-0.636826
Hibadh	89	3.14528e-23	4.00478e-22	0.0044524	0.0823477	0.348385
Cks1b	230	3.13885e-23	4.00478e-22	0.20919	0.0209831	-0.518196
Aldoa	90	3.33945e-23	4.23803e-22	-0.637874	0.173654	0.895631
Acss1	106	5.10581e-23	6.45843e-22	0.249778	0.152435	0.309187
Socs2	91	5.75873e-23	7.26052e-22	0.260021	0.0150315	0.549703
P2rx4	92	6.01764e-23	7.56224e-22	0.0933838	0.0601136	0.417583
Ptpre	233	6.48227e-23	8.11967e-22	0.158337	0.0603857	0.0817887
Dynlt3	121	6.86016e-23	8.5652e-22	0.303977	0.0588556	0.383679
Camkk2	235	1.15469e-22	1.43703e-21	0.222547	-0.0154177	0.057272
Pmvk	237	1.48566e-22	1.84298e-21	0.273864	-0.129337	0.0675823
Cst3	239	1.74746e-22	2.1608e-21	0.405692	-0.0397419	0.000890504
Runx1	95	1.75939e-22	2.1686e-21	-0.307323	-0.243143	0.303659
Krcc1	240	1.79505e-22	2.20551e-21	0.294455	0.122599	0.0662313
Elf5	96	2.03179e-22	2.48846e-21	0.194799	0.175384	0.402357
Hlf	241	2.16979e-22	2.64906e-21	0.266154	-0.0395394	0.19971
Mxd4	97	2.69277e-22	3.27719e-21	0.229884	0.00785055	0.380968
Vsnl1	242	2.93944e-22	3.56615e-21	0.140007	0.0786657	0.0858874
Sae1	243	3.85379e-22	4.66078e-21	0.213833	0.069982	-0.396389
Bhlhe40	40	4.16845e-22	5.02559e-21	0.0412282	0.341513	0.358042
Bckdha	232	5.01934e-22	6.0326e-21	0.297125	0.0728668	0.341575
Rsrp1	98	5.06003e-22	6.06261e-21	-0.253949	-0.0561366	0.452712
Bhlha15	41	5.48136e-22	6.54709e-21	0.129287	0.132686	0.105807
Zfp395	42	5.52795e-22	6.58236e-21	0.0746505	0.182201	0.104443
Bola3	245	5.59616e-22	6.64307e-21	0.2661	0.0457148	-0.147828
Ddo	99	5.91787e-22	7.00342e-21	0.112684	0.0739572	0.253147
Bricd5	101	6.6768e-22	7.8774e-21	0.24643	0.231327	0.625569
Shisa2	70	7.20906e-22	8.46037e-21	0.187652	0.153388	0.0907821
Hk1	247	7.21478e-22	8.46037e-21	0.306061	0.104909	0.0337445
Sod2	102	8.77174e-22	1.0255e-20	-0.156934	-0.350378	0.47172
Lmod1	166	1.10217e-21	1.28465e-20	0.20692	0.0682572	0.234576
Ppp1cb	103	1.19167e-21	1.38478e-20	0.201355	0.13883	0.416382
Tgfb3	104	1.34585e-21	1.55924e-20	0.0999672	0.0681365	0.363723
Fam96a	249	1.35987e-21	1.57077e-20	0.254119	0.111863	-0.158009
Gfra4	250	1.65388e-21	1.90468e-20	0.0912907	0.00849694	-0.0307402
Irs2	44	1.85184e-21	2.12631e-20	0.10033	0.136897	0.096637
Pqlc1	105	2.02987e-21	2.32381e-20	0.0816627	-0.310947	0.535069
Hist1h4i	45	2.06189e-21	2.35348e-20	0.0137961	0.257925	0.295805
Tspan15	251	2.18191e-21	2.48313e-20	0.302225	0.112032	0.280873
B4galnt1	107	2.6737e-21	3.03386e-20	0.0386419	0.030299	0.359259
Inhbb	67	3.81052e-21	4.31114e-20	0.0354089	0.189791	0.288706
Ccdc25	252	5.53618e-21	6.2452e-20	0.224574	0.0418017	0.124407
Cdk2ap1	253	6.71581e-21	7.53666e-20	0.261585	0.0288356	-0.193829
Ran	254	6.72009e-21	7.53666e-20	0.321981	-0.112933	-1.27105
Phyh	109	7.5026e-21	8.38986e-20	0.244417	0.0861705	0.402321
Atp1b1	255	1.20641e-20	1.34519e-19	0.322871	0.0260969	-0.0584328
Use1	110	1.21889e-20	1.35518e-19	-0.331752	-0.0598708	0.463927
4631405J19Rik	256	1.24232e-20	1.37726e-19	0.132709	0.0334091	0.0530151
Gm33586	48	1.397e-20	1.5443e-19	0.148876	0.151891	0.177562
E030013I19Rik	258	1.4985e-20	1.65177e-19	0.153584	-0.0516651	-0.00287776
Arhgap31	51	1.51098e-20	1.66078e-19	0.297374	0.280909	0.38879
Fermt2	260	1.69533e-20	1.85812e-19	0.341624	-0.0690529	0.234844
Sytl1	111	1.94153e-20	2.12193e-19	0.169143	0.0497768	0.30843
Cited2	54	3.19064e-20	3.47726e-19	0.0933676	0.325046	-0.0715174
Snrnp27	71	3.47315e-20	3.77448e-19	0.266045	0.215847	0.0337447
Capn9	112	4.09156e-20	4.43406e-19	0.0159609	0.0460211	0.196165
Rraga	262	4.87651e-20	5.26991e-19	0.249052	0.0856131	0.231313
Uchl3	263	5.66663e-20	6.10667e-19	0.24826	-0.0900032	-0.364975
Stard5	265	6.91174e-20	7.42771e-19	0.185968	0.0886131	0.099486
Canx	266	7.16846e-20	7.6822e-19	0.282311	-0.0369671	-0.00468823
Cers2	267	1.09404e-19	1.1692e-18	0.266059	0.00621021	0.00413064
Hspe1	268	1.78669e-19	1.90416e-18	0.324423	-0.0339922	-0.463946
Rassf3	55	1.83068e-19	1.94566e-18	0.316844	0.286269	0.33564
Tram1	269	2.07241e-19	2.19653e-18	0.3101	0.00930057	0.280423
Arf4	271	3.24423e-19	3.42911e-18	0.300417	-0.00385001	0.0118943
2310039H08Rik	198	3.27263e-19	3.44967e-18	0.248421	0.139427	0.280281
Got1	273	3.34281e-19	3.51405e-18	0.254077	-0.10615	0.207809
Magt1	274	3.66761e-19	3.84501e-18	0.234374	-0.0114617	0.0927324
Plekhf1	57	3.75645e-19	3.92747e-18	0.071208	0.1297	0.0921962
Col11a1	275	4.5485e-19	4.74274e-18	0.269923	-0.111045	-0.611174
Cnpy3	276	4.67649e-19	4.86304e-18	0.196638	0.0898831	0.155068
Lamp2	119	5.1447e-19	5.33556e-18	-0.144411	-0.197888	0.366867
Ormdl3	120	5.36498e-19	5.54908e-18	0.176943	0.0995195	0.318263
Mia	277	5.89066e-19	6.07652e-18	0.375157	-0.0718125	0.244593
Hsbp1l1	123	7.60265e-19	7.8216e-18	0.165843	0.127551	0.285526
Entpd2	124	9.07927e-19	9.31591e-18	-0.0178077	0.0215889	0.255086
Acpp	125	9.30056e-19	9.51765e-18	-0.107572	-0.0432453	0.131979
Fdx1	126	9.48271e-19	9.67839e-18	0.155256	0.0907727	0.3297
Eva1b	127	9.95471e-19	1.01333e-17	0.204721	0.041221	0.291947
Gstt3	137	1.04978e-18	1.06581e-17	0.241459	0.121092	0.323067
Pigp	128	1.11417e-18	1.12821e-17	0.238414	0.0713962	0.361524
Perp	282	1.55099e-18	1.56642e-17	0.273081	-0.0192183	0.0607657
Tmem141	283	1.72084e-18	1.73342e-17	0.201251	0.0757308	0.150471
Plin3	92	2.02068e-18	2.03016e-17	0.286823	0.206165	0.284476
Dkkl1	130	2.23308e-18	2.23772e-17	-0.180236	0.0438688	0.443649
Gm20442	131	2.39843e-18	2.39719e-17	0.0185299	0.0134221	0.0938414
Fzd9	59	2.44574e-18	2.43816e-17	0.11475	0.140498	0.0804163
Ccdc28b	62	2.46015e-18	2.4462e-17	0.148008	0.139913	0.156825
Cycs	288	2.52122e-18	2.50048e-17	0.300468	-0.151233	-0.638301
Sytl3	60	2.59698e-18	2.56901e-17	0.0805686	0.139499	0.160383
Pold4	132	2.69445e-18	2.65861e-17	0.0668502	0.0476183	0.345007
Fundc2	289	3.69088e-18	3.6325e-17	0.287654	0.00208928	0.162677
Gprc5b	134	3.84708e-18	3.7766e-17	-0.0124482	0.0797205	0.184898
Slc41a1	136	4.97312e-18	4.86962e-17	0.065038	0.0760541	0.258046
Mgat2	290	5.77169e-18	5.63726e-17	0.259153	0.026924	0.0301375
Cyb5a	139	6.16232e-18	6.0036e-17	0.220296	0.107718	0.411098
Syn2	174	6.88751e-18	6.6932e-17	0.151277	0.0606092	0.183241
H1f0	63	8.39011e-18	8.13293e-17	0.0632805	0.319144	0.219432
Etv1	103	8.78578e-18	8.49512e-17	0.301057	0.213421	0.171243
Cotl1	293	1.05473e-17	1.01729e-16	0.271524	0.106949	0.043194
Dok1	64	1.24918e-17	1.20183e-16	0.13785	0.152316	0.0746622
Sh2d3c	65	1.26744e-17	1.21636e-16	0.0407214	0.0750291	0.0386363
H2-K1	142	1.37014e-17	1.31166e-16	0.305246	-0.0616923	0.598862
Ogt	143	1.53397e-17	1.46486e-16	-0.228572	-0.0475607	0.354506
1700012B07Rik	294	1.75181e-17	1.66876e-16	0.142217	0.0338648	0.106533
Smco4	123	1.7859e-17	1.69704e-16	0.174467	0.131473	0.0761635
Ctsz	296	2.0468e-17	1.94018e-16	0.271096	-0.101739	0.0976473
Mansc1	144	2.15288e-17	2.03574e-16	0.229675	0.162853	0.311698
Shisa5	145	2.40477e-17	2.26837e-16	0.0293038	-0.025257	0.349026
Il17re	158	2.86379e-17	2.69475e-16	0.245361	0.138235	0.325628
Ccser2	75	3.05393e-17	2.86668e-16	0.220902	0.20031	0.161255
Srpr	146	3.16322e-17	2.96207e-16	0.12931	-0.0714376	0.357093
Lurap1	196	3.37114e-17	3.14911e-16	0.161609	0.102787	0.104777
Mocos	300	3.42675e-17	3.19333e-16	0.148414	0.0738299	0.126364
Cd1d1	167	3.53006e-17	3.28168e-16	0.19734	-0.0244767	0.215354
Palmd	302	3.60198e-17	3.34049e-16	0.246727	0.0775985	0.142163
Tnfrsf21	148	4.09883e-17	3.79215e-16	0.041092	-0.0797618	0.190156
Smim19	72	4.14889e-17	3.82929e-16	0.183422	0.203246	0.306205
Cox20	293	4.34109e-17	3.99712e-16	0.263205	0.124059	0.277559
Cpd	151	4.48688e-17	4.12152e-16	0.255498	0.0402163	0.45785
Elovl1	152	5.87314e-17	5.38209e-16	0.084615	-0.0719408	0.314033
Psmb9	305	6.43137e-17	5.87968e-16	0.190093	0.0470509	-0.1009
Lgals3bp	182	7.10793e-17	6.48284e-16	0.258635	-0.0174261	0.283856
Arfgap3	307	8.65326e-17	7.87365e-16	0.218927	-0.0575146	0.0479287
Clu	155	8.7894e-17	7.9787e-16	0.123697	-0.530343	0.745922
Barx2	69	9.47266e-17	8.57876e-16	0.206982	0.196529	0.240942
Atxn1	308	1.04109e-16	9.40639e-16	0.224657	0.0123212	0.114073
Smoc2	156	1.1256e-16	1.01462e-15	0.0635631	0.0885894	0.259258
Creb3l1	310	1.28088e-16	1.1519e-15	0.185268	0.0657988	0.114556
Tceal8	311	1.3422e-16	1.20424e-15	0.251948	0.0318752	0.0243661
Tulp1	159	1.51353e-16	1.3548e-15	0.0112662	0.0459951	0.160418
Plb1	161	1.63428e-16	1.4595e-15	0.224113	0.162689	0.637074
1110032A03Rik	162	1.65566e-16	1.47518e-15	0.0723142	0.0610608	0.255322
Sh3bp5	163	1.75687e-16	1.56122e-15	0.131004	0.00253195	0.264164
Orai1	312	1.76032e-16	1.56122e-15	0.241524	-0.0939239	0.0366066
Psmc2	313	1.87351e-16	1.6578e-15	0.233988	0.00802054	-0.204951
Morf4l2	314	1.92238e-16	1.69715e-15	0.260659	-0.159434	-0.1045
Trim7	164	2.10519e-16	1.85429e-15	-0.0171106	-0.0618267	0.246532
Cavin2	315	2.31214e-16	2.03194e-15	0.146996	0.0671967	-0.119314
Auts2	165	2.6245e-16	2.3012e-15	0.120933	0.154265	0.435175
Elovl6	317	3.09181e-16	2.70481e-15	0.130024	0.0127089	-0.0829209
Kcnj8	214	3.22477e-16	2.81474e-15	0.111631	0.0407654	0.142442
Csn2	319	3.47866e-16	3.0295e-15	0.483827	-0.224654	-0.0332674
Arhgap8	154	3.86949e-16	3.36228e-15	0.182439	0.123158	0.210015
Acads	322	5.47824e-16	4.74945e-15	0.205957	0.0107543	0.155669
H2-T23	169	9.19766e-16	7.95618e-15	0.00765424	0.0807097	0.374389
Egr1	77	9.27065e-16	8.00138e-15	-0.00434873	0.187709	0.0530983
Mpc1	325	9.3123e-16	8.01939e-15	0.267932	-0.0389521	0.183192
Gm16124	170	9.55539e-16	8.2104e-15	-0.00145986	0.0216463	0.178988
Dexi	78	9.9178e-16	8.49624e-15	0.134781	0.168953	0.161255
Slc9a3r2	224	9.9321e-16	8.49624e-15	0.188461	0.10857	0.179654
Pnpla2	171	1.04515e-15	8.92076e-15	-0.119187	0.0632604	0.282853
Hs3st1	160	1.1189e-15	9.52921e-15	0.171186	0.122821	-0.0286011
Ranbp1	328	1.29775e-15	1.1028e-14	0.255274	-0.00836559	-0.871765
Ssb	329	1.53843e-15	1.30445e-14	0.262515	0.0669639	-0.475737
Copz2	222	1.80064e-15	1.52344e-14	0.256199	0.0225166	0.327687
Hnrnpab	331	1.89441e-15	1.59927e-14	0.26369	-0.129836	-0.739115
Sil1	285	1.95867e-15	1.6499e-14	0.206124	-0.0113045	0.206119
Fnbp1l	259	1.9835e-15	1.66718e-14	0.201258	0.114459	-0.0279714
Traf1	175	2.32217e-15	1.9476e-14	-0.0538948	0.0738972	0.122772
Stat5a	176	2.35855e-15	1.97381e-14	0.0757874	-0.0214985	0.236552
Dtx3	179	3.45253e-15	2.88309e-14	-0.178443	0.0390104	0.270314
Pik3ip1	82	3.9e-15	3.24972e-14	0.0605536	0.13219	0.155626
Bcl2	181	4.64858e-15	3.86513e-14	0.0899213	0.0730232	0.202136
Pdia4	336	4.73877e-15	3.93165e-14	0.214479	-0.0269183	0.00972111
Epha2	83	4.99175e-15	4.13265e-14	0.153314	0.163772	0.093238
Me1	339	6.62623e-15	5.47409e-14	0.289023	-0.118104	0.116845
Rmdn1	183	6.8904e-15	5.68017e-14	0.0825157	0.0685303	0.208685
Dbp	152	6.98295e-15	5.74418e-14	-0.109251	0.150598	0.288185
Cdk4	340	7.25473e-15	5.95506e-14	0.234007	-0.0163604	-0.498657
Snrpd1	341	7.33894e-15	6.01139e-14	0.217105	0.0431951	-0.705188
Cgnl1	209	9.6116e-15	7.85626e-14	0.239491	0.129174	0.286458
Cd164l2	187	1.01832e-14	8.30591e-14	0.0580979	0.00230484	0.287651
Cd177	343	1.09762e-14	8.93376e-14	0.0895087	-0.0524839	-0.0642681
Pde4d	188	1.17433e-14	9.53804e-14	-0.088085	0.00570899	0.24272
Gm2a	308	1.197e-14	9.70172e-14	0.246619	0.0304574	0.235026
2810004N23Rik	170	1.31161e-14	1.06084e-13	0.185862	0.127152	0.0240565
Hpcal1	213	1.33066e-14	1.07399e-13	0.167694	0.113391	0.213819
Tecpr1	347	1.38716e-14	1.11725e-13	0.145385	0.0413174	0.0691535
Crabp2	349	1.56267e-14	1.256e-13	0.223755	-0.0213703	0.1493
Iigp1	350	1.66007e-14	1.33151e-13	0.198201	-0.127111	0.040292
Lrrc51	189	1.86192e-14	1.49031e-13	-0.00652583	0.0164061	0.103545
Il15ra	86	2.06295e-14	1.6478e-13	0.0706362	0.115161	0.094908
9130230L23Rik	87	2.26822e-14	1.80801e-13	0.105173	0.11447	0.135235
Pinc	351	2.37629e-14	1.89025e-13	0.123267	-0.00968612	0.0643851
Sidt1	191	2.59958e-14	2.06361e-13	-0.0574839	0.076297	0.189395
Asns	353	3.00094e-14	2.37733e-13	0.157765	-0.0725891	-0.0218264
Adck5	89	3.03211e-14	2.39711e-13	0.0886405	0.140173	0.122897
Gadd45a	192	3.05487e-14	2.41016e-13	-0.0918673	-0.234712	0.254613
Emb	354	3.36198e-14	2.64704e-13	0.117364	-0.0117324	-0.338494
Rbp7	355	3.42627e-14	2.69217e-13	0.19451	0.0270474	-0.522674
Ubl4a	356	3.58389e-14	2.8103e-13	0.226169	0.0272868	-0.0389637
Tnfsf12	194	3.6642e-14	2.86744e-13	0.026137	0.0295098	0.138814
Smim22	195	3.76206e-14	2.93806e-13	0.141896	0.0339361	0.387505
Xdh	196	3.79335e-14	2.95651e-13	0.0496161	-0.185022	0.324606
Anxa5	357	4.02101e-14	3.12763e-13	0.221864	-0.0776876	0.00461933
Psme2	359	6.43299e-14	4.99365e-13	0.233801	-0.0454606	-0.072905
Cdk2ap2	360	7.12641e-14	5.52082e-13	0.218087	0.0779874	0.046757
Gmfg	361	7.26768e-14	5.61898e-13	0.171339	0.0310953	0.0686951
Car8	271	8.0242e-14	6.19147e-13	0.197787	0.103422	0.239362
Igbp1	198	8.1082e-14	6.2438e-13	-0.0171753	-0.00921793	0.279338
Hist1h2bc	94	8.60392e-14	6.61234e-13	0.237718	0.282609	0.5254
Phlda2	93	1.07943e-13	8.27921e-13	0.0494006	0.0998231	0.0668883
Nudt7	200	1.27193e-13	9.7363e-13	0.0875318	0.0697728	0.120514
Slc25a16	201	1.74187e-13	1.33072e-12	0.155831	0.0614682	0.20295
Jpt1	364	1.86537e-13	1.42225e-12	0.235088	-0.0272986	-0.722934
Wwc1	365	1.95473e-13	1.48745e-12	0.191943	0.0381122	0.0142609
Prdx4	366	1.96519e-13	1.49246e-12	0.239069	-0.0473544	-0.321877
Gm32618	108	2.0802e-13	1.5767e-12	0.126122	0.111731	0.0955209
Kcnk5	368	2.13049e-13	1.61165e-12	0.206795	0.0509521	0.131506
Thap3	204	2.2125e-13	1.67042e-12	-0.0233861	0.0920615	0.18019
Os9	205	2.24403e-13	1.69091e-12	0.0503349	-0.0433453	0.297426
Tmem109	370	2.33156e-13	1.75344e-12	0.186079	0.0616795	-0.194011
Plet1	206	2.467e-13	1.85153e-12	-0.235193	-0.524009	0.416789
Casp12	367	2.47159e-13	1.85153e-12	0.195829	-0.0266155	0.185644
S100a16	373	2.66526e-13	1.99275e-12	0.261656	-0.241334	0.187937
Sel1l	374	2.673e-13	1.99467e-12	0.185735	0.093083	0.0657973
Coq8a	207	2.67979e-13	1.99587e-12	-0.00121463	0.046418	0.111104
Mindy2	210	2.89279e-13	2.15036e-12	-0.0131309	-0.0179297	0.232054
Sorbs2	191	3.07711e-13	2.28298e-12	0.227063	0.154096	0.257137
Hdac11	211	3.12614e-13	2.3149e-12	-0.0487267	0.0892549	0.19284
Klf9	212	3.14332e-13	2.32316e-12	-0.121981	-0.00271371	0.265727
Klhdc2	287	3.47949e-13	2.56671e-12	0.213634	0.116744	0.0373727
Pdcd2l	96	4.15333e-13	3.05793e-12	0.106232	0.118719	0.0779712
D730003I15Rik	217	4.37755e-13	3.21687e-12	-0.0323714	0.0299547	0.160617
Sntb2	378	4.58294e-13	3.3614e-12	0.209759	-0.0128045	-0.121662
Arhgef6	218	5.02646e-13	3.67971e-12	-0.18546	0.0216687	0.198321
Acadsb	220	5.34918e-13	3.90855e-12	0.0576858	0.0160196	0.253729
Snx17	225	5.84006e-13	4.25916e-12	0.239366	-0.167038	0.322114
Fasn	379	6.73033e-13	4.89917e-12	0.16068	0.0338011	0.0683478
Fam13a	220	7.2811e-13	5.29011e-12	0.121523	0.151353	0.351314
Socs3	101	7.83986e-13	5.68537e-12	-0.0483913	0.138518	0.0282592
Taf13	380	7.91148e-13	5.72655e-12	0.208826	0.0386413	0.143816
Abhd17c	226	8.14301e-13	5.8831e-12	0.0286947	0.0886695	0.256944
Mospd2	102	8.3161e-13	5.99692e-12	0.150965	0.152194	0.186764
C2cd5	302	9.15471e-13	6.58934e-12	0.139784	0.0816339	0.135349
Tmem50b	254	9.3369e-13	6.70797e-12	0.169587	0.0295795	0.212296
Aqp2	178	1.14941e-12	8.24242e-12	0.0382417	0.0599369	0.0859549
Tsc22d3	104	1.16389e-12	8.33078e-12	0.0833623	0.115993	0.132571
Derl3	385	1.17267e-12	8.37806e-12	0.157214	0.0364202	-0.0832349
Rp9	230	1.22465e-12	8.73328e-12	-0.0599444	0.050215	0.277164
Pdxk	386	1.23396e-12	8.78341e-12	0.156106	0.0178727	0.139699
Muc15	231	1.28693e-12	9.14362e-12	0.0351763	-0.0374325	0.305323
Nr4a1	106	1.32434e-12	9.39214e-12	0.117804	0.163668	-0.0502255
Ctsc	387	1.41213e-12	9.99635e-12	0.147587	-0.008028	-0.02108
Tspan1	388	1.47261e-12	1.04054e-11	0.0987506	-0.0274925	-0.0680803
Pik3c2b	107	1.58425e-12	1.11738e-11	0.0591121	0.100463	0.113954
Trim8	235	1.61859e-12	1.13951e-11	0.0763294	0.102164	0.240643
Il6ra	236	1.7704e-12	1.24411e-11	-0.0265875	-0.00227445	0.124713
Sp140	237	1.79399e-12	1.2584e-11	-0.0395691	0.00192779	0.129644
Spdef	125	2.07307e-12	1.4489e-11	0.0740674	0.0893057	0.122779
Appl2	238	2.07196e-12	1.4489e-11	-0.0912332	0.0627218	0.206571
Ldhb	389	2.48729e-12	1.73526e-11	0.248015	-0.0362404	-0.222912
Rnf43	110	2.78415e-12	1.93885e-11	0.0390227	0.0681644	-0.000992828
Rabep2	111	2.95599e-12	2.05482e-11	-0.0805677	0.144168	0.176584
Psmb8	390	2.97482e-12	2.06418e-11	0.259757	-0.00994843	0.0798248
Tmem176a	391	3.00478e-12	2.08123e-11	0.225681	-0.0484914	0.044703
Pradc1	266	3.6826e-12	2.54614e-11	0.157268	0.0973232	-0.300961
Dctpp1	393	4.10312e-12	2.83181e-11	0.178992	9.82832e-05	-0.687009
Abhd2	242	4.25013e-12	2.92804e-11	0.206275	0.078457	0.264174
Pon3	243	4.53974e-12	3.12198e-11	0.107131	0.0541069	0.151076
9530014B07Rik	394	4.66064e-12	3.19942e-11	0.0870035	0.0357456	0.055023
Tmem154	396	5.15222e-12	3.5306e-11	0.0999605	0.00217412	0.0242671
Fbxo32	114	5.48825e-12	3.7542e-11	0.190461	0.187102	0.125281
Izumo4	244	5.53381e-12	3.77866e-11	0.00416884	0.00352711	0.103591
Smc6	319	5.95081e-12	4.05622e-11	0.178589	0.100907	-0.179537
Shisa8	398	6.04843e-12	4.11549e-11	0.0988885	0.0300818	-0.0744822
Vcp	399	6.12799e-12	4.16229e-11	0.227695	-0.074838	0.0153286
Ak3	401	6.29269e-12	4.26664e-11	0.201034	0.035928	0.181796
Eif4a2	245	6.51726e-12	4.41116e-11	-0.244867	0.0190478	0.32394
Sp110	246	7.1065e-12	4.80156e-11	0.110311	0.0356325	0.147057
Mpped2	116	7.2623e-12	4.89824e-11	0.112937	0.110477	0.0446754
Gm32591	247	7.61754e-12	5.12888e-11	0.020715	0.0197359	0.0474438
Gng12	402	8.02764e-12	5.39558e-11	0.219484	-0.0320662	0.0499189
Acot1	360	8.43592e-12	5.66013e-11	0.176531	0.0890306	0.164557
Nes	404	8.53458e-12	5.71639e-11	0.228087	-0.31288	-0.388985
Fam3a	249	8.99839e-12	6.0166e-11	0.110678	0.0412866	0.201263
Banf1	405	9.03501e-12	6.03064e-11	0.196167	0.0125521	-0.415993
Cpq	252	9.51484e-12	6.33994e-11	0.173476	0.0202827	0.254071
C1galt1c1	274	9.77819e-12	6.50418e-11	0.151518	0.0953425	0.147918
Anp32b	407	1.01459e-11	6.73713e-11	0.24242	-0.245578	-0.859597
Eno1	119	1.03685e-11	6.87312e-11	0.120162	0.192223	0.290962
Hist3h2a	120	1.03988e-11	6.88137e-11	0.0871089	0.146264	0.0376055
Rabep1	161	1.18178e-11	7.80704e-11	0.161416	0.130455	0.0768796
Nipal2	409	1.1921e-11	7.86175e-11	0.20861	-0.156279	0.0337818
Neu2	256	1.38808e-11	9.13857e-11	-0.00279838	0.0308813	0.0595302
Ldlrad4	257	1.41052e-11	9.27048e-11	-0.0779943	0.0222906	0.147175
Ddx39b	410	1.55967e-11	1.02333e-10	0.194106	0.00953255	-0.324719
Mphosph8	257	1.59842e-11	1.04698e-10	0.140444	0.0971474	-0.0452542
Gm16286	413	1.90079e-11	1.24292e-10	0.224444	0.0583945	0.151617
Lao1	414	1.9168e-11	1.25127e-10	0.0975778	-0.0442184	-0.202479
Hist1h1c	122	1.94703e-11	1.26886e-10	-0.0948996	0.301803	0.364884
Mcee	159	2.02302e-11	1.31616e-10	0.0999616	0.163174	0.270689
Cdhr1	261	2.27076e-11	1.47484e-10	-0.0328197	-0.027384	0.0497992
Ifi35	415	2.31286e-11	1.49967e-10	0.164203	0.0126615	0.0619092
Slc38a3	313	2.32864e-11	1.50737e-10	0.11761	0.0257855	0.120663
Ceacam10	417	2.42431e-11	1.56667e-10	0.203155	-0.276901	-0.0291782
Egln3	156	2.55986e-11	1.65149e-10	0.228499	0.201195	0.341874
Atat1	276	2.84242e-11	1.83073e-10	0.160369	0.100901	0.132509
Plpp3	126	2.84984e-11	1.83245e-10	0.0367133	0.0914891	0.0424051
Pcmtd1	265	3.00025e-11	1.92595e-10	0.0307204	0.0720232	0.229543
Large2	421	3.23495e-11	2.07316e-10	0.102613	0.0367143	0.0178625
Sdc2	422	3.42041e-11	2.18838e-10	0.185953	0.0672706	0.0899214
Serinc2	423	3.43465e-11	2.19385e-10	0.176892	-0.152213	-0.0329279
Kif5c	266	3.59533e-11	2.29269e-10	0.0064829	0.0290885	0.0957973
C1rl	268	4.18868e-11	2.66666e-10	0.0639213	0.0329338	0.148883
Tk1	427	4.38513e-11	2.78713e-10	0.0556487	0.0252113	-0.638933
Csn1s2b	428	4.54462e-11	2.88374e-10	0.182879	-0.165807	-0.0737063
Rassf9	269	4.82094e-11	3.0503e-10	0.0268876	0.0408708	0.0785944
Lgals9	430	4.82292e-11	3.0503e-10	0.105458	0.00822362	0.0318639
Tkt	431	4.86234e-11	3.0702e-10	0.233682	0.0435148	-0.147382
Pdrg1	189	5.02972e-11	3.1707e-10	0.200321	0.144415	0.0542325
Hmgn5	434	5.75679e-11	3.62312e-10	0.155298	0.0357353	-0.379339
H2-Ke6	435	5.80162e-11	3.64539e-10	0.177805	0.0467609	0.124328
Cd55	352	6.08422e-11	3.81674e-10	0.166667	0.0101854	0.189948
Padi2	272	6.32265e-11	3.95987e-10	-0.00968396	-0.0407323	0.117734
Capg	437	6.7696e-11	4.23292e-10	0.232123	-0.163412	0.233685
Dynll2	199	7.40668e-11	4.62378e-10	0.227335	0.15887	-0.0989565
Zfp637	439	7.66125e-11	4.77498e-10	0.160269	-0.0260365	-0.0377126
Wdr45	273	7.92514e-11	4.93148e-10	-0.00756501	0.017643	0.146007
Fkbp3	440	8.16068e-11	5.06987e-10	0.198285	0.0149989	-0.33427
Txndc12	441	8.24421e-11	5.11353e-10	0.17449	-0.021738	0.0854399
Cradd	286	1.21725e-10	7.53798e-10	0.163324	0.0595388	0.216412
Frmpd1os	253	1.24915e-10	7.72309e-10	0.081561	0.0627926	0.0775091
Iqcc	277	1.3714e-10	8.46538e-10	0.0277725	0.0455626	0.126422
Sh3bp4	175	1.41421e-10	8.71569e-10	0.147036	0.113338	0.143799
Cttn	278	1.42659e-10	8.77795e-10	0.0831004	-0.0461189	0.229019
Hhipl2	281	1.52002e-10	9.33798e-10	0.00117566	-0.031484	0.220197
Lpp	447	1.54997e-10	9.5068e-10	0.163331	-0.0729763	0.0644213
Gm16025	282	1.61582e-10	9.895e-10	-0.0399058	0.0197296	0.0362539
Lefty1	171	1.62193e-10	9.91663e-10	0.0470486	0.0490396	0.0592518
Fry	190	1.63287e-10	9.96774e-10	0.125228	0.104048	0.165363
1110008L16Rik	448	1.68783e-10	1.02869e-09	0.137147	-0.0191864	-0.0544864
2010320M18Rik	143	1.89144e-10	1.15097e-09	0.133314	0.117529	0.148339
Hmgn2	451	2.08868e-10	1.26899e-09	0.149923	0.0134688	-0.838629
Pet100	453	2.35913e-10	1.43106e-09	0.172066	0.0304151	0.10826
Macrod1	291	2.37811e-10	1.4403e-09	-0.102302	-0.0198252	0.181018
Cyb5r2	325	2.47847e-10	1.49874e-09	0.105501	0.033006	0.132655
Dpm3	265	2.69202e-10	1.62533e-09	0.172009	0.120484	0.13861
Bax	459	2.86169e-10	1.72506e-09	0.170572	0.0169253	-0.263412
Pnrc1	295	2.99791e-10	1.80436e-09	-0.493077	-0.564283	0.354881
Ppargc1a	133	3.05179e-10	1.83392e-09	0.0403949	0.0579109	0.0293763
Rilpl2	134	3.08158e-10	1.84895e-09	0.0675571	0.130101	0.0963645
Plcxd2	296	3.11008e-10	1.86315e-09	0.0248731	0.0219358	0.0421659
Arid5a	299	3.37008e-10	2.01578e-09	-0.0107648	-0.113574	0.186701
AC168977.2	301	3.49996e-10	2.09023e-09	-0.0119157	0.00526582	0.0652726
Tuba1b	460	3.58989e-10	2.14062e-09	0.213676	-0.119019	-1.61506
Hrct1	136	3.77322e-10	2.24646e-09	0.103791	0.157859	0.151187
Abcf1	461	3.91562e-10	2.32765e-09	0.192857	-0.0173608	-0.0607817
Btg2	137	3.97793e-10	2.36106e-09	-0.176966	0.234602	0.276303
Ppt1	302	4.25517e-10	2.52173e-09	0.0670539	0.0547074	0.25139
Cmbl	303	4.3967e-10	2.6016e-09	0.0194735	0.00550994	0.0690643
Rbm47	304	4.61823e-10	2.72851e-09	-0.026546	-0.019485	0.193329
Tap1	463	4.68701e-10	2.76491e-09	0.105349	0.00997106	0.0466479
Papss1	215	5.3015e-10	3.12263e-09	0.217184	0.147629	0.221752
Nhp2	465	5.60543e-10	3.29661e-09	0.191416	-0.151485	-0.507544
Rexo2	264	5.62742e-10	3.3045e-09	0.117757	0.132651	0.284346
Zbp1	466	5.86325e-10	3.43775e-09	0.123346	-0.0398803	0.0827324
Xpa	309	6.24119e-10	3.6538e-09	0.00173719	0.0153534	0.124226
Hebp1	311	7.00095e-10	4.09237e-09	0.0556463	0.0529899	0.241363
Fam181b	140	7.24913e-10	4.23103e-09	0.0190313	0.0416515	0.0176028
Bcl2l14	314	7.7287e-10	4.50413e-09	0.169374	-0.564359	0.37863
Ddah2	315	7.87438e-10	4.57814e-09	-0.102298	-0.0447537	0.285956
Thap4	468	7.87944e-10	4.57814e-09	0.134354	0.0528624	-0.0118517
Eif4g3	470	8.02687e-10	4.65679e-09	0.161366	-0.00190822	0.148569
Cxcl12	316	8.48993e-10	4.91804e-09	-0.00675822	0.00128265	0.0958446
Mum1	144	8.90648e-10	5.15161e-09	0.0504514	0.0729736	-0.0424268
Cd59a	319	1.05809e-09	6.11095e-09	0.157519	-0.0390891	0.236676
St6galnac6	321	1.208e-09	6.96632e-09	0.1661	0.103813	0.265189
Wwc2	147	1.26755e-09	7.29882e-09	0.107321	0.139828	0.0334509
Il10rb	322	1.32302e-09	7.60686e-09	0.0274944	0.0475837	0.145915
Chrm3	473	1.3632e-09	7.82624e-09	0.145395	0.0627251	0.146553
Gdpd1	324	1.41107e-09	8.08903e-09	0.130615	-0.103184	0.195919
Ehd3	254	1.44928e-09	8.29575e-09	0.119487	0.085511	0.00884127
Ctxn1	477	1.68636e-09	9.63847e-09	0.0872024	-0.033393	-0.103204
Lad1	478	1.77798e-09	1.01471e-08	0.129187	-0.0728638	-0.16052
Fetub	480	1.86339e-09	1.06189e-08	0.0968768	0.00680982	-0.274429
Fitm2	225	1.9797e-09	1.1265e-08	0.104475	0.0842138	0.102335
Magix	328	2.09527e-09	1.19051e-08	-0.0214498	0.0256767	0.0467564
Plekho2	329	2.24811e-09	1.27547e-08	-0.0173575	-0.00871089	0.0632185
Itpr1	331	2.37732e-09	1.3468e-08	0.100098	0.0681978	0.160089
Elmo1	486	2.3855e-09	1.34945e-08	0.15457	0.0377511	0.108858
Mcm5	488	2.49608e-09	1.40994e-08	0.0372857	-0.00301814	-0.371516
Col9a2	489	2.56364e-09	1.44598e-08	0.187531	-0.0993907	0.0924423
Spop	332	2.66199e-09	1.49926e-08	0.053293	0.0486771	0.178816
Gle1	308	2.73136e-09	1.53609e-08	0.153441	0.10107	0.0742427
Csprs	333	2.82805e-09	1.58815e-08	-0.0369419	0.0269626	0.0659215
Trib3	358	3.24482e-09	1.81955e-08	0.128255	0.0795389	0.111927
Mup6	335	3.34103e-09	1.87079e-08	0.0332858	0.0523584	0.10473
Rgcc	155	3.35899e-09	1.87811e-08	0.0296542	0.103313	0.0392187
Tmem82	363	3.50023e-09	1.95425e-08	0.0782273	0.0500471	0.00469168
Ttll10	336	3.59367e-09	2.00352e-08	-0.00200507	-0.00192038	0.0368219
Scara5	337	3.66305e-09	2.03926e-08	0.075703	0.0258677	0.14099
Extl1	339	3.79769e-09	2.11116e-08	0.0381929	-0.0216456	0.0960225
Tmem123	340	3.89498e-09	2.16213e-08	0.106605	-0.0200194	0.211837
Tyms	496	3.90938e-09	2.16701e-08	0.0834825	-0.00229581	-0.871593
Sh3yl1	361	4.001e-09	2.21461e-08	0.126058	0.0459349	0.161402
Tnk2	158	4.26356e-09	2.35657e-08	0.168676	0.163518	0.0899276
Timp2	341	4.30777e-09	2.37759e-08	-0.0571502	-0.0609837	0.12384
Tspan2	498	4.94898e-09	2.72759e-08	0.129662	-0.0414185	0.0737046
Syne4	342	5.01379e-09	2.75937e-08	0.155942	-0.00217318	0.225635
Casp4	343	5.28213e-09	2.90291e-08	-0.0503644	-0.118187	0.186787
Cd99l2	499	5.31326e-09	2.91587e-08	0.164869	-0.000242307	0.124604
Mmgt2	344	5.38844e-09	2.95292e-08	0.0544284	0.0625736	0.130578
Dixdc1	181	5.40067e-09	2.95468e-08	0.0501389	0.0755922	0.107299
Ttc39a	346	5.40696e-09	2.95468e-08	0.0976406	-0.0132068	0.172849
Paqr6	347	5.7116e-09	3.11674e-08	0.0437062	0.0468498	0.19798
Wipi1	501	6.85965e-09	3.73793e-08	0.137012	-0.0669514	-0.033332
Gm13056	348	6.91564e-09	3.76312e-08	0.0985533	-0.00760262	0.148615
Mcfd2	349	7.12934e-09	3.87394e-08	0.120155	-0.0151479	0.239931
March8	350	7.18594e-09	3.89921e-08	0.0396356	0.000763263	0.111394
Irx2	163	7.59219e-09	4.11386e-08	0.12428	0.163524	0.227018
Diaph2	351	7.61899e-09	4.12259e-08	-0.00696051	0.00245876	0.0779264
Slc5a3	165	8.44874e-09	4.56516e-08	0.0799506	0.112828	-0.0504654
Dnase2a	166	9.80237e-09	5.28917e-08	0.0552093	0.116262	0.0846872
2310030G06Rik	167	1.06425e-08	5.73448e-08	0.0791853	0.0878795	0.0509425
Mafb	168	1.21444e-08	6.53462e-08	0.0132289	0.109474	0.0766328
Scnn1b	356	1.24564e-08	6.69312e-08	0.0298127	0.0223443	0.0869011
Oxct1	503	1.35258e-08	7.25763e-08	0.185831	0.0299769	-0.128161
Ltbp2	357	1.36324e-08	7.30471e-08	0.151673	-0.120393	0.20703
Tmprss13	358	1.43585e-08	7.68307e-08	-0.0249864	-0.0429108	0.105451
Tmsb10	504	1.44926e-08	7.74409e-08	0.23555	-0.437351	-0.570039
Cebpa	360	1.51197e-08	8.06803e-08	0.00914159	0.0196192	0.0524807
Dnajc1	505	1.68249e-08	8.96555e-08	0.154293	-0.000186937	-0.0302759
Dut	449	1.69264e-08	9.00719e-08	0.111534	0.0561598	-0.76309
Guca1a	362	1.72812e-08	9.18333e-08	0.0755439	0.0178872	0.145242
Ube2f	363	1.73191e-08	9.19078e-08	-0.00156641	-0.218125	0.22592
2310033P09Rik	174	1.74958e-08	9.27181e-08	0.0653432	0.104271	-0.00369878
AI413582	176	1.85015e-08	9.79131e-08	-0.00308287	0.123349	0.087655
Pcgf1	177	1.85436e-08	9.80015e-08	0.0345631	0.0546608	0.0355309
Slc7a4	388	1.86737e-08	9.85543e-08	0.0972755	0.0580565	0.120121
Kxd1	365	1.88942e-08	9.95816e-08	0.00120698	0.00328032	0.198766
Zfp688	179	1.90946e-08	1.00501e-07	0.0499115	0.0656776	-0.0108431
Trim2	310	1.9398e-08	1.0182e-07	0.126423	0.0882289	0.148488
0610040J01Rik	511	1.93873e-08	1.0182e-07	0.0993788	0.0201746	-0.0313629
Lcp1	513	2.00174e-08	1.04928e-07	0.144254	-0.0414263	0.0384933
Cox7a1	366	2.03944e-08	1.06759e-07	0.0949462	0.0340826	0.165256
Apobec3	180	2.06527e-08	1.07965e-07	0.0586175	0.0830934	0.0356598
Lrrc75b	368	2.14825e-08	1.12151e-07	0.0286739	0.0296817	0.0683311
Tead2	369	2.26613e-08	1.18145e-07	-0.0126443	0.0581651	0.207803
Pim3	182	2.37272e-08	1.23535e-07	0.00794315	0.0874961	0.0448274
Bloc1s1	372	2.42178e-08	1.25919e-07	0.0799641	-0.0237391	0.161971
Pnpo	373	2.44882e-08	1.27154e-07	0.0313889	0.0277048	0.128306
Cyp24a1	374	2.46326e-08	1.27732e-07	-0.0193169	-0.0760589	0.108777
Phactr1	516	2.49023e-08	1.28957e-07	0.107831	-0.105108	-0.162562
Tob1	183	2.52049e-08	1.30349e-07	0.0183825	0.0994775	-0.0666902
Junb	375	2.60248e-08	1.34409e-07	-0.482674	-0.190635	0.426233
A530010L16Rik	376	2.62861e-08	1.35577e-07	-0.00394057	0.0238327	0.0582258
Rpa2	518	2.69118e-08	1.38619e-07	0.0841062	0.0212146	-0.361001
Tns2	348	2.70084e-08	1.38931e-07	0.0140357	0.044662	0.0681516
Mllt3	184	2.73637e-08	1.40571e-07	0.0208481	0.117537	0.118907
Itgb3	197	2.95193e-08	1.51444e-07	0.078068	0.0754769	0.067342
Irs1	186	2.96283e-08	1.51801e-07	0.0621559	0.0716264	0.0507572
Josd2	521	2.99455e-08	1.53223e-07	0.161013	0.026587	0.022468
Timd2	383	3.31791e-08	1.69543e-07	0.0930887	0.0360811	0.120324
Adrm1	522	3.34172e-08	1.70534e-07	0.158416	-0.004627	-0.14896
Adamtsl2	386	3.97686e-08	2.02678e-07	-0.0543385	-0.0072828	0.0254617
Gm45589	460	4.06638e-08	2.06967e-07	0.124876	0.0436827	0.146401
Gpr146	387	4.4703e-08	2.27226e-07	0.0542599	0.00689768	0.0999378
Zfp651	388	4.56785e-08	2.31878e-07	-2.42748e-05	0.0200699	0.0348622
Slc44a2	279	4.71421e-08	2.38993e-07	0.0641022	0.0699465	0.113342
Pfkl	194	5.01799e-08	2.54061e-07	0.103646	0.170621	0.256011
Slc7a5	525	5.63872e-08	2.85114e-07	0.116937	-0.028568	0.0372166
H2-Q7	526	5.80486e-08	2.9313e-07	0.173705	-0.00609139	-0.136327
Ociad2	195	6.46101e-08	3.25838e-07	0.131366	0.146624	0.238009
Dnajb9	392	6.62153e-08	3.33319e-07	0.0464345	0.0237278	0.197596
Nfix	393	6.62663e-08	3.33319e-07	0.158399	0.0810169	0.243482
Bet1l	394	6.64326e-08	3.3366e-07	0.103971	0.0112125	0.187293
Mr1	395	6.65071e-08	3.3366e-07	0.0268658	0.021059	0.108938
Lpcat2	529	6.73362e-08	3.37381e-07	0.090284	0.0299104	-0.081966
Spa17	396	6.75545e-08	3.38035e-07	0.0531854	0.0462242	0.0976745
Anapc5	530	6.81174e-08	3.40411e-07	0.15518	-0.0902983	-0.424847
Hist1h4h	397	7.25805e-08	3.62245e-07	-0.0301727	0.0198728	0.117691
Tmprss11a	399	7.85097e-08	3.91331e-07	0.0205315	-0.0113049	0.0456031
Pdk2	200	8.42144e-08	4.19225e-07	0.0439986	0.106269	0.118705
Csdc2	402	8.90793e-08	4.42871e-07	-0.020643	0.0076094	0.0867019
Tbrg1	532	9.8412e-08	4.8864e-07	0.15224	-0.101745	0.0376907
Cebpb	403	1.13014e-07	5.60423e-07	-0.303107	-0.137146	0.29009
Gm17619	404	1.14743e-07	5.68266e-07	0.0565722	0.0257924	0.120627
Kifc3	205	1.22503e-07	6.05918e-07	0.096421	0.100782	0.0681359
Rfc1	241	1.27568e-07	6.30161e-07	0.121185	0.101516	-0.182451
Dynlt1f	534	1.2819e-07	6.32427e-07	0.0968604	0.0132138	-0.595974
Pnisr	406	1.30266e-07	6.41847e-07	-0.0441572	0.07229	0.20457
Mpzl1	407	1.33982e-07	6.59316e-07	0.0863491	-0.00686609	0.18505
Tmem160	535	1.37326e-07	6.74911e-07	0.157386	0.00162015	0.0796968
Tprgl	408	1.41003e-07	6.92097e-07	0.0674363	-0.0631231	0.201774
Ar	410	1.4186e-07	6.95419e-07	0.00272802	-0.00554179	0.0808368
Prpf40a	536	1.57387e-07	7.70558e-07	0.155622	0.00139397	-0.266928
Lppos	412	1.71513e-07	8.38654e-07	0.0976601	0.0564936	0.156221
Tmem140	413	1.72954e-07	8.44628e-07	0.0131657	0.0179405	0.0586968
Snrpg	537	1.73984e-07	8.48585e-07	0.156684	-0.0259856	-0.52443
Limd1	538	1.75932e-07	8.57001e-07	0.112076	0.0484049	0.0787846
Rtn1	539	1.77401e-07	8.63066e-07	0.116394	0.00775464	-0.05027
Sort1	414	1.89701e-07	9.21747e-07	0.0523446	-0.0121008	0.158196
Fgfr1	415	1.92598e-07	9.34643e-07	0.00735745	0.0141967	0.171945
Amer1	208	1.94394e-07	9.42178e-07	0.0394038	0.0634042	0.0380039
Fbxo9	209	1.99734e-07	9.66845e-07	0.0975853	0.0987062	0.111969
Ncdn	416	2.03526e-07	9.83965e-07	0.0144576	-0.025529	0.0794521
Ldha	210	2.09731e-07	1.01269e-06	0.0872251	0.173469	0.209332
Tubb5	542	2.18139e-07	1.05198e-06	0.16638	-0.25706	-1.50367
Gna14	417	2.29132e-07	1.10361e-06	0.00420242	-0.059939	0.124421
Lifr	418	2.52967e-07	1.21689e-06	-0.00976846	0.0169361	0.0599708
Gm16206	407	2.62901e-07	1.26311e-06	0.0535067	0.0374296	-0.00313261
Sec14l1	544	2.6534e-07	1.27324e-06	0.139061	0.0514659	0.0743434
Sectm1a	419	2.87225e-07	1.37654e-06	-0.00533132	-0.041999	0.0611592
Sirt3	217	3.00017e-07	1.43606e-06	0.0739613	0.109472	0.100876
Tmem79	546	3.12763e-07	1.49521e-06	0.121395	0.0139801	0.012794
Psmb10	548	3.17719e-07	1.51703e-06	0.114241	-0.0235502	0.070463
Arg2	423	3.20503e-07	1.52843e-06	0.017454	0.021297	0.0856815
Rtp4	424	3.27516e-07	1.55995e-06	0.128975	-0.031157	0.136582
Hnrnpm	549	3.29328e-07	1.56664e-06	0.119685	-0.023294	-0.324546
Nucks1	550	3.33378e-07	1.58396e-06	0.152367	0.0584203	-0.757799
Ggt6	425	3.34855e-07	1.58762e-06	-0.00210642	0.0133444	0.034722
Sorl1	426	3.34973e-07	1.58762e-06	0.0365011	0.0445847	0.15556
Tk2	427	3.36474e-07	1.59278e-06	0.00662226	0.0307834	0.0761814
Dst	552	3.5093e-07	1.65917e-06	0.167733	-0.215634	0.0776438
Myl12a	553	3.55077e-07	1.67673e-06	0.193447	-0.330533	-0.0329221
Hacd1	554	3.56407e-07	1.68095e-06	0.0752666	-0.0287137	-0.245224
Cd200	428	3.67569e-07	1.73148e-06	0.0131978	-0.236992	0.20571
D030025P21Rik	221	3.68622e-07	1.73432e-06	0.0258723	0.0408988	0.00940996
Gns	429	3.85363e-07	1.81088e-06	-0.0778776	-0.0339925	0.124758
C2cd4d	223	4.03114e-07	1.89199e-06	0.00983023	0.0256626	0.00600608
Klhdc1	431	4.24715e-07	1.99095e-06	-0.033679	0.0349356	0.119737
Oas1a	555	4.39277e-07	2.05671e-06	0.064353	-0.0242831	0.0247665
Fam46c	227	4.64256e-07	2.17103e-06	0.0396109	0.0470902	0.0583976
Mthfd2l	434	4.70488e-07	2.19751e-06	0.127536	0.033669	0.168709
Enpp3	556	4.81083e-07	2.24428e-06	0.126	0.018094	0.113252
Kdelr2	557	4.89987e-07	2.28306e-06	0.142155	-0.0238491	-0.186477
Slc46a1	346	4.96527e-07	2.31074e-06	0.0243809	0.0509037	0.0936183
Mmp15	558	5.12725e-07	2.38325e-06	0.106884	-0.0328025	0.0739584
Tsc22d2	230	5.18671e-07	2.40798e-06	-0.0172075	0.119061	0.0471563
Traf4	559	5.49084e-07	2.54611e-06	0.122419	0.012064	-0.103289
Chrac1	367	5.60692e-07	2.59682e-06	0.12799	0.0833602	-0.0772419
Klf2	231	5.66196e-07	2.61916e-06	-0.0176734	0.0770971	0.0239856
Tgfa	561	5.69558e-07	2.63156e-06	0.0713163	-0.0495562	-0.0916465
Cmtm6	562	5.74109e-07	2.64942e-06	0.123142	-0.0634078	0.0793212
Fxyd5	563	5.78649e-07	2.66718e-06	0.0653491	-0.0504295	-0.0489498
Cd63	438	5.9396e-07	2.73448e-06	-0.417544	-0.281494	0.309069
Agtrap	439	6.08892e-07	2.79989e-06	0.0187028	0.0292387	0.0895072
Fam214a	440	6.17329e-07	2.83531e-06	0.0011377	-0.0457325	0.0869348
Adra2c	237	6.34137e-07	2.90904e-06	0.0395393	0.0367172	0.00978416
Ctsl	442	6.44882e-07	2.95481e-06	-0.614888	-0.229696	0.287225
Slc9a1	444	7.0115e-07	3.20882e-06	0.0425384	0.0423941	0.0874851
Slc28a3	567	8.0852e-07	3.69582e-06	0.1101	0.029486	-0.0191901
Srsf6	568	8.5149e-07	3.88763e-06	0.165962	0.0446654	-0.339285
St8sia5	482	8.86649e-07	4.04337e-06	0.0557128	0.030365	0.0424113
Neu1	446	9.21429e-07	4.19702e-06	0.0480317	-0.0364286	0.171966
Alkbh2	236	9.35389e-07	4.25558e-06	0.0578273	0.0638923	0.0157401
Vsir	447	9.37958e-07	4.26224e-06	-0.035333	0.0199753	0.0449151
Ccdc34	572	9.53852e-07	4.32937e-06	0.111521	0.0475926	-0.990446
Vdr	448	9.57324e-07	4.34002e-06	-0.0268245	-0.189763	0.0841937
Mtdh	573	9.60928e-07	4.35124e-06	0.156127	0.00189478	-0.224353
Itga8	574	9.80416e-07	4.43428e-06	0.08593	-0.0641032	0.0197038
Msmo1	238	1.01467e-06	4.58382e-06	0.0649027	0.0649522	-0.00626457
Rad51d	239	1.03586e-06	4.6741e-06	0.0638125	0.0734377	0.0382165
Lmo7	240	1.04737e-06	4.7205e-06	0.0612534	0.0774418	0.0926702
Tmem218	576	1.11397e-06	5.01167e-06	0.109284	0.0389601	0.0825285
H2afz	577	1.11522e-06	5.01167e-06	0.181711	-0.0221925	-2.01548
Slc15a2	578	1.11587e-06	5.01167e-06	0.119282	-0.0475662	0.00181997
Hs3st6	390	1.13136e-06	5.07531e-06	0.00178893	0.0256798	0.0342463
Tmub2	452	1.16956e-06	5.24059e-06	0.0724331	0.0500934	0.133362
Rfc2	580	1.17137e-06	5.24264e-06	0.090716	0.0186562	-0.488646
Slc16a2	453	1.19233e-06	5.33024e-06	-0.170613	-0.074371	0.118608
5930430L01Rik	242	1.24048e-06	5.53908e-06	0.0301138	0.0595006	0.0657966
Slfn2	456	1.33214e-06	5.9415e-06	0.00959942	-0.103138	0.0840357
Cdkn1c	457	1.36155e-06	6.06565e-06	0.0332317	-0.0214927	0.153632
Gm44386	459	1.40884e-06	6.2691e-06	-0.0194999	0.0204925	0.0633314
Echs1	244	1.48533e-06	6.60184e-06	0.121444	0.13561	0.0791643
Fbxo31	245	1.49791e-06	6.6501e-06	-0.00178367	0.0616886	0.0765708
Tlcd1	246	1.50001e-06	6.65178e-06	0.0327454	0.0823145	0.0173397
Tipin	411	1.52546e-06	6.75684e-06	0.0632645	0.0410949	-0.346724
Cox8b	461	1.53156e-06	6.77609e-06	-0.115849	0.00259493	0.0613847
Errfi1	462	1.54874e-06	6.84426e-06	-0.374873	-0.684224	0.264686
Nipal3	463	1.66307e-06	7.33545e-06	0.036165	0.0331083	0.0807765
Cirbp	464	1.66369e-06	7.33545e-06	-0.125736	0.000683536	0.176578
Car12	249	1.72768e-06	7.60887e-06	-0.0263001	0.125647	0.181536
Epb41l4b	465	1.76631e-06	7.77017e-06	-0.0405587	-0.0381889	0.111835
Atp6v1b1	294	1.80536e-06	7.93289e-06	-0.0987232	0.105534	0.162733
Amt	529	1.83966e-06	8.0744e-06	0.0517367	0.032557	0.0194237
Gm32036	470	1.92091e-06	8.42146e-06	0.0507916	0.0137098	0.0943489
Insig1	417	2.02437e-06	8.86496e-06	0.0900886	0.0601558	-0.0260075
Muc20	472	2.36229e-06	1.0333e-05	0.0304201	-0.0392603	0.074183
Jak1	474	2.39134e-06	1.04482e-05	-0.0862413	-0.166166	0.175261
Tor3a	476	2.56157e-06	1.11793e-05	0.0361979	0.0206276	0.0576428
Smim4	260	2.6867e-06	1.17122e-05	0.039114	0.0759821	0.0122119
Iqgap2	588	2.79745e-06	1.21812e-05	0.12042	0.055346	0.0551646
Erlec1	589	2.85968e-06	1.24382e-05	0.134913	-0.0176146	0.131509
Vipr1	477	2.87742e-06	1.25012e-05	0.0289594	0.0477359	0.108904
Npy	478	2.90507e-06	1.26072e-05	0.280734	-0.0717899	0.484477
Nktr	479	2.91811e-06	1.26495e-05	0.0470102	-0.0030943	0.189117
Wap	590	2.94534e-06	1.27532e-05	0.0518271	-0.0300801	0.0285771
Sec61a1	591	3.09873e-06	1.34024e-05	0.126846	-0.121835	0.0118765
Dapk1	481	3.21124e-06	1.38734e-05	0.0214898	0.0257848	0.095808
Malat1	482	3.24215e-06	1.39913e-05	-1.04129	-0.402752	0.423732
Rfc5	593	3.34377e-06	1.44137e-05	0.0595263	0.00697916	-0.400417
Nsmaf	484	3.39116e-06	1.46017e-05	-0.00351126	0.00951159	0.0379248
Ier3	485	3.62117e-06	1.55746e-05	-0.160744	-0.620418	0.364826
Gas1	263	3.66757e-06	1.57567e-05	0.0233434	0.0378654	-0.00371971
Gstt2	518	3.68557e-06	1.58164e-05	0.0963373	0.0545107	-0.0178145
Gna15	486	3.69315e-06	1.58313e-05	0.0122903	0.0176647	0.0502519
Bhlhe41	487	3.96846e-06	1.69926e-05	-0.0262747	-0.0125818	0.021
App	489	4.08912e-06	1.74898e-05	-0.0964197	-0.231561	0.225841
Sash1	491	4.44583e-06	1.89945e-05	-0.108272	0.0131167	0.127571
Pbxip1	492	4.48843e-06	1.91553e-05	-0.0622154	-0.0261371	0.211489
Limd2	601	4.49608e-06	1.91667e-05	0.129994	0.0173617	-0.0453806
Ctsf	493	4.5229e-06	1.92387e-05	-0.0497306	-0.0123278	0.0798007
5830454E08Rik	494	4.52294e-06	1.92387e-05	-0.00291357	0.0112504	0.0312759
Cp	496	4.71719e-06	2.00429e-05	-0.00818113	-0.560845	0.224316
B4gat1	300	4.94038e-06	2.09681e-05	0.0815748	0.0700308	0.0447955
Camk2n1	497	5.03177e-06	2.13325e-05	-0.153421	-0.0164077	0.0957035
Snhg11	498	5.06011e-06	2.14291e-05	-0.000361195	0.0125027	0.0310668
Cyth1	604	5.15028e-06	2.1787e-05	0.0671354	0.0197513	0.0387816
Ikzf4	500	5.42502e-06	2.29241e-05	-0.0224075	-0.058861	0.0405429
Amhr2	269	5.49475e-06	2.31934e-05	0.034905	0.0703445	0.0614151
Ccpg1	502	5.69197e-06	2.39996e-05	-0.0609736	-0.0327016	0.110064
Entpd1	503	5.78961e-06	2.43846e-05	0.0454293	-0.000840768	0.0825407
Taf3	271	5.8422e-06	2.45793e-05	0.00238904	0.0624607	-0.0719341
Ripk2	272	5.8705e-06	2.46714e-05	0.0487844	0.0553104	0.0368256
Card14	506	6.08112e-06	2.55288e-05	-0.0315775	-0.0340214	0.0321276
Proser1	275	6.28982e-06	2.63762e-05	0.0872768	0.0774734	0.0593515
Fn3k	299	6.39437e-06	2.67856e-05	0.00154038	0.0568654	0.084939
Fcgbp	509	6.96148e-06	2.91295e-05	-0.0340856	-0.00120738	0.0247027
H2-T22	608	8.00495e-06	3.34595e-05	0.110368	0.0407755	0.0679365
Tfrc	399	8.03158e-06	3.35344e-05	0.0640692	0.0444809	-0.0220766
Bcas2	297	8.11092e-06	3.38291e-05	0.146962	0.123069	-0.100584
Tgfb2	510	8.29093e-06	3.45426e-05	0.0581856	0.0120897	0.11387
6330418K02Rik	281	8.44689e-06	3.51544e-05	0.0288157	0.0384653	0.0311994
Acot2	282	8.51507e-06	3.5395e-05	0.0141492	0.0321028	0.0177033
Mcm6	610	8.52305e-06	3.5395e-05	0.0433692	0.00499784	-0.455003
Mcm3	611	8.72612e-06	3.61993e-05	0.0324224	0.00528991	-0.296456
Atp9a	612	8.87296e-06	3.67689e-05	0.113845	-0.0663685	-0.0669923
Sec63	613	8.89507e-06	3.6821e-05	0.111406	-0.0360769	0.0571359
Osbpl5	513	9.00203e-06	3.7184e-05	0.013606	0.0105535	0.0463603
Unc119	614	8.99669e-06	3.7184e-05	0.0973457	0.00934644	0.0912452
Ttc28	514	9.02454e-06	3.72371e-05	-0.0379239	0.0141509	0.032653
Lipa	515	9.08674e-06	3.74537e-05	0.0216828	0.00751535	0.0681227
Gm26881	516	9.21568e-06	3.79446e-05	0.0146119	0.00368151	0.0357528
Uba7	517	9.2328e-06	3.79746e-05	-0.00283936	0.00124778	0.0283273
D7Ertd443e	518	9.60285e-06	3.94545e-05	-0.000302357	-0.0238439	0.0594081
Tmem14a	615	9.62509e-06	3.95038e-05	0.067385	0.0221202	0.0424195
Osbpl7	284	9.73798e-06	3.99247e-05	0.0391353	0.0522389	-0.0230501
Atraid	303	9.75443e-06	3.99497e-05	0.139215	0.121572	0.129473
Krt23	285	1.01966e-05	4.17163e-05	0.0197596	0.0748391	0.055617
Slc39a14	519	1.03713e-05	4.23862e-05	-0.0552655	-0.108127	0.105754
Telo2	286	1.04901e-05	4.28263e-05	0.0331999	0.0512583	0.00460009
E2f1	618	1.06458e-05	4.34161e-05	0.0209758	0.00519966	-0.28205
Hells	619	1.08947e-05	4.43841e-05	0.0292493	0.00425172	-0.329142
Dhodh	410	1.12906e-05	4.59486e-05	0.0649587	0.0482766	0.0665604
Rbpms	520	1.20093e-05	4.88216e-05	-0.0911772	-0.17898	0.171706
Gm43672	521	1.21575e-05	4.93723e-05	-0.0149644	-0.00851632	0.0375981
Slc34a2	289	1.23238e-05	4.99948e-05	0.0235213	0.0348335	0.0252407
Cacybp	621	1.25929e-05	5.10331e-05	0.117583	0.0278945	-0.313796
2310001H17Rik	523	1.29514e-05	5.24309e-05	0.0100126	0.0202088	0.0838143
Eif4b	525	1.36417e-05	5.51674e-05	-0.0655868	-0.035629	0.191065
Tbc1d17	526	1.37482e-05	5.55397e-05	0.00500274	0.0343138	0.103903
Wdr72	527	1.38256e-05	5.57941e-05	0.000265952	-0.00532548	0.0458991
Tspan7	528	1.39129e-05	5.60876e-05	0.0838413	0.00296319	0.143087
Eps8l2	529	1.40448e-05	5.65602e-05	0.0246273	0.0157255	0.148422
Tspan17	530	1.42514e-05	5.73325e-05	0.0248163	-0.0342323	0.0914618
Pot1a	295	1.4477e-05	5.81189e-05	0.00685019	0.0360344	0.00840433
Rnf122	532	1.44726e-05	5.81189e-05	-0.0346167	-0.0784725	0.119013
Clcn3	533	1.45656e-05	5.84138e-05	-0.00582233	0.0417335	0.169288
Arrdc4	535	1.47792e-05	5.92087e-05	-0.34281	-0.498796	0.213699
Zbtb20	536	1.50385e-05	6.0185e-05	-0.114463	-0.0798243	0.180938
Chst10	296	1.52315e-05	6.08944e-05	0.016708	0.0279183	0.0235259
Gm10642	537	1.52889e-05	6.10606e-05	0.0158852	0.0113813	0.0330678
1300017J02Rik	625	1.56547e-05	6.24571e-05	0.0463984	-0.00150859	0.0411793
F3	538	1.59193e-05	6.34469e-05	-0.0477165	-0.274349	0.185397
Tpm1	539	1.6215e-05	6.4559e-05	0.0977595	-0.216056	0.184291
Ankrd12	540	1.64752e-05	6.55272e-05	0.00966638	-0.00350413	0.159843
Noxo1	626	1.65397e-05	6.57158e-05	0.0920244	0.034826	0.0937103
Ly6d	541	1.69012e-05	6.70832e-05	-0.344357	-0.0060486	0.0802116
Pgrmc1	500	1.71639e-05	6.80559e-05	-0.0280195	0.0782431	0.166702
Erbb2	543	1.79031e-05	7.09138e-05	0.0284176	0.0240135	0.096656
Nfia	475	1.84631e-05	7.30572e-05	0.0992681	0.0625244	0.12509
Tgoln1	548	1.971e-05	7.79112e-05	-0.0585042	-0.10043	0.149477
Snrpa1	629	2.02903e-05	8.01228e-05	0.102418	0.000548335	-0.273514
Gm13596	620	2.03874e-05	8.0424e-05	0.0319838	0.0181844	0.00773467
Ugp2	631	2.05832e-05	8.11132e-05	0.106278	-0.0318248	-0.112102
Apol9a	630	2.09248e-05	8.23754e-05	0.0802201	0.0393797	0.0637677
Gjb1	634	2.12722e-05	8.36575e-05	0.0620136	0.032702	0.0648541
Ier2	305	2.13445e-05	8.38566e-05	0.0966045	0.160957	-0.0266424
1810030O07Rik	307	2.1843e-05	8.57277e-05	0.026902	0.0544923	0.0467853
Tmbim1	552	2.19486e-05	8.60544e-05	-0.119968	-0.123025	0.15498
Snhg18	635	2.23618e-05	8.75856e-05	0.110525	-0.00898663	0.050992
Bid	636	2.26857e-05	8.87642e-05	0.0610723	-0.0250694	-0.0578145
Gas6	554	2.28253e-05	8.92199e-05	-0.143785	-0.0282826	0.0652566
Pcdhb14	555	2.3121e-05	9.02844e-05	0.0172092	0.0108611	0.0285394
Pcsk1n	556	2.31584e-05	9.03388e-05	0.00359298	0.0107253	0.0267684
C130026I21Rik	557	2.34331e-05	9.13182e-05	0.02234	0.0143064	0.0481882
Kctd13	314	2.37142e-05	9.23203e-05	-0.00261841	0.0356766	0.0434823
Oxa1l	568	2.39227e-05	9.3038e-05	0.119796	0.0652355	0.156448
Crispld2	560	2.50866e-05	9.74664e-05	0.0182244	-0.228736	0.18712
Pex11a	309	2.57214e-05	9.98322e-05	0.0116372	0.0607302	0.077293
Ypel2	561	2.66017e-05	0.000103145	0.0121291	-0.00400328	0.0315182
Nbeal1	562	2.80887e-05	0.000108802	-0.043592	-0.0228399	0.0749836
Ak2	640	2.83163e-05	0.000109573	0.130777	-0.160808	-0.31462
Rtl5	311	2.8395e-05	0.000109768	0.0236897	0.0404706	0.0420924
Ndufaf2	641	2.89517e-05	0.000111808	0.0830587	0.0339386	-0.413127
Gcfc2	312	3.05137e-05	0.000117722	0.0214529	0.0265436	0.0102427
Pgpep1	643	3.06387e-05	0.000118086	0.0812618	-0.00992318	0.0909573
Zmiz1	384	3.06708e-05	0.000118092	0.0517949	0.0759802	0.13664
Gcat	365	3.1093e-05	0.000119598	0.0722366	0.0641537	-0.0552946
Tapbp	568	3.19124e-05	0.000122628	0.0599989	-0.0898492	0.159175
Trnau1ap	547	3.28727e-05	0.000126192	0.103909	0.0585974	0.0879885
Mvp	569	3.29556e-05	0.000126385	-0.104896	-0.121362	0.101447
Ids	570	3.36403e-05	0.000128882	0.000703187	0.00955427	0.0481118
Hivep3	571	3.38238e-05	0.000129457	-0.106863	-0.0550059	0.10324
Dazap1	647	3.39619e-05	0.000129856	0.094006	-0.0531721	-0.295658
Atp6ap2	573	3.60648e-05	0.00013776	-0.00465538	-0.0655836	0.163705
Lyar	649	3.61539e-05	0.000137964	0.10435	-0.0809498	-0.508248
B4galt1	574	3.6207e-05	0.00013803	0.0368811	-0.0409594	0.141006
Csrp2	650	3.657e-05	0.000139276	0.081941	0.0194196	-0.163108
Scube1	575	3.68648e-05	0.000140261	-0.0281152	-0.00569534	0.0302359
Gm48435	354	3.87276e-05	0.000147203	0.038455	0.0416585	0.0554192
Irf7	577	3.95517e-05	0.000150187	0.0194114	-0.000242794	0.110595
Kit	652	3.99976e-05	0.000151731	0.0979195	0.00777604	0.0421687
Sac3d1	653	4.02798e-05	0.000152652	0.0778166	0.0106372	-0.0723722
Kctd1	616	4.07072e-05	0.00015412	0.0968594	-0.359167	0.175928
Tcp11l2	581	4.30104e-05	0.000162681	-0.0351155	-0.0459452	0.0944438
Prnp	621	4.34695e-05	0.000164256	0.106471	-0.0497201	0.138432
Sap30	368	4.36059e-05	0.000164532	0.0523996	0.0390966	0.00428064
Eif3e	656	4.36279e-05	0.000164532	0.147869	-0.137105	0.0285796
Trip6	657	4.40033e-05	0.000165786	0.108518	0.0110696	-0.0358007
A530020G20Rik	377	4.43719e-05	0.000167011	0.0074351	0.0343415	0.0507052
mt-Nd5	315	4.451e-05	0.000167368	-0.0794789	0.133646	-0.00479232
Zfp521	584	4.53954e-05	0.000170531	-0.0113561	0.00521111	0.018014
Galnt18	589	4.55234e-05	0.000170845	0.0552401	0.02666	0.0708682
Plekhn1	585	4.5934e-05	0.000172219	-0.0177715	0.00158363	0.0625624
1810064F22Rik	556	4.75663e-05	0.000178166	0.00679825	0.014522	0.0227391
Plekhs1	591	4.92778e-05	0.000184397	-0.0457079	-0.0953373	0.0480897
Bik	592	4.98545e-05	0.000186375	-0.0903683	0.0136384	0.097816
Ngef	593	5.12905e-05	0.000191417	-0.0166809	0.00338403	0.0334883
Igf2r	659	5.13024e-05	0.000191417	0.0832698	-0.0441896	-0.0115598
Gm12454	594	5.28942e-05	0.000196871	0.0326843	0.00787818	0.0477508
Ophn1	595	5.29173e-05	0.000196871	0.00120438	0.0196815	0.0780081
Ppp1r14b	661	5.28948e-05	0.000196871	0.111599	-0.127967	-0.296778
Naga	597	5.42837e-05	0.00020176	0.0298521	0.0122825	0.101156
Ten1	662	5.54646e-05	0.00020595	0.109343	0.00714269	0.120082
Cald1	663	5.58355e-05	0.000207128	0.15126	0.011058	0.168354
Syf2	598	5.79442e-05	0.000214744	-0.00602411	0.0374992	0.128371
Polr3gl	404	5.96784e-05	0.000220959	0.0525446	0.0575143	0.0966577
Pkig	434	6.05601e-05	0.000224009	0.128621	0.0860494	-0.030982
Lgals1	665	6.19503e-05	0.000228931	0.113754	-0.060025	0.0333426
AA986860	600	6.21766e-05	0.000229548	0.00528447	-0.080108	0.0448781
Gm20234	601	6.2943e-05	0.000232155	0.00900053	-0.00165629	0.020597
Porcn	602	6.39944e-05	0.000235808	-0.000731081	0.00607506	0.0307768
Spc24	667	6.60647e-05	0.000243204	0.0302019	-0.00925534	-0.682358
Ggt1	605	6.66624e-05	0.00024498	-0.00336335	0.0106032	0.0491661
Sel1l3	606	6.66742e-05	0.00024498	0.00260352	0.00749568	0.0145515
Pdzrn3	668	6.79945e-05	0.000249594	0.0737712	-0.0146411	0.0330973
Ankrd13d	599	6.81465e-05	0.000249914	0.0173242	0.0136596	0.0246165
Cir1	320	6.94791e-05	0.000254559	0.0290952	0.0912423	-0.0361665
Irf2bp2	321	7.04654e-05	0.000257927	0.0159106	0.0430955	0.00936814
Cdk1	672	7.2025e-05	0.000263386	0.0306884	0.0155557	-0.854558
Tle2	609	7.52263e-05	0.000274832	0.0111868	0.00787604	0.0724467
Hist1h3d	611	7.6084e-05	0.000277703	0.0117963	0.00726817	0.0215432
Gadd45b	612	7.65024e-05	0.000278966	-0.556379	-0.474702	0.130725
Tns3	613	7.73865e-05	0.000281924	-0.00131384	0.0166211	0.094658
Ap3m2	614	8.09637e-05	0.000294677	0.00886973	0.0101089	0.0365288
Pabpc4l	323	8.1923e-05	0.000297888	0.00619438	0.0196048	-0.0235991
Scap	617	8.47661e-05	0.000307594	0.0240922	-0.00653474	0.0918803
Hebp2	675	8.47821e-05	0.000307594	0.0927662	-0.0338589	0.0445508
Picalm	676	8.48315e-05	0.000307594	0.0829296	-0.0406335	0.0662793
Olfr279	618	8.52978e-05	0.000308994	0.0175967	0.0122633	0.0248661
Pde4b	619	8.55354e-05	0.000309564	-0.593587	-1.03752	0.126359
1700025G04Rik	620	8.60915e-05	0.000311285	-0.00268039	-0.171982	0.0995805
Psmd1	677	8.67261e-05	0.000313286	0.101533	-0.101341	-0.168479
Idh1	524	8.86486e-05	0.000319931	0.0279052	0.0466164	0.101372
Gm26641	326	8.92035e-05	0.000321633	0.0137143	0.021168	0.00968734
Rrbp1	679	8.98531e-05	0.000323672	0.14606	-0.195523	-0.0805433
Ppil6	623	9.00743e-05	0.000324167	-0.00136898	0.00427567	0.0181566
Cd151	682	9.23203e-05	0.00033194	0.110268	-0.125086	0.0115527
Cmpk2	657	9.55975e-05	0.000343403	0.0381778	0.0181912	0.0400735
Nhsl1	658	9.69464e-05	0.000347925	0.0890466	-0.0439242	0.112773
Tmem35b	626	9.85826e-05	0.000353257	-0.0176234	0.00627475	0.062414
Atp6v1g2	627	9.86153e-05	0.000353257	0.00125482	0.00518284	0.0270055
Golga4	628	9.96156e-05	0.000356509	-0.0276071	-0.049981	0.12565
AL590144.2	629	0.000100952	0.000360957	-0.00383397	-0.00379626	0.0612268
Itpr3	684	0.000101382	0.00036216	0.0938867	-0.0121412	0.0643309
Cuedc1	630	0.000102121	0.000364462	-0.0231644	0.0163747	0.112408
Fuom	415	0.000104452	0.000372437	0.119805	0.0896823	-0.101502
Metrnl	341	0.000104991	0.000374011	0.0474323	0.0580691	0.0855502
Marveld3	687	0.000105312	0.00037481	0.107246	-0.0354017	0.112663
Glrx	688	0.000107695	0.000382937	0.104537	-0.116732	-0.123223
Wdr1	689	0.000108383	0.00038503	0.111912	-0.0889084	0.0286263
Hmgcs1	690	0.0001097	0.000389349	0.0514675	0.0248325	-0.0591885
Irx1	634	0.000112972	0.000400593	-0.0865768	-0.0783121	0.18013
Slc43a2	636	0.000114499	0.000405635	0.0474669	0.0175085	0.0752102
Tpi1	328	0.000117068	0.000414356	-0.130885	0.119588	-0.334061
2810402E24Rik	329	0.000120167	0.00042469	0.0338153	0.0426186	-0.00215675
Thnsl2	637	0.000120208	0.00042469	0.0293716	0.003625	0.0714419
S100b	694	0.000124919	0.000440929	0.0661014	0.00792444	-0.0233873
Acadm	639	0.000125454	0.000442414	-0.0208237	0.0467226	0.135177
Kazn	640	0.000127635	0.000449694	0.018845	-0.0692998	0.068461
Elf3	641	0.000127779	0.000449791	-0.0842258	-0.0678453	0.0413711
Slc25a35	452	0.00012836	0.000451424	0.0506034	0.0404555	0.0703316
Tex30	696	0.000131874	0.000463359	0.0655724	-0.0703035	-0.139644
Gm14966	573	0.000132616	0.000465544	0.0123266	0.0156807	0.0265657
Nrtn	644	0.000134587	0.000472035	0.0146021	0.02045	0.143907
Shroom1	645	0.000139536	0.000488946	-0.0155904	0.000222228	0.0320942
Maged1	698	0.000144182	0.000504768	0.109649	-0.0199337	0.0168001
Igf1r	648	0.000151525	0.000529995	-0.0550526	-0.00614778	0.0413712
Ing1	334	0.00015426	0.000539073	0.0193443	0.0489011	-0.0500581
Prlr	335	0.000154846	0.000540628	0.0591297	0.0870851	0.0796792
Ifnar2	700	0.000156528	0.000546007	0.0923931	-0.0131894	0.116423
Sh2d4a	336	0.000156893	0.000546788	0.0540492	0.0557029	0.0546799
A530013C23Rik	581	0.000162801	0.000566867	-0.076968	0.0344883	0.0686193
Itpk1	383	0.000163394	0.000568417	-0.0251546	0.0365403	0.0545566
Cdkn2c	337	0.000163888	0.000569108	-0.0461051	0.0509236	-0.0758397
Taok3	651	0.000163881	0.000569108	0.00474242	0.0156604	0.0457272
Rchy1	701	0.000166669	0.000578247	0.093646	-0.0280287	-0.0266107
Rflnb	653	0.000169884	0.000588343	-0.0619994	0.00135526	0.0856646
Tmem248	703	0.000169781	0.000588343	0.0921321	-0.055371	0.0196371
Odam	503	0.000171005	0.000591693	0.0627092	0.0453583	0.0814776
Parm1	654	0.000173891	0.000601139	-0.0446842	0.0124789	0.0939814
Gclm	706	0.000177679	0.000613686	0.103417	-0.056224	-0.14885
Sspn	492	0.000179213	0.000618428	0.0128858	0.0174553	0.0247449
Set	709	0.000200324	0.000690661	0.136857	-0.0833327	-0.626369
Acot6	584	0.000201152	0.000692897	0.0156216	0.021728	0.0396167
C330018D20Rik	340	0.000201469	0.00069337	0.0263725	0.0372126	0.011384
Shisa4	710	0.000205329	0.000706025	0.0401322	-0.0305884	-0.0441428
Mccc1	661	0.000209365	0.000719262	-0.0110662	0.00515	0.062287
Gm8797	711	0.000210681	0.000723138	0.136566	-0.231742	0.12446
C030014I23Rik	343	0.000215475	0.000738935	0.0141027	0.0266188	0.0261807
Mpst	662	0.000215736	0.000739174	-0.000747659	-0.0259666	0.169169
Hk2	663	0.000217804	0.000745598	-0.0178998	-0.0200051	0.0794538
Lmbrd1	664	0.000218484	0.00074726	0.0148638	0.0209683	0.086549
Borcs6	665	0.000219821	0.000751167	-0.0262042	-0.0441463	0.0653289
Bst2	713	0.000224022	0.000764845	0.129094	-0.0527174	0.0603663
Insl6	345	0.000228428	0.000779198	0.0508079	0.0650521	-0.00766727
Gm47015	714	0.000233444	0.000795608	0.0564058	0.000566139	0.0264491
Scgb2b27	715	0.000235824	0.00080301	0.237142	0.0874341	0.00687447
Pmf1	716	0.000236107	0.000803265	0.0582966	0.0158512	-0.571812
Smoc1	667	0.000242969	0.000825154	0.0157513	-0.00969823	0.0431994
Gm35696	717	0.000242794	0.000825154	0.0622417	0.0168049	0.0319656
Fam221a	347	0.000243994	0.000827906	0.0368067	0.0467121	0.021246
Pdxp	349	0.000252984	0.000857657	0.0088926	0.01917	-0.0116202
Nim1k	522	0.000256216	0.00086785	0.0056213	0.013729	0.0181363
Prol1	700	0.000256993	0.000869719	0.0698178	0.042901	0.152852
Rora	670	0.00025885	0.000875236	-0.162177	-0.115194	0.109335
Cpsf4l	671	0.00026362	0.000890584	0.00860951	0.0150008	0.0444811
H2afx	460	0.000268366	0.000905824	0.0475462	0.0396873	-0.269575
Lars	721	0.000269676	0.00090945	0.0763553	-0.0349003	-0.0733937
Acsl1	672	0.00027214	0.000916956	0.0486464	-0.0629564	0.105025
Selenoo	351	0.000279505	0.000940952	0.0313465	0.0515941	0.0564493
Mettl27	438	0.000287911	0.000967755	0.0651113	0.0650399	0.117425
Boc	444	0.000288	0.000967755	0.0433128	0.0455469	0.0640112
Hspd1	724	0.000288219	0.000967755	0.118633	-0.0608228	-0.372676
Lamb3	725	0.000288586	0.000968145	0.0409268	-0.0445125	0.0427053
Svil	678	0.000304631	0.00102108	-0.0197439	-0.0628204	0.101268
Osr1	355	0.00031116	0.00104206	0.00739842	0.0141565	0.00355193
Ttpa	727	0.000317249	0.00106153	0.0469279	-0.0699187	0.0387365
Nmnat3	514	0.000325347	0.00108768	-0.00677041	0.0196554	0.0308808
Ckb	729	0.000325996	0.00108891	0.0415925	-0.0279862	-0.0518339
Spaar	356	0.000327808	0.00109402	0.0323711	0.0488761	0.0547753
Nfkbil1	357	0.000334668	0.00111595	0.014444	0.0650265	-0.00201541
Galnt3	730	0.000338353	0.00112726	0.112903	-0.031444	0.0819198
Junos	682	0.00034982	0.00116446	-0.00566476	0.000298103	0.0127215
Irf1	683	0.0003502	0.00116472	-0.0271511	-0.030138	0.0705417
Chrna1os	472	0.000357146	0.0011868	0.039556	0.0299683	0.021507
Slc48a1	684	0.000369981	0.00122839	0.0149973	-0.000101298	0.116649
Gm14005	733	0.000378068	0.00125416	0.0558348	-0.0503159	-0.0645109
Hdac8	730	0.000387822	0.00128541	0.0487184	0.0193683	0.0610315
Cept1	685	0.000392504	0.00129981	0.0272751	0.00580332	0.108764
Prss8	686	0.000394047	0.0013038	0.0632233	-0.0609964	0.12395
Hspa2	687	0.000395496	0.00130748	-0.0152251	-0.0817534	0.128955
Efcab14	736	0.000396281	0.00130895	0.0684909	0.0254	0.0216131
Slc2a1	688	0.000397353	0.00131137	-0.146275	-0.157623	0.124262
Osgin2	362	0.00039862	0.00131442	0.0124488	0.0315389	-0.0196352
Rnf167	689	0.000403728	0.00133013	0.0193651	0.0370306	0.152702
Clip1	738	0.000404145	0.00133037	0.0815812	-0.0153687	-0.014232
Hist1h2be	690	0.000415359	0.00136612	0.0269063	0.00910497	0.0561064
Mpzl2	740	0.000424578	0.00139525	0.0936131	-0.100419	-0.0624975
Arhgap42	691	0.000433766	0.00142423	-0.0300506	0.00082473	0.035514
Dusp6	741	0.000435191	0.00142769	0.149075	-0.530531	-0.0396131
B3gntl1	364	0.000438765	0.00143819	0.0055083	0.0205375	0.00716253
Polg2	366	0.000451548	0.00147884	0.0177373	0.0286138	0.0289889
Sdc3	693	0.00046661	0.00152687	0.0125039	-0.0470643	0.0603389
Serinc3	742	0.000470914	0.00153965	0.126752	0.0516414	0.130994
Ggct	743	0.000472667	0.00154354	0.0513759	-0.0729117	-0.0289016
Proser2	744	0.000472904	0.00154354	0.0794302	0.029427	-0.0747088
Ass1	694	0.000477464	0.00155634	0.0463122	-0.0521698	0.145093
Gm2000	745	0.000477633	0.00155634	0.101766	-0.0365549	-0.0503705
Nap1l1	746	0.000480328	0.0015638	0.103118	-0.100758	-0.561233
Myd88	695	0.000481082	0.00156494	-0.143466	-0.176463	0.0736494
Larp1b	369	0.000491452	0.00159654	0.0585877	0.0729945	0.0209111
D230017M19Rik	696	0.000491626	0.00159654	0.000636351	-0.00379203	0.010126
Gramd3	697	0.000494925	0.00160533	-0.074942	-0.152981	0.0842303
Rnaseh2a	749	0.000495164	0.00160533	0.0681622	0.0254855	-0.26478
Mylk	698	0.000497325	0.00161098	0.0246528	0.00649464	0.0394276
Zmynd8	370	0.000507791	0.00164351	0.0311371	0.0376409	0.0271172
Sesn3	699	0.00050891	0.00164575	0.0273154	-0.00262626	0.0933152
Cdca3	750	0.000512174	0.00165492	0.0222545	0.00468583	-0.651355
Slc35d3	728	0.000513323	0.00165724	0.0496144	-0.0118725	0.0553528
Phlda1	701	0.000520383	0.00167863	-0.52399	-0.681949	0.272315
Tmem173	751	0.000531833	0.00171413	0.0474796	-0.132197	0.0222801
Atp6v1a	702	0.000534461	0.00172116	0.0855501	-0.102741	0.162837
Lrif1	371	0.000545231	0.00175438	0.0340813	0.0392416	-0.027949
Nthl1	372	0.000552568	0.00177651	0.00942297	0.0342423	0.0026347
Tmc4	703	0.000556796	0.00178861	0.00824862	-0.0721163	0.174477
Zfp934	373	0.000558697	0.00179322	0.00696799	0.0179456	-0.0145486
Acot13	542	0.000559421	0.00179405	0.0446742	0.0697687	0.150271
Tnfrsf18	631	0.000569317	0.00182427	0.0420048	0.0264077	-0.0388228
AI463170	705	0.000574884	0.00184058	0.0107017	0.00649866	0.0678417
Itgb3bp	758	0.000583686	0.00186721	0.054687	0.00256691	-0.161559
Gpbp1l1	707	0.000586174	0.00187362	-0.0138347	-0.017567	0.0780568
Ssh3	708	0.000594526	0.00189874	-0.00919902	-0.00803769	0.0421612
Aplp2	709	0.000597986	0.00190821	-0.0335965	-0.0874309	0.155151
Rab7b	759	0.000618603	0.00197237	0.0471558	-0.0618373	-0.00974548
Bex3	760	0.00062341	0.00198606	0.10781	-0.0650382	-0.388334
Fam234a	711	0.000631841	0.00201126	-0.120744	0.0428625	0.12422
Itgb1	761	0.000638142	0.00202964	0.10532	-0.121656	-0.00644205
Unc93b1	716	0.000646993	0.00205609	0.00580912	0.0282181	0.0775185
Slc5a9	717	0.000649205	0.00206142	0.0163055	-0.0188423	0.0592241
Trim14	386	0.00065095	0.00206527	0.0191602	0.0268353	0.032312
Mb	718	0.000668108	0.00211796	0.0338751	9.76258e-05	0.0532258
Hist1h2bg	719	0.000680093	0.00215419	0.00879631	0.00667765	0.0145982
Pigr	723	0.000725168	0.00229417	0.0221737	-0.0191158	0.0802485
Ccdc17	724	0.000725475	0.00229417	0.00645398	0.00233514	0.0188188
Trabd2b	764	0.000742941	0.00234747	0.0565546	-0.0137231	-0.00997295
Phtf2	726	0.000744205	0.00234954	-0.00501635	-0.0127692	0.0226795
Ptpn18	731	0.000776493	0.00244948	0.0214404	0.0323601	0.112143
Gm5617	659	0.000788582	0.00248558	0.0475599	0.0311283	0.0482802
Golgb1	732	0.000792089	0.00249459	0.0416591	-0.0396222	0.14443
AI463229	768	0.000800814	0.00252002	0.0580854	0.0144692	0.0055375
Uggt2	476	0.000804149	0.00252845	0.0138048	0.0188738	0.0188648
Sema4a	669	0.000805036	0.00252918	0.0267057	0.0229991	0.0411298
Pcdh10	769	0.000807766	0.00253569	0.0676688	0.0263761	0.00917763
Gse1	735	0.000810871	0.00254337	-0.00269907	-0.00670185	0.0423195
Pglyrp1	770	0.000821226	0.00257375	0.0491674	-0.0792967	-0.801042
Chst12	389	0.000832839	0.00260803	0.00635457	0.0276966	0.0265195
Ppp1r3c	726	0.000848515	0.00265496	-0.000576878	0.0151204	0.0289521
Stx19	530	0.000870256	0.00272079	0.0233098	0.0178156	-0.000498163
Uhrf1	772	0.000885281	0.00276552	0.0164211	0.00481223	-0.305723
Zfp524	392	0.000894795	0.00279298	0.0150496	0.0396931	0.0206993
Phf11d	739	0.000896878	0.00279496	-0.054188	-0.109103	0.0538645
Cda	773	0.000896407	0.00279496	0.0553986	-0.0596575	0.0276549
Nfib	681	0.00089879	0.00279865	0.119726	0.0652575	0.147112
Gulp1	740	0.000900419	0.00279921	0.00370363	0.00383784	0.0112002
Neo1	774	0.000900226	0.00279921	0.0463662	-0.011931	0.0377674
Zfp182	741	0.000903274	0.00280582	-0.00441905	0.00784297	0.0162787
Dpyd	742	0.000907649	0.00281714	-0.0316244	-0.00186606	0.0485996
Srsf5	393	0.000926093	0.00287208	-0.285671	0.0973285	0.0494155
Rrm2	693	0.00093693	0.00290335	0.0235643	0.0152627	-0.753184
Tspyl4	430	0.000946002	0.00292911	0.0248088	0.0240148	0.0094947
Dnajc9	510	0.000946847	0.00292938	0.0493765	0.0392125	-0.556743
Gen1	396	0.000951049	0.00294002	-0.00484016	0.00783558	-0.0532321
Rgs2	397	0.000957723	0.00295828	0.0326711	0.0546991	-0.162967
Akip1	400	0.00097956	0.00302331	-0.00466197	0.0504335	-0.0536551
Plekhj1	402	0.00101949	0.00314403	-0.0439649	0.0811679	0.0962028
Zfp503	745	0.0010233	0.00315327	0.0198317	0.0346988	0.0906539
Tmem52	746	0.00103256	0.00317927	-0.00798115	-0.000983778	0.0102015
Grk3	747	0.00103339	0.00317927	0.0120798	0.0172568	0.0326355
Hist1h2ae	405	0.00110654	0.00340163	0.012122	0.0196505	-0.142241
Prr15l	464	0.00112487	0.0034552	0.0388015	0.035598	0.0570348
Tle6	751	0.00114156	0.00350368	0.0152548	0.0151539	0.0802904
Isoc1	752	0.00115234	0.00353395	0.0601973	-0.0405502	0.105344
Gnao1	753	0.00116358	0.00356561	-0.00333883	-0.0110942	0.0253816
Itpr2	756	0.0012074	0.00369693	-0.033488	-0.0193116	0.102325
U2surp	408	0.00121222	0.00370875	0.0679702	0.0794165	-0.086644
Abhd18	409	0.00121852	0.00372508	0.00708339	0.0230017	0.0112844
2610528A11Rik	759	0.00126087	0.00385148	-0.220384	0.00131858	0.0659567
Clec2d	760	0.0012751	0.00389189	-0.0515608	-0.0177726	0.040517
Serpinb5	762	0.00130688	0.00398574	0.0179625	-0.218829	0.0932325
Sox8	412	0.00132247	0.00403007	0.0185304	0.0195148	-0.0149335
Stac2	764	0.00133887	0.00407685	-0.0667025	-0.00698014	0.148476
Ttc32	787	0.00134823	0.00410211	0.0628342	0.0241963	0.0321645
Zfp638	413	0.0013513	0.00410768	0.0165585	0.0510382	0.02615
Lst1	765	0.00135219	0.00410768	0.000510493	0.000192206	0.0186757
Clybl	414	0.00135403	0.00411002	0.0268118	0.0682539	0.0300732
Pttg1ip	766	0.00139323	0.00422571	-0.0305933	0.0132046	0.0993262
Rab24	416	0.00139883	0.00423934	0.0303811	0.0804043	0.0903083
Irf9	767	0.00147352	0.00446219	0.0524755	0.0274252	0.0810906
Ankmy2	419	0.00147805	0.00447242	0.032638	0.039335	0.0143391
Cbx4	420	0.00149005	0.00450519	0.0093663	0.0288585	0.0140156
Pigv	461	0.00149651	0.00451998	0.0405417	0.0348093	0.0250622
Cnst	769	0.00149729	0.00451998	0.00137775	0.00531834	0.0177175
Car5b	465	0.00150643	0.00454402	0.0337327	0.0420711	0.0653514
C130074G19Rik	600	0.00151325	0.00456103	0.0175286	0.0188227	0.0358379
Igfbp7	773	0.00151455	0.00456137	-0.0144753	0.00485988	0.0542419
Furin	774	0.00152163	0.00457913	0.0479598	0.0149906	0.0853255
Vps72	422	0.00153151	0.00460526	0.014583	0.0690602	0.0254803
Ppp1r37	775	0.00153968	0.00462623	0.0258042	0.0173661	0.104965
Gon7	425	0.00154906	0.00465081	-0.0031089	0.0343175	-0.0539792
Gm42418	777	0.00156776	0.00470327	-0.123307	0.0313755	0.224442
Nmrk1	486	0.00157993	0.0047361	0.0116978	0.0225065	0.0306126
Isoc2b	779	0.00162141	0.00485667	-0.0170824	-0.0117036	0.0389713
Papln	794	0.00163746	0.00490094	0.0804754	-0.0210782	0.100315
Irak2	780	0.00167629	0.00501329	-0.0306181	-0.00770064	0.0358594
Sfxn5	793	0.00170293	0.00508899	0.0314492	0.0168182	0.0147404
Tmem44	782	0.00175522	0.00524119	0.00446803	0.00425494	0.0141519
Aph1c	784	0.00177054	0.00528286	0.0159068	0.0147488	0.0371887
St3gal1	786	0.00178851	0.00533236	-0.088339	-0.0478493	0.0513004
Gjb2	432	0.00179166	0.00533761	0.0353014	0.0402243	0.0475717
Nr1d1	789	0.00181	0.00538811	-0.105559	-0.0505863	0.0797177
Spns2	790	0.00182696	0.00543439	0.0341162	-0.0100414	0.0752722
Crip2	795	0.0018362	0.00545768	0.120994	0.0447453	-0.0974628
Cdt1	715	0.00184329	0.00547451	0.0229986	0.0152472	-0.190066
Ppp1r15b	792	0.00186602	0.00553777	0.00513673	0.0128879	0.0738813
Tapbpl	800	0.00189648	0.00562385	0.055155	-0.00373704	0.0446322
Echdc2	801	0.00190366	0.00564081	0.0916637	-0.0085393	0.0851985
Gm10638	793	0.00190576	0.00564269	0.00284885	0.00692328	0.0167196
Igf2bp3	794	0.00190868	0.00564701	-0.0100933	-0.00139945	0.0169259
Atp6v1c2	802	0.00193113	0.00570904	0.0430582	-0.0252364	-0.0327155
Il18bp	795	0.00193783	0.00572447	0.0164548	-0.0135847	0.0458905
AC149090.1	435	0.00194217	0.00573134	-0.00850863	0.0579693	-0.0132088
Gcnt2	796	0.00194313	0.00573134	-0.0675146	-0.0925221	0.0361533
Cln3	638	0.00194486	0.00573206	-0.0397042	0.0339511	0.0674559
Lrrc8e	798	0.00196381	0.00578349	0.00596965	-0.0214484	0.0192353
Zfp750	804	0.00197935	0.00582482	0.039476	0.0157618	0.0281706
Mapk3	801	0.00201964	0.00593885	0.0136017	0.0362671	0.122024
Pgam1	456	0.002028	0.00595889	0.113846	0.0955696	-0.260174
Tanc1	802	0.00205791	0.00604048	-0.0795344	-0.1171	0.135552
Acaca	805	0.0020589	0.00604048	0.0437747	-0.0252716	-0.034248
C130032M10Rik	804	0.00208528	0.00611323	0.00645802	-0.00226219	0.020674
Tmem86a	439	0.00212742	0.00623203	0.00965043	0.0207252	0.0161752
Shpk	440	0.00217199	0.00635778	0.0132166	0.0150083	0.0127426
Tob2	441	0.00217421	0.00635943	-0.0255567	0.0463761	0.0418146
Creb3l4	443	0.00220806	0.00645355	-0.00418218	0.0177399	-0.0252537
Sybu	809	0.00225587	0.00658832	-0.00853502	-0.00329824	0.00954229
Ddx55	445	0.00230094	0.00671484	0.0322782	0.0379976	-0.000742034
Lbh	810	0.00235165	0.00685764	0.0646149	-0.0615706	-0.0926881
Dll1	446	0.00235623	0.00686583	-0.00616592	0.012086	0.00932056
Naaladl2	811	0.00237784	0.00692355	0.011526	0.0143727	0.0389401
Ccdc58	447	0.00243845	0.00709019	0.0440186	0.0532057	-0.0915993
Tmcc3	813	0.00243875	0.00709019	0.00518457	-0.077128	0.0441991
Nxf7	812	0.00244122	0.00709091	0.0469517	-0.0169779	0.0458757
Col1a2	814	0.00244267	0.00709091	-0.000601032	0.00452972	0.0125725
Grrp1	814	0.00250603	0.00726938	0.0396582	-0.0459871	0.0174423
Gsto2	771	0.00253629	0.00735162	0.00431982	0.0113931	0.0224418
AC139671.1	817	0.00259204	0.00750759	0.000783884	0.00425866	0.0155611
Stxbp6	545	0.00260164	0.00752973	0.0515425	0.0377404	0.0165727
Rps12-ps3	823	0.00263106	0.00760917	0.0798175	-0.0597112	0.0999413
Adora1	818	0.00265874	0.00768346	0.035061	0.0277142	0.0737085
A430046D13Rik	511	0.00270037	0.00779209	0.00968688	0.0114633	0.0134906
Spry4	565	0.0027003	0.00779209	0.0268435	0.0233584	-0.00587995
Fam117a	453	0.0027297	0.00786497	0.0173303	0.0170646	0.0157103
Fam111a	819	0.00272778	0.00786497	0.00996417	6.09029e-05	-0.282498
Cbx3	454	0.00278669	0.00802316	-0.0108129	0.076148	-0.29428
Cep57	455	0.00278937	0.00802491	0.0326701	0.0433607	-0.0740776
Lsm2	702	0.00280736	0.00807063	0.0677194	0.0423992	-0.487953
Ubap1	821	0.00282001	0.00809133	-0.0196761	-0.0105814	0.0509381
Odc1	822	0.00281871	0.00809133	0.0737152	-0.204332	-0.214766
Mbp	822	0.00282085	0.00809133	-0.121605	-0.236787	0.0620119
Stx16	823	0.0028351	0.00812616	0.0655044	0.0123249	-0.0202178
Alg1	642	0.00289825	0.00830099	0.0484778	0.0319605	0.0186734
Ctnnb1	826	0.00293755	0.00840732	0.0915388	-0.0434331	-0.156061
Echdc3	826	0.00303129	0.00866916	-0.0257975	0.0137312	0.0855533
Rflna	710	0.00305547	0.00873185	0.0315815	0.02167	-0.0371744
Zc3h6	494	0.0030675	0.00875975	0.0123986	0.0327777	0.0432083
Prag1	829	0.00313818	0.00895495	0.0271812	-0.00586169	0.038199
Mia2	828	0.0032113	0.00915684	0.0791107	-0.00318028	-0.0144725
Elac1	458	0.00327553	0.0093331	0.00758348	0.0162855	0.0112552
Fam46a	551	0.00329164	0.0093681	-0.00122935	0.0252392	0.0433481
Abcg1	834	0.00329636	0.0093681	-0.0228585	-0.00298552	0.0176048
Ifih1	835	0.00329733	0.0093681	-0.00417685	-0.0463061	0.0502701
Cish	836	0.00329753	0.0093681	-0.0181943	-0.166973	0.0756826
Tmem8b	837	0.00331319	0.00940567	0.00101174	0.0018579	0.0144705
Ulk3	730	0.00333488	0.00946027	-0.00183718	0.0146598	0.0275367
C2cd4b	839	0.00336041	0.00952568	-0.0230201	0.0182027	0.0564454
Abca3	830	0.00338354	0.0095842	0.0574343	-0.0319035	-0.0728151
Sbsn	840	0.00340462	0.00963684	-0.205188	-0.0729808	0.0684421
Myo6	841	0.00341493	0.00965895	-0.153064	-0.0837251	0.0774874
G730003C15Rik	504	0.00342035	0.00966719	0.0183563	0.0163632	0.0104106
Ahsg	831	0.00345132	0.00974759	0.0159441	0.00216795	-0.00960323
Smim3	843	0.00352957	0.00996129	-0.114282	-0.14006	0.020838
Acaa1b	844	0.0035484	0.0100071	-0.011976	0.000876883	0.035873
Pcdhb5	845	0.00355966	0.0100315	-0.00223593	-0.00419064	0.0147562
Trps1	846	0.00366037	0.0103078	-0.0545163	0.00140798	0.172798
Isyna1	833	0.0036729	0.0103355	0.0447951	-0.0401456	-0.159488
Lyg1	834	0.00375983	0.0105725	0.0142334	-0.010969	-0.0332518
Ptger4	847	0.00377224	0.0105996	-0.00148124	-0.0189544	0.00688402
Tab1	463	0.00385065	0.0108121	0.00882759	0.0251405	-0.00640037
Clstn1	848	0.00387928	0.0108846	0.0419287	-0.0347265	0.101289
Ckmt1	838	0.00402304	0.0112797	0.0796624	0.0390275	-0.0600126
Ube2c	839	0.0040426	0.0113263	0.0199584	0.00115578	-0.797549
Phlpp1	467	0.00409958	0.0114776	-0.0140269	0.0396854	0.0294893
Phf21a	850	0.00415467	0.0116234	-0.000327352	0.00582909	0.0500457
Per3	740	0.00415928	0.0116279	0.0191937	0.0251224	0.0571726
Cep290	843	0.00420333	0.0117403	0.0398619	0.00357579	-0.161578
Dnm3	853	0.00420558	0.0117403	-0.00500773	-0.000685562	0.0141007
Prelid2	469	0.00420919	0.0117419	-0.00276564	0.0364354	-0.00765209
Arl4a	844	0.00422517	0.011778	0.077191	0.0118714	0.0199909
Zfp296	470	0.00424429	0.0118227	-0.0139707	0.0228542	0.0254949
Cenpm	845	0.00431025	0.0119978	0.0183899	-0.00111273	-0.558223
Fas	854	0.00432385	0.012027	-0.0451599	-0.103148	0.0274411
Plekhg6	855	0.00433783	0.0120572	-0.025142	-0.0166686	0.0292611
Smim27	719	0.00436241	0.0121168	0.0622183	0.038826	0.0634814
Pja2	856	0.00444286	0.0123313	-0.000767459	0.00102448	0.0736351
Cry2	474	0.00460442	0.0127656	0.0132304	0.0385549	-0.00348769
Isg20	861	0.00460594	0.0127656	-0.0377013	-0.0316951	0.0220596
Vim	847	0.00465098	0.0128812	0.0406523	-0.0185499	-0.451297
Fcgrt	862	0.00467627	0.0129419	-0.0901389	0.00788532	0.0669841
Tcaf1	849	0.00468901	0.0129679	0.0782779	0.0246722	-0.0970537
Iqsec1	863	0.00470613	0.0130059	-0.0912505	-0.0066242	0.0575316
Abhd5	864	0.00472535	0.0130497	0.0621318	-0.131249	0.089484
Mlxip	865	0.00474664	0.0130991	-0.0237086	-0.0540981	0.0465816
Lims2	794	0.0047723	0.0131605	0.0238147	0.0174077	0.0343293
Rsad1	480	0.00481086	0.0132385	0.00445346	0.0160298	-0.00167011
Vopp1	867	0.00480751	0.0132385	0.0328375	0.0204066	0.0506611
Nfkbie	868	0.00480938	0.0132385	-0.0180339	-0.018921	0.0113557
Fabp5	854	0.00486367	0.0133742	0.167469	-0.721985	0.0270996
Zfp36l1	481	0.00489083	0.0134393	-0.180411	0.0992217	0.0878475
Irf2bpl	870	0.00492418	0.0135213	-0.161656	-0.186442	0.115585
Gabarapl1	871	0.00493618	0.0135447	-0.14059	-0.0852787	0.104839
Phf1	873	0.00495315	0.0135816	-0.0906502	-0.0183967	0.0482558
4833407H14Rik	484	0.00502956	0.0137813	0.0056264	0.0115723	-0.00384671
Snhg12	875	0.00507424	0.0138938	-0.00721894	0.00016491	0.0240257
Ilf2	856	0.00511301	0.0139901	0.0716848	-0.0066141	-0.273578
Aaed1	876	0.0051481	0.0140761	-0.0333924	-0.0165927	0.0818829
Sigirr	487	0.00525353	0.0143542	0.0298774	0.0349794	0.0204495
Tatdn3	488	0.00533281	0.0145605	0.0198908	0.0287246	0.0302283
Dusp4	858	0.00534718	0.0145894	0.0374515	0.0140671	0.00285177
Slc5a1	594	0.0053701	0.0146416	0.0226644	0.0285444	0.0493867
Gm15417	860	0.00540707	0.014732	0.0470041	0.0190764	0.0380625
Gm20075	757	0.00543903	0.0148086	0.00695454	0.00778679	0.0122616
Eya1	490	0.00544342	0.0148101	0.0133206	0.0283518	0.0364848
1810044D09Rik	883	0.00561387	0.0152631	-0.00489353	0.00100972	0.0479561
Atp8b5	748	0.00564055	0.0153248	0.00776035	0.0126524	0.022712
Tspan6	862	0.00569143	0.0154522	0.0357939	0.00124277	-0.0456977
Zfp40	886	0.00571705	0.0155108	0.0117414	0.00645756	0.0120848
Tmem161b	493	0.00603857	0.0163716	0.00296401	0.0193518	-0.0128075
Fen1	865	0.00617857	0.0167277	0.0304974	-0.0243219	-0.314447
Cep126	885	0.0061786	0.0167277	0.0100757	0.00637455	0.0141293
Guf1	633	0.00625604	0.0169255	0.0424345	0.0310694	0.0265309
Ppcdc	544	0.00627535	0.0169573	0.0156743	0.032473	0.0427505
Cd3eap	867	0.00627657	0.0169573	0.0601904	0.0216687	-0.0343012
Gm6710	887	0.00629029	0.0169824	0.00563598	0.00545101	0.0114717
Pmepa1	888	0.00635735	0.0171515	-0.151127	-0.239592	0.107366
Fam162a	497	0.0063793	0.0171987	-0.135471	0.0796897	-0.252173
Eif4ebp1	889	0.00643457	0.0173356	-0.0417014	-0.023453	0.108722
Hcar2	890	0.00647739	0.0174388	-0.121054	-0.217047	0.0174886
Snph	891	0.00649181	0.0174654	0.00736868	0.00575381	0.0135216
Rhoj	872	0.00652848	0.0175518	0.0373523	-0.024473	-0.0132496
Cpeb3	499	0.00660702	0.0177506	0.00136631	0.0223508	0.0131455
Gm11266	677	0.0066785	0.0179302	0.0276734	0.0213333	0.0337885
Cpeb2	501	0.00670874	0.0179863	0.00921684	0.02448	-0.000595511
Rrm1	818	0.00670408	0.0179863	0.0312363	0.0188699	-0.429013
Thumpd2	502	0.00674021	0.0180456	0.00700601	0.0137625	-0.00497494
Spen	892	0.00673635	0.0180456	-0.0634651	-0.0267717	0.0320722
Gm47438	893	0.00678607	0.0181558	0.0119972	0.00499982	0.0140846
Cnih4	875	0.00689718	0.0184403	0.0753523	-0.209103	-0.423157
Ccnb2	876	0.00690772	0.0184557	0.015153	-0.0117216	-0.733344
Parp14	894	0.00694404	0.0185399	-0.039377	-0.0363438	0.0280336
Tsen34	788	0.00695881	0.0185664	0.0812752	0.0460373	-0.562762
Rgs16	878	0.00699344	0.0186459	0.0216562	-0.00391858	0.0179624
Tmem177	505	0.00710132	0.0189074	0.00807171	0.0178961	-0.0012311
Sh3bgr	895	0.0070969	0.0189074	0.0109395	0.00190382	0.0272021
Lpar6	506	0.00713851	0.0189934	0.0396066	0.0463748	-0.00407445
4930415O20Rik	898	0.00723963	0.0192491	0.0422158	0.00779849	0.057955
Scnm1	507	0.00726583	0.0193055	-0.0181517	0.0344511	-0.0018651
Pfkfb2	899	0.00740334	0.0196573	-0.000264797	-0.00191266	0.0138673
Txndc16	900	0.00747932	0.0198454	-0.0165914	0.0135561	0.0538776
Hdgf	881	0.00760926	0.0201763	0.0987619	-0.14618	-0.532644
Tnip2	901	0.00765959	0.0202958	-0.0647516	-0.0492334	0.0426616
Ctso	787	0.00770035	0.0203898	0.0396162	0.0236825	0.0273962
Serpinb6b	903	0.00772836	0.0204499	0.00683254	-0.00187231	0.0117716
Ttc36	904	0.00773642	0.0204572	-0.0215718	0.00398282	0.0494825
Plekhb1	883	0.007772	0.0205373	0.0785455	0.0112714	0.0407926
Trim45	509	0.00788553	0.020823	-0.00157637	0.013837	-0.0103935
Add3	759	0.00789699	0.0208247	-0.0729729	0.0299952	0.0649657
Tcf19	884	0.00789631	0.0208247	0.0172223	4.7292e-05	-0.411855
Ezr	907	0.00794441	0.0209355	-0.056243	-0.331718	0.0961548
Galm	803	0.00801693	0.0211122	-0.0374059	0.0210458	0.0422261
Cebpd	909	0.00811632	0.0213593	-0.94228	-0.926121	0.194261
Gadd45g	512	0.00828695	0.0217935	0.0274575	0.0475675	0.0526689
CAAA01118383.1	910	0.00841059	0.0221036	0.0314601	-0.00627212	0.0602313
Klhl9	735	0.00848129	0.0222742	0.0489983	0.034527	0.0427394
Glt28d2	911	0.00850134	0.0223117	0.0394053	-0.0167091	0.0625028
Ddi2	912	0.00872204	0.0228754	0.00801051	-0.0415078	0.0811101
Gltp	892	0.00880456	0.0230761	0.0430492	0.0017393	-0.301353
Pacs1	913	0.00891068	0.0233384	0.0235286	0.00883824	0.0533509
Scgb1c1	914	0.00912702	0.0238888	0.00937346	-0.00188562	0.0153804
Abcd4	527	0.00916908	0.0239826	0.0190159	0.0268733	0.0342264
Clasp2	917	0.00937607	0.0245074	0.00257431	-0.00291213	0.0323826
Cdc20	897	0.00953792	0.0249135	0.0122244	0.0013657	-0.487196
Kmt5a	900	0.00975272	0.0254574	0.0755484	-0.0159959	-0.0601374
Rbmx	901	0.00980685	0.0255813	0.0482325	0.013225	-0.034343
Xndc1	520	0.00982769	0.0256184	-0.0112296	0.0162532	-0.0440899
Fam71e1	920	0.00990439	0.0258009	-0.00771832	-0.00349986	0.012292
Dync1i2	902	0.00999058	0.0260079	0.0710634	-0.0556338	-0.141996
Ddx46	903	0.0100204	0.026068	0.0633177	0.0127489	-0.142333
Lmntd2	921	0.0100767	0.0261855	-0.00715702	0.00100646	0.00951951
Pdzd2	922	0.0100792	0.0261855	-0.0123027	-0.0143597	0.0628366
Pcdhb7	923	0.0101325	0.0263064	0.0138248	-0.00273095	0.0225559
Ifi47	924	0.0101981	0.0264589	-0.000219564	-0.0737346	0.04002
C1rb	927	0.0104125	0.026997	-0.00254215	-0.00415967	0.00722964
Ahcyl2	928	0.010585	0.0274258	-0.0401387	-0.0154054	0.04113
9230102O04Rik	929	0.0107773	0.0279053	0.0256737	0.000776039	0.0339467
AC123870.1	590	0.0108057	0.0279601	0.0207453	0.0182433	0.00719333
Crbn	907	0.0108165	0.0279692	0.036823	0.0150655	0.0249128
H2-Q6	908	0.0109997	0.0284239	0.0531925	0.0239486	-0.0180678
Hdac7	930	0.0110131	0.0284395	-0.00539765	-0.0177201	0.0100584
Oat	905	0.0111051	0.0286578	0.0538597	0.029445	-0.0790056
Ercc6l2	533	0.0112276	0.0289351	0.0278815	0.0278589	-0.0219167
Fgfbp3	832	0.0112242	0.0289351	0.00688189	0.0104438	0.0187737
Aktip	932	0.0113909	0.0293365	0.0277865	0.00263245	0.0719692
Trp53bp1	537	0.0118565	0.0305153	0.0273673	0.0289069	-0.00270136
Agk	538	0.0119011	0.0306096	0.00250415	0.0233796	-0.00914418
Dlgap1	916	0.0119619	0.0307455	0.0115279	-0.00408067	-0.113016
Eif4g1	917	0.0119819	0.0307763	0.0732384	-0.042971	-0.157965
Gins2	919	0.0120609	0.0309587	0.0349981	-0.000119803	-0.486638
N4bp3	920	0.012218	0.0313411	0.0519035	-0.144699	-0.0783317
Tfcp2l1	938	0.0123661	0.0316998	-0.00738361	0.0118153	0.0310554
Cdr2	922	0.0123996	0.0317646	0.0267398	-0.0041247	-0.0218936
Ttc12	939	0.0125438	0.0321127	0.0261034	0.00482895	0.0343969
Kat8	583	0.0126703	0.0324152	0.0267541	0.0270948	0.0193654
Fbxo44	546	0.0126989	0.0324237	0.022064	0.0420611	0.0470471
Slc8b1	940	0.0126834	0.0324237	-0.0221379	0.0123502	0.0451202
Ctsa	941	0.0126975	0.0324237	0.0472888	0.01725	0.127044
Pmm1	548	0.0130041	0.033181	-0.0764023	0.0605317	-0.0597687
Myo1e	942	0.0130174	0.0331932	-0.106214	-0.242622	0.0673143
Phc3	944	0.0131265	0.0334491	-0.0414036	-0.0368777	0.0439774
Ap5z1	945	0.0131986	0.0336107	0.00474198	-0.00217778	0.0223634
Fermt1	925	0.0133448	0.0339605	0.0557611	-0.0452112	0.0217735
Spink5	946	0.0133951	0.0340661	0.0238585	-0.156306	0.0362421
Lysmd2	927	0.0134324	0.0341384	0.0368311	-0.00206327	-0.0990599
Dhfr	812	0.0134563	0.0341768	0.0206993	0.0140992	-0.347962
Mfsd4b4	929	0.013782	0.034981	0.0238326	-0.00654536	0.0102083
Xaf1	552	0.0138636	0.0351649	0.00102231	0.034457	0.0318189
Map2k5	950	0.0141048	0.03573	-0.00426439	-0.00907929	0.0356369
Cd14	951	0.0141049	0.03573	-0.545951	-1.04081	0.136886
Carf	557	0.0143081	0.0362209	-0.0002868	0.0141052	-0.00276226
Fbxl12	613	0.0143542	0.0363137	0.0194365	0.0257725	0.0354347
Meltf	930	0.0146228	0.036969	0.0286495	-0.00298933	-0.00209955
Taf1a	558	0.0147221	0.0371957	-0.00299605	0.0201194	-0.0054472
Ildr1	956	0.0147346	0.0372029	0.0316709	-0.000667664	0.0680478
Hdlbp	932	0.0147614	0.0372463	0.0866243	-0.247879	0.0165931
Ppm1k	559	0.0148441	0.0374304	-0.00756846	0.016405	0.00330205
Nr3c1	560	0.0148828	0.0375034	0.0458873	0.0467675	0.0184684
Kif1c	935	0.0149487	0.0376449	0.0480114	-0.0547037	0.0570803
Nicn1	562	0.0149839	0.0377091	-0.00770095	0.0313655	0.0104703
Rbm5	957	0.0152342	0.0383139	-0.022801	-0.00126839	0.077901
Oxtr	958	0.015327	0.0385221	0.0134742	0.0051013	0.0189721
Ptprf	960	0.0153749	0.0386175	0.0585501	-0.0938332	0.118764
Exosc8	563	0.0154425	0.0387621	0.0141237	0.0345554	-0.291821
Zranb2	564	0.0155414	0.0389848	-0.0166533	0.0572504	-0.148071
Cbx7	567	0.0157482	0.0394618	-0.0371283	0.015924	0.005926
Gm4951	937	0.015752	0.0394618	0.0145353	-0.01282	0.00580023
Ube2l6	973	0.0158157	0.0395957	0.0233097	0.00494803	0.0258197
Lncpint	963	0.016107	0.0402988	-0.054789	0.00586489	0.0315497
Mkx	604	0.0163101	0.0407541	0.0135808	0.0121582	-0.0130737
Rad50	650	0.0163051	0.0407541	0.0442713	0.0342178	-0.103438
Tcim	965	0.0163536	0.0408363	-0.0530314	-0.0957068	0.0486846
Gm26825	967	0.0166007	0.0414265	0.00650632	-0.00044608	0.0130487
Cfb	968	0.0166605	0.041549	-0.0147854	-0.0196672	0.0105213
Zdhhc21	940	0.0166763	0.0415559	0.0343929	-0.0157473	-0.036443
Idh2	941	0.0166848	0.0415559	0.0608936	-0.0187567	-0.314127
Gm20554	629	0.0170619	0.0424677	0.0253767	0.0296723	0.043733
Dcp1b	687	0.0171796	0.042733	0.0180331	0.0167368	0.0252281
Sertad4	569	0.0172226	0.0428124	0.0357857	0.0350349	-0.0343554
Pcna	943	0.0173165	0.0430182	0.0420557	0.00943205	-0.687492
Smg7	714	0.0173507	0.0430753	0.0345533	0.0345569	-0.0411538
Hist2h3c2	570	0.0175652	0.0435797	0.0119579	0.0156248	0.00390217
Lars2	571	0.0176384	0.0437333	0.0163861	0.0306551	0.0255173
1810021B22Rik	572	0.0176549	0.0437349	0.0105363	0.0164572	0.0112222
Nhs	972	0.0176617	0.0437349	-0.00649844	-0.00448547	0.0100847
Ehbp1l1	575	0.0178555	0.0441864	0.00301713	0.00974417	0.00931595
Notch1	576	0.0184523	0.045634	0.0207805	0.0326576	0.0337069
Sufu	577	0.0186217	0.0460233	0.0201517	0.0330344	0.0404749
Golim4	947	0.0186433	0.0460472	0.0481803	0.0169126	-0.0891297
C730034F03Rik	578	0.0186784	0.0460858	-0.00384496	0.0127848	-9.48397e-05
Fbxl7	948	0.0186828	0.0460858	0.021544	-0.0109528	-0.00954783
Rilp	977	0.0187334	0.0461812	-0.00241794	0.00498949	0.00952862
Cbfa2t3	579	0.0187641	0.0462272	0.0046855	0.0116851	0.00604778
Fam234b	580	0.0188108	0.0463126	-0.00745107	0.0323332	0.0263995
H2-Eb1	978	0.018823	0.0463132	0.00771222	0.00476557	0.013087
Ccnl2	979	0.0188595	0.0463736	-0.0600496	-0.0835161	0.0671178
A230050P20Rik	887	0.0189557	0.0465507	0.022297	0.0121884	0.00599548
Zfp438	980	0.0189456	0.0465507	-0.000139924	0.00347996	0.0101164
Ak1	951	0.0190438	0.0466879	0.0455418	0.0190303	-0.0971658
Tle1	981	0.0190294	0.0466879	-0.0326734	-0.109537	0.0711909
Btbd9	982	0.0190479	0.0466879	-0.0283582	-0.0456628	0.0502782
Ifitm3	952	0.0190888	0.046755	0.100415	-0.327375	-0.324907
Fam46b	983	0.0190995	0.046755	-0.00231072	0.0025176	0.0115675
Mblac2	636	0.0191635	0.046882	0.0156902	0.0146599	0.0043816
Ddx60	985	0.0193109	0.0472127	0.00369668	0.000318007	0.0184432
Hspa9	953	0.0194462	0.0475134	0.0809692	-0.00352449	-0.0923271
Vat1	954	0.0195766	0.0478016	0.0537855	-0.0297695	0.0811874
Fam219a	587	0.0199859	0.0487701	0.00510421	0.00951859	0.00567178
Ttc3	957	0.0203855	0.0497137	0.0650174	-0.00669584	0.0469522
Card19	958	0.0204604	0.0498649	0.0527445	-0.010648	-0.0259467
Rfc3	720	0.0204933	0.0499135	0.0323889	0.0257531	-0.361365
Ralgps1	658	0.0206053	0.0501546	0.00628084	0.0139242	0.0192593
Smc2	656	0.0209609	0.0509881	0.0194993	0.0191858	-0.707492
Gm43796	663	0.0210929	0.0512768	0.00480635	0.0105778	0.0148369
Hsf2	589	0.0213325	0.0518083	0.00892626	0.0118766	-0.00535974
Nfasc	991	0.0213383	0.0518083	-0.0208842	-0.0074014	0.0140275
Tap2	1029	0.0213953	0.0519139	0.0438002	0.0191994	0.0438259
Acbd4	992	0.0215719	0.0523095	-0.0417621	0.00940942	0.0475044
Lyn	993	0.0216494	0.0524644	0.0102627	0.000983388	0.0367934
Nemp1	592	0.0220358	0.0533672	0.00706059	0.0191766	0.00205714
Csrp1	994	0.0221272	0.0535551	-0.28666	-0.113311	0.077527
6430573F11Rik	593	0.0222255	0.0537593	-0.00163691	0.0139637	0.0126154
Crybg2	996	0.0225886	0.0546033	0.00102655	-0.0120657	0.0205475
Nav3	998	0.0230842	0.0557664	-0.0149756	-0.0647675	0.0457943
Tnfaip2	999	0.0232537	0.0561407	-0.0266539	-0.00940168	0.00941236
Cln5	736	0.0233497	0.0563372	0.0345257	0.027413	0.0192494
Mbnl2	967	0.023381	0.0563775	0.0749106	-0.0775535	-0.0213934
Chaf1b	968	0.0235963	0.0568611	0.0132572	0.00363345	-0.268988
Litaf	1000	0.0237392	0.0571697	-0.377562	-0.553996	0.127299
Txnip	1001	0.0239195	0.057568	-0.629437	-0.293246	0.143997
Gm46404	597	0.0239812	0.0576805	-0.00148218	0.010356	-0.00191762
Accs	1003	0.0240447	0.057797	0.00541658	0.0100106	0.0202548
Vamp1	598	0.0241575	0.0580322	0.011991	0.023765	-0.00622326
A330041J22Rik	1004	0.0243869	0.0585469	-0.00215115	-0.00274506	0.0224255
Pitpnc1	1006	0.0247432	0.0593652	0.0443714	-0.0180374	0.0897489
D630039A03Rik	705	0.0248007	0.0594292	-0.000481696	0.011615	0.0161763
Tmem125	1007	0.024794	0.0594292	-0.0247401	-0.0615362	0.0374103
Phkg2	851	0.0249499	0.0597496	0.00645584	0.029758	0.0652946
Pabpc1l	601	0.024989	0.0598062	0.0184757	0.0237876	0.0290853
Gm20498	898	0.0253264	0.0605761	0.0096345	0.00841484	0.0160582
Spp1	972	0.0257642	0.0615849	0.0669549	-0.0752105	-0.0148602
Zfp952	606	0.0262563	0.0627224	0.00589033	0.00913123	-0.0140873
Ppp1r15a	1016	0.0264229	0.0630459	-0.286909	-0.129011	0.0500839
Ier5	1017	0.0264244	0.0630459	-0.516257	-0.494453	0.0594002
Akap8l	607	0.0265847	0.0633892	-0.037378	0.0295543	0.0144716
Gnpda1	773	0.0268183	0.0639068	0.0148016	0.0119313	0.0176196
Uck2	975	0.0269905	0.0642773	0.0390563	-0.147389	-0.0468927
Cisd3	978	0.0271575	0.0646352	0.042701	0.0163513	-0.0169956
Ftx	692	0.0273086	0.0649547	0.0026095	0.00814508	0.00832157
Nos1ap	1020	0.027329	0.0649632	-0.0897514	-0.0247442	0.0468088
Kdm7a	916	0.02775	0.0659232	0.024686	0.0194248	0.0443487
Eef1akmt2	979	0.0280483	0.066591	0.0418155	0.0162114	-0.0464392
Siva1	610	0.0281551	0.0668034	0.0441148	0.0485826	-0.418546
Birc5	982	0.0284476	0.0674559	0.0165578	-0.00664436	-0.992442
4933434E20Rik	612	0.0285107	0.067564	0.0347203	0.0504007	0.037058
Ifit1	1028	0.028758	0.0681082	-0.00428698	-0.0134156	0.0245823
Mxra8	614	0.0292045	0.0691234	0.00474566	0.0108987	0.00617549
Aif1l	985	0.0292308	0.0691431	0.0219804	-0.0144386	-0.146479
Zfp839	1029	0.0292528	0.0691527	0.00188386	0.00740236	0.0147631
Apol9b	1064	0.0299373	0.0707275	0.025709	0.0120355	0.0166427
Abca5	1032	0.029977	0.070778	-0.0104282	-0.00717236	0.0155592
Ip6k1	1034	0.0301591	0.0711643	-0.039753	-0.0230509	0.0460066
1600020E01Rik	618	0.0303694	0.0715621	-0.0138873	0.0252519	-0.0309842
Pcdhb4	1036	0.0303639	0.0715621	-0.0023001	0.00230243	0.0132353
Snx10	1037	0.0303833	0.0715621	-0.0310592	-0.0969286	0.0436076
Nom1	619	0.0307917	0.0724799	0.00525774	0.0299648	-0.0538575
Stox2	991	0.0308385	0.0725014	0.0358822	-0.0175926	-0.0282239
Ip6k2	1061	0.0308217	0.0725014	0.0366481	-0.0435257	0.0547841
Rgma	621	0.031071	0.0730037	-0.0282886	0.0272038	0.00561485
A830035O19Rik	1071	0.0311624	0.0731737	0.0105927	-0.00226	0.0138684
mt-Nd4l	622	0.0313899	0.0736183	0.0227009	0.0563001	-0.0242713
Tia1	993	0.0313845	0.0736183	0.0416192	-0.0361224	-0.053411
St8sia6	623	0.0318193	0.0745801	0.0122197	0.0198172	-0.0842233
Mfn1	1041	0.0323295	0.07573	-0.0118912	0.014168	0.056965
2900093K20Rik	624	0.0324582	0.0759852	-0.0135028	0.0347991	0.0366526
Ints6l	717	0.0325457	0.076144	0.0196242	0.0177134	0.0175634
Pecam1	625	0.0330742	0.0773335	0.00182766	0.00887529	-0.000495622
Gmnn	969	0.033119	0.0773913	0.0171483	0.0101544	-0.404819
Nqo1	1044	0.0331944	0.0775205	-0.105629	-0.0599688	0.0173327
Zfp518a	626	0.033455	0.0780819	0.00933274	0.0131167	-0.0160219
Gm49322	1045	0.033603	0.0783798	-0.00371643	-0.00169892	0.00968658
Kiss1r	627	0.0336725	0.0784946	-0.0230241	0.0189683	0.00919313
Spg20	628	0.0340447	0.0793143	0.000364037	0.0298522	0.0254638
Yjefn3	755	0.03409	0.0793241	-0.000194122	0.00878968	0.0131797
Mitf	1047	0.0340896	0.0793241	-0.00173613	0.00218296	0.0142501
Nek7	1050	0.0342742	0.0797047	0.00682553	-0.092621	0.0483889
Sytl4	1009	0.0348112	0.0809046	0.0117591	0.0067105	0.00296314
Mknk2	1011	0.0348816	0.0810194	0.0356189	0.0106288	0.0359027
Hint1	1012	0.0352076	0.0817274	0.0598087	-0.0322418	-1.30193
H2-Ab1	1055	0.0352425	0.0817592	0.00450575	0.000773387	0.0182808
Srp54a	1056	0.0353183	0.0818857	0.0119111	-0.00523947	0.0410301
Abr	632	0.0353725	0.0819623	0.00278984	0.0115915	0.00802534
Rtkn	1013	0.0356556	0.0825687	0.0517241	-0.0492118	0.0427773
Cngb1	1057	0.0358713	0.0830184	-0.0160972	-0.000823378	0.0385878
Zfp420	634	0.0362472	0.0838379	0.000906324	0.00824062	0.00570079
Ptpru	635	0.0363524	0.0839942	-0.00610471	0.0114452	0.000429355
Krtcap3	1015	0.0363583	0.0839942	0.0597843	0.00708143	0.0215097
Flot1	1059	0.0364085	0.0840599	0.0134293	-0.0460628	0.0869027
Rtn4ip1	1016	0.0366438	0.0845525	0.0120713	0.00111253	-0.00509555
Rbl2	875	0.0366924	0.0846139	-0.00567863	0.0193993	0.0361281
Haus4	637	0.0374189	0.0862379	0.00131296	0.0194995	-0.304672
Asb16	639	0.037718	0.0868752	-0.00230542	0.0101826	0.00888997
Dclre1b	640	0.03777	0.086943	0.00730153	0.0124169	-0.00678852
Hmgb3	1018	0.03796	0.0873284	0.0547192	-0.0680421	-0.228666
Cep44	644	0.0386874	0.0889488	0.0174493	0.0326747	-0.0187908
Gpt	645	0.0388152	0.0891894	-0.00624614	0.0174424	-0.105925
Lrig3	646	0.0389165	0.0893691	-0.003733	0.0155732	0.0108914
Rrn3	647	0.0390694	0.0896668	0.016624	0.0261823	-0.000655709
Gnai2	1065	0.0392389	0.0900023	-0.0035723	-0.111098	0.0902283
Hook3	1095	0.0394139	0.0903498	0.0405817	-0.00258325	0.0542727
Eloa	1056	0.0394477	0.0903737	0.00557158	0.0172975	0.0414759
4833420G17Rik	649	0.0395064	0.0904544	-0.00800446	0.0324444	0.0352782
Mtss1l	652	0.040001	0.0914782	0.00487407	0.0244109	-0.00710649
Nagk	827	0.039997	0.0914782	0.0411424	0.0372121	0.0722862
Ikzf2	1068	0.0400381	0.0915088	-0.0261978	8.08615e-05	0.0219176
Kat6b	653	0.0403341	0.0921309	0.00579968	0.0245291	0.00984199
Rhou	1071	0.0408658	0.0932901	-0.0615743	-0.163094	0.0647086
Bri3	878	0.0408997	0.0933124	-0.167684	0.0452459	0.0982635
Snap29	655	0.0411251	0.0937712	-0.00393437	0.0255	0.014866
Trim68	766	0.0411739	0.0938269	-0.0135479	0.0228619	0.0350914
Mcm2	1024	0.0412288	0.0938944	0.0160602	-0.000951421	-0.260913
Cenpw	1025	0.0412522	0.0938944	0.0211343	-0.0162975	-0.679389
Gm20219	1073	0.0413264	0.0940078	0.00927839	-0.00109385	0.0353601
Pnp	1027	0.0414753	0.0942659	0.0360757	-0.0212073	-0.00402655
Acy3	1059	0.0414887	0.0942659	0.0258181	0.00419661	0.0284121
Tmem106a	1074	0.0415713	0.094398	0.003225	-0.0127705	0.00916168
Dmac2	660	0.0417181	0.0946756	0.0233207	0.0298283	-0.0141033
Batf	1075	0.042007	0.095275	-0.000913326	-0.0284338	0.00896659
Ntf5	1061	0.0427844	0.0969813	-0.00318697	0.0129787	0.0303902
Prim1	1032	0.0432335	0.0979419	0.0204593	0.0105794	-0.319396
Rrm2b	776	0.0433736	0.0982015	0.0220935	0.0193624	-0.00845617
Cntfr	662	0.0435061	0.0983621	-0.00839348	0.00771264	0.00313192
Zfand3	778	0.043521	0.0983621	0.0347695	0.0320359	0.0373649
Rab26	972	0.0435112	0.0983621	0.00710546	0.0078382	0.0151397
Rnaseh2c	1033	0.0442138	0.0998202	0.0603511	0.000435305	-0.42628
Tubb4b	1034	0.0442179	0.0998202	0.0874729	-0.112555	-0.928559
Kitl	781	0.0449969	0.101519	0.0234444	0.0305315	0.0549002
Pcdhb17	817	0.0456209	0.102867	0.0159582	0.0168158	0.0251529
Prkab1	667	0.0457749	0.103154	0.0204381	0.0328168	0.00112818
Mtus1	1083	0.0459987	0.103598	0.00805418	-0.00957173	0.0402346
Atl2	700	0.0466774	0.105065	0.0212527	0.0280074	0.0286335
Vps13a	1084	0.0467469	0.10508	0.024129	-0.0366562	0.053138
Rnf31	1085	0.0467628	0.10508	-0.0202816	-0.00364907	0.0242585
Gm7694	1086	0.0467659	0.10508	-0.00912618	-0.00597976	0.018282
Tatdn1	1036	0.0468038	0.105104	0.0364752	-0.00701613	-0.0155
Atxn7l1	908	0.0476557	0.106955	0.0158962	0.0157201	0.0227409
Gm12530	1088	0.047824	0.10727	0.00489856	-0.00728872	0.00815542
Aifm2	793	0.0483005	0.10823	0.0149553	0.0162811	0.0262501
Dtl	1037	0.0483081	0.10823	0.0125392	-0.00429511	-0.228068
Gm1673	1039	0.0483792	0.108327	0.0383421	-0.0366818	-0.0646992
Anks3	673	0.0485289	0.108599	0.00868243	0.0251299	0.0269474
Acad9	1092	0.0485659	0.108619	-0.00775263	-0.00898908	0.0446241
Apoe	798	0.0488204	0.109062	-0.517124	0.0469882	0.0666209
Rab15	1093	0.0488037	0.109062	0.0213785	-0.0958416	0.0835715
Ercc4	675	0.049375	0.110236	-0.005503	0.0123255	0.00674002
Dram2	967	0.0494944	0.110375	0.0175965	0.0292772	0.0749018
Aff4	1094	0.0494743	0.110375	-0.0216955	-0.0570448	0.0816842
Zfp458	676	0.0498126	0.111021	-0.000490107	0.00808458	0.00144653
Ace	1096	0.0499395	0.111239	-0.0215683	-0.011215	0.0310127
Erich2	1098	0.0499978	0.111305	-0.00305561	-0.00895868	0.0125079
Zc3h8	678	0.0502571	0.111753	0.00513136	0.010642	0.00528462
Eprs	1041	0.0502529	0.111753	0.0584943	-0.0366218	-0.194673
Nckap5l	679	0.0503458	0.111886	0.0102983	0.011653	0.00420824
Zdhhc1	1104	0.0504465	0.112045	0.0248543	0.00979528	0.0359769
Nol3	1099	0.0505535	0.112218	0.0194304	0.00760517	0.0420481
Ell	1100	0.0510332	0.113218	-0.0690519	-0.0919324	0.0227643
Kcnq1ot1	1043	0.0513019	0.113749	0.0710061	-0.101894	-0.078691
Bclaf1	680	0.0514211	0.113947	-0.00189403	0.0612121	-0.19522
Hs3st3b1	983	0.0516068	0.114293	0.0248728	0.014839	-0.0936594
Terf2ip	721	0.0517827	0.114617	0.0230607	0.0268561	0.00769678
BC017643	1101	0.0518494	0.114671	-0.00410977	-0.0231457	0.0289647
Gm15867	1102	0.0518665	0.114671	-0.0486914	-0.0588898	0.0488495
Tfap4	682	0.0519705	0.114835	-0.00281474	0.0109869	-0.00129309
Sertad3	1103	0.0520324	0.114906	0.0151391	-0.00292576	0.0268152
Ice2	683	0.052447	0.115689	0.00201809	0.0119132	0.00278269
Alpl	1045	0.0524331	0.115689	0.0317866	0.00125188	-0.0130449
Xpo4	686	0.0528865	0.116592	0.00600509	0.0221693	-0.0486749
Sgsh	1047	0.0529207	0.116601	0.0122699	-0.00201133	-0.0171929
Rfc4	830	0.0532599	0.117281	0.026104	0.0203216	-0.327628
Fndc10	744	0.0543167	0.11954	0.02247	0.0248611	0.0181079
Zfp512b	867	0.0544547	0.119776	0.0206671	0.0158907	-0.00306092
Wdr54	691	0.0545254	0.119863	-0.000564015	0.00970543	-0.015302
U2af1	1051	0.0550717	0.120995	0.0605253	-0.0592962	-0.316607
Pof1b	696	0.0552037	0.121216	0.0226444	0.0234786	0.0114253
Usp53	695	0.0553935	0.121563	0.00222436	0.0219093	0.0155768
Arl6ip1	697	0.0557179	0.122205	0.0203371	0.0600165	-0.121418
Tspan33	1109	0.0560656	0.122898	0.00922404	0.00807007	0.018875
Fkbpl	1112	0.0567189	0.12426	0.0195864	0.00670038	0.0222358
Them6	1037	0.0571827	0.125205	0.0108358	0.00499406	0.00290219
Esco2	703	0.0576681	0.126196	0.00429666	0.00527248	-0.244869
Hist1h1e	704	0.0577621	0.12633	0.0103453	0.0178535	-0.241288
Klhdc8b	931	0.0583396	0.127521	-0.0145392	0.00881539	0.0139547
Kif21a	1061	0.0586736	0.128178	0.0422713	-0.0644556	-0.147425
Pla2g15	708	0.059525	0.129965	0.00160302	0.00694639	-0.00764741
Nrm	1063	0.0598295	0.130556	0.012335	-0.0179909	-0.45406
Eif2b4	1065	0.0600117	0.130879	0.0427692	-0.0257697	-0.0283711
Susd6	1119	0.0600938	0.130984	-0.0812294	-0.0841215	0.0465441
Bbs5	709	0.0603339	0.131433	-0.00144915	0.00829112	-0.0103576
Ippk	1120	0.0611376	0.133109	-0.0119713	-0.0111173	0.0264774
1810024B03Rik	745	0.0612086	0.133188	0.01139	0.0175962	0.0093971
Ncoa3	711	0.0622194	0.135311	0.00876839	0.0231015	0.00800786
Tm7sf3	1121	0.0622902	0.135389	-0.00434487	0.00544464	0.0313285
Abhd3	1129	0.0625848	0.135953	0.00732468	0.00527048	0.0101648
Rapgef5	1072	0.0626638	0.136048	0.0248673	0.00879431	0.000642021
Sfrp1	1073	0.0635496	0.137893	0.0500358	-0.0861534	-0.229919
Pla2g12a	840	0.0644886	0.139852	0.049834	0.0413741	-0.0334001
Rph3al	1126	0.0653068	0.141547	-0.00408382	-0.00418242	0.0195927
Gpatch3	842	0.0653982	0.141666	0.00871771	0.00847722	-0.00111024
Wdr81	722	0.0654917	0.141761	0.00436772	0.00988086	0.00939701
Egfr	1127	0.0655156	0.141761	-0.0229765	-0.00814852	0.0360731
Ogfr	1076	0.0655743	0.141808	0.0467723	-0.0378566	-0.0641466
Nudt13	725	0.0659518	0.142544	0.00801855	0.0268265	-0.0164272
Tacstd2	1129	0.0664483	0.143537	0.00510878	-0.0111223	0.0170234
Map2k3os	1131	0.0668483	0.144321	-0.0214573	-0.0344093	0.00737591
Arl10	1132	0.0671311	0.14485	-0.00195641	-0.00643486	0.00719889
Sephs2	729	0.067283	0.145097	0.0221692	0.038857	-0.0833283
Gm17259	1134	0.0673586	0.145178	0.00330307	0.00266503	0.011805
Tox3	732	0.0677061	0.145846	-0.00726598	0.00987771	-0.0288359
Ppp1cc	1135	0.0681171	0.146649	-0.0303252	-0.277496	0.0798775
Fbxl15	734	0.0682393	0.146831	0.0202508	0.0231066	0.0056853
Mki67	1079	0.0683705	0.147031	0.0120254	-0.000698943	-0.697445
Gm11205	1138	0.0691227	0.148495	-0.00293428	-0.00204929	0.0123081
Mafk	1139	0.0691283	0.148495	-0.102979	-0.0990298	0.030317
Slc22a5	854	0.0702273	0.150772	0.00255605	0.00754267	0.010911
Bex2	779	0.0703733	0.151001	0.011431	0.0116817	-0.0437408
Tmem107	739	0.0706274	0.151462	0.00673981	0.0229618	-0.0954786
Stat1	1085	0.0707009	0.151536	0.0194139	-0.00910474	0.00578061
Zfp61	741	0.0711416	0.152396	0.00545193	0.0102422	-0.00394325
Gm20342	742	0.0713459	0.152726	-0.00186709	0.0112856	-0.00481575
Prpf40b	743	0.0713749	0.152726	0.0147232	0.0230015	0.0190062
Tirap	1143	0.0718545	0.153667	-0.0129396	-0.0972997	0.0294575
Arl4d	1144	0.0720199	0.153876	-0.03535	-0.00211501	0.00566167
Gm34961	1145	0.0720322	0.153876	-0.0029498	-0.00586093	0.00720555
Hdhd5	747	0.0724756	0.154738	0.0134025	0.0132497	0.0107523
Invs	749	0.0725702	0.154854	0.00620616	0.00775396	0.00587496
2810454H06Rik	751	0.0736967	0.157171	-0.00772079	0.00704153	-0.0079262
Hspa4	1136	0.0739608	0.157647	0.0561503	0.0068807	0.0564259
Mid1ip1	753	0.0740874	0.157829	0.00812552	0.0223993	-0.0263916
Slc16a6	1089	0.0746324	0.158903	0.0191133	0.000559374	0.013785
4932422M17Rik	754	0.0753074	0.160252	-0.0152293	0.00836191	-0.00543136
Arhgef39	756	0.0762684	0.162207	-0.00554316	0.00777249	-0.0728376
Letm2	870	0.0767027	0.163041	-0.00701311	0.0108053	0.00771577
Trim59	1091	0.0769103	0.163392	0.0167171	-0.00993694	-0.113166
Ly96	1092	0.077036	0.163569	0.0299937	-0.00480708	0.0234219
Asprv1	1094	0.0786414	0.166886	0.0172967	-0.00671599	0.00672669
Ints4	1096	0.079566	0.168755	0.0257107	0.0121328	-0.00430692
Cd27	760	0.0797181	0.168985	-0.0576526	0.0220928	-0.033496
Epb41l4aos	1156	0.0801434	0.169793	-0.153055	-0.064696	0.0596429
Arsk	1098	0.0802759	0.16998	0.0199774	0.00967604	0.0186348
Fam160b2	881	0.0803257	0.169993	-0.00230141	0.0107907	0.00231762
Nolc1	1100	0.0811154	0.17157	0.0399712	-0.0230834	-0.219408
Hs6st1	1158	0.0812102	0.171676	0.0134366	-0.0221998	0.0354443
Rab20	1160	0.081765	0.172754	-0.0540548	-0.0806453	0.0350214
Zfp995	825	0.0818195	0.172775	0.00854459	0.010508	0.0113928
AY036118	1161	0.0821447	0.173367	0.013467	-0.0139402	0.0656901
Prss36	765	0.0822252	0.173442	5.91959e-05	0.0175368	0.0175891
Dnajc16	888	0.0826699	0.174284	0.00970696	0.010704	0.00443323
1700084E18Rik	767	0.0828786	0.174629	-0.00492603	0.00876703	0.00969478
Spc25	1102	0.0830372	0.17485	0.0111673	-0.00989213	-0.502587
Fkbp9	1103	0.0830741	0.17485	0.0236912	-0.00120994	-0.0220624
Nek3	892	0.0838204	0.176324	0.0103269	0.00906896	0.00790804
Epg5	1164	0.0839046	0.176406	-0.000500059	0.00202188	0.0056079
Ripk4	1166	0.0841993	0.176928	-0.0166771	-0.0683589	0.033823
Mif	769	0.0844416	0.177316	-0.220223	0.059156	-0.38211
Cep95	770	0.0844758	0.177316	-0.00437496	0.0116604	0.00548351
Gm47533	1167	0.0853033	0.178956	-0.0154052	-0.0190801	0.00370621
Rabgef1	1168	0.0854422	0.17915	-0.0576932	-0.0647406	0.0356474
Tsc22d1	1106	0.0855802	0.179342	0.050696	-0.211121	-0.0694563
Sord	774	0.0860515	0.180232	-0.0235693	0.0221163	-0.010329
Sp4	1170	0.0864391	0.180945	-0.00308354	-0.00211518	0.00540903
Dhrs11	775	0.0865231	0.181023	0.000714371	0.0128488	0.00500288
Hsd11b1	1171	0.0867828	0.181468	-0.00468853	-0.00187863	0.00535345
Lockd	1108	0.0887353	0.18545	0.0172514	-0.0190136	-0.564021
Slfn9	904	0.089084	0.186078	0.0128105	0.00808304	-0.161657
Dnajb2	1172	0.0891642	0.186145	-0.0611146	-0.0689177	0.0437165
Thra	1173	0.0892282	0.186178	-0.0941238	0.00871237	0.0454667
Ube2s	1110	0.0900037	0.187694	0.0645006	-0.080707	-1.07276
Pnpla7	782	0.0901508	0.187899	-0.0145666	0.0146695	-0.0206225
B4galt4	1054	0.0902158	0.187933	0.0197869	0.0139871	0.0121092
C8g	1174	0.0907183	0.188825	0.00424365	0.00193127	0.00563992
Crebrf	1175	0.0907417	0.188825	-0.0449247	-0.00741248	0.02756
Rdm1	784	0.091163	0.189599	-0.103959	0.0372209	-0.00556038
Golga1	829	0.0915982	0.190402	0.0219762	0.025945	-0.0155651
Mkrn1	1176	0.0917456	0.190606	-0.167006	-0.0832575	0.0875471
Exph5	990	0.0918147	0.190646	-0.00535078	0.0105678	0.0202438
Hs3st3a1	1116	0.0922895	0.191499	0.00756781	0.00204434	-0.118885
Clint1	1117	0.0923272	0.191499	0.0600841	-0.00447532	0.0772745
Ugcg	1118	0.092374	0.191499	0.0217999	0.00204699	0.000749249
Apol7a	1159	0.0930325	0.19276	0.00908502	0.00354511	0.00981319
Cln8	1011	0.0932237	0.193053	0.0176997	0.0147817	0.0240484
Rock1	1120	0.0939072	0.194364	0.0474705	-0.0452278	-0.0610505
Vegfa	789	0.094469	0.195422	-0.0480307	0.0183089	0.00937534
Ilvbl	946	0.0952379	0.196907	0.0188896	0.0241217	0.0320337
Blnk	1121	0.0954378	0.197214	0.0207461	-0.00892641	-0.034282
Dok7	791	0.0956882	0.197626	0.00457916	0.00651129	0.00107136
Pclaf	1122	0.0958026	0.197756	0.0134457	-0.00694667	-1.08865
Kmt5b	1133	0.0973639	0.200764	0.00201278	0.0175974	0.0456485
Fndc3a	1239	0.0973446	0.200764	0.0349206	-0.167234	0.0543771
Per1	926	0.0978759	0.201712	-0.011	0.01503	0.0233417
Ggnbp1	799	0.0984715	0.202723	0.0142659	0.0285867	0.0140614
Hspa1a	1183	0.0984263	0.202723	-0.709447	-0.342285	0.133088
Lamb2	1184	0.0986088	0.202897	-0.0349308	-0.0382193	0.0519125
Traf3ip1	800	0.0996489	0.204928	0.0103952	0.0146364	-0.0419924
Gsto1	801	0.0997316	0.204989	-0.0206686	0.0325129	0.0206592
Stat2	1185	0.100953	0.207388	-0.0149225	-0.00710207	0.0227136
Unc5cl	1187	0.101477	0.208355	-0.00961454	-0.0351175	0.00991681
Slc25a26	1179	0.101589	0.208372	0.0205035	0.00320061	0.020153
Ndst1	1188	0.101593	0.208372	-0.0296372	-0.0852217	0.042249
Cnn3	1189	0.102332	0.209776	-0.036239	-0.436659	0.0707342
Cpeb4	1190	0.102429	0.209862	0.0123768	0.00909843	0.030957
Psme1	1129	0.10328	0.211494	0.0629884	-0.0898013	-0.0440772
Acsl3	1130	0.10341	0.211648	0.0240601	-0.00260784	-0.0741465
Man2b1	1132	0.103623	0.211971	0.0267189	0.00298309	0.00629088
Vwa5a	1192	0.104225	0.213089	-0.0449746	-0.0428246	0.0330595
Ccrl2	1193	0.104351	0.213234	-0.0502968	-0.0602664	0.0223293
Zfp984	808	0.105831	0.216144	-0.0126142	0.00703264	-0.000417751
Esf1	941	0.107797	0.220042	0.0336811	0.028946	-0.222113
Tmco3	1137	0.108017	0.220375	0.0295593	-0.00858827	0.0247026
Lama4	1138	0.108571	0.221388	0.0277678	-0.0340069	-0.0252147
Surf1	811	0.108666	0.221466	-0.0126805	0.0411893	0.0265926
Eif4e3	1195	0.109351	0.222744	0.0147153	-0.0153303	0.0146858
Arhgap10	1140	0.110106	0.224163	0.0250301	-0.0384875	-0.0588406
Farp2	1197	0.110623	0.225098	-0.0132944	-0.00511201	0.0108503
A930015D03Rik	965	0.111283	0.22632	0.0122667	0.00954201	0.00641557
Ubxn4	1245	0.11149	0.226622	0.0469468	-0.129952	0.11212
Pced1b	1198	0.11281	0.229183	0.00347832	-0.0040779	0.0072167
Csrnp1	1201	0.1134	0.230262	-0.0583462	-0.0269052	0.0258841
Dusp5	1203	0.114859	0.233101	-0.0490535	-0.0190816	0.0281314
Gm12216	1205	0.11566	0.234604	0.000996353	0.00285809	0.0164229
Nfil3	1206	0.115886	0.234939	-0.0342328	-0.167914	0.0341024
Atp2c1	1207	0.116293	0.23564	-0.00138977	0.00892148	0.0421556
Zscan26	820	0.116506	0.235947	-0.0152846	0.0207541	-0.00506347
Gm34006	1077	0.116608	0.235954	0.02447	0.0171071	0.0203175
Tspyl2	1107	0.116632	0.235954	0.00217977	0.0067555	0.0119712
C1ra	1266	0.116818	0.236206	0.00557397	0.00152459	0.00545476
Gm15446	821	0.117004	0.236459	-0.000388336	0.0122317	-0.0184608
Psmd11	1146	0.117111	0.236553	0.0571585	-0.139541	-0.141501
Piga	823	0.117924	0.238069	0.00859973	0.0126047	-0.017424
1700018L02Rik	964	0.118263	0.238628	-0.00385868	0.00781895	0.0104218
Hmmr	824	0.118827	0.239431	0.0011576	0.00453482	-0.504728
Dnajc8	1150	0.118765	0.239431	0.0490355	0.00819948	-0.177445
Sp3os	1151	0.118854	0.239431	0.0350995	-0.0230888	-0.0333988
Stmn1	1152	0.118909	0.239431	0.0405323	-0.0218372	-1.36015
Mif4gd	1211	0.119351	0.240196	-0.00371219	-0.0101929	0.059099
Tmprss2	1212	0.119459	0.240289	-0.00469291	-0.0162377	0.0296515
Sgk1	1213	0.119653	0.240553	-0.0328361	-0.0512502	0.0663125
Dpy19l1	826	0.119798	0.24072	0.0051363	0.00813158	-0.0202743
Wnk2	1059	0.119895	0.240788	-0.00497252	0.0182606	0.0372001
Mdrl	1153	0.120805	0.24249	0.00927759	0.00456444	-0.00609104
Vps13d	1215	0.120916	0.242586	-0.0112985	0.000309071	0.02344
Cldn3	1217	0.121711	0.244055	-0.0284435	-0.399945	0.0913385
Cenpf	1155	0.121902	0.244311	0.00788567	-0.00771554	-0.64006
Airn	1226	0.122789	0.24596	0.0252037	0.00595745	0.0317542
Ccdc186	1220	0.123076	0.246407	-0.0230484	-0.0920116	0.0525315
Brwd3	1221	0.123409	0.246947	-0.00355787	-0.0297691	0.0172948
Abcc10	869	0.123563	0.247126	-0.00357519	0.00827875	0.000531754
Kank2	957	0.123757	0.247386	0.00756897	0.00962625	0.0118595
Sema4b	1222	0.123989	0.247722	-0.0160164	-0.0129322	0.0273627
Ankra2	833	0.124237	0.248088	-0.00730052	0.0192495	-0.0220493
Oasl2	1223	0.124392	0.24827	0.00385052	-0.0229492	0.00489764
Ccdc173	980	0.124639	0.248633	0.0168638	0.0143281	-0.016235
Zfp692	1138	0.125146	0.249516	0.0214629	0.0114403	-0.00684003
Nrbp2	1162	0.125487	0.250067	0.0377725	0.00942467	0.0463366
Tuba1a	1163	0.125787	0.250535	0.0445545	-0.481591	-0.273148
BC022687	1266	0.126422	0.25167	0.0105866	0.00533702	0.014876
Poc5	837	0.126586	0.251866	-0.00275492	0.0112382	-0.00791721
Ribc1	1225	0.126674	0.251911	-0.00544145	-0.000181368	0.00929555
Mis18bp1	838	0.127076	0.252581	0.00258226	0.0046081	-0.133499
Tsacc	987	0.127931	0.25415	-0.00900967	0.0121125	0.0209867
AW554918	839	0.128157	0.254468	0.0033491	0.0107119	0.00145031
Lpin1	1295	0.128273	0.254567	0.0209957	-0.000716374	0.0179725
Arrdc2	984	0.128862	0.255302	0.00287854	0.00673353	0.00918851
Gramd4	1165	0.128784	0.255302	0.0182533	0.00307792	0.0167471
Selenom	1166	0.128831	0.255302	0.0427891	0.0150528	0.0347366
Pnck	1167	0.128908	0.255302	0.0096996	0.00138126	-0.0120264
Gm34552	1099	0.129703	0.256623	0.00667758	0.00563691	0.00183916
Esyt3	1228	0.129708	0.256623	-0.044742	-0.0323624	0.0175873
Nrarp	841	0.129946	0.256961	0.00136389	0.00646436	-0.058205
Zfp608	1229	0.130019	0.256975	0.00158228	-0.00762013	0.0170653
Zswim7	843	0.130868	0.258288	0.00803579	0.0163961	0.00660183
Eps8l1	1230	0.130869	0.258288	-0.0212092	-0.011287	0.016735
Gbp7	1231	0.130885	0.258288	-0.00417871	-0.0738383	0.0201435
Ltf	1169	0.13096	0.258304	0.0341714	0.00129833	-0.0364865
Bcar1	1233	0.131384	0.259007	-0.0434498	-0.125263	0.0524819
Dusp3	1170	0.132408	0.260857	0.0335061	-0.0496487	-0.00857716
Isg15	1234	0.132457	0.260857	-0.00105272	-0.0507977	0.0139355
1810032O08Rik	846	0.134092	0.263943	0.00183048	0.0131037	-0.00666701
Zc3h13	848	0.13478	0.265027	-0.00290302	0.0277271	-0.0989713
Glt8d1	1174	0.134715	0.265027	0.0210358	0.00567097	0.00680176
Usp54	857	0.136164	0.267611	0.000915224	0.00857966	0.00962107
Tm4sf1	1236	0.13626	0.267664	-0.340298	-0.903894	0.129518
Dgkz	1237	0.138447	0.271822	-0.0685478	-0.0149236	0.0638127
Tmem57	1181	0.139881	0.274489	0.0357438	-0.0308292	-0.0145504
Ifi27l2a	1182	0.139948	0.274489	0.0364915	-0.0196778	0.000810774
Sp100	1238	0.140386	0.275207	-0.0147343	-0.00329215	0.0071085
Polr3g	1012	0.14085	0.275874	0.0091881	0.0079393	0.00395309
Ulk1	1241	0.140869	0.275874	-0.0465403	-0.0552402	0.0405271
Cpne2	1184	0.141072	0.276132	0.0173763	-0.00342468	-0.00930788
Ncoa2	1013	0.141178	0.2762	0.00190495	0.0158618	0.0267229
Dnaic1	1235	0.141459	0.276608	0.0102439	0.00321289	0.0121621
St14	1242	0.141759	0.277055	-0.155826	-0.167953	0.0561406
D730045B01Rik	856	0.142099	0.277578	0.000757287	0.00677028	0.00211593
Gm15420	1245	0.142559	0.278336	-0.00399409	-0.00205031	0.0115226
Wdr60	1188	0.143386	0.279669	0.0181494	0.00693053	-0.0334731
Rgs11	1216	0.143381	0.279669	-0.0308952	0.00811974	0.0228224
Hist2h2aa1	1023	0.144042	0.280664	-0.00245581	0.0124964	0.0202945
Mzt2	1248	0.144024	0.280664	0.00707834	-0.00278077	0.0430919
Elmsan1	1249	0.144901	0.282195	-0.00713585	-0.00213828	0.00815644
Slf1	859	0.146006	0.284203	0.00614871	0.00674411	-0.0625363
Mettl4	860	0.147202	0.286386	0.00683991	0.00829859	0.00522402
Cd44	1195	0.147537	0.286893	0.0259611	-0.0209948	0.0266639
Clk1	1253	0.148096	0.287836	-0.153371	-0.0835079	0.0496149
Sdr16c5	1196	0.148396	0.288274	0.00768938	-0.0157171	-0.0380444
P3h1	1254	0.149153	0.289599	0.00781322	0.000268282	0.0102332
Fbln2	1255	0.149264	0.289668	-0.0353437	-0.0860746	0.0363298
Mob3c	1256	0.149698	0.290364	-0.0297726	-0.00320077	0.0165724
Usp18	868	0.151202	0.293134	0.0139615	0.0169888	0.0123981
Ccdc88a	1198	0.152196	0.294914	0.0310703	-0.0313657	-0.200993
AC140304.2	1199	0.152492	0.295339	0.00645947	0.00296028	-0.000535714
Ogfod3	1200	0.154156	0.298412	0.0221144	-0.00143241	-0.0756535
Eno1b	872	0.15446	0.29885	-0.00853292	0.0155085	0.0052116
Fes	1202	0.154573	0.298919	0.00945713	0.000965116	-0.00273572
Frmd4a	873	0.155389	0.300297	0.00574282	0.00859229	0.00868505
Gbp2	1258	0.155442	0.300297	-0.0873906	-0.142999	0.0214873
Chd9	874	0.155658	0.300544	-0.0108826	0.0251836	0.0296001
Tax1bp3	1203	0.155725	0.300544	0.048612	-0.161234	-2.43382e-05
[truncated: 1,859 more rows]

## Sheet: 4-proliferating
	Top	p.value	FDR	logFC.1	logFC.2	logFC.3
Hint1	1	1.12629e-90	4.34524e-87	1.34714	1.26786	1.30193
H2afz	2	1.22125e-81	2.35579e-78	2.16127	1.97984	2.01548
Nme1	3	2.91471e-73	3.74832e-70	1.1717	0.270473	0.334458
Ran	3	3.47759e-69	3.35414e-66	1.48177	1.13042	1.27105
Ccdc34	3	2.73307e-62	2.10884e-59	1.11528	1.06079	0.990446
Stmn1	4	2.13267e-56	1.02848e-53	1.4155	1.33691	1.36015
Hsp90aa1	4	2.91186e-55	1.02127e-52	0.483117	0.486823	1.01128
1110008P14Rik	6	2.25722e-60	1.45139e-57	0.9643	0.0170681	0.159962
Tuba1b	6	1.82308e-55	7.81494e-53	1.75683	1.46009	1.61506
Uqcrq	7	9.41504e-57	5.18903e-54	0.806577	0.289009	0.303013
Pclaf	7	6.07542e-44	9.01499e-42	1.10659	1.0781	1.08865
H2afv	8	2.24392e-46	4.1224e-44	0.901301	0.833131	0.911415
Selenoh	8	3.70435e-41	3.86254e-39	0.641378	0.661623	0.634614
Tyms	9	3.16123e-46	5.54365e-44	0.945167	0.864756	0.871593
Hnrnpa3	10	2.75822e-55	1.02127e-52	0.911704	0.630726	0.636826
Ube2s	10	1.56753e-41	1.76181e-39	1.07195	0.961645	1.07276
Col9a1	11	8.41755e-55	2.70624e-52	0.967375	-0.408481	-0.345825
Pbk	11	2.30032e-48	5.54664e-46	1.40775	1.2339	1.17124
Ranbp1	12	2.53215e-50	7.51464e-48	1.08524	0.865213	0.871765
Hnrnpab	12	7.82816e-49	2.0134e-46	0.916717	0.597538	0.739115
Dynll1	13	4.78321e-49	1.31812e-46	1.09483	0.539533	0.673666
Hmgn2	13	1.23663e-44	1.90837e-42	0.970067	0.852247	0.838629
Tubb5	13	1.34345e-43	1.85108e-41	1.63585	1.23105	1.50367
Cdca8	14	1.12955e-36	8.54474e-35	0.861108	0.852195	0.858093
Set	15	3.15146e-38	2.64312e-36	0.68257	0.502162	0.626369
Birc5	15	1.32219e-37	1.04102e-35	1.01062	0.979974	0.992442
Phgdh	16	1.00672e-47	2.28465e-45	0.682227	0.419905	0.422056
Snrpd1	16	1.59832e-41	1.76181e-39	0.858556	0.730846	0.705188
Tagln2	16	4.72748e-38	3.79971e-36	0.821288	0.412914	0.855422
Pdap1	17	3.73776e-47	8.01127e-45	0.745741	0.431665	0.403611
Cenpw	17	3.66229e-39	3.36408e-37	0.716752	0.667897	0.679389
Dtymk	18	6.61756e-47	1.34371e-44	0.863699	0.618038	0.609981
Nucks1	18	1.9605e-41	2.101e-39	0.907186	0.806794	0.757799
Snrpg	19	9.64098e-47	1.85975e-44	0.700381	0.509126	0.52443
Pmf1	19	2.64902e-39	2.49266e-37	0.647274	0.599022	0.571812
Dut	20	1.30103e-35	9.29513e-34	0.870099	0.833907	0.76309
Jpt1	21	3.0624e-45	5.13684e-43	0.924979	0.667695	0.722934
Mrpl57	22	4.83447e-45	7.77141e-43	0.670316	0.386716	0.261342
Spc24	22	1.89252e-38	1.69799e-36	0.7155	0.664531	0.682358
Cenpm	22	5.20573e-36	3.78938e-34	0.582139	0.560425	0.558223
Dek	23	7.52135e-35	5.18167e-33	0.770866	0.744332	0.809256
Dnajc9	24	2.36971e-33	1.47457e-31	0.594817	0.592178	0.556743
Hnrnpa2b1	26	8.87787e-44	1.26855e-41	0.888794	0.442549	0.431547
Dynlt1f	26	2.14566e-40	2.12255e-38	0.713061	0.615891	0.595974
Smc2	27	3.64776e-32	2.03958e-30	0.725873	0.721663	0.707492
Cycs	28	1.72472e-43	2.29447e-41	0.882564	0.483497	0.638301
Hmgb2	28	1.26406e-32	7.27875e-31	1.01787	1.10691	1.12701
2610524H06Rik	29	1.17034e-42	1.50506e-40	0.633185	0.40027	0.396735
Ssb	29	2.02101e-37	1.55941e-35	0.667092	0.536538	0.475737
Ccnd1	30	6.85708e-42	8.53375e-40	0.968504	0.338346	0.238849
Cks2	30	1.44544e-32	8.20075e-31	0.883555	0.831586	0.874072
Slc25a5	31	8.30143e-42	1.00084e-39	0.955618	0.15368	0.183773
Smc4	31	1.28569e-31	6.70295e-30	0.813697	0.791818	0.79824
Abcg2	32	1.59741e-41	1.76181e-39	0.753795	0.1686	0.205106
Tk1	32	1.03095e-32	6.11908e-31	0.698504	0.668912	0.638933
Tnfrsf12a	32	9.94633e-32	5.32958e-30	0.27605	-0.45776	0.917246
Cdca3	33	1.22431e-32	7.15665e-31	0.681028	0.655125	0.651355
Mki67	34	1.23905e-31	6.5483e-30	0.715892	0.69852	0.697445
Tmem37	35	6.17988e-41	6.2742e-39	0.829271	0.400005	0.157126
Dctpp1	35	5.8933e-40	5.68409e-38	0.854254	0.695696	0.687009
Anp32b	35	3.06222e-35	2.14801e-33	1.00798	0.573673	0.859597
Cdk1	37	1.63365e-30	8.08027e-29	0.887458	0.871315	0.854558
Syce2	38	7.57757e-30	3.39933e-28	0.421737	0.46667	0.469855
Tsen34	40	1.58504e-29	6.94895e-28	0.620667	0.617584	0.562762
Cks1b	41	2.05031e-38	1.79775e-36	0.713112	0.534272	0.518196
Rrm2	41	6.81964e-30	3.13216e-28	0.766706	0.757487	0.753184
Lsm2	42	7.43462e-29	3.11769e-27	0.517416	0.534504	0.487953
Tmsb10	43	2.63147e-38	2.25605e-36	0.814099	0.137491	0.570039
Nrm	43	5.81969e-31	2.95426e-29	0.466785	0.434967	0.45406
Cenpx	44	3.77294e-38	3.09702e-36	0.660179	0.308878	0.243527
Lockd	44	1.94368e-31	9.99828e-30	0.591453	0.542972	0.564021
Hnrnpu	46	4.5998e-29	1.95011e-27	0.315135	0.317092	0.520642
Ccnb2	47	7.39249e-30	3.35532e-28	0.752362	0.719599	0.733344
Tspan13	49	1.36872e-36	1.01548e-34	0.697743	0.182171	0.159831
Knstrn	50	1.47358e-28	6.04793e-27	0.559016	0.544045	0.552169
Gins2	51	1.40787e-27	5.32504e-26	0.512102	0.490958	0.486638
S100a10	52	4.04044e-28	1.59061e-26	0.276597	-0.178024	0.67392
Mad2l1	52	1.70748e-27	6.27378e-26	0.409487	0.402119	0.40779
Hat1	53	2.39858e-26	8.33668e-25	0.532824	0.525685	0.534325
Uqcc2	54	1.59244e-34	1.07783e-32	0.611288	0.227012	0.227644
Rangap1	54	1.17622e-27	4.49292e-26	0.349112	0.28014	0.413932
Rrm1	54	1.52121e-27	5.64311e-26	0.463649	0.449282	0.429013
Fdps	55	1.63144e-34	1.08519e-32	0.715389	0.320496	0.293359
Tacc3	55	8.97946e-27	3.20766e-25	0.402215	0.399682	0.405225
Psmb3	56	2.27968e-34	1.49068e-32	0.608276	0.187759	0.208367
Pcna	56	2.82277e-26	9.72342e-25	0.717289	0.697389	0.687492
Hspe1	57	3.51367e-34	2.25929e-32	0.707427	0.427416	0.463946
Ccna2	57	4.42375e-26	1.49709e-24	0.519698	0.519511	0.524511
Pttg1	58	1.07014e-26	3.78772e-25	0.70512	0.688814	0.710195
Cenpa	58	6.68344e-26	2.20382e-24	0.769035	0.760671	0.762899
Hnrnpa1	59	1.69921e-33	1.07468e-31	0.724536	0.222424	0.341687
Erp29	60	4.96818e-33	3.04242e-31	0.586944	0.125578	0.0713449
Cdk4	61	8.80926e-33	5.31033e-31	0.696568	0.479298	0.498657
Mrpl18	61	8.33736e-30	3.69719e-28	0.599192	0.507499	0.314008
Lyar	62	5.39733e-26	1.80073e-24	0.541627	0.398684	0.508248
Lsm3	63	4.43128e-24	1.33562e-22	0.399375	0.402846	0.385496
Ndufaf2	64	5.75706e-28	2.24351e-26	0.479398	0.432917	0.413127
Rfc5	65	7.17691e-28	2.76885e-26	0.459475	0.415562	0.400417
Srsf2	65	1.13244e-25	3.7025e-24	0.363976	0.374862	0.507743
Lig1	66	8.23544e-25	2.58312e-23	0.617531	0.607892	0.61213
Nhp2	67	4.56703e-32	2.51709e-30	0.656742	0.349458	0.507544
Rfc3	67	5.74033e-24	1.69055e-22	0.382268	0.385511	0.361365
Tmem216	68	6.42611e-32	3.49182e-30	0.721257	0.24336	-0.00297849
H1fx	68	4.79731e-25	1.52959e-23	0.465086	0.454321	0.471337
Hmmr	68	5.8995e-24	1.72426e-22	0.505331	0.510186	0.504728
Tpx2	69	2.30998e-24	7.01724e-23	0.452388	0.452542	0.45131
Rfc2	70	2.29849e-28	9.33429e-27	0.568166	0.503981	0.488646
Tubb4b	70	7.28061e-25	2.30234e-23	0.837662	0.682948	0.928559
Hdgf	71	1.89405e-24	5.79939e-23	0.545902	0.360326	0.532644
Cenpf	72	4.6112e-24	1.37907e-22	0.648183	0.632677	0.64006
Racgap1	73	4.2075e-23	1.15124e-21	0.445885	0.445908	0.443247
Banf1	74	9.0147e-31	4.51672e-29	0.611242	0.444045	0.415993
Dhfr	74	3.33198e-23	9.31507e-22	0.372903	0.365125	0.347962
Top2a	75	1.65175e-22	4.30572e-21	0.637603	0.631258	0.638522
Fblim1	76	1.95763e-30	9.56015e-29	0.685694	0.106553	-0.222111
Cldn7	76	8.95813e-24	2.57914e-22	0.376753	-0.338363	0.638317
Cdkn3	76	3.68874e-23	1.02382e-21	0.506485	0.490171	0.501402
Anapc5	77	2.27832e-30	1.09872e-28	0.594251	0.348648	0.424847
Mrps28	78	4.1864e-30	1.99397e-28	0.486318	0.222423	0.186546
Ckap2l	78	1.10973e-21	2.70972e-20	0.400009	0.410985	0.411809
Sae1	79	4.54739e-30	2.13949e-28	0.585249	0.456701	0.396389
Rad21	79	1.46572e-23	4.1579e-22	0.377843	0.352585	0.384576
Ube2c	79	2.34794e-22	6.03891e-21	0.820246	0.797603	0.797549
Lsm4	80	4.95861e-30	2.30486e-28	0.613048	0.271716	0.210192
Mcm5	80	4.6803e-25	1.50472e-23	0.407699	0.372525	0.371516
Mcm7	81	1.28514e-21	3.07954e-20	0.393397	0.391078	0.396301
Exosc8	82	3.77768e-21	8.72712e-20	0.287944	0.322702	0.291821
Fkbp2	84	2.91535e-29	1.26376e-27	0.578359	0.0949429	0.102785
Tmpo	84	8.86489e-23	2.37505e-21	0.354353	0.44117	0.502165
Ostc	85	4.3804e-29	1.87773e-27	0.588997	0.00777765	-0.0600707
Gmnn	85	7.15057e-21	1.62276e-19	0.416198	0.412023	0.404819
Uchl3	86	9.83507e-29	4.07997e-27	0.553425	0.247616	0.364975
Prim1	86	1.29279e-20	2.85004e-19	0.333505	0.331313	0.319396
Lmna	87	1.18786e-22	3.13889e-21	0.247492	-0.0718015	0.652914
Diaph3	87	7.25199e-21	1.63615e-19	0.276832	0.275415	0.274554
Ywhah	88	1.54728e-22	4.06081e-21	0.388951	0.123157	0.508962
Spc25	88	1.68547e-22	4.36411e-21	0.515618	0.490011	0.502587
Car2	89	2.83403e-28	1.13893e-26	0.892445	0.358503	0.41404
Haus4	89	1.79362e-20	3.88753e-19	0.306118	0.324945	0.304672
Srsf3	90	3.00209e-28	1.19403e-26	0.774312	0.562011	0.490694
Pradc1	93	3.35676e-21	7.80144e-20	0.432741	0.396781	0.300961
Nes	94	1.45862e-27	5.46346e-26	0.612306	0.103809	0.388985
Eif2s2	94	1.22332e-21	2.94973e-20	0.292392	0.123051	0.400434
Rfc4	94	1.06722e-19	2.19008e-18	0.34875	0.348758	0.327628
Ccnb1	96	1.17523e-19	2.38633e-18	0.370292	0.368978	0.369141
Npnt	97	3.93852e-27	1.43347e-25	0.611259	-0.229451	-0.388114
Tpi1	97	3.97747e-19	7.78939e-18	0.0748107	0.469181	0.334061
Cisd1	98	8.67142e-27	3.12657e-25	0.541272	0.263645	0.0777736
Nap1l1	98	4.877e-23	1.32503e-21	0.619612	0.460785	0.561233
Sumo3	99	1.41836e-26	4.97458e-25	0.593124	0.296623	0.0688817
Tcf19	100	4.33979e-21	9.96601e-20	0.432131	0.409815	0.411855
Cenph	101	6.47775e-21	1.47877e-19	0.327427	0.312613	0.319232
Mcm6	102	8.97641e-22	2.2058e-20	0.493185	0.457916	0.455003
Rbm3	103	4.37782e-26	1.49466e-24	0.783015	0.188561	0.266515
Cdc20	103	5.84934e-19	1.13401e-17	0.497044	0.488028	0.487196
Siva1	104	2.90837e-18	5.42054e-17	0.479478	0.479147	0.418546
Nop56	105	2.60732e-20	5.55748e-19	0.389871	0.352279	0.422854
Slc29a1	106	5.41433e-26	1.80073e-24	0.741257	-0.0721792	-0.40654
Gltp	107	2.53176e-21	5.91972e-20	0.344582	0.304724	0.301353
Fubp1	108	7.31075e-20	1.53287e-18	0.335812	0.238464	0.390111
Tipin	108	9.67601e-18	1.76085e-16	0.38697	0.376335	0.346724
Hmgn5	109	3.97184e-25	1.28768e-23	0.538968	0.407865	0.379339
Hells	110	1.55538e-19	3.12534e-18	0.356518	0.33471	0.329142
Uhrf1	111	3.71542e-19	7.31332e-18	0.321414	0.309215	0.305723
Pglyrp1	112	7.1956e-22	1.79101e-20	0.834098	0.696051	0.801042
Rnaseh2c	112	3.40635e-20	7.18125e-19	0.496364	0.439377	0.42628
Hsp90b1	113	1.21808e-24	3.78979e-23	0.737857	0.0343385	0.0458149
Nasp	113	2.66332e-19	5.26928e-18	0.355138	0.367312	0.388054
Nusap1	113	1.37831e-17	2.47327e-16	0.442538	0.440131	0.441173
Ddx39b	114	1.41587e-24	4.36994e-23	0.509718	0.358814	0.324719
Prc1	114	2.15662e-18	4.05864e-17	0.418875	0.415454	0.432615
Mcm3	115	2.44164e-18	4.57274e-17	0.324796	0.304194	0.296456
Cnih4	116	3.07401e-20	6.51622e-19	0.470686	0.169122	0.423157
Cdkn1a	117	6.4969e-19	1.2465e-17	0.237909	0.374175	0.575888
Mif	117	1.59206e-16	2.7058e-15	0.0447291	0.447931	0.38211
Timm10b	118	5.0238e-24	1.49091e-22	0.486638	0.106207	-0.00248675
Ywhag	118	6.52653e-19	1.2465e-17	0.198145	0.00212653	0.366047
Fam111a	118	2.44955e-17	4.31523e-16	0.292857	0.283037	0.282498
Limch1	119	7.78451e-24	2.25809e-22	0.363658	0.136998	0.127439
C330027C09Rik	119	1.12586e-16	1.93048e-15	0.242761	0.240723	0.24077
Tpm4	120	1.66265e-18	3.15985e-17	0.275285	0.161168	0.3992
Hist1h2ap	121	3.22805e-17	5.66082e-16	0.603721	0.58531	0.597153
Shf	122	1.15686e-23	3.30605e-22	0.690558	0.184231	-0.387169
Sfpq	122	1.98151e-18	3.74739e-17	0.329856	0.224208	0.377743
Cpe	123	1.31927e-16	2.2521e-15	0.398937	0.431407	0.440818
Rwdd1	125	1.99035e-23	5.60495e-22	0.57599	0.177329	0.199918
Sox4	125	8.01481e-18	1.47948e-16	0.457239	-0.331781	0.633369
Clspn	125	4.21758e-16	6.924e-15	0.243564	0.242769	0.244603
Rfc1	126	1.5218e-15	2.42607e-14	0.321711	0.314182	0.182451
Idh3a	128	4.15363e-23	1.14462e-21	0.522842	0.220523	0.192108
Aurkb	128	8.09711e-16	1.30706e-14	0.25365	0.252207	0.252148
Higd1a	129	1.91836e-17	3.41062e-16	0.122158	0.36568	0.475536
Smdt1	130	4.97513e-23	1.34224e-21	0.461749	0.00961936	-0.00638634
Srsf6	131	2.57147e-15	3.95248e-14	0.377849	0.368857	0.339285
Dhrs4	132	1.0673e-22	2.83975e-21	0.44359	0.130886	0.088953
Mcm2	132	1.60664e-15	2.55079e-14	0.27476	0.264491	0.260913
Crip1	133	9.43555e-18	1.72523e-16	0.84221	0.780323	0.831548
Cdc25c	134	1.49586e-15	2.39462e-14	0.224498	0.221535	0.221035
Fkbp3	135	2.43385e-21	5.72549e-20	0.491129	0.360749	0.33427
Fen1	135	1.2146e-17	2.19997e-16	0.332429	0.2892	0.314447
Akap12	136	2.38446e-22	6.09223e-21	0.451938	0.307606	0.139644
Srsf7	136	5.3309e-17	9.26423e-16	0.356306	0.226002	0.412091
Pgam1	136	6.9577e-15	1.02453e-13	0.247075	0.356292	0.260174
Esco2	137	3.3634e-15	5.08863e-14	0.249734	0.248265	0.244869
Gapdh	138	9.73386e-17	1.67648e-15	0.522627	0.568657	0.677075
Anln	138	5.14715e-15	7.69679e-14	0.186483	0.188702	0.188263
Wfdc18	139	5.1857e-22	1.31621e-20	1.1376	-0.705802	-0.487198
Slc25a39	140	6.1425e-22	1.54887e-20	0.475669	0.0158477	0.119338
Rpa2	140	1.77927e-17	3.17798e-16	0.441632	0.390079	0.361001
Ppa1	141	6.57304e-22	1.64667e-20	0.416608	0.0919255	0.194171
Cenpe	142	4.34775e-15	6.5267e-14	0.261217	0.257709	0.262702
Cdk2ap1	143	8.40001e-22	2.07739e-20	0.422508	0.216997	0.193829
Bola3	145	1.14075e-21	2.76793e-20	0.428393	0.20643	0.147828
Cbx3	145	2.57963e-14	3.69971e-13	0.300616	0.352303	0.29428
Col11a1	147	1.42592e-21	3.39581e-20	0.853847	0.493463	0.611174
Chaf1b	147	4.53518e-14	6.20452e-13	0.276805	0.271998	0.268988
Tmem238	148	1.87387e-21	4.43522e-20	0.450148	0.131456	0.0686619
Psrc1	148	5.47179e-14	7.40708e-13	0.183055	0.19522	0.187076
Smarca5	149	1.64537e-15	2.59657e-14	0.272447	0.231557	0.348696
Ncapg	149	2.01619e-14	2.91328e-13	0.182367	0.180901	0.182516
Luc7l3	150	1.65219e-15	2.59657e-14	0.207971	0.190471	0.319676
Plk1	150	1.5794e-14	2.30807e-13	0.201818	0.199763	0.202418
Top1	151	2.20096e-15	3.43037e-14	0.133945	-0.358801	0.482509
Cacybp	151	3.46235e-14	4.83976e-13	0.359377	0.324393	0.313796
Psip1	152	2.20511e-15	3.43037e-14	0.239391	0.290668	0.306845
E2f1	152	3.9945e-15	6.01983e-14	0.299431	0.285945	0.28205
Pdia6	154	8.85876e-21	1.98704e-19	0.62233	-0.245925	-0.229217
Ckap2	154	3.46229e-14	4.83976e-13	0.257867	0.255218	0.255533
Psma4	155	1.0255e-20	2.28692e-19	0.513364	0.151526	-0.00251352
Vim	155	3.32154e-16	5.52349e-15	0.477307	0.435811	0.451297
Rtf1	156	3.20692e-15	4.89023e-14	0.175221	0.183883	0.287013
Kif23	156	1.41344e-13	1.84225e-12	0.177392	0.181864	0.181991
Sec61g	157	1.1667e-20	2.58687e-19	0.487034	-0.0546277	-0.0311487
Rnaseh2a	157	5.49737e-16	8.9868e-15	0.339964	0.298193	0.26478
Hspd1	157	3.34234e-15	5.07667e-14	0.401184	0.283479	0.372676
Dazap1	159	1.47757e-20	3.23891e-19	0.397504	0.262662	0.295658
Rbm17	159	7.78096e-15	1.1414e-13	0.221714	0.263239	0.282017
Fkbp11	160	1.79015e-20	3.88753e-19	0.797986	-0.391199	-0.420931
Kif20b	160	4.90214e-13	6.18054e-12	0.183975	0.189164	0.187418
Bax	161	2.11485e-20	4.55815e-19	0.403969	0.276263	0.263412
Dlgap5	161	3.90659e-13	5.00718e-12	0.184683	0.186834	0.18772
Manf	162	2.45804e-20	5.2684e-19	0.822696	-0.0845621	-0.0469504
Aurka	163	4.23707e-13	5.39492e-12	0.204973	0.201277	0.202006
Fus	164	4.81468e-14	6.5405e-13	0.342239	0.363184	0.399117
Dtl	166	3.19185e-14	4.52726e-13	0.239572	0.223282	0.228068
Mlf1	166	3.40667e-14	4.7967e-13	0.135309	0.117895	0.174414
Ddah1	167	7.95473e-20	1.65888e-18	0.349655	0.100433	0.0892044
Zc3h15	167	3.78109e-14	5.24728e-13	0.324169	0.260773	0.343723
Idh2	167	2.276e-12	2.70178e-11	0.344212	0.310895	0.314127
Hacd1	168	8.10224e-20	1.68056e-18	0.313426	0.218564	0.245224
Cyba	169	4.30481e-14	5.93142e-13	0.28237	0.311073	0.346595
Prdx4	170	9.4514e-20	1.94992e-18	0.581489	0.278184	0.321877
Slc35b1	171	1.17416e-19	2.38633e-18	0.375449	0.0473889	0.0551846
Ezh2	171	3.31071e-14	4.67865e-13	0.310956	0.240817	0.307224
Pmp22	172	1.55642e-12	1.89422e-11	0.212866	0.197077	0.208828
Emb	173	1.27358e-19	2.57251e-18	0.455706	0.325861	0.338494
Incenp	173	5.35711e-12	6.07875e-11	0.178549	0.180438	0.175642
Ada	175	1.63182e-19	3.26195e-18	0.316695	0.0947488	0.13604
Hnrnpm	176	3.34235e-18	6.19942e-17	0.420939	0.307458	0.324546
Ppm1g	176	8.56176e-14	1.15092e-12	0.26419	0.277552	0.307107
Cmas	177	2.15459e-19	4.28474e-18	0.603613	-0.0500705	-0.268871
Slfn9	178	1.81983e-11	2.0175e-10	0.18097	0.179555	0.161657
Impa2	179	5.58325e-19	1.08789e-17	0.412324	0.270706	0.190761
Rbm25	179	1.07777e-13	1.42888e-12	0.317508	0.178238	0.34249
Tpr	180	1.33341e-13	1.74976e-12	0.246505	0.237425	0.267879
Tceal9	181	6.06496e-19	1.16993e-17	0.566046	0.0913623	0.24854
Fam162a	182	3.22936e-11	3.49968e-10	0.046537	0.349356	0.252173
Nek2	183	1.30993e-11	1.46911e-10	0.15687	0.155764	0.155739
Ak2	184	3.94038e-16	6.49657e-15	0.401868	0.147415	0.31462
Sec13	185	8.08907e-18	1.48608e-16	0.340259	0.0239753	0.0483832
Larp7	185	4.30168e-13	5.45918e-12	0.180804	0.220956	0.245377
Rell1	186	5.11614e-13	6.42934e-12	0.244027	0.181589	0.236919
Eif1ad	187	5.55922e-13	6.96347e-12	0.229954	0.228523	0.249715
Hnrnph1	189	6.60641e-13	8.16908e-12	0.22813	0.166182	0.249684
H2afx	189	5.85588e-11	6.22369e-10	0.297526	0.298504	0.269575
Slc35b2	190	1.36051e-17	2.45273e-16	0.389717	0.177017	0.0487173
Bex3	190	3.44558e-16	5.70516e-15	0.477939	0.349425	0.388334
Ppp1r14b	190	3.08324e-14	4.38935e-13	0.350461	0.12443	0.296778
Lmnb1	191	1.70459e-12	2.04869e-11	0.2008	0.195146	0.207695
Ptms	193	8.91434e-13	1.09179e-11	0.197368	0.250205	0.337299
Pdia3	194	2.31101e-17	4.08986e-16	0.506332	-0.0923275	-0.0560313
Pimreg	194	2.81733e-11	3.07041e-10	0.146887	0.145541	0.145468
Mis18bp1	195	1.24585e-10	1.28515e-09	0.137534	0.139543	0.133499
Foxi1	196	1.5333e-10	1.57326e-09	0.108366	0.225931	-0.101532
Sgo2a	197	9.23649e-11	9.70964e-10	0.134913	0.135487	0.132893
Ilf2	198	4.66036e-13	5.89497e-12	0.328871	0.270216	0.273578
Tmem109	199	1.60029e-14	2.32978e-13	0.376579	0.285973	0.194011
Lypd3	199	1.63604e-12	1.97863e-11	-0.0283262	-0.0860703	0.186891
Timm17a	200	4.27587e-17	7.4644e-16	0.468566	0.219683	0.0161837
Arpc1b	200	2.19489e-14	3.15966e-13	0.545779	0.0277065	0.489653
Baz1b	200	1.17493e-10	1.2218e-09	0.180522	0.197509	0.193908
P4hb	201	8.15623e-17	1.41107e-15	0.428732	-0.000813895	0.0999404
Pdlim4	201	1.68527e-12	2.0318e-11	0.215351	0.178124	0.233006
Cdt1	201	4.97521e-12	5.66205e-11	0.210148	0.19877	0.190066
Hist1h1e	202	2.86417e-10	2.88511e-09	0.243205	0.249776	0.241288
Fam96a	203	1.65136e-16	2.79428e-15	0.411572	0.263975	0.158009
Olfml3	204	2.27693e-16	3.83597e-15	0.315593	-0.0811185	-0.0411834
Baz1a	204	1.73227e-12	2.0755e-11	0.047332	-0.012717	0.219629
Isyna1	205	3.22316e-16	5.4065e-15	0.218711	0.117808	0.159488
Slbp	205	2.69146e-10	2.71824e-09	0.24986	0.269167	0.268705
Mlec	206	3.26889e-16	5.45947e-15	0.384468	-0.143869	-0.0364953
Mnd1	206	2.01907e-11	2.23197e-10	0.178044	0.162195	0.166922
Bzw1	207	2.02773e-12	2.42198e-11	0.199697	0.0537276	0.293058
Ska1	208	3.31202e-10	3.32754e-09	0.155713	0.156349	0.158639
Zwint	209	2.49404e-12	2.95153e-11	0.0331559	0.0115226	0.224315
Atad2	209	1.21058e-10	1.25212e-09	0.197237	0.201049	0.210182
Cavin2	210	2.49716e-13	3.22209e-12	0.244454	0.187765	0.119314
Rogdi	211	6.65494e-16	1.08332e-14	0.399992	-0.11841	-0.226258
Hist1h1b	211	6.20828e-10	6.03314e-09	0.156542	0.156312	0.156715
Hspa5	212	7.34158e-16	1.19008e-14	0.644267	0.0529896	0.158946
Espn	212	1.19761e-09	1.14083e-08	0.0346291	0.205246	0.20594
Fetub	213	6.40433e-13	7.94466e-12	0.342818	0.280457	0.274429
Reep4	213	3.68352e-12	4.29336e-11	0.17863	0.158525	0.2054
Hsd17b12	214	1.22376e-15	1.96719e-14	0.363464	0.0950824	0.0508885
U2af1	214	4.12297e-12	4.73405e-11	0.293195	0.232591	0.316607
Prpf40a	215	2.60818e-15	3.99301e-14	0.359092	0.235909	0.266928
Esf1	215	1.39796e-09	1.31866e-08	0.206686	0.223549	0.222113
2810001G20Rik	216	1.37429e-13	1.79729e-12	0.274652	0.209606	0.0856098
Pycard	217	1.65567e-15	2.59657e-14	0.418635	0.169555	-0.0598869
Phip	217	3.3801e-09	3.05471e-08	0.148181	0.199281	0.170487
Flrt3	218	2.35692e-15	3.65181e-14	0.281445	0.0643318	0.0599796
Plk4	218	1.85786e-09	1.72714e-08	0.109219	0.117743	0.119792
[truncated: 3,536 more rows]
