# Supplementary material for: Single-cell RNA-sequencing reveals distinct patterns of cell state heterogeneity in mouse models of breast cancer
Source: eLife. 2020 Aug 25;9:e58810. doi: 10.7554/eLife.58810 (PMC7447441; doi:10.7554/eLife.58810)
Supplement: Figure 4—source data 7. [file elife-58810-fig4-data7.xlsx]

## Sheet: Neu_4clusters_GO
	GO.ID	Term	Annotated	Significant	Expected	Fisher.classic	Clusters
2	GO:0051301	cell division	168	10	2.26	0.00015	4
3	GO:0031503	protein-containing complex localization	48	5	0.64	0.00039	4
4	GO:0009165	nucleotide biosynthetic process	72	4	0.97	0.00045	4
5	GO:0000070	mitotic sister chromatid segregation	44	4	0.59	0.00262	4
6	GO:0050658	RNA transport	36	4	0.48	0.00559	4
7	GO:0051225	spindle assembly	28	3	0.38	0.00589	4
8	GO:0006611	protein export from nucleus	31	3	0.42	0.00785	4
9	GO:0007059	chromosome segregation	79	6	1.06	0.00788	4
53	GO:0022600	digestive system process	21	3	0.29	0.0027	3
54	GO:1904589	regulation of protein import	21	3	0.29	0.0027	3
55	GO:0071156	regulation of cell cycle arrest	22	3	0.3	0.0031	3
56	GO:0050766	positive regulation of phagocytosis	22	3	0.3	0.0031	3
57	GO:0003281	ventricular septum development	22	3	0.3	0.0031	3
58	GO:0001934	positive regulation of protein phosphorylation	256	8	3.51	0.0038	3
59	GO:1900182	positive regulation of protein localization to nucleus	24	3	0.33	0.004	3
60	GO:0043392	negative regulation of DNA binding	25	3	0.34	0.0045	3
61	GO:0006641	triglyceride metabolic process	26	3	0.36	0.005	3
62	GO:0055085	transmembrane transport	247	6	3.39	0.0071	3
63	GO:1905897	regulation of response to endoplasmic reticulum stress	30	3	0.41	0.0076	3
64	GO:0017015	regulation of transforming growth factor beta receptor signaling pathway	31	3	0.43	0.0083	3
65	GO:0048732	gland development	142	7	1.95	0.0092	3
101	GO:0010811	positive regulation of cell-substrate adhesion	37	5	0.49	0.0001	2
102	GO:0050821	protein stabilization	48	5	0.63	0.00035	2
103	GO:0008285	negative regulation of cell proliferation	203	9	2.67	0.00086	2
104	GO:0001952	regulation of cell-matrix adhesion	35	4	0.46	0.00102	2
105	GO:0045597	positive regulation of cell differentiation	290	12	3.81	0.00112	2
106	GO:0097237	cellular response to toxic substance	48	4	0.63	0.00123	2
107	GO:0045638	negative regulation of myeloid cell differentiation	38	4	0.5	0.0014	2
108	GO:0001944	vasculature development	221	10	2.91	0.00191	2
109	GO:0050766	positive regulation of phagocytosis	22	3	0.29	0.00276	2
110	GO:0001836	release of cytochrome c from mitochondria	24	3	0.32	0.00356	2
111	GO:0002761	regulation of myeloid leukocyte differentiation	47	4	0.62	0.00423	2
112	GO:0032649	regulation of interferon-gamma production	27	3	0.36	0.005	2
113	GO:0003073	regulation of systemic arterial blood pressure	29	3	0.38	0.00613	2
114	GO:1905897	regulation of response to endoplasmic reticulum stress	30	3	0.39	0.00675	2
115	GO:0032760	positive regulation of tumor necrosis factor production	32	3	0.42	0.00809	2
151	GO:0035914	skeletal muscle cell differentiation	23	4	0.32	0.00025	1
152	GO:0002763	positive regulation of myeloid leukocyte differentiation	24	4	0.34	0.00029	1
153	GO:0009611	response to wounding	150	6	2.1	0.00142	1
154	GO:0008285	negative regulation of cell proliferation	203	12	2.84	0.00149	1
155	GO:0045638	negative regulation of myeloid cell differentiation	38	4	0.53	0.00176	1
156	GO:0044237	cellular metabolic process	2083	32	29.14	0.00246	1
157	GO:0032623	interleukin-2 production	20	3	0.28	0.00248	1
158	GO:0071248	cellular response to metal ion	43	4	0.6	0.0028	1
159	GO:1905954	positive regulation of lipid localization	21	3	0.29	0.00287	1
160	GO:0050680	negative regulation of epithelial cell proliferation	44	4	0.62	0.00305	1
161	GO:0046683	response to organophosphorus	24	3	0.34	0.00424	1
162	GO:0043392	negative regulation of DNA binding	25	3	0.35	0.00477	1
163	GO:0032368	regulation of lipid transport	26	3	0.36	0.00534	1
164	GO:0014074	response to purine-containing compound	27	3	0.38	0.00595	1
165	GO:0001942	hair follicle development	29	3	0.41	0.00729	1
